# Supplementary material for: Genome-Wide Identification of Long Noncoding RNAs in Human Intervertebral Disc Degeneration by RNA Sequencing
Source: Hindawi journal article supplement (doi:10.1155/2016/3684875), 2016-01-01
Supplement: f4 [file 3684875.f4.docx]

| **Test_ID** | **Gene_ID** | **Locus** | **Length (nt)** | **Sequence** |
| --- | --- | --- | --- | --- |
| TCONS_00  010579 | XLOC_001763 | 1:119952262-120088536 | 205 | CTTTCCAACTACCTTAAATTCAGACACATTTCCTTAAGGAATCTTCTCAGAAATCTCACCCTCTGATCTCCAGAGTCCAGTCTCTTCAGCACCATAGCACCCCAAACCCCGGCCTGGCCCTCCGCATTTAGTCTACTCTGACTCTTTTTCCAAAGCAACCAATTGCTTTTGAGTCTCCAAAAAAAAAAAAAAAAAAAAAAAAACC |
| TCONS_00  015189 | XLOC_002536 | 1:192578149-192604567 | 2346 | AAATAATGCAAGACAAAAATGTAATTAAGCATGAAAGGAATTTATGTATTAGAAGACTATTGGATAGTTCTCATCATCTCTAGGAGGCCCAGAAGTTGGAAACCTCCTCCCAAATCCTGCTGCGAAACTGTCCCACAAATTGGCATCACCACCACCGCTGGGCACACACACTGCTGCTTTCAGAGCCAAAACCCCAGACACCAAGCACCATCTGCTGCTACTGGATCCCACAGCACTGACGTGGGTTGTAGCTGTCACCTCCTCACCACTCTCGCCGGCAGCATTCTGCAGTTCCTCTTTTTCATGTAACTAACTTTCGATTCACATCCTGCCACAGACACATCTGATTGGCAGGTACTATGGCATGTGCCCATGTCATAGCTAAAAGAAAGGCTGAAACATTTGTAATTTTTTATTTATGTAATGGGAGATGGGCTCCATATTATAAGGTAGGGGATTCTTCAAGAAGTTTCGGTACTGAGAAATAAAATTGAATGACAAACAGGAACCAAAAAATGCCATGGTAGAGATGAAGAGAACCCAAAACCTCTTTTTCTGTCCTTGTTTCCTTTTCTGAAACAAGTGACTAAATACTCAAAGTCCATGGGGAATATGACAGATCCATTCTAAAAACTAACACCTTCATGTTCAGCCAAGAACCAGCAAGTTCACATCTTACTTGAAGAAAACAAACCTTTGTATAAGTTGGAAGCATAGTATCACAAAGTGGCATACAGGGGTAAATAGATGCCTGATTTGCTTCCAGTCAGCCAGGCCCAATAATGTCCTTCAAGCCTGCAGAACTATTGCCTCTGATGTTCCTCCACCACCCTGAAACAGAACCAATAGCGGCTGATCTTGTGTCTACCCGCAACCTTCTCTTTCGTGACAAAGCAACATGCAAGTGGAATCCCAAGCAAACCAGAGGGGACGGGAGACTGGTCAAGTCTCTGAGTCGTCCACTCCAAGATGCGGACAATGAGTGTATGAAGACAGACTGAGAATGCGCTGCAAAGAAGCTTGGAAGAAAATGAAGGCAGAGAGGACAGACCTGAAAGGCTAAGAGGGACAGATCAGCGTCCATGGAAAGCAGGAGCAGAAGCCAGTCTTCTTCCAAACACTGGCACAAACCACTGCCTACTGGATACATTTCACCAGACAATTCACCCCAGTGTCCAAGAGTTTATCTTGCTTCTAGAATATATTGAAAAGAGCCACCCTCTGAACAAATGGCAAACACTATATAGTATAAATAGGATGCACTGAAAATAGTAGGCTTATTTCTTAAGCTGTCATCACGAACATTAACCAGTAATTATATTTCTCCACTTTTTGTAGAAGACATAAATGGCAAATTCTGAATTTATAATTTCTAATACTTCATTTTTCTGCTCTTGTAAAGTTCATTTTGAACTTTCAACATAAAAATATTAAAGATTTTTAATTGTGCACATTTGAACTTGTGTTACTTTGGACTTACATTGGCTGAAATTGAAATATAGTAAAAGTGCTCTAGAGTAAGCAGATCAGTTCATCAGAAGGACAGCCTTTCAATGGAAAGGGCATTCCCAAGCTGCACCAACGAAAGCATAATCCTGTTACCTGCCCTAACCTGACAGCTCTGAATTAGTCTGATCCACCTATGTGCCGTACAAAGCATTATATTGCTATGATTTCATAAACTGAACTTGAACTACACTTTTTCAGAGAAACAAAACCATGTTTAGAAATCTGCCACAAATATCTACACATTGCTCTTGAATTCCTCCAGGAATTTCCACCTACTCGTGCTGTTACTCTTCACTCTATGATTTATTTGTTTTTCAGTCCCTGTCGATACTTAAGTTTTACTCTGTAGGGAGATTCTCATGTTTGACTCCATTAAACAAGCTTTGAAACTGACACTCGCACAGGGTGTTACTTCCAGAATCTTCCTGCCAGCTCCTTGCATCCACACCATGAGAAAGAGCAAACATTCCAAATCCCAAAAAAATGAATTATTTGGGGTGAGGAAAAGTCTTGACTATGACACTGAAGATTTCCTGAAGAGATCCAGCATCCAAAATGTCCTGAGTGGGGAGGAAATCGCACACCTAGCACCCAGAGAAAATGAGTGCTATCCACAAACAACCCAGATCCTCCCAAGCTGAGGCTAACCTGCCCTTCACTTCCTACATTATTGCTACATCTACGCAGCTTCTGACTTTCCAAAGTTTCCTTTCCTTTTCTAGTCCCAAACTTATCTCTCAGGTTTGAGAAATTCAATTTTCTTGGGTTTGAATCTCAAAATTATAAAAGACAAGTAAGGTTAATCTTCTATCTCATTGGGCCCCTAAATATTTTAAG |
| TCONS_00  018500 | XLOC_003130 | 1:236305831-236445319 | 751 | CGGTTAACTTTGGAAGGTGATAATGACTAGGAAAGTACACATGGTAATCTGGACAGCAAGTATAATGCTCTGGATGGTGGCTATAGAGTTGGGTTCACTTTGTAAAGTTACATTGACCTTTACACTTAAGAATTTTCTATTCCACCATATGTGTATTATACTTAAATTTTTTAAGTTTAAAGAATAATTTCTGTTCAACAACAAAAAACTATATGCAAAATTAAAGGACAAATCCTAACAACACAGCCAACAAAGAATTATCACATTATATAAAGAATGCTTACAAATCAGTAATAATTTTAAAATCCAACCCAATGGAGAAAAAAATGACAAAGAATATAAACTGGCAATTTACCCCAAAATCTTCCAATGACTTAAGCCTAGTCCCTAGATCATTCCTCTATTTACACTCTCTCCTTGGTGATCTCATTTAGGTTTATGGCTGCTAAACACCATCTATTCATTGACTGACATCCAGACCTCTCCCCTATTTCAGATTTGTATATCCAACTGCCTACCTGAAATCTCCAAGTGGATGTCTCACAGGCAGCTCAAACTTAACAAATCCAAATTTGACTATAACTTTGTCTCAGACTTGCTCCTCCTCCAGCTGTCCACAGATCTGAAGCAAAAATAAATACAATAAAGTAAAAACAAAAGATTACACGGGAGAGAGAGCAAGAAGAAAACGCAAAGGAGGCACAAGAAGGAGACAGAGAGAGAGGGTATGATGATCTTTATTATGGATGCG |
| TCONS_00019315 | XLOC_003302 | 1:89294-461954 | 481 | CTCATTCTTAGTATGGTTTTTCACTTTAAAAAGCATAAAGGTGGACATGGTGGCATATGCTAGTAATCCCAACTACTGGGGAGACTAATACAGGAGGGTTGCTTGAGCCCAGGAGTTCAAGGCTATAATGTGCTATGATCATGACTGTGAACAACCACTGTACTGCAGCCTGGGCAGAGTGACATAGTGAAACCATATCTCTAAAAAAAGAGAAAATGTAATTTAAATATTTAAATACATATGTATATGTGTGTATATATGTATATATATTGCATATATCAAAAATGGTTTGTAGTTTCCATTCACAGCACATAGTAAAATGTCTTAACCTCCTCCCTCCTCCTTATGTGTGTTTTTCTAAGTGTGTGTCTTTTTTACCTTAATTTTTCTCTTAGTGTCTCATAGTCTTCTTAGGTCTCCCTCTTTCTTCTGTCTTTCACACACACACACACACACACACACACACACACGCATACACACA |
| TCONS_00020981 | XLOC_003495 | 1:10444348-10454377 | 586 | TCTCTTTAATTCTTTTTTGAGATGGAGTCTCACTCTGTCGCCCAGATGTAACCACATTTTCTAACAGCAGTTTTATCAGTAATAAGGGTGGTATTTTGGTCTCCCATCTCCCATCGTCTTATTTTTTGTTTCTTAATTGGTTCTGAAATTGGGAAAAATTAGGGTATCCCCTGGCTCCCTCGGACTTCTTACACCTTTCAGTTAACAAAACCTGTGGTCCCTGCTCAGTCCTTCCTGTAACCTATTGGCTGCCCTGGACAAAGCAACCACTTCCTCAGTCTTCCACACTCTCCCTCCACGGCCACTGCTTGTCCTCCTGGCTGGACTCCTCTCTCTTCCTGACCTCCATGTGTTGGAGCGCACCAAGCTCCAAGATCAGTCCTTGGTTCCTGTCAGCCACACACACGCTCCAGGTCTCCTTCCCTGCCTGAGGCTCGATCTGCTATCTTCATGCCGCCAACTCCCAAATGTGTGTCTCCAGCTCCAACCACTCCCCTTGAATCCCGCTAGTCCAGCCAACTGTTTTGTTGACTATACACTTAGGTGCATGTGTTGGCATCTGAAAGTGAACATGACTCAAATCAAA |
| TCONS_00023750 | XLOC_003907 | 1:33597444-33606476 | 2831 | TCTCCTTCTTCCCCAGTCCCAGAAGTCAGCAGCTATTAACAGTCAGTGCGAGTCTTGCAGGCATTTTTGCTTACACATAAACAAATGTCATTTTCTTTTACACAAATATGATCATCTTTCACATACTGTCCATCTTTCTATGTGTTCTGTGGTGTAAGTAGAAGCCCAACCCTTTCCCCTGCCACCTCCCTGGACCTCGGGCTCCTCAGGCTCCTACAAATGAAATTATTGGTCAAAAGATTTTCTCATTTAAAATGTGTTGCTTTCCTGGGTCGTTTTATTTTCTTGTAACATGCTCATTATGGAAAATTTGGAAAATACACAAGACACAAAGGAAAAAAATCATCCATCAGCCACTGTCCAGAGATAACTGCTGCTAGCATTTTGAGGATAAGGTTTACAGTCTTTCTTTCCTTTTCTTTTTTTTTTTTTTTTTTTGTTGTTGTTGTTGTTGAGACAGGATCTCGCTCTGTCACCCAGACTGGAATGCAGTGGCACGATCACAGTGCCTCAGCCTCCCAACTAGCTAGGACTATTATTGGGCGTGCTAATTTAAAAAGAAATTTTGCAGAGACAGGGTCTCGCTATGTTGCCTAGGCTCATCTTGAACTCCTGGTCTCAAGCAACCTCTCCACTCAGCTTCTTAAAGTGTTGGGATTACAGGCATGAACCACTGCACCTAGACCAGCCTTTTTTCTACGTGAGTCTATTCTACGTAAATCAAACCACTTTGCCTATTGTTCCATAACCTGTTTTTTTCCACTTAATAAAAGATTGTTATTCCATGTTAGTCTACAGCATCAGTTTAGTATGCTGTGTGACCTCAGGGCCACCTTAGAAGCCTACTTTTCCTAACCCCCATTCTGAGTAGGGAACCTGCCGCAGCAGATGCCCAGAACGCTCTTGCTCCAGGGTGTAACCTCTGCCTACTGGCTCCCTTTCAGGAATAAAATGCCCTGAGAAGTCCCTGAGCACTTGCCTCCTCCACCTCCCCTGAGCTGAAATCCCAGCACCCCACTGATGGTTATGCAGTCCCCCTGCAACTTCTCCGGCGCCACCTACCGGTGCAGCATGGGTGGCTTGCAAGCTGCAGTGATCACCATCCCGGCCCTGCTCTCCTCATCCACTCTGCTGGTCATCAGCTGTATAAATGGAAAACGTGCCGCCGGTGGTCCCAGGTCACCTGCCCCAGCCCACCATCCCCATGAGGGGCCCAGGTAAGCCATTCAAGGTCCACGATGACAGGGAAGATCCACTGCTCTTTTACTCTTGGTCTTATTGTGCAAAACACCCAGGAAAGGCCCTATCAGATCTGTATTGCCCAAAGGTGTGACATTTAAGAGTGACATTAAAAAGAGAAACTCTCCTTCCTCTCTTGAGGCGACAGGGACAATGTGCTTAGCTGGATAAAGCCTCGCAGAGGCCATGAGCACTGTCTTTGGCCTCACAGCCTCCGTTGCCCTTGTCCAGGATCTGTTGAATGTTACTCACCAAGCCCTTGGGTCAAGGAAGGTCCATTCTGCTGCCCTGTAACTGTAACTGTAAGTGACTATGGGCCAAGGCTGCCCTCGACCCCACAGTGTCTCTCTCCTGACCCACTGGGCCTGATGGGGCCTCCGCAGGGAACCTTACCAAGGAGCACAAAGCCTCCTCCAAGGAGTGCACTCCTGGTTTCACCCCAGCTGAGGTGTGGCTTATCACATTATCCAGGGCTTGCAGCCCTTAGAATTTTCCACTTCTCCCATCTTAAAACATTCCCCCATGCTTTTCTGAAGTATTGGAGTTACAGGAGGTGCCTCTCATGCCGCTAATTTTAAAAGCCCAGAATTCTCATCACTACCCAAGATCTCAGGACATCTAGTCTGACTATGTGTCAACCACAAGGTTCATGGTTTCTTCCACTCATCCAATGACACTCAAGTGCGTGCCATGTGCCAGGAGTGCCAGGTGGTGAGTTTATAACAAATGAGACCCAGAATTAGTAAGCCAGTGGTTAGAAAAGAACAATGACAACAGAGTATGAGAAGTGCATGTATGGGATACAGGGGTCTGTGGGAGCATAGAGAAGGAGCAACTAACCAGTCAGGAGAGGAAGGTTAGGGGGAGCCTCCAAGAAGTGGCATCTGAACTGAGACCAGAAGGATGACTAGGCACTTGCTGGAAGGAAGGAGTGAAAGGATAGTCCAGGCAGAGGGAACAGAAAGTACAGTTTAGGGGTTGACAAACTATGGCCCACCTCTTGGTTTTGGAAATGAAGTTTCACTGAAACACAGCCATGTCCAATCACTTATGTATTGTCTCTGGCAGCTTTTGCTCTGCAGGGCAGAATGAAGTAGTTGCAAAAGAAACACTAAGAATTACAAAGCAAAAGAAGTATTGACTATCTGGCCCTTGACAGAAAAGGTTTGCTGACCCCTAGAGACTGGAGAGCTCACGCTGCCTTTTAGGGAACATAGTGGCTGGAGGGTAAGGGTGGGAAAAAAGCAGTAGGCAGCTCACAGTGCGTTCTTCCCATAGCCGTAGCAGCTGGATCCAGAGTAGATACACCCTGATTTAAACTGAGCTGATCAGAGTCTGTCTTCTCAGAAATTGGAATGTGGGATGTCAAATTCAAAAATGGAGCCCGGTCACATTAATGCCTGTGAAGCTCTGCTGCGAAGGCCCCTCGAGCCTGCTCCTTGCCCAGACTGCTCAATCAACCATGCCTTGATTCAGAAGGCCCTTGCAATCAATTCCCCTAACATTTAATTTTCATTTCCCCTCAAGGTTTCTGTTACTTTCAATGAAAAAAAAACAAACCTTTCATTAACTAAAATTAAAGTCACTGAGAG |
| TCONS_00028718 | XLOC_004727 | 1:108552616-108556645 | 1418 | AGAGCTGATGCCTCAATTTTGGAGCACTGAGGTCATATGAAAGGTATTTGCTGGATGAGAGAAGCCAGTGGATTTGGAGAGAGGCAACAACACATGAATAAAGGGGTCTAATTTAGAGCTCTGAAGACTGATGCCTGTGACCCCAGCTATGAGAGGATCAGAGAGAACCTGATTTCAGAGACCTGCTTTGCTTGGGAGAACCAGAAGGCTGCCAGGGCAGTGGTCACTCAGATCTGTTTATGATAATGAAGATGGATGAAGCGTGCCTACCATGACCTGCTCAAGCCACGTGACTGTGTTGGAGTTCTGGAGAAGGGTTACTTCTGAGGGCAGCACTGAAAGCCCAGAACCAACTCTGAGGTGCAGCTCAGTTAGGAGAGCTGAGGTCAGGGGTCCTGGGCTCCTGTTGGGGCTGGTCTGTTGGGGGGAAACCAGCAAGCTACCATAAAGGAGCACATACTTCACTGATTTCTCTCCATCCCTATTCCATTCTACTCCGTTTCCCTCCTACCTCCCTGCCAGCCAGTCCCACAGCTAAATCAGCCACCTTACAGCCCTGAACAAGCTGCCTGCCCCACCGGACATTCTCTCATGTCGCTGCCTCAAAATTCCTGCAGATTTTGATGAGGTATGGACATTCAGAAGCCTGAGAAACTGCTGCTTCATCAAAATTGTATCTCCTACTTTAGTTTGCTATTGTAGACTAGAGTGAAAATGACAGAATTTATATACCTGAGTCATCAAGCTGGGACAGTTGGTCTGGAAGGGCTGTTGCTCTAATTGTTGGCCTCTATAGACAGCCCAAGCTGAATGGGACATAAAAACGTGTGACCAGCCAGAAAGTGAAGGCTAAAGGCCAGGGGAAACATGGGGGCATGGTTTGTAGTTCATGTAATTGACAGGGCATAAAAAGAAGAGAAGGTTGGAAACTAGAGTGAATAGTGGTAACTATAGTTGTCGCCTGTTCAACGAGCTTTCCTATCCTCTTCTCCTGCTTCCTTTGTTGAACTCCTCCTGTACTCCACATAGTCTGAGTAAGGCTATTAATCAGAGTATATCTCTTCCATACTCCATCCCCACTCTGCAAAACTACAAAGCTCACAGGGATGGGCACATGGCTGTGCACCTAGGTCAGGCCAATGTTCTCTTTGGAATGTCTCTGTGGGAGCTAGCACAGAAGGCTGCTAGGAAAACATCATGAACAGCAGAGACAAATGGAAGAAAGAGAAATAGGCGGGTGGGAAGAGGGAGAGAGGAGACAAAGACTGAATTGATATTGACATTGTTAGAGCTTCTGGATCCAGCCATGCTAGATCTACCTCTTGACTTCCCAGTTATTTGAATCAATAAACTTCTTTCCCCTTGCATAAGATAGATTGAGATTGATTTGGACAAAATGTGTCCTGATGAATTTACCAAGGTGGGCCAGAGGACAAATGGAGCAAGATTAGATGATTTAGGAACTGATGAATCAAATACTG |
| TCONS_00035986 | XLOC_005954 | 1:221982848-221993279 | 3249 | CTCTTTCTCACATATCACCTTTAGAGATGTTACATGGTGACCAACTGTCATTAACTTTGGATGTTTTTCCTGGAGGAGGAGAATGTGCAGGAATGAGAAGAAAATACCATCAGAATCATGTGGACCCACATTCATCCCTTACTTCACCCCTTCTGGGAAGGAACCCAGCAGGCTCAAAGATATGGAAAATGCCACCAGAAAAACAGTACCTGGGACAGAGGGTAGAGATTCCTATGGCAGGAATGAGACTACTTTTAATCTTTCTTCCGTCATCTCAGCTTTTAAATTTCTCCCTAGAGAACATTTGGGTAGTAAGATTCAGAGGTGCATGTTAGGGTGTCAGGTGCACCCTGTGTCCTGGAAGTAGATGGTACAGGCTCCTTTGTCTGGAGGCAAAGCGGGGCCAGAGTGGGCAGGGTCAGTTTCAAGGCTTTGGGAAAGCAGTGGTCTGGCAGTACTCTTCTGGCTCTTGGAAGCAGGAATGCAAACTTGATTCAGGCTGGGAGCAAACACCTGTTTCATCTTTCAGGAATATCAGGAGTATAGCAGCAGGTGACAGGGTACTTTGCAGAACCAGCAGAGGGGTGTCACCTCACACCCCAGGGAGCCATAGTGTCCCAGTGTGGAGGCAGAAAGGTAGAAAGGGGTCATTGGAGTAGCTTAGAGTAATCTTGTGAGCTTTAGGCTTAAATCAGCTGACTGAGCAGGGTCTTCTCTTCCACTGTTCAGGATGAGGCTATGCCTGGGGTCAAAAAGAAAAAGCCTCCAACTATTTTACATTGGCAGCTATGAGGATGGAAAAAATAGTAGTGATGGTGTTTGTTTTTTCATTAACAGGTTAACCTGACCATTGTGGGAATGTCATTAAATATTTTTCTAAGATATAATTTTTACTGACTAATGCTTGTGCCATTACTTAAACCATTACCTTAAATTGTTTTCTAATATAAATAATTCTGAGATGAGCACCTATGAATATATATTTTCTCCCATCACTGAAGTGAGATTGCTGAATCAAACGATGGAAGGTTTTGAAGACTCTGGATACAGTTTTCTAAGTTCCTTTCTAGAAAATTGTGTTAACAAACGCTCCCAAGAGCAAGGCAGAAGAAGACTGATAAATTTGTTCTTGTGACTTTCTCAGGATGTGGACTTTGGAGAAGTAATACCTGCTGATCCTGGACTTCTGAGAATGGGTGTTTATGGGATAAGATGGGAAGGTTTTCCAGCCTCCTTTAGGGAGGTCATTACCTTCAAATGAAAAATTGAGGTCACACTAGATATACATACACATAGAAAGTACAATGAGGAAATGAACTTCAAGTAGGAAATCAAGCAGGAAATAAGTCAATGATGGACTAATCTCTCAAAGTAAGTTGTTCTGGGAGCTCTGAGAGAAGGCATAAGGGGTGTGTATCCAGCACCTGATGCCAAGACAAGCTTTGCTCAGATGAAGACAACACACAGCCTTTCCACTCCTTTTGGGTTGATTGTGTCCCATTTCTTCATTATTCTTTTCTTCATTTAACATTAATTGAGCACATGGTGTCAAGCACTGTAAAACAAAAGGGGGTGCAAAAGTGAGGAGTTCTCAGTTCAGTGTGTCTTTGAGTAAAGACGGGACTAGGAGTAGATCCCAGATGTGCTAACAACAGTTCCAGTATGATACCGTATCTCTGGAGATCAAAGCAATTATCCCAGCATAAATTTAGGAAAGACTTCTGAGATGAGGACACTTGAAAGCAGTGGAGGCCAAATCATCTTTGATCACAAGGAGAAAAAGAGAGAGGGCATTCCAGAAAAGCACATGCTAAAGCATGGAGAAGTCAATGAGTCCCACATGTTTGTGATTGTGGCAACATAGATCATGGTAAAGGTGGGGGCAAGAGGACAAAAAAGGTCAGAGGCACAGTGACAAGAAGTGAGGCTGTAAAATAAGTCAGTTTCTATTGCAAAGTCTTTGTATTCCATTCAAAGGGCTTCAGCCTGTCCTACAGGAATGAGGAAGCCAGGGAATGTCTTAATAGATGCCATTTATATAAACCCATATTTCTGGTATAACTGGTGGCAGAGGAAATGGGCTGGAAAAGATGAGAGCCTGGAATGGGAAATGACTAAAGTCATGACATAAAGACATCGACATGCATAGATTTTGTGGTTAAACACATTTTTTAAACAGAGGCAGAAAGAAGAAAGTGTATGGCAGAAATGACCAGAGACCGCAGATGAGCTCATGGTGGACAGTGATGAAGTTTGAAGCCAGGGTAGCTGTCATTGCAGAGAATGAAACATGGCCAAGAACTTCCTAAATATTAGACTAATGTCATTATTTTTTCCTTACCTATGACAGCTGATGAGCCAGTGTGATCTATGATCTTTCTGGGTATTTTATTAAGTTTTCATCACTGTGCTGCCTTTGCAATCCACTAGCCTCAGGGAACATTTGAGACTTGAATTTGAAAATGACATTCACAAAATTAGATATTCTTCATGTGTGTGTGGTGTGTGTGTGTGTGTGTGTGTGTGTGTGTGTGTGTGTGTCCTTTTTTTTTCTTTTCCTAGCTCCAAACTGTCTTCAAAGGGTTATAAAGAATGGGGTCTTTGAGTCCTTTAACCTTTAGCTATGAGATAGCTAATTTTTGTTCCCCAAGCAAACATGTCAGAAATGACTCCCTGTTTCTTTATTATTTGCAAATATATGTTCTTTTATTCCACCCCCTTTCCCCTTGGGAATGAAGGGCCTCCTTGGATGGGCCTTAGGCCCAGGCTCTCAGAAAGTTAAGAAGGCTTTGGAGGGTGTTCTGAGGGCAGATAAATGGACAAAATAATGGTGCAAGGAGACCGTGTTGGAGAAAATTCAGTTAGGCAAGAAGCACCGAGGAGTTCGACCCGGGAGGAAGTCCAGTGAGAGCTCTGGCAATGTGAAACCAGGAAGTGACCTTTAGTTAATCAAGTACCGAAGATGAGAGGGCAGACATAAGACTCAGACAAAAAAAAAGTGATAAAAATCATTCTGAAAAGGGAAATTCTAGTTCTTTGTTCTCTCTTCTTATCATATAATTTCTCAGGCTCTCTCTGTATCGCCGGAGGAACATGAAAAATTTAATTAATGACTCGAACATTTTCATGTAGGCAGAGGTTTGGTTTCCTGTAGATAAGACATCTGGTTAATCAAGTGAACTTTCTCCTTTTCATCCGTGTTATGACACTTGTATATTATGTGGCCACATGGTATTTACTAGCTCACTT |
| TCONS_00077599 | XLOC_013630 | 11:93048349-93049548 | 694 | CTATCTCTGTTTCCTTCAGTCTCAAGTGATCCTGGGCTCAAGTGGTCCTCCCACCTCAACCAGAATGAAAGGACATATTTCCAGACTGAATGAACCCCACGAACTACTCAGCATCCCACGTTAAAGTAGACTCATGCAGAAGTACATCATCATGAAATTTTGGAACACTGCGAACATGCAGACCCTAGAAGCATCCTGATTTTTTAAAAAACTCACATACAAAGGATTGAAAATCAGAATATTGTCAGACTTCTTAAAGCAAGTTAAACTGCAGAACAATGGAGCAATGTCTTCAAAGTTCTCAGAGAAGATTGTTTCCAACCTCTAATCTGTACCCTAACAACTAATAAAGTGTGAAGTTAGAATAAGGACAGTTTCAGGCAAACAAGATCCCAGCAAATTTACATTCTATGCATCATTTCTCAGAAAGCTAAAGGAGGATGTGTTCATTAAGTAAAGAGTAAACTAAGAAAGGGCAAGATATGGAATCCAAGGAACAGGGACCTCACTCAAGAGAGTCAAAGGGAATTCCCTGGATGACAGCAAAAGAAGATTCCCAAGGCAACAGCTGTGTTGCATCCTTGAATGTAACTGGCCCAGACTGAAGAGGAGGACAGAACCTCCAGGAGGAAAGGAGGAAGTAATATGTGTAAAATTGACATAATCTTCAATATGTTTGATGTTTTGAGTGGAG |
| TCONS_00120736 | XLOC_021124 | 14:86226469-86227955 | 818 | GGAATTTCTTTCATCTCAACTTCATTTAGTGTGAGCCATTGTTGAATCTGGATTTCAGTCAACCAATTCAGAAAGCAAAACAATTATAATCACTCTGAGCTACTCGGGTAAGCTCACTGCATGTAGGCTCTGGTACATGTACCAATATTGGCTAATTTGCCCCAATCTGTTTATGATTATTTCTACCTAGTATAGCTCCCTTTGACTCTAGCTGCACATTTCCTCCAGGTTTCTGCTGATAAAAAATAACAACTATTGCCATTTTTGTTGTTGTAGCCTTTTCTTTCTGGTTCACACTTTGTATTTGACCCCTTCTGACACATTGGGAACAATTCTAACTTCAGAACTGGAATCAGTGAGGTGATTAGGGTGGCCAAGAGGAGAAATGGCATTCTTTAACGCATTAGATGAGTTAGTTGGAGATGGGGCATTTGGGAGGTAATTAGGTCATGAAGGTGTAGCACTGTTGATGGAAGAAGTGCCTTTGTGAGAAGAGTTACAGAAATCTTACTTCCTTTCCCTTTCTCGTCACCATTGAGAAAATACAGAAAGAAGACCATCTACAAGCCAGAGAGCAGCCTTCACGAGACACTGGATTTCTAGAGCCTTGATTTTGAACCTCCCAGCTTTCAGAACTGCTTCTTCTTCAGTTGACCTCTTGAAGTCTCGGAGGAATGGCCATTTGTCGGGGTATGTGGGGAAGCAGGTATGTGGGAATGAATGGAGCTTGGATTTAAGGGCTGTGTTCACACAGAAGTGTGTAAGGCCCTTCATATTGAAAACAGAGCTGGGATGGGAACAGAAGGGGTGAAGTCTAG |
| TCONS_00129009 | XLOC_022334 | 14:89290496-89498098 | 1251 | GGAGAATCGCTCGAACCTGGGAGGCGGAGGTTGCAGACAGCCGAGATCGCGCCGTGCCACTGCACTCCAGCCTGGGCGACAGAGCGAGACTCCGTCTCAAAAAAAAATAAAAAAAAATAAAAAAAATTTAAAAAAACCTTGGAAAAATGCTTGTCTACAGAAATATAGTCCTATTAATTAATGTGAACTAACAACAGAACCTAGCTTTGTATTACCACTAACGTAGGCTGTTCTAAGAGAGATGTACTATCTGAAAGACAAAATGTTCATCTCAGCAGGTTATCATCCATCATCCATTTGCTGGGAGCTAAGGCAGAGCCTAGTAACAGCATTCACACTCAGGCCTCCGCTTTTGTAACTCCCTTCAATTTTCCATTTTTTCTAACATCTCCAAGGCAACACCACTAGAGGAAAAGCTAGGGAACTAGAACTACGTAGGTATATTCCGCACTTACTAAAAGCACTGACAAACTGCCGCAGCGCTACTTCTGTTCTCCCATTTTCTCCTTTTTTGCCTATTCCAGGAGCCACCTGCCCACCAGAATTGTACCGCTCACGTACATTGTATACTACCTTTTCCACTCGCTATACACATTACTCTAGTTTAAGTTCTCTTTTCATCAATGCCATCATTCCTTCTTGTAAGGAGCCTTTCTTTCCCATTTCTCCCTCCTACAATTAGAGCTTCCCTTGCCTAGGTAATTTTTTAAATAATGAATGTATCTTTCTCCCTCCTAGATTCTCATTCTTCTAATTTGCATATTTGCCTCAAGCTAAACTCATGGCCTCCTTCACTCTTGGACAACAGTCTAAAGATGAGGTGGGAGGATCACATGTTCGATCCAAAAGGAAGAAGGCAGCTATGTTAACAGGAGGTGGAGAGTCACAGATCTTTGTTTATGCATATTTTTTAGAAATTAACAACGCACACGCTGAGAGCTTAAAGCCCATCAATATGCAAGTATAAACGAATTATCAAAGTTCCTCGTCAAGTAAAGTTCAGGGCTCTCATTCTGGGACACGTATAGGGGAGGGGAGGCTGAAAATTGTGAGGAGGGGGCGGTCATGGCACAGAACTTGCTATCCCCGTGGACGTGGCGGACAGCGGACCCGCTAGTCACAGCTCCACAAGGTCTCGCTCCGGGCGCCTCCGAGGGCCGAACGGTCAGCCCCGCCTCGGGCCTTCCTCCCCGGCCTCCCAACCCGGGGCTGGGATATGCCCCAGACCCCGCAGCCTCAGCGTCAGGATGC |
| TCONS_00145154 | XLOC_024898 | 15:72533521-72888847 | 1340 | CCAAGAAAGAACCAATATTAATGAAAGACATCAACACAGATCCAAGAAGTTCAGTAAACTCTATACAAAGAAAAACATACCTAGACATTCCCTAGTCAATCTACTGAAAAGTAAATATAATGCACAGATGCAGCCATTGAGAACAACCACACATTACGGAAAGGAAATAAAAATTAAAATGATGAATGACTTCTCACCAGAAACAAATGAGGCCTGAGTACAATAAAATAACTTCTTTAAAGTACTGAAAGAAGAAATAAAAGGTCAACATAGAGTCCTATATCCAACTAAAATACCCCTCAAAAATAAAAGTAAGGACATTCTCTTATAGACAAAAGCTGAGAGAACTCATCTCTTATTAAAAACTGCAGTAGGGCCAGGCGTAGTAGCCCTACTACGCCTAGTGACCTGTAATCCCAGCACTTTGGGAGGGATTACAGGTGTGAGCCACCAAGCCCGGCCGTATTTCCCAGTCTTTTTAAAAAGGGAAAGACAAAACTTTCACTTCTAGCAATATGACAGACTAGGTTACATATATACTCATTTCTATATATGATATTTTTATTAGAAATACATTTTGAAGATATGTTAACAAGTAAATAAGAAACAGATGCAAACCATATTTTAGATTGTACCCTGGCTAGGAAAATCATTTGAAAAGAATATTTCTGGGACAACTGGGGAATTTCAATATGGAATGGGTGAATGTAGGAACTATTAAATTCCAGGGTTCCACAATTACAATAAAATCACCAGACTGAAAGGAATGAAAAGTGCTTTAGAATCTAATCCACACCTAGTGTTTGGATCCCTTCTATAACAGTGGGTCATTTCCCTACCTAGCAATAGGGAATTTCTCAGTTCCTGAGACACTCCATACCAAATCAGCTCACCTATAATCATCAGCGCTTCTTGATGAACAAAAAGGTTTAAAAAAAATTTAAGTAAGTAAGATATTGCCTATAAATAGCACCAGGGCCATTTAACAAATGCTGTTCACTACTGTTCTTCTTGGGGTAGGAGGGATCTTGAAAGCAAGACTCTACCAAAAGCTAAAATGTGCTATGTAACTACATTAATGAAAAGAAAATAAACTTACTATAAGAATGTTCTTGATAAATATTTTGGATAAGATTCCCTTTCTAAATGTAAATAGATATCCAATATTTACTGGAATGTCTTTCACAAATCCTTCAGAATTGAAAAGTTCTACTCAATTATTCCCTGGGCTGGGCGTGGTGGCTCACGCCTGTAATCCCAGCACTTTGGGAGGCCGAGGCCAGTGGATCACGAGGTCAGGAGTTCGAGACTAGACTGACTACTAAAAATACAAAAATTAG |
| TCONS_00147551 | XLOC_025177 | 15:91073156-91260372 | 1790 | CTGGAGTGCAGTGGTGCAATCCTGGCTCACTGCAAACTTCCACCTCCAGGGTGCAAGCAATTCTCACGTCGCAGCATCCTGAGTAGGTGGGATTACAGGCGTGTGCCACCATGCCCGGTTAATTTTTGTATTTTTAGTAGAGATGGGGTTTCGTCATGTTAACCAGGCTGGACTCAAACTCCTACCCTCAAGTGATCCGTCTGCCTTGGACTCCCAAAGTGCTGGATTACAGGTGTGAGGCACACACCCAGCCCAGGGAGACCCTGTTTCTACAAAAAAATTAAAAAAATTAGCTGGGTGTGGTGACATGGGCCTGTAGTCACATTTACTTGAAGAATCCCAGCTGAGGCAGGAGGATCACTTGGGCCCAGGAATTCAAGGCAAGGGAGCCGCGATCGTGCCATTGTGCTCCAGCTTGGGCGACAGAGTGAGACTTAAAAATTATGAAATGTCCTCTCACCCTCGCCCAAAAGAGATCACTCATACGATCAACACGCCACGGCTAGTAATTGGTAAAGAGTGACCAATAACAAGATCCTCTAACTCTCCGTTGTGTTCTGTCAACTCTTCCTTCTAAATCATTAATTTATGGCGAGGTGGTGAGTAGTTAATGATGCTGTAATAGACAGAGGATGTGACAAAAGGTTGAAAACACATTCCTCGATGATTATGGTATAAGGAGAACCACCTCTGAGTTTAGAATTTATAGGATGTTTCAACCCCTGTGTTTCTATAATGGGCTTTTCTTTTCTTTTGAGACAGGGTCTCACTCTGTTGCCAGGCTACAGTGCAGTGAGGCTATCTTGGCTCACTGCAGCCTCGACCTCCTGGGCTCAAGTGAGCCTCCCACCTCCGCTCTGGAGTAGCTGGGACTACAGGCGTGTGCCACCACACCCAGCTAATTTTTCCATTTTTTGTATGGGTGGGTGACTTTTAAATGTGCCTCTTTCTCAACAGACTTCTTTTCATCCTTATAAGAGATATAATCCTCAACATACTTAGCATTTCATGAACAATAAAAGTATTGTTTCTCAAATCTGTAGACAATTAGGGAAGAGGTCTAATTCATTATCAAAGCTTCAGGAAGGTATTAAATGTTTTCTTTGGCTTTCCCCTATGGCTTAATGTACTTAGAGAGTCAATGACTGATTTTCCATGCCAACTTTGAAATCCTAACCTGGTTTCCCTCAGTTGCCTTAGACTTACCTGGATGGCATTCTCTATATCCTACCGTTCCTCTCAACCCCAAGTTTGTGAGTTAGTGACTACAGATTGTTCAACATTTGCTTAAAGAGTAATCAACACAGCAAATCTGCTATTATTATAATAAAAAATCATTAATTAGGCTGGGTGCAGTGGCTCATGCCTGTAATCCCAGCACTTTGGGAGGCCACGCTGGGAGGATGGCTTGAGTCCAGGCATTTGAGACCAGCTTGGGCAACATATCGAGAACTTGTCTCTACAAAAAAATCAAAAAATTAGTCAGGTATGGTGGTGCATGCCTGTGGTCCCAGCTACTCCGAAGACTAAGGTGAGAAGATCGCTTGAGCCCGGGAGGTGAGGCTGCAGTGAGCCGCGATTGTGCCACTGCACTCCAGCCTGGGCAACAGAGTGAGACCCTTTCTCAAAAAAAGAAAAGAAAATCATGAATTCATTCTGCATTATTGACACTTCTGCTCTGATTTCACATATAAGAGCGAACAGACTGCACTTGAGACCTCATGGGTGCTTGGTGTAATAATGAGTGTAACCCAAAATAGTAAAGAGGAGGAATGCACTTCCTATATCTT |
| TCONS_00162256 | XLOC_027116 | 16:15005407-16444465 | 235 | CGCAGGGTAGGGAGGGCCGAAGGCACGAGGCCAGTAAATCCTCATTAATCTGGCAAACCCATGGATTAAAACAGAGCTCTCCAGAGGCAATCTTCCCTGGAATCTGAAGCTTGCCTTTTTAAGAACCAACTTTTTTCTCATTGAAGCCTTTAAAATACATACACATAGGCCGGGCGTAGTGGGTCACTCCTATAATCACACACACACACACACACACACACACACACACACACAC |
| TCONS_00167230 | XLOC_027802 | 16:73489940-73926210 | 939 | GTTCACACATTTTCAATACCACGAAAGTACTGGTGAAAACTGATCAAAGCTGGGAAATTCATTGCAGTAGCTGGAACCCCATCTCGAGTCAGTCCCTTATTACCCAGGTATTGCCACAAATGTGATTCAGCAAATAAAGCCCCTAGCTCGCTGCCTGGCCCCCTCTGCAACCAGGGAGCAGCAAAGTGGATCCGCAATGGGGTTTTCAGAAGGACTCATAATTTTTCTACATTTGCTTGCACCACAATCTGAACATTTTTGACATCTGGCTTACTGGTGAAAACATACATATGTCTCTGTGTATACATATAAGTACATATATTTTTGTCTTTGTCAGTCATTGTATGTGAGAGGGATGTTTTAAAACAGAGTCTCCAGGTTCTCCTTTGTAAAGCATTAAGCTGTGACCCTCCTCCTTTCTTCCCTCCCCCTGTAGCCCTGGACTTCATGATGCTTCCTTGACTGCTAGCTTAACATGGAGTTGTCTTTTTTATTTTTTTTATAAACCCAGTCACAACACAGAAAGAGGAGGAGGAAGAGAGAGAGAGAGAGAGAGAGAGAGAGAGAGAGAGAACTAAAAACCCTGAAGGATGGTTCTCAAAAATTCTAAAGGAACCACAGGGAATTCCTTTTAAGAGCAACAGAAAGCAAGCTAGCTGAGGCTTCTGGACTTTTTGAATTCTGAAACCAAAAGAAGAATAAGTCGAAGAAATTTTACTTTGGGACTTGGAGAACAAGGAACAAGTATAAAATATCCCTGTCTCACGACCCTGTCAAGTTCTCAGGGAGATGAACATATGAGAGATTGCGGGACATCCTTGCAAGAGGAGAAAGGCTCCTGACTCCTGAGGAGGACTCTGCTGCCCGCTGGCCCCGTTAGACGGACGGCTCCCCTGGCATCCTATTCTTGTTTGGACATTTTTAAAGACCACATATGGT |
| TCONS_00194872 | XLOC_031436 | 17:78234664-79329659 | 1282 | CCCCGGTGATGCTCCCATGGTGAGGAGCCCACCTCCACAGCAGCTCAGTCCTCAGTTGCAGTTGGCAAAATCTAGTAACAGAGGAGAGCACGATTCTGTTTCTGAGCCGAATGTTCTCCGTCTGAGCGTCTGAAACCACTCCTCACTCCTTTGTGCCTCCCTCCCTGCCCTTGTTAAGGAACAGCATTGGAGCTGGGACATGCCACTCAAGGTGGAGGCCACATTCCCTCCCTCCCTGGATGAGGCTGGACCAGACACTGCCACAGGACAGGGGGGCGATGGGCATGTGAGCTCCAAGTCTGTCCCCCAGGCCTGAGCTGCCTCGTCCACTCCTCGCGGCCTTCCCACCTGCGGGAATGTTGCTCCAGTGGCCAGCACGAGCTTCCACGGGGGATGGAAGCCTCCAAGACAGGAGCCGCCTGCACCCTGACACCTGGGGCCACGGCAGCCTATGCTGCCTATGCTCACACATGCCCATTTGTAAAGCCCCTGGATCACGGGTTCCCAATGAATGGGTGTTTCAACTAGTACACCTAACTACCTCCAGGGAGAAAGGCAAACCATTCAATGGAGTTTTTCCACACTAACCCAGCCGGTGTCTCAAGAGCGGTGTTGGCTGCATGCCCTCCGTATCCACCTGGCTCAAGCCCTTATAGCCAGGCACCAACATCTTCCTCATCTCTGGCTCAGCATAAAGGCCCTCCACAATCAAGACCAGTACCAAGTCTGTGTGGTTACGCCTCCCTAAATCTGCAACATGGTAACATGGTGGAATGGACTGGCTTCTTGTTAAATTTTACTGTGTGCACAGTGATACACAGGGATACACGGTGACATACAGGGATACACGGTGACACACAGGGATACACAGTGACACACAGGGATACATAGTGATACACAGGGATACACAGTGACACAGTGACACACAGGGATACACAGTGACACACAGGGATACATAGTGATACACAAGGATACACAGGGAGATGCTGCTGCCCTCTGTGGAAGTTCACTGTCATCAGAGATCTGACATCTCTGCCTCCAGAGCCTCGGCGGGATTCCGATGGACAGTGATAAAGTCATGCATGAAATTCATCACGAGCAGCAAGGACTGCTCATATCTAAGAAGGCCTGGGGTTTCCCAGTCTTCCAGAAGCCTCCCTCCTGTGTCCAGACTAGTAAACTCACTCGTGTTAAGGACGTGGTGAGAGTGTCTAAGAGTTAGAATTAGACTTCGAATGTTAACACGCCTAGGACAGAGTGGAGGTAAAATTCTGCAATAACG |
| TCONS_00194873 | XLOC_031437 | 17:78234664-79329659 | 724 | CCCCTAAGCCTTTCTGTGGCTCTGGCCTTCTCGTGGTACCCCAGGCCTGGCACACCCCAGCACCTCTGACATCTCTAGCCCTGTGGCAGAGGGACAGCAGCTGCCTCTGACCGACCCCTGCTTTGGGTCAGTCGGAGGCAGCTGCTGTGGCCCCGCCACAACATCCAACATGAACTCTCAACTGGAAGTGAATCATCACCTCGCTCTCAGCACAGCCACAGAACACAGTCTTGATCTCCGCGGATACAGGTTGAGTATCTCTTCTCTAAAATGCCTGGGACCGGAAGTGTTTTGGGTTTCCGATATTTTCAGGTTTTGGAATATTTGCATATACATAATGAGATATCAGGGGATGGGACCCAAGTCTAAGAGTAAACTCCATGTATGTTTCATATACCTCTTACACACACAGCCTGAAGCGAATTTTACACAATTTTGTGCATGAAACAAAGTTTGCGCCCGCAAGGTCGGGAGGGGAACTGTCCACCTGTGGCAGCGTGGTGGCCCTCACAGAGTTTCGGATTTTGGAACATTTTGGATTTTTGAATTAGGGACACTCAACCTTCGTCGTAGGGATGGAGGAAGGACAGCAATCCCTTCAGCCCTACTCTCCCTTTCTGCTAGAAATATGTTCCTTGTGGAAACCGAGTGATGATCAGTATACTGGATTCTGCTTCTAGCACTGCGCTCTCTTCTCCTGGGTAATTTTCTAAGAGACTCGAGG |
| TCONS_00198853 | XLOC_032144 | 18:55297533-55500627 | 1518 | CCCGTCTCTACTAAAAACACAAAAAAATTAGCTGGGCGTGGTGGCGGGTGCCTGTAATCCCAGTGACTTGGGAGGCTGAGGCAGAATTGCTTGAAAACTGGAAGACAGAGGTTGCAGTGAGCCGAGATTTCCCACTGCACTCCAGCCTGGGAAATAAGAGCAAAACTCCGTCTCAAAAAAAAAAAAAAGAGAAAGAAAGAAAAAATAACAAAAATAACATAGGTAAATTAACAGTTATAATATTAAACAGTCTCTTTTGGCTAAACCTGTTATAAATCACCACGGCATATAAATGTTAGAGCTTAGATGCTGAATAAACCAACTGGCCTTGAAGCCCACATTTCTAATTCTCATAACAGATTTATTATGAATCTCAAATTTCACAAATTTGTCTGTCTGTGTAAAATTGTTTTGGAAGATGTCAATAAATGTAGAGGAATGTTTAAAATCTGAAGTTGGAAAAAGGTAAAGCAAACATTAGTTTTTAATCTTTTGCTCACTTGAGTAAATCCTTGAAAGGATTAAAAAATATCCAACTTGTGAAATTTGTTTAAAGTCCTTTTAAAATAAAAATGCATAAATGTATAATTACTCTAAACCTAACTGAAGACTTTATAGAATTCACCCAATTTGAAAACAGGTCTTCTGGCCTGTTTCCCAAGTCATTATGCACAGCTGTGGGAAACATCCTGTTGTATGTTTACATATATTAACAGCTTCAGGAATTTCACAATTAAAACTATGGTGGGCTGGTTTCCAATTCAGGCAGCTGGGTGAGGGGGTGTGGAGAGCAGGCAAACCAGAAATAAAAACAAGCTTCTTGAAAGATGGGGGAAAGGAAATCGTAACTACTTAGTAATCAGGAGTCCATATAGTTTGCCAGTTCTACTAAACGCTGGAGGGATTTCATTTAAACCCTAAGAAATACACTTGTTCAATCATTTTGCAGCCTTCAAAATCTCTCAGTTGGCTTCAACCAAGAGGTTGCCTGATGGAGGTAATATTGTACACGATATGTAAAAAACTTTTATTTTTTTCTGTGGACAGTTTCACCCCAACAGAAGGAAGCTGTGGTTTCACCTTTCTCTCTTTTGTTTTTCCAGCATGCCTGCCCCTCGTCCTGACATAACTGATTAGGAAATGATTTCTAAATGGTCAAGAGTCCAGCCTCGATAGCCACTTCTCTGATTCCAACAGAATTTCTACAGAAGACAATTTCCTTGTCTCAGCAAGGAGGGAATACAGATGAATTGGCAGGATCAGGAGCAGCCATGTTGCACCAAGAGAAGATGAAAAAAGCATATGTTGCAGATTGCAAAGTAACTAGGTAAGCATTTGAGTCCCTAAAACTATTCCTGGTATGACTGGTAGCGGCATACTAGCTTGGACTTTTTTGTGTCAGAGAAATAAACCTTCATCTCACTTAAATCAGTATTATTTGGGGCCACTCTCTCTGTAGTAGGAGTGAAACTAGTATCCTAACTAATTTAACTGTCAAAAGAAAAAAAAATATGAGGC |
| TCONS_00203552 | XLOC_032918 | 18:67666619-67669549 | 2263 | CGGAGGCGCAGAGCGGTTAAGTAATGTGCTCATTGACTGTGGCTGGTTATCAGTGAAGTGGAGGTTGGAACCCAGGATAACTGCGAAGAAGTTTGCTTTTCTTTATAAACCACTTTTCTTTATAAACCATTTATTCTGCCCCTCTACCACCCCCACTGAAATATCTCTTTTTGTGTTTGAATCTTATAGATAAACACCATTTTTCAACAAAAATTTGTTCTCTTCAGGGAAATTATATTATGGTTCATTGATTGACTGATTCACATATCAGAGTAGGCACTACCTCATCTTCTTGGAACCAGGAAGAATTGTTGTAACTGATCATTTTCCCTAGCAGTTCACAGTAGTACCAGAGGGAGATTTGTAGCCTAGTAGTCAGAACCACCCAGAAATGTTACCTGCCAAAGCCCAGGAGGACTGCAGACCTTGGAGAAAGGAGAGGGGCCATGGCTTTAGGGGAACTTGCGTTTGCCTCTCTTGGTGTCCAGGAATGTGAAGCTCGGGTGCACGCTGTGGTCCAGATCCTGGGGGACAGTCCTTGCAACTGGGTCTCCTGGGATTATGCACCGTCAGCCAGTGGGGAAGACGTCTCAGCAGGAGCCTTGAGGTGACTGGCCCACTGCTGTAGCAGCTGCCCTGCCTCTCCCTTGCGGACCAGCATCAGAATCCTCAGTGTTAAATGGACTCTTCATCCGTGTCATTTTGCATCATCAGTCTTTGGGGCTGCACCTTGTGTATTCCCCATTTCTTGAGGTTGCCAGAGCCCCAGGTCTGCTTCTTGACCCGTGATGTTCCTCGGATTTGCCAGAGTGATGGGTAAGAGTAATGACTGGCATCCCCGCTTCTGCATTAAGATCTGCTTGCAGTTATCTCAGTGAATGAGAGAGCATAATAGAGCGGTTAAGAGTAGAGGGCTCTTGAGTCCTGTGGACCAGGAATTAACCCTGGCCTCACCACTGCAATTGTTGGAAACCTGGGACAGGCTCAAGCTAACTGGGGTTGAGGACACCTACCTTGTGCAGTTGGTGAGAGGACTGAGTGCTTAGCCTGGTACATAGTTATCCCTTAGATGTTATCAGTGATTTTTTATTCTTACAAAATTCTCAAAAACATCTGTTTAAGCAAAAACTTCAAATCTTTTGTGTCCTTGCAAACTTTCCTCCCCTCTGGGAGGGGATGTGCTGGAAAGTGAGTTGGGCTGTGACAACTAAGGTTCCAGCATCCCAAAAGGATTGTTGGTTCTTGGTGGAGTGCATGTCCACAGTCCTGGGATGACTGATTGCCCAGACACTTGGCAAGGCACCATTGAGAACCCGAGTCTCACAAAGCACTGCATACAGGCATTATATACACCTGGGGTGTGCACATTTTGTTCTGCTTGTCATGTTGTCTTGATTGAGTGTCAGTTGGCAAAATTTTGCTCTTTTTCCATCTGACTTGTGTAAATGGAAGATTAAAAAATTATAACCTTAGTAACCAAAACAAAATCTTAGCTTAAAAAAAAAATCCTTCAATTTGGGAGTAGCTATTTTTTTTTTCTTCCCATTGATCATTATCCAAAGACTAAGGGGCATGGATGATAAAATGCTATTGCTTTGGTCAATTAGGAAACTTAGTTTTGGGGAACGTAGAGTTTATTCTTCCTAACTTAAAATTTCTCTTAGGAAATTCTTTTACAACTCAAGTTTCCTTATACAACTCAAGTCCCGCACCTAGGGCTGTGTGGGACTTCGCCGGGCCTCAAGGCTCAGATGTACGAAAGGCTATGCCAAGACCCCGGGAGTCTGAGGTTTGGCAGCAACACAGAAGGAGCTCAGTGTGATCCTACTTTAAATGTTTCCAACAACGTTCGTTTTTGCATTTTGTTTGCTCCTTCCACATTGGAGGAATCTGCTTCAGAAAAAAATCTTTAAATCCATGTTTTACAAAATACCCATATGGTAACATTCAATAAATTTCTTTTTAACTAATTTTGCGTGAAAGCTAAAAAAAAAAAAAAGTGTTTTAGTACAGACTCCAAGGTAATGTTCTTTGACACATTTCTACTTTTCAGTGGCATCCTTACCTCACTTTGGCCTCTGCCAATGCTTGTGCCTTTGGAGTATCTGCACCCACTTGGGTTCTTCTGGGCAGCGATACTTGGTAGTCTGGTAGCAGATTGCTTGCAGTTCTGTGTAAATTCTGAAATCATTGTTTCTTCAAACAGTTTATTGGAACATTCTTTCTTTGGCTTACCATGGAAGTAAACAGATTATAAAATGGG |
| TCONS_00212347 | XLOC_034129 | 19:41277552-41406413 | 670 | AAAAAAAAAAAAAAAAGCATAGCCTCTAGAGTCAAACAGATCTGACTACTACATCTGTGCTAGGTACTTTCAGTGGTTGAATCTTAATGATTCTGACTCTGTTTGCTCACATGTAAAATGTGGATGATCATAGAACCTTTATCACAGATTTGTGAAGACTGCATTGCACACTCCATGAAAAGTTATCCTTAGCACAGCATCAGGCACAGGGAAGCTCAACGCCTTGAAGGTGCTGTTTTTATTTCTAGGTCCCTAAGATCTTCCTCGTCCTCCTTATGGCTCCCCCCTTTATTCTCCATATTTGTTCCTTCCTTGAAAGTCAAGGGTGCAGGAAGAAGATGATATCCTGGAGGCCAAGCCCACACAATTAGGACATGTGGTGGACATTCACCTGTTCTTAGATCCACTGCTGCTCTTCCTCTGCTTGTCTATCACAAGGGGCTGACACCTGCACACTAATTCTGTCTTGAGGGAGACTGTGTAGGGGAACATGGCCATTTGAGTTCATTAGGAAAGGGTTTTGAGGTCAGGACATGGGTATCTGGTGTACATGGGAGTTTGGTGGCCTCTATTGTAGGAGGCTTTGGAAATGTGTATTGTTGGGAGGTCCTGAGGGAGGAAGTTTGGGATGAACATGGCCATTTGAGTTCATTAGGAAAGGGTTTTGAGG |
| TCONS_00222512 | XLOC_035272 | 19:20718630-21015646 | 474 | GTAGCTTTTAACTGTAGGTTGGATTGACATCTTTGAAAAATGACATTTTTTGACACAGAGCAAGAATATGTTGAAGAGTGTGTTTCATATTCACAGTTTTGAATTTGCCAGTTTGACTTTTGCTTTTAATTCCTAGTTTCATTCAGTTTTTATTAGAAAACACACAGTGTGTAATTTTAGTCTTTTTTAAATGATTGTTTTTGTTGTTTTGAGGCAAGATTTTACTGTCACCTCGTGTGAAGTGCAGTGGCATAATTTTGGCTCTCTGTAGCCTCAGCCTCCTGGGCTCAAGTGATCCTTTTACCTCAGTTTTCTGAGTAGCTAGGACTACAGATACGCACTAGATGTCTGTTTAATGGTTGGTTTGTTTGTAGTGTTCGGATCTGACTACGTTGCCCAGGCTGGTCTTAAACTTTTGGCACCAATGGATCCTCTTACCTTGATCTCCCAAAGTGTTAGGATTGTAGGCAACAG |
| TCONS_00222516 | XLOC_035273 | 19:20718630-21015646 | 447 | TGATCATTCACTACAGCTTACTAAATATTGTTCTATGATGCCAGTGAACACTTTTACTCAGGGTACCCTTTTCCTACCATTAATGTGGTCCTGTTGTGGTCTCCTGTTTCTCTTAAGCTATCCCAGATGAGAGGTGATTATTTCTTGCATGAATGAAAGTCCCTTTTTTACCCTCTGCCATAAGATCCTCTTATTCTCCTTACTGAAATCAACATGCAGGAGGCAGGAATGATGACAATATACAAACATGTTTCCTGTTATGTGGCCACCATAAGCAGCTTACAACATGTTCCACCAAGAAGTCACTTACTTTCAGGCCAGCAGGGGTGTTTTTCTATGACGTGTCTCTTTCTCTCAAAACCACATCTGATTAAGTTTAGCACAAGCAGGATAATCTCCATTTTGATAAACACAAAGTCAACACATGAGTAACCTAATTTCATGAGT |
| TCONS_00233880 | XLOC_036882 | 2:49026268-49037295 | 1318 | GCCATGAAGGAGAGGCTATGATGGATGGTCCGGGGAGCCTCACCCTAGCCTTGGCACAGGGCAAGGCTATGAAACTGCACTTTTCAAGAACCAGCAGGGAACATTTGGAATTTCTCCTGTTAACACAAGGGACACATAATTTGATTTTTTATGTTTTGTACTTTTTTTTTTGCCAGAAAAAAGGAGAGTCCTTGGATATTTTTGGAGAGTTTTATCACCTCCAACCATTTGGTTTCAAGGGTTTTAAAACATGGAGTGAAAGTTATACACACTTGCAAGAGGATGAAAGTCCAGATTCTCCCATCACCAGCCTCTCTCATAGGCAGAGGTGGCCATGTGACCCAGTTTCGGCTAACGAGATGTAAGGTGGACTCTACTCAGGGTCTTCCAGGAAAGATATTTTCCTTTCTAATTGTGGTGAAGACTGCCAGGTATCTGTTATTTTGTTCTTCCCTTTTTTTTTTTTTTTTTAGAACTTTTAAGTTTTAGCTGTGCATATGGCTACTAGGAATAAATACTGCATTTTCCAGTGTCTTTTCTAGCTAGTTGTGGCTTTGTGACTAAATCCTGGCCAGTAGGATATAAGCAAAAGTGTTTTGTGGCAGCTTTCAGGAAATTTCGTCAAAAGAAAGCTCTCATGTGTCCTTTTTATTCCTCATTCCTCCATCCTGCTGGCTGTAATGTTGACATGATGGCTGGAGCTGCTGTAACCTTCTGGAACTATGAAGTCACCTTGAGAAAGGAAGCTGTGACTAGTAGAATGACAAGAGAGATGGAGGCTTGTTTTCTGAAGGGATCACAGAGTAAGTAAACCTCATACCAATCCTGGACAACCTACCTCCTCTAGAGTGGCGAGAACAAGATTTTGCCTTGCTCTAGACATTCTAATTTTGGGTCCCTATCACTCATTATCAAAACTAATCCTAACTGATTCACTAATGAGAGGGAAGAGTTACATGAAGACAACTTTCTTGCTCAGTCACGGGCAATCTGTCTCCCATGATCTGCCTGTGAACACAATGTTTGCATCTGTGGCAGCCACCTTGCAGCCCTGAGTGAACAAGGTTGAAAAGCAACACACTGAGGATGGTGGAGCAGAAAGCTGGAAAGCAATGAGTCCTCAGTGATGTCACTGAGCTTCCAAGCCCATCTATTTCTGTACATTTTTTGAAAAAGTAAACAACAAGTATCCTCACATAGTAAGCCACCGTTAGTCCAGTTCCCTGCTACTGGTATCTTAATTAACTTGGTTTACACAAATCAGTAGTTCCTTGTCTCATGCCTGCTCATCCTGATTCTGTCTCTGGTAGGGAACCAC |
| TCONS_00235453 | XLOC_037168 | 2:74211336-74335303 | 6217 | GGAGAGTCCAGTAGAGTATCAGCCATTACTAGGAAACCACAGATATTCCTCCCACGTTGGCATGGACCCGATCAGTAGGTTTCCTTGAGCTTGTCCCCCTTTTCAGGGCTAAGGAGCCACTGTGAGTTTGGGATTACTCAGCAGTATCCTCTGCTGGCCCAGGGCGGAGAAAACAGATTGGGAGGTGGCTCTGTGTGGCTGCCTCTGAAGTCCAAGAGCAGAGAGGCTGGAAGGGAGCATGGGGCAGGTGGGCAGGGTCAGGGCTCATGGAACTCTTCCTAGCGGAGAGGAAGCGCGTTCCTGCCCCTGCCTCAGCCCACCTGCCCCCTCAGCCGCTGGAGTCTTCAGGGAGCTGGGGATCTTGGTTGCTTGGGTAGCAGGTGGGTGAGCTGCAAGTGTCCCCAGATACCCTTAGTTTCCTCCCTGGAAATTCTCTTCCCGCCCCCTGGGAAAGCTGTGGGAAGCTCCATGGAGGTGCTGGAAGTGGCATCCTGCCACCTTACTGACTGGATATGGATGCTGGTAGGGAGGGGCTCTGCTTCCCACGTGGGGGATAGGGACTTCTAGGTGAGGCTGCAGGGTGTATCAGGAGGCCTAGATAGTTCCCTGGCTTTGTCCCAAGGAACTTGAGGCAAGTAAGTGCTTGGGGAAGGGTGTGAATTTTGCTTCTGGAGCAGCTTCTGGGAAGGAGAAGAGCCAGGGGGCATCGGCTTCCCCGTCTAGCGGGTGTGCTTTAGTGAGACTGGGAGTAGTGGATGATCACCTGGGATGAGGCGGTGGGAGGCTGGGAGGTGACAGAGGGCAGTTGATACGGGCGATACTGTGGGTGGGGAGGAGAGAGCTGAGCTCACCTCAAGTTGGCTCTCACTACACACTCTTTTCTACAGCCTTCTCTGGAGCAGAACCCCCAGGTTCCACCTCTGCTTCCTCCCCTCGCCTCCCGCTGCTGGCTGGAGGAGTTGTAATCACCTCATGTGCTGTTGGAGGGGTGTGGGCACAGAGATCGTAGAGTAGATCTGCTCTGTCTCCCAGCCTGGGGAAAGCAGGCCAACGGGATGAGGACAGATGGACTCAGGGAGGGGGCAGGCCCCTCTCTCCTCTGTATCTCCAGCCTTGTCAGCCTAGAGCTTCCCTCTCTGCTGGGAGAAAGGACGGGCTGGCAGGTTTGTTTACTCCCGAAAGCACCCCCTTCCGCTGTAGTGATGGCTCTCCCTGGCAGACCCGCTTCTCTTCAGCTCTTTCCAAGTGTGTTCTCCGTGTCTCCCTGCCTGCTGGCCCCAGATAGAGGCTGGTTTTCCGCAGTCCTGCTGGAAGCTCCCAGCCTAATGCCCCAGCCTTAGTGTTGTGGACATGTGGCAGGGGCTACTTGAAAATCCAGAGGAAGCCTTCCTAACAAGTCTTTCTCCTTCCGCCTTCTCAGAGTAGGGCCTGAGCTGGCTGAGTTTTTAAAACTCTGAGGTTGTATCTATGCTTGTTTTTATTGTTCAGTTGTCTGAGAATCATATGCAGCTCAGGCACTGCCAGCAAACACTCAGGTCTGAGTCTTCTGTCCCTGGTGCCACCTTCACACATAGAGTTTCCTTGGGTGGCCAGTTGGCTGCAGTGTCCCACATACCCAGGGTGAGGCAGTTTTGCCAGAGGCCCTTCCATTTTCAGGTCGTGGTGTAAGAAGGATATGTCTGATGTGTGAGCTCATCTTGGTCTGGTGTGAGATCAGACCAAGACCCTGGGACACGGGACACGGGGGTGTCACGAGATGGGTGCTGGCTGAGGAAGCCCCATGGGAGAATGGTATCTGGTAGCCAGTGGGAATAGACACATATACGATGTGCTAAGTCCTGCCAGGGTTTCAGGAATACCTATGATGTACGTATGAGTCCACATAGTGCCTAGCATAGGCACAGAGTTGAGCTTGATAAACGCAAGTTGACATTTTATTGTTTGGTGCATTACATGTCTACCCGTGATATCTCAAGGAACATGCTATAGCAGACACTGTTGCTACCACCTCCTCGTTGGCAGCCTGGAGAGGAGTGAGTGCCCAGTGCCGAGAACACCGGGCCGCCCTGCTTTCAAGGCTCCCACACGGCTCCCACACTCTGCCCCATGGGAACCCTTGACTGGCTGAGGATGTCTGGAAACTATTTTGGGATTGTGCCCAGGATCTCTGCCTTCTGTCTCTCCTTTTGACCACTGCAAAAAAAAAATGCCCTGTTCTCAAGGACCTGTGATCCTCGACTTTCTATACACTCTGGGTCCTTCCCACTACTTGTTTCTTGCCTGCTCTTCCTACTTCCAGCCACTTCTCTCTCGGGTATGTTTATAAGCAGCAGCCAGCTTGGGAAGATATGGAAGCAGGTGAGCATGTCAAACTAGAGAAGTGAAGGAACTAAGCAAGAGATTTTCAGAGTTGAGTTTGAGGATGGAGAGAAAGAGGGGGCTTTCCCCATCCATGATAAGAACTGGAGTTAGAGTCCCAGAGCTCAGCTCCATCTCCTTGGTGACCCTCACCCTTTTTGAATGTCATGGGAGAGGGAGAGAGCCTTGCAAGACATACACATGAGTGAGCTGAAGGGAGAGCCCTCCTGTCCACAGTGGTGCAGGGGCCCTGGACCTGCCCTCAGGGACCACCGTGGGGACGACTACAGCCCTTTTGCTGGGCCTGGTGAGGAGGGGCCTGGGCACTGGGCTCCCTCCAGCTGCAGATGGAGGTTTCTGCTAGAAATGGGCTTTGTGGTCTTGCCAAGTCCCCTCCCATACCCCGGAGGCTGCAGCAAATGGTTTGGCTGGATGGGGGTGGGGGCAGGGAGTATGGGAGGGGCTACGGTTTGGCTCAGCTTTTGGGTCTCACAATCCTCTTAAGTCCTCTTTCCTACCCTTGACCTCTTGGGCTTTCGGCCTCATTTCCTCTCACACCCGGGCATCTGGCAGTTAGCTGAGGACTCCCCCTTGTTCTCAGCGTCTCTACAGCTTCAGAGAAGGAGATACATTAGGAAGCCTTTAGGCAAATAGAAGGCAGGGAAAACTTGGAGGATTAAAATCTGTAGATTAGTGTATTCTCTAGGACTATTACCCCCATCTCTATCTATTTTCTCCCCCTTTCTTCTTCCCTTTGTCTTTCAACATCCACCAAGTATTTATCATGTTCTAGGTACAGCATTAGGTCCTGAAAAATAAGAGAAATCATTATTATTTGATTCTCACAAAACCATTGGAAGTAAGAGACATTGACTAAACTATTACCTGAAATTATAACTCTTGAGTGGGAAAGCCAGCACTGGAAGCTTTTGTGTTTTGTATATTGAATGCTTTTGACTTCAGCGTTGTGTTTGGGGCTGTGAACTTGCACATGGCAGACAGAATCCTCACCCCAGATGCACCCAGCACTTTACATTTGCTTTCTCTCTGGCTCAGAGAACCTCAAGGGACTTCGAAGGTTGACTCAACATGCCAAGTTTGTTTTCAATTAAGTCATTGTTTCCCGGATCTAGCAATGACAGAGGAGGGCAGTGGGGTCAGAAATGGGCTAGCTGGGAAGGGAGCTTAGTTTTGAAAGGCACATGTTGGCATTAGATGTTTCGGATTTGAGATTCTGAAAGCTGGATGGAAATACTGTGCCTGAGCAATCTACCATGAACCTGAAATTGCCTTAGACTCATTTAGAGTGTGGGCCCCGCAGCCCTTACTGCTTCAGGGGGCTTCAGTGAGACCCACTGACTGAGAGGAGGAGGGTGAGAAGTGCAGTTGTTAGTTTCCTTCCACTCTGTTTTCTACTCTACTCCTACTCCTGGGTTCTGTCATTAGCCATGGGGAGGTCACTTACTGTCTTTGGACTTCAGCTTTCTGGGTAAAGTGAGGGGATTGCCTTCCAAAGTTAAGTTTTTCTCAGACTAAATCTGGGGAAGGACCAGTTTTTTTGTTTGTTTGTTTTTTGTTTTTCAGTGTTCCCAAAAGATTGCAAAACTAAAACGTGGTCCCACTTACTTTGTACAGCGAGTTTGCAGCTGCTGCACGTGTGGCTCAGCACCATCCAAAGTGGTCTGTGAGCCATTCAGTGAGGCGAGCCAAGTGATCATGCCCTTGGATGTCATGGTAGCTTTAAATTGCTATAAAGGTTCCTAAAGGCTTCCTCTTGGTTCCTGTATTTATGTTGTGGTGGATTGGTGTTAAGCAGTTTACGGGCCATATCCTGAATAGCACTGCTTTTGAACTTTTATCTGGGACAGCATAGGGTCTCTGTTTTGATGCCTCCCCACCCCTTCTGGACATGACTTTTCCACTCTTCTATACCCTCCATCTTGGGGACAAAGCCTCCGCTTGAAAGAGTAGAGATCTTTTTGTCCCATAAGTTCTCTGAGTGCCCCAAAAGATTTACTTGCATCTCAGCTTCTGTAGATAAGGATGCCTCCTGCCTTCTCTTTCACTTCTGCAAGTCTGGGAGTCTGATGGAGGCCCGTCAGAGCCCTTGGAGCCCCTGTACTGTGTGTGTGTGAATTGCATGCCTTGGAGGAAGAGAACAGTTGGGGAGGAAGCCAAGTCTCCTGTAGATGCTGGTGTGGACTTGGACCCTGCAAGAGACTAAAGCTCCATTGCCACAGGCAGGGCACCTTGAATTTTGAGCTTATTCCATGCAGTGTTTGTTAATAACCTAGAGGTATACCCTTTTTCCCCTGGGGGTTGATTGCAGATTCTACCCTGATTTCTATAAACAAAGACATCTTAATATTTCTGACAGTATGAGCTTGACCATCTTCCCCCTACTTTCTGTTGCTGAGGATCTACGGCCTTTTTTGAGATGCTAAAGATTAGACAAAAAGTAAAAATGACTAACTTTCTTCTATTCTGGCTGCCTTAGCTAGAGGAGAGTAGGAAGGGAGGGGTGGGGGGAGGTAACAGTATCTTGCCACAGAAATATTCCTTAAGAGGCAAACATTCCAAGGATAGGAAGATTAGGGTCTAAAGAAATCCTGGTTACCTCCGAGGCCTGGAACTTTTACGCCCTTGGTGCTTAAGTAATTGGATTTCTCAACCCCGCCTCCAGGCATTTTTCCCCCGTGTAATCCTAACCTCATGGGCTTTGCAAAGGAAACAAAGGCATTGAAAGGGTTTGCAACTTGTCCCTGACACTGAGCTCCTGAGCTGTGAGCCCTGCCGACTGAGTGTTCCTCCTTTGCCTCCTCTGCAGCATCCACCGTCTCTCTCAAAATCCTTGTCCCCAGGAGTCTGTTTTTCTAGCCTGCAGGCCTTGGTTCCTAGCCCTGCTAAGCAGATGGAATTTACAGAAGGAGCCGTTTCCTGCCAGTCCACCTTCCTGTACCTCGGGGAGGTGCCATCTCTGACCCTGCTGGCCACTCTGCAGATGGGGAAGAGCCAAGGGAGGCTGGTAACTCCTGTAGGAGGCAGAGAGAGGCCCTGGAAAGGGATTCTGAGCTGAGAACCCTGCCTGGATCCATAGACCAACTTTCTCTACTTCATGTTCTCCCTTGAGAATGACTTGGCCCAAGGGTCGCACCCAAGGGAGAAGGTGCAGTGCCTTGGGGGAAGATATTCTTACCCTTTATCCTAACTCCTTAGAGAGCCGTGATGGTCAGGAGAAAGGGATAGGCAGGGAGAGGAAGAAAGGATGGACTTTTGAGTTCAACCAAGAAACCAATGGTAGCGGATTGTTTTTTTCCAAAATGCAGAAAGTTTTGAATTTTAAATGAGAATAATGTACGCCCATTTAAATAAATCAATATAAAAGTACATAATTAGAAACTGAGAATCCCTATTTCTTCTCCATCCCAGTATAATCACTATTAACAATTTATATATATCTTTCCAGACTTAAAAATGAGTACATGAACTTACTGCCTTCCTGCAGTAATGTGTTTGTACCCTACTTATTTTTGAGTAGTCTTTTATTCGCTCATAAATAGGTTGAAGACACCTTTCCATGTCAGTACATCTGTCTTTGCCTTTTACATGACTATTGAATATTTCATTTTATGGCTGTATTATAATTTAACTTCTTATTGATGGACATTTACAGTTCTAATTTTTTTGCAATTATAAATGTTGAGGTTATCAATATATTTGTATATAGATTTTTTTGGTTACTTAAGTGTTTGTATAGAACAAAATCATACAAATGAAATTTTAATTGACATTACCAAGTTACTCTCCCCAAAGGTAATTTGATAATATCTATCAAATTTACCTTCCCACCAACACTGAG |
| TCONS_00246461 | XLOC_038865 | 2:237476429-237491001 | 3540 | GGGCAGGGCGCAGGCTGCTGCAAGGCGGCCTCGTGGATTCTGGCCCCGGACGCACGAAGCGGGTTCTACTTTTTAAAAAAACTGCGTTGCCTTTTCCTTCCTCTACGTTAGCATCCTGTCCGGGGTCCCCGGCCCATGTGGCCTTTCTTCCAGCGACAGTACACTTAGCTCAGAACGGATTGACACCCACTCTGTGTTTCCACCGGGCGCGCAGGCTCTGCAATGCGGAGCGCGTTCTCTGAAGGACAGGCCCCGGAGTCACGGCTACAGCCACAGAAAGCGGAAACCGAGCTGCAGTCCAGAGGGGATCCCCGTACATTTCCAGCGGGCTCAGACACAGGGTCCCCCACAAGAAAGAAACAGGACAGAAAAAGTCAGGACACGTATGCTGTGGAGAGTCGAGGTCTCGCCTAGATCTTGGGTGTGGGTAGACGCAGCCGCTGGCAGTTTTCCTTTCCAGCGTCTCTGGGGAGCCTGGAGATGTCCTTGGTGCCGATGTGACACGAAGAGTGATTGCGCCGCCCTGCAGAGGCGGTGGCGGGACGCTGCGCTCGGGCTGGGAAAGGCCGGCCCCAGGGCGACCCCTCCGGAGGCCCCCGGAGAGCAGGGCTTTCTCCACACGGAGACTTTCTAGCCACGTGAGACTTTGACCTCCCAGTCCCCCAGATTCAGCGCTGGGACCGAGCGTCTGCTGTTATTTTTAGTAGAAGTATAAAAAGAATCTCGAAAAGTTTTAGCTCTGGAGAAGGCGTGAATACAGCTGGTGCCTTCATACACTCCACTTGAGCCGCTCTTTAAGAACTCCAGGAGATCAGAAAGCAATACGAAAGCCAGAGCATTGCACATGGGATGGGCTGGCGGGTGGCCTTTGGGTCCCTATCTTATGGACGATTTTTGTAAATGGGGCATTGGAGATGAGTATCACCTGGATCACATTTTTAGGTTGAATTCCTCCGTGGGGGGAACTTTAGCAATACGCATCCAAATAAGAATGTAGATTGCAATAATTGTAGTAAAGTGTTTGCCAGACTCATCTCAGAAAAAGACATTATCAAAAGGCATTTATTATCTTCCTAATGCGTGTCTGGCACTGGGCAGACACTGTAGAATACTATCTTGATTAGAGTCTCAAGGATTTTGTACTTAAAGTCCTTTACAAATAAAAGTATTCAAGTATAATCTATTATAAAGACTCTTTTCTCCACTTTGGGGATATACGGTGTGGCATCGATTCATTGGTCATACCAAAACTGTTACTTCTGTTTTGGAGGAATTAACAAGGAAAACCCAGGCTTAGTAAATCAACATCGAAGTTCAGAAGTTCAGAGTAATTTGTCTTGGGAACAAAGTCCTCCCTAGAGCGAAGAGGCATTCACAGGAGCTCTTGGTGTTAATGGGATTATTCAAGATATACCTGAGACCAGATAAATATTTGATGATTTTGCCAAGCACTAGGGTTTCTTTGCAGTTTGTCTTTGGCTGACGTTTTCCCCCCGTGGGGTTTGGACTTTGTGGCTTCACCAGATTTTGCAAATGAAAGAAGGCTGGGGTTTCCCAAGAGTACACTTGTGCAGGAAACAACAGACTAGTGAGGTTTACAAGAGGGGGGTGTGTGTGTGTGTGTGTCTGCCTGTGGGATGGGGGTGGCACGGGGGAGAGAGAGATGTGGGTTACAAAGCTGCCATCTAGAGGCTAGAGGCTCCTTTCTGCAGTGTATATAATGCAAGTCTGCAGCCAGCAGAGCTCACAGTTGTTGCAAAGTGCTCAGCACTAAGGGAGCCAGCGCACAGCACAGCCAGGAAGGCGAGCGAGCCCAGCCAGCCCAGCCAGCCCAGCCAGCCCGGAGGTAAGGAAACGGTGCTCGGGCAGCAGCTCTGCTCGGAAAGAAGGCACGGCTTCTGCTCTTAAGCCAAGTGGTCTTTTCAAAGGCCTTCTTTAAAATCGCTCAGATGGGTGCTTTTGAGTCTGCGGGTCTGGTTTCTGAAAACCCAGGCTGCACGCAGCTGCATTGCAAAGTGCTTTTGCTAATTCGGAGGGCTTCACCTTTCTCTTCAGAAAGCAAAGGGCAGTTTTCTTAAGTCACTTGCAGAAGGAAATTTCCATGTGTATTTAGGAATCTGGTGTTTATTTGCTGTGTGGCTATTTAAGCTCCAGTAAGCAGGGGAACTTTGCAAGAACACAGACTATCCATTCTGCCTGACCAATTTGGCATGGGGATTAGCTTGGCACCCACTGTTTACCTGTTTTGCTTCTAGTATATCAGTTTGGAAACAGATAAAATTGGCAGTAAATACGTAATTCCAGAATGATGAACACTTTATTAAGAGGCATCCTTAAATGGAGCAGAAAACTGCTGAGAATCTTTGTGAGTCCAAGATGTATTTGAATTCAGTACTTTGGGGGATTTACCAGAGTCTGTAAGTCCGGAAGCTATAAACGTGAATGTTAAACACAGCCCGGTCTTCTCTTCTCTTGATGGCACGCTTGCTAATCTAATTTGAGTATTGTTCTCTTAGAAGGTGTTAAGTCCAACTTCAATTGGGGTTGGGGGAAGCACACACACAAATCTACTATTTTGCAATTTAAATATACTCTTCAGGTAAAATGTGGATTTTGTTCAATTTTGTTGGCATGTGCAAAGATTCAAGGAGTGACTGAGAGAACTTTGGAGTGAGGTCAGGGATGGGTGGTTAGCCAAGACTTGTAACTTCCAGGGAGAATGAGAAGTTGTAAAAGTCAGACTGGCTGTCTCTCTTTCTCTCTTCCTCTTTCTTTCTTTCTTTCTTTCCTTTTGCTCACAACAGGATTACTTAGTGTTTCAAAAGTGGGAGAGAGCCTCCTTAAATGGTTTACAGCCCTTTGAATGTATTTGGTGCAGTGACATCCCCTGAAACTTCAGTCTGCAAAGTCTCAACATGGTAACTTTGTTCTTTTCTTTTTTAAAGGCAGATGCTGCTTTTAGTGTCCCTTTATTTATTCCAGGAAAAATGTGGACATCAGCTAGGCACGCCTAGCAAAGAAAGTGGAGGCTGCTGGTTTCTGTGCTTTAACTTTCCATAGATTTTAAATGGATAAACTGCTTGCCCTTCTTTCATCAGAATATGAGCTTTCCCCAGATGGAAAGTCTTTTCTAAAGCAAAGTTGCACATGGGAGCTCTAGCTTGGAAACAATTTGCTCTTTTTTCCCCAGTCTCTGCCATAAACACTTGAATGTGCACACAACTGCAGAGCTTAATGCCACAACCTCCAGGAGATTGGGGGGAGGGGAAAGCTGCCCAGGATGGGGGTGGGAAAGCGAAGGAAGATGGAGAAATGGCTGCAGTTTGCTGCCCATCAGCTTTTCTCTTTTAAGGGGCAGACATTGCAGACGTAGTTTTAAAAAAGTTCCATAAAGCATCGCCAAGGCAGCATGCCTGTGCGACACACGCAGGGCTTTGGGGGTGTGTTTTCCCCGTATTAACAGCAAGTCGTTGAAGCGTTGAGAAGGTATTATGATTTCTAATCAGGCCCAGAACAGGCCAAGTATAGGCTTTCTGAATG |
| TCONS_00250657 | XLOC_039447 | 2:42370377-42559688 | 5676 | AAATTATTTAAAGCACTAAATAAATGAAAAAGCTTTTCATTTTATATGAATATACCAAGTTGCACTTAACTTTTTAAAAATAAGAAATTTGAAAAGGAAACTTCAAATGTCAAAATATTTAACACCCTGGCTCTGCTTTCTCAATTAACTATAGCAGGGAGGCAATCAGGAGGCCTCAGCAGAACATTAAAAACCTGTATATAAAAATTCTGATTAAACAGGATTAATGAGAAGTTTCAACTATAATGTTATTTCTTAAAATATGTTTGAAGACTGCTACTAACCACAACATTATGAAATCAGATCTTTGCTTTATAGGGCTTAAAAAAAAATCTCCAACAGAGGAAAGGTCCCCTTTTTTGGGTCTCCTTTTAAAATACAGATGGCGAGACCAGCGGCCTGGCGGGCCTGCTGTCCTTGGCAGTGCCTTCTCTACCCTCTTAAATAAAATAAATAAAAATACAGAGAATACTTGGACAAAGCCCAGATGTAGGGATCCAAGTTATGGTTATACAGGTTATTAAAAGGGACAGTATGTAAATTTTAGAACTAGCCAGGCACAGTGGCTCATGCCCATAATCCCAGCATTCTGGAAGGCTGAAGCAGACGGATCACTTGAGCCCAGGAGTTCAAGAACAGCCTGGGCAACATGGCGAAACCTTGTCTCTACTAAAAATATAAAACTAGCTGGGCACAGTGGCACATTCCTATGTGCCAGCTACTCTGGGGGCTGAGATGGGAGGATCAACTGAGCCCGGGAGGTCAAGGCTGCAGTGAGCTGTGATCATTCTACAGCATTCCAGCCTGGGCAACACAGTGAGACCCTATCTCAAAAATAAAAAAGAAAATACATAGGTTTTAGAATTAAGTATGTGTCTCCACTGGAAATGCATTGGTCTTCCGTCCTTTCTGTTTATCCACACTCAACAAACTTCTTCCTAAATTCGGGAATTGCCAAGTTTGGGATACCACCTTGGTAAAAAGGAAAGAATCTGTCTGTAGTTCGATTAAAGGCTTTTGACTTTTTTCATTTGTTTCAAACTGCACACTCTCTCAGTAAATGACAATATACACCCTCTCAATAGGTGACACAATATACAGAGTCAGCAGGACACCGCTATTATATATCTTTATCGATAAATTTTAGCTATTCTTTCAGATACAATGCTCAGTTTGCACAGGTGTGAACAGATTTTAGGACTAAATGTGCCTGGAGCCAAAAGGTCAGAAAACATAATGCAAGGCTCTGAACAAAAGCACCTGCATTCAAGCCATCCTCCCACCTCAGCCTCCCAAGTAGCTGGGACTACACGTGTGCCACCACGCCTCGTTAATTTTTTGTATTTTTGGTAGAGATGGGGTTTTGCCATGTTGCCCAGGCTGATCTTGAACTCCTGAGCTCAAGCAATCCACCCACCTTGGCTTCCCAAAATGCTGGGATTATGGGCATGAGCCACCCCACCTAGCCTTTAAGTTCTTCAAAAGGTAGTTCACAAGCAAGTTAGTGAAGGTATTGTGGGGACAGGAGGCAACTGTCCTTCCTTTCCTGTTTGCTCCAAGAAAAAGCTTTCAGAAAGTTACCAAAAAGACCTTAGTGATATCTAATCTAAGCCTAAATATGTGTAAGGAAACTGAGACCCAAAGTCTCAGGGTAACAGGAAAAATTTTATCAGACAACAATGTTTAGTTTTCTAAAATCATTTCCTTTAGCAAATGGAATTTTCAGCTTCTCCCAAAGTTATGAGTTATCTAACTCATAGTGTAGAACTGTGATTCTTTAATTTTCTGTGATACAGGTCATTTTACCCCTAACTAGGTCTCATGTTTACTACTCATTTGCCCTTTCTGCTATATCACTTTGCTTCCCTTTCCTGCATGAGGTACCTCATGAAACTTCTCTTGCTTGGAATGAATCTGTATTTTATAAATGTAATTGCTAAATAATACAAAATTGTATGTACTCTATGATGAATGACCTCCTTGCTATTCCTTAATAGAGCAAGAAAGTTCCTGCCTAGAGGCTTATATACTTATATACTTTTATGAACGGCTTCCTCTGTTCATAAAATCCTTTTTACAGTTATCTACATACTTCATATTTCATTCACTTCCTTCAGGTCACCATATCAGAAATGTCTTCCCTAACTACTCTATATAAAATAGCAATTCTCTGCTCTCCTTATTCTTTCCTCATATATATCACCTTCCTGACATATGAAGTATTTATCTGTTTTGTCTATGGAGCATGAATGTAAGTTCCACACAGTTCAACACTGTAACTACTGTAACTCTGAATGCCTAGGATAGGGTCTGACAAAATAAGCACTCAGTAAATATCTGTTAAATGAATGAATGAATGTATAAAATGTATATCTGATAAAGAACAATAAAGAAACACATCAGAACTGTAACCTGTTAGAATGACAAGATTATTCAGGGTTTTTCCTTTCCCCAATTTTATAAATGAGTTCGTTTTATTTATTTTTAAATTATTTGATAAAGCATTTGGCTACAATAAATTACTGAGGGATTTTAGACAGTATATAATTCAAAATGACTTTTCAAGTATTTTTAATCTGAAGCCATTTTTGGACAGGTAGCTAACAGTCAATTACTTCTCAATTTTCTAAGATATTATAACTGTCCTTCCATTTTGATATACCTGTACAGTTAGGATATCACTGTACTGAAATGGTAAATAACAATGAATCTAATCCTAGAGCAGGGAGGCAGCACAGTAAGAGGAAGACTTGGATTTAGTGATTGATGACTTCCTTTTTCCTCAAAATAAGCAGATTTCTTTCCAGTAGAGATCTGAGTCATTCAGTTTCTCAACATGACCAGGTAATTATGTGTTAAATCTAAACAGGCCTAGTTTGAAGTTCTACAAGAGAAAAATTAAATTTAAGATTATTCAAGTCTGAAAAAAACATTTTGAGGACATTCAGATTCTCCTCCAGAAATAATGAGATCATGTGACACTTATTTTCCATCTCTAAAAAATGTAGGCCAGGTGCGGCGGCTCACAGCTATAATCCTAACGCTTTGGGAGGTAGAGATGGGAGGACTGCTTGAGGCTAAAAGTTTGAGACACGCCTGGGAAACACAGTGACACCCTGCCTCTATAAAGTAATACAAAAATTAGCTGGGTGTTGTGGTATGTGCCTGTAGTCTCAGCTACTTGGAAGGCTGAGGCAGGAGGGTCACTCAAGCTCGGAGTTCAAGGCTGCAGTGAGTTATGATCGTGCACTGAACTCCAGCCTCGGTGGCAGAGTGAGACCCTGTCTCTAAATAAATAAATAATAAATTTGAAATGAAATAAATAGTTGGTCCCTTGGTTTCCATGGGACACTGGTTCTAGGATCTCCTGCAGAGAGCAAAATCTGTGGATGCTCAAGTCCTTGATATAAAAGGTATAGTATTTCCATGTAATCTATGACTATCTTCCTGTATACTTTAAATCATCTTTAGATTACTTATTAGTTGTTATATTGTATTGTTTAGGGAATTATGACAAAAAAAAGTTTATACATGTTCACCACAGATGGAACTTTGTTTTCCTTTAATATTTCGAATGCAGGTCGGTTGAATCCAGGAATGTGAAATCCGCAGATATGGAAGGCCAGTTGTACTTGATAACTATTTCAAGGATGACCTTAATGGCAGTATCATTTTGTTTATTAGAAAATTTGTCAAATTGTTATCTATTTTCCACAATAAGCAATTTTATACATGGTGCCTGAAGTCCCCCAACTTAGCTTGGAAAATTTTTTAAAATCAGTAACTCACCAAAGTGAATATTATTGTACTACAACCTAACTGCTACCTCTAACAATAGATAGTCCTACATGGAACTTATTCAAATTTTAAGTTGACATGCTAGGACTTTATCTCTGCTGTATCTGGAGCACAACCCAGCAGAACTAGGGGAGAGAGTAATGAAAAAAAGTTTAGGTTTCAGGGTATAAACATATAGGTCAGTAAGAGCCTCTTTTTAGTGGCATAACCTGCCCTTCCTCTCACACCTAACCTCAGAGATTGCCCTGCGTACATCTCATTTCACTTTCTATTGCTTTCAACAACCAGTTTCCTGACTTCTGCCTAAGTGGTGACTGGAATATGCAGCTTTCTAGCTTTTCTCCTACTCTGCTCTGTCTGAAGGACACAGGCCTTTCAGGTAAAGTATTCTCTGTTACCACTCACCTAAATGTACCATATGTAAATAGGCTTCTTCTCAAATCAAAGCAGATGATTTGGAACAAGCCACAGCTATCATTGTCAAAAAGAGGCTAAATTAATGTCATATTTTAAAAAGAATGTCAAAAAATGACAAATATTAGCATTAATAGCTGAAATACTAGAAAATGTGTTGTGAATATGCCATGCAAAATGAATACCACACTTCTAAAATAGCTATACAACTTACAGTCAATGACTCTCACCTATTTAATAATTATCTTTTCATCTGATAATACAAATCTGAGTGCAAGGTTTTACTGCCAAATTCATATATTAATAACTAAAACTTACCTGGTATTATATGTCAGGTACTGGGTACACTTTATTACTATAATTTTTACAGTAACCCTTTAATGGCTTATTATTATCTCAGTTACAGATGAGAAAACAAAGACTTAGGGAGGTTGAAGTAACCTGCTCAATGTCACTATAGCTAAGTCAATGGTAAAACCACTCTCTGGACTCCAAAATCCATGTGTTTAAACATCTACATGACATTGTTTGCTATACATCTCTACATGTAGGTTAAGTTTTATAGACAACTCAAATGCAATTGTCCAAAGCCAAACTCCTTTTCCACACATCTCCTTCTCCTCAAATGTTCCCTATTTCAGTAGATGCCACTATATTTCAATTTATATTTCATATATATTATTTCATCCTTCAGTAGTCATGTGAAATAAGCTTTATAGTTACTATATTTAGAGTAGAAAACCACTCAGAGACATTGTCATTCAGCCTAGGTCATAAGGCTATTATGCATAAGAGCCAGGACCAACCACTAAACACAGTTATTCCCCATTCACTGCTCTTCCTATCACATACCGCCGACTCTATTTAAAAAAAAAAAAAAAAGTTTTCGGACCAGAAGTGGTGGCTCACGCCTGTAATCCCAACACTTTGGGAGGCTGAGGCAGGAGGACTGCTTGAGCCCAGGAGTTTGAGACCAACCTAGGCAACAAAGTGAGACCCCATCTCTATGATAAATACAAAAATCAGCCAGGTATGTGGTGCGCGCCTGTAGTCCCAGCTACTTGGGAGGCTTCAGTGAGAGGACTGCTTGAGCCCAGGAGGCCAAGGCTGCAGTGAGCCAAGGCAGTGACTGCACTCCAGCCGGGGCAACAGAGCAAGACCCTCTCTCTTAAAAGTTTTGATATATAATGTATTAAGAATTATCTTCATAAATAAAATTTCATTTTTCCCTTTAAAGTATCTCAAACATTACTTAATCTATGTTGTATTATAAAGAAGGGAGAAAGTAAGACCTACTAAAGAAGAATGCCAGCAAAATTCAACTTCATTTAGAATGTCTATGTAAAAACAAATGACCTAAAGACTATTACAAATATTTCTTTCTTTTCTTTTTGGAACGAAAGAAGTAAAAATCCACAGAAATCAAGTTAAATCTCTAAAAAAAGCTTTAACCACGTTGCAGCT |
| TCONS_00261293 | XLOC_041225 | 2:218647052-218655111 | 597 | CGACGTGTTTTCCTGGGCTTTACTCTTTGCTTCCGTTAGTCACTTTGGCCAAGGTTTCTCCTGCGTAGACGTCAGGATGGCGAGGACAGAGGCCAGGAAGGAAGGAGATGTGTCCCAGAAAGCTGAAGCCCCCTCCTGGGGCAGCCTTTTGGAAGGAGCTTCTGATACCTAACCTGGATCATTCCTGCTGCAGTATCAGCAGGTGTCAGCCGGGGAAGGAGAAGCCTTCTGTGAATGACAGTCCTTCAGATGACTAAAAACAGCTGAACTCTATCCCAAGCAGATATAAGAGAGGTGGAGATCAGGGTCTTGCTCTATCATCAAGACTGGAGTGCAGTAGTGTGATCATAGTTCACTGCAGCCTCAAACTCCTGGGCTCAAGCGATCCTCCCGACTCACAACCTCCTGGAATTTTTTGATGGTAAGAATAGTTGGCTATTTTTTTCATTTGAAATTTTGCATGTGGACCTCTATTTCTTGTTCATTCAACTCTATATACTCTTTCTTGATTTCTTTTGAAATTATGTATCAAAAACCAGGCATTGATTTTTCCTTTTACCTCTTTTTATCCCCTCCACCTGCATTCTTGAATTGGCT |
| TCONS_00269531 | XLOC_043246 | 20:1868734-1874773 | 1067 | AAGAAGGAAGTCCTTTGAGATACATTATCTCACTGAAGCCTCAGCAACTCCGCGGTGTTCCCAGAGGTGAGGAAACACACTGAGAGACAGAACACGACTTGACCAGGGCCACCCTGTGGGGCACGCTGGCACCTGCACAGCCCAGCTTCACCTGGTTCCAGCCCTGCCCGCGCTCTGCTCCCCACTTCCCGTAACCCTGGGCTGGCGTCAGCAGGCAGGCCTGCCAGGAGGCTGGAGCTGCCAACGACCTATTTTTCTGGGCAAGAAGAGCCATTTGGAGTTAGAGGTCTCAGCTGTGAAGCCAGAACAATAAAAATAAAAACAGCACGGACTCCTGGGCAGCCTGGACCAGGGAACCAACTGCCCCAAGAGTTGCTGCTCACCAGGCTGGAAGGCAAGTGGGGTTGGGGGGATGGGAGATGGGAGTGACCTTACCGAGCCCCTGCTATGTCCTCCGGCCCTTACAGAGTAAGGGTAATCTCCAAGGTTCACAACAGGCCCTTTGTCTGGGTGGCCAGACCAGTCAGGATTTGAACTCAGTTTTCCAAACAGTAACAATTCCCATCTGTTCAGCAGCTACTATGCTTTACAGACTTGTGACATTCATACCACACCTGGGGGGGTGAGCTAATCATTCCCTCATTCTACAGATGAGGCAGCTGAGACTTCAGGAGGCCTCTGCTCACACGCCACCTCCTTGAGAGGCCTTGCCAGACCACCCTGTTAAAGTAGTCACCCTCACGCCTGCCCAATATGCCCTACCCTCTTCCCTATTTTATCTTCATAGCATGCATCACGACCTGCTAATATTGTGTGTCTCCACTGCATTTTGTCTGTCTCCCTAACTAGCTCCAGGTCAGTTTATCCTAGTGGCTTGCACTCCAGCGGTCTCTCAGACTAGCCCCGTGGGGCAAGTTATTTTGATGATCTGTGCTTCCTTCGGGGTAATGATAGGACCTTACCTGAAAGGTTTCTTGTGAGGGTTAAATGAGTTAATATCGGTTAAGTGTTGGCCGCTGCCATTGTTTTGTCCCAGAGCTGTAGCTCCAGGGTCTTTAACAGTAAAC |
| TCONS_00295677 | XLOC_047687 | 3:87780551-87872117 | 1130 | ACCCGCAAGGGCGGCGCAAGACTTCCCCAGCGCGCAGTCAGCGTCGCGGCCCCGAAAGCTGGCGACAGGCGCTGCTGTCTTCCCGCCCCGTGGGGTCGCCCCTGCCCTCCCGCGCCCCGGGGCTGGGGGCGCCACCTTGCCAGCTCCGACTGCTGCAGGGAGCGCCAGGGGAGGAGTTTGGGAGAGAATGAATTGGACTGTGAAACTTTCATGAACTTCTCAAAAGAACAGGAACATGAGGAGACGAAATGGTGATGAAAACCCACAATTCAATCTACCACAGTATGGTAAGCATTCCCAGCTTTAAACCATGAAGAAAAATAAATTGACAATTAGTGAAAAAAAAAATGTGGTAAATCAAAGAACGTAATGCAAAATGGACACTGGAGGGATGAAAGTCCATATGACTCCTGCTTCCAGGAAAGGCCAGAGCCACTGATCATTGGTTCACTAATGGCCAATAGTGTTTCAAGGTGAAAGGAAGGATGGGTCCAGGAGCCTATTGGAGGAAAATAGGGTGGAGACTTGGAGATGGTGTTAAGAGAACATTTGGGTGAGTGAACATAAATCAAAGAAAAAATAAATTAAGAAAAATGCTTATAGAAAGTGAAAGGTAGACATTAAATACTAAATCAGATAAAAACCTGCAGATTTTATATTTAACCATCTTCTCAATTATAATAATGATTTGGAAAATTTAATGTTTTCTTTTATATAATTTGGCAGGGTGATAACTATCCTCAGTGGGATAACAGACTAGTTTTAACTCTTACATCTCCATGTTTCAGAGTTTATTTGAGGCAAAGTATGATTTTTAAGAACAGCTACTGCTTATTTTGCTCAGGTTGCTTATTGCCCAGCCCAGTCTGAGGGGACCATTCATAGCTTATCCATGTGATACACAACCTGCACAAGCCATACGTGTTGCCTCTGATTATATGTGTACATAAGAAATGAAACAACATAATAAATGTTACTCTTGGGAACAGCAATGGATTAAGTGCCCTAATATCTTTATTCAGGTCACTGATCTGCTGGCTCCTAGCCGGATAATATTATTCATATCAATTAGCCTCTCTGAATCCAGAGTGCTTGCTAGGAAAATGGTGACAATAATATTTACCTTCCCA |
| TCONS_00295678 | XLOC_047687 | 3:87780551-87872117 | 1052 | CGGGGCACGGGCCAGAATCCAGCAGCGGAAGGAGGGGAGAGTCTTCGAATCCATCTCTCGGTGGGATCTTGAGAGGATTCGCGGGGGGGACGGAGGAGTTTGGGAGAGAATGAATTGGACTGTGAAACTTTCATGAACTTCTCAAAAGAACAGGAACATGAGGAGACGAAATGGTGATGAAAACCCACAATTCAATCTACCACAGTATGGTAAGCATTCCCAGCTTTAAACCATGAAGAAAAATAAATTGACAATTAGTGAAAAAAAAAATGTGGTAAATCAAAGAACGTAATGCAAAATGGACACTGGAGGGATGAAAGTCCATATGACTCCTGCTTCCAGGAAAGGCCAGAGCCACTGATCATTGGTTCACTAATGGCCAATAGTGTTTCAAGGTGAAAGGAAGGATGGGTCCAGGAGCCTATTGGAGGAAAATAGGGTGGAGACTTGGAGATGGTGTTAAGAGAACATTTGGGTGAGTGAACATAAATCAAAGAAAAAATAAATTAAGAAAAATGCTTATAGAAAGTGAAAGGTAGACATTAAATACTAAATCAGATAAAAACCTGCAGATTTTATATTTAACCATCTTCTCAATTATAATAATGATTTGGAAAATTTAATGTTTTCTTTTATATAATTTGGCAGGGTGATAACTATCCTCAGTGGGATAACAGACTAGTTTTAACTCTTACATCTCCATGTTTCAGAGTTTATTTGAGGCAAAGTATGATTTTTAAGAACAGCTACTGCTTATTTTGCTCAGGTTGCTTATTGCCCAGCCCAGTCTGAGGGGACCATTCATAGCTTATCCATGTGATACACAACCTGCACAAGCCATACGTGTTGCCTCTGATTATATGTGTACATAAGAAATGAAACAACATAATAAATGTTACTCTTGGGAACAGCAATGGATTAAGTGCCCTAATATCTTTATTCAGGTCACTGATCTGCTGGCTCCTAGCCGGATAATATTATTCATATCAATTAGCCTCTCTGAATCCAGAGTGCTTGCTAGGAAAATGGTGACAATAATATTTACCTTCCCA |
| TCONS_00296517 | XLOC_047858 | 3:110607230-110994410 | 1032 | TGAACTATCAAGTTATTAAATACATTGAGTTTTAAAAATTTTTTCTTAAGAAAAATACTCTTTTTGGTGACTTATAAAATATACATCTTCTTATTTAAAGAATAAGCAATATTTTTGACCTAGTCATTGAGATAGAGTTGTAAGGCAGAAATTGCACCTTGCTGTAGAATCAGATGACCAGTGTCTCAGTTCTCTTAATTCTATCAACAGCTTTGTTGCTTCATCTGAGAAATATGAATAATGCTCTTCCTACTTACCTCACATGGTTGAGATGATAGTAGAATAAGATAATATTTTATAAACTGTGAAGCTCTTTACAAACGGCATTATTTCTTATGTGGTTTATTAATGTTTTTATGTTGGGACATAAGGTTGACTTTCAAAGAATATAGTTCTGTCTTCATAAATGCTTTGTATATGTCTTTGCTTCTCTAATTTGGCACAATTATAGCACTAGTCTTTGCATCAAAGACATTTGTGTGTCAGTTACAGCTCTGTCATGATCAAATTAGTACTATGACCATGAACAAGTACTTTATCTCAATGAGCCTCATTTTTTTCACCTAAATGGCCTATGGCACCTTGGAGCTAGAAATTTGCTGTGATTTTCGTTGGATTAGAAAAAACAATTATTTTAAATAAAAGATGATAAAATGCTCTTTCAGTATAATACTTGTGGGACTGGAGTGCTTCAGTCTTTCAAGAGTGACTAGCGTGAGCCGCCACGCCCAGCCAACAGTGACTTTTGAGAAAATCTTAATTTTGATGATGTTCAGATTATATGATAACAATGTAGTGCCATGCTTTTATCTCTGGAATGGGGGCGTGGAGGATCTATTTTTCTTAGTTGTCATTTTATTTAATCAAGACTTGATTGATTCATGAGTAAACAGAAATAAGGAACCATTGAAGTTTAATGTGGTAAGCCAAGCACAATGAAATTGCCTCGCAATTTCAGAGCACCTGGTAGCTTTCTATATAAAAGCACGATGTTTATGTGTTGGGAGCAATTCCTTTGTAAATACAAAAAAG |
| TCONS_00296917 | XLOC_047907 | 3:115521221-117716439 | 2066 | ACTGGTTCCAGTTGGTCCTTTGGTTATGGCTGCATATTCAGAGTTTAAGAGAGGATTTACCTCTAAGGTATAGCAGTCATAAAGAAACATGATAACAGGGCAATTAAAAATCTGTGACCCCAGAGCTCAAAGAAAGACAGATGAGCCAGAAGTCCTGATGATCAGCATCATGTGAGCAGATATTATATGCTATGTACTGAATTGTGTCCCTCCAAAATTCCTAGGTTGAAGCCCAGATGCCCAATGTGATGGTATTTGGAGATGAGGCTTTTGGGTGATAATTAGGTTAAAATGAGGTCACAAGGCTGAGGCTATTATGGTGGGACTAGTGCTCTTTTAAGAGGGGACACCAGAGAGTTTGCTCACTGTCTCCACACACACGCAGAAGTCATGGGAGGATCTAGGAAAGTGGTGGTCATCGACAAGCCAGAAAGAGCCCTCATCGGAACCTGAGCATGCTGGCACCTCGATCACGGACTTCTAGCCTCCAGAACTGTGAGAAAATACATCCTGCAAATTAAATCCCCCAGTTTATGGTATTTGATTATAGCCCACAGCTGATGGATACAACGTAGTAACTATTTTTTAAAATAAATGGGATTATTTAGTTATATTAAGTAGGTGGGCTTTTAGAAGTCATATATATAGCAGCCATAGTTACCACAACTAATTATGAGAAAATAGAAAATGTTTATCTCTGGTCTCTTCAGGAATCCATCCATCCATCTTCACCTAGATGACTCCAAAAGTAAGCCTGTCTAAATTCCAGAGTTACTCAAATAATCACCCCCTGCCGACTTCTGTGTCCATTATCACAGACATGACCATAAGCAATGGGCAGCTAAGTCCTCAATACTATGTGTTATCATCAGAATGACTTTTGTTCCGAGGTGAAATTCTTGAATATATAATTTGGTGCAATTTGAAGCAATTTTCCTATGTTTTGAAAAATATAAAATGTCTCCTGGATTGTTCTATGAAGACTAAATTTCTGTGACTATTTTCCCATCTGCTTTTCAAGTCTCTCATCCCCTGATCTGGATCTGTCTTCCACAGCCCAAACAGCATAAAGACTCGGCTATCAGGCCAAAAAAATTAAAGAAAAAAAGACTGATGTCATTCAAAGAGTGACATTTTAGTTTTTGTTACTAGAATACCTTAAAGAATTAGATCTGATTTGCATTGATATTTGCCAACTGAATTATTGAAGTTTTTTTTTTCTTTTTCTCTTCCCATCATCAGATTTTAACACTGCAGTCAACTGCAGACAAAGCCGCAATCTTGTGACTTCACAGAGCCTCATGGGCTTTTGAGTTGACCAACTTGAGAAAAATTTCTGACTTGATGCATGAAATGAAACGAAGGCAGGTGACACATAAAGGAAATGACAAGATCAACAATCAGGTCGTAAATGGGAGTTGGAGCCGGATGATCAAAAAGAACTTTAGAAAAATGGGAATAAAAGCAAGAGCTGATGAGTTTGAAATGAAAGCCCATCTGGGAGAGCTCTTCTAATGAACTCAGCCTACTCAAACTGTACAAAGAAAGCTGAAGAATGATTGCAGCTGCAATCTCCAACCTACATAAAGCACTAACGCTGGTAAGGTGATGAAAGTGAAGGGAGGTAACTGGTATCTGGATTTGGAAGAGAGAAGTCAAAGGCCATCACCCCCTTGTACTACTGCATTCACCATGTAAGTTCCTTCGGAAATTTCACAGCCAATCTGAATTAAAGAGACAGCTGCAGATGCTTCAGGATGAAGGTCACACTCTGAATTCTACGAAGAGCCCTATGATTCAAAAGTACCATCTCTTTAGCCTCAGAGCAGTTGTATACCACCTTCTCACTTGCTCTGTCCCTGGGCTAGTATGGCTTTGAAATTATGTTAAAGAAGAGGCATTTTCCCTCACAAAGACTCCCAAAATATGACTATTAAGTGAAAGAACAGGTAGAGGGAGGGAAAGAGCTGAATCTAAGTGGAGATTAATAAAGTGTTGTTTTGAAATTGTTCCTTTATTTTTCCTGGGTTAATTATCGCCATTTAGTCACGACTTCCTGACACAGC |
| TCONS_00299976 | XLOC_048385 | 3:158642000-158643574 | 889 | CATGAGAGAGATTGGCCTGTAGTCTTGAAATGTCTTTGTCATGTTTTGATAGAGAGGTTATGCTGACCTCTTTTCTATTGTCTTTTTGTATTGTCTGAAACAATTTGTATTTTGAGTGAGGTCATCTTCGTCTCTCAAGACCAGCCCAGTTGCCAGCTGAATACCACTGAATGAACAACCAAACTGTCACTGGAGATGAAGAGAGGGCCTTGGCCACTGTGCCAGGTGTGCCTGCTACAGTTCTTGGAAAACAGAGGCTGCTCAGTAGAGGAGGGTGATATATCTTCCTGACAAAGCTCCTGCCAGGAGACGATGTGCATAACTCAGCCCTGAGCCTTTCTATGAGCTCTGCCAAATCCGACAGACAGGTAACAAAACACTGAAAAAAAAGTAATGTCAGCCCAGCCTGGCGAGTGCCAACACCGCTCCCTTAATTACTCTACCTAGTGACAAAAGCTATTCATCAAACTCGAAATAAAGTGGTTTTAAAGTCAGAAATTTATGTGCCAGCCAGTGAGAGGCTGTAATTTTGGGGGCATTGGTTTAAAGCAACATAAAGCAAGATGAAAACAAATTGGAGAGCCAGGTAACTTTTCATTTACACAATGGCACCATCAGGTTTGTCTTTGGTTCTTTCTGATTTTCTCACCATGTCTTTCTCCCCACATTCTAGCCAAATAAAACTTTTGATCCAGGCCAAGATCCCATCCTGAAGCCAAAAGGAAGATTAATTCATTCTTGATTTACTTATTAAACATTTGTTGTATTAAATAAGTAGAGTGAAAAGAAGGCCGAGTAATCCTGGAGGAATTTATTTATTCAACAAGCATTGACTACCTACAATGTGCCAGACATCAACAAAAGGGCTAGGAAAATGGTGGTAAACAAG |
| TCONS_00305219 | XLOC_049124 | 3:39850404-40353915 | 2210 | TCCATCTATTAAACTAAAGCTCCTTAGTGAAATCTAATCTATTAATTAACCTAAGTTATTTAGCTTATTTGTGCTTAAGTTTCTCTATAAATATAATGGAGAAATAATAGTACCTACCTCGTGGTATAATTATGCATATTTAAAGAGTTAATATTTATAATGCTCTTAGAGCAGTGCCTAGCACATAGTGGTTGTTAAATAAAATTCTCTCTAATTAAAGCTTGCCCCTACAGCAGCTGGGAAACAGCCATGTTTATCCAGAAAAGAAAACCATAAGCCTCGAGAAACTGTGGTATGGGAAAGACTCTGAGAAGAGACTCTAAGAGTATACTTGCTGTGCTTAGGGTTGTCAAGAAGTGGGATGCAGGCCTCCAGCTTGAGGCCAAAGGTCTAAAATCAGCAAGTACTTAGCTGAAAACCAACCTGATAAGTTCTCCCATGTTCTCAATCAGGAAAACTGATAGTGAAGTTGGAAGCTGTAGAATAAACACTGCTAGGAGGCAATTGAATCACAAGATATGTGTGGTGGTGGCAAGGGAAGTATCCCCTTGCCCTAACTAGCTTCATATTTAATTACATCCCAAGGAACGGAAAGAATGCCCAGGCATGGTTCCCAAAGCAAGCTGATGATCTTCAAAGAACCACACAAGCTCGCTAAAGAGCCAGGGATGCCTGTCACACGTGCTGGCTAAGCTTTTACCACTTCCTTAGTGGGGAAGAATTAGATGTTAACATCAAAACCCCTCTGTACACTAATTAATATTTGTTGAATTACAATGATGTTTATGTGAATGCTAATAATCATATATGGTTTAGTTCATGGCATGGATTTAGTCATTTTCGATTAATTCTCTTATTTCTGTATTATCTAGTTAAAGAAAACCTCCAGCTCGTGTTAAAATTGGAATCTATTGTGGGGCTCTCAGCTTACCCTTGCTGTCTAGATCCTGGTCCAAGACTGGCCAGAGTAGAGGAGCTATGTTCCTTAGTAAAAGACATTGTAACAAGGTTTGTTTGGCCTGGATGTAACTCCTCAACCAAAACATATGAAAACAGTAAAGTGCTATGGACAGATGAAAAATGATTACAATGGGGATTATCTGTTGTAAGGCCTGTTCATGTCCTTGGTATGGTATGGCTGAGTGATGAGAAGCAAACCAGAGAGGTGGGCATATTCTTCCTCCAGAAGTCATCAAACATCTGAGTCACAGGTGCTTTTTATGTTTTTGGCTTTTCTCCCGCCTCAACTCATGACAAGCTGTTCAACTGTTGCCTCAATTTTAAAGAGCATTTTCTATTGATTTTTCTCCCCTAATTTAAAGGTGTTATCAATTAGGGGCTAAATGAGGAGCATTACCTATGATGGCAGTTTGTTTTCTATTTGATAGCCTTTTTATACTGGCACTTGAACAAAAGATAAACTTTCCCATTTTATTTTTTCCCAAAAACCTTAAAGCACATTTGTAGCATATCTAATACTGCAGCTTATTATATTTTCAGAAGTAGTTTTCATTGTAATGCCACTAAGATATATCAAACACTGGTGTGATTGGTGGGTATGTACTTGATTGATTATATGATAAAAAGGTGGTGCTAAGGAAATGCCTAAAGGCCTCAAGACTGGGTACAAACCTAAATACCAGAGTGTAAAGCAGTTAAATATTTGTCATTTTTTCCCTACCATGTAAATAAGCAGAGTCAGTGATGACATCTGCTAGGCTGGTGACTGTTAAAAGAAAACAGAGCTTAAGAACCCATGATTTCTTATTACCCTAATTGCTCCAAGGCCAAAAAATGTGGCCCTCTCAGTAGTGTTCCTTGGTCCATGAATCTATAGTGAGTTAATAAGAACTATGCTATTAGCCAGTGTGATGTTTTTTCAGTTGCTAAAATCTCCAGTAATTTGAAAATATGCCTTGCGGCAGACGATGACGGTTGCCAAGGCATCCACTCCCCCTTCATTCTAGCTAACATCTAGCTAAAGTGCCAGAGAGAGACATTTATTTTAAGGAATAGGCTTATGAGATTGTGGAGGCCAGCAAGTCCACACTTTGTAGGGTGGATGGCAGGCTGGAGACCCAGGGAAGAGTGGATGTTGCAGCTTGAGTTTGAAGGCAGACTGCTGGAAGAATTCCCTCATCTTTGGGAAGGGCCCTTCATGGCTGGTTAGAGGAAAATTATCCAAAGCTGCGACCTAACTGGTAAAAAAT |
| TCONS_00322506 | XLOC_052176 | 4:138331390-138335211 | 788 | AAATCAAGAGATTTACTTCAAGTTTGAAATAATTTTAAGTCAATGATGAAGAAATTCTGATTTACTTAAGTAACCAAAATATATTGAAAACTTGTTAAGGCCCATAACGAGACAGTCAAGCCATTAGTCACTGCCAGAAATCTGCACACATTCCCACATTCAGCCACTTGACCTACTATACAAAATGAATGGTTAGTGATATAATTTGACTGTGTCCCCACACAAATCTCATCTTGAATTGTAGCTCCCATAATTCCTACATGTTGTGGGAGAGACCCAGTGGTAGGTAATTGATTCATGGAGGCAGGTCTTTCTCATGATAGTGAATAAATATCTGATAAATAATAGTGAATAGTATATGATGGTTTTATAAAGGGGAGTTCCACTGCGCACGCTGTCTTGCCTGCCACGCTGCCACATAAGACATGACTTTCTCTTTCTTTGTCTTCCACCATGATTGTGAGGCCTTCCCAGCCATGTGGAACTGTAAGTCCATTAAACCTCTTTTTTTTTTTAATTTATTACCCGGTCTCAGGTAAGTCTTTATTAGCAGCATGAGAACTAACTAATAGTTAGGCCTACTCCTCACAATTCTACTCATTGAGAAGCTATTTTTCTCACTGCCTTTTAAAACCACCCCTGTATGTGACTGTAATGTAGCTACAATCCATTCTTAGCTTCTTCTTTCATGTCAGTATGTCCCAATCATAAAGTAGAAGTTGGGCATTTTCCTTCTCTGCTAGCTACTAGTATCATCCCCTGTAGGTGACAACCAGGGAAGAGGTTCT |
| TCONS_00323231 | XLOC_052329 | 4:155058951-155412930 | 1032 | AAACATCCATTTCTCCAAGTTTAATCTTCCAGATAAACTTTCATACTTCTCTTTGAAGTACTTAATAAGGAGAACTCATTCAAAGTTTAATGAGTTATTGTTCAAACTGGTGGTATAAGGTCTGACTCCATTGCAAAAAAATCATTTCACAAGGGCGGAGCTGAATCTTGTCTTGTTCACTTCTGTTTTTTCTGTTGTCCAAAACAGTGTCTGGCAAACAAATGGTGCTCATCATATATTTGTTGAATGGATTAATGAAAGTCCGCTGAGACTTCTAGAAATAGTTTGGGTCTCTCAAAAATATTTTTAAAACTCTGCTTGGCTTTTTCTTATATATCTGCATTATTATCAACATTAGCAGCTTTACAGACTAAAAGTTTAAATATCACAGAAGATTTTCTAGCACTTTGGATCTAAAGATAAAGTCCTCAGTGGGAACTGCAGGGATAAAGGATTTAGGTAAGATTCCCAGGCACAGGCCCATACAAATATGTGTGGTGTAAATCCTATAACAGAATACCAATATTATATACAGAACCTTTTCTTTGTGGCAAATTACAAAGTTAGCATTAAAAAAATCAAACTGGAGGTGAAAAAAATAACATCTATCCTTCACAGGACTGCGTGCAATTCTACTTGGAGATCTTCATAACACCTTAAGGGAAAAATCCTTTTTGAAAGAAAAACAAGTCTGGGTGGTGCTTGAAAATTCAGAAGGCAGCTAGAAACTCTGCCAATTACAACTGGTGATTGCTGAGTTCTGGAGACAGACTGGGCTTCTGCTTTCTTTTGGTGGAGGTGTCTGCTTGCAGAAAATTTATGTTCTGGGATTTACAACTTCAGGGAGACAAAGGAAACTCCAGCTCATCTCCCACATCATTGATTGAGAGGACCATTTTCTGACTGTCTGCACACGCCTCCATCCAATTGGATGGCACCTGTCCACATTGAGGGCAGATCTTCCCACTCAGTCCACTGGCTCATATACCAATGTCCTCTGGAAACACCCTCATAGACACACCTGGAACAGCC |
| TCONS_00323232 | XLOC_052329 | 4:155058951-155412930 | 561 | GTTTATGGGTGCCTTGGCCCTCTAACACATTTGAGAACCAGTGAATTAGAGTAACACTCTTGAGTTCTCTTTACCATTTAGGGTGATTGCTGAGTTCTGGAGACAGACTGGGCTTCTGCTTTCTTTTGGTGGAGGTGTCTGCTTGCAGAAAATTTATGTTCTGGGGGAGACAAAGGAAACTCCAGCTCATCTCCCACATCATTGATTGAGAGGACCATTTTCTGACTGTCTGCACACGTTTCCTATACTACCCTTTAATGCAACAATGGGATGAAGAGATGAAGACTTCTAGCAGGCTACCTCAGAAAGGTTGCTGACCAAAGGCTGTATGGACCAAAAAGTCATAACACCACCCTGGATGAAAGGACATTTACCTAAGGAATTACCCGCTCTCAATTCTTCCCAGGTGCATGTAGTATAGATTAAATAAGGTGGTTGTATGGCAACAGAGACATTATTAGAAACATTCTTCTTGAAGTTTGACAACAAAGCAGTAGATGTGTATCTACTACAGAGTTGTTAGTGAAAAAAGGGATGGGCATTTGAATTATTTCCAGTTTT |
| TCONS_00327411 | XLOC_053064 | 4:49269743-49513303 | 463 | CTCTCTTACTCCTTCTGCCCTCTCTCTTTCATATGCCTTAGGTGCATCCCACATTCTGCGTTTTTTTGGGGAAATCCTCGACAGGTGCAGGAAAATTGTGTTATTGTAACTATTTACCGCTATCTCTCTTTCACGGCTCTCCATCAGTTGTGAACATCTATTGGTTTATCCCAAGTCACTAAGCATATTTTTATTAGGTACACCTGTTTTTCCTTATACAGCTGTTTCTGGAGTATAGGGTCGCATACTCATAAACCCAGTGTAACTCAGAACCGCATCTCATATTCCAATAAACCCATCATAACGTTGAAAAATCATGAATCAAACCATCATAAGTCACGGTTTGTCCGTGGATATGGGTGTCATCAATTCCATTGTATACAGTAATGCTGTACACCATTAACAATGGCATACTGATTGGGAGTGGATATTGATAGCATTATAAAAGTCAGTTATTAGAGGG |
| TCONS_00332707 | XLOC_053992 | 4:174374163-174442111 | 2685 | TGTCGTCCATCTTTTTTAATCCAGAGCCCAGCCCTGTTTCCCCTTTTCTCATGCTATTGACTTTTTTAAAAGGCCAGGCCTTAAAAAAAAACAAAACAAACAAACAAAAAAAACCAGTCCTGGTCTTCATCACTTTTTTGTACTGTACTAAGCCTGTCTTATAGAAGGCCCCAGTTCTAGACTTTTTGATTCTTTCTTTAAAGTGGCTTAACTTGTTCCTCCATCCTCTGTATAGCCTACACACCTAAAGTCTTGACTTGATTCAGGTTACACATTTTGAAGAATACTCATAGATGAGGCTATCTCCTTCATACTGCATGGCAGCAGCCAGGCATGGTGGCTCACACCTGTAGTCTCAGCTACTCAAGAAACTGAGATGAGAGGATCATGCTTGAGCCCAGGAGTTGGAGGCTGTAGTGAGCTGTGATCATGCCACTGCCCTCCAACCTGGGTGACAGACCGAGAGGCTCTCTCACAAAAAAAATTTTTAATAAAAATTTTAAAAACATAGTGCATGGCATCAGGATCACATTGAGCCTGGTTTTCTCACTATTAGTGATGCCAAGTTTGATTCCCAAATTAAGGTAATGGCAACCACAATTCTCTTTACTATTAAGATATATTTTCCCTTTGTCAATTCGCTAGTCATCCTGGGGTGATAATTTGGTGCCATGCAAATACTGAGTTCCCTAAAGTTAGCTTTCTTTCAAAAATAACAGGTCGGCTGGGCATGGTGGCTCACGAAGTCAACTTTTACCAGATGTGTTTGTTGTTCTAAATCACAAATCTAACCAAACCATTATCTGCCATGACTGCCACTGTGTCATATAACCGCCATCGGGATGTATTCAAGCTCTTTAGCACAACAGAGTGAGGCCTCTGGGATGTGGTGGCTGCAACCCCCCACGGCCTTATTGCCTCCCAAGCCCCTCAGACCCCACTGCCCTAGCCAGATCTGCATATTTACAATTGTCCTGCACCTACGACTGAGCCCTGCCTCTTTTTCCTTATGCACAGAGTTCCCTTCTTTCACAAAGCTCCTTTCCTTTTCTCTCTGCATCTTAAACACCACTCTCATTTTTCAGGATTAATCCCAGGATTGAGGGCTCTCCTTCTCCCACCCTCCAACAGCTAGATCATCTGTTCCCTCCATGGGCACTCCTACTGTATCTTAGAGAAACTTCTCTCACATCGCCTACACCCAGGTGGCTGCAAAATTTATTGCCCAACTTAGGGTATGTTTGCAAATGATAGAGAGCTATTCGTAGATTGAGAAAAGAGATAGAAAAGAGGACTGCTCTAGGCTAATACGATGTGTGGTCAGGCCAGCCTACCATTAACACTTTCCTCCTAATTTATTTATTTGGCTGTCCCACCTTGCCAGACAGAGTTCCTAGCTGGCAGAAACCAGGTTTATTTTCTTTGGTATCTGTGTGCCATATGCCTGGCACAGTGCCTAGCATATAGTAGATACTCAACTAAAGTTTGTGGAACACATTCATGGCTAGATAGATGAATTAATCAACACATTAAGTGGGGGCTACTTTTTTAGGATAGTTTTTATTCCAACAATAGCTTTGAAGATAATGTTGCAATGGCTAACTAATTTTTCCTTAAATTGGCTAAGCATGTCTTTAAATGTTCTATGGCCAAATACTTGAGCTTATAATATAGGCAAAATTCTTTGCATGTAAATTTATTAGCATTTAATCATATAATTATTAAAATTACTGAATCATGTGATTGAATCTCACCTGCTGTGTTGGGTAATTCTGTGTCAACTTGACTGCCCCACAGGGTGCCCAGTCATTTGGTCAAACATTACCCTGGGTGTGTCTGTGAGTGTGTTTTTGGGTGAGATTAACATTCTCAGCAAAAAAGATTTCCCTGCCTAATGTGGGTGCACTTCATCCAATCAATTGGCTAGAATAAAAGACCCAAACCTCCCTCAAGTAAGAGGTAATTCCTCCTGCCTGTCTGCCTTTGAGCTGGGACATCGGATTTTCCTGCCTTTAGACTCACACTAAAACATCAGCTCTTCTTGAGCCTTGGGTCAGCCAGCTTTTAGACTGGAACTGTATCATTGGCTCTTCTGGTTCCCAGGCCTTTGGACTCAGACTACAACTACACCATCAGCTCTCCCAGGTCTCCAGCTTTCTGACTGCAGATCTGGGGACTTCTCAGACTCCACAATCACATGAGCAAATTTCTTATGATAAATCCCTTCCTATACTTTATTAGTTCTGTCTCTCTGGAGAACCCTAATACACTTGGCAAAAGAAAATCTAATTTTGTCAAGTTCATCCACGAAGTATCACAGCTTCACGTAAAAATAATGCTTGTAAAGTTATATACTGGAGATAAAACTGGTAAAGAAAATCATAAATGATAAAGGTAGACTACATGTAAACACACCTTGCATATTATTAGTTTACTCCATGGCCATATTTTAGACATTGAATTTTATTTTTCTTTGTTTTCCTTTTTAAAAGAAAAATTCTTCCATGATATATTCACTGCATAACAGCTAAAAGATTTGTGCCTCAATTAAGGAAGAAATGGTAAGAAAAAGAAGGCACCCAAGTGTTAAGAAGTCAGTATGGTTCTTGCTTTCAAAACTCATTTTCCAGCCGGGCACGGTGGCTCACGCCTGTAATCCCAGCACTTTGGGAGACCAAGGTGGGC |
| TCONS_00333080 | XLOC_054079 | 4:184683133-184687011 | 797 | CAACCACAAAACAAATCCCCTTCCAATGTTTCCACGGGAGCCAGTAAACAGCTAATGCCATGACGATGTGAGGTGGGCGGGGGCCTGGTTCCCCCCAGTGTCATGCACTACCTTCCGTTTTCTGCCGGTTGAATGTTAAATAAATCTACATGCAAATTCACAAAGAGCCCTTTCATTCTTGGGGCATACAAAAACGCAGAATTAGGCCTGAAGTTCTGAGTCCCTTCTACCTTCCATCGGCTGAATGAGCTACAGGAATTCACTTAATAGGCCTTTGGAAGGATCCTTCGTGGCAAACCCGACCGTGACCGCCACTGGGCCAGCCTCAGCGGGACCCCTCTGTCCTCCCGACTGCTCCCGTGCCCCAGCTTGTCTGAATTACGTGATGATCTGAGGCCAGTACAGAGGTCTCCCTCCTTTGGAACTAGTCTCTTGGGTTGAGTCCAATAAGCACATCATCTTCCCCAGCTCTACAGACTGGCTCCAGTTTTGAGACCTTTCAGACTTTTCCATTTTGTGATTTCTTAGCTTCGTGTGTTAGGGAAGTTTGAACTTCATTTGTATTGTCACCTTAATTAACATGGCTGGACCAGAATCCAGTAGACCACGTTAGTCAACACTGGACAAGGAGGAAGAGTCGGAGGTGCATGATCTCAGCTCTGAGGGTTATATGCATTCTCCCTGCTCATGTCCCAGAAACGCTTCATTCCTCGAGAGTTTCAGCAGAAAAAAGCCCTCATGAATCTAGGGAATGGCATTAGCTACATGAGTGTTTTTAAGTGGATTTTTGTTTCCAG |
| TCONS_00341487 | XLOC_056001 | 5:139012623-139016944 | 3698 | GGCGTGGTGGTGCATGCCTGTAATCCCAGATACTTGGGAGGCTGAGGCAGGAAAATCTCTTGAACCGGGGATGTGGAGGTTGCAGTGAACCGAGATCCGAGATCGCGCCATTGCATCCAGCCTGGGCAACAAGAGAGAAACTCTGACTCAAAAAAAAAAAAAAAGGGCGGGGGGCACTTCCTTTTGAAGTTTCAGATGTATATTGGAGGGAGCAGAATTCCTTTGTGATTTCTTCCTTAATACATTGTGTCCCTGAGGTGGTCCCTGTTCTTCCTGTCTCCTGTCAGCCCCCTGGCTCAGAGGACGGCTGAATGGAGTTGCATTTCAGTGCCCACAGATGGAGGTGATGACTGAAGTGTGTTTGCTTATGTGGGGAGTGAGATGATGGCTTTGGTGTCTGAGTGGATGCTAGTGCCTTGAGTGGCCAGCAGAGGGCAGTGGTGACCCATAGCTGTGACAACCGTGAGGCGTGTGGTCAGTGAATCTGCATGGGCACAACCTGAGAGGGGCTTTTGTTGGAGTGGGGAGATTCTTTCGGACTTAAGCTTTGTGCGTGGTATATCCAGAATCAGATGGGCCAGTGCCAAGTTCAGTCAGGTTCTCAGCCTTACAGTGAAGGAAAAGGTTAGTGACTTGTATTTCAGCCCAAAGCCTACTGGAAGTGTCAAGCTGCCAGCTCCCCTCTGCCCTCCCCGTTGCTATGGCAGCCATGTCTCTGTGTGTGAATAGGTGAACCAGGCTCCAGGTTAGGACCTCTGCCCACCTAGCTCCAGGTTACATGCAGGAAAAGATCTGTCTATTGCTGCATGTGAACAAGGAGATCCCATATTTCTAGCAGGTCACAGAGGCAGCAGTCCATTATCACTTGCCTGCCCACCTACCCTGGGCAACCAGCACATGGCTCCTTAGACCTTGAAGATGGAGGCCTGGGGACAGAAGGAGCAGAGTTGGGGGCTAGTGATAGGGCCTGGGAAATGTTCTTGTCTGTTTCAAGTTTATCTTGTATTTTGGGGCCCTGGTCTCCTCAGTCTTCCAGCCCAACAGGTGTGAGCGTCCAGGGCCACCACCCGGAAGCCAGCTGCCTCTTCATGGGGAAATCTTTGAAATTCAAGGCTTGGCCATCTGGATATGCAAATGTTCCAGATTTGCTGAGCCCACCAAGTGGCTGAGCCCCCCATGCATGGGAGAGCTTAGGCCAGCCTGTATGTGTGTGTGCAGAAGGGGACTGCACATGTGTTCAGGAGCTTGAGAGTGAGAATTGTGAGCATGTACACTCCTTAGTGTTTATGCATCAGGGTGTGATGCATAAACACGAAGGCTCTGTAGCCTTTGAAGAACAGGATCAGATCTGGGTTTGAATCACAAGACCATGGGTTTTCAGTTGGGCAATAAACTTATCTGTCTTTTGCTTTGATTTTCTCATCTAGAAAACGGGCACTTGGTCACCAGCCTGACCCATAGGCAATGCTTGGTGGAAAATGACCTTATCAAATTAAAGGGTTGTGACCGTGGGTGCTTATGGTTCAGGGAGGTAGGCCTGGACAGTGAGACATCTTTCTTGGATTCCTGTACATGCTAGAGGTTTGCCCTCCTTTGAGCTGGGCTAGCTCCTGGGACATCCAGGGACCTGGGGAAGACTGGCTGGGCCCTTTTGCAGCCTATGGCTCACATGCCCACTTGTTAAGGCCTGCAAGAGTGTGCCCACAAACAGGGTGAGCAGGCAGAATAATGGCCATGGCTAGCCAGACTGTGTGTCCTTGCCCAGTGTCTGTCTGTCCTTCCCCTTACCTTGGGGGACAAAAGGGAATCCAGTTGTCCTGCCTGGTGAATAAAAGCCTGGGGTTGGGGGAGGATTTGCCTCCAGCCACGGAGGAGGGGTATGCTGTGGAAGGAGGCCAGATCTCCCCCAGCTGTTTCCCAGCTCTGTTTGAAGGGGAAGGGAGAGGGATAAATGACTGGGTGATTGTGGCACCTACAGCCAGCATCTTTCCTCTCCACATTCTAGGTCACAGGCCCACACCTCTCTCCCTAGTCAAAGAGAGCCTCTGTGAGGGGGTTGAAGGGTGTCTTGGATCTGTGGGCAGGACTTGGGATCTGGGCACAGAGAGGTTGGGGAATTAACAAAGGTCACACAGCCAGGCAAAACTAGGGAATGTGGGGAGTCATTCTAGACAGGACCTTTAGGGGGAGCTCCCTGGCTACAAGAGATTTCCTGGAAGCCCTTGGGTGGGCCCAGGCCTGAACTGAGGAAGTGAGGGCTACAGCCCAGCTGGCCTTGCACTGGAACCACAGGAGTGGCCTTTAAGGGTGTGCTGAAGGACTGATGAATCTTGGCCCTGTTCCCACACACATGCACCACTGGGAATGGGAGTGGGGAGATTGCTGAGCTCTGGGGCCAGCCCTGTTTCCTGCTTTGGATTTGGAATGGGGAGAGCCTTTCTGGGGACTGAAACTGGTGCTTCAGCTTCTCTAGGGGGAAATGGAGAAATGGAAAGGGGGACTGACAAGGGATAGTCCTTAAGGAGTTTATTTGGGAGGCTCTGGGTCCCTTTGTAACTAGGTGGGTGACCTTTAGGAGGGAAGTGCTTTGTGTTCTACAGCTTTCTGAGAGTGGCAGGAAATGGGGCCAGTAGCAGTGCACACTAGTTGGGTTGCACCTGGTGAGAGATTAGGGGTGGTTTCCCCACCAAGGTCTCTGAGCCAGAGCTTTCAGCTGCATGAGCACAGCCTGCTCCCCCTGTGGAGGGGATTCTGGGGTGGGTGTGGTTGTATACTGGGGGAAGTGAGAATGTGGCCTCTCTGTGGGTGAGTGCAGCACCGTGAATTGTGTTTGTAACACTTGAGTTGTGTTTCCCAGGTGTATGTGATGGCAGAACTAGTTTTGCTGCTGGGGTGAATCAGGTTCCTGGAAGGGACTGGACTAACATGGAGAGAATGATGCTAAGTAGTTACAGTCATTATTATATACACATGACTTAGTAGTATAGAACCATTAGCAATGACCAAGACCACCTGTGTGTCGAGTGCTTACCATGTGCCTGGTGCTGTGCTAAGCACCTCACCTGCAGTGGCTCATTTAGTCCTGTCAGAACCCTGCAAGTTCATGCTGGTTTGCCTGGTGTTTGTTTATTGTGCCATGTTGGGTGGGGTATAATTTTATTCAAGTTGGAAGATGCAAAACAGCTTTATCCCTCTCTTAGTTACTGGGGTGCAACTTATGGCAGCATTTGCCCCTGTCATATTCTATACTTGGGCTCCTGGTCCCATCCTTTTGCCAGTATGGGCACCATTGTGTTGTACAACGTAGAGACCTAATTTGACAATGTTCTTTGAGGTAGTGGTGATGGATGATATGACTATATGACTTTTTTGCTTTGTTGTGTGACTGTTGTGCACCCAAAGTATGTAACTCCCTACTGCTGTGTGGTTGAGACCAGCTACTATATGACTCATTTTGTGTCCCGGTGATATTGTAGGTGTCTAGTGTAGGGACATCTGTTGTGGTATGGTGAACTGGTTGTGAATAGTGTGACTGTATGTTGTATCATTAGGTGTGTCTGACCCTGTTGTGTCCTGTTCTGACTTGTGTCAGAGACTGTTGTGGTGTCACTCCGTGTGGTGAGCGTGCCTCCTTTGTGGTGTGGGTGGCCTATGGTGGTGCTTCCTTTCACAAATTGTGTGTCCGTGTGACACCCCCC |
| TCONS_00347392 | XLOC_057001 | 5:54603587-54830906 | 2391 | TGATTTTAACAATGTTCTCCCACCAGGCTGAAAGTGTATATAACCAAGATGGGCAAGAGCCTTTAAATGCAACAAACTGCTGCTCACCAATTGTCATCCACAAATCTGAAAAATATCCATCTAGGAAATACAATTCTAGATTTCAAGTACATCTCTAACAGGTAGGTACTAGCTCATCACTACGTCTGTTTCTTCTTGCACTTGCACTGTCAAAATGTACAAGTCCAGATTTACATCTCTTTTAAGTTCTAGCTTATTACTTTTGATTCCTCTTTTGCATCATCAAAATACAGTTTTTTAAACTGACAACTTGATTTTGTTGAGAGGAAGGTCATCTTCTTTGCTCCATAATTGTGAAACATTTTCATATACAGACTTATAAGGACAATATATTTATTATTACAAAGATTAGAATGATCAATTCAACAGGTTTTAAAAAATTTCTTCATCATCTCTTTCCAATTTCCTTATATACACAACTGTGTATTTGACCACTTGTGGACCATATAAGGAAACTTTGGTGCACAAATAATAAAAGATGAAAGACTATTATTACAAGTCCTTTTAGCAAAATGAGATGGTCCAGGTTCTTATCATAGACGTTACATAACTAGGCCCTTTCTGTTGAATGATTACATGAATAATAATCTCATATATATATATATCCCTAGAAATATATTGTTCAGCAGAGCACAGTGGCTCCTGGCTCATTTGGGAAGCTGAAACAGGTAGATCTCTTGAGCCCAGGAGTTCAAGACTAGCCTAGCAACATGGCAAAACCCTGTCTCTACAAAGCAATACAAAAATAAGCTGAGCGTGGTGGCACACGCCTGTAGTCCCAGCTACTCAGGAGGCTGAGGTGGGAGGATCACTTAAGCCCAGGAGGTCAAGACTGCACTGAGCCATGATCTTGCCACTGCATTCCAGCCTGGGTGACAGAGCTAGACCTTGTCTCAAAATAAATAAATAAATAAATAAATAAATAAATAAATAAATAAATAAATAAAAATATTGTTCATGCACTAGTTATTATGTCTGAGAATTTACTTAGGGTCTGAGACTTTGCTTATATAATCAATCTCACCATTATCACTTTGACTACAGTGCTTTTTGTCCCTTTGTGTTTATCTTCTGATTTGAGTAATAACTGCAAAATATCTTCACTTATTTTTCTTCTTGGGTGGAAAATGAAAAATTCTGAATTTGCAACTGTGTTCAATTCAAGCTAAAAAAGAAACACTACAAAGATGATGTTTCTAGACTTCTATAATCAGGGTTCAATTGACCCATACAATAACTGTACTGTATTATTAAAAAAGTAAACTTTGCCTTTATTTTTTGCAAAGTCTTTAAAAAAGAATAAAGCCATGAACTATTATAATCTTTACTAACAGTTAAAATATTTATAAATAAAAGTCAAAAACTAAATTTGGGTCTCTAGTGTTAAGCTTAAGAGTTAAGTCAAGCAAAGAGTGCAACAATACAAACGAGGAAAGACTATTTCAAGAAGCTACAGTCTAACATTGGGGGCAGACAAGTAAGGTGATAATCACAGAACAGTGGTTTAACAGAGTGCTCTAATAATTGATTTATACAAGTGTTATGAGGAAAAAAAGGTGAGGAGCCTAAAACCAGATTGAAGAAGTTCAGAGCAAGTTTCGAAGTTCTTTGCAAAAATATGCAAGAATCGCAGGATATGGGGTGGGGGTGAAAGGTCATATGAAGCAAAAGGAAAAGCATGTGTGGGGTGTGGCAACAGACTGCTGGAGAGGGAGAGTAACAATATACTAAATTATGGAATCTATTCTAAAAGCAATAAGGAATCACTGAGGGACTTTTACCAAATAGAATGGCACAAAGGGGCTGGGTGCTGGGTGAAGTGGCTCACACCTGTAATCCCAGCAATTTGGGTGGTAAGGTGGGCGGACTGCTTAATTACAGGAGTTCAAGACCAGCCTGGGCAACATAGCAAGACCCTATCTCTACAGAAACTTAAAAAAGAAATTAGCCAGGCTTGATGGCACACACTTACAGTCCCAGGTTCTTGGGAGACTGAGGCAGGAAGATCACTTGAGCCTGGCAAGTTGAGGCTGCGGTGAGCCGAGATTGCACCACTGCACCCCAGCCTGGGCAACAGAGCAAAATCCCATCTCAAGAAGGAAAGAGGAACGACATACCAGATTTGTGCTTTGGGTTTTGAAAACTCAAGAAGGGAGGCAACGAATAATCAGGAGGGCAACTGCAGTAATTGAGGCCAAAAATAATGAGGGATACACATTAGCCAGTGGCAATGTTTAAAAAGGCAAAATGGGTGAGAGAAGGAGTCTAGGATGATGCCCCAGTTTTTGCAAATTTGGGGGAAAGTTAACAAACTTTGATATAATATTGTTA |
| TCONS_00362433 | XLOC_060024 | 6:80336210-80340792 | 351 | TTCTGTCTCTACCCCTCTACTGGAAGCACTCTCACAGAGTGTGTACAGACAAGAGAAGACCTCTCATTTACCCAAAAGAATCACCTTTCTGCAATCTCCAGTGCTACTGGACAAACAAACGAGCCCAACCCCACCGCCCACACCTCCCAAGCACCCGGCTCGCCGATCCCGCCTGCTTCAGGTAGCTGGGGTTTGCCCGGTACGCCAGCGGCCCTGAGACGATGTGTGCCCGCAGCACGATCGTGTCTGTTGGCATTTCTGGGTGTGGATGCTCCAAACCAATAAACCACAATACAGAACCCAAGCTTGGACTTTGAACCGAGCCCTTTTGCCTAGTTTGCTTTTTCCTCA |
| TCONS_00366544 | XLOC_060916 | 6:287787-288640 | 276 | CTGCCCAGTTGAATACCTGAGTTCTCAAGGCCATGCAGAACAGCCTGACCATGAGGATGGGCCCCTGTGGTATACGACCTCAACTCTTCAAAGGTCACAATTTCCAGCCTTCCAAGCAGTCTTCTAATTATGAACGTGGTTTCCTCCTTTCGCTGAAGAGATTTGCGGGGCTCAGATCTCAGCACGGATATCTGGAGAGTGTGGGGTCAGGGAAGAGCAGCAAGAGGAATGGATATCCAGATATAGGGCACACTCAACAGAGAGAGAGAGAAAGAG |
| TCONS_00368604 | XLOC_061348 | 6:26673487-26704264 | 2917 | TGAGCCTAGTGTGGTAGACACAAAAGAGATTCTGAATTAATATCTGATGAATGAATCCGCTCATTTATTTGTATTTGTTATGTGAATGAATGTTACATGAATGACCTGGTGTGGAGAAAACAGATGGCGAGACTATGTGCTAGGGTAAAGCAAGAGCTCAATTTTTTTTTTTTTTTTAATTTAGAAAAAAATCTGCTTTTCATATCTGGTTTTCCTATTTAAAACTATGTGATTTGAGGAAAATGGTTTAACTCCTCTGAGCTTTAGTGTCATCTACAAAATTTGGATAATGATACTGAGGGAAGCTGAAAAGCCGTATCAACCAACTTATACAAAAAATAATAAACATTCACTTCCATTTCTAATGCATGGTGCTGAAAAAGTCCTTGTATGTGGAATATTGTTCACCTTTAAGGAACCTGCTCTCAAGAGCTGATGAGGGACTTTTTTTAGTGCAGTTCTGTTGTCACTGGCTGTTGGGCTCATTTAGTTGGCACCAACAAATCTCTGTGAACATAAAAATAAAATAAAATAAAGATTGTGGAGGAATAGAATACAAACACACAGTAAGGTGAGATTTGCACAACAGAGTAAAGGATGTGTGCCTGATTCTTTTTGCATTCTCTTTGAATCATTTTTAGCCTTTATTCTAAGTCCCCAATTATTGTCATCCTTCTCCCAACAAGATCGTTTCTCTCCACCGCAGATATTCTGGCCAGGCTCTCTGGTTAACCATCTTGATGTCCTGAGCACTCTGTTTGTACTGAGACTCTGATTTATGTTCAAATGATGCTCTTCCATAGCAAGGCTTCCTGCTTTGCCCAAAGAGCATTCAATTTTTCAAGCAATTTAGGGCTCCTTCCTCACCCAGTATCTATGTGAAACCTTAAAGGGAAGCCTATTCTTTCCAGGAAGATAATCCTGTTGTGGTTTTAACCTCAATCTGTAAATTCGCTGGGGTAACTGGGAAAGAAGTCATAAAGATATTAAAGGATTGAGGTTTATCCACATTTACTGTGTCAGCTCCTGAGGTGAACAGCATGAGTCTTGCTGCAGCTTCAGCCCCCATCACACTTCATAGGTGAAGAAAACATCCTCCATAAACACTGTAGCATGGATAACAGAAGGAAAAGATTCTGGAGAGGTTATGCAGGAAGAATCTACAGTATTTGTCAAGACATTGGGTGGAGAGATTTGAGGGAGAGGAGACAAAGGCACTGGCAAGTCTTGAGCACAGTGTAGCAGACACAGAAGCGATTTTGAATTAGTATCTGATGAAAGCAAGAATAAATCCACTCATTTATCTGTATTTGGTAAATGAATGAATGTTACATGAGTGAGCTGGTGTGAAGAAAACAGATGATGAGACTATGTGCTAAGTGAAAGCAAGAGCTCATGATTTTTTCATTTAGAAAGAAATCTGCTTCCCATATCTGGTTTCCCTCTTTAAAGTTATGTGATCTGAGGAAAATGGTTTAACTGCTCTGAGCTTCAGTGTCATCTATAGTACTGTGGTAATAATACTTGGGGAAGCTGAGAAACTATATCGACCAACTTACATAAAAATTAATAAACAGTCAGCATAGTTTCTAGCACATAGTGCTGAAAAAGTCCTTGAACGTGGAGTATTGTTCACCTTTAAGGAAAATGTTCTGAAGGTCTAAGGAGAGAGATCAGTGCAGCTTTGTTGCCATTGGCTGATTTGCTCATTTATTTTGTAGCAACAAGCTTCTGTGATGACAAAAATGAAATAAAGTTTAAAAAGTAAAATAGATGGTGGAGAAACACAATAGGGATGTATAGTAAGGTACGATTTTCTAGGCAAAATGGATTTGTACAAAAGAATGTAGTAGTAAAGGATTTGTGCCTGATTCTTGTTGTATTATTTTTGAATCTCATTTAGCCTGTATTCTAATTTCCCAGTTGTTGTAATCCTACACCCAACAAGATTATTTCTTCGCACCATGAACATTCTGGTCAGATTCTCTGCTTAACCATCTTGACTTCCTGAGCACTCATGTTTTTACTGAGACCCTGATATATGCCCAAATGATGCCCTTCCATAGGAGGGCTTCCTGCTTTGCCCATAGAGCATTCAATTTTTCAAGCAATTTAGGGCTCTTTCCTCAACCAGGGTCTGTATGAAACCTTAAAGAGAAGCCTGTTCTTTCCAGGAAGAGAATTCCAGTGGGTTCTAACCTCAACCTATAAATCCACTAAGCAAGCTCCTACTGAACACCTATGATGCAAGCTCAATCCAAGAGGCCAGCACTCCACAGGGGGAAGGCAACCGAAGCAGTAGCTAATGCTTACTGAGCAGTTCTTATTGATCAGGTCCATCTCTAGGTGCTGTGATCCACCCAAAAATATCCCACAATCCTTATTTCCCATGTAAAGAAAGAAGATTGAAAGAAAGGGAAGCTAAATGATAGCTTCAAAGTGACAACTTCCCTGATTCTTCTACTGAAAACTGAATGTGTCACCTCCACACTGCCGAGTCCTTTACTGCCTAATGAGTCCCTCCCAGTAGATATTATCACATGACTTCTTGTTTATTTTTCTTCTTTGCTTCCTGTCTGTTTCTCCCCACTCCTTGCAACTATGACGTAGTATCACAAAGGTGAGAATATCTGTGTTTTATTCACTGTGAATTACTGTACCCAAAACAGTCTCTTAACAAGGTATGCGCTTGAGAAATATTTGTTGGATGATTAAAAGAATAAAAGAGTTCACCCACCCCACCTGATAATTATGTTTGGATGACCTTCAGAGCAGACAATTGGAAGAGAAATTTCCCCTGCTTCCCTTGTCAGCTAGAGAGGTAGACATATGACATAGCTTGTAGTTTCTTGTGTAATTTATATCTCTTCACCACGCCTTGTATTCAAACCACTAAGAAGCCAAAAGAAGGAAAAAG |
| TCONS_00370001 | XLOC_061557 | 6:32485119-32557625 | 260 | ATTTAATTTTACACTTAACGGTAATCCTGTGAGGATTACGCTATTATTAAATGCATTTGATAGATTACAAAAAGGCTTATGGTTGGTAAAAATTGACCCAAGTAGAAGAGATCGTGTTTTTATTCAGGTTTTCTGATTATAGAGTTTGAGAGTTTGACCATCATTAGTGAGTAGTGACTATATTGTGTCTGAATTATTGACACAATTTCTGATATTCATATGTACCAGGTTGTTTCTTAGAGTGGGGGCAGAGATGCAAG |
| TCONS_00372559 | XLOC_061999 | 6:77484699-78078829 | 1423 | GTTTTAGAAGATACAAGTTTTAGAAGACCAAAGAATGGGAATATTTCAGGGAGAGAAAACTCTCAAAAATGTAAGATGAAGAGCTACTTAGTATTCTTGAGAAATGAACGGAAGGTAAATGAGGTTGGAGGTTAGTGAATGAAAGGGAGAGTGGCAAGATCTCACTGTGAAATAAATCTATTAGTTATTCCAGGTGTTAACTGGAATATCATGTGGGACTGGGAAAAGCATGTGTGATGTCATAATAAAGGATGGGTATTTTATTCTAAATGCTAAGGTAAGACATTACAGTTTTTGTTTTAGGTATGAGCCTTGCAAGAAGACATACATATTTTGCTGATTGCCAAGGGGATAATGCATTGGGTATAAGAAGAAGGAAAGTAGAGGAACCAATTAAGAAATATTTACTACAATTAAGAAGAGATGATAATAACTTCGACCAAGGTGGAGGCTATGAAGATGGAGCAATGCGAATACATGGAGACATGTTTTTGATGTAGACTCAGCAAGAAATTCTAATATATTAGATTTTATGTTTTGGGAGAAAAAGAGACATCTCCAAGATTATGGCTTGAATAGATTGGGACTAATAGTGAAACTTGAGAGTGATCACATATGGAGATGAAAGATTGAAAGACCTCTCGCTGAACATAATATAGAAGGTCTAAAATACTCTCAAGTCCCCTCCATCTCAAAATGACAGCAGTAACAGTGAAAACTAAACATAGCTGTACCAAGGGCCTGTGTATCTTACTTCGCCCTCCTTGTGAGTTGCCACTTCCTGTTCATCCTCCTATCAACGTGATATAAACACCAAAATAGACCAAAGTAATTATCTGGGGAATGTCCAGAGGGTGTTTACCTTCAGAAAATTAACAGCTTTGAGACTAAATCGATGACCCAGCAAGAAGGTTCTCATCAGTGGCTGACCAGATGCCAGAAACATGCCATTGGAGTGCCCAGCCTTCAGAACAGTGAGCCAAACCAATTTCTGTTCATTATAAATTACCCAGTCTCAGCTATGCAGTTATAGCAGCACAAAGCAGGCAAGACACCAGTTATCTTTTAATATTTTAAGGTGACACTAATCAATTTTTTTCAAATATATAATATTGTTTCTTTTTTTTTTCTGGGGAAATGAATAGTTTAAGAAGTTTCCAATGGGCCTTCCCCACTATAATACCTCTTACCACACAAACCAACAAATCAATGTTGGGATTCTGCCAACTACCAAGTCTCTTTATTCAGGTTATATTTAGAAATCAGGAACATGCCCACTGGACAGTTCATAGATCCATTAGATCCATAGTGAACCAGACATGTTCCAGAACTTCATTAATAATGTCACTCTAACAAGAGGAAAATGGTGGTGCTTTGGGTCCACAGATATCAATGCCAATTCAGATCCATATCCAATAATCCCCAAAAGGTGTGGCTACGTCCTTTCCTTCAAATGTCCTTATTTACTACGTAATTGTCAGTTATTTTCAGAAAG |
| TCONS_00372622 | XLOC_062035 | 6:81239427-81258371 | 2291 | CTCACCGTAAAGGAAACTATGTTGCTGCCATTTGACGTCAAAGCGCATCGATAACTGATTCAGTAATTGGCAACTACTCCTCTATCAATGTGTATGCACATGGAGACTTGGACTGTCAGATAAGGGCAGAACGCCAACAACCAAGGCAAGAAGAATGTGAAAAAGGATTCAGTATGTTCAAGAACCCCAAGCCTGGTAACTTCCTTAGTGTACACCATTATTTACATAAACATCAATAAATTCAGAAGATTAAAGATTTGAAGCAATAGTAAAAATGACCATTGTTAAATATGCCTATTAAATTAAAAATAGTTATAACATTATTGAAGTTTTTACCTAAAAACATAACAGGAAGTCATTCTAGAACTTTCTAACATAGATACCATTGTAAAGTTCAGACATAAGATCGCTGCTTTAAATTTTCACTGAAAACTCAATACGTGAAAGCTGGTTGCAATCACTTTAATGTTTTCCAGGATTAAAAAATAATTACTAGTACAAAAAAAAACTACATGTGCTTATAAAGTGTCAACATTTAATATTTCTTAATTATTTAAGACATCAGTAGCAAGTAGGATTATGCAATGCCAGGATATAAATGGCTCAGCTACTCTTTGGTGTATTTTAAACCTATCTCCCATTGTTTGATTAAAAGACATGTTATTATCTAAAAGTCACATGTAGAGGTCTTAAATCATTGTATCTACAACATCAAAGAATAAGATGTTTATTACTGAAGAAGTCATTTAATTGTATACATCCCAAGACATGAAGTTTCCAGCTAGAGTTGTCTAGTCCATCACACTGCTTCAAAGAGCACAGAAGCTCAATATCTAATTGGGAATGGAGGAGGATGAACAGCAATGTGTTTGGCTAGATGCCACATCAGGAAGCTAGTGTAGTTTTGAAGTTACCTATATCCTTCAAACAACATTCACTAAATAGTAACTGAGCATCTACTATATCCCAAAGACTGAAATAAGCTGAAACTAAATATATATATGGGGAATGTAAATTTTCAGTTAGTTGGGACTGGCTCTGTCACTTACAATCCTAGTGGCCTCAGATAATTTAGCTTCTTGGGGACCTGATTTGCACTTCATAAACACTGTTAATAATACCTACTAAGGAGTGTTGTTGTAAGGGTGAAATTATTGATATAAGTATTATCAAAACAAACCCTCAAAAATGGTTTCATCTATTTAAAAACTGTGCTTGACCATGAGCCCAACAAGAATCAGACTCAGCATTACATTTGAGTGCCCCCGTGATTTCTCCAGAACAACACACTGAGTAAGACCCACACTAAAATTGTTTTCAGAATCGGAGATGAGAAAGTGACCACATCAAAATGGAGAGAAAAGTAAAAGGTGAGTGAGAGAGAGAAAGGCCAGACATTTTCTTGTGTTCTATCCTGTGCCATTTCAGAGCAGAATACTATGCCTCTAACTGTAGATTATTCTCATCTGTAAAATCTGGAAGGAGAAATGGCAGCCACCTTTCAAAGTCTATTCACATGCTGTGGTAAAATATATGTATCTCTGTGGGACTGACTGCAGCCTTTATTAATGTGCTCAGATTTCTCCTCGGAGTAAATGTTTATTAATACATAAAAACCTGTTGAAAGCTCGTAATTATCCACATATATTGCTCACACTTTGTAGACCATTCACAGAATATTCAGGCTGGATTTGCTCCAGCAACTTACCACATATATGGCTAACCAACAACTGGTGTGTTCTCAAGATGCCCAGATTTCAACATCAGCATAAGGCAAAACAAGCTAAAATGAGTTTTACAAAATCAAAGAAAAATTATTTGAGAATTATCCATTGATTGTATTTATCTATGCCGGTAAACTCTTCCCTTATTTGGACAATTAAGAGTTGTCATTGTTTTGCTTTGTTTTTTCTCTCTAATGTCGAATGCAGATAACAAAACTTACTTCAAAAACTGAAATTTAGAGATGGCCTATTTGGTTTTCTGATACCCTAATAGAGTTCTTTTCCCTTTTGGACCTCTTCAGATTGTATGTAAATATGTGTGTGCAAATGCCTGTCGGTAGGTGAGCCTATATAACATTTCAAAAGCTTTTCTTAGTCTCTAAGTTCATTAGTTTAAAAATAATTAAAAACTACTACTTATTATTTATCCCAAGGTTTTAGTGCCTTCTTTTTTGGTACTTGATTTCCAGGATGAATGTAATGAAGTTTTTCATTTTGTTTTACTAGTTGTCCTCTAAGCCTATTGTATTTTCAAAACTTAATTTTAGAGAATATACAACAACAAAA |
| TCONS_00376013 | XLOC_062629 | 6:151186684-151549594 | 1005 | GCCTTACTTTACGGATGAGGACAGAGGACACTTAGGCATGAGGGTATGAGCTCAAGGACACATGGCTAGTTAGTGGTGGAGACAGGATGAAAACTGGTTCTTCACCGCCTTGCTGTGTTGGGATGAAAGATCTTCAAACCGCACACTCTCCTCCTGCATCAGAAGCCCCCTGTGTGCTGGGGCTTCTGATGCTGGCCCCCTTGACGGATCCTCAGGCCCTGAAACACTGCTCCAGGGTCTAGATCCTGGGGCTCCCGGATGACCCATTCCTTTTCCATTTCAGCATTTCCTACTGTGCTTTAATAGTGAGTGTTTCATACAAACCATGCCCATGGAGCAATATGCACCCAGTCACATGGAGCAATGCTGCACCCAGTCGCATGGAGCGATGCTGCACCCAGTCGCTTGGAGGAGACATTCAGGTTCTACTGTGCCTGCTCTCCCGAGGGTTAATGCCATATCATGTAGAACCTCCACAGGCCCTGGCCAAGAACACCTTGCATGAGATGAGGCTGCGATGTGCCAGCACCTGATGGCATCCAGGGTTTGCCTGCTTCTTCCCATGTGGCAAAAAGTTCTCAGTGTAAAAGGGACCTCCCTAAGGCCTAGAGAATAGAACTCAGCTCTCACCCTCCACTGCCTTTCAGTCGTGACTCGAGGTTTCCCTCTTCACCAGCCTCTCCTCCCTGCATGGTGTTTAGAGACTCCTGTTACTCAAATGGGGCCTGTGGGCCTGTGCATGGGCATTACCTGGGAGCCTGTTAGATATTCGGAATTTCAGAGCCCACCCCAGACCTGCTGCATTTGAATCTGCAACTGGAGCAAGTCCCCAGGGGGTTCTGATGTGAACTGCACAATGTGGCCTCAGCCCCCAACAGCTCCAGCCACCCTTCCTCACTTCACTGCCCAGCCCCTTCAGCACAGGGAAAGGGAGACTGGGGGTGGGGAGAGGGAGAGAAGGAATGGTGAGAGCGAAGGGGAGGGAAAAGCCGGTTTAACCCCTGC |
| TCONS_00376236 | XLOC_062672 | 6:156487065-156497468 | 2939 | CTAAGCCCTGCCAGGAAAATCCCTTGAGAACAGCCTCTGCTTCCTTTTGTGTGGAGCGTGGTCACACCCAGTGGCCAGTTAGGCTAATCACACGTGTATATTCCCCGGGGATACCTGAGAAAGAGCAGCCGGCCTCAGTCACTTCCTCCGGTGGATGCCAGAGGCCAATTTGGATAATAGCAGAGCCACCTTGTTCCTTTCCTTTGTTCCAAAATGTGGTGCCTGGGTAGGAAAAAGCCCCACACCATTCATGATGTTAACAATAGCAGCATTAACAGTCATTGGACTCCCACCGAGTGTGTTATTCTTTAAATTAGAACCCATGAATATAATGAGATGGATTTTCACAGGAACAAGGGCAGGCTGAAACAAAGAGATAAAGAAACTGAGGCTCAATGAACTTGTAACGCTTTAGTGTCAGAGCTCTAGAATGGGTGAAGGCCAGATTCAGACCCAGGCATCGTGACTCCCAAGTCTGCTTGTGGATCCTTGAAAGCAAGGGTGAGCCATAAGCATTGCACCTTTGAGAGAACTGGTAAGTTAGAACCGCAGGGACTTCTGAGAGCTTCCTTCATCATTTTCTGCATGCCTCCCAGTGTGCATAGTCTCTGCTCCTTCTCCCGTTAGCATGAGCCGTGTGTGTGATACAGTGTGAGCACTGGTGTGGAGGGTTCAGATCCATGTGGGTGGCCCCCACACTCTAGCCAAGTGAGCATGTAAAGATGTTTTTATGTAGCTTCATCGATAATTAACTTCCACTCTCTGCCTCATTCCATGCCTCCCCACTTGCCTTCCTCCCTCCCTCCAGCCTGGGTGCTTGGGGGCCTAGGCTGGGGACCTCACTGTGACTAGCTTAGCAATTCTCTAGCTCCAGGAGGCTGCCAGGACCCAGGCGGGAGTGCAGGAAGTTTTCAAGGTCTGTGCTCCAGGGTGTGTGATGACTTGACTGCTCCCTGAAGAGCTCGCTGCTTATAATCGCATAGTTTTTGGCATGTGCTCTCTGACAAAAGAACAGATGTTTCCTACAAGAACAAAAGAACAGGGCATAACTGTTGGCCTAACGCTTTGCCACTAATAACATTGAAAGTGGAAGCAACAAGTCCTAACGAGAAGGTCCCTACAGGATCATGAAGCCAGTGCCAGGGAATTGGAGTCAAAATGAAAGAACTCACGGCTGCTTTTACGTTTTAATAGGCAGTGTGCTGGATGTTTTTTAACCTCTTTGGATAAATAGCAACAGGCTATTCTTTCTAGCTGTGTTCATGAATTTTGTAGCTGTACAGTAATGATGGCTTCACAAGTTCCCTTACAAGATCCCAAGCCCGTGTCCATTTCAGAGACACACTGAGAGGGTTATGACAGGCTCGGCCAACCCTGCAGCATCAGCCTACAGTCCATATATGGGGGAAGCCTTAGCTAAATCGCAGCTCTCAGCCAAACTAAAAACACCAGAGCAAGTTTTTCTCTTTGTTGCTGGCTGGAACTTCAAAGCACGGAGAGCCCACACACAAAAATGAAAAACAAAGAACCCTAAAAAAGGGCCCAGCCTCAGAGCCCACCCCCAAAAGTTTAGTATGCCTCTTGTGTTAAAAACCTTTCACCCCATATGTCACATGTCACCCAGGGTTTCAGTCGCGTTCCTAGAGTCATTCCTCTGATTTTTCATCTCTGAAGAATATCTTCTTTGAGGTTGTCCTTGGCTTTCGCCCAAAGGAAAGACATTTATTTTTTCTCATTCTTTCCCCCAACCACCTACCCTGACTATTTCTTCAAACTAACAGACACAGTGAAAATATTATTTAAATGTTTTTAACTTCTTTTACCATGAACTGTTGTCACCAAAAAGGTTCAATGTTCGGGTTTAGTAAGTCATGGTTAGCAAAGAACATTCACAGCATCTGATGTCAACAGGATCTTTACAAATCTCTCCTCCTATTTCCCTTGGACTTTATTGAGAGGGATGGATACTATATCCCAATGTGGCAACTGGACATCCTCATTTATATTTGTGGTCCCAGCTTATACCTTTTTCCTGATGTTCTGTTTGCTGATTTGCATGATTCATTATATGATCACCTCTTCTTTAAGAAGGGGTTTTGAAAATATTTCTTATGATTCTAGCAATTTATATCAAATTTTATGGTGCTATCATTATAATGCGAATGTGGGAAATGCAGAACCAAAACCTTGAAGCGACTTGAAATTTTCATAAGGCAAATCCATTCATCACATATACATTTGAGTCCATGTTATTTTTCTGAAAATGTGGTTGAGCTAATGCAATTATGAAAATGTTGTTTCTTGGAAATGAAAAGGTTTTGTGTTCAGCAGGGTACATAAAGTAGGTGTAAGCACTCTCATATTTGGGCTCCAAATATGGGTTACATGTTGAGACTGAGTGCCAGTTGAGGAGCACATTAAAAAAACACCCAATCATATGATTGTGTTATTCATAGTTATACATTCTGTGTCCCAGAGACTAAATATCAACAGCAGATTCCTTCAAAGATTGGATGGGTATGAGTGACAAAGTGACGGATCTTAACATCTTGAAATGGTGGCAGAATTGAGTTAGCTGTTTTTATAAAAAAAAATAGGCCAGGACGGAAGTTAGACACATTAGTGCTGCTGAATTTGTTTTGAATCAACTCTGTGGCTCTAGGCAACCAGATTTCTCTCCATGTGTCGGTTTCCTGATCTGCAAAATGGGCATAAATGTGTTTTCTCTAGGACCTCTCTCAAAATTCTCACGAAGATAAAACAGGCCTTTATTTGGGATAGTGCTTTGAAAGTAACGCATATTACACATGTTTCTCAAGCTGTACTTAAAACAGCAGGCTGTGATTTTGAGGCAGCCACATCAGAAGGTGTCTGGAGCTCTCGGCCTCTGTGGGGCATGCTCAGAGTGAATTGAAATTTTTGGTCAGTGAATCCTGGTG |
| TCONS_00377005 | XLOC_062830 | 6:169563322-169596780 | 1745 | TTCTTCTCCAATTTGATTGAGGGGCTCTTCTAAGCCTTCAGCACCCAACTCAGTTCTTGTTGAAACACCGCCCGCCACTCTCGGCAGTCCCTGTGTTGAATGGTGGAGCAGCCAAAGTGGGTTCTGAGAGCCCGCTGCACCCCTCTGCAGACCCCCACCCACCAGCACCCTCCTCCTGGCCCTCAGAGGCCCGGCCTGTCCTGCTTCAGTGCAGTGACCCCAAAGCCTCCTCCCTCCAACGGGACACCTCCAGTAACCCCCCTTTTCCTGTGTGTTCCTTTCTCCTGGGATTTGCCCTCTCGCAGAGCATAGGCAAGCTCCAGCCTCTTCTGCTTCTGAAACCTCTCCTGGACCCTGCAGCCTCCTCCCTCTGACCCTGTCCCTGCCATACTGCTTCTGGCAGCTCCTGCAGGCGTCCCCTTGGTCATGCTTTCCAGATGTTCCCCCAACTTCTGCCCACACGGGGCTGAGGCTTCACTGGAGCTCAGGGACGCCCCACAGAGATTCCTGCTGCTTCCTCTCAAGGCCTGGGCACCTCCTGTGACTTCGGGGACAGAGTTCCTCCTGCCTCCCAGACAACCCGCTCTTTCCTGCGCAGGGCTCGGTGCCCTGCAGTTAGTACTTCTTTGTACCCCGCTGGCCTCTTTGCAGCGAGCTGCTTTCTTCAGCCTCCACTCTGCATGGCGAGTGGCTGTCGGCACAGGATGCCCACAGGCAGATCCATCTCAAGCCAACGCCAAACCCCCCTCCCCTTGGAATAAGCCCATCTTCCCACACCTTATTCCCACCCACCACTGTCAACTGGGGGATGTCAGTCACCCCAGCCTCCACCAGGCCCCACATCCTGATGACTTCATTTTGAAAATTTAAAATTTTCATATTTAAATTTTAAACTAATAACTTTGTAATTAGGGATAAAACTCAAAACCATAAAGAAAGCAAAATTAAATTATCCCAATTTTACCACCCAGAAATCACTAATGCCAATGTTCAGTAAGCATTATCACAAACCTCTCCATGAATGGGAAAGAATAAAAGAAGGAAAAACACATTTAAAAATGTGATTATACCATAAATGCTAAAATATAACGAAGTACAGAATTTTAAATGAATTTGACCAATAAAACAGGGACCTGGACTATAAATAAAGGAGAACTGTCCTTTGCAATTACAAAAGAAATGAGAGCTCCCAAAATACAGCTCTAAAGTTCGTCAAAATATTAACAAAAACGTGAGGAAGATGGAACTTTTTAAAACCCATGGTTCAGGTTTAGGTCACACTTAGGGCCCCTGGTTCCGAATGGGAAAATCAGCATCTGTGGACGCTCTTTTATCCCCTCTCTTCCCTAAGCTCAGGTTGTGTACACGTGTCCAATACATTTCCTATGATCAACATTTTTTATGTTAGTTCCATATTTAAATGGCTTCAGATGTTTTTCTGTAGTTCAATCTATTTTGACGCACTTCCTGTTTCTGACCTCTTCATTCAGGTTGTTCTCATTCGTGGCTGGATCACACCAGCAAGAAGGATTTTAAAGGACAACTCCTTGGGGCCGTCCAACACTGAAACCGCCTGACCGCTGCTGTCTTTGTGCTTGCAGAAAATCACGGTACTGAACATGCCAACCTCACGGGTTAGTTGAGAGAAGTGTGTGGGTATTCCCGGTCAAACACTCAGCCTAGGGCCAGCCGCTAGCAGCATTCCACTCTGATGACTGCAGGGACGTGGTTCACATCCATAAAACCAAAAGGTG |
| TCONS_00377021 | XLOC_062834 | 6:169702499-169705016 | 744 | CACCTGCCTTGGCCTCCCAAAGTGCTGAGATTACAGGCATAAGCCAACACACTGAGCCCTGGGTCTTGATTTTTGAAAATCCATTCAACCATTCTGTCTCTTGATTAGAGAATTTAGTCCATTCACTTTCAGTGCTATTATTGGCAGAATGCATCTTGCTCCACACCGTGCTGCCTGGAGTTATGGCAGGAGTGATGCATGTACTGCTGTGACCACGACACTGGCCCTGCACTGGGTCCTACCTGAACCCAGTGTGGTACTGGGTCTCACCTAAGGCCTATGAGGACTACTGCCTGTATACCACTGATGTTTACTCAAGGACCAAGGGCTCTTCAATCAGCAGGTGATGAATCTTGCCAGGACCGGGTCCTTCCCTTCAGAACAGTGAGTCCCCTTATGGCACAAGGTGGGTGTGAAATGCCAGCTAGGAGCTAAGGCCTGGAATTGGGGATTCCAGGAATCTGCTTGGTGCTTCATTTTACTGTAGCTAAGCTGGTACCCAAGCAACAAGACAAAGTCCTCCTTACTCTTCCCTCTCCTTTCTGTAGGCAAGATGAGTCTCTTTCCTGAGTTGCACTGCCTGGAATTGGGGGAGGGGTGATGCCAGTGCTCCCTCAGCTGCCAAAGCTGATGTCTCAATGGGTCACATCCCAAGTCCACTGCCTCTGAGCTCAGCACAGCACCAGGGGTTGCCCAAGGATTGCAGTCTTTGTGGCATTATGGCCTCTCAAATTTATTTTGGGC |
| TCONS_00378092 | XLOC_063573 | 7:1036621-1177896 | 1339 | GGCAGCTCCCTCCGCCAGCTCCCTCGGAAGGAACGTGCTGCCGACCCCTGCTGGTGAACCGGGCTCCACCGAGACCGCATTCCCTGGCTTCCCAGGCCCTCTTCCCGCTGCCAGCTCCTCCAAAGGCTAAGGAACCAGCTCCAGGTCGCTTCCCAACGCTCAGCTGGGCGGGCCTGAGACCAACTCCACGCCAGTGGCCGGAAAGCCAAGTGAAAGCTGGTGACTCTGCCGGCAGCTGCGTGTTACAGACCAGCAGAGTCCAGCCCTCAAAGCGTAGCTGGAGGAAACAAAGGCTTTCTTCTTTCCCCTCTTGCTTTCCAGCTTTCTTTTAATCAACACGTATTTTAATAATGAAAAATAATCACATACTTTAAAATAATTACTTGAACCTAAACAAAAGGACAGACACCACTCCCTCACTTGGGCAGGAGTTTTAACCTCTGCCCACAGTCACCGTAAGCCGAGCTGTCTTGGGGGTGCTGCCAGTGACCAGCGGCCTGTGTGGGGATCTGGCTGGAGGAGGGTTCACCAAGAAGGGAGAGCCAGAAGCCTCTTGACTCAACTCAAAAAGTCCAGGGTGACGCCGCGCCCACCAAAGTCGTGTGTGCCTGAGGCTCTGCGGAATTGAGACTGGGCTGAACCACAGAACAAGAGCTCCAGCAGCTCTCGGGAAACCAGCGTCCATCTGGAACCCAAACTAAAAAGCACAACTGGACCTCAGGCTGTGAAGAAGGACAAGGGCGCTCAGCACTGAAATCTGACATGAGAACAGGAACAAAGCCTGTGGAAACCCGCTTTCTCTCGAGCAATGACAGCGCGGATCCACAGGCTCACTCATGCTCCCCATCAACTAGCAAAGCTGTGGCACCACACGGGCTGCGGGCACCGGTCCTGCCCATCACAGGACACCTGGCACCCTCGGGTGGAGGGGCTCAAGGACCACCCTGTCTCCAGAACACCACGCCAGGACGGAGAAGTCCAGGGACGGCAGAACCCGTGTCCTTTGTGGACTGTGTGATGAGGGAGCCGAAAGAGGCAGCTGAGGCCACCAGACTTGGGAGCCTGCTGGAGGGGCTGGGATAGCAGGCCCTGGGCCCCTGATGGAGGGGTGCTGGTGGCTGTGGCCAGGACCTAAGGAACAACCTGGGGTGGCAGCGGGCAGGGACAAGGCTGCTTCTAGGAGGGAGAAGCAGGGGCCCGGCCCACGCCTGCTGCTGCAGCGAAGCCTCCTGCATGGGCTCACTCATGCAGGACAGCAGGAGCAGAAGAAGCCCTCACCTGACCCCATGCCCCTGTCCCCACCCCTCCCTTCCTATCCCCACCCTCCCCAGGGCCACCC |
| TCONS_00380483 | XLOC_063918 | 7:33688822-33693515 | 3503 | TGATAACAAAATTCTTAATTTTAATATATTCCAATTTATATATATTTTTCCTGAAGGAAAAATTATTTAATGCTTTTGTGATCTATTAAGAAATTTTATCCTCCTCCAAGTTGTGGAGCTATTCTTCTGTGTTTTCTTCCATAAGAGCTATTGTTTTGTGTCTTATATTTAGATCTACAAACCCTTTGGAAATGAATTTATGTACATGGTTTGGGATGGGGGTCAATATTCGCCTTTATTTCTACATAGATTTGCAATTGCTCCAGCATCTTTTATTGAAATTACCGCACTTTCTCCATTGAAATTTACTTTTGAAGCAAGTTCAAGGTCAAAATCTTTAGTAGGGAGATGACTCTCTTATGCATAGGTTTTCAGATTGTTATGCATAGGCATCACCATGGAATGTGTTTAAAATATAGATACCTAGGCCACCCCCAGGGATGCTGATTCACTGCTGATGATTCTCATGCCTTGAGGCCTGGCCCGTACTCCGAGGATTGGTGCTTCACTCAGGACCACCCTCAGTCAAGCAGACTCTGCATCTCTCTGCCTCATTCATCTATGTACAGACACTGTGTCTCCTGTAGATTATTGTGGCAGCTACAATCAGTTAACAAGTTAATTTTGGGGAACTCTATTTATCCTACCAACTCAAATATTTTGCTCAATTAATATTCTCTCATTCCATTAGTCATTCATCAGTACCTATCAGTTAGTCATTGACTTGAATTTCATGTGGGCATTCCACCACTTCACTTGCCACCCCATTCTGTTACTTAACAAAGTCTACTGCAAAGCACATCCATTGAGACAGCTTGATTGTCTCCTTGTATAGCTTGCCCCATTGTCATTTTGTCCTTCTCTTAGTATCTGCGACATTCAATTAGCCTTTATTGAACACCTACTCTTTGCCAAGCATATAATCAACTTTTTATCCTCAAGGCTATTAGAGTCCCTTGTAGAAGTGTGGGCACTGACCAACTTCCTGACACATGAGTACAGTGAACCGTGATGTATGCCATAAATGGGAGGGGTGTGTGCTTGCTCAGAGGAGGAAGCAATTACCCCTCCTTGTAGAAGGTCAGAGAAGCCTAAGCAGTGGCGGTTGAGCTGGGTCTTAAAGAGTGTATAGGAGTTCAGTGAAGGATAAGTGGATGAGGATGAGGGTATTTCAGGTAGAGGAAAAAGACATAAAACAGCTCAGCATGGTCGAGGAACTGCAGGTGATTCTGCATGTGTGCATCCCCTCAGTAACTCAACAGCCCATGTAAATTGGGAGGCAGGAGCACTGTCCCACTGAGTTTCAAACAAAAGCCATTCCAAACTGCCAGATAAAATTCCAGTTTAAATTAGTGAAATTTGTTGTGAGACAGCCTGTGCACTGCAGATGCCTGTGGTCCTAGAAGATAAAGTCTATTTCCTTTTGAAGGACATACATGTAGATCAACATGGAAGGAGTAGCCCTTGACCATCAGTGTATGACTCCATTGCATAGTGCTTGCTGCAGAATTGCCTTGCCTGTCAGATGACACAGCCAGTGCTGAGATAGTGGCTGGCTGTGTGGAGTGGGCACAGCGCTTGCTCTCATGAGCCGGTCCCTGGATCTACATCAAGATGGTGCCTGGATCTGTGGATGGACTCTGGTCCTACCTTGGCCCCTGCTGCACTGAAGCTCCTGGCATTTCCAGGGAGCCTTGCCCCTGTGTGTTATTGGCCTGTTTTTCTGATGTCTGCAGCCTGACAAACATGTCACCTGGTCTTTCTCAGCTGGGTGGCTCCTCTTTGTTGATTCAATGCCTCCTGGTCTTGCACCCACTCCCCGACTCAGATACTCTGCTTGGGCTCTTCCAGGAGATCAGTGTGCTCTGCCAGGTCCCAGGGCAGACCTGCTGGCTCTCAGCTTGGCACTGAGGAATGCTCTGGAGTAAACACTAGCCCTCCCCACCTGCTACATGCTCAGCCCTCTCCCCTCTGCCGTGTTGCCTCATGTCTCAGTCATTTCTGATTCCTCGTTACCTAGCAGAATGTCTGGCACTTTTGCTCAGTAAGATGCTTTTGAAATTGAACTGGATTGTGAATTCCTTTCAGTGAGTGGTCCATGCTTTATTTGGCAAATAGATGCCAATGACTACTATTTTCTCGAAATTTTATAAAGTTAATTATTGATACACCCAAAGCAGAGGGATCTTCTGATCCCCAAAGCCTGGCTTTCAGTGTTGTTTTAACCCTTCTAAAATCTCAAGTTTCTCTAATAAAAACCACGATAGTCTGAAATGCTGGAATTTGGAATTTATGCCTTCCTAGAGTGCTGATACCGAAATTTTAAGGAATGTAGGGAAAAAAAGGAAATAAAAAGTCCCCCAGAGGTTGCTGGAATTTTTAGTTTTATTTGAACATATTTGGTGGGAGAAAGAAATGAGAGTTTGTGATTTACTTTCTTTCTGATTTCTTCTTTGCTGTTTTTTTTTTTATTTCATCTGAGCACCTGTAGAAAAGTTTCCTTAGAGCACTCCTGTGTGGGGAAGTATCCAGTTTGAAAGCCAGGCCAAGGAGGTATCTTGACCATTTGAGCAGAAAGACCTCTGAGGAAATGAACTTTCTCCTGTTGAGTTGTGTCAGGATGGAAAGGTGTGATTACTTTCCCCACCTATCATAAGGGTCATGGCTGACACTATTATAACAAAAGACAGATTAACAAGAGAAAAGCATAACAAATTTATTGAATCAAAGTTTTAGGTGATGTGAGAGCCTTTAGAAATGAAGACCCAAAACCCCAGGGAAAATTGTTTTTTATGCTTAGGTTCCATGAAGAATGGATAGCCATGTAGAACTGTGATGGGACAAAAGGTGTGACCTCATGGCAATAGACCAAGGGGGGAACCCCAGCAAGGCCTGTCAGTTCAGATTCTTCCTGGCCTTTCTGTGTAGCATTCCTTCCCCCTGGGGATGGGGCAGGACCGAAGGGAGAAGGAAGAGAGTGACCTTGGTAGGTTTTCTGGCTTACTTTTGGGGAGAGGGGTTCTAGTTTTTATGACTCCACCTTGGGGAGGAGGAATTCTGGTTTCTGTGATTCACTTCAGAGGAGGAAGAGGGATGGGAGACAGGAGGATGGAGAAGGTCAGAGGGACCTTGCTTGTGAGACTTTTCTGATATCCTTCAGTTTGAAGTACTTAGCACACCAAAGAGCTGTCTTTGGAGTATCGTGCTCTGAGTCCCAGCATTTGTAAGGCCAGGTGGAAGAGAAGTGCTGGCTCATTAACTCACACAACTGTTTCTTGAGAGTCCTGTGTGTGTCTGGTGCTGTTTGATGCTCTGAGCAAAGGTTATCTTCAGAGAGAATGACTGTCCAAGATGCTGATGCCACTCGGGATGATGAAGAGAGGTTGCAATGGGAGAAGGATGCAAACAGCCACCAGATGTTTGCTCAGAGGCCCACACTTAGACCTCAGAAGATTGTCAAGGGGTAATCTCGTGGCACAGAAGGCAAGAGACAAGTGTGTTGG |
| TCONS_00384311 | XLOC_064540 | 7:95182781-95187039 | 922 | TTTTTGTCTCATAATTGTCTACTTGGCTCCAAAGTTAGAGACAAATAGGTGAAAATTAGGAGACAAATAGATGATTGGTAAACACCAGTCATTAAGAGGCAAATTCATTCTGCTACTCCGCTTACCACTGTACTCACTAATCTTGAGGGGACTACTGAATTGTAAATCTTCAGCCTCAGAAAGGGTTCTGTGTCTTTTCCTTTTACTCTTTCTCAGTGCCCCTTATGCATAATCCAATGGAGTATTCCAAGGAAAATATTTTTAATGACTGGGGGTTGCCTGCAATAAGTTGAGCCTGAAATCTCATTTTTCAGTTGGATACCTACTCATGTCATGGATCTGTAGTATTCTTTTTGCTTACTCCAGCAGTAGGAAATAATATAGGGACAGAACTCAAGAGAGAGAAAATGAGCAATAGGGCAATGAGGCACACTCCCATTGTCTGGTAGAAAAAAGATGCATGAGTCTTCCATATGTCAAGTAGATACTACAAAGGTACCAGGCTTGAACTATTGTGAAGCAAGTTCATCCTAGACTGTGACTTACTAAGAGAAGAGACCCCAGCAGCAAAAGCCTGTAAGGTGAGTTATGCAGGAAATAAGGAGACTGGAAGAGGTCTACAGGAGTCGATTTCCTATGAAAGGAGGTTGTGCAATGAAGAGACTGCCTGCTACATGGAGGACAGAGGTCACAACAACAACTGGCTGGAGCAGTGGAAAGAGAACTATGCACAAGGATGAGGAGAATAATTGTGATTGTGGGACAGGGCCCCAGGAGAGAGGTATAGCAGACTGGCCTTGGAAAGCCTGCAGCTGCATCAGGAAGGCAAAGCATGCTTGGAAAAAATGCTGACTGAAGTAAGGCAGAACCTAGAGGACAGCTGCTGGGTTAGTAACTAACTCCAACTTAGTTACTGGAGCTG |
| TCONS_00390240 | XLOC_065427 | 7:6880124-6910698 | 1889 | TTTATTGGGAGTAATATCATCCTCTCCCTTCCTGGATATTAGGAACAATATCACACTGTGCGTGTACGCCTGTCGCGAAATTCAATGGAATGTCATCCTGCGCCTCCCTGGATATGACGAACAATATCACAGGGGATGTACCACTTCTGAGATTTTGGGAGTGACATCATCCTCTTCCCTCTGGAAGTTAGGGACAATATCACAAGGGTAGTGTACACCCTCTGGGATGTTGGGACTAATATCATCCTCCCGCCCACTGGATATTAAAAACCATATCACAAGAGGCATGTACACACACTTCGATATTGGTATGAATACCATCCTCTCCCTCTTTGGATATTCTGTGCCATATATCAGGTGGGGCATACACCACCTGCAATATTGGAAGTAATATGAGTTTCTCCACCCCTGGATATCAGAAACAATATCACAGGGGGTTGTGAACAACCCCTGCGATATTTGGAGTAATATCATCGTCTCCCCTCACGATTATTAAGAACAATATCGTAGGGGTGGGGGATGTACACCCCCTTTCATATTTGATATCATCCTCTTTCCCCCTGGGTATTAGGAGCAATATCAGGAAGGGATGCACAGACCCTGTGACCCTTGCTGTCATAGAATTGTCTCTCCCTTAGATATTAGGAAAAAATGTCACTGGGGATGTGAACAGCCCTGCGATATTGAGAGTAGTATCATCCTCTCCCCCGTTGCATATTGGAAACAACATCACCAGTGGGGTGTACTGCCTCTGTGATATTGGGAGTGAAATTTTCCTCTTTTCCCCTGGACATTAGGAAGGGTATCAGAGGCGGATGGTGTACATTCCCTGCGATATTCAACATAACCTTATTCTCTCCCTCCCTGGGTATTCAGAACAATATTACAGGAGGGGTGTTTACCCTCTGCGATATTGAGAGTCGTATCATCCTCTTTCGCTCTGGATATTAGGAACAATATCACACGGTTGTGTACCCCCCCTGTGATATTGGGAGTCGTATAATCCTCTCCCCACCTGGATACTGGCAAAGATACCACAGCGCGGGTATACATTTGCTACCCTTTTGGGAGTAATATCATTCTTTTCCTTTTGGGATATTAGGAAGAATATCACAGGGGTGCTGTACAATTACTTTGACATTGGGAGTAATATCATCCTCTATTTTCCTGGACATTGCACACAAAAACACAAAAGGGTGTACAACCCCTGCGATATTGGGAGTAATATCATCCTCTCTCCCTGTGGATATTAGGAAGAGGATCACAGGGCTGTGGAAACCCCCGGCGGTACTGGGAGTAATACCATCCTCTCTCCCTCTGAAAATAGGAAGATTTTCACAGGGCTGTGTACACCTCCTGCGATATTGGGAGTAAGATCATCCTCTCCACCCAGGAAATGACTAACAAGGTCACAGGGGGGTGTACTCCCCCTGCGATATTGGGAGTAATGTCGTCCTCCCCAAACCTGGATGCTAGCAACGAGATCACAGAGGGGGTGTACACACCCTGCGACATTGGAAGTAATATGATCCTCTCCCCACCTGGATACTGGGAAAGATACCACAGCGCGGGGACACGTTTCCTACGCTGTTGGGAGTAATATCATTCTTTTCCTTTTTGGATATTAGGAAGAATATCACAGGGGTGCTGTACAATTACTTCGATATTGGACGTAATATCATCCTCTATTTTCCTGGATATTGGGCACAAAAACACAAAAGGGTGTACAACCCCTGCGATGTTGGGAGTAATAGCATACTCTCCTTCCCTGGATGTTAGAAAACAATATCATAAGGGCTGAACACCCCCCGCGATAATGGGAGTCATGTTTGCTCTTTCACAGGCCATTTGGAACAATATCATTCTCTCCACCTCCGGATATTAAGAAC |
| TCONS_00391717 | XLOC_065682 | 7:33898272-33899424 | 821 | CCTCACTTTCCCACTCTCCTACCAGTGTTTCCTGGGATCACCTCCATTAATGTCCTTATCTTAGTATCTGCTTCTGGTGGGACACAGACCAAGACATCATTTGTGAAAGAGATCAGTCCTTTTGCTACAAGCTCTCCTTTTCCAAAATAAGAGGTGAACTTCGATGGAGTCACTCATGTGAAAAGTAGTTACTATACATATCACATGTGCCAAGGCCCCTGCTCACTGCTTTTGCTTAGAAAGCCAGGCTCAATCCTATTCTTCATCTTCCCATAGACTAAAGAGAAGTGGGGAATAATGATGAAAAGTCAAGGCTCCAGAGTCAGAGCACCTGGGATTGGATCCCAGCCCTAACCCTTCCTAGGTGTGCAATTTTGAATAATTCATTCTCCATGTCTCCAAGTCTTCATTTCTCTGTCTGTAACATGGATAAAATAGTTGTGTCTACCGTAAGAGATTTAAATGAGATCACTTATGCAAAGCACTGAACACATCATGTGGTGCACAGCACATGCTCAATAAGTGGCAGATTCTCTTATTGACCTTCTAGTTTCAATTTAAATGCCCTCTCTTTGCGGAAGCCTTGCCTGACCTAAGAGTAAGGTTTTCTCATATGTTCCCACAAGATCCCTATTCTTCCTCTGTCATAACCCTCACTGCTCTTTATTTCAATTACGTGTTTGATGCCTGTGAACTACGATGTTTCATTGTCCAATGAGAGCAGGAACCTTTTTGTCTGCCTTGTGCTCTCATATATATAACATATGTATGCATGTGTGTGTGTGTGTGTGTGTGTGTGTGTGTGTGTGTGTGTATTTGTG |
| TCONS_00405190 | XLOC_068098 | 8:78521266-78535299 | 3045 | ATCAAACCTGGTTACATGGCACATACTACTTTGAGGAAAGGGCCTCGAAAATTGTCATATGGCCAATGTGAATTCTAGATTACTTCCTCATAAGCCTTTTTTATATGCCCATCAAAGTGCTTAGATGCTGTGGTGAGACAGCCTGCCAAACATTCTCTAGAATGAAGCTGAAATTAGCCACCCAAATGGTGCTTCTAGTCTTGATCCAGGTTTTGCAAGTCATTGGCTATAGGCAGGATTAACTAATTGAGGACTTATGTTCACTATAATGTAGAAAAACAAGGAAACAAAAAAGACACCAAACAAAAATTTAATAGCTCATATCTAGGAAAAATAAACAGAGACATCAACCTTCTTATGCCCCCATGAATTGCTGCTAACCCACTTAAGGCATTTTATGTTGGACATGTTCAACTGATATTAGAGGGAAAGAAGCATCCAGTGCTCACAGCAGGCAATTGCCCAAGCCACTGTGGTTTAGCAAGGACATCTAGCAGCTCCACCTCTCTTACAGCCCTTTAGGAAGACGCAGGGCGACAACTATAGTTTCTCTGCCCATTTTGAATTACTTAGAGAAAGTATTTTGTGAAGTATTACATTTTTTAATATTTGCTTCATATAAACCTACACTCTTCACAACTCCCAAGGATTCTTTCGGTGCCACTTCACCAGCTGAAAATCGCCAGTGGGCTCGTTCCACCCACTCGGCGGCAGGCTGCGCTCAGCTCACACTACTGGCCTGGATCCTATGCCCATTGCAGCTCTGCCCTCAGCCTGCAGCTGGTCCAGCCATGCCGCAACTGGCTTCCTCCTTGGGTGCCGACATCTAGACGAGGGGGATGCGATGGCGTCCGAAAACATGGAGAAGCCAGCAAACGCAGAGCCCCAAGGAGTGTTACAGCTTTTGCTTGGAGAGTCCAGAGGTCTGAGCCCCCAGGAAGTGTTACAGTTCTTGTTTGTTCCTGCCACCCTTAGCTCAGCAAACGGGGGCCTGTGGTGTCCAGCGGTTTTTTCACTCCTGTTGCTCCCCAGCAGAAACGCGTGTTACAGCTCTTTTCACACCTGTCATCCAGTGGGTGTTGGGTTATTATCCTGCGACCAACAAGAATGAGGTACACAGACACTGGAAAGTGAGTGAGGTAGAGAAGAATTTTACTGAGCGACAGAAAAGCTCTCCACGATGAGAGGGGACCCAAAGTAGGTAACCCTCTTTGTGAGAGGAAGCCCCAAAACGAGTAGTCATTTGTGAGGCTGAGTCCAGGGTTTTTATGGGATCAGAATAGGGGCATGTGTGCTGTGTGGTCCCTGGGTGGGCCTGGAAAAAGCACCATTCGATTGGCTAAAAGGCATGGAGAAAGTTCTCCCTCCGGCGGTGGACTCTACCCCGAAAAGGCAGCTCGGTTTTCAGGCTTCGGGCTGTCTTTGGCTTGAAGGTCGGGTTTCATCAGGGACCCATCCCTGTCTGGCTAGGAATTTGTCTGTCTTCTGCTGCTATCACATTCGTATACACCACCTACCAATAGTCTTTTCTACTAGCCAATGAAGCAATTAAAGCTCCAACCATACCGTAATAAATGCTAAAAATTATTGAATGCTTACGGCATGCCTGACCCTCTTTGAGAGGTTTAGTCTTCCTAACTACCCTATCATCAGATACTATTATTATATCTGTATTAAAACTAGGACACTGAGGCACAAAAGTTAAGAACAAACCCCCAGATAAGACAGTTAGAAAGAAGAGCAAGGATTCAATAACTGAATTTTGAGGAGTTAAGAAGGGAAAGTAGAGATTGATTCTTTGCATCTTCGTTTTCTAAACATATGAAAGCATATGGAGGTAAGATCATAACATTTTTAGGACCCCTTCCATATTGATGCTCTTAAGAAATTACAGTGTCATCCTATTATAGATGCTAGAAAGTAGTTTTGTAGCTGTTGGCATGTTCAGATGCTTCTGTACTTAAACAAATTCTAAGGTAGACTTAAAAACTTAGAATCCTCTGGATATATCAGAATAGCTACCACACTGGACGGTTATCTTAACCAACATATTCATTTCCCCTTGTGATATTTTCGAAGAAGTCTCATGAATTTAGAAGAATATGTCAGGAAAATATCGGGTTTTCACAACATCTTTTTAAAAAGTTTACATCAGAGAACCCCATATATACACAGAGTTGCCCAAGGGGGAATATCCCATTATTCAGATAAACACTGCATTGAACCACTGCATTGCTGATTACAAGATCTAAAATACATTCTAAGAAATACGTTCCAGGAAAATAAATATATCTTTATATAAAATAAGTCCCAAAACTCCTAGCCACACACCCCTCATATATACACACTAGATTTGGGGGTAAACTTTTACAAAAAGAGGGATAGATTTGGTGGAAGGTAGGATGATTAAAGAAAGAAAAGTCTCAGGGCCATGAATGAGTGGAAGTTAAGGATATCAAGGAGCAGAGGACCAAATTTGTTGTTACATTATTTGGTCCACACTATCCAATCTGCAACCTTTGGGAACAAGTGTTAGAAATCAATATTTCACATTTTAAAGTGAAAATACTGCAATAGAAAAAAGAATACCACAACAGAGTCTGGGGCAGCACCTTCTGATCAAACACATCAGTATTTTTACAGCAAGTGGGATAAGGATGAGTGAGGGAAAGTTGATTTTGCTCCTAAATATGTTGTCTCCAAACTTTTTAATTTTTTAGATTGTCAGGCTTTATTTGAGAATTGTGGATAAAGATTTAAAAATAACAACATTTGATAACAATTATTCATTTAGATTTCTTCTACTCCTTTTATCATGAATTACACTGTTTCTCATTGCCCAAGCTCTAATAAATGGATCTATATATTGTTCTCATCTCTGAGAATCTTATAGAATTCCATTCTCTTTTTGTCTTTTCAGAACAAACTATCCTCACCACTGTATAGCTAGAGACCTAGCTGTTCTAAATTAAAAGGTGTCATTTAAAGAAGCAGTTTTTATTTTCTTAATGCCCTAATAATAGTTGAATAATAAAAGGAGTCTAG |
| TCONS_00405192 | XLOC_068099 | 8:78551858-78566696 | 2263 | ATAAATAGAATGCATTGTTGAACATTATTGGCTAGCTTCTCCTACGATTTCATTCACTGGATGGCAAGAACATTATCTTGGACAGAGAAGCTTAAACACTTTTACATCTATAGGAACAAGGTACTGCCAAGAACACTCGGGTATCTTTCTGTTTTTATTAGCCTGGCTTCTCTAACAAGTCCCATAAATTCTGTGCCTTTCCAGGGCCACAAAGAACTGGGAAATAGATTATTTTCAGGGTCCATGTATCTTTATGCAGGCTTTCATGGAGCAGCTGGACAGTGATTCTTGAACCAGGCTCATAGTGTAATACTAGGAGAGATGATATAATAAAGAGTCAATTTACTATTCAGTTTATAGCCGTCAGTAAATTAGACCTATTTTCTGGGGATAAAACTGATTGTTTTGCAAGCCAAATATCTTCCCCCGGCAGGTTGGTATATGTGAGACTTCTTTGTGTTTTGAAGAGAGTGTGGTTGCTTCTTTTGTAAGCAATATTTATTACATATACATTCAAGCTGGGTTTTGTTCTGTTTTTTTTTTTTTGAAGAGGATATATTAATAACTGCTAGTTCTAGACAGTTTGTTCATCCACTGTTTTGAGTAATGTAACAACAACTGTATAGAATTCTAATATATAAGGCCAAGTCTAATGAAAATCCTGTCTAATATTCTTTGTGAGAAAGCCTTTGCAAGTGCCCCCAAATTACATTTTGAGGGCTTTGCTGTTTTTTTTGTTTTTTGTTTTTTTTTTGTTTTGTTTTTTGTTGTTGTTGATGTTGTTGTTAAAATAGAAGTCAGAGGATTTTTCTTACCAACTTTGCCCTTTACATTGCTTCATGGTTATTTCTTAAAGAATTAAATGGATTCTGTATTATAGAGCCCAAAGTCCTTTGAAAGTAAGGGTAGAATAAGAGAACTGAAGGACGAAAAGGGGAAAGGGAGAGGAGAGGAAGTAAAAAAGCTCAGACTAGTGCATCTGTAGGTGCTTCATAGCCAGAATAATCTTTTCTAATGTTGAGCTACATATTTTTAGAAACATAGTAAAATTTATCTGGAATATAGTATCGACTAGCTCAAAGATAGGGATGACTCTTGGCCCATTTTGCTGCTTAGATCTCAAGGATAAGTAACAATGTAAGTATTATCAATACACTGAGAATACAATAAATGGGAATTTCAGTAACTCTGTATAGTCTTAGATTAGAATCCTGCATTAAGAAGGTCTTGCTCACCACTTTTCATTCTTCCAGTTCCAAAAGACTCAACTAGATGCCATGCTTGCCTGTCTCCATGCACTAATGAGAGGATCTCCTAAGGTTCCCGACGTTCTTCCTGCCCTGCCTGTTTTAAGGTGTTTTTGTTTTATTTTCTCTCTTACTTGGGATTAAACTCTCATCAATGATGTTTCCTGAAATGATAAGGAGGACCCAAACTGCAAATCCAGCCCTTGGCATGATTTTCATTTAGATTATCTGTAGGTTGGTGTTTTATTGATATTTTCAGGGGCTTCCTGATATGATTTTCTACTCTGGGGAAAATTGGCTGTGGGGATACTATGAGAAATTTTTTATGAAAATGAAAATTCATAAAAATAAATATTTTAAAATTATTTTTCTGTGTGTATATCCGCTGAGGTTACTGGTCTTTCACACCCACATGAAAGGCCCATGAGAGGCTTTCCTGCAAACAGAAAATGAATCAGTTGGGGTAGAAGATAGATAGCATTTCAGATTTAGTAACAATTGTGTGGACAGAAAAATATTAAGGAAAATAGAAAAAAAATCTTTCCTGATGAAATCTAAACAGGCAGAAATAAGACAAAAAGAAATACAATGGTTTTCCATATGTCCTGAATGAAAGAAGAGTATTTGTCCTGATAGAGTTGAAATAGTATGGAGGCTATTTGACAGATGAATTGACAGAATTTCATCACCTAAATCTACTTTATAAAGTGAAAGGACTAGAGAGAAAATGCAGGTGATGGAATTTCAGTGTGATGACAGGAAACACGCACTACGATCAGTGTTAAGTACCAACCATCCATTTCTGTGTTTTGTGTTGTCTCCTATAATAATTGAGAATAACATTGGTTCTTCAGTAGCCACTTGCTTTCTTTCATCTCTTTCCTTCTTTTCCTTTCCTCTTGCTCTGTCTGTTTCTCTAGGCCACCTGAAAACTATACACCGAGCCCAGGCAGAAGCACCTGGATTTCCACTGAGGTCTCCAAGATGGTCAATGGCGAACATTTTCTACACTTTAA |
| TCONS_00414973 | XLOC_069808 | 8:110234687-110238797 | 3777 | CTTAAAGTTATTTCCAATCTAGAAATTTCTGTCCAACAAATTATTAATTTAATGTAAGGGCAGAATAAATAAATTTTCCTACATGTAAATTTTCAGAAAGTTGAATATCTTCATTATAAGCATATAGTCCAACAAAATGAGAAAATGAACCAAGAGAGGGACACGCGTGAAATACTGAAAACAGTAAGCCCAAATAAAAAGTAAAAAGGGTCTCATGTGGATTGTGGTGTAGTGGATTAAAGAGCAACCAGTCCAATTAGGAACAGAAGTACAGAGGGCTCTAAGAGGGAGAGCTTTAGGATAGAGGAAGACTTTATAGAATAAAATAAATGTTTGAGCTTAGAAAAAACTCAAGAGTATGCTAAATAAAATTAATGCAAAAGAACAAATTTCAGAATTCCTGAGAAAAATAAATTTTTTCAGAAGAAAGGCATGGTTCAGTACTACACTAGTGGCACCTAGCATGAAGTTGAGCATGTTAACCTTAATTTTCCCTTTGAGTGGCATTAGGGCAAGCTATTGTACTCACAGAGGAAGAAATGCAATCCCAACAAACTACTTGGGTTTTTAATGAAAAAAATACTGCTGTAAATATGAGAGAGAAAAAGGTATGGGGGAATGGGAGAAAATGAAAAGGCAATGTGGTATGTGGCATGGCTGTATTGTAGGACTCCATCAAATCTTCAGTGTGGGGCCTGCTAAACCCTGTGTGCTTGGATGAGTGAATTTTATGGAGGCTGTCCACAGACAAGGTTGTCCAGTTGTGTGGTCTGTTCATCGTGTAATACAGGTAATATGTAAAGAGGCTGGGTCCCAGTCACTAGAGTGGCAAAGATAACACAAACTTCCCAAGAGTTAGCTAATGTCTTTGGTGGAAGAGGTGGAAAGTGAGGAGAAGGAGTGCAGCTTTGATTTCTACAGGCAATGGATTTGGAAAAGGAGAGTTTAAAGACGTTTCCCCTATGTTTGAATCACCAGCATTACACCTGCATGACAAACTAAGGACTTGGGTTATAAGTGACAGAAGCACTTGTTAAAAGGATCAAAGCTGCATGAACTGTGGACCATCTGGGACCTCGACGTTTCAGCCACAACTTAAACACCATTGTCATTCAGTCCTGTCTCCCTTATATCACCTTTATTCTCTCCTGCTGCTCACTGGATGTCTCCATCTGCTGGTAATGTGACTAGCAACAGTTTACAGTGCTACATTGTAACAGTTTCATAATCTGCTTAAATCTGAAAAATCCCAGTGACAGCCCTCAGATGGATTTGCTTTGTTTTGTGTGCCCATCTCTGCAGTCATTGTGCCTAAGGAGCAAGGCTCTCCAATGTCTCAGCTGTGGAGTGGGGGTTAGGCCTGTTACCAGATTACAGGAGACCAAACAAAGCCCATCGGAGAATTCTGAGCCTAGCTTGTCTCTACAACACAAATGAGCAAGCAGTACAAACTCCAAAGCTAACACAAATACAAAAAGTACCAAAAAAATCATAAATCAGAAATTTAAAAAACTCTCACTTGGCTCCAGGGACAATAACCAAAACCATGGACTGAGGTTTTATTAACCTATCAGGCTATGGAGATTAGAATATGTGGATACCTATTCTACAAGCACCAAAGAATAAGAATTTTGTTACTTTACCTTTTAAACCCACACATATTAGTCATAGATTAACAGCTTTCTAACTGCAAATCCAATACACTTCCTTAGTCAATCCAGCATTCTTGGGGCAGACTTTATCTCTTTGCAAGGCAACTCACCTTCCTTCCTTTCCCCTTACCGACCACCTCTTATTATCCTTCATAAAAATCATTTCTCCTGTGCCCTTCTACTTGTCTTCAGGCTCTGCTTTTCATTGGCAGTAGCTTATCACATAAACTCATCTCTGCTAATGTGTTACATCTCCCAGGTAACAGAGCTCATTGTTGACTACCAAGGATAAATCTCCTTTATATCCAAACTCTGTCCCCCTGAGCCCAATTACTTTCCTCTGAAATACCAGTGTATTTTTCATTAAAATGCTTGCAAATCCTTCGGGTTATTAGGTTTATGGCAGCCCCATTAAGCAGAACAATGATGATTTATGTAAGAAGTTAGACCAGAATCTTTGTTTTGTTTAATAAAAAGGTTCACAGCCTGCAGCTAGATGCTGAGCTCTTGCAACCTTGCATGTTTCTGTCACATAGACCGTCTTTCTATTTTGTTTCCCAGAAGAATGCTAGTCCTGCTTGGAGCTGCTTTTCTAAACTTACAAACCAGGAAGCCCAGCTATGATGTTCAAGCTCCTTTTGCTGAGGAAGCAGCACGGGCTTTGGATCAGGATAGACCTTGGTAAAATGTCTACATCTGCCCCTTATGGGCTTTGTAACTTTGCACAAGTCACTTAACCTCCATGAGCTTAAGTTTCCTCAGGTATATAATGGGTGATAAGACTTTACTGAGTGTTGCACAAATTCAATAAGATACTGAGTAAACCACTCTGCTAGGCTATAGTATCTCCAGTCTCAGATCCATGCATTACCTTTCCCTCTTGTCTTTTGTGTGTTGCAAGTAATGAGACCCCTGCAGGCTGCATTTCCCAGGTTTCCAGTCCCACCTGGGTTCAATCAATAAATGATACTGGTGGGGGATTAGGGGTGTAGGGGAAGGATAAGCCAAGGAATCCCCACAATGCCCAGTCTTCTCCAACTTAGGTGGCATATATTGCAGCAGTCTCTCTCCTTTGTGGCCCCAGTTACTGCTGGCCAGGTGTACCATGATGTCAACTTCTGCAGGTAACCCTGGCCTCTTGGTTAGCTAAAGATGGGGTTCTTTGTCCCACAGCCATGAAAATTCAGGCTCACAGACAATTTGAATAGTGAGTAAACAGGGTTTTATTGGGTGAAAAGGAAAAAAAGGGGAAAACAGGGACTCTCACAAGGCCAGAGTCCCAGCTAGAGCACTTCCCGCCAGGCCGTTTTGAATCCCAGATTCCACACAGGAAGAAGAGGGTCCAGGTTCCTCTTTGCTGCGGACTTCCTGAGGCTCTACTCCAGTACACAGGCTGGTCAGAGTTTCTCTGGGGACCCCCTCCCACCTGGCTGTCTCATTCCCCCATCTAAAGAAGAACATCTAACTGCCATTAAAGACGAAGGCCAATCGTAACTGCTTCCTGCCAACAGGGGGCGCTGCTTTGGGGGAAACAGCAGTCAGATCTATCTCCCTCAGAAGCCTATTTAAGTGTTCCCAGCAGAAGGGACCATCGTCCCAGGCTCTGGTTGTATGACTGGAGTTTGATGGCCTGAAGGAAAGAACAGACAAACCAGGTTATTAGAAAACATGTATCAAAATGAAACAAGGGGAAGGGTAAGGACAGCTCAAAAATTCCGAGGCCATTTACCAGTTTGCACAGGGAGAAGGAAGCCAAAAGCCCGAATGGCAATAAAAACCTTACCCTTTTGCTGGCATGTTGGGCTTCTGGGTTCCCTTCCCCTGAGCCCAATCCTAAGCCAACCAGTTTAAGGTTTGGGAAATTAATTATTTCCAGTTTGGAGGATGCATCTGAGGGGAGTGTCCCATAGTATGGAGACACAATTACCTATCAGTGAAGAGAGGATGAGGAGGAGAAAGGAAAAAAAGGCGTTTTTTTGTTTGTTTTTTTGTTTTTTTAAAGGAGTCCAAGGGGTTCAGGATGCTTTTGAAAGGAGTACAGACAGAAGATGAATGGCATCCTATCTAGAAAGAAGGGAGCAGGCATCCCTGTCGCCTGCATTGTGCCTCTTAACCTCTGTTGTCA |
| TCONS_00421329 | XLOC_071332 | 9:91314324-91320180 | 1115 | GGAATACATAGATGAATGGGTGAGAGGCCTCACCAGTGGCAGCTTCCAGAAGTTTGAGTCTTTCAAGCCCAGGAGCCAGACATATGAATGAGGAAACCTCAAAGGCTTCTTGAAGATGTCTCTCCGTTGCTACCGTCTGACTGTAACCACATGAGAGACCTTGGTGAGAACTGTCCGGCTAAGCTCAGTCAAGCCACAGAATGAGGAGAGCTGTCACCCTTGGGTGACAAGAGGCTCTGCCGCTTGGAAATCTATAAACAGAATGATGGTTCTGCATGGCAGCCATTTAAATAGTTGAACCCAGCAACTGTATCTCCCTTTCCCTCCCTGGAGGCCAACATCTCCGGTTTCTACAAATGTGTCCATGTGGCATGGTGCTCAAGACCTCCTTGTCCCTCTCTGGGTTCCTAGAACTGAACAGGTACTACAAGAGGTGTGAACTTCATCAAGCGCAGAGGGACATTCACCTCTTGTGGCCAGATCAGTGGATTGCAATATGGCGGCCATCAGAATCAGCCCTGGGGGCCAACCTGGGGCTTCTGGGGTAACCGGTCTTGGGAGCAGGCACCTCCCATGATCCCAACGTGCAGCTTTATCAGCCCAGCTCGTGGATGGCTCCTCTGAGTTTACTGTTGATGAAATCGCCCTGGCCAGTACTTGAAGTGTAAGCTGCAGTTGTTGTGTCTTTATTTTGTAATTTTGCAATTGATTGATTGGACTATAGGAGGTTTTTTTGGGGTGTCTTCTCAGAACAACTGTCCCTCCTCACTGCCTGATATGGTAGTGGATTTGACCACGCTGGGGGCCCATGGGTGAGCTGGTCAGAGGCCCAAGATGCATGTGGCAGTGCTGAGAAGGACAAGTGAAGTCACTCCAACCCCTTCTCTTAGGATTTGTAACAGGGTGTCTGGTGGTGGGTCTTGGAGCTGGGAGTTCACATAGATGCTGGTAGCCATTTGAGGCCTTGTGCAAAATGGATAAACAGAAAAATCCACAGGGTTGGCCATTTTAGTGGTCAGTATGGTGGCAAAAGTAATATGCATGTGTAATATTGTGTGACATAATGAAAAATCATTGTTTCAAATGTATTCGCTGACATTTGTCATTAATAGCTG |
| TCONS_00422748 | XLOC_071650 | 9:116379483-116390403 | 989 | TCCTTACGTGGTAAGCATATGTACATTGCAGGCCTGCTGCTTCCTGGACCAACTCTTCCATGGCCCTGGGTGTCACCCAGTGTTTCTGGAGCCTCTGAGTGGTGCCCGCTGCCTGGCAGCAGCCCCTGGAGGTGGTCACGGTGTCTACAATTCCATCACCAGATCTTCCATTTCCAGGAGTAACCCTGGGCAGGTGTATACCATGTGTCTTGTTTACAGTGGGGATTAATAGTTCAAGGAGCCCAAGGAGGGAAGGACCGGATGTACTCTGCAATCCCAGAAAACTCAATGGGCTGAGGCAGGAGGACCTACTGGCCATTGAAGACTGTCCACTCCTGGTCCAGATTCCAAGTGACCAGGCAGAAAGAGCATGGACTTTGGAGTTTGATTGCCTGGCTTTAAATCCCCCTGCTCCACTCGCTACTGTGGTGTGGACTCAAACTTGAGGTACAGTCATCCTATGAAGGATCAGAGCTGGAAAGTGGGGGCCTGGCTCAGGGAGCAGCAGAACCAGAGCAGAAGCTGAGCTGGAGATGCCCTGATGGGGCCGAGGTGGAGGCTCAGGCCTGGGATGGGCAGTTGGACCAGCAGGTCCAAAACAGCAGAAGCCAAGGCAGGCAGCGGTCTTGGAGATGCCCTCTGACCTGCCGTGGACTGGAGCCTCTAAGATGCTTCCTCCTGAGGCTGGAGCTGATGACTGGCATCCTTGGGATGTAACCTGCGTGCAGCCGGCAGGTGAGGACGTCATGCAGGGCAGGAGCTCAGGCCCCCCAGAGGGGGTCACACCTGGCCGGGCCACTGCCCTGTGAACATCCTTTCAAGGGACCCTTTCTCTTGCTTGTTTGTGGCCCCGCTAGACTGTAAGCTCTTGAGGACAGAGCCATTGGGAATGAATGACAAGGTGAGTCTGGGGGCCCAGGACCCCAGACAGTAGCTGTCCTTACTGAGAGAAGGGTTAGGGCTCCCGGAGGCATGGAGAAGGATGAAGG |
| TCONS_00426215 | XLOC_072222 | 9:12685438-12822130 | 2131 | TATTAATCCAACTATATCAATCACTTTAAATGTGAATAGTCTAAATACATCAATTAAAAGACAAAGACTGTCAAAGTGGATAAACAAACAAGACCCAATTATAACTTGTCTACTAGAAACCCACCTTAAATATAAAGTTACAGATTAATTTCACTATGCAGGTGAAGGAAAATGAGACTCAGAGGACTAAGGCATCATATTCTTGCAGATTTTAAGTGGCAGAGCCAGAATCAGACTGAAGTTTAGTTAACTACATAGTCTCTAGTCTCTCCTTCAAACTGTGTTGCCTGGAAAGGGTCTTTATATTTCATGCTGTGAGAAACAGATAATCTCTTCCAAAGTTTACTCGTAATACATCAGATTACCCTGGCCAATTCTCTTTTTCAGTCTCATTTTATTTATTTAGTTAGTTAGTTAGTCAGTTAGTTAGTTTTTGAGATGGAGTCTCGCTCTGTCGCCCAGGCTGGAGTGCAGTGGCGCGATGGTTTAGACTCATTTTTAAAAGACTTTAGTTGTTCAGAAGAGTAGAGTGATATAGTTGAATAGTGGCAAAAGAACTAACTGAGGGGCAAAAAGAGGCTATTAACAGTTATTGAGAGACTGTATGTACATGACATTCTCCTAGACCCTGGTAGAGCATAGCGACAACACTGTCACCTCAAATGAAGAACATTACAATCTAGAAATGGAAATCTCAACACCTTATTTTTTTTCTAGGCCTACTAGAAAAAATAAAAAAGTAAATTAGTATAATCCACTTTTACCAAAAATTTTCAAAATTTTCAAAATTCCTTGAGAATATTTATAGACTTCTAAAAGTAAAACATAAAATTGTTTTAGACAATTATCCAACATTTGAAAATAAAGCAAAGTTTGAATGTCTCTTCCATGATAAAATGGAGCATAGCCCAAGAAGCCATCAAAGCATTATTTAATTATCTATGTGGTTATAGTTTTGTGTGACCTACTGTTTACTACTGAATTGACCCAGCATTATGAAGCTGTAAATTGACTGGTAGATTTGTGTCTTGAAGAAATGCAAATTGCTTCTACCCAGAAAAGAAAAAAAAAAAGATAATCTCAAAGGTTATAGTTTTATTTTCCTACTGGATGTTTGATAATTTAATATGTATACTAGAAAACGAATTCATATGATTTTCCTGAGAAAATATACAACCTATACAACCTACACAGCCTACTCATCTAGTTCTCTTGAACCAGCTGTACCATCTTGCTGGTTCTCTCATTAAATAAGCTAAATCAATCTTTGACAAATGTTCCCTCTATATTTGTGTAAGAGTCATGTTTTCAACTTTTTAAAAAAATTATATTTTGACAGATTTGAAGGTTGCCCTAAAGGTGCATAGTGTGTTCACCTGCTAGAGCTAGTTAAGCAGAGTTGCCCAAGAAACTCCTGGGGTGAATCACAAACAGCAATAGAATTTTCCCTTTCGGACTGTCAGATTTGTCTTCTGATTCTGTTTTTCTTTTCTTTTCTTTTTTTCTGGTTTGTTTCATTGTCGCTCCTGATCTTGGCCAGGAAGTTCCACATTTGTTTAACTTATTGTCTAGGATTATGTCCATTTTCACAACTGCTACTGGATCACAAGGTTGGGCTTAATTATGTAATCAAGAGAACCCTCATGTATAAAACAGGTGTATAAAACAGCCGATTCCAGAGACTAGTAGGTACTGAATAACTAGGTGAGTAGAGGTCACATAATCTATAAAATGTTCCCCCTTTGGAATGACAATAATTAGCAATCTGGTTTTATGACAAGATCACTTGGTAACCTATATTAGGATGATGAGAATATATTCTTTGTTGAGTGGTAGAAGACAGAGAATATGGTTAGTTGTTCCATATTTTTTGTGTGTCTATTTGTCTGCTTAAATCCATAAAGAAAACATTCATTTTTCACTGAAAAGGAGAATAACCATTGAGACTGTGTGTCTTTTGCTTGAGGTTGTGGAACTGAATTTCAAGTCCTGTAGGTGGTTGTGTATTTAACTGAGAAAAAAACCTTTCACCACTATTTACCATATTTAGTATTCATATATGCATATAACTATTTATCATAATAAGAATATGAAGTCTTTTCTTCTAGGATATACCAATAAATTAAATTAC |
