# Supplementary material for: Genome-Wide Identification of Long Noncoding RNAs in Human Intervertebral Disc Degeneration by RNA Sequencing
Source: Hindawi journal article supplement (doi:10.1155/2016/3684875), 2016-01-01
Supplement: f6 [file 3684875.f6.docx]

| **Test_ID** | **Gene ID** | **Gene symbol** | **Locus** | **Database Source** | **FPKM Control** | **FPKM IDD** | **p-value** |
| --- | --- | --- | --- | --- | --- | --- | --- |
| ENST00000367772 | ENSG00000000457 | SCYL3 | 1:169631244-169863408 | Protein_coding_from_Ensembl | 2.54889 | 0.858368 | 5.00E-05 |
| ENST00000374003 | ENSG00000000938 | FGR | 1:27938574-27961788 | Protein_coding_from_Ensembl | 0.785904 | 2.57861 | 0.0006 |
| ENST00000374811 | ENSG00000001497 | LAS1L | X:64708614-64754655 | Protein_coding_from_Ensembl | 0.924888 | 2.02641 | 0.0038 |
| ENST00000412043 | ENSG00000001631 | KRIT1 | 7:91828282-91875480 | Protein_coding_from_Ensembl | 0.128817 | 1.13133 | 0.00485 |
| ENST00000440209 | ENSG00000001631 | KRIT1 | 7:91828282-91875480 | Protein_coding_from_Ensembl | 4.21302 | 1.37088 | 0.0387 |
| ENST00000437877 | ENSG00000002822 | MAD1L1 | 7:1855428-2272878 | Protein_coding_from_Ensembl | 2.16974 | 0.516937 | 0.04315 |
| ENST00000435347 | ENSG00000002834 | LASP1 | 17:37026111-37078023 | Protein_coding_from_Ensembl | 0.968209 | 3.39055 | 5.00E-05 |
| ENST00000265577 | ENSG00000003147 | ICA1 | 7:8152813-8394033 | Protein_coding_from_Ensembl | 0.517209 | 2.10719 | 0.0003 |
| ENST00000443227 | ENSG00000003402 | CFLAR | 2:201980826-202043285 | Protein_coding_from_Ensembl | 0.680571 | 1.56393 | 0.0462 |
| ENST00000417905 | ENSG00000003756 | RBM5 | 3:49977439-50226508 | Protein_coding_from_Ensembl | 13.3984 | 6.45726 | 0.0447 |
| ENST00000421682 | ENSG00000004534 | RBM6 | 3:49977439-50226508 | Protein_coding_from_Ensembl | 4.26047 | 1.30542 | 0.04085 |
| ENST00000381771 | ENSG00000004660 | CAMKK1 | 17:3617921-4269923 | Protein_coding_from_Ensembl | 1.41161 | 0.54483 | 0.0067 |
| ENST00000317751 | ENSG00000004766 | CCDC132 | 7:92861652-92988338 | Protein_coding_from_Ensembl | 0.35542 | 1.29088 | 0.0158 |
| ENST00000599848 | ENSG00000005007 | UPF1 | 19:18942746-18979045 | Protein_coding_from_Ensembl | 3.4348 | 1.09581 | 5.00E-05 |
| ENST00000585941 | ENSG00000005156 | LIG3 | 17:33254877-33332083 | Protein_coding_from_Ensembl | 1.19111 | 0.323097 | 0.02445 |
| ENST00000262327 | ENSG00000005156 | LIG3 | 17:33254877-33332083 | Protein_coding_from_Ensembl | 0.633614 | 1.51409 | 0.0035 |
| ENST00000394391 | ENSG00000005194 | CIAPIN1 | 16:57462080-57521239 | Protein_coding_from_Ensembl | 1.15715 | 4.12761 | 5.00E-05 |
| ENST00000409791 | ENSG00000005448 | WDR54 | 2:74641303-74652882 | Protein_coding_from_Ensembl | 1.67463 | 0.358703 | 0.0412 |
| ENST00000257745 | ENSG00000005483 | KMT2E | 7:104581509-105039755 | Protein_coding_from_Ensembl | 3.82733 | 0.0740134 | 0.00635 |
| ENST00000476671 | ENSG00000005483 | KMT2E | 7:104581509-105039755 | Protein_coding_from_Ensembl | 1.21072 | 2.50479 | 0.0079 |
| ENST00000510291 | ENSG00000005700 | IBTK | 6:82879699-82957471 | Protein_coding_from_Ensembl | 3.69243 | 1.37796 | 5.00E-05 |
| ENST00000503631 | ENSG00000005700 | IBTK | 6:82879699-82957471 | Protein_coding_from_Ensembl | 0.360694 | 1.39482 | 0.0008 |
| ENST00000544440 | ENSG00000005810 | MYCBP2 | 13:77618791-77901720 | Protein_coding_from_Ensembl | 0.115149 | 4.7055 | 5.00E-05 |
| ENST00000358164 | ENSG00000005844 | ITGAL | 16:30483978-30534506 | Protein_coding_from_Ensembl | 0.153495 | 1.20839 | 0.0021 |
| ENST00000540603 | ENSG00000005893 | LAMP2 | X:119561681-119603220 | Protein_coding_from_Ensembl | 3.97999 | 1.42865 | 0.0007 |
| ENST00000345615 | ENSG00000006114 | SYNRG | 17:35441922-36244363 | Protein_coding_from_Ensembl | 1.07496 | 0.440277 | 0.0026 |
| ENST00000572748 | ENSG00000006194 | ZNF263 | 16:3313742-3368852 | Protein_coding_from_Ensembl | 3.8187 | 1.06885 | 0.01635 |
| ENST00000574253 | ENSG00000006194 | ZNF263 | 16:3313742-3368852 | Protein_coding_from_Ensembl | 0.33425 | 1.58281 | 0.0296 |
| ENST00000356488 | ENSG00000006282 | SPATA20 | 17:48609903-48633213 | Protein_coding_from_Ensembl | 1.40295 | 0.448757 | 0.0038 |
| ENST00000397560 | ENSG00000006459 | JHDM1D | 7:139784545-139879679 | Protein_coding_from_Ensembl | 4.56598 | 2.27537 | 5.00E-05 |
| ENST00000405192 | ENSG00000006468 | ETV1 | 7:13930852-14031050 | Protein_coding_from_Ensembl | 1.83972 | 0.549929 | 5.00E-05 |
| ENST00000416283 | ENSG00000006576 | PHTF2 | 7:77428121-77586818 | Protein_coding_from_Ensembl | 1.04071 | 0.12792 | 0.0034 |
| ENST00000590909 | ENSG00000007047 | MARK4 | 19:45574757-45808541 | Protein_coding_from_Ensembl | 5.43268 | 2.66662 | 0.04225 |
| ENST00000597436 | ENSG00000007080 | CCDC124 | 19:18043824-18054800 | Protein_coding_from_Ensembl | 0.663659 | 2.08709 | 0.0288 |
| ENST00000585266 | ENSG00000007237 | GAS7 | 17:9813925-10101868 | Protein_coding_from_Ensembl | 0.475916 | 1.31102 | 0.00295 |
| ENST00000579158 | ENSG00000007237 | GAS7 | 17:9813925-10101868 | Protein_coding_from_Ensembl | 9.21363 | 1.62852 | 5.00E-05 |
| ENST00000585934 | ENSG00000007255 | TRAPPC6A | 19:45574757-45808541 | Protein_coding_from_Ensembl | 3.72616 | 1.60845 | 0.0344 |
| ENST00000310132 | ENSG00000007264 | MATK | 19:3777970-3802127 | Protein_coding_from_Ensembl | 1.57021 | 3.64364 | 0.00025 |
| ENST00000392795 | ENSG00000007312 | CD79B | 17:62006099-62009714 | Protein_coding_from_Ensembl | 1.76714 | 0.393946 | 0.02395 |
| ENST00000561734 | ENSG00000007376 | RPUSD1 | 16:834973-850737 | Protein_coding_from_Ensembl | 0.412438 | 2.45907 | 0.00175 |
| ENST00000448893 | ENSG00000007384 | RHBDF1 | 16:108057-126354 | Protein_coding_from_Ensembl | 0.446981 | 1.66486 | 0.0452 |
| ENST00000397412 | ENSG00000007545 | CRAMP1L | 16:1662325-1752281 | Protein_coding_from_Ensembl | 1.76694 | 0.872473 | 5.00E-05 |
| ENST00000367774 | ENSG00000007908 | SELE | 1:169631244-169863408 | Protein_coding_from_Ensembl | 0.202083 | 1.6985 | 0.0276 |
| ENST00000542246 | ENSG00000007923 | DNAJC11 | 1:6684925-6761984 | Protein_coding_from_Ensembl | 0.3572 | 1.31926 | 0.0128 |
| ENST00000392085 | ENSG00000007933 | FMO3 | 1:171060017-171086959 | Protein_coding_from_Ensembl | 1.43989 | 0.561122 | 0.01545 |
| ENST00000378638 | ENSG00000008128 | CDK11A | 1:1634168-1677431 | Protein_coding_from_Ensembl | 0.338305 | 0.816539 | 0.0416 |
| ENST00000378633 | ENSG00000008128 | CDK11A | 1:1634168-1677431 | Protein_coding_from_Ensembl | 0.271698 | 1.29431 | 0.01105 |
| ENST00000513906 | ENSG00000008294 | SPAG9 | 17:49039534-49198226 | Protein_coding_from_Ensembl | 1.45524 | 3.72691 | 0.0495 |
| ENST00000393376 | ENSG00000008311 | AASS | 7:121715700-121784334 | Protein_coding_from_Ensembl | 0.768118 | 2.47909 | 5.00E-05 |
| ENST00000599840 | ENSG00000008382 | MPND | 19:4343523-4360083 | Protein_coding_from_Ensembl | 2.6408 | 0.942499 | 0.0023 |
| ENST00000394127 | ENSG00000008838 | MED24 | 17:38175349-38256978 | Protein_coding_from_Ensembl | 0.791982 | 2.8078 | 5.00E-05 |
| ENST00000523936 | ENSG00000008988 | RPS20 | 8:56979853-56987069 | Protein_coding_from_Ensembl | 1.88927 | 3.97822 | 0.0389 |
| ENST00000529046 | ENSG00000009307 | CSDE1 | 1:115259533-115301297 | Protein_coding_from_Ensembl | 1.26165 | 7.98274 | 0.02035 |
| ENST00000345716 | ENSG00000010322 | NISCH | 3:52489133-52527087 | Protein_coding_from_Ensembl | 2.5018 | 6.22552 | 5.00E-05 |
| ENST00000533418 | ENSG00000010361 | FUZ | 19:50270224-50320813 | Protein_coding_from_Ensembl | 2.07087 | 0.65753 | 0.01035 |
| ENST00000370441 | ENSG00000010404 | IDS | X:148558520-148632055 | Protein_coding_from_Ensembl | 3.08731 | 1.18198 | 0.00725 |
| ENST00000007969 | ENSG00000010626 | LRRC23 | 12:6976282-7032861 | Protein_coding_from_Ensembl | 2.27477 | 1.03485 | 0.01845 |
| ENST00000517419 | ENSG00000010810 | FYN | 6:111981534-112194655 | Protein_coding_from_Ensembl | 4.5683 | 2.0986 | 0.0487 |
| ENST00000012134 | ENSG00000010818 | HIVEP2 | 6:143069579-143266338 | Protein_coding_from_Ensembl | 0.0567404 | 0.906001 | 0.0012 |
| ENST00000393193 | ENSG00000011052 | NME2 | 17:49230896-49249108 | Protein_coding_from_Ensembl | 3.08361 | 1.17049 | 0.0159 |
| ENST00000415868 | ENSG00000011258 | MBTD1 | 17:49254785-49375297 | Protein_coding_from_Ensembl | 0.109798 | 0.957152 | 0.005 |
| ENST00000339082 | ENSG00000011422 | PLAUR | 19:44150246-44174699 | Protein_coding_from_Ensembl | 2.38241 | 1.14618 | 0.0365 |
| ENST00000357654 | ENSG00000012048 | BRCA1 | 17:41196311-41277500 | Protein_coding_from_Ensembl | 0.825018 | 0.243099 | 0.0003 |
| ENST00000592083 | ENSG00000012061 | ERCC1 | 19:45882891-45982086 | Protein_coding_from_Ensembl | 4.02285 | 1.42577 | 0.01605 |
| ENST00000423698 | ENSG00000012061 | ERCC1 | 19:45882891-45982086 | Protein_coding_from_Ensembl | 5.80461 | 2.90227 | 5.00E-05 |
| ENST00000013807 | ENSG00000012061 | ERCC1 | 19:45882891-45982086 | Protein_coding_from_Ensembl | 1.84422 | 3.74171 | 0.01815 |
| ENST00000440077 | ENSG00000012817 | KDM5D | Y:21865750-21906825 | Protein_coding_from_Ensembl | 1.30702 | 3.32802 | 5.00E-05 |
| ENST00000355851 | ENSG00000013374 | NUB1 | 7:151038784-151112174 | Protein_coding_from_Ensembl | 1.20249 | 4.22787 | 5.00E-05 |
| ENST00000394519 | ENSG00000013561 | RNF14 | 5:141323143-141369856 | Protein_coding_from_Ensembl | 1.06076 | 0.153582 | 0.0115 |
| ENST00000415475 | ENSG00000013573 | DDX11 | 12:31173696-31257725 | Protein_coding_from_Ensembl | 1.80431 | 5.63333 | 0.0013 |
| ENST00000533820 | ENSG00000014216 | CAPN1 | 11:64945076-64979477 | Protein_coding_from_Ensembl | 0.991426 | 2.78525 | 0.0002 |
| ENST00000381604 | ENSG00000015171 | ZMYND11 | 10:180404-300577 | Protein_coding_from_Ensembl | 0.437716 | 1.02761 | 0.0216 |
| ENST00000503811 | ENSG00000015479 | MATR3 | 5:138282408-138667360 | Protein_coding_from_Ensembl | 1.14815 | 0.333391 | 0.02295 |
| ENST00000478968 | ENSG00000016864 | GLT8D1 | 3:52529353-52742182 | Protein_coding_from_Ensembl | 3.88242 | 9.24584 | 5.00E-05 |
| ENST00000504612 | ENSG00000017260 | ATP2C1 | 3:130569438-131100319 | Protein_coding_from_Ensembl | 6.44704 | 2.04396 | 5.00E-05 |
| ENST00000393221 | ENSG00000017260 | ATP2C1 | 3:130569438-131100319 | Protein_coding_from_Ensembl | 1.12781 | 4.57134 | 5.00E-05 |
| ENST00000347616 | ENSG00000018236 | CNTN1 | 12:41086243-41466220 | Protein_coding_from_Ensembl | 0.267957 | 0.805805 | 0.00985 |
| ENST00000346617 | ENSG00000020256 | ZFP64 | 20:50668201-50820847 | Protein_coding_from_Ensembl | 0.663116 | 1.92364 | 0.0003 |
| ENST00000357634 | ENSG00000020577 | SAMD4A | 14:55033814-55260033 | Protein_coding_from_Ensembl | 0.156394 | 1.52704 | 5.00E-05 |
| ENST00000323977 | ENSG00000020922 | MRE11A | 11:94152894-94232749 | Protein_coding_from_Ensembl | 0.719373 | 2.9019 | 5.00E-05 |
| ENST00000227214 | ENSG00000021300 | PLEKHB1 | 11:73357222-73373864 | Protein_coding_from_Ensembl | 0.193398 | 1.1351 | 0.0311 |
| ENST00000428277 | ENSG00000021645 | NRXN3 | 14:78636715-80334633 | Protein_coding_from_Ensembl | 0.351587 | 0.86086 | 0.0052 |
| ENST00000543669 | ENSG00000022267 | FHL1 | X:135228860-135293518 | Protein_coding_from_Ensembl | 0.30249 | 0.916488 | 0.0158 |
| ENST00000559185 | ENSG00000022976 | ZNF839 | 14:102783713-102829253 | Protein_coding_from_Ensembl | 2.52461 | 0.638712 | 5.00E-05 |
| ENST00000262236 | ENSG00000022976 | ZNF839 | 14:102783713-102829253 | Protein_coding_from_Ensembl | 0.497433 | 1.21362 | 0.00855 |
| ENST00000438658 | ENSG00000023191 | RNH1 | 11:494511-515605 | Protein_coding_from_Ensembl | 3.53287 | 0.792785 | 0.0002 |
| ENST00000025008 | ENSG00000023287 | RB1CC1 | 8:53535015-53658403 | Protein_coding_from_Ensembl | 4.5432 | 1.86012 | 5.00E-05 |
| ENST00000428559 | ENSG00000023697 | DERA | 12:16064105-16190220 | Protein_coding_from_Ensembl | 4.83467 | 2.26944 | 0.00035 |
| ENST00000542066 | ENSG00000023892 | DEF6 | 6:35265594-35289548 | Protein_coding_from_Ensembl | 0.538987 | 2.34789 | 0.00135 |
| ENST00000368455 | ENSG00000025156 | HSF2 | 6:122720690-122754264 | Protein_coding_from_Ensembl | 2.91104 | 0.297803 | 0.0014 |
| ENST00000452194 | ENSG00000025156 | HSF2 | 6:122720690-122754264 | Protein_coding_from_Ensembl | 1.12131 | 4.36549 | 5.00E-05 |
| ENST00000395397 | ENSG00000025434 | NR1H3 | 11:47260852-47290396 | Protein_coding_from_Ensembl | 2.5646 | 1.15149 | 0.0097 |
| ENST00000441012 | ENSG00000025434 | NR1H3 | 11:47260852-47290396 | Protein_coding_from_Ensembl | 1.09419 | 3.26515 | 0.00075 |
| ENST00000395701 | ENSG00000025770 | NCAPH2 | 22:50946644-50961901 | Protein_coding_from_Ensembl | 0.270767 | 0.817983 | 0.04145 |
| ENST00000299821 | ENSG00000025770 | NCAPH2 | 22:50946644-50961901 | Protein_coding_from_Ensembl | 0.776591 | 1.8448 | 0.01055 |
| ENST00000545542 | ENSG00000025800 | KPNA6 | 1:32573638-32642169 | Protein_coding_from_Ensembl | 3.25197 | 0.200786 | 0.01165 |
| ENST00000279452 | ENSG00000026508 | CD44 | 11:35160416-35253949 | Protein_coding_from_Ensembl | 6.56593 | 0.912834 | 0.00505 |
| ENST00000476549 | ENSG00000026950 | BTN3A1 | 6:26402464-26415444 | Protein_coding_from_Ensembl | 1.22104 | 0.525932 | 0.0376 |
| ENST00000557585 | ENSG00000027075 | PRKCH | 14:61654276-62125414 | Protein_coding_from_Ensembl | 1.28731 | 3.93681 | 0.01 |
| ENST00000467963 | ENSG00000028310 | BRD9 | 5:693674-919472 | Protein_coding_from_Ensembl | 4.57964 | 2.28729 | 0.00015 |
| ENST00000483173 | ENSG00000028310 | BRD9 | 5:693674-919472 | Protein_coding_from_Ensembl | 1.31387 | 3.58653 | 0.0002 |
| ENST00000560829 | ENSG00000028528 | SNX1 | 15:64386321-64438289 | Protein_coding_from_Ensembl | 1.04318 | 0.312382 | 0.0335 |
| ENST00000261178 | ENSG00000029153 | ARNTL2 | 12:27485786-27610684 | Protein_coding_from_Ensembl | 0.937859 | 2.41829 | 0.0028 |
| ENST00000527536 | ENSG00000029363 | BCLAF1 | 6:136578000-136610989 | Protein_coding_from_Ensembl | 6.90541 | 2.80271 | 5.00E-05 |
| ENST00000420827 | ENSG00000033178 | UBA6 | 4:68478369-68566897 | Protein_coding_from_Ensembl | 1.60627 | 0.547574 | 0.0159 |
| ENST00000428386 | ENSG00000033867 | SLC4A7 | 3:27414213-27525911 | Protein_coding_from_Ensembl | 0.35188 | 2.24124 | 5.00E-05 |
| ENST00000445684 | ENSG00000033867 | SLC4A7 | 3:27414213-27525911 | Protein_coding_from_Ensembl | 0.774184 | 2.25052 | 5.00E-05 |
| ENST00000361818 | ENSG00000034152 | MAP2K3 | 17:21187983-21218552 | Protein_coding_from_Ensembl | 2.76021 | 5.62845 | 5.00E-05 |
| ENST00000211998 | ENSG00000035403 | VCL | 10:75757871-75879918 | Protein_coding_from_Ensembl | 2.50256 | 0.885762 | 5.00E-05 |
| ENST00000417648 | ENSG00000035403 | VCL | 10:75757871-75879918 | Protein_coding_from_Ensembl | 1.51989 | 3.17889 | 0.0181 |
| ENST00000457488 | ENSG00000035664 | DAPK2 | 15:64199234-64364232 | Protein_coding_from_Ensembl | 2.37407 | 1.06885 | 0.0067 |
| ENST00000265100 | ENSG00000037241 | RPL26L1 | 5:172381785-172396774 | Protein_coding_from_Ensembl | 7.55352 | 1.83018 | 0.00275 |
| ENST00000519239 | ENSG00000037241 | RPL26L1 | 5:172381785-172396774 | Protein_coding_from_Ensembl | 2.6604 | 8.23665 | 0.0023 |
| ENST00000444116 | ENSG00000037637 | FBXO42 | 1:16573333-16678949 | Protein_coding_from_Ensembl | 2.27378 | 0.497746 | 0.0484 |
| ENST00000257848 | ENSG00000037897 | METTL1 | 12:58156116-58212487 | Protein_coding_from_Ensembl | 0.993778 | 2.50031 | 0.02135 |
| ENST00000512921 | ENSG00000038210 | PI4K2B | 4:25162262-25280714 | Protein_coding_from_Ensembl | 0.57915 | 1.50943 | 0.04535 |
| ENST00000322344 | ENSG00000039650 | PNKP | 19:50364460-50371166 | Protein_coding_from_Ensembl | 3.72467 | 1.84133 | 0.00225 |
| ENST00000596014 | ENSG00000039650 | PNKP | 19:50364460-50371166 | Protein_coding_from_Ensembl | 2.97653 | 5.97132 | 0.00025 |
| ENST00000524300 | ENSG00000040341 | STAU2 | 8:74332238-74791145 | Protein_coding_from_Ensembl | 0.956657 | 0.435192 | 0.02175 |
| ENST00000519961 | ENSG00000040341 | STAU2 | 8:74332238-74791145 | Protein_coding_from_Ensembl | 0.448776 | 1.14649 | 0.0032 |
| ENST00000375155 | ENSG00000040487 | PQLC2 | 1:19638739-19660931 | Protein_coding_from_Ensembl | 2.00251 | 0.4628 | 0.00535 |
| ENST00000454255 | ENSG00000040633 | PHF23 | 17:7138346-7143041 | Protein_coding_from_Ensembl | 3.78997 | 1.19045 | 0.0002 |
| ENST00000409540 | ENSG00000040933 | INPP4A | 2:99061316-99210853 | Protein_coding_from_Ensembl | 0.640773 | 1.32731 | 0.00885 |
| ENST00000431474 | ENSG00000041880 | PARP3 | 3:51976360-51982883 | Protein_coding_from_Ensembl | 1.45929 | 3.76895 | 5.00E-05 |
| ENST00000556498 | ENSG00000042088 | TDP1 | 14:90421282-90511106 | Protein_coding_from_Ensembl | 0.190407 | 1.0202 | 0.018 |
| ENST00000263867 | ENSG00000042493 | CAPG | 2:85621870-85645555 | Protein_coding_from_Ensembl | 2.14137 | 9.2356 | 5.00E-05 |
| ENST00000597020 | ENSG00000042753 | AP2S1 | 19:47341392-47354249 | Protein_coding_from_Ensembl | 1.11222 | 4.05134 | 0.0213 |
| ENST00000521416 | ENSG00000043462 | LCP2 | 5:169659450-169725231 | Protein_coding_from_Ensembl | 1.85762 | 4.19085 | 0.0012 |
| ENST00000316891 | ENSG00000043514 | TRIT1 | 1:40306722-40349183 | Protein_coding_from_Ensembl | 3.48906 | 1.21849 | 5.00E-05 |
| ENST00000515883 | ENSG00000047188 | YTHDC2 | 5:112849379-112930982 | Protein_coding_from_Ensembl | 0.524316 | 1.13197 | 0.02025 |
| ENST00000380241 | ENSG00000047230 | CTPS2 | X:16606125-16731059 | Protein_coding_from_Ensembl | 1.98689 | 0.652698 | 0.00015 |
| ENST00000380045 | ENSG00000047634 | SCML1 | X:17755587-17773105 | Protein_coding_from_Ensembl | 1.29712 | 0.552714 | 0.0093 |
| ENST00000535237 | ENSG00000047932 | GOPC | 6:117609462-117923691 | Protein_coding_from_Ensembl | 0.360273 | 1.35158 | 0.00025 |
| ENST00000406072 | ENSG00000048052 | HDAC9 | 7:18126571-19157295 | Protein_coding_from_Ensembl | 0.876606 | 3.0834 | 5.00E-05 |
| ENST00000508164 | ENSG00000048140 | TSPAN17 | 5:176074387-176086058 | Protein_coding_from_Ensembl | 1.08976 | 2.78318 | 0.00085 |
| ENST00000512702 | ENSG00000048342 | CC2D2A | 4:15471488-15603180 | Protein_coding_from_Ensembl | 0.981692 | 3.08492 | 5.00E-05 |
| ENST00000522368 | ENSG00000048392 | RRM2B | 8:103216729-103251346 | Protein_coding_from_Ensembl | 2.54012 | 0.832447 | 0.00235 |
| ENST00000409478 | ENSG00000048991 | R3HDM1 | 2:136289024-136482840 | Protein_coding_from_Ensembl | 2.67122 | 1.15989 | 5.00E-05 |
| ENST00000264160 | ENSG00000048991 | R3HDM1 | 2:136289024-136482840 | Protein_coding_from_Ensembl | 0.585277 | 1.30882 | 0.001 |
| ENST00000456040 | ENSG00000048991 | R3HDM1 | 2:136289024-136482840 | Protein_coding_from_Ensembl | 0.560797 | 2.63293 | 0.0401 |
| ENST00000464680 | ENSG00000049192 | ADAMTS6 | 5:64444562-64777747 | Protein_coding_from_Ensembl | 1.96579 | 0.942198 | 0.00485 |
| ENST00000380553 | ENSG00000049540 | ELN | 7:72440164-74366314 | Protein_coding_from_Ensembl | 2.15467 | 1.0243 | 0.0201 |
| ENST00000275248 | ENSG00000049618 | ARID1B | 6:157099062-157531913 | Protein_coding_from_Ensembl | 0.0947132 | 4.05125 | 0.0001 |
| ENST00000320895 | ENSG00000049656 | CLPTM1L | 5:1317858-1345214 | Protein_coding_from_Ensembl | 1.67656 | 5.65352 | 5.00E-05 |
| ENST00000511181 | ENSG00000049860 | HEXB | 5:73923230-74072737 | Protein_coding_from_Ensembl | 0.683707 | 1.40372 | 0.03665 |
| ENST00000261247 | ENSG00000050130 | JKAMP | 14:59886338-60043549 | Protein_coding_from_Ensembl | 2.84164 | 1.23869 | 0.0032 |
| ENST00000262055 | ENSG00000050426 | LETMD1 | 12:51441744-51454207 | Protein_coding_from_Ensembl | 0.992041 | 2.38582 | 0.0023 |
| ENST00000393360 | ENSG00000050748 | MAPK9 | 5:179660142-179719099 | Protein_coding_from_Ensembl | 2.44625 | 0.844148 | 5.00E-05 |
| ENST00000162330 | ENSG00000050820 | BCAR1 | 16:75262927-75301951 | Protein_coding_from_Ensembl | 0.879758 | 0.334757 | 0.0118 |
| ENST00000535626 | ENSG00000050820 | BCAR1 | 16:75262927-75301951 | Protein_coding_from_Ensembl | 0.369446 | 1.02737 | 0.00835 |
| ENST00000449352 | ENSG00000051009 | FAM160A2 | 11:6232564-6255941 | Protein_coding_from_Ensembl | 1.94427 | 0.897725 | 0.0008 |
| ENST00000539827 | ENSG00000051128 | HOMER3 | 19:19010322-19057640 | Protein_coding_from_Ensembl | 1.5713 | 0.390818 | 0.00755 |
| ENST00000567174 | ENSG00000051523 | CYBA | 16:88709690-88717560 | Protein_coding_from_Ensembl | 0.952213 | 2.68287 | 0.01955 |
| ENST00000265097 | ENSG00000051596 | THOC3 | 5:175333941-175461683 | Protein_coding_from_Ensembl | 2.41138 | 0.494158 | 0.0045 |
| ENST00000302349 | ENSG00000051825 | MPHOSPH9 | 12:123636866-123756881 | Protein_coding_from_Ensembl | 2.42882 | 0.424982 | 5.00E-05 |
| ENST00000299275 | ENSG00000052126 | PLEKHA5 | 12:19282647-19873735 | Protein_coding_from_Ensembl | 1.376 | 5.64137 | 5.00E-05 |
| ENST00000369528 | ENSG00000052723 | SIKE1 | 1:115312099-115323308 | Protein_coding_from_Ensembl | 0.845967 | 3.11199 | 5.00E-05 |
| ENST00000261507 | ENSG00000052802 | MSMO1 | 4:166248774-166264312 | Protein_coding_from_Ensembl | 4.09449 | 1.84658 | 0.0001 |
| ENST00000393766 | ENSG00000052802 | MSMO1 | 4:166248774-166264312 | Protein_coding_from_Ensembl | 0.830749 | 3.49897 | 0.00025 |
| ENST00000407381 | ENSG00000054611 | TBC1D22A | 22:47158517-47571342 | Protein_coding_from_Ensembl | 1.55573 | 4.63411 | 5.00E-05 |
| ENST00000356081 | ENSG00000054654 | SYNE2 | 14:64319682-64805317 | Protein_coding_from_Ensembl | 1.96719 | 4.41247 | 0.03105 |
| ENST00000375590 | ENSG00000055070 | SZRD1 | 1:16679039-16763919 | Protein_coding_from_Ensembl | 1.37285 | 0.344311 | 0.02895 |
| ENST00000401088 | ENSG00000055070 | SZRD1 | 1:16679039-16763919 | Protein_coding_from_Ensembl | 1.71251 | 0.737059 | 0.0005 |
| ENST00000522858 | ENSG00000055147 | FAM114A2 | 5:153369687-153825410 | Protein_coding_from_Ensembl | 1.12628 | 0.297124 | 0.00575 |
| ENST00000405334 | ENSG00000055332 | EIF2AK2 | 2:37311593-37384208 | Protein_coding_from_Ensembl | 7.95122 | 3.19019 | 5.00E-05 |
| ENST00000452749 | ENSG00000055609 | KMT2C | 7:151832009-152133090 | Protein_coding_from_Ensembl | 29.3016 | 10.7712 | 0.00055 |
| ENST00000442400 | ENSG00000055917 | PUM2 | 2:20448451-20551995 | Protein_coding_from_Ensembl | 2.73847 | 7.79108 | 0.00065 |
| ENST00000423239 | ENSG00000056586 | RC3H2 | 9:125606834-125667620 | Protein_coding_from_Ensembl | 3.10872 | 1.36702 | 5.00E-05 |
| ENST00000581345 | ENSG00000056661 | PCGF2 | 17:36886487-36906969 | Protein_coding_from_Ensembl | 0.120315 | 1.68924 | 0.0191 |
| ENST00000288167 | ENSG00000056736 | IL17RB | 3:53880606-53899827 | Protein_coding_from_Ensembl | 1.6394 | 0.761022 | 0.01945 |
| ENST00000540564 | ENSG00000057252 | SOAT1 | 1:179262848-179327815 | Protein_coding_from_Ensembl | 3.24906 | 1.57089 | 0.0014 |
| ENST00000449528 | ENSG00000058091 | CDK14 | 7:89964536-90839905 | Protein_coding_from_Ensembl | 0.688655 | 4.09554 | 0.0238 |
| ENST00000553081 | ENSG00000058272 | PPP1R12A | 12:79945573-80334448 | Protein_coding_from_Ensembl | 4.13129 | 1.01575 | 0.0048 |
| ENST00000547330 | ENSG00000058272 | PPP1R12A | 12:79945573-80334448 | Protein_coding_from_Ensembl | 6.57689 | 3.0742 | 5.00E-05 |
| ENST00000450142 | ENSG00000058272 | PPP1R12A | 12:79945573-80334448 | Protein_coding_from_Ensembl | 2.34018 | 7.23254 | 5.00E-05 |
| ENST00000332127 | ENSG00000058673 | ZC3H11A | 1:203764781-203823252 | Protein_coding_from_Ensembl | 0.498679 | 2.88491 | 5.00E-05 |
| ENST00000540001 | ENSG00000058804 | NDC1 | 1:54231132-54304533 | Protein_coding_from_Ensembl | 1.06726 | 0.422478 | 0.0019 |
| ENST00000537333 | ENSG00000058804 | NDC1 | 1:54231132-54304533 | Protein_coding_from_Ensembl | 1.50848 | 0.636868 | 0.0138 |
| ENST00000508903 | ENSG00000059145 | UNKL | 16:1355547-1464752 | Protein_coding_from_Ensembl | 2.09073 | 0.771931 | 0.00015 |
| ENST00000263549 | ENSG00000059378 | PARP12 | 7:139723543-139763521 | Protein_coding_from_Ensembl | 0.912942 | 0.410355 | 0.01215 |
| ENST00000313525 | ENSG00000059769 | DNAJC25 | 9:114393631-114432526 | Protein_coding_from_Ensembl | 0.394 | 1.65523 | 0.00345 |
| ENST00000075430 | ENSG00000060069 | CTDP1 | 18:77439800-77514510 | Protein_coding_from_Ensembl | 0.75553 | 1.76429 | 0.0007 |
| ENST00000353414 | ENSG00000060718 | COL11A1 | 1:103342022-103574052 | Protein_coding_from_Ensembl | 4.22195 | 1.32565 | 5.00E-05 |
| ENST00000524678 | ENSG00000060749 | QSER1 | 11:32914723-33037285 | Protein_coding_from_Ensembl | 1.20218 | 2.84649 | 0.0008 |
| ENST00000342945 | ENSG00000060982 | BCAT1 | 12:24964294-25113092 | Protein_coding_from_Ensembl | 0.884747 | 0.372411 | 0.0104 |
| ENST00000539780 | ENSG00000060982 | BCAT1 | 12:24964294-25113092 | Protein_coding_from_Ensembl | 0.385283 | 4.74541 | 0.00575 |
| ENST00000502959 | ENSG00000061918 | GUCY1B3 | 4:156680143-156728743 | Protein_coding_from_Ensembl | 1.14995 | 0.24916 | 0.0173 |
| ENST00000507146 | ENSG00000061918 | GUCY1B3 | 4:156680143-156728743 | Protein_coding_from_Ensembl | 0.629886 | 2.04984 | 0.00095 |
| ENST00000428187 | ENSG00000061938 | TNK2 | 3:195590234-195638816 | Protein_coding_from_Ensembl | 2.28996 | 1.0039 | 5.00E-05 |
| ENST00000416152 | ENSG00000061938 | TNK2 | 3:195590234-195638816 | Protein_coding_from_Ensembl | 1.22276 | 2.96995 | 0.00015 |
| ENST00000280379 | ENSG00000061987 | MON2 | 12:62860596-62991363 | Protein_coding_from_Ensembl | 1.35445 | 5.54252 | 5.00E-05 |
| ENST00000454432 | ENSG00000062194 | GPBP1 | 5:56469774-56560506 | Protein_coding_from_Ensembl | 1.40043 | 0.504173 | 0.0002 |
| ENST00000264779 | ENSG00000062194 | GPBP1 | 5:56469774-56560506 | Protein_coding_from_Ensembl | 5.84954 | 2.21545 | 5.00E-05 |
| ENST00000355166 | ENSG00000062524 | LTK | 15:41795835-41806085 | Protein_coding_from_Ensembl | 0.81296 | 0.175291 | 0.0113 |
| ENST00000372176 | ENSG00000062598 | ELMO2 | 20:44994687-45088009 | Protein_coding_from_Ensembl | 0.394713 | 1.5162 | 0.00025 |
| ENST00000549920 | ENSG00000063177 | RPL18 | 19:49118583-49140695 | Protein_coding_from_Ensembl | 0.988486 | 3.2495 | 0.0176 |
| ENST00000411543 | ENSG00000063245 | EPN1 | 19:56186591-56249768 | Protein_coding_from_Ensembl | 0.881839 | 0.279371 | 0.02355 |
| ENST00000455446 | ENSG00000063854 | HAGH | 16:1845620-1934295 | Protein_coding_from_Ensembl | 1.90284 | 0.77354 | 0.03325 |
| ENST00000506706 | ENSG00000063978 | RNF4 | 4:2420700-2734292 | Protein_coding_from_Ensembl | 1.65078 | 0.789805 | 0.0183 |
| ENST00000511600 | ENSG00000063978 | RNF4 | 4:2420700-2734292 | Protein_coding_from_Ensembl | 0.521035 | 1.41442 | 0.0003 |
| ENST00000512946 | ENSG00000064042 | LIMCH1 | 4:41361623-41702061 | Protein_coding_from_Ensembl | 0.755995 | 1.57522 | 0.0005 |
| ENST00000394162 | ENSG00000064225 | ST3GAL6 | 3:98432740-98620533 | Protein_coding_from_Ensembl | 0.284461 | 1.58613 | 0.0066 |
| ENST00000372484 | ENSG00000064601 | CTSA | 20:44517263-44540794 | Protein_coding_from_Ensembl | 1.55072 | 0.408955 | 0.00845 |
| ENST00000435683 | ENSG00000064687 | ABCA7 | 19:1040101-1065571 | Protein_coding_from_Ensembl | 2.13888 | 0.681851 | 5.00E-05 |
| ENST00000433129 | ENSG00000064687 | ABCA7 | 19:1040101-1065571 | Protein_coding_from_Ensembl | 0.623514 | 1.52244 | 5.00E-05 |
| ENST00000504884 | ENSG00000064692 | SNCAIP | 5:121646991-121814782 | Protein_coding_from_Ensembl | 0.316841 | 1.12421 | 0.03175 |
| ENST00000379403 | ENSG00000064726 | BTBD1 | 15:83509837-83772195 | Protein_coding_from_Ensembl | 0.711705 | 1.66474 | 0.0352 |
| ENST00000432365 | ENSG00000065054 | SLC9A3R2 | 16:2075356-2089027 | Protein_coding_from_Ensembl | 11.1469 | 5.56636 | 5.00E-05 |
| ENST00000544045 | ENSG00000065243 | PKN2 | 1:89003195-89301938 | Protein_coding_from_Ensembl | 0.616554 | 1.29554 | 0.0221 |
| ENST00000331886 | ENSG00000065357 | DGKA | 12:56295196-56347884 | Protein_coding_from_Ensembl | 0.350687 | 0.898023 | 0.0154 |
| ENST00000409153 | ENSG00000065413 | ANKRD44 | 2:197831740-198175897 | Protein_coding_from_Ensembl | 1.65951 | 0.726814 | 0.0036 |
| ENST00000263125 | ENSG00000065675 | PRKCQ | 10:6469104-6622263 | Protein_coding_from_Ensembl | 0.238477 | 0.873359 | 0.0087 |
| ENST00000590536 | ENSG00000065717 | TLE2 | 19:2997635-3047633 | Protein_coding_from_Ensembl | 1.14099 | 4.38071 | 5.00E-05 |
| ENST00000378458 | ENSG00000065809 | FAM107B | 10:14560555-14816896 | Protein_coding_from_Ensembl | 1.07996 | 2.23054 | 0.0324 |
| ENST00000436427 | ENSG00000065978 | YBX1 | 1:43148097-43168020 | Protein_coding_from_Ensembl | 3.83754 | 1.43342 | 0.0018 |
| ENST00000394963 | ENSG00000066117 | SMARCD1 | 12:50478754-50494495 | Protein_coding_from_Ensembl | 3.97547 | 1.96807 | 5.00E-05 |
| ENST00000440226 | ENSG00000066136 | NFYC | 1:41153893-41237275 | Protein_coding_from_Ensembl | 0.403404 | 1.6537 | 0.0159 |
| ENST00000393287 | ENSG00000066427 | ATXN3 | 14:92524895-92572965 | Protein_coding_from_Ensembl | 0.618122 | 2.15265 | 5.00E-05 |
| ENST00000557311 | ENSG00000066427 | ATXN3 | 14:92524895-92572965 | Protein_coding_from_Ensembl | 10.2071 | 4.8791 | 0.0082 |
| ENST00000351936 | ENSG00000066468 | FGFR2 | 10:123237843-123357972 | Protein_coding_from_Ensembl | 0.977752 | 0.39544 | 0.0143 |
| ENST00000554386 | ENSG00000066629 | EML1 | 14:100204029-100408397 | Protein_coding_from_Ensembl | 2.27827 | 5.65328 | 0.0329 |
| ENST00000377838 | ENSG00000066827 | ZFAT | 8:135490030-135725292 | Protein_coding_from_Ensembl | 2.21793 | 0.72816 | 5.00E-05 |
| ENST00000566885 | ENSG00000066933 | MYO9A | 15:72110736-72447800 | Protein_coding_from_Ensembl | 0.543905 | 1.2249 | 0.00165 |
| ENST00000409824 | ENSG00000067066 | SP100 | 2:231280656-231444721 | Protein_coding_from_Ensembl | 0.599319 | 3.02104 | 0.00075 |
| ENST00000443793 | ENSG00000067646 | ZFY | Y:2803111-2870667 | Protein_coding_from_Ensembl | 1.70603 | 5.11136 | 0.0282 |
| ENST00000444450 | ENSG00000067829 | IDH3G | X:153051220-153063967 | Protein_coding_from_Ensembl | 3.78386 | 1.21466 | 0.0085 |
| ENST00000322048 | ENSG00000067836 | ROGDI | 16:4846962-4852951 | Protein_coding_from_Ensembl | 0.591563 | 2.6847 | 0.0013 |
| ENST00000352904 | ENSG00000068078 | FGFR3 | 4:1795033-1810599 | Protein_coding_from_Ensembl | 5.04265 | 1.95094 | 5.00E-05 |
| ENST00000591022 | ENSG00000068137 | PLEKHH3 | 17:40819931-40829048 | Protein_coding_from_Ensembl | 0.425947 | 1.37548 | 0.0022 |
| ENST00000557942 | ENSG00000068305 | MEF2A | 15:100017369-100273766 | Protein_coding_from_Ensembl | 3.08152 | 0.108197 | 0.0008 |
| ENST00000396743 | ENSG00000068308 | OTUD5 | X:48779304-48815648 | Protein_coding_from_Ensembl | 0.456179 | 0.937683 | 0.03845 |
| ENST00000428668 | ENSG00000068308 | OTUD5 | X:48779304-48815648 | Protein_coding_from_Ensembl | 0.8358 | 1.85867 | 0.0286 |
| ENST00000505855 | ENSG00000068366 | ACSL4 | X:108866928-108976632 | Protein_coding_from_Ensembl | 6.3206 | 2.11836 | 0.0111 |
| ENST00000368593 | ENSG00000068383 | INPP5A | 10:134351323-134598269 | Protein_coding_from_Ensembl | 2.19024 | 0.906345 | 0.01825 |
| ENST00000019019 | ENSG00000068438 | FTSJ1 | X:48334540-48344752 | Protein_coding_from_Ensembl | 0.32255 | 0.879379 | 0.04285 |
| ENST00000375645 | ENSG00000068650 | ATP11A | 13:113344642-113541482 | Protein_coding_from_Ensembl | 1.23455 | 0.366857 | 5.00E-05 |
| ENST00000432678 | ENSG00000068745 | IP6K2 | 3:48701208-49060928 | Protein_coding_from_Ensembl | 2.17027 | 0.526516 | 0.02475 |
| ENST00000340879 | ENSG00000068745 | IP6K2 | 3:48701208-49060928 | Protein_coding_from_Ensembl | 1.62805 | 5.85623 | 0.0005 |
| ENST00000402114 | ENSG00000068781 | STON1-GTF2A1L | 2:48752493-49003658 | Protein_coding_from_Ensembl | 0.67048 | 1.39674 | 0.00385 |
| ENST00000401507 | ENSG00000068796 | KIF2A | 5:61601988-61924416 | Protein_coding_from_Ensembl | 1.65042 | 3.91724 | 5.00E-05 |
| ENST00000377497 | ENSG00000068831 | RASGRP2 | 11:64494382-64512928 | Protein_coding_from_Ensembl | 2.51791 | 1.14489 | 0.0024 |
| ENST00000381766 | ENSG00000068903 | SIRT2 | 19:39369194-39399533 | Protein_coding_from_Ensembl | 0.658389 | 2.69081 | 0.0286 |
| ENST00000377432 | ENSG00000068976 | PYGM | 11:64513860-64527769 | Protein_coding_from_Ensembl | 0.530648 | 1.53652 | 0.0029 |
| ENST00000392650 | ENSG00000069188 | SDK2 | 17:71330522-71640228 | Protein_coding_from_Ensembl | 0.652958 | 1.71971 | 5.00E-05 |
| ENST00000537506 | ENSG00000069248 | NUP133 | 1:229577044-229650019 | Protein_coding_from_Ensembl | 0.323218 | 1.71082 | 0.0005 |
| ENST00000506154 | ENSG00000069869 | NEDD4 | 15:56119119-56285944 | Protein_coding_from_Ensembl | 1.33697 | 2.81205 | 5.00E-05 |
| ENST00000358784 | ENSG00000069966 | GNB5 | 15:52407273-52587995 | Protein_coding_from_Ensembl | 0.88043 | 1.84616 | 0.0233 |
| ENST00000416188 | ENSG00000070047 | PHRF1 | 11:576485-612222 | Protein_coding_from_Ensembl | 0.411451 | 1.09475 | 0.00045 |
| ENST00000481767 | ENSG00000070087 | PFN2 | 3:149478891-149942977 | Protein_coding_from_Ensembl | 1.12515 | 2.55002 | 0.00845 |
| ENST00000389709 | ENSG00000070476 | ZXDC | 3:126156443-126194762 | Protein_coding_from_Ensembl | 1.60575 | 0.748088 | 0.0026 |
| ENST00000265421 | ENSG00000070501 | POLB | 8:42195971-42229326 | Protein_coding_from_Ensembl | 1.51454 | 3.80213 | 0.00215 |
| ENST00000522720 | ENSG00000070756 | PABPC1 | 8:101698043-101744205 | Protein_coding_from_Ensembl | 1.62919 | 7.94296 | 0.0142 |
| ENST00000328736 | ENSG00000070778 | PTPN21 | 14:88851267-89021077 | Protein_coding_from_Ensembl | 4.57758 | 0.863086 | 5.00E-05 |
| ENST00000421089 | ENSG00000070831 | CDC42 | 1:22379119-22419437 | Protein_coding_from_Ensembl | 2.82096 | 1.39422 | 0.0394 |
| ENST00000415162 | ENSG00000070882 | OSBPL3 | 7:24836155-25021253 | Protein_coding_from_Ensembl | 2.91136 | 8.58313 | 0.0085 |
| ENST00000324219 | ENSG00000071054 | MAP4K4 | 2:102313311-102511150 | Protein_coding_from_Ensembl | 0.497124 | 1.00598 | 0.02775 |
| ENST00000502702 | ENSG00000071127 | WDR1 | 4:10075962-10118573 | Protein_coding_from_Ensembl | 3.7478 | 0.393714 | 0.00325 |
| ENST00000508079 | ENSG00000071127 | WDR1 | 4:10075962-10118573 | Protein_coding_from_Ensembl | 6.66921 | 1.77932 | 0.00195 |
| ENST00000397386 | ENSG00000071282 | LMCD1 | 3:7994491-8653610 | Protein_coding_from_Ensembl | 0.179744 | 4.13432 | 0.04805 |
| ENST00000585731 | ENSG00000071564 | TCF3 | 19:1609290-1652604 | Protein_coding_from_Ensembl | 2.45837 | 1.19092 | 0.0434 |
| ENST00000593064 | ENSG00000071564 | TCF3 | 19:1609290-1652604 | Protein_coding_from_Ensembl | 1.69444 | 3.68963 | 0.0169 |
| ENST00000494055 | ENSG00000071794 | HLTF | 3:148747913-148820610 | Protein_coding_from_Ensembl | 0.985686 | 0.341804 | 0.0041 |
| ENST00000447601 | ENSG00000071889 | FAM3A | X:153733349-153744566 | Protein_coding_from_Ensembl | 0.40928 | 2.06334 | 0.0044 |
| ENST00000340736 | ENSG00000072071 | LPHN1 | 19:14247964-14316999 | Protein_coding_from_Ensembl | 1.63019 | 0.357593 | 5.00E-05 |
| ENST00000555452 | ENSG00000072121 | ZFYVE26 | 14:68168602-68283307 | Protein_coding_from_Ensembl | 1.57821 | 0.716163 | 5.00E-05 |
| ENST00000347697 | ENSG00000072134 | EPN2 | 17:19118927-19240028 | Protein_coding_from_Ensembl | 1.32935 | 0.196438 | 0.00035 |
| ENST00000409808 | ENSG00000072163 | LIMS2 | 2:128395955-128439360 | Protein_coding_from_Ensembl | 0.393991 | 0.9487 | 0.0379 |
| ENST00000409286 | ENSG00000072163 | LIMS2 | 2:128395955-128439360 | Protein_coding_from_Ensembl | 1.18292 | 3.17755 | 0.0012 |
| ENST00000396695 | ENSG00000072195 | SPEG | 2:220299567-220403494 | Protein_coding_from_Ensembl | 0.22763 | 0.869008 | 0.01405 |
| ENST00000357917 | ENSG00000072422 | RHOBTB1 | 10:62629195-62761198 | Protein_coding_from_Ensembl | 1.01561 | 0.266721 | 0.00115 |
| ENST00000509502 | ENSG00000072518 | MARK2 | 11:63606399-63678491 | Protein_coding_from_Ensembl | 0.341608 | 0.980374 | 0.011 |
| ENST00000377810 | ENSG00000072518 | MARK2 | 11:63606399-63678491 | Protein_coding_from_Ensembl | 1.38637 | 3.2058 | 5.00E-05 |
| ENST00000450056 | ENSG00000072609 | CHFR | 12:133345494-133532892 | Protein_coding_from_Ensembl | 3.0749 | 0.48947 | 0.00015 |
| ENST00000379100 | ENSG00000072682 | P4HA2 | 5:131520568-131731306 | Protein_coding_from_Ensembl | 0.474357 | 1.29275 | 0.00875 |
| ENST00000360568 | ENSG00000072682 | P4HA2 | 5:131520568-131731306 | Protein_coding_from_Ensembl | 4.75421 | 1.73211 | 5.00E-05 |
| ENST00000453286 | ENSG00000072682 | P4HA2 | 5:131520568-131731306 | Protein_coding_from_Ensembl | 0.559699 | 2.46779 | 0.04525 |
| ENST00000358671 | ENSG00000072694 | FCGR2B | 1:161475219-161648444 | Protein_coding_from_Ensembl | 1.44939 | 0.37612 | 0.01545 |
| ENST00000265094 | ENSG00000072803 | FBXW11 | 5:171281659-171433877 | Protein_coding_from_Ensembl | 0.281986 | 2.02015 | 0.0002 |
| ENST00000397890 | ENSG00000072832 | CRMP1 | 4:5712923-5894785 | Protein_coding_from_Ensembl | 1.74672 | 0.283523 | 0.0017 |
| ENST00000541483 | ENSG00000072952 | MRVI1 | 11:10533224-10715535 | Protein_coding_from_Ensembl | 0.642911 | 1.38013 | 0.01545 |
| ENST00000547195 | ENSG00000072952 | MRVI1 | 11:10533224-10715535 | Protein_coding_from_Ensembl | 0.489246 | 1.69267 | 5.00E-05 |
| ENST00000504176 | ENSG00000073331 | ALPK1 | 4:113195697-113363776 | Protein_coding_from_Ensembl | 0.59171 | 2.18022 | 5.00E-05 |
| ENST00000580654 | ENSG00000073584 | SMARCE1 | 17:38781213-38821433 | Protein_coding_from_Ensembl | 1.6297 | 7.61338 | 0.00855 |
| ENST00000530542 | ENSG00000073921 | PICALM | 11:85668726-85783401 | Protein_coding_from_Ensembl | 3.5631 | 0.958548 | 0.01995 |
| ENST00000529016 | ENSG00000073921 | PICALM | 11:85668726-85783401 | Protein_coding_from_Ensembl | 0.575661 | 6.59048 | 0.0252 |
| ENST00000593945 | ENSG00000074219 | TEAD2 | 19:49834873-49891338 | Protein_coding_from_Ensembl | 1.64668 | 3.31527 | 0.0012 |
| ENST00000426649 | ENSG00000074582 | BCS1L | 2:219502638-219528166 | Protein_coding_from_Ensembl | 3.52724 | 1.04502 | 0.0283 |
| ENST00000591083 | ENSG00000074657 | ZNF532 | 18:56529831-56653712 | Protein_coding_from_Ensembl | 1.54251 | 3.2218 | 5.00E-05 |
| ENST00000263071 | ENSG00000074660 | SCARF1 | 17:1472560-1588176 | Protein_coding_from_Ensembl | 5.36395 | 2.16915 | 5.00E-05 |
| ENST00000375408 | ENSG00000074964 | ARHGEF10L | 1:17733255-18024369 | Protein_coding_from_Ensembl | 1.03845 | 2.14291 | 0.0008 |
| ENST00000261400 | ENSG00000075035 | WSCD2 | 12:108523247-108644314 | Protein_coding_from_Ensembl | 1.00329 | 0.179819 | 0.0007 |
| ENST00000374935 | ENSG00000075151 | EIF4G3 | 1:21132962-21503377 | Protein_coding_from_Ensembl | 1.02038 | 0.223861 | 0.00085 |
| ENST00000602326 | ENSG00000075151 | EIF4G3 | 1:21132962-21503377 | Protein_coding_from_Ensembl | 1.53564 | 0.382352 | 5.00E-05 |
| ENST00000356916 | ENSG00000075151 | EIF4G3 | 1:21132962-21503377 | Protein_coding_from_Ensembl | 1.14862 | 0.410417 | 0.02785 |
| ENST00000400422 | ENSG00000075151 | EIF4G3 | 1:21132962-21503377 | Protein_coding_from_Ensembl | 1.51544 | 3.4375 | 5.00E-05 |
| ENST00000445282 | ENSG00000075234 | TTC38 | 22:46546423-47134158 | Protein_coding_from_Ensembl | 0.386065 | 1.60316 | 0.0299 |
| ENST00000299355 | ENSG00000075239 | ACAT1 | 11:107879458-108018503 | Protein_coding_from_Ensembl | 0.679246 | 1.53705 | 0.04845 |
| ENST00000416682 | ENSG00000075413 | MARK3 | 14:103851728-103970168 | Protein_coding_from_Ensembl | 0.462937 | 1.05159 | 0.017 |
| ENST00000554627 | ENSG00000075413 | MARK3 | 14:103851728-103970168 | Protein_coding_from_Ensembl | 4.82686 | 1.13311 | 5.00E-05 |
| ENST00000356327 | ENSG00000075651 | PLD1 | 3:171318194-171528740 | Protein_coding_from_Ensembl | 1.22704 | 2.47267 | 5.00E-05 |
| ENST00000418087 | ENSG00000075651 | PLD1 | 3:171318194-171528740 | Protein_coding_from_Ensembl | 2.43292 | 5.93375 | 0.01935 |
| ENST00000422288 | ENSG00000075711 | DLG1 | 3:196769430-197030618 | Protein_coding_from_Ensembl | 0.3527 | 1.5833 | 0.00235 |
| ENST00000346964 | ENSG00000075711 | DLG1 | 3:196769430-197030618 | Protein_coding_from_Ensembl | 1.53818 | 3.43014 | 5.00E-05 |
| ENST00000547397 | ENSG00000075856 | SART3 | 12:108908961-108955176 | Protein_coding_from_Ensembl | 3.07611 | 1.2282 | 0.02845 |
| ENST00000228284 | ENSG00000075856 | SART3 | 12:108908961-108955176 | Protein_coding_from_Ensembl | 0.883851 | 1.85089 | 0.00105 |
| ENST00000316163 | ENSG00000076344 | RGS11 | 16:284544-333003 | Protein_coding_from_Ensembl | 0.908594 | 2.08272 | 0.00245 |
| ENST00000397979 | ENSG00000076984 | MAP2K7 | 19:7968727-7979363 | Protein_coding_from_Ensembl | 1.23145 | 0.487526 | 0.00305 |
| ENST00000160373 | ENSG00000077063 | CTTNBP2 | 7:117105837-117514193 | Protein_coding_from_Ensembl | 1.74832 | 0.532887 | 5.00E-05 |
| ENST00000395762 | ENSG00000077238 | IL4R | 16:27324988-27376099 | Protein_coding_from_Ensembl | 7.66218 | 0.766862 | 5.00E-05 |
| ENST00000380922 | ENSG00000077238 | IL4R | 16:27324988-27376099 | Protein_coding_from_Ensembl | 0.296545 | 1.22339 | 0.0043 |
| ENST00000358002 | ENSG00000077380 | DYNC1I2 | 2:172543918-172604930 | Protein_coding_from_Ensembl | 1.03481 | 3.28794 | 0.0001 |
| ENST00000410079 | ENSG00000077380 | DYNC1I2 | 2:172543918-172604930 | Protein_coding_from_Ensembl | 9.3207 | 4.55444 | 5.00E-05 |
| ENST00000511647 | ENSG00000077684 | PHF17 | 4:129730778-130037795 | Protein_coding_from_Ensembl | 2.7127 | 0.529481 | 5.00E-05 |
| ENST00000447712 | ENSG00000077782 | FGFR1 | 8:38268655-38326352 | Protein_coding_from_Ensembl | 1.17963 | 0.0612193 | 0.02835 |
| ENST00000397103 | ENSG00000077782 | FGFR1 | 8:38268655-38326352 | Protein_coding_from_Ensembl | 1.9948 | 5.52374 | 5.00E-05 |
| ENST00000532791 | ENSG00000077782 | FGFR1 | 8:38268655-38326352 | Protein_coding_from_Ensembl | 4.65995 | 10.1715 | 5.00E-05 |
| ENST00000590013 | ENSG00000078142 | PIK3C3 | 18:39535170-39667794 | Protein_coding_from_Ensembl | 1.63059 | 4.08554 | 0.03435 |
| ENST00000367121 | ENSG00000078269 | SYNJ2 | 6:158402887-158520208 | Protein_coding_from_Ensembl | 1.19282 | 0.499577 | 0.003 |
| ENST00000334743 | ENSG00000078304 | PPP2R5C | 14:102228134-102394326 | Protein_coding_from_Ensembl | 0.874147 | 3.72144 | 5.00E-05 |
| ENST00000437146 | ENSG00000078369 | GNB1 | 1:1716728-1822495 | Protein_coding_from_Ensembl | 11.5553 | 2.62319 | 0.0137 |
| ENST00000398027 | ENSG00000078487 | ZCWPW1 | 7:99998448-100031741 | Protein_coding_from_Ensembl | 1.37853 | 0.58318 | 0.00905 |
| ENST00000539524 | ENSG00000078618 | NRD1 | 1:51819934-52344477 | Protein_coding_from_Ensembl | 1.59086 | 0.386743 | 0.0023 |
| ENST00000375279 | ENSG00000078699 | CBFA2T2 | 20:32077880-32242350 | Protein_coding_from_Ensembl | 1.00276 | 0.256322 | 5.00E-05 |
| ENST00000263646 | ENSG00000078902 | TOLLIP | 11:1286246-1330884 | Protein_coding_from_Ensembl | 0.636483 | 2.13936 | 0.0009 |
| ENST00000422361 | ENSG00000079102 | RUNX1T1 | 8:92967202-93115514 | Protein_coding_from_Ensembl | 2.73211 | 1.08471 | 0.00035 |
| ENST00000409045 | ENSG00000079156 | OSBPL6 | 2:179059207-179264160 | Protein_coding_from_Ensembl | 0.37904 | 1.01553 | 0.00585 |
| ENST00000392133 | ENSG00000079246 | XRCC5 | 2:216972186-217071026 | Protein_coding_from_Ensembl | 0.48132 | 1.20163 | 0.00405 |
| ENST00000310858 | ENSG00000079308 | TNS1 | 2:218664511-218867718 | Protein_coding_from_Ensembl | 0.919021 | 2.19195 | 0.023 |
| ENST00000361544 | ENSG00000079335 | CDC14A | 1:100810032-100985833 | Protein_coding_from_Ensembl | 1.49201 | 0.201694 | 0.01065 |
| ENST00000336454 | ENSG00000079335 | CDC14A | 1:100810032-100985833 | Protein_coding_from_Ensembl | 0.564678 | 1.1643 | 0.0065 |
| ENST00000551330 | ENSG00000079387 | SENP1 | 12:48436680-48540187 | Protein_coding_from_Ensembl | 1.56171 | 0.442265 | 0.00025 |
| ENST00000573349 | ENSG00000079432 | CIC | 19:42772688-42799949 | Protein_coding_from_Ensembl | 1.03916 | 3.53196 | 0.01155 |
| ENST00000359692 | ENSG00000079805 | DNM2 | 19:10828754-10946994 | Protein_coding_from_Ensembl | 1.51514 | 3.52955 | 5.00E-05 |
| ENST00000530481 | ENSG00000079819 | EPB41L2 | 6:131160486-131384462 | Protein_coding_from_Ensembl | 0.00883449 | 4.11948 | 0.0269 |
| ENST00000525193 | ENSG00000079819 | EPB41L2 | 6:131160486-131384462 | Protein_coding_from_Ensembl | 1.06173 | 4.44575 | 5.00E-05 |
| ENST00000171111 | ENSG00000079999 | KEAP1 | 19:10596795-10614417 | Protein_coding_from_Ensembl | 3.15808 | 1.3296 | 5.00E-05 |
| ENST00000317734 | ENSG00000080189 | SLC35C2 | 20:44978166-44993043 | Protein_coding_from_Ensembl | 1.57601 | 3.31498 | 0.0009 |
| ENST00000428287 | ENSG00000080345 | RIF1 | 2:152266396-152591001 | Protein_coding_from_Ensembl | 4.39514 | 2.05399 | 5.00E-05 |
| ENST00000430328 | ENSG00000080345 | RIF1 | 2:152266396-152591001 | Protein_coding_from_Ensembl | 0.140375 | 2.88247 | 5.00E-05 |
| ENST00000541284 | ENSG00000080802 | CNOT4 | 7:135046546-135194875 | Protein_coding_from_Ensembl | 0.142148 | 2.22816 | 0.00015 |
| ENST00000557356 | ENSG00000080815 | PSEN1 | 14:73603125-73690399 | Protein_coding_from_Ensembl | 7.04095 | 1.52006 | 0.00965 |
| ENST00000424173 | ENSG00000081189 | MEF2C | 5:87803362-88771325 | Protein_coding_from_Ensembl | 0.351421 | 1.192 | 0.00015 |
| ENST00000375231 | ENSG00000081386 | ZNF510 | 9:99449337-99542614 | Protein_coding_from_Ensembl | 0.797549 | 0.169462 | 0.00275 |
| ENST00000507481 | ENSG00000081791 | KIAA0141 | 5:141303372-141321612 | Protein_coding_from_Ensembl | 0.820965 | 2.44278 | 0.00985 |
| ENST00000262188 | ENSG00000082014 | SMARCD3 | 7:150928544-150974982 | Protein_coding_from_Ensembl | 1.62619 | 0.806324 | 0.02185 |
| ENST00000410110 | ENSG00000082153 | BZW1 | 2:201542955-201688569 | Protein_coding_from_Ensembl | 2.20777 | 4.79583 | 0.00715 |
| ENST00000361499 | ENSG00000082269 | FAM135A | 6:71122530-71270877 | Protein_coding_from_Ensembl | 0.0712385 | 1.60365 | 0.01215 |
| ENST00000409184 | ENSG00000082438 | COBLL1 | 2:165505277-165705844 | Protein_coding_from_Ensembl | 4.06237 | 1.28377 | 5.00E-05 |
| ENST00000342193 | ENSG00000082438 | COBLL1 | 2:165505277-165705844 | Protein_coding_from_Ensembl | 0.618054 | 1.83607 | 5.00E-05 |
| ENST00000261464 | ENSG00000082512 | TRAF5 | 1:211499956-211548288 | Protein_coding_from_Ensembl | 0.943944 | 2.94983 | 5.00E-05 |
| ENST00000585291 | ENSG00000082641 | NFE2L1 | 17:46125690-46138849 | Protein_coding_from_Ensembl | 0.303221 | 1.30871 | 0.00165 |
| ENST00000582155 | ENSG00000082641 | NFE2L1 | 17:46125690-46138849 | Protein_coding_from_Ensembl | 2.84846 | 10.104 | 5.00E-05 |
| ENST00000397203 | ENSG00000082805 | ERC1 | 12:1021242-1605099 | Protein_coding_from_Ensembl | 5.80862 | 2.06879 | 5.00E-05 |
| ENST00000360905 | ENSG00000082805 | ERC1 | 12:1021242-1605099 | Protein_coding_from_Ensembl | 5.87271 | 2.75746 | 5.00E-05 |
| ENST00000566679 | ENSG00000083799 | CYLD | 16:50774820-50837249 | Protein_coding_from_Ensembl | 1.89528 | 0.624693 | 0.02785 |
| ENST00000536459 | ENSG00000083812 | ZNF324 | 19:58978422-58984945 | Protein_coding_from_Ensembl | 0.335381 | 0.925446 | 0.00565 |
| ENST00000373668 | ENSG00000084636 | COL16A1 | 1:32080206-32169920 | Protein_coding_from_Ensembl | 3.14517 | 1.53232 | 0.00055 |
| ENST00000395856 | ENSG00000084676 | NCOA1 | 2:24714782-24993571 | Protein_coding_from_Ensembl | 1.29106 | 0.431334 | 5.00E-05 |
| ENST00000406961 | ENSG00000084676 | NCOA1 | 2:24714782-24993571 | Protein_coding_from_Ensembl | 1.66512 | 0.827826 | 0.0001 |
| ENST00000288599 | ENSG00000084676 | NCOA1 | 2:24714782-24993571 | Protein_coding_from_Ensembl | 3.44858 | 0.968642 | 5.00E-05 |
| ENST00000405141 | ENSG00000084676 | NCOA1 | 2:24714782-24993571 | Protein_coding_from_Ensembl | 0.422105 | 1.16436 | 5.00E-05 |
| ENST00000348332 | ENSG00000084676 | NCOA1 | 2:24714782-24993571 | Protein_coding_from_Ensembl | 1.58031 | 5.31885 | 5.00E-05 |
| ENST00000303743 | ENSG00000085185 | BCORL1 | X:129115082-129192058 | Protein_coding_from_Ensembl | 0.585117 | 1.27088 | 5.00E-05 |
| ENST00000380818 | ENSG00000085231 | TAF9 | 5:68646810-68710628 | Protein_coding_from_Ensembl | 1.26886 | 2.71579 | 0.0208 |
| ENST00000264674 | ENSG00000085276 | MECOM | 3:168801286-169381406 | Protein_coding_from_Ensembl | 3.10652 | 1.3464 | 5.00E-05 |
| ENST00000369962 | ENSG00000085433 | WDR47 | 1:109512835-109584850 | Protein_coding_from_Ensembl | 2.99655 | 1.19717 | 5.00E-05 |
| ENST00000369965 | ENSG00000085433 | WDR47 | 1:109512835-109584850 | Protein_coding_from_Ensembl | 0.840458 | 2.15845 | 5.00E-05 |
| ENST00000576416 | ENSG00000085644 | ZNF213 | 16:3160460-3192806 | Protein_coding_from_Ensembl | 0.439542 | 1.49274 | 0.00855 |
| ENST00000392017 | ENSG00000085978 | ATG16L1 | 2:234118696-234204320 | Protein_coding_from_Ensembl | 2.22337 | 0.656738 | 5.00E-05 |
| ENST00000528341 | ENSG00000086991 | NOX4 | 11:89057521-89322779 | Protein_coding_from_Ensembl | 0.648692 | 2.39163 | 0.00115 |
| ENST00000393223 | ENSG00000087053 | MTMR2 | 11:95566045-95658479 | Protein_coding_from_Ensembl | 2.22993 | 0.769875 | 5.00E-05 |
| ENST00000457580 | ENSG00000087087 | SRRT | 7:100472732-100486285 | Protein_coding_from_Ensembl | 6.28055 | 2.32623 | 5.00E-05 |
| ENST00000308360 | ENSG00000087111 | PIGS | 17:26782769-26973442 | Protein_coding_from_Ensembl | 2.20945 | 0.428236 | 0.0004 |
| ENST00000375812 | ENSG00000087191 | PSMC5 | 17:61896792-61909379 | Protein_coding_from_Ensembl | 2.71041 | 6.82852 | 5.00E-05 |
| ENST00000506128 | ENSG00000087206 | UIMC1 | 5:176332005-176449634 | Protein_coding_from_Ensembl | 0.907564 | 1.93145 | 0.0136 |
| ENST00000564864 | ENSG00000087245 | MMP2 | 16:55423569-55540603 | Protein_coding_from_Ensembl | 35.6577 | 16.4615 | 0.00015 |
| ENST00000503393 | ENSG00000087266 | SH3BP2 | 4:2794749-2842825 | Protein_coding_from_Ensembl | 0.00868524 | 1.62275 | 0.0016 |
| ENST00000398129 | ENSG00000087274 | ADD1 | 4:2845583-2931803 | Protein_coding_from_Ensembl | 6.9037 | 1.56739 | 5.00E-05 |
| ENST00000221232 | ENSG00000088038 | CNOT3 | 19:54641443-54663620 | Protein_coding_from_Ensembl | 1.19383 | 0.157528 | 0.00905 |
| ENST00000600480 | ENSG00000088247 | KHSRP | 19:6413358-6424805 | Protein_coding_from_Ensembl | 1.84123 | 6.19825 | 0.00285 |
| ENST00000373945 | ENSG00000088367 | EPB41L1 | 20:34679425-34820721 | Protein_coding_from_Ensembl | 5.00816 | 1.83922 | 0.01065 |
| ENST00000449241 | ENSG00000088543 | C3orf18 | 3:50595461-50622366 | Protein_coding_from_Ensembl | 1.50755 | 0.208934 | 0.0108 |
| ENST00000216879 | ENSG00000088833 | NSFL1C | 20:1422806-1472233 | Protein_coding_from_Ensembl | 1.44562 | 0.616029 | 0.00235 |
| ENST00000476071 | ENSG00000088833 | NSFL1C | 20:1422806-1472233 | Protein_coding_from_Ensembl | 1.13048 | 2.60241 | 0.00035 |
| ENST00000419004 | ENSG00000089006 | SNX5 | 20:17922240-18039832 | Protein_coding_from_Ensembl | 1.13259 | 4.08121 | 0.04965 |
| ENST00000377768 | ENSG00000089006 | SNX5 | 20:17922240-18039832 | Protein_coding_from_Ensembl | 2.15967 | 5.21238 | 0.00025 |
| ENST00000550047 | ENSG00000089060 | SLC8B1 | 12:113736563-113827203 | Protein_coding_from_Ensembl | 1.52878 | 0.672732 | 0.00895 |
| ENST00000379299 | ENSG00000089063 | TMEM230 | 20:5080485-5093749 | Protein_coding_from_Ensembl | 2.12341 | 0.961189 | 0.01675 |
| ENST00000379283 | ENSG00000089063 | TMEM230 | 20:5080485-5093749 | Protein_coding_from_Ensembl | 0.481812 | 1.19529 | 0.03315 |
| ENST00000542973 | ENSG00000089094 | KDM2B | 12:121570621-122241812 | Protein_coding_from_Ensembl | 0.471972 | 1.99045 | 0.00125 |
| ENST00000507959 | ENSG00000089335 | ZNF302 | 19:35168543-35177302 | Protein_coding_from_Ensembl | 4.4292 | 0.861885 | 0.0072 |
| ENST00000599564 | ENSG00000089351 | GRAMD1A | 19:35485687-35517375 | Protein_coding_from_Ensembl | 1.7758 | 0.449713 | 0.00035 |
| ENST00000425114 | ENSG00000089472 | HEPH | X:65382390-65488709 | Protein_coding_from_Ensembl | 0.386082 | 0.904191 | 0.03045 |
| ENST00000399599 | ENSG00000089486 | CDIP1 | 16:4560675-4588829 | Protein_coding_from_Ensembl | 2.8164 | 1.35716 | 0.0007 |
| ENST00000262241 | ENSG00000089902 | RCOR1 | 14:103058997-103196913 | Protein_coding_from_Ensembl | 1.02401 | 0.343079 | 0.0003 |
| ENST00000557441 | ENSG00000090061 | CCNK | 14:99947505-100070363 | Protein_coding_from_Ensembl | 1.82463 | 3.76687 | 0.02935 |
| ENST00000322099 | ENSG00000090097 | PCBP4 | 3:51989329-52023213 | Protein_coding_from_Ensembl | 1.22954 | 2.95159 | 0.0006 |
| ENST00000539396 | ENSG00000090372 | STRN4 | 19:47222763-47291851 | Protein_coding_from_Ensembl | 0.412114 | 4.55558 | 5.00E-05 |
| ENST00000600615 | ENSG00000090372 | STRN4 | 19:47222763-47291851 | Protein_coding_from_Ensembl | 2.23866 | 4.68405 | 0.02745 |
| ENST00000559199 | ENSG00000090487 | SPG21 | 15:65255361-65282648 | Protein_coding_from_Ensembl | 2.36634 | 1.12567 | 0.006 |
| ENST00000204604 | ENSG00000090539 | CHRD | 3:183851806-184402546 | Protein_coding_from_Ensembl | 0.193533 | 2.83821 | 0.00285 |
| ENST00000537452 | ENSG00000090615 | GOLGA3 | 12:133345494-133532892 | Protein_coding_from_Ensembl | 8.981 | 1.79256 | 5.00E-05 |
| ENST00000545875 | ENSG00000090615 | GOLGA3 | 12:133345494-133532892 | Protein_coding_from_Ensembl | 2.1543 | 8.49072 | 5.00E-05 |
| ENST00000372856 | ENSG00000090621 | PABPC4 | 1:40026487-40042462 | Protein_coding_from_Ensembl | 0.578729 | 3.92212 | 5.00E-05 |
| ENST00000320201 | ENSG00000090975 | PITPNM2 | 12:123468026-123634562 | Protein_coding_from_Ensembl | 0.565329 | 1.58885 | 5.00E-05 |
| ENST00000346134 | ENSG00000090989 | EXOC1 | 4:56719781-56899529 | Protein_coding_from_Ensembl | 0.215954 | 1.15018 | 0.00265 |
| ENST00000546946 | ENSG00000091039 | OSBPL8 | 12:76745576-76953589 | Protein_coding_from_Ensembl | 0.634953 | 1.59337 | 0.0047 |
| ENST00000430490 | ENSG00000091073 | DTX2 | 7:76090992-76135312 | Protein_coding_from_Ensembl | 1.43725 | 3.35677 | 5.00E-05 |
| ENST00000440410 | ENSG00000091140 | DLD | 7:107531414-107643700 | Protein_coding_from_Ensembl | 2.78535 | 0.820552 | 0.0024 |
| ENST00000354411 | ENSG00000091592 | NLRP1 | 17:5402746-5522744 | Protein_coding_from_Ensembl | 1.23954 | 0.274978 | 0.00115 |
| ENST00000572272 | ENSG00000091592 | NLRP1 | 17:5402746-5522744 | Protein_coding_from_Ensembl | 0.711112 | 2.10062 | 0.0001 |
| ENST00000517585 | ENSG00000091656 | ZFHX4 | 8:77315751-77779521 | Protein_coding_from_Ensembl | 18.139 | 2.32264 | 0.0001 |
| ENST00000338312 | ENSG00000091879 | ANGPT2 | 8:6261071-6565730 | Protein_coding_from_Ensembl | 0.356209 | 1.45478 | 0.02415 |
| ENST00000383681 | ENSG00000091972 | CD200 | 3:112021320-112128049 | Protein_coding_from_Ensembl | 3.66478 | 0.151177 | 0.03645 |
| ENST00000541587 | ENSG00000092036 | HAUS4 | 14:23398817-23451851 | Protein_coding_from_Ensembl | 6.13858 | 0.617319 | 5.00E-05 |
| ENST00000206474 | ENSG00000092036 | HAUS4 | 14:23398817-23451851 | Protein_coding_from_Ensembl | 1.74143 | 5.64894 | 5.00E-05 |
| ENST00000544052 | ENSG00000092108 | SCFD1 | 14:31091317-31291908 | Protein_coding_from_Ensembl | 3.90369 | 10.5889 | 5.00E-05 |
| ENST00000438909 | ENSG00000092140 | G2E3 | 14:30907197-31089269 | Protein_coding_from_Ensembl | 0.477818 | 1.27576 | 0.0086 |
| ENST00000554539 | ENSG00000092199 | HNRNPC | 14:21677294-21737653 | Protein_coding_from_Ensembl | 3.71157 | 0.983161 | 0.03195 |
| ENST00000449098 | ENSG00000092199 | HNRNPC | 14:21677294-21737653 | Protein_coding_from_Ensembl | 5.82101 | 2.22283 | 5.00E-05 |
| ENST00000336053 | ENSG00000092199 | HNRNPC | 14:21677294-21737653 | Protein_coding_from_Ensembl | 0.88271 | 2.61562 | 0.00015 |
| ENST00000554455 | ENSG00000092199 | HNRNPC | 14:21677294-21737653 | Protein_coding_from_Ensembl | 2.53345 | 5.57786 | 0.0001 |
| ENST00000515009 | ENSG00000092421 | SEMA6A | 5:115779311-115927094 | Protein_coding_from_Ensembl | 5.58048 | 2.27633 | 0.03665 |
| ENST00000394597 | ENSG00000092871 | RFFL | 17:33332106-33448541 | Protein_coding_from_Ensembl | 1.98265 | 0.794151 | 5.00E-05 |
| ENST00000336509 | ENSG00000092931 | MFSD11 | 17:74722911-74778303 | Protein_coding_from_Ensembl | 1.99513 | 0.980949 | 0.007 |
| ENST00000591864 | ENSG00000092931 | MFSD11 | 17:74722911-74778303 | Protein_coding_from_Ensembl | 1.51177 | 5.98663 | 0.04995 |
| ENST00000330232 | ENSG00000093072 | CECR1 | 22:17660193-17702879 | Protein_coding_from_Ensembl | 2.40657 | 1.02581 | 0.00015 |
| ENST00000474289 | ENSG00000093144 | ECHDC1 | 6:127609854-127664754 | Protein_coding_from_Ensembl | 3.24694 | 0.866882 | 5.00E-05 |
| ENST00000368289 | ENSG00000093144 | ECHDC1 | 6:127609854-127664754 | Protein_coding_from_Ensembl | 5.24102 | 1.48075 | 0.0024 |
| ENST00000373383 | ENSG00000094841 | UPRT | X:74493893-74524732 | Protein_coding_from_Ensembl | 1.37581 | 0.673084 | 0.0229 |
| ENST00000397668 | ENSG00000095066 | HOOK2 | 19:12873816-12985765 | Protein_coding_from_Ensembl | 2.94203 | 0.702908 | 0.00025 |
| ENST00000359415 | ENSG00000095139 | ARCN1 | 11:118307204-118473748 | Protein_coding_from_Ensembl | 0.29343 | 1.42025 | 0.00175 |
| ENST00000429553 | ENSG00000095370 | SH2D3C | 9:130500595-130541020 | Protein_coding_from_Ensembl | 0.582111 | 1.35408 | 0.0066 |
| ENST00000375063 | ENSG00000095383 | TBC1D2 | 9:100961279-101018003 | Protein_coding_from_Ensembl | 0.650196 | 1.38354 | 0.02555 |
| ENST00000362057 | ENSG00000095397 | DFNB31 | 9:117164359-117267730 | Protein_coding_from_Ensembl | 1.02775 | 0.150713 | 0.00615 |
| ENST00000265134 | ENSG00000095397 | DFNB31 | 9:117164359-117267730 | Protein_coding_from_Ensembl | 0.265037 | 1.3894 | 0.00125 |
| ENST00000370379 | ENSG00000095485 | CWF19L1 | 10:101989423-102027437 | Protein_coding_from_Ensembl | 3.60407 | 1.57682 | 0.0327 |
| ENST00000368886 | ENSG00000095574 | IKZF5 | 10:124690418-124768366 | Protein_coding_from_Ensembl | 2.83252 | 0.838279 | 5.00E-05 |
| ENST00000224337 | ENSG00000095585 | BLNK | 10:97888811-98031344 | Protein_coding_from_Ensembl | 1.59532 | 0.562211 | 0.01065 |
| ENST00000371249 | ENSG00000095637 | SORBS1 | 10:97071527-97321171 | Protein_coding_from_Ensembl | 0.920784 | 0.147005 | 0.00015 |
| ENST00000413387 | ENSG00000095713 | CRTAC1 | 10:99609995-99790585 | Protein_coding_from_Ensembl | 5.64698 | 1.45001 | 5.00E-05 |
| ENST00000562263 | ENSG00000095906 | NUBP2 | 16:1823207-1844972 | Protein_coding_from_Ensembl | 1.00804 | 3.17526 | 0.02535 |
| ENST00000487103 | ENSG00000095951 | HIVEP1 | 6:12002390-12165232 | Protein_coding_from_Ensembl | 1.19535 | 4.21266 | 0.0284 |
| ENST00000540787 | ENSG00000096060 | FKBP5 | 6:35541361-35704724 | Protein_coding_from_Ensembl | 3.43723 | 0.693359 | 0.0107 |
| ENST00000361690 | ENSG00000096063 | SRPK1 | 6:35773069-35889119 | Protein_coding_from_Ensembl | 4.39674 | 0.857781 | 5.00E-05 |
| ENST00000423325 | ENSG00000096063 | SRPK1 | 6:35773069-35889119 | Protein_coding_from_Ensembl | 0.451472 | 1.19785 | 0.001 |
| ENST00000373825 | ENSG00000096063 | SRPK1 | 6:35773069-35889119 | Protein_coding_from_Ensembl | 0.453861 | 3.45023 | 5.00E-05 |
| ENST00000433625 | ENSG00000096093 | EFHC1 | 6:52283222-52441713 | Protein_coding_from_Ensembl | 0.339714 | 1.44538 | 0.01815 |
| ENST00000377842 | ENSG00000097021 | ACOT7 | 1:6324328-6454451 | Protein_coding_from_Ensembl | 1.1355 | 0.317131 | 0.02945 |
| ENST00000353250 | ENSG00000099377 | HSD3B7 | 16:30996518-31000473 | Protein_coding_from_Ensembl | 1.84809 | 0.151917 | 0.03485 |
| ENST00000591659 | ENSG00000099622 | CIRBP | 19:1259383-1274879 | Protein_coding_from_Ensembl | 2.29438 | 5.5944 | 0.0411 |
| ENST00000444172 | ENSG00000099622 | CIRBP | 19:1259383-1274879 | Protein_coding_from_Ensembl | 24.1397 | 10.4167 | 5.00E-05 |
| ENST00000600092 | ENSG00000099783 | HNRNPM | 19:8130285-8553998 | Protein_coding_from_Ensembl | 8.52717 | 3.21222 | 0.00035 |
| ENST00000348943 | ENSG00000099783 | HNRNPM | 19:8130285-8553998 | Protein_coding_from_Ensembl | 1.51902 | 4.42115 | 5.00E-05 |
| ENST00000440659 | ENSG00000099910 | KLHL22 | 22:20778873-20850170 | Protein_coding_from_Ensembl | 0.88191 | 1.95308 | 0.006 |
| ENST00000389355 | ENSG00000099949 | LZTR1 | 22:21319395-21353327 | Protein_coding_from_Ensembl | 2.95819 | 0.722797 | 5.00E-05 |
| ENST00000317582 | ENSG00000099968 | BCL2L13 | 22:18111620-18213621 | Protein_coding_from_Ensembl | 3.03165 | 1.45053 | 0.0003 |
| ENST00000355028 | ENSG00000099968 | BCL2L13 | 22:18111620-18213621 | Protein_coding_from_Ensembl | 0.0914097 | 1.82948 | 0.0176 |
| ENST00000393906 | ENSG00000099992 | TBC1D10A | 22:30681105-30723035 | Protein_coding_from_Ensembl | 1.73373 | 0.197678 | 0.01 |
| ENST00000263112 | ENSG00000099998 | GGT5 | 22:24615621-24641110 | Protein_coding_from_Ensembl | 5.53145 | 1.75921 | 5.00E-05 |
| ENST00000398831 | ENSG00000100023 | PPIL2 | 22:22006493-22090123 | Protein_coding_from_Ensembl | 3.91864 | 1.92058 | 0.0001 |
| ENST00000402849 | ENSG00000100028 | SNRPD3 | 22:24936028-25024972 | Protein_coding_from_Ensembl | 4.29107 | 13.2577 | 0.00105 |
| ENST00000538191 | ENSG00000100034 | PPM1F | 22:22273792-22307209 | Protein_coding_from_Ensembl | 1.63216 | 0.368478 | 0.01575 |
| ENST00000457270 | ENSG00000100038 | TOP3B | 22:22311396-22337213 | Protein_coding_from_Ensembl | 0.282507 | 1.09293 | 0.003 |
| ENST00000325180 | ENSG00000100083 | GGA1 | 22:38004480-38029571 | Protein_coding_from_Ensembl | 0.967 | 3.14762 | 5.00E-05 |
| ENST00000406772 | ENSG00000100083 | GGA1 | 22:38004480-38029571 | Protein_coding_from_Ensembl | 1.33163 | 3.78782 | 5.00E-05 |
| ENST00000441972 | ENSG00000100100 | PIK3IP1 | 22:31677578-31742218 | Protein_coding_from_Ensembl | 1.9608 | 0.70017 | 0.00145 |
| ENST00000405309 | ENSG00000100105 | PATZ1 | 22:31677578-31742218 | Protein_coding_from_Ensembl | 1.53606 | 0.617426 | 0.0013 |
| ENST00000351933 | ENSG00000100105 | PATZ1 | 22:31677578-31742218 | Protein_coding_from_Ensembl | 1.3372 | 3.01288 | 5.00E-05 |
| ENST00000451427 | ENSG00000100129 | EIF3L | 22:38226861-38285414 | Protein_coding_from_Ensembl | 1.77685 | 5.70309 | 0.02345 |
| ENST00000407936 | ENSG00000100142 | POLR2F | 22:38339527-38439988 | Protein_coding_from_Ensembl | 5.62015 | 14.7886 | 0.0005 |
| ENST00000400249 | ENSG00000100150 | DEPDC5 | 22:32149943-32303012 | Protein_coding_from_Ensembl | 0.560083 | 2.30664 | 5.00E-05 |
| ENST00000456626 | ENSG00000100221 | JOSD1 | 22:39081547-39097561 | Protein_coding_from_Ensembl | 2.45839 | 0.860322 | 0.0353 |
| ENST00000348911 | ENSG00000100241 | SBF1 | 22:50781732-50913454 | Protein_coding_from_Ensembl | 4.66536 | 1.95954 | 5.00E-05 |
| ENST00000390679 | ENSG00000100241 | SBF1 | 22:50781732-50913454 | Protein_coding_from_Ensembl | 0.844809 | 4.32776 | 5.00E-05 |
| ENST00000406622 | ENSG00000100242 | SUN2 | 22:39101727-39190203 | Protein_coding_from_Ensembl | 0.680361 | 1.39164 | 0.0209 |
| ENST00000216080 | ENSG00000100258 | LMF2 | 22:50941375-50946135 | Protein_coding_from_Ensembl | 3.18831 | 1.32977 | 0.00015 |
| ENST00000403744 | ENSG00000100266 | PACSIN2 | 22:43192507-43411151 | Protein_coding_from_Ensembl | 1.2101 | 3.34393 | 0.0004 |
| ENST00000402502 | ENSG00000100280 | AP1B1 | 22:29723668-29819182 | Protein_coding_from_Ensembl | 1.389 | 2.93117 | 0.00015 |
| ENST00000420166 | ENSG00000100281 | HMGXB4 | 22:35653444-35691800 | Protein_coding_from_Ensembl | 1.9808 | 0.839012 | 0.03205 |
| ENST00000381551 | ENSG00000100311 | PDGFB | 22:39619363-39640756 | Protein_coding_from_Ensembl | 1.08707 | 3.34543 | 0.0029 |
| ENST00000449924 | ENSG00000100320 | RBFOX2 | 22:36134782-36424473 | Protein_coding_from_Ensembl | 2.69398 | 1.02535 | 0.0043 |
| ENST00000416721 | ENSG00000100320 | RBFOX2 | 22:36134782-36424473 | Protein_coding_from_Ensembl | 1.41648 | 3.53846 | 0.00855 |
| ENST00000429038 | ENSG00000100336 | APOL4 | 22:36585171-36600886 | Protein_coding_from_Ensembl | 4.22168 | 1.02014 | 5.00E-05 |
| ENST00000426053 | ENSG00000100342 | APOL1 | 22:36649055-36663583 | Protein_coding_from_Ensembl | 1.08389 | 2.74027 | 0.0001 |
| ENST00000432675 | ENSG00000100353 | EIF3D | 22:36906896-36925483 | Protein_coding_from_Ensembl | 5.15652 | 2.45786 | 0.03355 |
| ENST00000391627 | ENSG00000100364 | KIAA0930 | 22:45586218-45636650 | Protein_coding_from_Ensembl | 5.55136 | 2.32378 | 5.00E-05 |
| ENST00000435456 | ENSG00000100372 | SLC25A17 | 22:40742506-41215403 | Protein_coding_from_Ensembl | 0.671818 | 1.38743 | 0.0299 |
| ENST00000351589 | ENSG00000100403 | ZC3H7B | 22:41697525-41756151 | Protein_coding_from_Ensembl | 2.49573 | 0.560228 | 5.00E-05 |
| ENST00000355209 | ENSG00000100413 | POLR3H | 22:41865128-41940610 | Protein_coding_from_Ensembl | 0.744507 | 3.73143 | 5.00E-05 |
| ENST00000554698 | ENSG00000100445 | SDR39U1 | 14:24895737-24912111 | Protein_coding_from_Ensembl | 0.398507 | 1.38672 | 0.04215 |
| ENST00000542016 | ENSG00000100461 | RBM23 | 14:23369853-23388393 | Protein_coding_from_Ensembl | 0.378287 | 1.13488 | 0.02685 |
| ENST00000397441 | ENSG00000100462 | PRMT5 | 14:23388664-23398794 | Protein_coding_from_Ensembl | 3.8535 | 1.60351 | 5.00E-05 |
| ENST00000554910 | ENSG00000100462 | PRMT5 | 14:23388664-23398794 | Protein_coding_from_Ensembl | 3.9532 | 1.6166 | 0.04415 |
| ENST00000389869 | ENSG00000100503 | NIN | 14:51163431-51413305 | Protein_coding_from_Ensembl | 2.74828 | 0.747298 | 5.00E-05 |
| ENST00000530997 | ENSG00000100503 | NIN | 14:51163431-51413305 | Protein_coding_from_Ensembl | 0.151125 | 1.33065 | 0.0002 |
| ENST00000216442 | ENSG00000100554 | ATP6V1D | 14:67707825-67853233 | Protein_coding_from_Ensembl | 1.10524 | 2.47074 | 0.0057 |
| ENST00000554636 | ENSG00000100568 | VTI1B | 14:68086514-68162531 | Protein_coding_from_Ensembl | 1.86236 | 6.70674 | 0.0122 |
| ENST00000395159 | ENSG00000100575 | TIMM9 | 14:58862633-59015216 | Protein_coding_from_Ensembl | 1.56791 | 0.712546 | 0.04635 |
| ENST00000556134 | ENSG00000100578 | KIAA0586 | 14:58862633-59015216 | Protein_coding_from_Ensembl | 1.22185 | 2.95546 | 5.00E-05 |
| ENST00000557154 | ENSG00000100650 | SRSF5 | 14:70193616-70238722 | Protein_coding_from_Ensembl | 2.59497 | 6.25299 | 0.00015 |
| ENST00000393063 | ENSG00000100697 | DICER1 | 14:95552564-95646327 | Protein_coding_from_Ensembl | 2.38153 | 5.6016 | 5.00E-05 |
| ENST00000556158 | ENSG00000100722 | ZC3H14 | 14:89029252-89259171 | Protein_coding_from_Ensembl | 4.96368 | 2.27815 | 0.01305 |
| ENST00000555181 | ENSG00000100744 | GSKIP | 14:96747594-96853625 | Protein_coding_from_Ensembl | 0.523108 | 1.05713 | 0.04915 |
| ENST00000299088 | ENSG00000100802 | C14orf93 | 14:23451906-23479375 | Protein_coding_from_Ensembl | 0.757773 | 3.18667 | 5.00E-05 |
| ENST00000353689 | ENSG00000100814 | CCNB1IP1 | 14:20779526-20801471 | Protein_coding_from_Ensembl | 1.557 | 4.0228 | 0.00275 |
| ENST00000555414 | ENSG00000100823 | APEX1 | 14:20923349-20929771 | Protein_coding_from_Ensembl | 3.78503 | 1.05582 | 0.0007 |
| ENST00000553681 | ENSG00000100823 | APEX1 | 14:20923349-20929771 | Protein_coding_from_Ensembl | 2.39249 | 10.097 | 5.00E-05 |
| ENST00000345122 | ENSG00000100852 | ARHGAP5 | 14:32543520-32628934 | Protein_coding_from_Ensembl | 0.0786315 | 1.84363 | 5.00E-05 |
| ENST00000557140 | ENSG00000100906 | NFKBIA | 14:35870716-35873955 | Protein_coding_from_Ensembl | 3.14333 | 0.538568 | 0.0049 |
| ENST00000557854 | ENSG00000100938 | GMPR2 | 14:24641061-24708448 | Protein_coding_from_Ensembl | 2.8054 | 0.155882 | 0.028 |
| ENST00000355299 | ENSG00000100938 | GMPR2 | 14:24641061-24708448 | Protein_coding_from_Ensembl | 5.26705 | 1.5091 | 5.00E-05 |
| ENST00000348719 | ENSG00000100938 | GMPR2 | 14:24641061-24708448 | Protein_coding_from_Ensembl | 0.143887 | 1.87485 | 0.04205 |
| ENST00000558483 | ENSG00000100938 | GMPR2 | 14:24641061-24708448 | Protein_coding_from_Ensembl | 0.968001 | 2.83826 | 0.03805 |
| ENST00000553879 | ENSG00000100968 | NFATC4 | 14:24834878-24848810 | Protein_coding_from_Ensembl | 2.70532 | 0.187296 | 0.00355 |
| ENST00000250373 | ENSG00000100968 | NFATC4 | 14:24834878-24848810 | Protein_coding_from_Ensembl | 1.10424 | 3.36161 | 5.00E-05 |
| ENST00000432634 | ENSG00000100991 | TRPC4AP | 20:33563205-33680674 | Protein_coding_from_Ensembl | 1.84341 | 0.170985 | 0.01005 |
| ENST00000539834 | ENSG00000100991 | TRPC4AP | 20:33563205-33680674 | Protein_coding_from_Ensembl | 0.89804 | 0.202752 | 0.04525 |
| ENST00000352431 | ENSG00000101040 | ZMYND8 | 20:45837858-46415712 | Protein_coding_from_Ensembl | 1.55085 | 0.708456 | 0.00625 |
| ENST00000471951 | ENSG00000101040 | ZMYND8 | 20:45837858-46415712 | Protein_coding_from_Ensembl | 1.08176 | 3.22602 | 5.00E-05 |
| ENST00000372819 | ENSG00000101104 | PABPC1L | 20:43538702-43589127 | Protein_coding_from_Ensembl | 1.13274 | 0.207917 | 0.0139 |
| ENST00000429339 | ENSG00000101146 | RAE1 | 20:55926065-55954267 | Protein_coding_from_Ensembl | 7.47904 | 2.41329 | 0.01195 |
| ENST00000370351 | ENSG00000101194 | SLC17A9 | 20:61584051-61599949 | Protein_coding_from_Ensembl | 1.12047 | 2.42465 | 0.00155 |
| ENST00000549047 | ENSG00000101199 | ARFGAP1 | 20:61904136-61921142 | Protein_coding_from_Ensembl | 2.62445 | 0.919669 | 0.0199 |
| ENST00000358395 | ENSG00000101236 | RNF24 | 20:3907955-3996229 | Protein_coding_from_Ensembl | 0.594334 | 1.84184 | 0.00035 |
| ENST00000609142 | ENSG00000101246 | ARFRP1 | 20:62289162-62374858 | Protein_coding_from_Ensembl | 1.0333 | 0.275841 | 0.0462 |
| ENST00000463598 | ENSG00000101247 | NDUFAF5 | 20:13765595-13799067 | Protein_coding_from_Ensembl | 0.683984 | 1.8877 | 0.03485 |
| ENST00000381873 | ENSG00000101298 | SNPH | 20:1206699-1289972 | Protein_coding_from_Ensembl | 1.36011 | 0.223371 | 0.0004 |
| ENST00000381867 | ENSG00000101298 | SNPH | 20:1206699-1289972 | Protein_coding_from_Ensembl | 0.671453 | 1.47002 | 0.0002 |
| ENST00000262544 | ENSG00000101310 | SEC23B | 20:18488136-18542059 | Protein_coding_from_Ensembl | 1.91308 | 0.268054 | 0.00015 |
| ENST00000450074 | ENSG00000101310 | SEC23B | 20:18488136-18542059 | Protein_coding_from_Ensembl | 2.06287 | 0.404455 | 0.0136 |
| ENST00000520553 | ENSG00000101336 | HCK | 20:30639990-30755061 | Protein_coding_from_Ensembl | 5.35851 | 2.32139 | 5.00E-05 |
| ENST00000375852 | ENSG00000101336 | HCK | 20:30639990-30755061 | Protein_coding_from_Ensembl | 1.82238 | 5.20787 | 5.00E-05 |
| ENST00000375730 | ENSG00000101346 | POFUT1 | 20:30795682-30826470 | Protein_coding_from_Ensembl | 0.362984 | 1.19644 | 0.0316 |
| ENST00000447138 | ENSG00000101474 | APMAP | 20:24943560-24973615 | Protein_coding_from_Ensembl | 0.208291 | 3.45245 | 0.0125 |
| ENST00000584294 | ENSG00000101577 | LPIN2 | 18:2916991-3013313 | Protein_coding_from_Ensembl | 3.41828 | 0.92611 | 0.0088 |
| ENST00000325971 | ENSG00000101639 | CEP192 | 18:12991360-13125051 | Protein_coding_from_Ensembl | 0.0215647 | 1.58808 | 0.04965 |
| ENST00000262173 | ENSG00000101654 | RNMT | 18:13663345-13764557 | Protein_coding_from_Ensembl | 4.235 | 0.21143 | 5.00E-05 |
| ENST00000577501 | ENSG00000101782 | RIOK3 | 18:21032786-21066567 | Protein_coding_from_Ensembl | 0.445521 | 2.13217 | 0.0027 |
| ENST00000379059 | ENSG00000101868 | POLA1 | X:24712035-25015103 | Protein_coding_from_Ensembl | 0.979799 | 0.0713423 | 0.01555 |
| ENST00000380785 | ENSG00000101871 | MID1 | X:10413349-10851773 | Protein_coding_from_Ensembl | 1.52105 | 0.45033 | 5.00E-05 |
| ENST00000413894 | ENSG00000101871 | MID1 | X:10413349-10851773 | Protein_coding_from_Ensembl | 0.591615 | 1.43526 | 0.0293 |
| ENST00000380780 | ENSG00000101871 | MID1 | X:10413349-10851773 | Protein_coding_from_Ensembl | 0.938857 | 2.12784 | 5.00E-05 |
| ENST00000218054 | ENSG00000101938 | CHRDL1 | X:109917083-110039286 | Protein_coding_from_Ensembl | 2.36201 | 0.679697 | 5.00E-05 |
| ENST00000444321 | ENSG00000101938 | CHRDL1 | X:109917083-110039286 | Protein_coding_from_Ensembl | 1.72945 | 4.36226 | 0.0001 |
| ENST00000376322 | ENSG00000102007 | PLP2 | X:49028272-49042845 | Protein_coding_from_Ensembl | 6.2113 | 2.71128 | 0.01915 |
| ENST00000404022 | ENSG00000102054 | RBBP7 | X:16804549-16888537 | Protein_coding_from_Ensembl | 1.24833 | 4.9293 | 5.00E-05 |
| ENST00000370470 | ENSG00000102081 | FMR1 | X:146990948-147032647 | Protein_coding_from_Ensembl | 2.88056 | 1.18463 | 0.0024 |
| ENST00000247138 | ENSG00000102100 | SLC35A2 | X:48760458-48769235 | Protein_coding_from_Ensembl | 0.463429 | 1.44955 | 0.0287 |
| ENST00000447146 | ENSG00000102103 | PQBP1 | X:48750729-48760420 | Protein_coding_from_Ensembl | 6.12797 | 2.79114 | 0.0025 |
| ENST00000537599 | ENSG00000102174 | PHEX | X:22050558-22269427 | Protein_coding_from_Ensembl | 0.518179 | 1.72373 | 0.00125 |
| ENST00000357227 | ENSG00000102225 | CDK16 | X:47077258-47089396 | Protein_coding_from_Ensembl | 1.92685 | 4.00171 | 5.00E-05 |
| ENST00000374928 | ENSG00000102349 | KLF8 | X:56258853-56315265 | Protein_coding_from_Ensembl | 0.536483 | 1.23059 | 0.0012 |
| ENST00000372989 | ENSG00000102362 | SYTL4 | X:99929124-99987110 | Protein_coding_from_Ensembl | 1.04345 | 2.32979 | 5.00E-05 |
| ENST00000429979 | ENSG00000102445 | KIAA0226L | 13:46916138-47012325 | Protein_coding_from_Ensembl | 0.766094 | 1.72635 | 0.0003 |
| ENST00000541916 | ENSG00000102531 | FNDC3A | 13:49550047-49783915 | Protein_coding_from_Ensembl | 7.0051 | 3.31354 | 5.00E-05 |
| ENST00000409308 | ENSG00000102547 | CAB39L | 13:49882785-50069138 | Protein_coding_from_Ensembl | 1.266 | 3.43867 | 5.00E-05 |
| ENST00000375737 | ENSG00000102606 | ARHGEF7 | 13:111748184-111958084 | Protein_coding_from_Ensembl | 3.44657 | 0.350803 | 0.0002 |
| ENST00000426768 | ENSG00000102606 | ARHGEF7 | 13:111748184-111958084 | Protein_coding_from_Ensembl | 5.66274 | 1.94585 | 0.0375 |
| ENST00000311234 | ENSG00000102786 | INTS6 | 13:51909908-52126500 | Protein_coding_from_Ensembl | 0.477633 | 2.0097 | 0.0001 |
| ENST00000486556 | ENSG00000102871 | TRADD | 16:67188082-67203848 | Protein_coding_from_Ensembl | 1.54995 | 3.61655 | 0.0011 |
| ENST00000439021 | ENSG00000102897 | LYRM1 | 16:20621564-20936328 | Protein_coding_from_Ensembl | 3.95955 | 1.10377 | 0.0003 |
| ENST00000568656 | ENSG00000102900 | NUP93 | 16:56764016-56880792 | Protein_coding_from_Ensembl | 2.64612 | 5.31345 | 0.0465 |
| ENST00000393742 | ENSG00000102908 | NFAT5 | 16:69598996-69738569 | Protein_coding_from_Ensembl | 3.61155 | 0.754907 | 5.00E-05 |
| ENST00000535559 | ENSG00000102935 | ZNF423 | 16:49521434-49891830 | Protein_coding_from_Ensembl | 1.30231 | 2.66107 | 5.00E-05 |
| ENST00000568615 | ENSG00000103035 | PSMD7 | 16:74330672-74403724 | Protein_coding_from_Ensembl | 1.45915 | 3.12016 | 0.04025 |
| ENST00000567958 | ENSG00000103035 | PSMD7 | 16:74330672-74403724 | Protein_coding_from_Ensembl | 10.5972 | 4.85677 | 0.0023 |
| ENST00000570101 | ENSG00000103042 | SLC38A7 | 16:58699012-58719008 | Protein_coding_from_Ensembl | 0.293987 | 1.04348 | 0.00055 |
| ENST00000393612 | ENSG00000103051 | COG4 | 16:70514470-70557468 | Protein_coding_from_Ensembl | 0.991698 | 3.9286 | 0.0046 |
| ENST00000564708 | ENSG00000103064 | SLC7A6 | 16:68298422-68344849 | Protein_coding_from_Ensembl | 0.934363 | 3.83653 | 0.045 |
| ENST00000262320 | ENSG00000103126 | AXIN1 | 16:337439-402673 | Protein_coding_from_Ensembl | 1.0532 | 2.49046 | 0.0001 |
| ENST00000436333 | ENSG00000103152 | MPG | 16:127005-188859 | Protein_coding_from_Ensembl | 4.55117 | 0.862883 | 0.0084 |
| ENST00000541676 | ENSG00000103168 | TAF1C | 16:84178864-84220669 | Protein_coding_from_Ensembl | 0.374993 | 0.896653 | 0.012 |
| ENST00000378541 | ENSG00000103168 | TAF1C | 16:84178864-84220669 | Protein_coding_from_Ensembl | 0.162594 | 1.21496 | 0.00235 |
| ENST00000564567 | ENSG00000103196 | CRISPLD2 | 16:84853589-84954374 | Protein_coding_from_Ensembl | 1.79504 | 4.18836 | 0.0013 |
| ENST00000219542 | ENSG00000103260 | METRN | 16:765114-769655 | Protein_coding_from_Ensembl | 1.51239 | 3.24137 | 0.03095 |
| ENST00000219548 | ENSG00000103266 | STUB1 | 16:730223-734529 | Protein_coding_from_Ensembl | 1.01185 | 3.47648 | 0.0011 |
| ENST00000568849 | ENSG00000103342 | GSPT1 | 16:11945443-12009939 | Protein_coding_from_Ensembl | 0.864231 | 3.2973 | 0.0244 |
| ENST00000567264 | ENSG00000103353 | UBFD1 | 16:23533333-23585710 | Protein_coding_from_Ensembl | 4.83333 | 0.870608 | 0.0128 |
| ENST00000431375 | ENSG00000103423 | DNAJA3 | 16:4475805-4506776 | Protein_coding_from_Ensembl | 2.10872 | 0.232408 | 0.0352 |
| ENST00000448516 | ENSG00000103510 | KAT8 | 16:31127074-31142714 | Protein_coding_from_Ensembl | 2.63172 | 1.30277 | 0.0065 |
| ENST00000417362 | ENSG00000103544 | C16orf62 | 16:19566561-19897489 | Protein_coding_from_Ensembl | 1.84367 | 0.444452 | 0.00105 |
| ENST00000543152 | ENSG00000103544 | C16orf62 | 16:19566561-19897489 | Protein_coding_from_Ensembl | 1.14962 | 0.534117 | 0.01275 |
| ENST00000565931 | ENSG00000103549 | RNF40 | 16:30709027-30787628 | Protein_coding_from_Ensembl | 3.21193 | 9.84667 | 0.0146 |
| ENST00000439220 | ENSG00000103653 | CSK | 15:75074397-75095539 | Protein_coding_from_Ensembl | 9.09754 | 4.44408 | 5.00E-05 |
| ENST00000309470 | ENSG00000103653 | CSK | 15:75074397-75095539 | Protein_coding_from_Ensembl | 1.87901 | 4.78894 | 5.00E-05 |
| ENST00000421977 | ENSG00000103710 | RASL12 | 15:65337707-65369028 | Protein_coding_from_Ensembl | 0.186602 | 1.01408 | 0.0384 |
| ENST00000394136 | ENSG00000103852 | TTC23 | 15:99676527-99791428 | Protein_coding_from_Ensembl | 3.95394 | 1.72261 | 5.00E-05 |
| ENST00000261755 | ENSG00000103876 | FAH | 15:80444831-80479288 | Protein_coding_from_Ensembl | 3.01441 | 1.4477 | 0.01 |
| ENST00000356249 | ENSG00000103888 | KIAA1199 | 15:81071683-81282219 | Protein_coding_from_Ensembl | 2.45362 | 1.1999 | 5.00E-05 |
| ENST00000559829 | ENSG00000104043 | ATP8B4 | 15:50150434-50528592 | Protein_coding_from_Ensembl | 1.07808 | 0.0931404 | 0.0082 |
| ENST00000521198 | ENSG00000104205 | SGK3 | 8:67579830-67774257 | Protein_coding_from_Ensembl | 0.916245 | 0.22122 | 0.0094 |
| ENST00000521545 | ENSG00000104341 | LAPTM4B | 8:98787284-98865241 | Protein_coding_from_Ensembl | 4.13222 | 0.91634 | 0.00635 |
| ENST00000352041 | ENSG00000104368 | PLAT | 8:42032235-42065242 | Protein_coding_from_Ensembl | 0.706448 | 1.87776 | 0.0024 |
| ENST00000519510 | ENSG00000104368 | PLAT | 8:42032235-42065242 | Protein_coding_from_Ensembl | 1.27199 | 3.58774 | 0.0002 |
| ENST00000521694 | ENSG00000104368 | PLAT | 8:42032235-42065242 | Protein_coding_from_Ensembl | 0.954729 | 6.36749 | 0.0221 |
| ENST00000220822 | ENSG00000104381 | GDAP1 | 8:75146934-75401107 | Protein_coding_from_Ensembl | 1.35834 | 0.356492 | 0.0004 |
| ENST00000220856 | ENSG00000104415 | WISP1 | 8:134203281-134243932 | Protein_coding_from_Ensembl | 1.86077 | 0.644723 | 0.03435 |
| ENST00000519533 | ENSG00000104472 | CHRAC1 | 8:141521396-141527252 | Protein_coding_from_Ensembl | 0.265933 | 1.26496 | 0.01735 |
| ENST00000353788 | ENSG00000104497 | SNX16 | 8:82704057-82755101 | Protein_coding_from_Ensembl | 0.827737 | 0.236657 | 0.01715 |
| ENST00000396330 | ENSG00000104497 | SNX16 | 8:82704057-82755101 | Protein_coding_from_Ensembl | 0.554374 | 1.37503 | 0.002 |
| ENST00000529272 | ENSG00000104529 | EEF1D | 8:144655659-144682485 | Protein_coding_from_Ensembl | 5.43131 | 2.1025 | 0.00085 |
| ENST00000534380 | ENSG00000104529 | EEF1D | 8:144655659-144682485 | Protein_coding_from_Ensembl | 2.55853 | 9.45573 | 5.00E-05 |
| ENST00000518799 | ENSG00000104613 | INTS10 | 8:19674650-19709594 | Protein_coding_from_Ensembl | 7.04026 | 1.36048 | 0.02925 |
| ENST00000526292 | ENSG00000104643 | MTMR9 | 8:11141924-11189717 | Protein_coding_from_Ensembl | 0.562443 | 1.29332 | 0.03115 |
| ENST00000519952 | ENSG00000104679 | R3HCC1 | 8:23127632-23153792 | Protein_coding_from_Ensembl | 2.02442 | 0.733048 | 0.04285 |
| ENST00000506802 | ENSG00000104723 | TUSC3 | 8:15274723-15624158 | Protein_coding_from_Ensembl | 2.0054 | 5.29968 | 5.00E-05 |
| ENST00000600909 | ENSG00000104783 | KCNN4 | 19:44270684-44285409 | Protein_coding_from_Ensembl | 1.71712 | 0.682845 | 0.04275 |
| ENST00000392079 | ENSG00000104825 | NFKBIB | 19:39369194-39399533 | Protein_coding_from_Ensembl | 3.22787 | 0.193079 | 0.01935 |
| ENST00000572515 | ENSG00000104825 | NFKBIB | 19:39369194-39399533 | Protein_coding_from_Ensembl | 0.3698 | 1.19002 | 0.017 |
| ENST00000541297 | ENSG00000104853 | CLPTM1 | 19:45457841-45496599 | Protein_coding_from_Ensembl | 1.02089 | 0.408535 | 0.01345 |
| ENST00000588673 | ENSG00000104904 | OAZ1 | 19:2252250-2273487 | Protein_coding_from_Ensembl | 0.636272 | 2.11031 | 0.0402 |
| ENST00000343587 | ENSG00000104915 | STX10 | 19:13254871-13265722 | Protein_coding_from_Ensembl | 0.519329 | 1.92516 | 0.027 |
| ENST00000343373 | ENSG00000104936 | DMPK | 19:46268042-46296060 | Protein_coding_from_Ensembl | 1.25002 | 2.53728 | 0.0006 |
| ENST00000586839 | ENSG00000104964 | AES | 19:3052907-3063105 | Protein_coding_from_Ensembl | 4.68533 | 2.27642 | 0.0143 |
| ENST00000594092 | ENSG00000105053 | VRK3 | 19:50479723-50570050 | Protein_coding_from_Ensembl | 1.13716 | 0.427116 | 0.0433 |
| ENST00000264833 | ENSG00000105088 | OLFM2 | 19:9964393-10047228 | Protein_coding_from_Ensembl | 0.359525 | 1.4142 | 0.00985 |
| ENST00000323039 | ENSG00000105204 | DYRK1B | 19:40315989-40324841 | Protein_coding_from_Ensembl | 0.594116 | 1.43737 | 0.00675 |
| ENST00000409281 | ENSG00000105223 | PLD3 | 19:40825442-40896094 | Protein_coding_from_Ensembl | 1.71006 | 10.3061 | 5.00E-05 |
| ENST00000598773 | ENSG00000105245 | NUMBL | 19:41172595-41196877 | Protein_coding_from_Ensembl | 1.56861 | 6.28782 | 0.0016 |
| ENST00000221855 | ENSG00000105254 | TBCB | 19:36602103-36616849 | Protein_coding_from_Ensembl | 0.893601 | 2.08935 | 0.01725 |
| ENST00000433867 | ENSG00000105287 | PRKD2 | 19:47150868-47220384 | Protein_coding_from_Ensembl | 1.20847 | 2.46183 | 0.0003 |
| ENST00000585479 | ENSG00000105355 | PLIN3 | 19:4838343-4867780 | Protein_coding_from_Ensembl | 0.356456 | 2.10225 | 0.00625 |
| ENST00000307422 | ENSG00000105364 | MRPL4 | 19:10362576-10399695 | Protein_coding_from_Ensembl | 2.85567 | 0.521357 | 0.00805 |
| ENST00000590669 | ENSG00000105364 | MRPL4 | 19:10362576-10399695 | Protein_coding_from_Ensembl | 0.256125 | 0.953611 | 0.04555 |
| ENST00000592514 | ENSG00000105364 | MRPL4 | 19:10362576-10399695 | Protein_coding_from_Ensembl | 0.547053 | 2.06442 | 0.02265 |
| ENST00000529370 | ENSG00000105397 | TYK2 | 19:10461208-10491352 | Protein_coding_from_Ensembl | 2.0313 | 4.80137 | 5.00E-05 |
| ENST00000441740 | ENSG00000105419 | MEIS3 | 19:47906364-47922780 | Protein_coding_from_Ensembl | 2.26487 | 0.614813 | 0.0034 |
| ENST00000357368 | ENSG00000105426 | PTPRS | 19:5158505-5340814 | Protein_coding_from_Ensembl | 0.398724 | 2.11216 | 5.00E-05 |
| ENST00000592099 | ENSG00000105426 | PTPRS | 19:5158505-5340814 | Protein_coding_from_Ensembl | 1.92712 | 4.35589 | 5.00E-05 |
| ENST00000378073 | ENSG00000105429 | MEGF8 | 19:42829760-42882921 | Protein_coding_from_Ensembl | 0.51875 | 1.12182 | 0.02115 |
| ENST00000597017 | ENSG00000105438 | KDELR1 | 19:48885826-48894810 | Protein_coding_from_Ensembl | 0.712288 | 2.34966 | 0.00485 |
| ENST00000599921 | ENSG00000105499 | PLA2G4C | 19:48551099-48614074 | Protein_coding_from_Ensembl | 3.12575 | 0.788669 | 0.0001 |
| ENST00000540069 | ENSG00000105509 | HAS1 | 19:52216364-52227247 | Protein_coding_from_Ensembl | 2.02519 | 0.426902 | 0.00255 |
| ENST00000589655 | ENSG00000105514 | RAB3D | 19:11406823-11465620 | Protein_coding_from_Ensembl | 0.536905 | 3.2985 | 0.0102 |
| ENST00000222122 | ENSG00000105516 | DBP | 19:49118583-49140695 | Protein_coding_from_Ensembl | 1.31718 | 2.64201 | 0.0062 |
| ENST00000354882 | ENSG00000105518 | TMEM205 | 19:11406823-11465620 | Protein_coding_from_Ensembl | 4.08113 | 1.14503 | 0.004 |
| ENST00000586590 | ENSG00000105518 | TMEM205 | 19:11406823-11465620 | Protein_coding_from_Ensembl | 4.67223 | 1.52527 | 0.01745 |
| ENST00000356861 | ENSG00000105576 | TNPO2 | 19:12810007-12834825 | Protein_coding_from_Ensembl | 3.52136 | 1.23361 | 5.00E-05 |
| ENST00000343550 | ENSG00000105698 | USF2 | 19:35759880-35770724 | Protein_coding_from_Ensembl | 2.38817 | 0.325817 | 0.01025 |
| ENST00000596380 | ENSG00000105698 | USF2 | 19:35759880-35770724 | Protein_coding_from_Ensembl | 4.62017 | 0.740101 | 0.0356 |
| ENST00000594844 | ENSG00000105701 | FKBP8 | 19:18642227-18654887 | Protein_coding_from_Ensembl | 5.65917 | 12.0333 | 0.0056 |
| ENST00000291503 | ENSG00000105726 | ATP13A1 | 19:19731846-19866484 | Protein_coding_from_Ensembl | 1.47605 | 3.44908 | 5.00E-05 |
| ENST00000389297 | ENSG00000105792 | C7orf63 | 7:89874487-89940377 | Protein_coding_from_Ensembl | 0.340881 | 0.997952 | 0.00265 |
| ENST00000257659 | ENSG00000105793 | GTPBP10 | 7:89964536-90839905 | Protein_coding_from_Ensembl | 2.17939 | 1.07331 | 0.0201 |
| ENST00000433727 | ENSG00000105829 | BET1 | 7:93592073-93640425 | Protein_coding_from_Ensembl | 2.95453 | 1.37553 | 0.03085 |
| ENST00000222572 | ENSG00000105854 | PON2 | 7:95025688-95064510 | Protein_coding_from_Ensembl | 8.49652 | 1.45682 | 5.00E-05 |
| ENST00000536183 | ENSG00000105854 | PON2 | 7:95025688-95064510 | Protein_coding_from_Ensembl | 1.57969 | 8.05005 | 5.00E-05 |
| ENST00000468410 | ENSG00000105856 | HBP1 | 7:106809405-107218968 | Protein_coding_from_Ensembl | 2.80654 | 1.29622 | 0.0007 |
| ENST00000222574 | ENSG00000105856 | HBP1 | 7:106809405-107218968 | Protein_coding_from_Ensembl | 1.04903 | 2.97078 | 5.00E-05 |
| ENST00000342947 | ENSG00000105928 | DFNA5 | 7:24737971-24809244 | Protein_coding_from_Ensembl | 1.00233 | 0.234987 | 0.01015 |
| ENST00000409775 | ENSG00000105928 | DFNA5 | 7:24737971-24809244 | Protein_coding_from_Ensembl | 1.06808 | 3.27846 | 0.0005 |
| ENST00000343213 | ENSG00000105971 | CAV2 | 7:115849287-116148595 | Protein_coding_from_Ensembl | 3.9499 | 1.29355 | 0.0153 |
| ENST00000456473 | ENSG00000105974 | CAV1 | 7:116164838-116201233 | Protein_coding_from_Ensembl | 24.9519 | 9.62738 | 5.00E-05 |
| ENST00000393470 | ENSG00000105974 | CAV1 | 7:116164838-116201233 | Protein_coding_from_Ensembl | 7.8396 | 19.554 | 0.0002 |
| ENST00000436117 | ENSG00000105976 | MET | 7:116312443-116438440 | Protein_coding_from_Ensembl | 0.654993 | 1.79542 | 0.0049 |
| ENST00000359574 | ENSG00000106003 | LFNG | 7:2552162-2568811 | Protein_coding_from_Ensembl | 1.45043 | 0.432468 | 0.03605 |
| ENST00000222725 | ENSG00000106003 | LFNG | 7:2552162-2568811 | Protein_coding_from_Ensembl | 1.45785 | 4.63834 | 5.00E-05 |
| ENST00000425715 | ENSG00000106049 | HIBADH | 7:27565060-27702614 | Protein_coding_from_Ensembl | 1.61341 | 5.16294 | 0.02275 |
| ENST00000543117 | ENSG00000106052 | TAX1BP1 | 7:27773013-28283536 | Protein_coding_from_Ensembl | 1.49791 | 5.23309 | 5.00E-05 |
| ENST00000439599 | ENSG00000106070 | GRB10 | 7:50657759-50861159 | Protein_coding_from_Ensembl | 3.25833 | 0.272439 | 5.00E-05 |
| ENST00000407526 | ENSG00000106070 | GRB10 | 7:50657759-50861159 | Protein_coding_from_Ensembl | 3.53495 | 1.41972 | 5.00E-05 |
| ENST00000398812 | ENSG00000106070 | GRB10 | 7:50657759-50861159 | Protein_coding_from_Ensembl | 0.0766145 | 1.45617 | 0.01155 |
| ENST00000406641 | ENSG00000106070 | GRB10 | 7:50657759-50861159 | Protein_coding_from_Ensembl | 0.647735 | 1.49865 | 0.00545 |
| ENST00000357271 | ENSG00000106070 | GRB10 | 7:50657759-50861159 | Protein_coding_from_Ensembl | 0.74438 | 1.67035 | 0.0139 |
| ENST00000265136 | ENSG00000106078 | COBL | 7:50934443-51384515 | Protein_coding_from_Ensembl | 0.210587 | 0.885412 | 0.0007 |
| ENST00000258679 | ENSG00000106086 | PLEKHA8 | 7:30067019-30170096 | Protein_coding_from_Ensembl | 0.43636 | 1.00386 | 0.0357 |
| ENST00000432317 | ENSG00000106261 | ZKSCAN1 | 7:99613203-99639312 | Protein_coding_from_Ensembl | 3.41137 | 10.8595 | 0.0025 |
| ENST00000478061 | ENSG00000106344 | RBM28 | 7:127937737-127983962 | Protein_coding_from_Ensembl | 1.76075 | 4.75383 | 0.00765 |
| ENST00000470772 | ENSG00000106348 | IMPDH1 | 7:128032330-128090500 | Protein_coding_from_Ensembl | 2.44427 | 0.351439 | 0.0035 |
| ENST00000496200 | ENSG00000106348 | IMPDH1 | 7:128032330-128090500 | Protein_coding_from_Ensembl | 1.44279 | 0.585184 | 0.0113 |
| ENST00000337619 | ENSG00000106367 | AP1S1 | 7:100797677-100804877 | Protein_coding_from_Ensembl | 5.82033 | 2.67806 | 0.00055 |
| ENST00000436587 | ENSG00000106392 | C1GALT1 | 7:7196564-7288282 | Protein_coding_from_Ensembl | 2.89774 | 1.36274 | 5.00E-05 |
| ENST00000393231 | ENSG00000106459 | NRF1 | 7:129251554-129396922 | Protein_coding_from_Ensembl | 0.402814 | 1.62887 | 0.0059 |
| ENST00000350995 | ENSG00000106462 | EZH2 | 7:148504474-148581413 | Protein_coding_from_Ensembl | 0.813335 | 0.242141 | 0.01775 |
| ENST00000453200 | ENSG00000106608 | URGCP | 7:43906156-43966010 | Protein_coding_from_Ensembl | 1.42555 | 0.690345 | 0.00205 |
| ENST00000433631 | ENSG00000106617 | PRKAG2 | 7:151253196-151576535 | Protein_coding_from_Ensembl | 0.4223 | 1.23886 | 0.0065 |
| ENST00000538333 | ENSG00000106683 | LIMK1 | 7:72440164-74366314 | Protein_coding_from_Ensembl | 0.995041 | 2.03213 | 0.04665 |
| ENST00000428286 | ENSG00000106772 | PRUNE2 | 9:79224210-79521003 | Protein_coding_from_Ensembl | 1.7848 | 0.848951 | 5.00E-05 |
| ENST00000375077 | ENSG00000106789 | CORO2A | 9:100883256-100954922 | Protein_coding_from_Ensembl | 0.922675 | 0.301156 | 0.0007 |
| ENST00000450139 | ENSG00000106819 | ASPN | 9:95059639-95432547 | Protein_coding_from_Ensembl | 15.7141 | 36.864 | 0.00035 |
| ENST00000376537 | ENSG00000106829 | TLE4 | 9:82186687-82341796 | Protein_coding_from_Ensembl | 2.52113 | 0.667547 | 5.00E-05 |
| ENST00000376534 | ENSG00000106829 | TLE4 | 9:82186687-82341796 | Protein_coding_from_Ensembl | 0.150969 | 0.883249 | 0.0128 |
| ENST00000394319 | ENSG00000106852 | LHX6 | 9:124964855-124991905 | Protein_coding_from_Ensembl | 1.20958 | 5.20932 | 5.00E-05 |
| ENST00000374075 | ENSG00000106948 | AKNA | 9:117096435-117156685 | Protein_coding_from_Ensembl | 0.278039 | 0.902903 | 0.00245 |
| ENST00000541718 | ENSG00000107186 | MPDZ | 9:13105702-13279589 | Protein_coding_from_Ensembl | 0.792571 | 2.05674 | 5.00E-05 |
| ENST00000371605 | ENSG00000107331 | ABCA2 | 9:139901685-139931234 | Protein_coding_from_Ensembl | 1.93761 | 0.895284 | 5.00E-05 |
| ENST00000377041 | ENSG00000107362 | ABHD17B | 9:74477367-74525847 | Protein_coding_from_Ensembl | 1.09988 | 2.21178 | 0.0365 |
| ENST00000396913 | ENSG00000107537 | PHYH | 10:13319795-13344412 | Protein_coding_from_Ensembl | 1.01109 | 0.270589 | 0.03925 |
| ENST00000334940 | ENSG00000107551 | RASSF4 | 10:45306471-45491339 | Protein_coding_from_Ensembl | 2.55588 | 0.709457 | 0.0008 |
| ENST00000370408 | ENSG00000107566 | ERLIN1 | 10:101909850-101989376 | Protein_coding_from_Ensembl | 0.80891 | 2.2504 | 0.02645 |
| ENST00000224652 | ENSG00000107669 | ATE1 | 10:123499938-123712303 | Protein_coding_from_Ensembl | 0.482284 | 1.22497 | 0.019 |
| ENST00000461841 | ENSG00000107736 | CDH23 | 10:73156690-73575702 | Protein_coding_from_Ensembl | 0.907676 | 1.91409 | 0.0166 |
| ENST00000425536 | ENSG00000107872 | FBXL15 | 10:104162373-104182893 | Protein_coding_from_Ensembl | 1.28574 | 3.36737 | 0.0254 |
| ENST00000436985 | ENSG00000107890 | ANKRD26 | 10:27280842-27389421 | Protein_coding_from_Ensembl | 1.69643 | 3.88769 | 5.00E-05 |
| ENST00000545048 | ENSG00000107937 | GTPBP4 | 10:1034337-1095110 | Protein_coding_from_Ensembl | 4.45797 | 1.98344 | 5.00E-05 |
| ENST00000538293 | ENSG00000107937 | GTPBP4 | 10:1034337-1095110 | Protein_coding_from_Ensembl | 1.45668 | 3.52136 | 0.0003 |
| ENST00000356792 | ENSG00000107938 | C10orf137 | 10:127371797-127452712 | Protein_coding_from_Ensembl | 0.16111 | 1.80628 | 0.0003 |
| ENST00000427662 | ENSG00000107957 | SH3PXD2A | 10:105239359-105615301 | Protein_coding_from_Ensembl | 2.15969 | 5.15295 | 0.00315 |
| ENST00000455371 | ENSG00000107959 | PITRM1 | 10:3179919-3215003 | Protein_coding_from_Ensembl | 1.85428 | 4.03711 | 0.0495 |
| ENST00000542547 | ENSG00000107968 | MAP3K8 | 10:30722865-30750762 | Protein_coding_from_Ensembl | 0.417551 | 2.44017 | 0.0068 |
| ENST00000309049 | ENSG00000108187 | PBLD | 10:70042416-70167051 | Protein_coding_from_Ensembl | 1.35108 | 0.659277 | 0.03465 |
| ENST00000490126 | ENSG00000108278 | ZNHIT3 | 17:34842470-34900681 | Protein_coding_from_Ensembl | 2.39626 | 0.381308 | 0.04295 |
| ENST00000583610 | ENSG00000108306 | FBXL20 | 17:37415383-37607539 | Protein_coding_from_Ensembl | 1.32047 | 3.13906 | 0.00215 |
| ENST00000393086 | ENSG00000108387 | 4-Sep | 17:56597197-56769416 | Protein_coding_from_Ensembl | 0.806221 | 2.88616 | 0.0014 |
| ENST00000325752 | ENSG00000108423 | TUBD1 | 17:57936850-57970304 | Protein_coding_from_Ensembl | 2.09921 | 1.02913 | 0.0036 |
| ENST00000535458 | ENSG00000108424 | KPNB1 | 17:45600307-45762871 | Protein_coding_from_Ensembl | 0.316145 | 1.56355 | 0.0021 |
| ENST00000443572 | ENSG00000108443 | RPS6KB1 | 17:57970446-58096413 | Protein_coding_from_Ensembl | 1.29779 | 0.457855 | 0.0142 |
| ENST00000583697 | ENSG00000108465 | CDK5RAP3 | 17:46018871-46073562 | Protein_coding_from_Ensembl | 2.05381 | 8.58034 | 0.0006 |
| ENST00000495350 | ENSG00000108468 | CBX1 | 17:46147413-46178883 | Protein_coding_from_Ensembl | 1.0275 | 4.78833 | 0.04535 |
| ENST00000572382 | ENSG00000108523 | RNF167 | 17:4840424-4848517 | Protein_coding_from_Ensembl | 3.44355 | 1.19626 | 0.0085 |
| ENST00000262482 | ENSG00000108523 | RNF167 | 17:4840424-4848517 | Protein_coding_from_Ensembl | 6.46284 | 3.00118 | 5.00E-05 |
| ENST00000578892 | ENSG00000108622 | ICAM2 | 17:62072977-62097994 | Protein_coding_from_Ensembl | 3.82767 | 1.58271 | 0.0089 |
| ENST00000577787 | ENSG00000108654 | DDX5 | 17:62495733-62658186 | Protein_coding_from_Ensembl | 4.75961 | 1.44947 | 0.0341 |
| ENST00000584279 | ENSG00000108654 | DDX5 | 17:62495733-62658186 | Protein_coding_from_Ensembl | 28.5466 | 13.4683 | 0.00045 |
| ENST00000589906 | ENSG00000108679 | LGALS3BP | 17:76967319-76976191 | Protein_coding_from_Ensembl | 7.88072 | 1.2145 | 0.0152 |
| ENST00000591778 | ENSG00000108679 | LGALS3BP | 17:76967319-76976191 | Protein_coding_from_Ensembl | 0.185255 | 1.81502 | 0.0194 |
| ENST00000415827 | ENSG00000108799 | EZH1 | 17:40852292-40897071 | Protein_coding_from_Ensembl | 0.529304 | 1.58806 | 5.00E-05 |
| ENST00000262018 | ENSG00000108823 | SGCA | 17:48240883-48258539 | Protein_coding_from_Ensembl | 1.22757 | 0.458137 | 0.04615 |
| ENST00000392711 | ENSG00000108946 | PRKAR1A | 17:66255322-66760023 | Protein_coding_from_Ensembl | 7.15594 | 2.69662 | 5.00E-05 |
| ENST00000575977 | ENSG00000108953 | YWHAE | 17:1247565-1303672 | Protein_coding_from_Ensembl | 4.7738 | 15.1294 | 0.00085 |
| ENST00000508293 | ENSG00000109180 | OCIAD1 | 4:48807228-48863834 | Protein_coding_from_Ensembl | 7.01235 | 2.27463 | 5.00E-05 |
| ENST00000226574 | ENSG00000109320 | NFKB1 | 4:103422485-103538459 | Protein_coding_from_Ensembl | 1.86717 | 4.4997 | 5.00E-05 |
| ENST00000504131 | ENSG00000109572 | CLCN3 | 4:170533783-170644824 | Protein_coding_from_Ensembl | 0.87003 | 0.423199 | 0.03265 |
| ENST00000511092 | ENSG00000109572 | CLCN3 | 4:170533783-170644824 | Protein_coding_from_Ensembl | 2.01222 | 5.5365 | 0.01975 |
| ENST00000360986 | ENSG00000109625 | CPZ | 4:8560325-8621488 | Protein_coding_from_Ensembl | 9.13585 | 4.04542 | 5.00E-05 |
| ENST00000603548 | ENSG00000109670 | FBXW7 | 4:153242409-153460415 | Protein_coding_from_Ensembl | 1.49753 | 3.84378 | 5.00E-05 |
| ENST00000512840 | ENSG00000109680 | TBC1D19 | 4:26578058-26756973 | Protein_coding_from_Ensembl | 2.68742 | 0.639803 | 0.02995 |
| ENST00000382888 | ENSG00000109685 | WHSC1 | 4:1873150-1983934 | Protein_coding_from_Ensembl | 1.38172 | 0.562094 | 0.00565 |
| ENST00000264428 | ENSG00000109738 | GLRB | 4:157997208-158093242 | Protein_coding_from_Ensembl | 0.364386 | 0.833905 | 0.0217 |
| ENST00000359687 | ENSG00000109790 | KLHL5 | 4:39046658-39128477 | Protein_coding_from_Ensembl | 2.78867 | 1.19802 | 0.0004 |
| ENST00000526180 | ENSG00000109846 | CRYAB | 11:111652918-111797596 | Protein_coding_from_Ensembl | 0.605102 | 1.83542 | 0.04285 |
| ENST00000451739 | ENSG00000109854 | HTATIP2 | 11:20385230-20405329 | Protein_coding_from_Ensembl | 1.23979 | 0.331985 | 0.0257 |
| ENST00000421577 | ENSG00000109854 | HTATIP2 | 11:20385230-20405329 | Protein_coding_from_Ensembl | 1.60084 | 4.11955 | 0.00995 |
| ENST00000264027 | ENSG00000109929 | SC5D | 11:121163161-121179403 | Protein_coding_from_Ensembl | 3.52669 | 1.37011 | 5.00E-05 |
| ENST00000392789 | ENSG00000109929 | SC5D | 11:121163161-121179403 | Protein_coding_from_Ensembl | 0.965881 | 3.61529 | 5.00E-05 |
| ENST00000529710 | ENSG00000110075 | PPP6R3 | 11:68228185-68384179 | Protein_coding_from_Ensembl | 1.75121 | 0.814038 | 0.0022 |
| ENST00000529344 | ENSG00000110075 | PPP6R3 | 11:68228185-68384179 | Protein_coding_from_Ensembl | 1.19915 | 3.99741 | 0.0394 |
| ENST00000534083 | ENSG00000110080 | ST3GAL4 | 11:126225534-126875953 | Protein_coding_from_Ensembl | 2.13928 | 0.539002 | 0.00255 |
| ENST00000532082 | ENSG00000110321 | EIF4G2 | 11:10804832-10830657 | Protein_coding_from_Ensembl | 5.20403 | 0.432086 | 0.01985 |
| ENST00000531416 | ENSG00000110321 | EIF4G2 | 11:10804832-10830657 | Protein_coding_from_Ensembl | 3.21673 | 8.09597 | 5.00E-05 |
| ENST00000530675 | ENSG00000110330 | BIRC2 | 11:102217941-102249401 | Protein_coding_from_Ensembl | 5.08732 | 0.606787 | 5.00E-05 |
| ENST00000456517 | ENSG00000110422 | HIPK3 | 11:33278217-33378569 | Protein_coding_from_Ensembl | 3.45172 | 1.65577 | 5.00E-05 |
| ENST00000448981 | ENSG00000110429 | FBXO3 | 11:33762484-33796089 | Protein_coding_from_Ensembl | 2.14437 | 0.666491 | 0.006 |
| ENST00000537307 | ENSG00000110446 | SLC15A3 | 11:60680637-60720002 | Protein_coding_from_Ensembl | 0.63997 | 3.23834 | 0.02345 |
| ENST00000432284 | ENSG00000110455 | ACCS | 11:44087474-44105772 | Protein_coding_from_Ensembl | 2.60828 | 0.88725 | 0.0202 |
| ENST00000528950 | ENSG00000110497 | AMBRA1 | 11:46417963-46615675 | Protein_coding_from_Ensembl | 0.932959 | 0.356101 | 0.0046 |
| ENST00000458649 | ENSG00000110497 | AMBRA1 | 11:46417963-46615675 | Protein_coding_from_Ensembl | 0.312552 | 1.18637 | 0.0002 |
| ENST00000405573 | ENSG00000110514 | MADD | 11:47290711-47351582 | Protein_coding_from_Ensembl | 1.1304 | 0.302563 | 0.026 |
| ENST00000407859 | ENSG00000110514 | MADD | 11:47290711-47351582 | Protein_coding_from_Ensembl | 2.79569 | 0.946677 | 5.00E-05 |
| ENST00000492627 | ENSG00000110651 | CD81 | 11:2349978-2418649 | Protein_coding_from_Ensembl | 26.8931 | 6.65632 | 5.00E-05 |
| ENST00000356404 | ENSG00000110697 | PITPNM1 | 11:67259238-67273734 | Protein_coding_from_Ensembl | 2.42839 | 0.449453 | 5.00E-05 |
| ENST00000436757 | ENSG00000110697 | PITPNM1 | 11:67259238-67273734 | Protein_coding_from_Ensembl | 0.724859 | 3.31869 | 5.00E-05 |
| ENST00000228140 | ENSG00000110700 | RPS13 | 11:17095935-17229530 | Protein_coding_from_Ensembl | 3.45673 | 10.0242 | 0.0137 |
| ENST00000529657 | ENSG00000110719 | TCIRG1 | 11:67806482-67888911 | Protein_coding_from_Ensembl | 2.07198 | 4.22101 | 0.03525 |
| ENST00000438420 | ENSG00000110756 | HPS5 | 11:18300222-18343745 | Protein_coding_from_Ensembl | 0.870722 | 1.77722 | 0.00045 |
| ENST00000538613 | ENSG00000110801 | PSMD9 | 12:122326636-122441833 | Protein_coding_from_Ensembl | 11.5346 | 3.39762 | 0.0011 |
| ENST00000340175 | ENSG00000110801 | PSMD9 | 12:122326636-122441833 | Protein_coding_from_Ensembl | 2.24049 | 5.03222 | 0.0225 |
| ENST00000388962 | ENSG00000110876 | SELPLG | 12:109015685-109036526 | Protein_coding_from_Ensembl | 1.57742 | 5.04618 | 5.00E-05 |
| ENST00000395805 | ENSG00000110888 | CAPRIN2 | 12:30862485-30907885 | Protein_coding_from_Ensembl | 0.957081 | 0.403546 | 0.00685 |
| ENST00000541174 | ENSG00000110911 | SLC11A2 | 12:51373183-51422349 | Protein_coding_from_Ensembl | 1.13783 | 0.538227 | 0.0273 |
| ENST00000337174 | ENSG00000110931 | CAMKK2 | 12:121570621-122241812 | Protein_coding_from_Ensembl | 1.76725 | 0.323562 | 5.00E-05 |
| ENST00000347034 | ENSG00000110931 | CAMKK2 | 12:121570621-122241812 | Protein_coding_from_Ensembl | 1.46456 | 0.541397 | 0.00075 |
| ENST00000388835 | ENSG00000111057 | KRT18 | 12:53290970-53346686 | Protein_coding_from_Ensembl | 2.79192 | 0.557491 | 0.0026 |
| ENST00000388837 | ENSG00000111057 | KRT18 | 12:53290970-53346686 | Protein_coding_from_Ensembl | 1.26126 | 4.51112 | 0.0001 |
| ENST00000314276 | ENSG00000111077 | TENC1 | 12:53399941-53458156 | Protein_coding_from_Ensembl | 0.928834 | 2.15631 | 0.0007 |
| ENST00000379902 | ENSG00000111077 | TENC1 | 12:53399941-53458156 | Protein_coding_from_Ensembl | 11.7348 | 5.57143 | 5.00E-05 |
| ENST00000549700 | ENSG00000111077 | TENC1 | 12:53399941-53458156 | Protein_coding_from_Ensembl | 2.47003 | 6.0747 | 5.00E-05 |
| ENST00000553151 | ENSG00000111142 | METAP2 | 12:95867295-95909615 | Protein_coding_from_Ensembl | 0.913217 | 3.97885 | 0.03715 |
| ENST00000228820 | ENSG00000111224 | PARP11 | 12:3900212-4067769 | Protein_coding_from_Ensembl | 0.137002 | 1.26221 | 0.0017 |
| ENST00000360579 | ENSG00000111237 | VPS29 | 12:110928901-111021125 | Protein_coding_from_Ensembl | 1.60209 | 5.79338 | 0.00055 |
| ENST00000544658 | ENSG00000111328 | CDK2AP1 | 12:123636866-123756881 | Protein_coding_from_Ensembl | 11.4831 | 0.859293 | 0.0002 |
| ENST00000552756 | ENSG00000111335 | OAS2 | 12:113344581-113455556 | Protein_coding_from_Ensembl | 0.838455 | 3.45853 | 0.01315 |
| ENST00000549336 | ENSG00000111424 | VDR | 12:48235319-48336831 | Protein_coding_from_Ensembl | 0.36919 | 0.886935 | 0.01425 |
| ENST00000392542 | ENSG00000111445 | RFC5 | 12:118451392-118500235 | Protein_coding_from_Ensembl | 0.890734 | 0.392992 | 0.03885 |
| ENST00000543826 | ENSG00000111452 | GPR133 | 12:131438451-131626014 | Protein_coding_from_Ensembl | 2.46532 | 5.95657 | 0.01015 |
| ENST00000303145 | ENSG00000111554 | MDM1 | 12:68659962-69187743 | Protein_coding_from_Ensembl | 0.404412 | 0.854835 | 0.04925 |
| ENST00000356828 | ENSG00000111647 | UHRF1BP1L | 12:100422232-100536626 | Protein_coding_from_Ensembl | 1.45873 | 0.634083 | 0.01935 |
| ENST00000543155 | ENSG00000111652 | COPS7A | 12:6832906-6841041 | Protein_coding_from_Ensembl | 2.64775 | 0.39025 | 0.00095 |
| ENST00000341550 | ENSG00000111653 | ING4 | 12:6759445-6772314 | Protein_coding_from_Ensembl | 0.523102 | 1.60822 | 0.01095 |
| ENST00000446105 | ENSG00000111653 | ING4 | 12:6759445-6772314 | Protein_coding_from_Ensembl | 0.940563 | 2.51992 | 0.0111 |
| ENST00000549872 | ENSG00000111666 | CHPT1 | 12:102089779-102137918 | Protein_coding_from_Ensembl | 0.694092 | 1.97017 | 0.0051 |
| ENST00000339789 | ENSG00000111801 | BTN3A3 | 6:26440699-26453643 | Protein_coding_from_Ensembl | 0.386247 | 0.870142 | 0.0258 |
| ENST00000487832 | ENSG00000111832 | RWDD1 | 6:116892529-116937516 | Protein_coding_from_Ensembl | 6.8379 | 3.11479 | 5.00E-05 |
| ENST00000414691 | ENSG00000111863 | ADTRP | 6:11712286-11807279 | Protein_coding_from_Ensembl | 0.952283 | 0.155718 | 0.03495 |
| ENST00000265607 | ENSG00000111880 | RNGTT | 6:89319984-89673348 | Protein_coding_from_Ensembl | 2.92616 | 1.1999 | 5.00E-05 |
| ENST00000538899 | ENSG00000111880 | RNGTT | 6:89319984-89673348 | Protein_coding_from_Ensembl | 2.89048 | 1.44437 | 0.0023 |
| ENST00000369485 | ENSG00000111880 | RNGTT | 6:89319984-89673348 | Protein_coding_from_Ensembl | 0.530167 | 1.69542 | 0.0001 |
| ENST00000368357 | ENSG00000111912 | NCOA7 | 6:126102306-126252266 | Protein_coding_from_Ensembl | 2.81104 | 0.500456 | 5.00E-05 |
| ENST00000413085 | ENSG00000111912 | NCOA7 | 6:126102306-126252266 | Protein_coding_from_Ensembl | 4.42549 | 1.86178 | 0.00195 |
| ENST00000229758 | ENSG00000112029 | FBXO5 | 6:153291663-153304714 | Protein_coding_from_Ensembl | 0.254143 | 0.937879 | 0.0177 |
| ENST00000367233 | ENSG00000112031 | MTRF1L | 6:153304741-153323820 | Protein_coding_from_Ensembl | 1.6929 | 0.838047 | 0.00195 |
| ENST00000540939 | ENSG00000112033 | PPARD | 6:35310334-35395968 | Protein_coding_from_Ensembl | 0.440981 | 2.13981 | 0.00875 |
| ENST00000379345 | ENSG00000112137 | PHACTR1 | 6:12717892-13330071 | Protein_coding_from_Ensembl | 2.3038 | 0.734922 | 0.0322 |
| ENST00000356971 | ENSG00000112144 | ICK | 6:52866076-52965671 | Protein_coding_from_Ensembl | 1.49344 | 0.234672 | 0.00015 |
| ENST00000357489 | ENSG00000112200 | ZNF451 | 6:56951641-57087112 | Protein_coding_from_Ensembl | 1.09175 | 2.99092 | 5.00E-05 |
| ENST00000541107 | ENSG00000112214 | FHL5 | 6:96806249-97142303 | Protein_coding_from_Ensembl | 1.25257 | 2.77974 | 0.00235 |
| ENST00000535432 | ENSG00000112242 | E2F3 | 6:20401053-20493941 | Protein_coding_from_Ensembl | 0.779902 | 1.69853 | 0.0006 |
| ENST00000370650 | ENSG00000112245 | PTP4A1 | 6:64231665-64293492 | Protein_coding_from_Ensembl | 0.399086 | 1.95835 | 0.00015 |
| ENST00000324723 | ENSG00000112249 | ASCC3 | 6:100956069-101329248 | Protein_coding_from_Ensembl | 2.70358 | 0.438276 | 0.03085 |
| ENST00000354577 | ENSG00000112282 | MED23 | 6:131894283-131949369 | Protein_coding_from_Ensembl | 0.644554 | 1.51793 | 0.00035 |
| ENST00000392587 | ENSG00000112290 | WASF1 | 6:110421021-110501207 | Protein_coding_from_Ensembl | 0.503447 | 1.2588 | 0.00465 |
| ENST00000355167 | ENSG00000112319 | EYA4 | 6:133561735-134216691 | Protein_coding_from_Ensembl | 0.302083 | 1.05302 | 0.00025 |
| ENST00000349379 | ENSG00000112335 | SNX3 | 6:108532425-108587289 | Protein_coding_from_Ensembl | 8.60278 | 3.62032 | 0.0008 |
| ENST00000374516 | ENSG00000112511 | PHF1 | 6:33378175-33386094 | Protein_coding_from_Ensembl | 1.86245 | 5.49532 | 5.00E-05 |
| ENST00000540480 | ENSG00000112584 | FAM120B | 6:170599790-170716153 | Protein_coding_from_Ensembl | 2.61225 | 0.905846 | 5.00E-05 |
| ENST00000230354 | ENSG00000112592 | TBP | 6:170863389-170881958 | Protein_coding_from_Ensembl | 2.30061 | 0.5476 | 0.00225 |
| ENST00000344450 | ENSG00000112679 | DUSP22 | 6:291629-354323 | Protein_coding_from_Ensembl | 2.16782 | 0.749749 | 0.0099 |
| ENST00000370050 | ENSG00000112697 | TMEM30A | 6:75962639-75994684 | Protein_coding_from_Ensembl | 0.23753 | 1.07728 | 0.0027 |
| ENST00000327284 | ENSG00000112701 | SENP6 | 6:76311224-76427997 | Protein_coding_from_Ensembl | 3.06076 | 1.40219 | 0.0001 |
| ENST00000372077 | ENSG00000112715 | VEGFA | 6:43737920-43754224 | Protein_coding_from_Ensembl | 4.92919 | 2.30078 | 5.00E-05 |
| ENST00000324450 | ENSG00000112715 | VEGFA | 6:43737920-43754224 | Protein_coding_from_Ensembl | 1.21105 | 4.72047 | 0.0047 |
| ENST00000372067 | ENSG00000112715 | VEGFA | 6:43737920-43754224 | Protein_coding_from_Ensembl | 3.13015 | 6.27518 | 5.00E-05 |
| ENST00000371708 | ENSG00000112759 | SLC29A1 | 6:44187241-44201888 | Protein_coding_from_Ensembl | 0.461833 | 1.17238 | 0.0243 |
| ENST00000508863 | ENSG00000113048 | MRPS27 | 5:71515235-71656052 | Protein_coding_from_Ensembl | 0.0939145 | 1.95045 | 0.04565 |
| ENST00000394671 | ENSG00000113119 | TMCO6 | 5:140018324-140042064 | Protein_coding_from_Ensembl | 0.52818 | 2.18044 | 0.0028 |
| ENST00000316308 | ENSG00000113240 | CLK4 | 5:178029664-178057616 | Protein_coding_from_Ensembl | 3.43855 | 1.42725 | 5.00E-05 |
| ENST00000565165 | ENSG00000113273 | ARSB | 5:78073031-78282354 | Protein_coding_from_Ensembl | 3.78906 | 1.14932 | 0.00025 |
| ENST00000393356 | ENSG00000113300 | CNOT6 | 5:179921411-180005405 | Protein_coding_from_Ensembl | 0.813961 | 0.228199 | 0.00065 |
| ENST00000504343 | ENSG00000113300 | CNOT6 | 5:179921411-180005405 | Protein_coding_from_Ensembl | 1.5883 | 3.75243 | 0.03885 |
| ENST00000522793 | ENSG00000113312 | TTC1 | 5:159436119-159546430 | Protein_coding_from_Ensembl | 1.41621 | 3.3469 | 0.0046 |
| ENST00000502553 | ENSG00000113407 | TARS | 5:33424130-33469644 | Protein_coding_from_Ensembl | 5.99068 | 2.89003 | 5.00E-05 |
| ENST00000542860 | ENSG00000113552 | GNPDA1 | 5:141371313-141392606 | Protein_coding_from_Ensembl | 1.22647 | 2.70732 | 0.0321 |
| ENST00000231509 | ENSG00000113580 | NR3C1 | 5:142657495-142815077 | Protein_coding_from_Ensembl | 2.40878 | 1.13687 | 0.0004 |
| ENST00000545279 | ENSG00000113658 | SMAD5 | 5:135465079-135524435 | Protein_coding_from_Ensembl | 4.45046 | 9.55035 | 5.00E-05 |
| ENST00000393563 | ENSG00000113758 | DBN1 | 5:176883608-176901402 | Protein_coding_from_Ensembl | 2.50989 | 0.543878 | 0.0051 |
| ENST00000463745 | ENSG00000113966 | ARL6 | 3:97483364-97540811 | Protein_coding_from_Ensembl | 0.982107 | 2.01068 | 0.03275 |
| ENST00000489213 | ENSG00000114098 | ARMC8 | 3:137906108-138048728 | Protein_coding_from_Ensembl | 1.4333 | 0.528565 | 0.0216 |
| ENST00000393058 | ENSG00000114098 | ARMC8 | 3:137906108-138048728 | Protein_coding_from_Ensembl | 2.40103 | 1.10939 | 0.0014 |
| ENST00000264982 | ENSG00000114107 | CEP70 | 3:138213185-138313380 | Protein_coding_from_Ensembl | 0.374053 | 1.87975 | 0.00025 |
| ENST00000232219 | ENSG00000114115 | RBP1 | 3:139108640-139396859 | Protein_coding_from_Ensembl | 3.24112 | 1.05856 | 0.0192 |
| ENST00000324194 | ENSG00000114120 | SLC25A36 | 3:140660671-140698775 | Protein_coding_from_Ensembl | 1.24134 | 5.37502 | 0.0003 |
| ENST00000498077 | ENSG00000114127 | XRN1 | 3:142025448-142166904 | Protein_coding_from_Ensembl | 1.47771 | 0.424502 | 5.00E-05 |
| ENST00000475915 | ENSG00000114209 | PDCD10 | 3:167401085-167452727 | Protein_coding_from_Ensembl | 10.068 | 4.96941 | 0.00065 |
| ENST00000474267 | ENSG00000114251 | WNT5A | 3:55499742-55523973 | Protein_coding_from_Ensembl | 0.396258 | 1.14637 | 0.00015 |
| ENST00000328333 | ENSG00000114270 | COL7A1 | 3:48601505-48632700 | Protein_coding_from_Ensembl | 3.11573 | 0.620312 | 5.00E-05 |
| ENST00000440628 | ENSG00000114353 | GNAI2 | 3:50263723-50296787 | Protein_coding_from_Ensembl | 1.22805 | 3.63215 | 0.00185 |
| ENST00000487505 | ENSG00000114354 | TFG | 3:100428204-100467810 | Protein_coding_from_Ensembl | 2.04059 | 0.556285 | 0.0314 |
| ENST00000418577 | ENSG00000114395 | CYB561D2 | 3:50384760-50541675 | Protein_coding_from_Ensembl | 0.506683 | 1.83319 | 0.0155 |
| ENST00000425346 | ENSG00000114395 | CYB561D2 | 3:50384760-50541675 | Protein_coding_from_Ensembl | 0.871601 | 2.48645 | 0.00955 |
| ENST00000480918 | ENSG00000114416 | FXR1 | 3:180319917-180700541 | Protein_coding_from_Ensembl | 1.10208 | 6.13182 | 5.00E-05 |
| ENST00000402543 | ENSG00000114439 | BBX | 3:107241782-107530171 | Protein_coding_from_Ensembl | 0.352682 | 0.882949 | 0.00695 |
| ENST00000449335 | ENSG00000114439 | BBX | 3:107241782-107530171 | Protein_coding_from_Ensembl | 4.12663 | 14.8113 | 0.0001 |
| ENST00000453791 | ENSG00000114626 | ABTB1 | 3:127391777-127399768 | Protein_coding_from_Ensembl | 1.13977 | 0.312046 | 0.01765 |
| ENST00000441517 | ENSG00000114650 | SCAP | 3:47455202-47518616 | Protein_coding_from_Ensembl | 0.296757 | 1.44457 | 0.001 |
| ENST00000510769 | ENSG00000114670 | NEK11 | 3:130569438-131100319 | Protein_coding_from_Ensembl | 1.08582 | 2.33397 | 0.00595 |
| ENST00000455834 | ENSG00000114735 | HEMK1 | 3:50595461-50622366 | Protein_coding_from_Ensembl | 0.21169 | 1.46045 | 0.04645 |
| ENST00000479927 | ENSG00000114745 | GORASP1 | 3:39093488-39180394 | Protein_coding_from_Ensembl | 2.65615 | 1.1953 | 0.0141 |
| ENST00000465817 | ENSG00000114790 | ARHGEF26 | 3:153742189-153977399 | Protein_coding_from_Ensembl | 0.678041 | 1.90528 | 0.0026 |
| ENST00000420323 | ENSG00000114841 | DNAH1 | 3:52350334-52434507 | Protein_coding_from_Ensembl | 2.74287 | 1.22769 | 5.00E-05 |
| ENST00000434061 | ENSG00000114867 | EIF4G1 | 3:183851806-184402546 | Protein_coding_from_Ensembl | 0.413927 | 1.48873 | 0.00075 |
| ENST00000427845 | ENSG00000114867 | EIF4G1 | 3:183851806-184402546 | Protein_coding_from_Ensembl | 3.81571 | 1.5959 | 5.00E-05 |
| ENST00000346169 | ENSG00000114867 | EIF4G1 | 3:183851806-184402546 | Protein_coding_from_Ensembl | 5.98812 | 2.21941 | 5.00E-05 |
| ENST00000535191 | ENSG00000114904 | NEK4 | 3:52744799-52804965 | Protein_coding_from_Ensembl | 0.649492 | 1.5222 | 0.00695 |
| ENST00000392222 | ENSG00000114942 | EEF1B2 | 2:206979540-207027652 | Protein_coding_from_Ensembl | 3.61026 | 7.56372 | 0.0022 |
| ENST00000305557 | ENSG00000114993 | RTKN | 2:74652962-74669549 | Protein_coding_from_Ensembl | 2.29514 | 0.589291 | 0.0001 |
| ENST00000233330 | ENSG00000114993 | RTKN | 2:74652962-74669549 | Protein_coding_from_Ensembl | 1.35188 | 3.52729 | 5.00E-05 |
| ENST00000454824 | ENSG00000115053 | NCL | 2:232318241-232348352 | Protein_coding_from_Ensembl | 2.57269 | 10.0473 | 0.0042 |
| ENST00000417652 | ENSG00000115053 | NCL | 2:232318241-232348352 | Protein_coding_from_Ensembl | 38.0869 | 14.0683 | 5.00E-05 |
| ENST00000443124 | ENSG00000115109 | EPB41L5 | 2:120770580-120974855 | Protein_coding_from_Ensembl | 0.498344 | 1.07966 | 0.0134 |
| ENST00000410057 | ENSG00000115170 | ACVR1 | 2:158592957-158732374 | Protein_coding_from_Ensembl | 1.15243 | 4.85698 | 0.0001 |
| ENST00000448666 | ENSG00000115275 | MOGS | 2:74688183-74692537 | Protein_coding_from_Ensembl | 0.262509 | 1.19771 | 0.04405 |
| ENST00000233623 | ENSG00000115282 | TTC31 | 2:74699084-74722013 | Protein_coding_from_Ensembl | 2.04033 | 0.918705 | 0.0005 |
| ENST00000233627 | ENSG00000115286 | NDUFS7 | 19:1383525-1396466 | Protein_coding_from_Ensembl | 1.62314 | 3.90724 | 0.00825 |
| ENST00000405240 | ENSG00000115310 | RTN4 | 2:55199324-55339757 | Protein_coding_from_Ensembl | 3.18403 | 0.0983008 | 0.0084 |
| ENST00000357732 | ENSG00000115310 | RTN4 | 2:55199324-55339757 | Protein_coding_from_Ensembl | 0.812369 | 1.84379 | 0.0059 |
| ENST00000409986 | ENSG00000115318 | LOXL3 | 2:74753771-74784681 | Protein_coding_from_Ensembl | 0.554155 | 1.23755 | 0.03675 |
| ENST00000393913 | ENSG00000115363 | EVA1A | 2:75696427-75796848 | Protein_coding_from_Ensembl | 1.3438 | 0.308897 | 0.01705 |
| ENST00000402135 | ENSG00000115392 | FANCL | 2:58134785-58468821 | Protein_coding_from_Ensembl | 0.23033 | 2.49835 | 0.01225 |
| ENST00000409975 | ENSG00000115446 | UNC50 | 2:99225030-99234978 | Protein_coding_from_Ensembl | 0.290404 | 1.37327 | 0.0085 |
| ENST00000409013 | ENSG00000115459 | ELMOD3 | 2:85569210-85618875 | Protein_coding_from_Ensembl | 1.63062 | 0.688902 | 0.0039 |
| ENST00000312912 | ENSG00000115548 | KDM3A | 2:86664162-86719839 | Protein_coding_from_Ensembl | 0.388332 | 1.58248 | 5.00E-05 |
| ENST00000449707 | ENSG00000115568 | ZNF142 | 2:219502638-219528166 | Protein_coding_from_Ensembl | 0.562716 | 1.68475 | 5.00E-05 |
| ENST00000445024 | ENSG00000115648 | MLPH | 2:238394070-238463961 | Protein_coding_from_Ensembl | 1.06961 | 0.178971 | 0.0339 |
| ENST00000338530 | ENSG00000115648 | MLPH | 2:238394070-238463961 | Protein_coding_from_Ensembl | 1.22244 | 0.52758 | 0.0185 |
| ENST00000409260 | ENSG00000115661 | STK16 | 2:220094478-220142892 | Protein_coding_from_Ensembl | 1.39865 | 0.419476 | 0.0295 |
| ENST00000373292 | ENSG00000115677 | HDLBP | 2:242166678-242293442 | Protein_coding_from_Ensembl | 3.06321 | 0.915634 | 0.00075 |
| ENST00000538384 | ENSG00000115761 | NOL10 | 2:10710891-10830113 | Protein_coding_from_Ensembl | 0.463706 | 2.12358 | 0.0015 |
| ENST00000234115 | ENSG00000115762 | PLEKHB2 | 2:131862419-132123658 | Protein_coding_from_Ensembl | 2.3479 | 0.230977 | 5.00E-05 |
| ENST00000406384 | ENSG00000115841 | RMDN2 | 2:38150329-38408997 | Protein_coding_from_Ensembl | 1.98181 | 0.203227 | 0.0226 |
| ENST00000446327 | ENSG00000115875 | SRSF7 | 2:38970740-38978636 | Protein_coding_from_Ensembl | 4.76317 | 1.6179 | 0.00105 |
| ENST00000375734 | ENSG00000115963 | RND3 | 2:151324708-151395525 | Protein_coding_from_Ensembl | 5.00365 | 1.80782 | 5.00E-05 |
| ENST00000330266 | ENSG00000115970 | THADA | 2:43324883-43823185 | Protein_coding_from_Ensembl | 0.640029 | 2.96887 | 5.00E-05 |
| ENST00000449347 | ENSG00000116016 | EPAS1 | 2:46520805-46613836 | Protein_coding_from_Ensembl | 1.38417 | 3.32422 | 0.0286 |
| ENST00000397062 | ENSG00000116044 | NFE2L2 | 2:178092322-178408564 | Protein_coding_from_Ensembl | 1.54306 | 0.554647 | 0.00465 |
| ENST00000586532 | ENSG00000116044 | NFE2L2 | 2:178092322-178408564 | Protein_coding_from_Ensembl | 0.420845 | 3.10794 | 0.0365 |
| ENST00000540021 | ENSG00000116062 | MSH6 | 2:47922668-48468141 | Protein_coding_from_Ensembl | 3.81393 | 1.77687 | 5.00E-05 |
| ENST00000392071 | ENSG00000116106 | EPHA4 | 2:222282746-222439174 | Protein_coding_from_Ensembl | 1.60927 | 0.44913 | 0.0006 |
| ENST00000535035 | ENSG00000116133 | DHCR24 | 1:55314137-55354946 | Protein_coding_from_Ensembl | 0.606241 | 1.77745 | 0.01095 |
| ENST00000367681 | ENSG00000116161 | CACYBP | 1:174964446-174992591 | Protein_coding_from_Ensembl | 1.31108 | 0.472792 | 0.00285 |
| ENST00000407246 | ENSG00000116171 | SCP2 | 1:53392900-53517375 | Protein_coding_from_Ensembl | 1.39801 | 0.433378 | 0.007 |
| ENST00000371341 | ENSG00000116209 | TMEM59 | 1:54497346-54519177 | Protein_coding_from_Ensembl | 3.93549 | 1.89427 | 0.0135 |
| ENST00000393688 | ENSG00000116337 | AMPD2 | 1:110158725-110318050 | Protein_coding_from_Ensembl | 1.19591 | 3.30615 | 5.00E-05 |
| ENST00000398243 | ENSG00000116497 | S100PBP | 1:33240839-33324476 | Protein_coding_from_Ensembl | 3.8429 | 0.504526 | 0.0017 |
| ENST00000367537 | ENSG00000116698 | SMG7 | 1:183430008-183567381 | Protein_coding_from_Ensembl | 1.48357 | 0.414157 | 5.00E-05 |
| ENST00000506472 | ENSG00000116704 | SLC35D1 | 1:67465014-67519782 | Protein_coding_from_Ensembl | 1.21998 | 0.5181 | 0.03815 |
| ENST00000370971 | ENSG00000116729 | WLS | 1:68167148-68698803 | Protein_coding_from_Ensembl | 10.257 | 3.34253 | 0.00095 |
| ENST00000370973 | ENSG00000116729 | WLS | 1:68167148-68698803 | Protein_coding_from_Ensembl | 3.99694 | 10.9398 | 0.00475 |
| ENST00000367441 | ENSG00000116747 | TROVE2 | 1:192981379-193060907 | Protein_coding_from_Ensembl | 3.22884 | 1.26052 | 0.0018 |
| ENST00000367446 | ENSG00000116747 | TROVE2 | 1:192981379-193060907 | Protein_coding_from_Ensembl | 3.07219 | 1.4672 | 0.0002 |
| ENST00000367454 | ENSG00000116750 | UCHL5 | 1:192981379-193060907 | Protein_coding_from_Ensembl | 1.12783 | 0.336443 | 0.0292 |
| ENST00000421683 | ENSG00000116750 | UCHL5 | 1:192981379-193060907 | Protein_coding_from_Ensembl | 0.532773 | 2.61202 | 0.03825 |
| ENST00000447664 | ENSG00000116793 | PHTF1 | 1:114239452-114302111 | Protein_coding_from_Ensembl | 2.41415 | 0.853514 | 0.00785 |
| ENST00000360529 | ENSG00000116852 | KIF21B | 1:200938519-200992828 | Protein_coding_from_Ensembl | 0.39406 | 1.56688 | 5.00E-05 |
| ENST00000530975 | ENSG00000116871 | MAP7D1 | 1:36621179-36646450 | Protein_coding_from_Ensembl | 2.87187 | 0.827952 | 0.0392 |
| ENST00000373151 | ENSG00000116871 | MAP7D1 | 1:36621179-36646450 | Protein_coding_from_Ensembl | 4.31885 | 1.36498 | 5.00E-05 |
| ENST00000369426 | ENSG00000116874 | WARS2 | 1:119573838-119870538 | Protein_coding_from_Ensembl | 1.22671 | 0.36286 | 0.00585 |
| ENST00000262861 | ENSG00000116991 | SIPA1L2 | 1:232533710-232697304 | Protein_coding_from_Ensembl | 2.25885 | 0.0116156 | 0.0317 |
| ENST00000370834 | ENSG00000117054 | ACADM | 1:76190035-76260775 | Protein_coding_from_Ensembl | 2.28495 | 1.05827 | 0.00445 |
| ENST00000541113 | ENSG00000117054 | ACADM | 1:76190035-76260775 | Protein_coding_from_Ensembl | 5.89704 | 2.04746 | 0.0001 |
| ENST00000375535 | ENSG00000117122 | MFAP2 | 1:17300996-17338423 | Protein_coding_from_Ensembl | 4.89465 | 2.25188 | 0.0018 |
| ENST00000438542 | ENSG00000117122 | MFAP2 | 1:17300996-17338423 | Protein_coding_from_Ensembl | 0.854714 | 4.2289 | 0.0035 |
| ENST00000367258 | ENSG00000117153 | KLHL12 | 1:202860227-202936408 | Protein_coding_from_Ensembl | 2.97915 | 0.818851 | 0.01275 |
| ENST00000435533 | ENSG00000117153 | KLHL12 | 1:202860227-202936408 | Protein_coding_from_Ensembl | 0.162762 | 1.38791 | 0.02415 |
| ENST00000414729 | ENSG00000117280 | RAB7L1 | 1:205737113-205744588 | Protein_coding_from_Ensembl | 0.850938 | 2.42129 | 0.01555 |
| ENST00000264205 | ENSG00000117298 | ECE1 | 1:21543739-21671997 | Protein_coding_from_Ensembl | 2.96475 | 0.882929 | 0.00015 |
| ENST00000436439 | ENSG00000117305 | HMGCL | 1:24128374-24165110 | Protein_coding_from_Ensembl | 0.766131 | 3.10475 | 0.0024 |
| ENST00000309519 | ENSG00000117411 | B4GALT2 | 1:44444614-44456840 | Protein_coding_from_Ensembl | 7.68797 | 3.7072 | 0.00075 |
| ENST00000415017 | ENSG00000117519 | CNN3 | 1:95362506-95392834 | Protein_coding_from_Ensembl | 0.531829 | 13.8819 | 0.02035 |
| ENST00000392078 | ENSG00000117523 | PRRC2C | 1:171454650-171562650 | Protein_coding_from_Ensembl | 0.506624 | 3.57688 | 5.00E-05 |
| ENST00000338920 | ENSG00000117523 | PRRC2C | 1:171454650-171562650 | Protein_coding_from_Ensembl | 0.0547522 | 5.50215 | 0.00155 |
| ENST00000370207 | ENSG00000117525 | F3 | 1:94994780-95007356 | Protein_coding_from_Ensembl | 0.509027 | 3.80979 | 0.00045 |
| ENST00000370197 | ENSG00000117569 | PTBP2 | 1:97187220-97289294 | Protein_coding_from_Ensembl | 0.220428 | 1.12992 | 0.00365 |
| ENST00000367718 | ENSG00000117586 | TNFSF4 | 1:173152872-173176452 | Protein_coding_from_Ensembl | 0.801017 | 0.121495 | 0.00755 |
| ENST00000281834 | ENSG00000117586 | TNFSF4 | 1:173152872-173176452 | Protein_coding_from_Ensembl | 0.535657 | 1.29888 | 0.0031 |
| ENST00000530003 | ENSG00000117676 | RPS6KA1 | 1:26856251-26901521 | Protein_coding_from_Ensembl | 1.00691 | 2.26708 | 0.00085 |
| ENST00000430799 | ENSG00000117713 | ARID1A | 1:27022523-27108595 | Protein_coding_from_Ensembl | 4.47632 | 1.42428 | 5.00E-05 |
| ENST00000457599 | ENSG00000117713 | ARID1A | 1:27022523-27108595 | Protein_coding_from_Ensembl | 1.20781 | 2.5433 | 5.00E-05 |
| ENST00000359316 | ENSG00000117791 | 2-Mar | 1:220921566-220958150 | Protein_coding_from_Ensembl | 0.754525 | 1.61941 | 0.0446 |
| ENST00000434713 | ENSG00000118007 | STAG1 | 3:135969147-136471220 | Protein_coding_from_Ensembl | 0.842648 | 0.198316 | 0.0021 |
| ENST00000536929 | ENSG00000118007 | STAG1 | 3:135969147-136471220 | Protein_coding_from_Ensembl | 0.688223 | 2.73121 | 5.00E-05 |
| ENST00000432329 | ENSG00000118260 | CREB1 | 2:208038357-208490652 | Protein_coding_from_Ensembl | 2.00383 | 4.86962 | 5.00E-05 |
| ENST00000448277 | ENSG00000118260 | CREB1 | 2:208038357-208490652 | Protein_coding_from_Ensembl | 2.32927 | 5.71446 | 0.0093 |
| ENST00000369102 | ENSG00000118292 | C1orf54 | 1:150237798-150253327 | Protein_coding_from_Ensembl | 2.30215 | 0.972986 | 0.02025 |
| ENST00000262346 | ENSG00000118454 | ANKRD13C | 1:70726270-70820417 | Protein_coding_from_Ensembl | 2.48719 | 0.482801 | 5.00E-05 |
| ENST00000515594 | ENSG00000118482 | PHF3 | 6:64345724-66417118 | Protein_coding_from_Ensembl | 1.0544 | 0.51398 | 0.02645 |
| ENST00000367858 | ENSG00000118515 | SGK1 | 6:134490383-134639250 | Protein_coding_from_Ensembl | 1.09264 | 0.515932 | 0.0129 |
| ENST00000608991 | ENSG00000118518 | RNF146 | 6:127587754-127609712 | Protein_coding_from_Ensembl | 0.494192 | 3.59366 | 0.0001 |
| ENST00000581193 | ENSG00000118680 | MYL12B | 18:3261906-3278282 | Protein_coding_from_Ensembl | 2.11899 | 0.35374 | 0.0261 |
| ENST00000400175 | ENSG00000118680 | MYL12B | 18:3261906-3278282 | Protein_coding_from_Ensembl | 28.4349 | 13.1001 | 5.00E-05 |
| ENST00000406360 | ENSG00000118689 | FOXO3 | 6:108881037-109005977 | Protein_coding_from_Ensembl | 4.79929 | 1.75333 | 5.00E-05 |
| ENST00000515655 | ENSG00000118777 | ABCG2 | 4:89011415-89152474 | Protein_coding_from_Ensembl | 0.465931 | 1.16988 | 0.00175 |
| ENST00000515468 | ENSG00000118816 | CCNI | 4:77968310-77999849 | Protein_coding_from_Ensembl | 6.65647 | 13.4251 | 0.0053 |
| ENST00000415822 | ENSG00000118855 | MFSD1 | 3:158414680-158547508 | Protein_coding_from_Ensembl | 0.172572 | 2.1823 | 0.01135 |
| ENST00000432947 | ENSG00000118961 | C2orf43 | 2:20883773-21022890 | Protein_coding_from_Ensembl | 5.05798 | 1.23841 | 0.02985 |
| ENST00000409364 | ENSG00000119041 | GTF3C3 | 2:197504277-197664449 | Protein_coding_from_Ensembl | 2.66683 | 0.639305 | 0.00215 |
| ENST00000492079 | ENSG00000119185 | ITGB1BP1 | 2:9346893-9563676 | Protein_coding_from_Ensembl | 4.51316 | 1.80695 | 0.0215 |
| ENST00000355346 | ENSG00000119185 | ITGB1BP1 | 2:9346893-9563676 | Protein_coding_from_Ensembl | 1.28478 | 2.71823 | 0.00365 |
| ENST00000470540 | ENSG00000119280 | C1orf198 | 1:230972864-231005335 | Protein_coding_from_Ensembl | 1.93116 | 0.416575 | 5.00E-05 |
| ENST00000522201 | ENSG00000119280 | C1orf198 | 1:230972864-231005335 | Protein_coding_from_Ensembl | 4.21026 | 1.91086 | 0.03915 |
| ENST00000343327 | ENSG00000119314 | PTBP3 | 9:114980714-115095947 | Protein_coding_from_Ensembl | 1.85493 | 0.715224 | 0.0025 |
| ENST00000419582 | ENSG00000119383 | PPP2R4 | 9:131857088-131911225 | Protein_coding_from_Ensembl | 0.550497 | 1.71766 | 0.04875 |
| ENST00000451303 | ENSG00000119396 | RAB14 | 9:123940414-124095121 | Protein_coding_from_Ensembl | 1.16779 | 7.45505 | 0.03065 |
| ENST00000419155 | ENSG00000119403 | PHF19 | 9:123617928-123639606 | Protein_coding_from_Ensembl | 1.4225 | 0.472722 | 0.0181 |
| ENST00000423785 | ENSG00000119408 | NEK6 | 9:127019884-127115586 | Protein_coding_from_Ensembl | 5.4723 | 0.933764 | 0.0147 |
| ENST00000373498 | ENSG00000119487 | MAPKAP1 | 9:128199671-128469513 | Protein_coding_from_Ensembl | 5.62432 | 1.25575 | 5.00E-05 |
| ENST00000265960 | ENSG00000119487 | MAPKAP1 | 9:128199671-128469513 | Protein_coding_from_Ensembl | 2.5889 | 7.9588 | 5.00E-05 |
| ENST00000541287 | ENSG00000119509 | INVS | 9:102861501-103115221 | Protein_coding_from_Ensembl | 0.426259 | 0.995893 | 0.0098 |
| ENST00000361632 | ENSG00000119535 | CSF3R | 1:36931643-36948879 | Protein_coding_from_Ensembl | 2.11148 | 0.383523 | 5.00E-05 |
| ENST00000418048 | ENSG00000119535 | CSF3R | 1:36931643-36948879 | Protein_coding_from_Ensembl | 0.355263 | 2.17649 | 0.0007 |
| ENST00000555567 | ENSG00000119630 | PGF | 14:75408536-75422487 | Protein_coding_from_Ensembl | 3.8722 | 1.53513 | 0.0002 |
| ENST00000238607 | ENSG00000119630 | PGF | 14:75408536-75422487 | Protein_coding_from_Ensembl | 0.443435 | 3.17937 | 0.0024 |
| ENST00000238633 | ENSG00000119655 | NPC2 | 14:74942894-74963809 | Protein_coding_from_Ensembl | 5.69953 | 14.6386 | 5.00E-05 |
| ENST00000556257 | ENSG00000119684 | MLH3 | 14:75480466-75518235 | Protein_coding_from_Ensembl | 4.26959 | 1.21327 | 5.00E-05 |
| ENST00000238662 | ENSG00000119684 | MLH3 | 14:75480466-75518235 | Protein_coding_from_Ensembl | 0.275357 | 1.54782 | 5.00E-05 |
| ENST00000531500 | ENSG00000119707 | RBM25 | 14:73523701-73588122 | Protein_coding_from_Ensembl | 0.351502 | 2.17626 | 0.033 |
| ENST00000555126 | ENSG00000119711 | ALDH6A1 | 14:74318546-74551196 | Protein_coding_from_Ensembl | 4.58759 | 1.73729 | 0.0009 |
| ENST00000350259 | ENSG00000119711 | ALDH6A1 | 14:74318546-74551196 | Protein_coding_from_Ensembl | 0.335916 | 1.83678 | 0.00795 |
| ENST00000238699 | ENSG00000119714 | GPR68 | 14:91698875-91720269 | Protein_coding_from_Ensembl | 0.220479 | 1.36492 | 0.00365 |
| ENST00000425720 | ENSG00000119777 | TMEM214 | 2:27255777-27264563 | Protein_coding_from_Ensembl | 0.42522 | 2.40256 | 0.0347 |
| ENST00000419554 | ENSG00000119787 | ATL2 | 2:38522021-38604432 | Protein_coding_from_Ensembl | 2.1471 | 0.320732 | 0.0027 |
| ENST00000406122 | ENSG00000119787 | ATL2 | 2:38522021-38604432 | Protein_coding_from_Ensembl | 0.0950765 | 1.11277 | 0.0277 |
| ENST00000441530 | ENSG00000119812 | FAM98A | 2:33808724-33824449 | Protein_coding_from_Ensembl | 0.647685 | 1.64957 | 0.02015 |
| ENST00000436178 | ENSG00000119912 | IDE | 10:94211440-94333833 | Protein_coding_from_Ensembl | 3.80297 | 1.34192 | 0.01655 |
| ENST00000393134 | ENSG00000119950 | MXI1 | 10:111967362-112047123 | Protein_coding_from_Ensembl | 5.32919 | 2.4693 | 0.00835 |
| ENST00000262419 | ENSG00000120071 | KANSL1 | 17:44107281-44302733 | Protein_coding_from_Ensembl | 0.782302 | 1.90603 | 5.00E-05 |
| ENST00000432791 | ENSG00000120071 | KANSL1 | 17:44107281-44302733 | Protein_coding_from_Ensembl | 0.116947 | 2.45231 | 0.00175 |
| ENST00000572904 | ENSG00000120071 | KANSL1 | 17:44107281-44302733 | Protein_coding_from_Ensembl | 10.4281 | 4.81523 | 5.00E-05 |
| ENST00000460354 | ENSG00000120253 | NUP43 | 6:150045450-150132556 | Protein_coding_from_Ensembl | 1.61695 | 0.126338 | 0.02615 |
| ENST00000508305 | ENSG00000120318 | ARAP3 | 5:141032967-141061788 | Protein_coding_from_Ensembl | 0.402385 | 1.21028 | 0.0002 |
| ENST00000367763 | ENSG00000120370 | GORAB | 1:170429593-170522974 | Protein_coding_from_Ensembl | 2.84156 | 1.06009 | 0.0004 |
| ENST00000420894 | ENSG00000120438 | TCP1 | 6:160090088-160210781 | Protein_coding_from_Ensembl | 5.10873 | 2.37353 | 0.0019 |
| ENST00000539756 | ENSG00000120438 | TCP1 | 6:160090088-160210781 | Protein_coding_from_Ensembl | 1.81901 | 4.58576 | 0.0382 |
| ENST00000533214 | ENSG00000120451 | SNX19 | 11:130745330-130786404 | Protein_coding_from_Ensembl | 1.40967 | 3.41978 | 5.00E-05 |
| ENST00000533599 | ENSG00000120457 | KCNJ5 | 11:128761250-128791058 | Protein_coding_from_Ensembl | 1.25296 | 0.220966 | 0.0471 |
| ENST00000540180 | ENSG00000120647 | CCDC77 | 12:389294-551811 | Protein_coding_from_Ensembl | 1.64472 | 0.816619 | 0.047 |
| ENST00000422000 | ENSG00000120647 | CCDC77 | 12:389294-551811 | Protein_coding_from_Ensembl | 0.278752 | 1.08659 | 0.02095 |
| ENST00000398795 | ENSG00000120659 | TNFSF11 | 13:43136871-43182149 | Protein_coding_from_Ensembl | 0.179951 | 7.62757 | 0.01475 |
| ENST00000452359 | ENSG00000120662 | MTRF1 | 13:41506055-41837742 | Protein_coding_from_Ensembl | 0.94895 | 2.83953 | 0.03955 |
| ENST00000399275 | ENSG00000120693 | SMAD9 | 13:37417669-37494902 | Protein_coding_from_Ensembl | 4.34382 | 0.928396 | 5.00E-05 |
| ENST00000508639 | ENSG00000120725 | SIL1 | 5:138282408-138667360 | Protein_coding_from_Ensembl | 5.88772 | 2.62283 | 0.04035 |
| ENST00000517536 | ENSG00000120915 | EPHX2 | 8:27348295-27403081 | Protein_coding_from_Ensembl | 0.568838 | 2.22991 | 0.00505 |
| ENST00000534961 | ENSG00000120925 | RNF170 | 8:42704779-42940932 | Protein_coding_from_Ensembl | 0.223262 | 0.993088 | 0.00435 |
| ENST00000539273 | ENSG00000121057 | AKAP1 | 17:55162452-55198710 | Protein_coding_from_Ensembl | 0.774102 | 2.26419 | 0.0001 |
| ENST00000393331 | ENSG00000121067 | SPOP | 17:47676245-47755596 | Protein_coding_from_Ensembl | 1.331 | 2.84614 | 0.0001 |
| ENST00000415270 | ENSG00000121073 | SLC35B1 | 17:47778304-47906458 | Protein_coding_from_Ensembl | 0.928163 | 2.44322 | 0.0074 |
| ENST00000278302 | ENSG00000121236 | TRIM6 | 11:5274419-5959849 | Protein_coding_from_Ensembl | 1.05173 | 0.402357 | 0.01195 |
| ENST00000590597 | ENSG00000121289 | CEP89 | 19:33369901-33462897 | Protein_coding_from_Ensembl | 0.5932 | 1.56128 | 0.04525 |
| ENST00000371522 | ENSG00000121310 | ECHDC2 | 1:53361655-53392884 | Protein_coding_from_Ensembl | 1.43062 | 0.46423 | 0.02445 |
| ENST00000545178 | ENSG00000121350 | PYROXD1 | 12:21590548-21654603 | Protein_coding_from_Ensembl | 1.04862 | 0.0904352 | 0.00665 |
| ENST00000240719 | ENSG00000121406 | ZNF549 | 19:58038428-58071231 | Protein_coding_from_Ensembl | 0.975218 | 2.54021 | 5.00E-05 |
| ENST00000600404 | ENSG00000121413 | ZSCAN18 | 19:58570606-58629794 | Protein_coding_from_Ensembl | 1.61761 | 0.28254 | 0.00965 |
| ENST00000299871 | ENSG00000121417 | ZNF211 | 19:58141760-58154147 | Protein_coding_from_Ensembl | 1.24212 | 0.562982 | 0.0141 |
| ENST00000466780 | ENSG00000121440 | PDZRN3 | 3:72639369-73677154 | Protein_coding_from_Ensembl | 0.963119 | 1.97458 | 0.00775 |
| ENST00000481965 | ENSG00000121542 | SEC22A | 3:122785908-122992977 | Protein_coding_from_Ensembl | 3.90116 | 1.11302 | 0.0293 |
| ENST00000393765 | ENSG00000121578 | B4GALT4 | 3:118930578-119009513 | Protein_coding_from_Ensembl | 1.87965 | 0.850263 | 0.00455 |
| ENST00000471675 | ENSG00000121578 | B4GALT4 | 3:118930578-119009513 | Protein_coding_from_Ensembl | 3.72259 | 1.18108 | 0.0303 |
| ENST00000491063 | ENSG00000121749 | TBC1D15 | 12:72233486-72320629 | Protein_coding_from_Ensembl | 3.78291 | 0.941295 | 0.0017 |
| ENST00000393309 | ENSG00000121749 | TBC1D15 | 12:72233486-72320629 | Protein_coding_from_Ensembl | 7.95818 | 1.75299 | 5.00E-05 |
| ENST00000496856 | ENSG00000121864 | ZNF639 | 3:179040778-179053323 | Protein_coding_from_Ensembl | 0.501071 | 1.99626 | 0.0044 |
| ENST00000369970 | ENSG00000121940 | CLCC1 | 1:109358519-109506111 | Protein_coding_from_Ensembl | 2.18321 | 1.00121 | 0.00685 |
| ENST00000441735 | ENSG00000121957 | GPSM2 | 1:109358519-109506111 | Protein_coding_from_Ensembl | 6.96213 | 1.74531 | 0.00355 |
| ENST00000344850 | ENSG00000121964 | GTDC1 | 2:144694639-145090135 | Protein_coding_from_Ensembl | 2.6298 | 0.398922 | 5.00E-05 |
| ENST00000437114 | ENSG00000121964 | GTDC1 | 2:144694639-145090135 | Protein_coding_from_Ensembl | 2.54293 | 0.47331 | 0.04455 |
| ENST00000264159 | ENSG00000121988 | ZRANB3 | 2:135809834-136288806 | Protein_coding_from_Ensembl | 0.461218 | 1.09765 | 0.00345 |
| ENST00000508526 | ENSG00000122008 | POLK | 5:74664310-74896969 | Protein_coding_from_Ensembl | 1.28384 | 0.289533 | 0.0174 |
| ENST00000405591 | ENSG00000122033 | MTIF3 | 13:27998680-28024739 | Protein_coding_from_Ensembl | 2.34779 | 1.09426 | 0.045 |
| ENST00000428395 | ENSG00000122068 | FYTTD1 | 3:197398263-197514467 | Protein_coding_from_Ensembl | 2.96147 | 6.64173 | 5.00E-05 |
| ENST00000393725 | ENSG00000122203 | KIAA1191 | 5:175773063-175788971 | Protein_coding_from_Ensembl | 6.15385 | 3.01358 | 5.00E-05 |
| ENST00000348022 | ENSG00000122257 | RBBP6 | 16:24549013-24584184 | Protein_coding_from_Ensembl | 0.291205 | 1.69551 | 5.00E-05 |
| ENST00000298784 | ENSG00000122376 | FAM35A | 10:88695296-88951225 | Protein_coding_from_Ensembl | 1.64774 | 4.47048 | 5.00E-05 |
| ENST00000372181 | ENSG00000122378 | FAM213A | 10:82167584-82196869 | Protein_coding_from_Ensembl | 1.39949 | 0.490774 | 0.0137 |
| ENST00000394731 | ENSG00000122417 | ODF2L | 1:86814343-86862023 | Protein_coding_from_Ensembl | 0.300358 | 1.52985 | 0.0063 |
| ENST00000322231 | ENSG00000122550 | KLHL7 | 7:22980877-23510086 | Protein_coding_from_Ensembl | 0.473807 | 1.35757 | 0.00735 |
| ENST00000542558 | ENSG00000122550 | KLHL7 | 7:22980877-23510086 | Protein_coding_from_Ensembl | 0.586998 | 2.24691 | 0.00555 |
| ENST00000404894 | ENSG00000122644 | ARL4A | 7:12726480-12730559 | Protein_coding_from_Ensembl | 3.20787 | 1.18073 | 0.03105 |
| ENST00000430372 | ENSG00000122783 | C7orf49 | 7:134671258-134855547 | Protein_coding_from_Ensembl | 1.09089 | 0.345374 | 0.03505 |
| ENST00000430082 | ENSG00000122882 | ECD | 10:74870216-75118617 | Protein_coding_from_Ensembl | 0.122473 | 0.82285 | 0.04765 |
| ENST00000263556 | ENSG00000122884 | P4HA1 | 10:74766974-74856732 | Protein_coding_from_Ensembl | 0.281446 | 1.96403 | 0.0008 |
| ENST00000242591 | ENSG00000122970 | IFT81 | 12:110562139-110656602 | Protein_coding_from_Ensembl | 1.52933 | 0.690689 | 0.00455 |
| ENST00000422622 | ENSG00000123096 | SSPN | 12:26272958-26986131 | Protein_coding_from_Ensembl | 3.60297 | 1.07967 | 5.00E-05 |
| ENST00000306172 | ENSG00000123106 | CCDC91 | 12:28286181-28734479 | Protein_coding_from_Ensembl | 2.66315 | 0.299559 | 0.00195 |
| ENST00000336430 | ENSG00000123130 | ACOT9 | X:23720369-23784592 | Protein_coding_from_Ensembl | 2.61246 | 0.999991 | 0.00275 |
| ENST00000242786 | ENSG00000123146 | CD97 | 19:14491312-14519537 | Protein_coding_from_Ensembl | 1.25018 | 3.26956 | 5.00E-05 |
| ENST00000242796 | ENSG00000123154 | WDR83 | 19:12754020-12792716 | Protein_coding_from_Ensembl | 2.22427 | 0.97998 | 0.0338 |
| ENST00000589631 | ENSG00000123159 | GIPC1 | 19:14588571-14606944 | Protein_coding_from_Ensembl | 0.648577 | 2.97142 | 0.0175 |
| ENST00000393033 | ENSG00000123159 | GIPC1 | 19:14588571-14606944 | Protein_coding_from_Ensembl | 2.55105 | 5.46674 | 5.00E-05 |
| ENST00000242827 | ENSG00000123179 | EBPL | 13:50234811-50265623 | Protein_coding_from_Ensembl | 8.8726 | 4.37381 | 0.0012 |
| ENST00000242839 | ENSG00000123191 | ATP7B | 13:52506090-52585630 | Protein_coding_from_Ensembl | 0.426046 | 1.53523 | 5.00E-05 |
| ENST00000511299 | ENSG00000123213 | NLN | 5:64885506-65167553 | Protein_coding_from_Ensembl | 1.02778 | 0.24831 | 0.03785 |
| ENST00000430041 | ENSG00000123329 | ARHGAP9 | 12:57853917-57914300 | Protein_coding_from_Ensembl | 2.42171 | 0.880201 | 0.0008 |
| ENST00000337581 | ENSG00000123415 | SMUG1 | 12:54555848-54582778 | Protein_coding_from_Ensembl | 0.97814 | 2.83836 | 0.00245 |
| ENST00000550367 | ENSG00000123416 | TUBA1B | 12:49521564-49541652 | Protein_coding_from_Ensembl | 2.82946 | 0.475045 | 0.0478 |
| ENST00000526821 | ENSG00000123472 | ATPAF1 | 1:47098408-47184824 | Protein_coding_from_Ensembl | 0.490529 | 2.77768 | 0.0114 |
| ENST00000451850 | ENSG00000123505 | AMD1 | 6:111195972-111216916 | Protein_coding_from_Ensembl | 1.83522 | 0.742647 | 0.04155 |
| ENST00000536175 | ENSG00000123607 | TTC21B | 2:166713984-166810353 | Protein_coding_from_Ensembl | 1.18092 | 0.363629 | 0.0376 |
| ENST00000343439 | ENSG00000123636 | BAZ2B | 2:160175489-160473593 | Protein_coding_from_Ensembl | 0.839708 | 2.6121 | 5.00E-05 |
| ENST00000366996 | ENSG00000123684 | LPGAT1 | 1:211916798-212034553 | Protein_coding_from_Ensembl | 0.45339 | 1.83594 | 0.00365 |
| ENST00000324464 | ENSG00000123815 | ADCK4 | 19:41197433-41271294 | Protein_coding_from_Ensembl | 1.60796 | 0.191462 | 0.007 |
| ENST00000243662 | ENSG00000123892 | RAB38 | 11:87831758-87908635 | Protein_coding_from_Ensembl | 1.06739 | 2.62199 | 0.01005 |
| ENST00000519980 | ENSG00000123908 | AGO2 | 8:141541263-141645718 | Protein_coding_from_Ensembl | 2.90442 | 1.0897 | 5.00E-05 |
| ENST00000421680 | ENSG00000123983 | ACSL3 | 2:223725651-223809357 | Protein_coding_from_Ensembl | 1.67167 | 6.44166 | 0.0061 |
| ENST00000535926 | ENSG00000123989 | CHPF | 2:220403668-220415317 | Protein_coding_from_Ensembl | 1.92597 | 0.66355 | 0.00405 |
| ENST00000373972 | ENSG00000123992 | DNPEP | 2:220238267-220291461 | Protein_coding_from_Ensembl | 3.01487 | 0.244087 | 0.009 |
| ENST00000372689 | ENSG00000124155 | PIGT | 20:44044706-44054885 | Protein_coding_from_Ensembl | 1.90797 | 0.142652 | 0.02345 |
| ENST00000279035 | ENSG00000124155 | PIGT | 20:44044706-44054885 | Protein_coding_from_Ensembl | 0.708676 | 2.51478 | 0.0021 |
| ENST00000342716 | ENSG00000124159 | MATN4 | 20:43922084-43945803 | Protein_coding_from_Ensembl | 0.35591 | 2.81867 | 0.00055 |
| ENST00000371828 | ENSG00000124214 | STAU1 | 20:47729877-47804904 | Protein_coding_from_Ensembl | 1.33469 | 3.93292 | 5.00E-05 |
| ENST00000244227 | ENSG00000124380 | SNRNP27 | 2:70120691-70170077 | Protein_coding_from_Ensembl | 1.24559 | 0.310146 | 0.01685 |
| ENST00000381668 | ENSG00000124406 | ATP8A1 | 4:42410389-42659122 | Protein_coding_from_Ensembl | 1.18957 | 0.509538 | 5.00E-05 |
| ENST00000372917 | ENSG00000124496 | TRERF1 | 6:42192668-42419789 | Protein_coding_from_Ensembl | 0.474106 | 0.990168 | 0.00085 |
| ENST00000380771 | ENSG00000124535 | WRNIP1 | 6:2661006-2822143 | Protein_coding_from_Ensembl | 0.978403 | 0.296461 | 0.01125 |
| ENST00000380546 | ENSG00000124570 | SERPINB6 | 6:2917127-2972090 | Protein_coding_from_Ensembl | 3.6488 | 1.68132 | 0.0043 |
| ENST00000380454 | ENSG00000124588 | NQO2 | 6:2985531-3025005 | Protein_coding_from_Ensembl | 5.30596 | 2.27463 | 0.00665 |
| ENST00000340692 | ENSG00000124615 | MOCS1 | 6:39760141-39902290 | Protein_coding_from_Ensembl | 0.775743 | 2.25375 | 0.00105 |
| ENST00000373175 | ENSG00000124615 | MOCS1 | 6:39760141-39902290 | Protein_coding_from_Ensembl | 1.93281 | 4.21987 | 5.00E-05 |
| ENST00000409312 | ENSG00000124641 | MED20 | 6:41873091-41888877 | Protein_coding_from_Ensembl | 0.57549 | 1.79066 | 0.0497 |
| ENST00000349384 | ENSG00000124782 | RREB1 | 6:7107829-7252213 | Protein_coding_from_Ensembl | 1.07008 | 0.346805 | 5.00E-05 |
| ENST00000471433 | ENSG00000124782 | RREB1 | 6:7107829-7252213 | Protein_coding_from_Ensembl | 2.94965 | 1.28835 | 0.03165 |
| ENST00000489567 | ENSG00000124783 | SSR1 | 6:7268538-7418270 | Protein_coding_from_Ensembl | 1.6146 | 5.10862 | 5.00E-05 |
| ENST00000244769 | ENSG00000124788 | ATXN1 | 6:16299342-16767114 | Protein_coding_from_Ensembl | 2.07424 | 4.60531 | 5.00E-05 |
| ENST00000541979 | ENSG00000124813 | RUNX2 | 6:44777053-45634483 | Protein_coding_from_Ensembl | 7.08036 | 3.41467 | 5.00E-05 |
| ENST00000359524 | ENSG00000124813 | RUNX2 | 6:44777053-45634483 | Protein_coding_from_Ensembl | 1.19386 | 5.40156 | 5.00E-05 |
| ENST00000539824 | ENSG00000125089 | SH3TC1 | 4:8183798-8243530 | Protein_coding_from_Ensembl | 0.547688 | 2.03275 | 5.00E-05 |
| ENST00000382521 | ENSG00000125089 | SH3TC1 | 4:8183798-8243530 | Protein_coding_from_Ensembl | 1.38208 | 3.28169 | 0.03015 |
| ENST00000441024 | ENSG00000125107 | CNOT1 | 16:58496749-58663790 | Protein_coding_from_Ensembl | 3.24737 | 1.21019 | 5.00E-05 |
| ENST00000409037 | ENSG00000125122 | LRRC29 | 16:67241041-67260951 | Protein_coding_from_Ensembl | 1.23922 | 0.385897 | 0.02215 |
| ENST00000568104 | ENSG00000125124 | BBS2 | 16:56463044-56554195 | Protein_coding_from_Ensembl | 0.918531 | 0.269471 | 0.01955 |
| ENST00000340807 | ENSG00000125245 | GPR18 | 13:99853027-100038753 | Protein_coding_from_Ensembl | 3.47014 | 1.0451 | 0.00055 |
| ENST00000376234 | ENSG00000125247 | TMTC4 | 13:101256180-101327347 | Protein_coding_from_Ensembl | 0.567406 | 1.22447 | 0.00675 |
| ENST00000538287 | ENSG00000125257 | ABCC4 | 13:95672082-95953687 | Protein_coding_from_Ensembl | 0.808842 | 0.281886 | 0.04245 |
| ENST00000559501 | ENSG00000125378 | BMP4 | 14:54416453-54425479 | Protein_coding_from_Ensembl | 1.08398 | 2.39359 | 0.03795 |
| ENST00000398051 | ENSG00000125388 | GRK4 | 4:2965334-3042474 | Protein_coding_from_Ensembl | 0.508796 | 1.06461 | 0.0494 |
| ENST00000245541 | ENSG00000125447 | GGA3 | 17:73232693-73267308 | Protein_coding_from_Ensembl | 0.961455 | 0.369158 | 0.0045 |
| ENST00000537686 | ENSG00000125447 | GGA3 | 17:73232693-73267308 | Protein_coding_from_Ensembl | 1.41529 | 3.13624 | 0.02315 |
| ENST00000582160 | ENSG00000125458 | NT5C | 17:73106046-73129138 | Protein_coding_from_Ensembl | 4.86149 | 2.0628 | 0.0089 |
| ENST00000537335 | ENSG00000125630 | POLR1B | 2:113299491-113334635 | Protein_coding_from_Ensembl | 0.869856 | 0.341373 | 0.01865 |
| ENST00000371118 | ENSG00000125703 | ATG4C | 1:63238755-63331184 | Protein_coding_from_Ensembl | 3.2968 | 0.774584 | 0.04995 |
| ENST00000596758 | ENSG00000125733 | TRIP10 | 19:6737935-6751537 | Protein_coding_from_Ensembl | 0.554631 | 1.44401 | 0.01505 |
| ENST00000443841 | ENSG00000125740 | FOSB | 19:45882891-45982086 | Protein_coding_from_Ensembl | 0.838561 | 3.1851 | 5.00E-05 |
| ENST00000591858 | ENSG00000125740 | FOSB | 19:45882891-45982086 | Protein_coding_from_Ensembl | 9.79438 | 3.71347 | 5.00E-05 |
| ENST00000316562 | ENSG00000125779 | PANK2 | 20:3867414-3907605 | Protein_coding_from_Ensembl | 2.00832 | 0.87888 | 0.0049 |
| ENST00000338121 | ENSG00000125812 | GZF1 | 20:23342786-23353700 | Protein_coding_from_Ensembl | 1.63581 | 3.80848 | 5.00E-05 |
| ENST00000339610 | ENSG00000125835 | SNRPB | 20:2442279-2505348 | Protein_coding_from_Ensembl | 0.682542 | 1.8443 | 0.01535 |
| ENST00000246041 | ENSG00000125843 | AP5S1 | 20:3801177-3805949 | Protein_coding_from_Ensembl | 2.57395 | 1.15619 | 0.00455 |
| ENST00000377868 | ENSG00000125864 | BFSP1 | 20:17474549-17549865 | Protein_coding_from_Ensembl | 2.53136 | 0.823859 | 0.00125 |
| ENST00000377943 | ENSG00000125870 | SNRPB2 | 20:16695488-16722421 | Protein_coding_from_Ensembl | 3.90193 | 1.88644 | 0.00225 |
| ENST00000590671 | ENSG00000125912 | NCLN | 19:3185560-3209573 | Protein_coding_from_Ensembl | 1.12691 | 0.485603 | 0.03485 |
| ENST00000592737 | ENSG00000125912 | NCLN | 19:3185560-3209573 | Protein_coding_from_Ensembl | 3.51594 | 1.53405 | 5.00E-05 |
| ENST00000588428 | ENSG00000125912 | NCLN | 19:3185560-3209573 | Protein_coding_from_Ensembl | 0.766475 | 1.93561 | 0.0484 |
| ENST00000372742 | ENSG00000125962 | ARMCX5 | X:101854095-101975591 | Protein_coding_from_Ensembl | 1.31631 | 0.638513 | 0.0217 |
| ENST00000246190 | ENSG00000125967 | NECAB3 | 20:32244892-32262269 | Protein_coding_from_Ensembl | 1.31444 | 0.450209 | 0.0148 |
| ENST00000397828 | ENSG00000126070 | AGO3 | 1:36396318-36549583 | Protein_coding_from_Ensembl | 1.26596 | 2.60335 | 0.02175 |
| ENST00000372244 | ENSG00000126106 | TMEM53 | 1:44870865-45140227 | Protein_coding_from_Ensembl | 0.215753 | 2.52904 | 0.0337 |
| ENST00000555055 | ENSG00000126215 | XRCC3 | 14:104019757-104181841 | Protein_coding_from_Ensembl | 6.78387 | 2.44693 | 5.00E-05 |
| ENST00000246532 | ENSG00000126246 | IGFLR1 | 19:36230057-36245420 | Protein_coding_from_Ensembl | 2.20909 | 0.403981 | 0.01925 |
| ENST00000586618 | ENSG00000126254 | RBM42 | 19:36119931-36128588 | Protein_coding_from_Ensembl | 2.8692 | 1.11803 | 0.0472 |
| ENST00000439527 | ENSG00000126261 | UBA2 | 19:34919256-34960853 | Protein_coding_from_Ensembl | 4.96445 | 2.05134 | 5.00E-05 |
| ENST00000592791 | ENSG00000126261 | UBA2 | 19:34919256-34960853 | Protein_coding_from_Ensembl | 1.42644 | 3.05634 | 0.03845 |
| ENST00000590048 | ENSG00000126261 | UBA2 | 19:34919256-34960853 | Protein_coding_from_Ensembl | 0.992511 | 3.74337 | 0.01305 |
| ENST00000377139 | ENSG00000126456 | IRF3 | 19:50162825-50177173 | Protein_coding_from_Ensembl | 0.225935 | 2.27866 | 0.009 |
| ENST00000526224 | ENSG00000126457 | PRMT1 | 19:50179042-50193832 | Protein_coding_from_Ensembl | 11.4663 | 1.77079 | 0.00285 |
| ENST00000391851 | ENSG00000126457 | PRMT1 | 19:50179042-50193832 | Protein_coding_from_Ensembl | 7.63676 | 16.5651 | 5.00E-05 |
| ENST00000588868 | ENSG00000126561 | STAT5A | 17:40439564-40463961 | Protein_coding_from_Ensembl | 2.9946 | 1.44755 | 5.00E-05 |
| ENST00000361523 | ENSG00000126581 | BECN1 | 17:40950809-40995777 | Protein_coding_from_Ensembl | 2.6614 | 8.08386 | 5.00E-05 |
| ENST00000571538 | ENSG00000126602 | TRAP1 | 16:3661728-3767598 | Protein_coding_from_Ensembl | 4.63708 | 1.18027 | 0.03195 |
| ENST00000396992 | ENSG00000126759 | CFP | X:47483611-47489704 | Protein_coding_from_Ensembl | 0.800615 | 2.12075 | 0.0118 |
| ENST00000394709 | ENSG00000126803 | HSPA2 | 14:64854748-65009955 | Protein_coding_from_Ensembl | 7.15839 | 2.76024 | 5.00E-05 |
| ENST00000247207 | ENSG00000126803 | HSPA2 | 14:64854748-65009955 | Protein_coding_from_Ensembl | 1.41696 | 3.93982 | 5.00E-05 |
| ENST00000583994 | ENSG00000126858 | RHOT1 | 17:30468244-30580393 | Protein_coding_from_Ensembl | 1.29741 | 0.410609 | 0.00165 |
| ENST00000545287 | ENSG00000126858 | RHOT1 | 17:30468244-30580393 | Protein_coding_from_Ensembl | 0.409756 | 1.52898 | 0.00145 |
| ENST00000375495 | ENSG00000127081 | ZNF484 | 9:95571669-95661890 | Protein_coding_from_Ensembl | 0.441591 | 1.74174 | 0.0001 |
| ENST00000455780 | ENSG00000127125 | PPCS | 1:42895999-43120335 | Protein_coding_from_Ensembl | 2.72768 | 1.34599 | 0.03895 |
| ENST00000378985 | ENSG00000127314 | RAP1B | 12:68659962-69187743 | Protein_coding_from_Ensembl | 1.74578 | 0.576555 | 0.04985 |
| ENST00000508204 | ENSG00000127419 | TMEM175 | 4:926174-952444 | Protein_coding_from_Ensembl | 3.28968 | 1.50588 | 0.00585 |
| ENST00000264771 | ENSG00000127419 | TMEM175 | 4:926174-952444 | Protein_coding_from_Ensembl | 1.20607 | 2.42504 | 0.00925 |
| ENST00000247977 | ENSG00000127452 | FBXL12 | 19:9920942-9938492 | Protein_coding_from_Ensembl | 2.68875 | 1.19144 | 0.0031 |
| ENST00000417040 | ENSG00000127481 | UBR4 | 1:19398603-19589497 | Protein_coding_from_Ensembl | 2.97519 | 1.16282 | 5.00E-05 |
| ENST00000419948 | ENSG00000127483 | HP1BP3 | 1:21069153-21113816 | Protein_coding_from_Ensembl | 10.2449 | 4.25875 | 0.0024 |
| ENST00000417710 | ENSG00000127483 | HP1BP3 | 1:21069153-21113816 | Protein_coding_from_Ensembl | 11.6372 | 4.34266 | 0.0041 |
| ENST00000293883 | ENSG00000127580 | WDR24 | 16:734621-755829 | Protein_coding_from_Ensembl | 0.3946 | 1.07833 | 0.00695 |
| ENST00000455171 | ENSG00000127586 | CHTF18 | 16:834973-850737 | Protein_coding_from_Ensembl | 1.30691 | 0.262156 | 0.0017 |
| ENST00000590574 | ENSG00000127616 | SMARCA4 | 19:11071597-11176071 | Protein_coding_from_Ensembl | 1.46292 | 0.641048 | 0.0003 |
| ENST00000450717 | ENSG00000127616 | SMARCA4 | 19:11071597-11176071 | Protein_coding_from_Ensembl | 4.72539 | 1.32508 | 5.00E-05 |
| ENST00000397133 | ENSG00000127774 | EMC6 | 17:3566188-3599698 | Protein_coding_from_Ensembl | 0.738613 | 2.94108 | 0.03415 |
| ENST00000418110 | ENSG00000127947 | PTPN12 | 7:77166591-77269388 | Protein_coding_from_Ensembl | 3.94428 | 0.964762 | 0.0407 |
| ENST00000428214 | ENSG00000127980 | PEX1 | 7:92076761-92157845 | Protein_coding_from_Ensembl | 0.466682 | 1.35192 | 0.0014 |
| ENST00000437425 | ENSG00000127990 | SGCE | 7:94214541-94285521 | Protein_coding_from_Ensembl | 2.0476 | 5.72185 | 5.00E-05 |
| ENST00000337539 | ENSG00000128271 | ADORA2A | 22:24666785-24924358 | Protein_coding_from_Ensembl | 1.66021 | 0.663476 | 0.00475 |
| ENST00000381278 | ENSG00000128274 | A4GALT | 22:43088126-43117304 | Protein_coding_from_Ensembl | 0.678209 | 3.65605 | 0.0001 |
| ENST00000249209 | ENSG00000128463 | EMC4 | 15:34517199-34522357 | Protein_coding_from_Ensembl | 2.53925 | 6.81292 | 0.00185 |
| ENST00000421797 | ENSG00000128585 | MKLN1 | 7:130538478-131182453 | Protein_coding_from_Ensembl | 0.853265 | 2.183 | 0.0113 |
| ENST00000494552 | ENSG00000128596 | CCDC136 | 7:128430810-128462186 | Protein_coding_from_Ensembl | 1.03456 | 0.487791 | 0.0146 |
| ENST00000249375 | ENSG00000128604 | IRF5 | 7:128577665-128590089 | Protein_coding_from_Ensembl | 2.6455 | 0.886773 | 5.00E-05 |
| ENST00000409156 | ENSG00000128656 | CHN1 | 2:175664090-175870097 | Protein_coding_from_Ensembl | 0.164445 | 1.30366 | 0.0304 |
| ENST00000346403 | ENSG00000128739 | SNRPN | 15:25068793-25684128 | Protein_coding_from_Ensembl | 5.29573 | 0.624909 | 0.00265 |
| ENST00000590217 | ENSG00000128789 | PSMG2 | 18:12437679-12725739 | Protein_coding_from_Ensembl | 3.82744 | 1.7228 | 0.01275 |
| ENST00000558472 | ENSG00000128951 | DUT | 15:48604549-48635570 | Protein_coding_from_Ensembl | 4.94083 | 2.33357 | 0.022 |
| ENST00000534234 | ENSG00000129083 | COPB1 | 11:14464985-14665181 | Protein_coding_from_Ensembl | 1.31211 | 3.16644 | 0.00435 |
| ENST00000396394 | ENSG00000129084 | PSMA1 | 11:14464985-14665181 | Protein_coding_from_Ensembl | 4.21686 | 1.06462 | 0.0011 |
| ENST00000395436 | ENSG00000129103 | SUMF2 | 7:56131694-56160689 | Protein_coding_from_Ensembl | 1.86368 | 0.452712 | 0.0051 |
| ENST00000265965 | ENSG00000129158 | SERGEF | 11:17809594-18063973 | Protein_coding_from_Ensembl | 3.03651 | 0.89334 | 0.00145 |
| ENST00000503182 | ENSG00000129187 | DCTD | 4:183811212-183839089 | Protein_coding_from_Ensembl | 11.4943 | 4.71077 | 0.0029 |
| ENST00000250151 | ENSG00000129277 | CCL4 | 17:34430982-34433014 | Protein_coding_from_Ensembl | 4.00711 | 1.55051 | 0.01005 |
| ENST00000551923 | ENSG00000129317 | PUS7L | 12:44122409-44152620 | Protein_coding_from_Ensembl | 0.369377 | 1.90544 | 0.0002 |
| ENST00000590009 | ENSG00000129351 | ILF3 | 19:10764936-10803093 | Protein_coding_from_Ensembl | 3.73126 | 1.85576 | 0.0327 |
| ENST00000586549 | ENSG00000129353 | SLC44A2 | 19:10713132-10755235 | Protein_coding_from_Ensembl | 1.26353 | 2.97041 | 0.0133 |
| ENST00000262102 | ENSG00000129422 | MTUS1 | 8:17433941-17658516 | Protein_coding_from_Ensembl | 3.14227 | 1.5055 | 5.00E-05 |
| ENST00000310677 | ENSG00000129467 | ADCY4 | 14:24787554-24809251 | Protein_coding_from_Ensembl | 0.204426 | 1.0143 | 0.0046 |
| ENST00000310850 | ENSG00000129480 | DTD2 | 14:31717833-31926716 | Protein_coding_from_Ensembl | 1.66579 | 0.827905 | 0.00795 |
| ENST00000538864 | ENSG00000129493 | HEATR5A | 14:31717833-31926716 | Protein_coding_from_Ensembl | 0.337861 | 0.92283 | 0.00165 |
| ENST00000404677 | ENSG00000129493 | HEATR5A | 14:31717833-31926716 | Protein_coding_from_Ensembl | 0.660324 | 1.65361 | 0.00125 |
| ENST00000413679 | ENSG00000129657 | SEC14L1 | 17:75082797-75213179 | Protein_coding_from_Ensembl | 0.908019 | 4.70519 | 5.00E-05 |
| ENST00000250937 | ENSG00000129932 | DOHH | 19:3490818-3500938 | Protein_coding_from_Ensembl | 2.13378 | 0.35142 | 0.00275 |
| ENST00000427575 | ENSG00000129932 | DOHH | 19:3490818-3500938 | Protein_coding_from_Ensembl | 0.194459 | 2.15772 | 0.0111 |
| ENST00000538575 | ENSG00000130032 | PRRG3 | X:150863595-150874396 | Protein_coding_from_Ensembl | 0.384972 | 1.61076 | 0.02555 |
| ENST00000252321 | ENSG00000130037 | KCNA5 | 12:5153084-5155949 | Protein_coding_from_Ensembl | 0.95315 | 0.4468 | 0.0377 |
| ENST00000444507 | ENSG00000130038 | EFCAB4B | 12:3715798-3873985 | Protein_coding_from_Ensembl | 2.24525 | 0.467273 | 0.00025 |
| ENST00000482354 | ENSG00000130150 | MOSPD2 | X:14891562-14940449 | Protein_coding_from_Ensembl | 1.27852 | 0.579846 | 0.0327 |
| ENST00000252455 | ENSG00000130175 | PRKCSH | 19:11531271-11561783 | Protein_coding_from_Ensembl | 0.137241 | 5.94962 | 0.0303 |
| ENST00000591462 | ENSG00000130175 | PRKCSH | 19:11531271-11561783 | Protein_coding_from_Ensembl | 12.9647 | 6.2575 | 5.00E-05 |
| ENST00000252457 | ENSG00000130177 | CDC16 | 13:115000361-115038198 | Protein_coding_from_Ensembl | 1.19561 | 3.65678 | 0.0002 |
| ENST00000324894 | ENSG00000130299 | GTPBP3 | 19:17445728-17453544 | Protein_coding_from_Ensembl | 1.44571 | 0.115407 | 0.0309 |
| ENST00000358792 | ENSG00000130299 | GTPBP3 | 19:17445728-17453544 | Protein_coding_from_Ensembl | 0.381741 | 1.61806 | 0.0079 |
| ENST00000252597 | ENSG00000130307 | USHBP1 | 19:17342691-17398455 | Protein_coding_from_Ensembl | 2.17014 | 1.08395 | 0.0008 |
| ENST00000424234 | ENSG00000130402 | ACTN4 | 19:39138288-39260544 | Protein_coding_from_Ensembl | 4.64055 | 1.2534 | 0.0005 |
| ENST00000425171 | ENSG00000130508 | PXDN | 2:1635658-1748624 | Protein_coding_from_Ensembl | 1.83681 | 4.0186 | 0.0426 |
| ENST00000595625 | ENSG00000130528 | HRC | 19:49654454-49658681 | Protein_coding_from_Ensembl | 1.42401 | 0.457871 | 0.01255 |
| ENST00000252825 | ENSG00000130528 | HRC | 19:49654454-49658681 | Protein_coding_from_Ensembl | 0.938275 | 2.08118 | 0.0044 |
| ENST00000252840 | ENSG00000130544 | ZNF557 | 19:7069454-7087979 | Protein_coding_from_Ensembl | 0.702046 | 1.46176 | 0.023 |
| ENST00000457279 | ENSG00000130592 | LSP1 | 11:1874199-1913497 | Protein_coding_from_Ensembl | 3.58778 | 1.59241 | 0.0341 |
| ENST00000446808 | ENSG00000130592 | LSP1 | 11:1874199-1913497 | Protein_coding_from_Ensembl | 4.05028 | 8.89991 | 0.0142 |
| ENST00000381558 | ENSG00000130595 | TNNT3 | 11:1940791-1959936 | Protein_coding_from_Ensembl | 2.84362 | 1.33276 | 0.01495 |
| ENST00000381561 | ENSG00000130595 | TNNT3 | 11:1940791-1959936 | Protein_coding_from_Ensembl | 0.351575 | 1.49206 | 0.0433 |
| ENST00000451429 | ENSG00000130695 | CEP85 | 1:26560690-26605299 | Protein_coding_from_Ensembl | 0.838525 | 2.0888 | 0.0008 |
| ENST00000372220 | ENSG00000130714 | POMT1 | 9:134378288-134406655 | Protein_coding_from_Ensembl | 4.18111 | 1.83583 | 0.00075 |
| ENST00000341012 | ENSG00000130714 | POMT1 | 9:134378288-134406655 | Protein_coding_from_Ensembl | 1.19252 | 2.563 | 0.00025 |
| ENST00000601220 | ENSG00000130724 | CHMP2A | 19:59062932-59066491 | Protein_coding_from_Ensembl | 10.4852 | 4.8178 | 0.0002 |
| ENST00000594806 | ENSG00000130726 | TRIM28 | 19:59055457-59062089 | Protein_coding_from_Ensembl | 9.42042 | 1.90392 | 0.0004 |
| ENST00000597136 | ENSG00000130726 | TRIM28 | 19:59055457-59062089 | Protein_coding_from_Ensembl | 9.2337 | 2.54385 | 5.00E-05 |
| ENST00000360385 | ENSG00000130803 | ZNF317 | 19:9251055-9274100 | Protein_coding_from_Ensembl | 0.23978 | 0.941839 | 0.0037 |
| ENST00000253109 | ENSG00000130812 | ANGPTL6 | 19:10196797-10213472 | Protein_coding_from_Ensembl | 0.332245 | 1.49044 | 0.01025 |
| ENST00000430077 | ENSG00000130821 | SLC6A8 | X:152935184-152962048 | Protein_coding_from_Ensembl | 1.60189 | 0.608425 | 0.01095 |
| ENST00000411977 | ENSG00000130844 | ZNF331 | 19:54024234-54083523 | Protein_coding_from_Ensembl | 3.28609 | 1.48784 | 5.00E-05 |
| ENST00000253159 | ENSG00000130856 | ZNF236 | 18:74534562-74682683 | Protein_coding_from_Ensembl | 0.0649479 | 1.16905 | 0.00185 |
| ENST00000449135 | ENSG00000130962 | PRRG1 | X:37208527-38548169 | Protein_coding_from_Ensembl | 1.78163 | 0.593573 | 5.00E-05 |
| ENST00000378628 | ENSG00000130962 | PRRG1 | X:37208527-38548169 | Protein_coding_from_Ensembl | 0.877238 | 1.83942 | 0.0009 |
| ENST00000457380 | ENSG00000130988 | RGN | X:46937774-46991582 | Protein_coding_from_Ensembl | 0.444051 | 1.04537 | 0.04015 |
| ENST00000253339 | ENSG00000131023 | LATS1 | 6:149979288-150039392 | Protein_coding_from_Ensembl | 3.39253 | 1.62708 | 5.00E-05 |
| ENST00000528062 | ENSG00000131051 | RBM39 | 20:34291530-34330234 | Protein_coding_from_Ensembl | 0.451718 | 2.32557 | 0.0012 |
| ENST00000374870 | ENSG00000131089 | ARHGEF9 | X:62854846-63005426 | Protein_coding_from_Ensembl | 0.496312 | 1.30448 | 0.0002 |
| ENST00000598676 | ENSG00000131116 | ZNF428 | 19:44100543-44143991 | Protein_coding_from_Ensembl | 2.08424 | 4.25831 | 0.02265 |
| ENST00000439754 | ENSG00000131238 | PPT1 | 1:40538378-40563375 | Protein_coding_from_Ensembl | 3.47998 | 1.2167 | 0.0417 |
| ENST00000428355 | ENSG00000131374 | TBC1D5 | 3:17198653-18959184 | Protein_coding_from_Ensembl | 1.53153 | 4.25124 | 0.0222 |
| ENST00000432519 | ENSG00000131378 | RFTN1 | 3:16014886-16555533 | Protein_coding_from_Ensembl | 1.16503 | 2.52839 | 0.0013 |
| ENST00000393340 | ENSG00000131446 | MGAT1 | 5:180217540-180242652 | Protein_coding_from_Ensembl | 4.35332 | 2.01991 | 5.00E-05 |
| ENST00000333055 | ENSG00000131446 | MGAT1 | 5:180217540-180242652 | Protein_coding_from_Ensembl | 7.02222 | 2.31207 | 5.00E-05 |
| ENST00000293362 | ENSG00000131467 | PSME3 | 17:40950809-40995777 | Protein_coding_from_Ensembl | 3.60487 | 1.44268 | 5.00E-05 |
| ENST00000541124 | ENSG00000131467 | PSME3 | 17:40950809-40995777 | Protein_coding_from_Ensembl | 0.240157 | 2.36442 | 0.0008 |
| ENST00000394722 | ENSG00000131503 | ANKHD1 | 5:139781398-139973337 | Protein_coding_from_Ensembl | 1.57283 | 0.321654 | 0.01575 |
| ENST00000539845 | ENSG00000131558 | EXOC4 | 7:132937828-133751342 | Protein_coding_from_Ensembl | 0.902325 | 2.20406 | 0.00065 |
| ENST00000531349 | ENSG00000131620 | ANO1 | 11:69911594-70035652 | Protein_coding_from_Ensembl | 1.09268 | 0.291145 | 0.00255 |
| ENST00000530746 | ENSG00000131626 | PPFIA1 | 11:70116805-70282690 | Protein_coding_from_Ensembl | 8.00999 | 3.45789 | 0.02505 |
| ENST00000371848 | ENSG00000131725 | WDR44 | X:117480035-117583924 | Protein_coding_from_Ensembl | 2.12243 | 0.763831 | 0.00095 |
| ENST00000407610 | ENSG00000131732 | ZCCHC9 | 5:80243515-81047616 | Protein_coding_from_Ensembl | 1.68359 | 0.642891 | 0.02905 |
| ENST00000380199 | ENSG00000131732 | ZCCHC9 | 5:80243515-81047616 | Protein_coding_from_Ensembl | 1.50134 | 3.72012 | 0.00415 |
| ENST00000451717 | ENSG00000131831 | RAI2 | X:17818168-17879457 | Protein_coding_from_Ensembl | 1.20357 | 0.387457 | 0.0107 |
| ENST00000509358 | ENSG00000131844 | MCCC2 | 5:70883114-70954531 | Protein_coding_from_Ensembl | 2.69922 | 0.375864 | 0.02045 |
| ENST00000554642 | ENSG00000131966 | ACTR10 | 14:58460249-58764857 | Protein_coding_from_Ensembl | 5.96544 | 1.98128 | 0.01125 |
| ENST00000421259 | ENSG00000132031 | MATN3 | 2:20189972-20212455 | Protein_coding_from_Ensembl | 1.03412 | 2.45402 | 0.01125 |
| ENST00000371843 | ENSG00000132122 | SPATA6 | 1:48761043-48937845 | Protein_coding_from_Ensembl | 0.759298 | 2.07915 | 0.00195 |
| ENST00000360679 | ENSG00000132142 | ACACA | 17:35441922-36244363 | Protein_coding_from_Ensembl | 1.11977 | 0.423614 | 5.00E-05 |
| ENST00000394406 | ENSG00000132142 | ACACA | 17:35441922-36244363 | Protein_coding_from_Ensembl | 1.79501 | 0.84698 | 5.00E-05 |
| ENST00000353139 | ENSG00000132142 | ACACA | 17:35441922-36244363 | Protein_coding_from_Ensembl | 0.847637 | 2.50497 | 5.00E-05 |
| ENST00000309576 | ENSG00000132170 | PPARG | 3:12328866-12475855 | Protein_coding_from_Ensembl | 2.60757 | 0.821091 | 0.001 |
| ENST00000396777 | ENSG00000132254 | ARFIP2 | 11:6496909-6502666 | Protein_coding_from_Ensembl | 1.83653 | 4.76056 | 5.00E-05 |
| ENST00000396847 | ENSG00000132256 | TRIM5 | 11:5274419-5959849 | Protein_coding_from_Ensembl | 0.924893 | 1.94789 | 0.0031 |
| ENST00000442664 | ENSG00000132305 | IMMT | 2:86371054-86423798 | Protein_coding_from_Ensembl | 2.88188 | 0.810967 | 5.00E-05 |
| ENST00000419070 | ENSG00000132305 | IMMT | 2:86371054-86423798 | Protein_coding_from_Ensembl | 0.84552 | 3.17358 | 0.00015 |
| ENST00000254644 | ENSG00000132313 | MRPL35 | 2:86426477-86440917 | Protein_coding_from_Ensembl | 2.6314 | 1.02283 | 0.023 |
| ENST00000440245 | ENSG00000132326 | PER2 | 2:239140324-239198743 | Protein_coding_from_Ensembl | 0.340135 | 1.04826 | 0.02285 |
| ENST00000555827 | ENSG00000132330 | SCLY | 2:238875468-239008054 | Protein_coding_from_Ensembl | 0.629722 | 1.45865 | 0.00965 |
| ENST00000392367 | ENSG00000132341 | RAN | 12:131356423-131362223 | Protein_coding_from_Ensembl | 7.79426 | 2.87494 | 0.0018 |
| ENST00000538975 | ENSG00000132361 | CLUH | 17:2592679-2616575 | Protein_coding_from_Ensembl | 2.46987 | 0.615096 | 5.00E-05 |
| ENST00000254718 | ENSG00000132382 | MYBBP1A | 17:4336982-4458926 | Protein_coding_from_Ensembl | 2.86358 | 1.253 | 5.00E-05 |
| ENST00000451522 | ENSG00000132405 | TBC1D14 | 4:6909870-7059679 | Protein_coding_from_Ensembl | 0.33358 | 0.834621 | 0.0074 |
| ENST00000254759 | ENSG00000132423 | COQ3 | 6:99817275-99842080 | Protein_coding_from_Ensembl | 0.473889 | 1.45958 | 0.0362 |
| ENST00000449880 | ENSG00000132470 | ITGB4 | 17:73717407-73761792 | Protein_coding_from_Ensembl | 4.31914 | 1.17747 | 5.00E-05 |
| ENST00000339591 | ENSG00000132470 | ITGB4 | 17:73717407-73761792 | Protein_coding_from_Ensembl | 1.71448 | 3.78811 | 5.00E-05 |
| ENST00000589599 | ENSG00000132475 | H3F3B | 17:73772514-74117657 | Protein_coding_from_Ensembl | 11.5156 | 37.6171 | 5.00E-05 |
| ENST00000391950 | ENSG00000132522 | GPS2 | 17:7210317-7232712 | Protein_coding_from_Ensembl | 1.10685 | 2.28135 | 0.0363 |
| ENST00000254898 | ENSG00000132561 | MATN2 | 8:98881067-99059896 | Protein_coding_from_Ensembl | 1.80199 | 0.853234 | 0.0019 |
| ENST00000254908 | ENSG00000132570 | PCBD2 | 5:134240595-134347392 | Protein_coding_from_Ensembl | 1.6337 | 0.544997 | 0.03575 |
| ENST00000377603 | ENSG00000132664 | POLR3F | 20:18364010-18465287 | Protein_coding_from_Ensembl | 1.7873 | 0.296589 | 0.00275 |
| ENST00000358719 | ENSG00000132670 | PTPRA | 20:2815959-3019747 | Protein_coding_from_Ensembl | 0.694437 | 2.10131 | 5.00E-05 |
| ENST00000421487 | ENSG00000132676 | DAP3 | 1:155579338-155829191 | Protein_coding_from_Ensembl | 1.42314 | 2.87276 | 0.02085 |
| ENST00000326837 | ENSG00000132716 | DCAF8 | 1:160185504-160256138 | Protein_coding_from_Ensembl | 2.39788 | 5.56748 | 5.00E-05 |
| ENST00000440682 | ENSG00000132716 | DCAF8 | 1:160185504-160256138 | Protein_coding_from_Ensembl | 4.17087 | 16.3977 | 0.0007 |
| ENST00000395782 | ENSG00000133027 | PEMT | 17:17408876-17513799 | Protein_coding_from_Ensembl | 4.86939 | 2.0659 | 0.00865 |
| ENST00000367161 | ENSG00000133059 | DSTYK | 1:205111631-205180727 | Protein_coding_from_Ensembl | 0.507434 | 1.7043 | 5.00E-05 |
| ENST00000255432 | ENSG00000133067 | LGR6 | 1:202163028-202288909 | Protein_coding_from_Ensembl | 1.2589 | 0.543684 | 0.00405 |
| ENST00000329800 | ENSG00000133069 | TMCC2 | 1:205197303-205242471 | Protein_coding_from_Ensembl | 1.08869 | 0.268942 | 0.0036 |
| ENST00000438666 | ENSG00000133104 | SPG20 | 13:36875774-36944317 | Protein_coding_from_Ensembl | 1.44656 | 0.303912 | 0.0001 |
| ENST00000361121 | ENSG00000133114 | GPALPP1 | 13:45513383-45657260 | Protein_coding_from_Ensembl | 0.449127 | 1.3459 | 0.00025 |
| ENST00000434425 | ENSG00000133119 | RFC3 | 13:34392185-34540695 | Protein_coding_from_Ensembl | 0.990189 | 2.08525 | 0.0239 |
| ENST00000255486 | ENSG00000133121 | STARD13 | 13:33677271-33924793 | Protein_coding_from_Ensembl | 0.799829 | 0.358099 | 0.0051 |
| ENST00000468024 | ENSG00000133142 | TCEAL4 | X:102831158-102842657 | Protein_coding_from_Ensembl | 6.07876 | 2.82323 | 0.00105 |
| ENST00000434216 | ENSG00000133142 | TCEAL4 | X:102831158-102842657 | Protein_coding_from_Ensembl | 1.52773 | 4.28653 | 0.0078 |
| ENST00000582769 | ENSG00000133195 | SLC39A11 | 17:70642087-71088851 | Protein_coding_from_Ensembl | 1.42499 | 4.38747 | 0.03975 |
| ENST00000377819 | ENSG00000133318 | RTN3 | 11:63448917-63527363 | Protein_coding_from_Ensembl | 1.44871 | 0.467661 | 5.00E-05 |
| ENST00000339997 | ENSG00000133318 | RTN3 | 11:63448917-63527363 | Protein_coding_from_Ensembl | 0.253828 | 1.18251 | 0.00035 |
| ENST00000282493 | ENSG00000133401 | PDZD2 | 5:31639516-32122047 | Protein_coding_from_Ensembl | 0.0389882 | 1.74869 | 0.0053 |
| ENST00000483369 | ENSG00000133597 | ADCK2 | 7:140218219-140624564 | Protein_coding_from_Ensembl | 0.662994 | 1.76655 | 0.025 |
| ENST00000473312 | ENSG00000133612 | AGAP3 | 7:150782917-150841523 | Protein_coding_from_Ensembl | 1.97165 | 0.953833 | 0.01335 |
| ENST00000356891 | ENSG00000133641 | C12orf29 | 12:88373815-88535993 | Protein_coding_from_Ensembl | 1.74466 | 0.627159 | 0.002 |
| ENST00000274562 | ENSG00000133706 | LARS | 5:145463948-145562223 | Protein_coding_from_Ensembl | 1.2914 | 5.05335 | 5.00E-05 |
| ENST00000403290 | ENSG00000133794 | ARNTL | 11:13293303-13408813 | Protein_coding_from_Ensembl | 2.68414 | 0.732277 | 0.0001 |
| ENST00000403482 | ENSG00000133794 | ARNTL | 11:13293303-13408813 | Protein_coding_from_Ensembl | 1.11375 | 2.72721 | 0.00055 |
| ENST00000396554 | ENSG00000133805 | AMPD3 | 11:10329859-10529126 | Protein_coding_from_Ensembl | 1.26672 | 0.51151 | 0.0021 |
| ENST00000396553 | ENSG00000133805 | AMPD3 | 11:10329859-10529126 | Protein_coding_from_Ensembl | 0.676515 | 1.81347 | 0.0003 |
| ENST00000525119 | ENSG00000133816 | MICAL2 | 11:12115542-12285334 | Protein_coding_from_Ensembl | 6.82963 | 1.67861 | 0.0095 |
| ENST00000510025 | ENSG00000133835 | HSD17B4 | 5:118788137-118972894 | Protein_coding_from_Ensembl | 0.423547 | 1.08733 | 0.013 |
| ENST00000555738 | ENSG00000133961 | NUMB | 14:73741814-74025651 | Protein_coding_from_Ensembl | 2.56723 | 1.20907 | 0.0155 |
| ENST00000555394 | ENSG00000133961 | NUMB | 14:73741814-74025651 | Protein_coding_from_Ensembl | 2.71549 | 5.57634 | 5.00E-05 |
| ENST00000537665 | ENSG00000134014 | ELP3 | 8:27947189-28048673 | Protein_coding_from_Ensembl | 1.41028 | 0.505516 | 0.01795 |
| ENST00000256398 | ENSG00000134014 | ELP3 | 8:27947189-28048673 | Protein_coding_from_Ensembl | 0.687428 | 4.51187 | 5.00E-05 |
| ENST00000587752 | ENSG00000134030 | CTIF | 18:46065416-46389588 | Protein_coding_from_Ensembl | 7.02672 | 2.42574 | 0.0042 |
| ENST00000370022 | ENSG00000134186 | PRPF38B | 1:109233370-109244425 | Protein_coding_from_Ensembl | 0.200723 | 2.00695 | 0.0341 |
| ENST00000369514 | ENSG00000134198 | TSPAN2 | 1:115590631-115632121 | Protein_coding_from_Ensembl | 4.96365 | 1.77613 | 0.03365 |
| ENST00000420377 | ENSG00000134242 | PTPN22 | 1:114304453-114456708 | Protein_coding_from_Ensembl | 0.437195 | 1.63578 | 0.00145 |
| ENST00000357172 | ENSG00000134255 | CEPT1 | 1:111659954-111727724 | Protein_coding_from_Ensembl | 1.69209 | 0.843259 | 0.0153 |
| ENST00000369569 | ENSG00000134262 | AP4B1 | 1:114304453-114456708 | Protein_coding_from_Ensembl | 3.72048 | 1.85571 | 5.00E-05 |
| ENST00000449797 | ENSG00000134278 | SPIRE1 | 18:12437679-12725739 | Protein_coding_from_Ensembl | 2.41556 | 10.7231 | 5.00E-05 |
| ENST00000550765 | ENSG00000134285 | FKBP11 | 12:49297200-49351334 | Protein_coding_from_Ensembl | 6.85199 | 2.3533 | 0.00045 |
| ENST00000489024 | ENSG00000134313 | KIDINS220 | 2:8865407-8977760 | Protein_coding_from_Ensembl | 4.90503 | 2.08412 | 5.00E-05 |
| ENST00000396097 | ENSG00000134324 | LPIN1 | 2:11817720-12805597 | Protein_coding_from_Ensembl | 0.486954 | 1.2066 | 0.0033 |
| ENST00000396222 | ENSG00000134333 | LDHA | 11:18415934-18429972 | Protein_coding_from_Ensembl | 8.19442 | 0.598344 | 0.00035 |
| ENST00000478970 | ENSG00000134333 | LDHA | 11:18415934-18429972 | Protein_coding_from_Ensembl | 2.14444 | 5.64212 | 0.0183 |
| ENST00000504226 | ENSG00000134363 | FST | 5:52776238-52782964 | Protein_coding_from_Ensembl | 1.2389 | 4.20494 | 0.014 |
| ENST00000398130 | ENSG00000134444 | KIAA1468 | 18:59854490-59977513 | Protein_coding_from_Ensembl | 1.22941 | 2.46227 | 5.00E-05 |
| ENST00000504878 | ENSG00000134480 | CCNH | 5:86563704-86708836 | Protein_coding_from_Ensembl | 1.69324 | 3.77584 | 0.00375 |
| ENST00000383233 | ENSG00000134490 | TMEM241 | 18:20714527-21017925 | Protein_coding_from_Ensembl | 1.54492 | 0.140662 | 0.0173 |
| ENST00000420687 | ENSG00000134508 | CABLES1 | 18:20714527-21017925 | Protein_coding_from_Ensembl | 2.25123 | 1.08783 | 0.0033 |
| ENST00000451604 | ENSG00000134532 | SOX5 | 12:23682439-24103966 | Protein_coding_from_Ensembl | 0.213528 | 2.69127 | 5.00E-05 |
| ENST00000546331 | ENSG00000134533 | RERG | 12:15260716-15750333 | Protein_coding_from_Ensembl | 2.05879 | 5.45735 | 0.0002 |
| ENST00000381908 | ENSG00000134539 | KLRD1 | 12:10378656-10469850 | Protein_coding_from_Ensembl | 1.04748 | 0.36509 | 0.0055 |
| ENST00000481105 | ENSG00000134602 | MST4 | X:131157292-131209971 | Protein_coding_from_Ensembl | 0.179885 | 1.09477 | 0.0486 |
| ENST00000426105 | ENSG00000134644 | PUM1 | 1:31404352-31538838 | Protein_coding_from_Ensembl | 1.23256 | 0.0826091 | 0.01795 |
| ENST00000525843 | ENSG00000134644 | PUM1 | 1:31404352-31538838 | Protein_coding_from_Ensembl | 1.46039 | 0.582277 | 0.0004 |
| ENST00000484036 | ENSG00000134717 | BTF3L4 | 1:52485802-52556388 | Protein_coding_from_Ensembl | 2.99608 | 1.38497 | 0.03105 |
| ENST00000543510 | ENSG00000134825 | TMEM258 | 11:61447904-61634826 | Protein_coding_from_Ensembl | 1.42556 | 0.587266 | 0.0384 |
| ENST00000455100 | ENSG00000134864 | GGACT | 13:101183809-101241782 | Protein_coding_from_Ensembl | 1.7663 | 0.455387 | 0.02025 |
| ENST00000376440 | ENSG00000134882 | UBAC2 | 13:99853027-100038753 | Protein_coding_from_Ensembl | 1.05697 | 0.246473 | 0.01145 |
| ENST00000526145 | ENSG00000134954 | ETS1 | 11:128328655-128457453 | Protein_coding_from_Ensembl | 2.75945 | 7.62527 | 5.00E-05 |
| ENST00000457016 | ENSG00000134982 | APC | 5:112043194-112258236 | Protein_coding_from_Ensembl | 5.01964 | 2.37923 | 5.00E-05 |
| ENST00000257430 | ENSG00000134982 | APC | 5:112043194-112258236 | Protein_coding_from_Ensembl | 0.362587 | 4.14074 | 5.00E-05 |
| ENST00000447165 | ENSG00000134986 | NREP | 5:110831730-111353006 | Protein_coding_from_Ensembl | 1.08455 | 3.86208 | 5.00E-05 |
| ENST00000456643 | ENSG00000135046 | ANXA1 | 9:75705766-75839108 | Protein_coding_from_Ensembl | 1.71823 | 4.71336 | 0.01745 |
| ENST00000342020 | ENSG00000135047 | CTSL | 9:90340433-90346382 | Protein_coding_from_Ensembl | 1.72562 | 0.642666 | 0.04885 |
| ENST00000452279 | ENSG00000135070 | ISCA1 | 9:88879460-88897676 | Protein_coding_from_Ensembl | 2.46237 | 1.16934 | 0.03675 |
| ENST00000257566 | ENSG00000135111 | TBX3 | 12:115108058-115121969 | Protein_coding_from_Ensembl | 1.01773 | 0.259745 | 0.00125 |
| ENST00000257604 | ENSG00000135148 | TRAFD1 | 12:112563304-112591407 | Protein_coding_from_Ensembl | 0.823211 | 1.68215 | 0.0044 |
| ENST00000447544 | ENSG00000135218 | CD36 | 7:79959507-80308593 | Protein_coding_from_Ensembl | 10.0149 | 4.99996 | 5.00E-05 |
| ENST00000426978 | ENSG00000135218 | CD36 | 7:79959507-80308593 | Protein_coding_from_Ensembl | 2.75883 | 7.34186 | 0.0108 |
| ENST00000436062 | ENSG00000135241 | PNPLA8 | 7:108110865-108215294 | Protein_coding_from_Ensembl | 2.82362 | 1.32279 | 0.0001 |
| ENST00000489828 | ENSG00000135250 | SRPK2 | 7:104581509-105039755 | Protein_coding_from_Ensembl | 1.64735 | 4.76255 | 5.00E-05 |
| ENST00000415954 | ENSG00000135297 | MTO1 | 6:74171300-74218959 | Protein_coding_from_Ensembl | 0.749457 | 1.71834 | 0.00225 |
| ENST00000447838 | ENSG00000135299 | ANKRD6 | 6:90142888-90348472 | Protein_coding_from_Ensembl | 0.771137 | 1.99283 | 0.0007 |
| ENST00000514419 | ENSG00000135317 | SNX14 | 6:86215213-86353510 | Protein_coding_from_Ensembl | 4.10911 | 1.9007 | 0.03265 |
| ENST00000418153 | ENSG00000135365 | PHF21A | 11:45950870-46142985 | Protein_coding_from_Ensembl | 0.455834 | 1.176 | 0.0106 |
| ENST00000524497 | ENSG00000135365 | PHF21A | 11:45950870-46142985 | Protein_coding_from_Ensembl | 0.871056 | 3.59184 | 0.0354 |
| ENST00000257879 | ENSG00000135424 | ITGA7 | 12:56075329-56118526 | Protein_coding_from_Ensembl | 2.71104 | 0.115641 | 0.0048 |
| ENST00000449076 | ENSG00000135426 | TESPA1 | 12:55341801-55378530 | Protein_coding_from_Ensembl | 1.1227 | 0.144125 | 0.03315 |
| ENST00000549867 | ENSG00000135457 | TFCP2 | 12:51487445-51566926 | Protein_coding_from_Ensembl | 0.997576 | 2.4743 | 0.00395 |
| ENST00000413095 | ENSG00000135506 | OS9 | 12:58087737-58115340 | Protein_coding_from_Ensembl | 2.73196 | 0.183694 | 0.0477 |
| ENST00000324953 | ENSG00000135535 | CD164 | 6:109687716-109703762 | Protein_coding_from_Ensembl | 2.96244 | 1.23558 | 0.00015 |
| ENST00000327035 | ENSG00000135541 | AHI1 | 6:135604669-136037193 | Protein_coding_from_Ensembl | 3.92027 | 1.44837 | 5.00E-05 |
| ENST00000258104 | ENSG00000135636 | DYSF | 2:71680851-71913898 | Protein_coding_from_Ensembl | 1.47454 | 0.392955 | 5.00E-05 |
| ENST00000539479 | ENSG00000135679 | MDM2 | 12:69201955-69365350 | Protein_coding_from_Ensembl | 5.8504 | 2.0668 | 0.00365 |
| ENST00000517852 | ENSG00000135679 | MDM2 | 12:69201955-69365350 | Protein_coding_from_Ensembl | 10.4882 | 3.70886 | 0.02715 |
| ENST00000440564 | ENSG00000135720 | DYNC1LI2 | 16:66754795-66788643 | Protein_coding_from_Ensembl | 3.22569 | 1.17842 | 0.0106 |
| ENST00000443351 | ENSG00000135720 | DYNC1LI2 | 16:66754795-66788643 | Protein_coding_from_Ensembl | 1.24099 | 6.06471 | 0.00015 |
| ENST00000366668 | ENSG00000135775 | COG2 | 1:230778234-230829728 | Protein_coding_from_Ensembl | 0.883965 | 0.404699 | 0.03495 |
| ENST00000367728 | ENSG00000135845 | PIGC | 1:171810620-172437971 | Protein_coding_from_Ensembl | 0.642667 | 1.31695 | 0.02835 |
| ENST00000358662 | ENSG00000135899 | SP110 | 2:230989748-231268447 | Protein_coding_from_Ensembl | 1.41479 | 3.28558 | 5.00E-05 |
| ENST00000392102 | ENSG00000135912 | TTLL4 | 2:219575567-219620139 | Protein_coding_from_Ensembl | 1.71721 | 0.454135 | 5.00E-05 |
| ENST00000409704 | ENSG00000135916 | ITM2C | 2:231729353-231743963 | Protein_coding_from_Ensembl | 2.80184 | 0.600116 | 0.0048 |
| ENST00000447280 | ENSG00000135919 | SERPINE2 | 2:224839764-224904036 | Protein_coding_from_Ensembl | 1.69672 | 0.399722 | 0.0142 |
| ENST00000445635 | ENSG00000135926 | TMBIM1 | 2:219135114-219232822 | Protein_coding_from_Ensembl | 0.567812 | 1.74497 | 0.02645 |
| ENST00000545312 | ENSG00000136040 | PLXNC1 | 12:94542498-94853764 | Protein_coding_from_Ensembl | 1.22288 | 0.424368 | 0.0248 |
| ENST00000551662 | ENSG00000136044 | APPL2 | 12:105567073-105806934 | Protein_coding_from_Ensembl | 0.33459 | 1.00362 | 0.02625 |
| ENST00000411411 | ENSG00000136052 | SLC41A2 | 12:105196330-105352522 | Protein_coding_from_Ensembl | 6.04255 | 2.92632 | 0.03435 |
| ENST00000378101 | ENSG00000136098 | NEK3 | 13:52611092-52733996 | Protein_coding_from_Ensembl | 0.598356 | 1.36679 | 0.0183 |
| ENST00000378034 | ENSG00000136108 | CKAP2 | 13:53029563-53050763 | Protein_coding_from_Ensembl | 0.449226 | 1.05488 | 0.03615 |
| ENST00000378302 | ENSG00000136144 | RCBTB1 | 13:50106081-50159719 | Protein_coding_from_Ensembl | 0.861947 | 2.86098 | 5.00E-05 |
| ENST00000488958 | ENSG00000136147 | PHF11 | 13:50069745-50103123 | Protein_coding_from_Ensembl | 3.95519 | 1.02956 | 0.0015 |
| ENST00000544492 | ENSG00000136161 | RCBTB2 | 13:49063094-49107897 | Protein_coding_from_Ensembl | 0.940284 | 2.02515 | 0.03745 |
| ENST00000350427 | ENSG00000136197 | C7orf25 | 7:42948324-42988557 | Protein_coding_from_Ensembl | 0.479063 | 1.02812 | 0.03505 |
| ENST00000361278 | ENSG00000136270 | TBRG4 | 7:45139698-45151646 | Protein_coding_from_Ensembl | 1.49434 | 0.637287 | 0.01635 |
| ENST00000468694 | ENSG00000136279 | DBNL | 7:44084238-44109055 | Protein_coding_from_Ensembl | 2.22906 | 0.722721 | 0.0019 |
| ENST00000474617 | ENSG00000136280 | CCM2 | 7:45028140-45116069 | Protein_coding_from_Ensembl | 3.0052 | 1.21877 | 0.0041 |
| ENST00000258781 | ENSG00000136280 | CCM2 | 7:45028140-45116069 | Protein_coding_from_Ensembl | 5.01448 | 1.60182 | 5.00E-05 |
| ENST00000381112 | ENSG00000136280 | CCM2 | 7:45028140-45116069 | Protein_coding_from_Ensembl | 1.22309 | 3.02397 | 0.0002 |
| ENST00000403167 | ENSG00000136295 | TTYH3 | 7:2671584-2704436 | Protein_coding_from_Ensembl | 1.30651 | 0.400993 | 5.00E-05 |
| ENST00000407643 | ENSG00000136295 | TTYH3 | 7:2671584-2704436 | Protein_coding_from_Ensembl | 1.52614 | 0.65029 | 0.0003 |
| ENST00000424009 | ENSG00000136504 | KAT7 | 17:47778304-47906458 | Protein_coding_from_Ensembl | 0.896428 | 0.214509 | 0.0077 |
| ENST00000450518 | ENSG00000136518 | ACTL6A | 3:179280667-179322442 | Protein_coding_from_Ensembl | 0.541905 | 1.53072 | 0.0203 |
| ENST00000493866 | ENSG00000136521 | NDUFB5 | 3:179322477-179345435 | Protein_coding_from_Ensembl | 0.481364 | 1.00388 | 0.0072 |
| ENST00000392659 | ENSG00000136522 | MRPL47 | 3:179280667-179322442 | Protein_coding_from_Ensembl | 3.39862 | 8.32541 | 0.003 |
| ENST00000382191 | ENSG00000136527 | TRA2B | 3:185633693-185655924 | Protein_coding_from_Ensembl | 2.6582 | 5.57956 | 0.00705 |
| ENST00000426052 | ENSG00000136603 | SKIL | 3:170075465-170115015 | Protein_coding_from_Ensembl | 1.21662 | 0.372772 | 0.0094 |
| ENST00000609181 | ENSG00000136628 | EPRS | 1:219858768-220321380 | Protein_coding_from_Ensembl | 0.194957 | 1.13152 | 0.00875 |
| ENST00000351288 | ENSG00000136699 | SMPD4 | 2:130908964-130948302 | Protein_coding_from_Ensembl | 3.04614 | 1.18697 | 5.00E-05 |
| ENST00000393040 | ENSG00000136717 | BIN1 | 2:127805602-127874626 | Protein_coding_from_Ensembl | 1.8705 | 4.09682 | 5.00E-05 |
| ENST00000343609 | ENSG00000136840 | ST6GALNAC4 | 9:130670164-130679317 | Protein_coding_from_Ensembl | 1.90368 | 0.455112 | 0.0068 |
| ENST00000259365 | ENSG00000136842 | TMOD1 | 9:100263461-100436030 | Protein_coding_from_Ensembl | 0.606091 | 1.4405 | 0.0026 |
| ENST00000482047 | ENSG00000136861 | CDK5RAP2 | 9:123151146-123342448 | Protein_coding_from_Ensembl | 5.28605 | 11.1056 | 0.0091 |
| ENST00000555206 | ENSG00000136866 | ZFP37 | 9:115759494-115819039 | Protein_coding_from_Ensembl | 1.35425 | 0.365797 | 0.0049 |
| ENST00000259395 | ENSG00000136870 | ZNF189 | 9:104161135-104172942 | Protein_coding_from_Ensembl | 0.612743 | 2.23967 | 0.0001 |
| ENST00000314392 | ENSG00000136908 | DPM2 | 9:130696781-130742792 | Protein_coding_from_Ensembl | 2.56892 | 1.21222 | 0.012 |
| ENST00000350199 | ENSG00000137075 | RNF38 | 9:36336392-36487545 | Protein_coding_from_Ensembl | 1.64797 | 0.697791 | 0.00025 |
| ENST00000353739 | ENSG00000137075 | RNF38 | 9:36336392-36487545 | Protein_coding_from_Ensembl | 0.96235 | 2.69674 | 5.00E-05 |
| ENST00000377991 | ENSG00000137103 | TMEM8B | 9:35812956-35854844 | Protein_coding_from_Ensembl | 1.33484 | 0.166002 | 0.0046 |
| ENST00000439587 | ENSG00000137103 | TMEM8B | 9:35812956-35854844 | Protein_coding_from_Ensembl | 0.542932 | 1.38524 | 0.0147 |
| ENST00000602925 | ENSG00000137145 | DENND4C | 9:19230432-19374139 | Protein_coding_from_Ensembl | 0.545972 | 1.15613 | 0.0004 |
| ENST00000394142 | ENSG00000137161 | CNPY3 | 6:42895567-42907025 | Protein_coding_from_Ensembl | 2.41106 | 5.40803 | 0.00025 |
| ENST00000373063 | ENSG00000137166 | FOXP4 | 6:41462590-41570122 | Protein_coding_from_Ensembl | 0.838813 | 0.392553 | 0.0029 |
| ENST00000531979 | ENSG00000137185 | ZSCAN9 | 6:28192663-28201260 | Protein_coding_from_Ensembl | 4.64285 | 0.572581 | 0.00025 |
| ENST00000259748 | ENSG00000137218 | FRS3 | 6:41737913-41863099 | Protein_coding_from_Ensembl | 0.484258 | 1.12117 | 0.03395 |
| ENST00000436008 | ENSG00000137266 | SLC22A23 | 6:3217333-3484305 | Protein_coding_from_Ensembl | 0.426612 | 1.78786 | 5.00E-05 |
| ENST00000376257 | ENSG00000137310 | TCF19 | 6:31126318-31154249 | Protein_coding_from_Ensembl | 0.894424 | 1.81276 | 0.0026 |
| ENST00000413165 | ENSG00000137312 | FLOT1 | 6:30695485-30710510 | Protein_coding_from_Ensembl | 1.71685 | 3.57048 | 0.03695 |
| ENST00000376377 | ENSG00000137331 | IER3 | 6:30710567-30712331 | Protein_coding_from_Ensembl | 1.9761 | 0.38568 | 0.01905 |
| ENST00000376405 | ENSG00000137337 | MDC1 | 6:30667583-30685666 | Protein_coding_from_Ensembl | 1.95589 | 0.347402 | 5.00E-05 |
| ENST00000538197 | ENSG00000137449 | CPEB2 | 4:15004297-15447790 | Protein_coding_from_Ensembl | 0.517506 | 1.08729 | 0.00075 |
| ENST00000382395 | ENSG00000137449 | CPEB2 | 4:15004297-15447790 | Protein_coding_from_Ensembl | 0.921307 | 2.58083 | 5.00E-05 |
| ENST00000345451 | ENSG00000137449 | CPEB2 | 4:15004297-15447790 | Protein_coding_from_Ensembl | 1.74514 | 3.49544 | 0.0013 |
| ENST00000422375 | ENSG00000137478 | FCHSD2 | 11:72525352-72853306 | Protein_coding_from_Ensembl | 3.45795 | 11.2989 | 0.0021 |
| ENST00000532525 | ENSG00000137486 | ARRB1 | 11:74975225-75062873 | Protein_coding_from_Ensembl | 4.81121 | 1.66113 | 0.00385 |
| ENST00000428359 | ENSG00000137491 | SLCO2B1 | 11:74810216-74954742 | Protein_coding_from_Ensembl | 3.13129 | 6.97208 | 5.00E-05 |
| ENST00000533342 | ENSG00000137494 | ANKRD42 | 11:82868029-83134559 | Protein_coding_from_Ensembl | 0.553323 | 1.23808 | 0.0469 |
| ENST00000527794 | ENSG00000137501 | SYTL2 | 11:85405266-85522184 | Protein_coding_from_Ensembl | 4.69623 | 0.556993 | 0.03645 |
| ENST00000535099 | ENSG00000137509 | PRCP | 11:82534543-82782965 | Protein_coding_from_Ensembl | 0.472529 | 7.32328 | 0.0007 |
| ENST00000424270 | ENSG00000137575 | SDCBP | 8:59465482-59495419 | Protein_coding_from_Ensembl | 3.55465 | 9.50435 | 5.00E-05 |
| ENST00000511633 | ENSG00000137601 | NEK1 | 4:170314425-170533780 | Protein_coding_from_Ensembl | 1.41446 | 0.538844 | 5.00E-05 |
| ENST00000360497 | ENSG00000137672 | TRPC6 | 11:101322294-101743293 | Protein_coding_from_Ensembl | 1.6303 | 0.275041 | 0.00245 |
| ENST00000532133 | ENSG00000137672 | TRPC6 | 11:101322294-101743293 | Protein_coding_from_Ensembl | 0.336413 | 1.58157 | 0.00125 |
| ENST00000524575 | ENSG00000137693 | YAP1 | 11:101981191-102104154 | Protein_coding_from_Ensembl | 0.338651 | 1.02504 | 0.0431 |
| ENST00000524756 | ENSG00000137727 | ARHGAP20 | 11:110447765-110583912 | Protein_coding_from_Ensembl | 1.22798 | 0.540561 | 0.00045 |
| ENST00000417449 | ENSG00000137760 | ALKBH8 | 11:107373451-107436472 | Protein_coding_from_Ensembl | 1.08109 | 0.422746 | 0.028 |
| ENST00000558373 | ENSG00000137770 | CTDSPL2 | 15:44719431-44955876 | Protein_coding_from_Ensembl | 1.1288 | 0.308571 | 0.00095 |
| ENST00000249736 | ENSG00000137776 | SLTM | 15:59063390-59394178 | Protein_coding_from_Ensembl | 7.17467 | 3.06995 | 0.00035 |
| ENST00000260359 | ENSG00000137804 | NUSAP1 | 15:41624891-41673248 | Protein_coding_from_Ensembl | 0.32704 | 1.41022 | 0.0042 |
| ENST00000560978 | ENSG00000137806 | NDUFAF1 | 15:41679550-41694717 | Protein_coding_from_Ensembl | 3.84724 | 1.61293 | 0.02305 |
| ENST00000423218 | ENSG00000137809 | ITGA11 | 15:68594049-68724501 | Protein_coding_from_Ensembl | 0.47095 | 1.91188 | 5.00E-05 |
| ENST00000569795 | ENSG00000137817 | PARP6 | 15:72533521-72888847 | Protein_coding_from_Ensembl | 1.36175 | 0.399158 | 0.0082 |
| ENST00000338426 | ENSG00000137834 | SMAD6 | 15:66994565-67074338 | Protein_coding_from_Ensembl | 1.42121 | 0.50272 | 0.03505 |
| ENST00000457357 | ENSG00000137834 | SMAD6 | 15:66994565-67074338 | Protein_coding_from_Ensembl | 0.528948 | 2.96815 | 0.00115 |
| ENST00000316364 | ENSG00000137872 | SEMA6D | 15:47476297-48066420 | Protein_coding_from_Ensembl | 2.21387 | 0.993241 | 5.00E-05 |
| ENST00000559196 | ENSG00000137872 | SEMA6D | 15:47476297-48066420 | Protein_coding_from_Ensembl | 4.75059 | 1.30833 | 0.00995 |
| ENST00000536845 | ENSG00000137872 | SEMA6D | 15:47476297-48066420 | Protein_coding_from_Ensembl | 1.04127 | 2.19754 | 0.0002 |
| ENST00000260502 | ENSG00000137936 | BCAR3 | 1:94026411-94317158 | Protein_coding_from_Ensembl | 6.05345 | 1.86152 | 5.00E-05 |
| ENST00000370244 | ENSG00000137936 | BCAR3 | 1:94026411-94317158 | Protein_coding_from_Ensembl | 0.346075 | 2.90415 | 5.00E-05 |
| ENST00000424449 | ENSG00000137942 | FNBP1L | 1:93913687-94020218 | Protein_coding_from_Ensembl | 2.94942 | 1.34283 | 0.00575 |
| ENST00000370253 | ENSG00000137942 | FNBP1L | 1:93913687-94020218 | Protein_coding_from_Ensembl | 1.23146 | 3.34067 | 5.00E-05 |
| ENST00000370131 | ENSG00000137992 | DBT | 1:100652474-100715390 | Protein_coding_from_Ensembl | 0.840332 | 2.07185 | 0.0129 |
| ENST00000402394 | ENSG00000138028 | CGREF1 | 2:27309614-27341995 | Protein_coding_from_Ensembl | 0.878774 | 2.22965 | 0.00425 |
| ENST00000260619 | ENSG00000138050 | THUMPD2 | 2:39963199-40006416 | Protein_coding_from_Ensembl | 1.51618 | 0.356997 | 0.02985 |
| ENST00000434523 | ENSG00000138081 | FBXO11 | 2:47922668-48468141 | Protein_coding_from_Ensembl | 1.36209 | 3.3089 | 0.00085 |
| ENST00000473706 | ENSG00000138092 | CENPO | 2:25012602-25142708 | Protein_coding_from_Ensembl | 0.204378 | 1.29624 | 0.0004 |
| ENST00000446605 | ENSG00000138107 | ACTR1A | 10:104238752-104262482 | Protein_coding_from_Ensembl | 2.84992 | 7.6708 | 5.00E-05 |
| ENST00000371469 | ENSG00000138207 | RBP4 | 10:95326421-95365532 | Protein_coding_from_Ensembl | 8.76621 | 19.0697 | 5.00E-05 |
| ENST00000443446 | ENSG00000138293 | NCOA4 | 10:51565107-51590734 | Protein_coding_from_Ensembl | 0.927995 | 1.95498 | 0.00165 |
| ENST00000357276 | ENSG00000138375 | SMARCAL1 | 2:217250010-217443933 | Protein_coding_from_Ensembl | 2.5515 | 1.11091 | 0.0003 |
| ENST00000409001 | ENSG00000138434 | SSFA2 | 2:182756559-182795465 | Protein_coding_from_Ensembl | 3.86622 | 1.88952 | 5.00E-05 |
| ENST00000360356 | ENSG00000138496 | PARP9 | 3:122246770-122294050 | Protein_coding_from_Ensembl | 0.471922 | 1.68396 | 0.0005 |
| ENST00000560540 | ENSG00000138606 | SHF | 15:45384847-45493373 | Protein_coding_from_Ensembl | 2.65866 | 0.972605 | 0.001 |
| ENST00000543145 | ENSG00000138623 | SEMA7A | 15:74701629-74726808 | Protein_coding_from_Ensembl | 2.60646 | 0.405576 | 0.00055 |
| ENST00000395081 | ENSG00000138629 | UBL7 | 15:74738317-74753523 | Protein_coding_from_Ensembl | 0.280739 | 3.20101 | 0.01335 |
| ENST00000264343 | ENSG00000138639 | ARHGAP24 | 4:86396266-86923823 | Protein_coding_from_Ensembl | 0.839631 | 0.307876 | 0.00435 |
| ENST00000543098 | ENSG00000138668 | HNRNPD | 4:83273650-83305180 | Protein_coding_from_Ensembl | 0.607448 | 4.53489 | 0.00205 |
| ENST00000500777 | ENSG00000138674 | SEC31A | 4:83739813-83934079 | Protein_coding_from_Ensembl | 0.23822 | 5.61572 | 0.00015 |
| ENST00000395226 | ENSG00000138678 | AGPAT9 | 4:84457066-84527028 | Protein_coding_from_Ensembl | 1.84494 | 0.720727 | 0.0023 |
| ENST00000264572 | ENSG00000138698 | RAP1GDS1 | 4:99172838-99365012 | Protein_coding_from_Ensembl | 0.048858 | 0.993733 | 0.0372 |
| ENST00000453712 | ENSG00000138698 | RAP1GDS1 | 4:99172838-99365012 | Protein_coding_from_Ensembl | 0.573698 | 1.27036 | 0.0186 |
| ENST00000394288 | ENSG00000138709 | LARP1B | 4:128982422-129144086 | Protein_coding_from_Ensembl | 2.61949 | 1.1613 | 0.002 |
| ENST00000420633 | ENSG00000138735 | PDE5A | 4:120355716-120551908 | Protein_coding_from_Ensembl | 4.62318 | 2.25006 | 0.0424 |
| ENST00000515506 | ENSG00000138767 | CNOT6L | 4:78634540-78740769 | Protein_coding_from_Ensembl | 2.18231 | 0.683308 | 5.00E-05 |
| ENST00000505983 | ENSG00000138767 | CNOT6L | 4:78634540-78740769 | Protein_coding_from_Ensembl | 3.62252 | 1.79725 | 0.04315 |
| ENST00000512485 | ENSG00000138767 | CNOT6L | 4:78634540-78740769 | Protein_coding_from_Ensembl | 2.39979 | 5.78659 | 5.00E-05 |
| ENST00000441296 | ENSG00000138768 | USO1 | 4:76567965-76735382 | Protein_coding_from_Ensembl | 0.369104 | 2.21227 | 0.0005 |
| ENST00000525819 | ENSG00000138814 | PPP3CA | 4:101944565-102270040 | Protein_coding_from_Ensembl | 18.0614 | 3.79559 | 0.00025 |
| ENST00000394646 | ENSG00000138835 | RGS3 | 9:116207010-116360018 | Protein_coding_from_Ensembl | 2.04719 | 0.712695 | 0.0006 |
| ENST00000343817 | ENSG00000138835 | RGS3 | 9:116207010-116360018 | Protein_coding_from_Ensembl | 1.12402 | 3.22158 | 5.00E-05 |
| ENST00000415224 | ENSG00000138964 | PARVG | 22:44568835-44615413 | Protein_coding_from_Ensembl | 2.9191 | 0.820494 | 0.00055 |
| ENST00000546017 | ENSG00000139112 | GABARAPL1 | 12:10365056-10375727 | Protein_coding_from_Ensembl | 2.8269 | 0.722111 | 0.0003 |
| ENST00000421801 | ENSG00000139112 | GABARAPL1 | 12:10365056-10375727 | Protein_coding_from_Ensembl | 3.3437 | 0.858523 | 0.01455 |
| ENST00000544284 | ENSG00000139112 | GABARAPL1 | 12:10365056-10375727 | Protein_coding_from_Ensembl | 4.91934 | 1.13836 | 0.0231 |
| ENST00000531134 | ENSG00000139132 | FGD4 | 12:32552462-32798984 | Protein_coding_from_Ensembl | 0.502392 | 1.08701 | 0.0173 |
| ENST00000539409 | ENSG00000139146 | FAM60A | 12:31433517-31479992 | Protein_coding_from_Ensembl | 1.15716 | 0.201602 | 0.0063 |
| ENST00000445766 | ENSG00000139174 | PRICKLE1 | 12:42632248-42984157 | Protein_coding_from_Ensembl | 1.49901 | 0.376555 | 0.00045 |
| ENST00000455697 | ENSG00000139174 | PRICKLE1 | 12:42632248-42984157 | Protein_coding_from_Ensembl | 0.462479 | 1.4867 | 0.0003 |
| ENST00000266564 | ENSG00000139197 | PEX5 | 12:7319269-7371170 | Protein_coding_from_Ensembl | 1.48006 | 0.66821 | 0.00395 |
| ENST00000550413 | ENSG00000139211 | AMIGO2 | 12:47469489-47630443 | Protein_coding_from_Ensembl | 0.674351 | 1.64448 | 0.0019 |
| ENST00000548586 | ENSG00000139220 | PPFIA2 | 12:81652044-82153332 | Protein_coding_from_Ensembl | 1.10259 | 0.387334 | 0.0014 |
| ENST00000550584 | ENSG00000139220 | PPFIA2 | 12:81652044-82153332 | Protein_coding_from_Ensembl | 1.08559 | 3.24867 | 5.00E-05 |
| ENST00000411739 | ENSG00000139350 | NEDD1 | 12:97301000-97347129 | Protein_coding_from_Ensembl | 1.09091 | 0.536179 | 0.03675 |
| ENST00000360185 | ENSG00000139436 | GIT2 | 12:110338068-110434194 | Protein_coding_from_Ensembl | 2.81173 | 0.898002 | 5.00E-05 |
| ENST00000551209 | ENSG00000139436 | GIT2 | 12:110338068-110434194 | Protein_coding_from_Ensembl | 0.567089 | 1.64376 | 0.0085 |
| ENST00000381718 | ENSG00000139496 | NUPL1 | 13:25875661-25923938 | Protein_coding_from_Ensembl | 0.944206 | 2.81598 | 0.0001 |
| ENST00000547586 | ENSG00000139531 | SUOX | 12:56390963-56400425 | Protein_coding_from_Ensembl | 1.66871 | 0.206043 | 0.02045 |
| ENST00000394109 | ENSG00000139531 | SUOX | 12:56390963-56400425 | Protein_coding_from_Ensembl | 0.363141 | 1.15815 | 0.0064 |
| ENST00000267085 | ENSG00000139631 | CSAD | 12:53551446-53584596 | Protein_coding_from_Ensembl | 1.23629 | 0.598233 | 0.0224 |
| ENST00000541590 | ENSG00000139641 | ESYT1 | 12:56511942-56538455 | Protein_coding_from_Ensembl | 5.99873 | 0.634106 | 5.00E-05 |
| ENST00000267113 | ENSG00000139641 | ESYT1 | 12:56511942-56538455 | Protein_coding_from_Ensembl | 0.094619 | 3.88029 | 0.01805 |
| ENST00000412582 | ENSG00000139684 | ESD | 13:47345390-47371367 | Protein_coding_from_Ensembl | 1.14243 | 0.0983225 | 0.0439 |
| ENST00000451881 | ENSG00000139842 | CUL4A | 13:113831890-113919399 | Protein_coding_from_Ensembl | 6.35094 | 1.22769 | 5.00E-05 |
| ENST00000326335 | ENSG00000139842 | CUL4A | 13:113831890-113919399 | Protein_coding_from_Ensembl | 3.08227 | 8.98398 | 5.00E-05 |
| ENST00000555936 | ENSG00000139926 | FRMD6 | 14:51921229-52197445 | Protein_coding_from_Ensembl | 1.57866 | 4.57076 | 0.0341 |
| ENST00000554681 | ENSG00000139990 | DCAF5 | 14:69517597-69619867 | Protein_coding_from_Ensembl | 3.00431 | 0.915 | 0.03895 |
| ENST00000267512 | ENSG00000139998 | RAB15 | 14:65381078-65569413 | Protein_coding_from_Ensembl | 1.91751 | 0.46413 | 0.00025 |
| ENST00000267540 | ENSG00000140022 | STON2 | 14:81726999-81902809 | Protein_coding_from_Ensembl | 2.73506 | 6.19129 | 5.00E-05 |
| ENST00000419727 | ENSG00000140044 | JDP2 | 14:75890385-75940814 | Protein_coding_from_Ensembl | 2.37759 | 6.29015 | 0.00065 |
| ENST00000499851 | ENSG00000140153 | WDR20 | 14:102547074-102771537 | Protein_coding_from_Ensembl | 2.12086 | 0.35323 | 0.0056 |
| ENST00000556511 | ENSG00000140153 | WDR20 | 14:102547074-102771537 | Protein_coding_from_Ensembl | 2.65686 | 0.858252 | 0.0034 |
| ENST00000398014 | ENSG00000140157 | NIPA2 | 15:22892004-23034427 | Protein_coding_from_Ensembl | 0.432293 | 1.84823 | 0.0002 |
| ENST00000343827 | ENSG00000140262 | TCF12 | 15:57210820-57591479 | Protein_coding_from_Ensembl | 0.837874 | 1.6909 | 0.0019 |
| ENST00000403425 | ENSG00000140264 | SERF2 | 15:44019115-44095241 | Protein_coding_from_Ensembl | 1.48501 | 6.17255 | 0.01255 |
| ENST00000562072 | ENSG00000140265 | ZSCAN29 | 15:43650369-44010458 | Protein_coding_from_Ensembl | 1.83286 | 0.201301 | 0.0149 |
| ENST00000415213 | ENSG00000140299 | BNIP2 | 15:59887073-59981733 | Protein_coding_from_Ensembl | 2.13221 | 4.61999 | 0.0016 |
| ENST00000560589 | ENSG00000140332 | TLE3 | 15:70340128-70390515 | Protein_coding_from_Ensembl | 0.197448 | 0.888947 | 0.00655 |
| ENST00000558870 | ENSG00000140368 | PSTPIP1 | 15:77285699-77329673 | Protein_coding_from_Ensembl | 0.994132 | 4.94272 | 0.04165 |
| ENST00000561277 | ENSG00000140391 | TSPAN3 | 15:77336021-77376326 | Protein_coding_from_Ensembl | 2.17721 | 4.87739 | 0.00045 |
| ENST00000424443 | ENSG00000140391 | TSPAN3 | 15:77336021-77376326 | Protein_coding_from_Ensembl | 3.90322 | 9.06653 | 5.00E-05 |
| ENST00000560569 | ENSG00000140395 | WDR61 | 15:78542843-78592136 | Protein_coding_from_Ensembl | 2.26091 | 6.35706 | 0.0008 |
| ENST00000566256 | ENSG00000140400 | MAN2C1 | 15:75648132-75748183 | Protein_coding_from_Ensembl | 6.51965 | 1.91104 | 0.01715 |
| ENST00000564428 | ENSG00000140464 | PML | 15:74287013-74340153 | Protein_coding_from_Ensembl | 0.834802 | 4.52746 | 5.00E-05 |
| ENST00000268124 | ENSG00000140521 | POLG | 15:89787179-89879406 | Protein_coding_from_Ensembl | 3.72164 | 1.49905 | 5.00E-05 |
| ENST00000569411 | ENSG00000140526 | ABHD2 | 15:89630308-89745591 | Protein_coding_from_Ensembl | 9.29085 | 4.1693 | 0.01505 |
| ENST00000557856 | ENSG00000140538 | NTRK3 | 15:88418229-88814297 | Protein_coding_from_Ensembl | 0.169396 | 0.844825 | 0.022 |
| ENST00000268151 | ENSG00000140545 | MFGE8 | 15:89441915-89456663 | Protein_coding_from_Ensembl | 4.98538 | 1.8378 | 0.0001 |
| ENST00000357742 | ENSG00000140563 | MCTP2 | 15:94774766-95023632 | Protein_coding_from_Ensembl | 1.20724 | 0.595496 | 0.0073 |
| ENST00000331706 | ENSG00000140563 | MCTP2 | 15:94774766-95023632 | Protein_coding_from_Ensembl | 0.292123 | 0.869425 | 0.03945 |
| ENST00000268184 | ENSG00000140577 | CRTC3 | 15:91073156-91260372 | Protein_coding_from_Ensembl | 2.85967 | 1.37151 | 0.00095 |
| ENST00000558134 | ENSG00000140612 | SEC11A | 15:84855503-85778026 | Protein_coding_from_Ensembl | 7.46684 | 1.84422 | 0.00205 |
| ENST00000436648 | ENSG00000140632 | GLYR1 | 16:4853203-4932361 | Protein_coding_from_Ensembl | 0.84083 | 1.9245 | 0.0012 |
| ENST00000562522 | ENSG00000140678 | ITGAX | 16:31366454-31394318 | Protein_coding_from_Ensembl | 2.47177 | 0.247195 | 5.00E-05 |
| ENST00000460382 | ENSG00000140718 | FTO | 16:53737874-54155853 | Protein_coding_from_Ensembl | 0.463335 | 4.56386 | 0.00135 |
| ENST00000308149 | ENSG00000140853 | NLRC5 | 16:57023396-57117443 | Protein_coding_from_Ensembl | 2.73773 | 5.93264 | 5.00E-05 |
| ENST00000465878 | ENSG00000140859 | KIFC3 | 16:57792128-57896957 | Protein_coding_from_Ensembl | 0.350377 | 1.21824 | 0.00215 |
| ENST00000424011 | ENSG00000140931 | CMTM3 | 16:66637776-66647795 | Protein_coding_from_Ensembl | 0.841693 | 0.271542 | 0.02585 |
| ENST00000361909 | ENSG00000140931 | CMTM3 | 16:66637776-66647795 | Protein_coding_from_Ensembl | 0.645606 | 1.30516 | 0.0308 |
| ENST00000564803 | ENSG00000140968 | IRF8 | 16:85932408-85956215 | Protein_coding_from_Ensembl | 1.42577 | 3.48141 | 0.0139 |
| ENST00000396852 | ENSG00000140987 | ZSCAN32 | 16:3415098-3627401 | Protein_coding_from_Ensembl | 0.464377 | 1.0489 | 0.01315 |
| ENST00000533186 | ENSG00000140988 | RPS2 | 16:2012052-2015617 | Protein_coding_from_Ensembl | 1.30992 | 16.053 | 0.0032 |
| ENST00000563795 | ENSG00000140995 | DEF8 | 16:90014332-90034468 | Protein_coding_from_Ensembl | 1.39767 | 0.24578 | 0.03325 |
| ENST00000268676 | ENSG00000140995 | DEF8 | 16:90014332-90034468 | Protein_coding_from_Ensembl | 1.75518 | 3.87063 | 5.00E-05 |
| ENST00000562256 | ENSG00000141002 | TCF25 | 16:89939999-90010296 | Protein_coding_from_Ensembl | 1.16705 | 0.39892 | 0.0311 |
| ENST00000582410 | ENSG00000141068 | KSR1 | 17:25783669-25977305 | Protein_coding_from_Ensembl | 0.520051 | 1.1102 | 0.02805 |
| ENST00000314423 | ENSG00000141076 | CIRH1A | 16:69139466-69442474 | Protein_coding_from_Ensembl | 1.71684 | 0.51291 | 0.00805 |
| ENST00000359042 | ENSG00000141219 | C17orf80 | 17:71161115-71258491 | Protein_coding_from_Ensembl | 0.77046 | 2.7248 | 5.00E-05 |
| ENST00000530173 | ENSG00000141279 | NPEPPS | 17:45600307-45762871 | Protein_coding_from_Ensembl | 1.48964 | 3.97849 | 5.00E-05 |
| ENST00000584123 | ENSG00000141295 | SCRN2 | 17:45908992-45918699 | Protein_coding_from_Ensembl | 1.60129 | 0.663123 | 0.0149 |
| ENST00000542420 | ENSG00000141380 | SS18 | 18:23596577-23671181 | Protein_coding_from_Ensembl | 1.40869 | 0.19777 | 0.00935 |
| ENST00000269137 | ENSG00000141380 | SS18 | 18:23596577-23671181 | Protein_coding_from_Ensembl | 1.9814 | 0.430993 | 0.0044 |
| ENST00000333234 | ENSG00000141428 | C18orf21 | 18:33552045-33559241 | Protein_coding_from_Ensembl | 3.33966 | 0.890916 | 0.01325 |
| ENST00000433935 | ENSG00000141497 | ZMYND15 | 17:4643318-4649411 | Protein_coding_from_Ensembl | 0.310589 | 1.06252 | 0.01745 |
| ENST00000269298 | ENSG00000141504 | SAT2 | 17:7465191-7536700 | Protein_coding_from_Ensembl | 1.98953 | 4.35104 | 0.03235 |
| ENST00000392467 | ENSG00000141524 | TMC6 | 17:76000248-76139049 | Protein_coding_from_Ensembl | 0.669398 | 1.37429 | 0.0171 |
| ENST00000314028 | ENSG00000141551 | CSNK1D | 17:80186272-80231607 | Protein_coding_from_Ensembl | 2.37136 | 0.589513 | 5.00E-05 |
| ENST00000398519 | ENSG00000141551 | CSNK1D | 17:80186272-80231607 | Protein_coding_from_Ensembl | 0.395216 | 2.09189 | 0.0079 |
| ENST00000571874 | ENSG00000141552 | ANAPC11 | 17:79845712-79869340 | Protein_coding_from_Ensembl | 3.05754 | 0.570618 | 0.04665 |
| ENST00000574924 | ENSG00000141552 | ANAPC11 | 17:79845712-79869340 | Protein_coding_from_Ensembl | 5.06078 | 2.19712 | 0.0144 |
| ENST00000571024 | ENSG00000141552 | ANAPC11 | 17:79845712-79869340 | Protein_coding_from_Ensembl | 1.65012 | 4.07478 | 0.03065 |
| ENST00000577128 | ENSG00000141560 | FN3KRP | 17:80674558-80692019 | Protein_coding_from_Ensembl | 1.44625 | 5.683 | 0.01925 |
| ENST00000345415 | ENSG00000141562 | NARF | 17:80412148-80448413 | Protein_coding_from_Ensembl | 2.01645 | 0.481593 | 0.0069 |
| ENST00000544334 | ENSG00000141564 | RPTOR | 17:78234664-79329659 | Protein_coding_from_Ensembl | 0.686995 | 2.07374 | 0.0003 |
| ENST00000450824 | ENSG00000141577 | AZI1 | 17:78234664-79329659 | Protein_coding_from_Ensembl | 2.15365 | 0.992928 | 0.0098 |
| ENST00000269392 | ENSG00000141577 | AZI1 | 17:78234664-79329659 | Protein_coding_from_Ensembl | 1.30325 | 2.68847 | 0.00445 |
| ENST00000584983 | ENSG00000141627 | DYM | 18:46521049-46987717 | Protein_coding_from_Ensembl | 0.900041 | 6.84499 | 0.0143 |
| ENST00000457839 | ENSG00000141644 | MBD1 | 18:47793251-47808144 | Protein_coding_from_Ensembl | 0.821756 | 1.69692 | 0.01035 |
| ENST00000588745 | ENSG00000141646 | SMAD4 | 18:48494360-48611415 | Protein_coding_from_Ensembl | 2.41759 | 5.13337 | 0.0017 |
| ENST00000543197 | ENSG00000141699 | FAM134C | 17:40731525-40767252 | Protein_coding_from_Ensembl | 0.534935 | 1.47855 | 0.0251 |
| ENST00000542955 | ENSG00000141753 | IGFBP4 | 17:38599701-38613983 | Protein_coding_from_Ensembl | 1.37602 | 3.55615 | 0.0303 |
| ENST00000585922 | ENSG00000141756 | FKBP10 | 17:39968931-39979465 | Protein_coding_from_Ensembl | 6.34839 | 13.9506 | 0.005 |
| ENST00000590282 | ENSG00000141905 | NFIC | 19:3359560-3469215 | Protein_coding_from_Ensembl | 2.19886 | 6.23514 | 5.00E-05 |
| ENST00000304076 | ENSG00000141968 | VAV1 | 19:6772724-6857377 | Protein_coding_from_Ensembl | 1.14344 | 0.140546 | 0.01945 |
| ENST00000539284 | ENSG00000141968 | VAV1 | 19:6772724-6857377 | Protein_coding_from_Ensembl | 1.07651 | 0.289809 | 0.0114 |
| ENST00000392002 | ENSG00000142046 | TMEM91 | 19:41768400-41930910 | Protein_coding_from_Ensembl | 1.23247 | 2.82141 | 0.0176 |
| ENST00000397763 | ENSG00000142173 | COL6A2 | 21:47518010-47552763 | Protein_coding_from_Ensembl | 4.12625 | 1.85265 | 0.0052 |
| ENST00000524944 | ENSG00000142186 | SCYL1 | 11:65292547-65306175 | Protein_coding_from_Ensembl | 0.517074 | 1.37085 | 0.00545 |
| ENST00000533862 | ENSG00000142186 | SCYL1 | 11:65292547-65306175 | Protein_coding_from_Ensembl | 0.470265 | 2.08832 | 0.0007 |
| ENST00000595838 | ENSG00000142303 | ADAMTS10 | 19:8645125-8675620 | Protein_coding_from_Ensembl | 3.42659 | 1.25428 | 5.00E-05 |
| ENST00000391984 | ENSG00000142330 | CAPN10 | 2:241526132-241570676 | Protein_coding_from_Ensembl | 3.31374 | 1.20916 | 5.00E-05 |
| ENST00000270617 | ENSG00000142528 | ZNF473 | 19:50479723-50570050 | Protein_coding_from_Ensembl | 0.41113 | 0.864545 | 0.00915 |
| ENST00000596873 | ENSG00000142534 | RPS11 | 19:49999621-50002946 | Protein_coding_from_Ensembl | 1.0386 | 8.16517 | 0.01815 |
| ENST00000598833 | ENSG00000142552 | RCN3 | 19:50030874-50050219 | Protein_coding_from_Ensembl | 2.21299 | 5.65034 | 0.02475 |
| ENST00000400907 | ENSG00000142599 | RERE | 1:8412456-8877702 | Protein_coding_from_Ensembl | 1.41131 | 3.14648 | 5.00E-05 |
| ENST00000444385 | ENSG00000142621 | FHAD1 | 1:15573767-15726779 | Protein_coding_from_Ensembl | 0.865434 | 0.407219 | 0.0168 |
| ENST00000458455 | ENSG00000142676 | RPL11 | 1:24018268-24022915 | Protein_coding_from_Ensembl | 5.49903 | 2.41527 | 0.0282 |
| ENST00000319394 | ENSG00000142784 | WDTC1 | 1:27561006-27635110 | Protein_coding_from_Ensembl | 1.9109 | 0.302345 | 5.00E-05 |
| ENST00000361771 | ENSG00000142784 | WDTC1 | 1:27561006-27635110 | Protein_coding_from_Ensembl | 2.25472 | 4.54931 | 5.00E-05 |
| ENST00000529450 | ENSG00000143036 | SLC44A3 | 1:95285897-95360802 | Protein_coding_from_Ensembl | 1.40555 | 0.301013 | 0.0056 |
| ENST00000369483 | ENSG00000143061 | IGSF3 | 1:117117030-117210375 | Protein_coding_from_Ensembl | 0.525305 | 1.07241 | 0.0009 |
| ENST00000369718 | ENSG00000143110 | C1orf162 | 1:112016413-112021134 | Protein_coding_from_Ensembl | 1.9295 | 4.92495 | 0.0053 |
| ENST00000538811 | ENSG00000143127 | ITGA10 | 1:143647637-149154987 | Protein_coding_from_Ensembl | 6.1575 | 0.262971 | 0.00885 |
| ENST00000539363 | ENSG00000143127 | ITGA10 | 1:143647637-149154987 | Protein_coding_from_Ensembl | 0.540466 | 5.3668 | 0.00055 |
| ENST00000367813 | ENSG00000143153 | ATP1B1 | 1:169074934-169337205 | Protein_coding_from_Ensembl | 2.28352 | 4.91273 | 0.0015 |
| ENST00000367840 | ENSG00000143164 | DCAF6 | 1:167885912-168045081 | Protein_coding_from_Ensembl | 2.17504 | 1.06825 | 0.0011 |
| ENST00000367666 | ENSG00000143207 | RFWD2 | 1:175913966-176176629 | Protein_coding_from_Ensembl | 3.60509 | 1.5583 | 0.001 |
| ENST00000498306 | ENSG00000143207 | RFWD2 | 1:175913966-176176629 | Protein_coding_from_Ensembl | 1.1921 | 4.05959 | 0.0386 |
| ENST00000368002 | ENSG00000143258 | USP21 | 1:161129239-161135513 | Protein_coding_from_Ensembl | 0.136578 | 1.2565 | 0.04215 |
| ENST00000344730 | ENSG00000143322 | ABL2 | 1:179068461-179198819 | Protein_coding_from_Ensembl | 0.555466 | 1.27192 | 0.0002 |
| ENST00000271583 | ENSG00000143337 | TOR1AIP1 | 1:179850741-179894135 | Protein_coding_from_Ensembl | 0.915182 | 0.283168 | 0.01065 |
| ENST00000304685 | ENSG00000143344 | RGL1 | 1:183605219-183897665 | Protein_coding_from_Ensembl | 0.33486 | 1.20517 | 0.00025 |
| ENST00000368879 | ENSG00000143373 | ZNF687 | 1:151252499-151300191 | Protein_coding_from_Ensembl | 3.09824 | 0.707724 | 5.00E-05 |
| ENST00000498193 | ENSG00000143379 | SETDB1 | 1:150898738-150948010 | Protein_coding_from_Ensembl | 1.50013 | 0.340321 | 0.0005 |
| ENST00000307940 | ENSG00000143384 | MCL1 | 1:150547031-150552066 | Protein_coding_from_Ensembl | 5.66668 | 1.72507 | 0.00245 |
| ENST00000368888 | ENSG00000143398 | PIP5K1A | 1:151169139-151222012 | Protein_coding_from_Ensembl | 1.36815 | 0.269983 | 0.012 |
| ENST00000424999 | ENSG00000143398 | PIP5K1A | 1:151169139-151222012 | Protein_coding_from_Ensembl | 3.88059 | 1.11305 | 0.0461 |
| ENST00000369119 | ENSG00000143401 | ANP32E | 1:150190716-150208504 | Protein_coding_from_Ensembl | 3.72408 | 1.48752 | 5.00E-05 |
| ENST00000426705 | ENSG00000143416 | SELENBP1 | 1:151336777-151345209 | Protein_coding_from_Ensembl | 1.49496 | 0.255166 | 0.0192 |
| ENST00000513281 | ENSG00000143420 | ENSA | 1:150552351-150602088 | Protein_coding_from_Ensembl | 1.87217 | 5.51161 | 0.0001 |
| ENST00000515192 | ENSG00000143437 | ARNT | 1:150782180-150849244 | Protein_coding_from_Ensembl | 0.851307 | 0.148198 | 0.01945 |
| ENST00000505755 | ENSG00000143437 | ARNT | 1:150782180-150849244 | Protein_coding_from_Ensembl | 1.16053 | 2.36828 | 0.0032 |
| ENST00000341822 | ENSG00000143515 | ATP8B2 | 1:154298028-154323783 | Protein_coding_from_Ensembl | 1.06958 | 2.29998 | 0.0074 |
| ENST00000328159 | ENSG00000143549 | TPM3 | 1:154127779-154167124 | Protein_coding_from_Ensembl | 1.33344 | 2.99965 | 0.0055 |
| ENST00000341485 | ENSG00000143549 | TPM3 | 1:154127779-154167124 | Protein_coding_from_Ensembl | 0.937505 | 6.56612 | 5.00E-05 |
| ENST00000537590 | ENSG00000143570 | SLC39A1 | 1:153931574-153950164 | Protein_coding_from_Ensembl | 0.687383 | 3.5536 | 0.00215 |
| ENST00000358505 | ENSG00000143603 | KCNN3 | 1:154669930-154842756 | Protein_coding_from_Ensembl | 0.747282 | 1.52522 | 0.04075 |
| ENST00000366543 | ENSG00000143702 | CEP170 | 1:243287729-243418650 | Protein_coding_from_Ensembl | 0.606065 | 1.30209 | 0.0002 |
| ENST00000469075 | ENSG00000143748 | NVL | 1:224407314-224518089 | Protein_coding_from_Ensembl | 0.899912 | 0.284183 | 0.02255 |
| ENST00000492281 | ENSG00000143748 | NVL | 1:224407314-224518089 | Protein_coding_from_Ensembl | 5.27623 | 1.5574 | 0.02025 |
| ENST00000425080 | ENSG00000143815 | LBR | 1:225589203-225616627 | Protein_coding_from_Ensembl | 0.943752 | 3.0436 | 0.01875 |
| ENST00000409328 | ENSG00000143889 | HNRNPLL | 2:38787214-38830728 | Protein_coding_from_Ensembl | 2.08297 | 4.83404 | 5.00E-05 |
| ENST00000398506 | ENSG00000143995 | MEIS1 | 2:66650474-66801001 | Protein_coding_from_Ensembl | 0.834564 | 0.20578 | 0.02 |
| ENST00000377254 | ENSG00000144115 | THNSL2 | 2:88469834-88486146 | Protein_coding_from_Ensembl | 0.19862 | 1.30231 | 0.02145 |
| ENST00000544369 | ENSG00000144230 | GPR17 | 2:128395955-128439360 | Protein_coding_from_Ensembl | 0.564928 | 1.30842 | 0.01025 |
| ENST00000359135 | ENSG00000144366 | GULP1 | 2:189156395-189460653 | Protein_coding_from_Ensembl | 1.7174 | 0.541524 | 0.00035 |
| ENST00000388968 | ENSG00000144381 | HSPD1 | 2:198351304-198418423 | Protein_coding_from_Ensembl | 3.6242 | 13.6756 | 5.00E-05 |
| ENST00000425132 | ENSG00000144401 | METTL21A | 2:208038357-208490652 | Protein_coding_from_Ensembl | 2.88976 | 1.02378 | 0.031 |
| ENST00000458426 | ENSG00000144401 | METTL21A | 2:208038357-208490652 | Protein_coding_from_Ensembl | 0.356217 | 1.27526 | 0.0442 |
| ENST00000272898 | ENSG00000144451 | SPAG16 | 2:214149102-215548970 | Protein_coding_from_Ensembl | 4.26656 | 1.72626 | 0.00725 |
| ENST00000534863 | ENSG00000144455 | SUMF1 | 3:3742497-4508965 | Protein_coding_from_Ensembl | 0.584365 | 2.37048 | 0.00605 |
| ENST00000423616 | ENSG00000144468 | RHBDD1 | 2:227700296-227863931 | Protein_coding_from_Ensembl | 8.97231 | 1.96697 | 0.00435 |
| ENST00000409401 | ENSG00000144535 | DIS3L2 | 2:232825954-233209060 | Protein_coding_from_Ensembl | 1.02909 | 2.19514 | 0.0069 |
| ENST00000373917 | ENSG00000144591 | GMPPA | 2:220299567-220403494 | Protein_coding_from_Ensembl | 0.894063 | 1.88207 | 0.02415 |
| ENST00000452462 | ENSG00000144642 | RBMS3 | 3:29305684-30051886 | Protein_coding_from_Ensembl | 6.02059 | 0.286271 | 0.0071 |
| ENST00000383767 | ENSG00000144642 | RBMS3 | 3:29305684-30051886 | Protein_coding_from_Ensembl | 2.47389 | 0.339232 | 0.00435 |
| ENST00000548360 | ENSG00000144785 | RP11-977G19.10 | 12:56665482-56727837 | Protein_coding_from_Ensembl | 12.3121 | 4.86383 | 0.0047 |
| ENST00000422132 | ENSG00000144815 | NXPE3 | 3:101498045-101579866 | Protein_coding_from_Ensembl | 0.317928 | 0.907303 | 5.00E-05 |
| ENST00000478922 | ENSG00000144824 | PHLDB2 | 3:111393522-111695364 | Protein_coding_from_Ensembl | 0.56664 | 1.94669 | 0.0055 |
| ENST00000483733 | ENSG00000144840 | RABL3 | 3:120405527-120501916 | Protein_coding_from_Ensembl | 1.74677 | 3.79832 | 0.0421 |
| ENST00000498710 | ENSG00000144857 | BOC | 3:112929849-113160457 | Protein_coding_from_Ensembl | 1.21735 | 4.21658 | 0.02995 |
| ENST00000312675 | ENSG00000145012 | LPP | 3:187868993-188608460 | Protein_coding_from_Ensembl | 0.0273584 | 2.02639 | 0.00705 |
| ENST00000443217 | ENSG00000145012 | LPP | 3:187868993-188608460 | Protein_coding_from_Ensembl | 5.77922 | 13.1959 | 0.041 |
| ENST00000381975 | ENSG00000145014 | TMEM44 | 3:194304727-194393206 | Protein_coding_from_Ensembl | 1.1756 | 0.586582 | 0.0386 |
| ENST00000449205 | ENSG00000145016 | KIAA0226 | 3:197398263-197514467 | Protein_coding_from_Ensembl | 1.37627 | 3.58141 | 0.00135 |
| ENST00000503837 | ENSG00000145147 | SLIT2 | 4:20254882-20622184 | Protein_coding_from_Ensembl | 1.47184 | 0.486904 | 0.0003 |
| ENST00000273814 | ENSG00000145214 | DGKQ | 4:952674-998316 | Protein_coding_from_Ensembl | 1.62237 | 0.581389 | 5.00E-05 |
| ENST00000498875 | ENSG00000145332 | KLHL8 | 4:88081254-88161466 | Protein_coding_from_Ensembl | 0.926025 | 0.355835 | 0.0013 |
| ENST00000506866 | ENSG00000145391 | SETD7 | 4:140417094-140527853 | Protein_coding_from_Ensembl | 2.96568 | 1.1162 | 0.0044 |
| ENST00000406354 | ENSG00000145391 | SETD7 | 4:140417094-140527853 | Protein_coding_from_Ensembl | 0.4937 | 3.11646 | 0.0134 |
| ENST00000537411 | ENSG00000145545 | SRD5A1 | 5:6633455-6669675 | Protein_coding_from_Ensembl | 0.296874 | 1.02795 | 0.03345 |
| ENST00000515007 | ENSG00000145685 | LHFPL2 | 5:77781037-78065844 | Protein_coding_from_Ensembl | 3.5163 | 1.45197 | 5.00E-05 |
| ENST00000515395 | ENSG00000145687 | SSBP2 | 5:80243515-81047616 | Protein_coding_from_Ensembl | 2.07941 | 0.790941 | 0.0241 |
| ENST00000514493 | ENSG00000145687 | SSBP2 | 5:80243515-81047616 | Protein_coding_from_Ensembl | 0.583448 | 1.36674 | 0.0428 |
| ENST00000378013 | ENSG00000145819 | ARHGAP26 | 5:142149948-142608576 | Protein_coding_from_Ensembl | 7.45123 | 3.48392 | 0.02325 |
| ENST00000514349 | ENSG00000145882 | PCYOX1L | 5:148737569-148749216 | Protein_coding_from_Ensembl | 0.339927 | 1.02543 | 0.00855 |
| ENST00000524280 | ENSG00000145901 | TNIP1 | 5:150409505-150473138 | Protein_coding_from_Ensembl | 8.91064 | 2.98251 | 5.00E-05 |
| ENST00000274599 | ENSG00000145908 | ZNF300 | 5:150226084-150284545 | Protein_coding_from_Ensembl | 0.934918 | 0.311594 | 0.007 |
| ENST00000313386 | ENSG00000145916 | RMND5B | 5:177557996-177580968 | Protein_coding_from_Ensembl | 3.5159 | 0.763189 | 0.0006 |
| ENST00000515098 | ENSG00000145916 | RMND5B | 5:177557996-177580968 | Protein_coding_from_Ensembl | 0.847435 | 1.85745 | 0.0002 |
| ENST00000324331 | ENSG00000145982 | FARS2 | 6:5261276-5771813 | Protein_coding_from_Ensembl | 1.50466 | 0.46308 | 0.02365 |
| ENST00000379284 | ENSG00000145990 | GFOD1 | 6:13358061-13487894 | Protein_coding_from_Ensembl | 1.16838 | 0.403355 | 5.00E-05 |
| ENST00000274773 | ENSG00000146054 | TRIM7 | 5:180617941-180632293 | Protein_coding_from_Ensembl | 0.846278 | 0.277968 | 0.0151 |
| ENST00000524677 | ENSG00000146067 | FAM193B | 5:176946788-176981542 | Protein_coding_from_Ensembl | 0.374863 | 1.75397 | 0.00645 |
| ENST00000329540 | ENSG00000146067 | FAM193B | 5:176946788-176981542 | Protein_coding_from_Ensembl | 0.383388 | 2.76972 | 5.00E-05 |
| ENST00000398904 | ENSG00000146122 | DAAM2 | 6:39760141-39902290 | Protein_coding_from_Ensembl | 0.0742633 | 1.02882 | 0.0048 |
| ENST00000368317 | ENSG00000146374 | RSPO3 | 6:126660934-127518910 | Protein_coding_from_Ensembl | 0.882985 | 1.97402 | 0.0356 |
| ENST00000407904 | ENSG00000146535 | GNA12 | 7:2719155-2883958 | Protein_coding_from_Ensembl | 3.79977 | 0.912722 | 5.00E-05 |
| ENST00000443006 | ENSG00000146701 | MDH2 | 7:75625655-75916605 | Protein_coding_from_Ensembl | 1.90165 | 0.357398 | 0.00425 |
| ENST00000538097 | ENSG00000146938 | NLGN4X | X:5758677-6146904 | Protein_coding_from_Ensembl | 0.843774 | 0.191595 | 0.0108 |
| ENST00000305127 | ENSG00000147118 | ZNF182 | X:47696300-47931025 | Protein_coding_from_Ensembl | 2.1825 | 0.586172 | 5.00E-05 |
| ENST00000360017 | ENSG00000147121 | KRBOX4 | X:46306291-46356857 | Protein_coding_from_Ensembl | 0.714722 | 2.12203 | 0.0004 |
| ENST00000373061 | ENSG00000147202 | DIAPH2 | X:95939661-96897588 | Protein_coding_from_Ensembl | 0.927898 | 0.426307 | 0.00435 |
| ENST00000543339 | ENSG00000147257 | GPC3 | X:132669772-133119922 | Protein_coding_from_Ensembl | 1.03583 | 2.48261 | 0.00725 |
| ENST00000522854 | ENSG00000147408 | CSGALNACT1 | 8:19261671-19615540 | Protein_coding_from_Ensembl | 3.7854 | 0.699063 | 5.00E-05 |
| ENST00000332246 | ENSG00000147408 | CSGALNACT1 | 8:19261671-19615540 | Protein_coding_from_Ensembl | 2.15244 | 1.07554 | 0.0003 |
| ENST00000454498 | ENSG00000147408 | CSGALNACT1 | 8:19261671-19615540 | Protein_coding_from_Ensembl | 0.496602 | 1.32391 | 0.00065 |
| ENST00000522915 | ENSG00000147419 | CCDC25 | 8:27555708-27695612 | Protein_coding_from_Ensembl | 6.51242 | 2.19724 | 0.00315 |
| ENST00000355231 | ENSG00000147421 | HMBOX1 | 8:28625174-28922453 | Protein_coding_from_Ensembl | 0.311859 | 1.08636 | 0.04305 |
| ENST00000523613 | ENSG00000147421 | HMBOX1 | 8:28625174-28922453 | Protein_coding_from_Ensembl | 0.529366 | 1.83747 | 0.0097 |
| ENST00000523358 | ENSG00000147471 | PROSC | 8:37620110-37637283 | Protein_coding_from_Ensembl | 8.14491 | 1.20808 | 0.0106 |
| ENST00000443286 | ENSG00000147526 | TACC1 | 8:38585703-38710546 | Protein_coding_from_Ensembl | 1.97907 | 0.959369 | 0.01385 |
| ENST00000520340 | ENSG00000147526 | TACC1 | 8:38585703-38710546 | Protein_coding_from_Ensembl | 0.839534 | 2.49446 | 0.0049 |
| ENST00000276520 | ENSG00000147526 | TACC1 | 8:38585703-38710546 | Protein_coding_from_Ensembl | 1.16671 | 2.67504 | 5.00E-05 |
| ENST00000396467 | ENSG00000147604 | RPL7 | 8:74202505-74282833 | Protein_coding_from_Ensembl | 0.840092 | 2.09793 | 0.03 |
| ENST00000276659 | ENSG00000147655 | RSPO2 | 8:108911543-109095913 | Protein_coding_from_Ensembl | 0.854828 | 0.256563 | 0.0164 |
| ENST00000518995 | ENSG00000147677 | EIF3H | 8:117654368-117889107 | Protein_coding_from_Ensembl | 0.818792 | 3.91674 | 0.03025 |
| ENST00000518949 | ENSG00000147677 | EIF3H | 8:117654368-117889107 | Protein_coding_from_Ensembl | 1.6954 | 4.48899 | 0.0158 |
| ENST00000380953 | ENSG00000147862 | NFIB | 9:14081841-14398982 | Protein_coding_from_Ensembl | 2.02201 | 0.787586 | 0.0038 |
| ENST00000477726 | ENSG00000147955 | SIGMAR1 | 9:34634718-34637806 | Protein_coding_from_Ensembl | 2.10872 | 0.606304 | 0.041 |
| ENST00000542028 | ENSG00000148143 | ZNF462 | 9:109625377-109865269 | Protein_coding_from_Ensembl | 0.39934 | 1.74774 | 0.00985 |
| ENST00000373823 | ENSG00000148180 | GSN | 9:123940414-124095121 | Protein_coding_from_Ensembl | 1.04734 | 0.207397 | 0.04 |
| ENST00000545652 | ENSG00000148180 | GSN | 9:123940414-124095121 | Protein_coding_from_Ensembl | 6.98783 | 3.32273 | 0.00085 |
| ENST00000277462 | ENSG00000148334 | PTGES2 | 9:130882971-130892913 | Protein_coding_from_Ensembl | 0.782758 | 2.20803 | 0.00765 |
| ENST00000372554 | ENSG00000148341 | SH3GLB2 | 9:131683173-131790582 | Protein_coding_from_Ensembl | 0.426493 | 2.38435 | 0.0022 |
| ENST00000290037 | ENSG00000148396 | SEC16A | 9:139334548-139372141 | Protein_coding_from_Ensembl | 1.27863 | 3.12724 | 5.00E-05 |
| ENST00000376215 | ENSG00000148459 | PDSS1 | 10:26986587-27150016 | Protein_coding_from_Ensembl | 0.623959 | 1.49197 | 0.027 |
| ENST00000418767 | ENSG00000148481 | FAM188A | 10:15820168-15902519 | Protein_coding_from_Ensembl | 3.05008 | 1.36912 | 0.02655 |
| ENST00000377602 | ENSG00000148488 | ST8SIA6 | 10:17360381-17496329 | Protein_coding_from_Ensembl | 0.681735 | 1.62408 | 0.0062 |
| ENST00000374776 | ENSG00000148498 | PARD3 | 10:34398487-35104253 | Protein_coding_from_Ensembl | 1.49759 | 0.122731 | 0.00255 |
| ENST00000374773 | ENSG00000148498 | PARD3 | 10:34398487-35104253 | Protein_coding_from_Ensembl | 0.147166 | 1.42487 | 0.0032 |
| ENST00000560721 | ENSG00000148516 | ZEB1 | 10:31476811-31818742 | Protein_coding_from_Ensembl | 1.38924 | 3.27235 | 5.00E-05 |
| ENST00000395198 | ENSG00000148634 | HERC4 | 10:69681664-69835105 | Protein_coding_from_Ensembl | 0.0617026 | 0.947444 | 0.03655 |
| ENST00000277817 | ENSG00000148634 | HERC4 | 10:69681664-69835105 | Protein_coding_from_Ensembl | 2.91829 | 1.32423 | 5.00E-05 |
| ENST00000373700 | ENSG00000148634 | HERC4 | 10:69681664-69835105 | Protein_coding_from_Ensembl | 7.21885 | 2.69968 | 5.00E-05 |
| ENST00000356080 | ENSG00000148700 | ADD3 | 10:111701028-111895323 | Protein_coding_from_Ensembl | 0.46852 | 1.59465 | 0.0026 |
| ENST00000369397 | ENSG00000148737 | TCF7L2 | 10:114710008-114927437 | Protein_coding_from_Ensembl | 2.09446 | 0.194415 | 0.00105 |
| ENST00000543371 | ENSG00000148737 | TCF7L2 | 10:114710008-114927437 | Protein_coding_from_Ensembl | 2.20583 | 0.944562 | 5.00E-05 |
| ENST00000525063 | ENSG00000148926 | ADM | 11:10315851-10328944 | Protein_coding_from_Ensembl | 1.06643 | 2.44882 | 0.0496 |
| ENST00000395574 | ENSG00000149091 | DGKZ | 11:46354454-46402104 | Protein_coding_from_Ensembl | 0.694586 | 1.54694 | 0.0025 |
| ENST00000532437 | ENSG00000149115 | TNKS1BP1 | 11:57067111-57092426 | Protein_coding_from_Ensembl | 0.427198 | 1.72636 | 5.00E-05 |
| ENST00000340687 | ENSG00000149131 | SERPING1 | 11:57364859-57382326 | Protein_coding_from_Ensembl | 8.24341 | 17.2028 | 5.00E-05 |
| ENST00000378615 | ENSG00000149179 | C11orf49 | 11:46958239-47198676 | Protein_coding_from_Ensembl | 1.58309 | 0.624967 | 0.0233 |
| ENST00000278460 | ENSG00000149179 | C11orf49 | 11:46958239-47198676 | Protein_coding_from_Ensembl | 1.58314 | 0.7831 | 0.04235 |
| ENST00000361904 | ENSG00000149187 | CELF1 | 11:47487495-47606114 | Protein_coding_from_Ensembl | 2.04552 | 0.870684 | 0.0238 |
| ENST00000531165 | ENSG00000149187 | CELF1 | 11:47487495-47606114 | Protein_coding_from_Ensembl | 1.02167 | 4.15781 | 5.00E-05 |
| ENST00000528203 | ENSG00000149269 | PAK1 | 11:77032751-77532063 | Protein_coding_from_Ensembl | 2.09522 | 0.590157 | 0.0044 |
| ENST00000453089 | ENSG00000149289 | ZC3H12C | 11:109964086-110042566 | Protein_coding_from_Ensembl | 1.61331 | 0.76338 | 5.00E-05 |
| ENST00000278590 | ENSG00000149289 | ZC3H12C | 11:109964086-110042566 | Protein_coding_from_Ensembl | 0.180054 | 1.32542 | 5.00E-05 |
| ENST00000314756 | ENSG00000149292 | TTC12 | 11:113185250-113254266 | Protein_coding_from_Ensembl | 1.44529 | 3.06223 | 0.0005 |
| ENST00000278616 | ENSG00000149311 | ATM | 11:108027941-108338258 | Protein_coding_from_Ensembl | 0.0279411 | 4.78951 | 0.01875 |
| ENST00000530473 | ENSG00000149428 | HYOU1 | 11:118914898-118927913 | Protein_coding_from_Ensembl | 0.181514 | 1.71816 | 0.0141 |
| ENST00000313236 | ENSG00000149582 | TMEM25 | 11:118307204-118473748 | Protein_coding_from_Ensembl | 0.383004 | 1.92463 | 0.00655 |
| ENST00000279034 | ENSG00000149639 | SOGA1 | 20:35405844-35492089 | Protein_coding_from_Ensembl | 1.71527 | 0.80696 | 0.0025 |
| ENST00000279281 | ENSG00000149823 | VPS51 | 11:64851694-64883856 | Protein_coding_from_Ensembl | 5.84122 | 2.47529 | 5.00E-05 |
| ENST00000350119 | ENSG00000149927 | DOC2A | 16:29262828-30366682 | Protein_coding_from_Ensembl | 1.81249 | 0.36444 | 0.02545 |
| ENST00000374956 | ENSG00000150093 | ITGB1 | 10:33189246-33405711 | Protein_coding_from_Ensembl | 0.42675 | 1.42926 | 0.0047 |
| ENST00000382754 | ENSG00000150456 | N6AMT2 | 13:21302869-21348817 | Protein_coding_from_Ensembl | 1.74341 | 4.393 | 0.0088 |
| ENST00000450573 | ENSG00000150459 | SAP18 | 13:21714652-21723221 | Protein_coding_from_Ensembl | 4.40451 | 9.76155 | 0.019 |
| ENST00000507625 | ENSG00000150471 | LPHN3 | 4:62066975-63031272 | Protein_coding_from_Ensembl | 0.404414 | 1.05642 | 0.0014 |
| ENST00000341749 | ENSG00000150527 | CTAGE5 | 14:39699434-39856306 | Protein_coding_from_Ensembl | 0.40994 | 1.61303 | 0.0009 |
| ENST00000358653 | ENSG00000150636 | CCDC102B | 18:66340924-66722426 | Protein_coding_from_Ensembl | 0.344076 | 1.94408 | 0.0191 |
| ENST00000584156 | ENSG00000150636 | CCDC102B | 18:66340924-66722426 | Protein_coding_from_Ensembl | 6.19459 | 2.84693 | 0.0002 |
| ENST00000376104 | ENSG00000150672 | DLG2 | 11:83166054-85338966 | Protein_coding_from_Ensembl | 0.325679 | 1.25722 | 5.00E-05 |
| ENST00000323883 | ENSG00000150867 | PIP4K2A | 10:22823777-23003484 | Protein_coding_from_Ensembl | 0.488786 | 2.0215 | 0.01075 |
| ENST00000354582 | ENSG00000150995 | ITPR1 | 3:4535031-4928977 | Protein_coding_from_Ensembl | 0.219403 | 0.841413 | 5.00E-05 |
| ENST00000416420 | ENSG00000151090 | THRB | 3:24158650-24541833 | Protein_coding_from_Ensembl | 0.282839 | 1.0773 | 0.01185 |
| ENST00000280701 | ENSG00000151093 | OXSM | 3:25760434-25836025 | Protein_coding_from_Ensembl | 0.450241 | 1.32827 | 0.0424 |
| ENST00000395411 | ENSG00000151292 | CSNK1G3 | 5:122847792-122952739 | Protein_coding_from_Ensembl | 2.45312 | 0.387624 | 5.00E-05 |
| ENST00000395412 | ENSG00000151292 | CSNK1G3 | 5:122847792-122952739 | Protein_coding_from_Ensembl | 0.790858 | 1.61441 | 0.0007 |
| ENST00000343631 | ENSG00000151348 | EXT2 | 11:44117098-44266979 | Protein_coding_from_Ensembl | 3.20526 | 0.595374 | 5.00E-05 |
| ENST00000536705 | ENSG00000151413 | NUBPL | 14:31959161-32330430 | Protein_coding_from_Ensembl | 1.53061 | 0.470237 | 0.00135 |
| ENST00000281081 | ENSG00000151413 | NUBPL | 14:31959161-32330430 | Protein_coding_from_Ensembl | 0.727156 | 1.46097 | 0.0089 |
| ENST00000538004 | ENSG00000151414 | NEK7 | 1:198126092-198291550 | Protein_coding_from_Ensembl | 8.26691 | 3.96696 | 0.00065 |
| ENST00000553888 | ENSG00000151445 | VIPAS39 | 14:77893017-77935817 | Protein_coding_from_Ensembl | 0.628379 | 1.51479 | 0.00245 |
| ENST00000264546 | ENSG00000151474 | FRMD4A | 10:13628926-14504141 | Protein_coding_from_Ensembl | 0.95383 | 2.94242 | 0.00045 |
| ENST00000421196 | ENSG00000151632 | AKR1C2 | 10:5029966-5060223 | Protein_coding_from_Ensembl | 0.936332 | 3.77121 | 0.0003 |
| ENST00000535925 | ENSG00000151657 | KIN | 10:7792924-7829990 | Protein_coding_from_Ensembl | 2.52986 | 0.84662 | 0.00455 |
| ENST00000281471 | ENSG00000151743 | AMN1 | 12:31800093-31882108 | Protein_coding_from_Ensembl | 0.77539 | 1.57329 | 0.0199 |
| ENST00000550207 | ENSG00000151746 | BICD1 | 12:32257050-32536567 | Protein_coding_from_Ensembl | 0.294233 | 1.80491 | 0.0184 |
| ENST00000551848 | ENSG00000151746 | BICD1 | 12:32257050-32536567 | Protein_coding_from_Ensembl | 3.91229 | 1.8887 | 0.0005 |
| ENST00000369236 | ENSG00000151892 | GFRA1 | 10:117816435-118032979 | Protein_coding_from_Ensembl | 0.825017 | 1.8216 | 0.0049 |
| ENST00000370754 | ENSG00000151914 | DST | 6:55921387-56819426 | Protein_coding_from_Ensembl | 3.01638 | 6.10063 | 5.00E-05 |
| ENST00000455239 | ENSG00000152082 | MZT2B | 2:130908964-130948302 | Protein_coding_from_Ensembl | 4.27226 | 0.3505 | 0.02575 |
| ENST00000282058 | ENSG00000152240 | HAUS1 | 18:43664109-43708299 | Protein_coding_from_Ensembl | 4.87698 | 2.39889 | 0.0078 |
| ENST00000392571 | ENSG00000152256 | PDK1 | 2:173292081-173494290 | Protein_coding_from_Ensembl | 1.55425 | 0.618105 | 0.0364 |
| ENST00000409015 | ENSG00000152291 | TGOLN2 | 2:85545146-85555548 | Protein_coding_from_Ensembl | 4.47854 | 1.38772 | 5.00E-05 |
| ENST00000428202 | ENSG00000152359 | POC5 | 5:74969948-75013313 | Protein_coding_from_Ensembl | 2.04643 | 0.0767929 | 0.04535 |
| ENST00000378242 | ENSG00000152457 | DCLRE1C | 10:14920818-14996431 | Protein_coding_from_Ensembl | 1.27949 | 0.596696 | 0.0341 |
| ENST00000514154 | ENSG00000152503 | TRIM36 | 5:114460458-114516243 | Protein_coding_from_Ensembl | 0.433197 | 1.06539 | 0.04265 |
| ENST00000492948 | ENSG00000152601 | MBNL1 | 3:151961616-152214800 | Protein_coding_from_Ensembl | 1.50653 | 7.34809 | 0.0008 |
| ENST00000439578 | ENSG00000152700 | SAR1B | 5:133936833-134063513 | Protein_coding_from_Ensembl | 5.362 | 1.72322 | 0.0024 |
| ENST00000595437 | ENSG00000152767 | FARP1 | 13:98794815-99102027 | Protein_coding_from_Ensembl | 0.896118 | 0.387968 | 0.0065 |
| ENST00000391855 | ENSG00000152904 | GGPS1 | 1:235294497-235507847 | Protein_coding_from_Ensembl | 3.23168 | 1.52592 | 0.00925 |
| ENST00000546323 | ENSG00000152944 | MED21 | 12:27175454-27219276 | Protein_coding_from_Ensembl | 1.67246 | 6.86984 | 0.0079 |
| ENST00000360060 | ENSG00000152952 | PLOD2 | 3:145781828-145881588 | Protein_coding_from_Ensembl | 2.21476 | 5.75225 | 5.00E-05 |
| ENST00000469350 | ENSG00000152952 | PLOD2 | 3:145781828-145881588 | Protein_coding_from_Ensembl | 1.24502 | 10.8493 | 0.00225 |
| ENST00000508653 | ENSG00000153064 | BANK1 | 4:102332442-102995969 | Protein_coding_from_Ensembl | 0.357708 | 0.922089 | 0.0476 |
| ENST00000339788 | ENSG00000153071 | DAB2 | 5:39284363-39462402 | Protein_coding_from_Ensembl | 1.14976 | 0.488346 | 0.00925 |
| ENST00000395812 | ENSG00000153113 | CAST | 5:95213691-96143803 | Protein_coding_from_Ensembl | 1.21124 | 0.143527 | 0.0054 |
| ENST00000395813 | ENSG00000153113 | CAST | 5:95213691-96143803 | Protein_coding_from_Ensembl | 4.81728 | 10.7167 | 5.00E-05 |
| ENST00000366508 | ENSG00000153207 | AHCTF1 | 1:247002399-247095280 | Protein_coding_from_Ensembl | 1.31142 | 0.655658 | 5.00E-05 |
| ENST00000295408 | ENSG00000153208 | MERTK | 2:112656055-112787138 | Protein_coding_from_Ensembl | 0.451182 | 1.12598 | 0.0047 |
| ENST00000392753 | ENSG00000153250 | RBMS1 | 2:161128661-161350305 | Protein_coding_from_Ensembl | 0.933854 | 2.2861 | 0.00925 |
| ENST00000428519 | ENSG00000153250 | RBMS1 | 2:161128661-161350305 | Protein_coding_from_Ensembl | 1.68043 | 5.20824 | 0.0215 |
| ENST00000574733 | ENSG00000153406 | NMRAL1 | 16:4511680-4560348 | Protein_coding_from_Ensembl | 0.717678 | 1.93322 | 0.00595 |
| ENST00000283474 | ENSG00000153443 | UBALD1 | 16:4658883-4665028 | Protein_coding_from_Ensembl | 0.283741 | 2.14738 | 0.0146 |
| ENST00000283628 | ENSG00000153560 | UBP1 | 3:33318516-33482863 | Protein_coding_from_Ensembl | 0.555594 | 1.90587 | 0.0042 |
| ENST00000558664 | ENSG00000153575 | TUBGCP5 | 15:22833394-22873892 | Protein_coding_from_Ensembl | 4.03526 | 8.14311 | 0.02745 |
| ENST00000354069 | ENSG00000153823 | PID1 | 2:229715241-230136001 | Protein_coding_from_Ensembl | 5.63991 | 2.3862 | 0.0069 |
| ENST00000422769 | ENSG00000154001 | PPP2R5E | 14:63838074-64010092 | Protein_coding_from_Ensembl | 2.5371 | 1.05359 | 0.00935 |
| ENST00000497395 | ENSG00000154175 | ABI3BP | 3:100467999-100712359 | Protein_coding_from_Ensembl | 7.80864 | 15.703 | 0.004 |
| ENST00000584471 | ENSG00000154217 | PITPNC1 | 17:65373574-65713798 | Protein_coding_from_Ensembl | 1.91561 | 4.12448 | 0.0395 |
| ENST00000537949 | ENSG00000154240 | CEP112 | 17:63524680-64188202 | Protein_coding_from_Ensembl | 4.17072 | 1.92896 | 5.00E-05 |
| ENST00000453985 | ENSG00000154258 | ABCA9 | 17:66970628-67057205 | Protein_coding_from_Ensembl | 1.26157 | 3.24592 | 5.00E-05 |
| ENST00000269081 | ENSG00000154263 | ABCA10 | 17:67143354-67323385 | Protein_coding_from_Ensembl | 1.3269 | 0.66299 | 0.0002 |
| ENST00000403422 | ENSG00000154328 | NEIL2 | 8:11627147-11644855 | Protein_coding_from_Ensembl | 2.00855 | 0.721441 | 0.00435 |
| ENST00000284503 | ENSG00000154328 | NEIL2 | 8:11627147-11644855 | Protein_coding_from_Ensembl | 0.456407 | 1.77636 | 0.0008 |
| ENST00000438278 | ENSG00000154556 | SORBS2 | 4:186506597-186877806 | Protein_coding_from_Ensembl | 4.5034 | 1.27694 | 0.0032 |
| ENST00000354828 | ENSG00000154727 | GABPA | 21:26931715-27589700 | Protein_coding_from_Ensembl | 1.59439 | 0.530019 | 0.0006 |
| ENST00000383775 | ENSG00000154813 | DPH3 | 3:16014886-16555533 | Protein_coding_from_Ensembl | 2.50773 | 1.21412 | 0.0016 |
| ENST00000488423 | ENSG00000154813 | DPH3 | 3:16014886-16555533 | Protein_coding_from_Ensembl | 1.33571 | 2.80639 | 0.0002 |
| ENST00000285106 | ENSG00000154832 | CXXC1 | 18:47808712-47814674 | Protein_coding_from_Ensembl | 1.42308 | 0.380416 | 0.00205 |
| ENST00000412036 | ENSG00000154832 | CXXC1 | 18:47808712-47814674 | Protein_coding_from_Ensembl | 0.312341 | 1.94175 | 0.0025 |
| ENST00000588072 | ENSG00000154889 | MPPE1 | 18:11688954-11909222 | Protein_coding_from_Ensembl | 0.965611 | 0.405392 | 0.00615 |
| ENST00000580306 | ENSG00000154957 | ZNF18 | 17:11501747-11900827 | Protein_coding_from_Ensembl | 2.7773 | 1.24844 | 0.00115 |
| ENST00000454073 | ENSG00000154957 | ZNF18 | 17:11501747-11900827 | Protein_coding_from_Ensembl | 1.63051 | 3.30318 | 0.00075 |
| ENST00000395884 | ENSG00000155090 | KLF10 | 8:103661002-103668130 | Protein_coding_from_Ensembl | 1.29374 | 0.304669 | 0.00085 |
| ENST00000327277 | ENSG00000155229 | MMS19 | 10:99218080-99258551 | Protein_coding_from_Ensembl | 0.810136 | 1.97462 | 0.00035 |
| ENST00000285605 | ENSG00000155254 | MARVELD1 | 10:99472929-99478181 | Protein_coding_from_Ensembl | 4.33723 | 1.45644 | 5.00E-05 |
| ENST00000453553 | ENSG00000155313 | USP25 | 21:17048708-17252377 | Protein_coding_from_Ensembl | 3.94145 | 1.1303 | 0.0391 |
| ENST00000413052 | ENSG00000155363 | MOV10 | 1:113009162-113243368 | Protein_coding_from_Ensembl | 2.16714 | 0.699457 | 5.00E-05 |
| ENST00000369645 | ENSG00000155363 | MOV10 | 1:113009162-113243368 | Protein_coding_from_Ensembl | 2.35839 | 1.05594 | 0.00035 |
| ENST00000369644 | ENSG00000155363 | MOV10 | 1:113009162-113243368 | Protein_coding_from_Ensembl | 0.372751 | 1.12273 | 0.0025 |
| ENST00000369637 | ENSG00000155366 | RHOC | 1:113243727-113258099 | Protein_coding_from_Ensembl | 11.999 | 3.83314 | 5.00E-05 |
| ENST00000369638 | ENSG00000155366 | RHOC | 1:113243727-113258099 | Protein_coding_from_Ensembl | 1.34254 | 4.16519 | 0.00445 |
| ENST00000555702 | ENSG00000155465 | SLC7A7 | 14:23242430-23299029 | Protein_coding_from_Ensembl | 0.387919 | 1.45283 | 0.0071 |
| ENST00000517876 | ENSG00000155508 | CNOT8 | 5:154198050-154256353 | Protein_coding_from_Ensembl | 0.501217 | 1.72292 | 0.00165 |
| ENST00000371110 | ENSG00000155629 | PIK3AP1 | 10:98353068-98480271 | Protein_coding_from_Ensembl | 3.02739 | 1.36775 | 0.0002 |
| ENST00000359878 | ENSG00000155729 | KCTD18 | 2:201353674-201448505 | Protein_coding_from_Ensembl | 3.73322 | 1.83257 | 5.00E-05 |
| ENST00000286195 | ENSG00000155754 | ALS2CR11 | 2:202352147-202483901 | Protein_coding_from_Ensembl | 0.348462 | 0.969924 | 0.0332 |
| ENST00000374819 | ENSG00000155827 | RNF20 | 9:104296132-104325622 | Protein_coding_from_Ensembl | 0.752052 | 5.78152 | 0.0497 |
| ENST00000455879 | ENSG00000155849 | ELMO1 | 7:36892510-37488852 | Protein_coding_from_Ensembl | 5.17259 | 13.6231 | 0.00035 |
| ENST00000521976 | ENSG00000155975 | VPS37A | 8:17086736-17271037 | Protein_coding_from_Ensembl | 1.50559 | 3.85025 | 0.03125 |
| ENST00000373053 | ENSG00000156026 | MCU | 10:74451888-74647452 | Protein_coding_from_Ensembl | 4.85583 | 1.96531 | 5.00E-05 |
| ENST00000536019 | ENSG00000156026 | MCU | 10:74451888-74647452 | Protein_coding_from_Ensembl | 1.0265 | 2.68829 | 5.00E-05 |
| ENST00000435371 | ENSG00000156030 | ELMSAN1 | 14:74181824-74270630 | Protein_coding_from_Ensembl | 0.983614 | 0.369931 | 0.0056 |
| ENST00000539909 | ENSG00000156110 | ADK | 10:75910959-76469061 | Protein_coding_from_Ensembl | 1.00035 | 5.61203 | 0.0001 |
| ENST00000480683 | ENSG00000156113 | KCNMA1 | 10:78629358-79398353 | Protein_coding_from_Ensembl | 2.32591 | 0.7319 | 0.02495 |
| ENST00000286627 | ENSG00000156113 | KCNMA1 | 10:78629358-79398353 | Protein_coding_from_Ensembl | 1.27923 | 2.71389 | 5.00E-05 |
| ENST00000567476 | ENSG00000156218 | ADAMTSL3 | 15:84322837-84708594 | Protein_coding_from_Ensembl | 1.00736 | 0.330463 | 5.00E-05 |
| ENST00000399921 | ENSG00000156273 | BACH1 | 21:30565800-31312351 | Protein_coding_from_Ensembl | 3.26095 | 1.33052 | 5.00E-05 |
| ENST00000434667 | ENSG00000156304 | SCAF4 | 21:33043345-33104388 | Protein_coding_from_Ensembl | 1.33962 | 0.370162 | 0.00075 |
| ENST00000286835 | ENSG00000156304 | SCAF4 | 21:33043345-33104388 | Protein_coding_from_Ensembl | 0.724995 | 2.31051 | 5.00E-05 |
| ENST00000369729 | ENSG00000156384 | SFR1 | 10:105881815-105886143 | Protein_coding_from_Ensembl | 1.21116 | 0.429219 | 0.0362 |
| ENST00000522822 | ENSG00000156469 | MTERFD1 | 8:97251625-97273838 | Protein_coding_from_Ensembl | 2.4245 | 1.10988 | 0.029 |
| ENST00000370790 | ENSG00000156504 | FAM122B | X:133903595-133988640 | Protein_coding_from_Ensembl | 1.60753 | 0.597122 | 0.00025 |
| ENST00000343004 | ENSG00000156504 | FAM122B | X:133903595-133988640 | Protein_coding_from_Ensembl | 0.33668 | 1.45297 | 0.00095 |
| ENST00000486347 | ENSG00000156504 | FAM122B | X:133903595-133988640 | Protein_coding_from_Ensembl | 0.670541 | 2.27954 | 0.0089 |
| ENST00000335494 | ENSG00000156521 | TYSND1 | 10:71897736-71906496 | Protein_coding_from_Ensembl | 0.458486 | 0.944863 | 0.0207 |
| ENST00000370803 | ENSG00000156531 | PHF6 | X:133507282-133562820 | Protein_coding_from_Ensembl | 0.308801 | 1.17038 | 0.0008 |
| ENST00000351217 | ENSG00000156642 | NPTN | 15:73735498-73926475 | Protein_coding_from_Ensembl | 1.7825 | 5.95543 | 5.00E-05 |
| ENST00000443022 | ENSG00000156804 | FBXO32 | 8:124510128-124553446 | Protein_coding_from_Ensembl | 3.40051 | 1.54973 | 0.01105 |
| ENST00000300835 | ENSG00000156858 | PRR14 | 16:30662037-30667761 | Protein_coding_from_Ensembl | 0.507672 | 1.50462 | 0.0062 |
| ENST00000560031 | ENSG00000156958 | GALK2 | 15:49398267-49913128 | Protein_coding_from_Ensembl | 0.929167 | 2.32602 | 0.00465 |
| ENST00000457855 | ENSG00000156983 | BRPF1 | 3:9773412-9789702 | Protein_coding_from_Ensembl | 1.25911 | 0.383548 | 0.0006 |
| ENST00000294868 | ENSG00000157064 | NMNAT2 | 1:183217371-183387737 | Protein_coding_from_Ensembl | 0.254165 | 0.866026 | 0.00065 |
| ENST00000320203 | ENSG00000157110 | RBPMS | 8:30239634-30432397 | Protein_coding_from_Ensembl | 0.465719 | 1.58044 | 0.0005 |
| ENST00000419367 | ENSG00000157181 | C1orf27 | 1:186344889-186390510 | Protein_coding_from_Ensembl | 0.366704 | 1.26755 | 0.01315 |
| ENST00000354412 | ENSG00000157193 | LRP8 | 1:53711216-53793742 | Protein_coding_from_Ensembl | 0.801069 | 0.147267 | 0.0302 |
| ENST00000288040 | ENSG00000157322 | CLEC18A | 16:69984809-69998141 | Protein_coding_from_Ensembl | 0.264325 | 1.03042 | 0.0242 |
| ENST00000205214 | ENSG00000157426 | AASDH | 4:57204455-57301781 | Protein_coding_from_Ensembl | 2.10196 | 0.107304 | 0.01415 |
| ENST00000513376 | ENSG00000157426 | AASDH | 4:57204455-57301781 | Protein_coding_from_Ensembl | 0.38906 | 2.39059 | 5.00E-05 |
| ENST00000348370 | ENSG00000157450 | RNF111 | 15:59063390-59394178 | Protein_coding_from_Ensembl | 1.20437 | 0.182872 | 0.00055 |
| ENST00000434298 | ENSG00000157450 | RNF111 | 15:59063390-59394178 | Protein_coding_from_Ensembl | 0.239316 | 1.76331 | 5.00E-05 |
| ENST00000398905 | ENSG00000157554 | ERG | 21:39751948-40033704 | Protein_coding_from_Ensembl | 1.24304 | 2.99214 | 5.00E-05 |
| ENST00000533080 | ENSG00000157570 | TSPAN18 | 11:44740941-44972840 | Protein_coding_from_Ensembl | 2.93639 | 1.07225 | 0.0383 |
| ENST00000372072 | ENSG00000157600 | TMEM164 | X:109245858-109425962 | Protein_coding_from_Ensembl | 1.73612 | 0.537756 | 5.00E-05 |
| ENST00000372068 | ENSG00000157600 | TMEM164 | X:109245858-109425962 | Protein_coding_from_Ensembl | 1.25162 | 2.73301 | 5.00E-05 |
| ENST00000399820 | ENSG00000157796 | WDR19 | 4:39184023-39287430 | Protein_coding_from_Ensembl | 3.21738 | 1.01623 | 5.00E-05 |
| ENST00000288634 | ENSG00000157796 | WDR19 | 4:39184023-39287430 | Protein_coding_from_Ensembl | 1.2299 | 3.31076 | 5.00E-05 |
| ENST00000336418 | ENSG00000157823 | AP3S2 | 15:90373830-90456188 | Protein_coding_from_Ensembl | 1.37635 | 0.119452 | 0.00025 |
| ENST00000409699 | ENSG00000157890 | MEGF11 | 15:66187416-66546085 | Protein_coding_from_Ensembl | 1.09737 | 0.525846 | 0.00105 |
| ENST00000288757 | ENSG00000157895 | C12orf43 | 12:121386327-121454305 | Protein_coding_from_Ensembl | 0.820679 | 0.233078 | 0.0354 |
| ENST00000445832 | ENSG00000157895 | C12orf43 | 12:121386327-121454305 | Protein_coding_from_Ensembl | 0.674482 | 3.03793 | 5.00E-05 |
| ENST00000361704 | ENSG00000158019 | BRE | 2:27994583-28561768 | Protein_coding_from_Ensembl | 0.156614 | 2.921 | 0.01565 |
| ENST00000481752 | ENSG00000158092 | NCK1 | 3:136581049-136729927 | Protein_coding_from_Ensembl | 1.35833 | 4.92786 | 5.00E-05 |
| ENST00000411939 | ENSG00000158122 | AAED1 | 9:99401858-99417585 | Protein_coding_from_Ensembl | 1.23497 | 0.330647 | 0.0094 |
| ENST00000540618 | ENSG00000158161 | EYA3 | 1:28296854-28415207 | Protein_coding_from_Ensembl | 0.918393 | 1.85081 | 0.0191 |
| ENST00000423968 | ENSG00000158186 | MRAS | 3:138066538-138124375 | Protein_coding_from_Ensembl | 3.42939 | 1.2248 | 0.0004 |
| ENST00000536657 | ENSG00000158195 | WASF2 | 1:27730729-27816669 | Protein_coding_from_Ensembl | 6.79252 | 13.6229 | 0.00015 |
| ENST00000360570 | ENSG00000158234 | FAIM | 3:138327447-138352218 | Protein_coding_from_Ensembl | 0.505412 | 1.68929 | 0.029 |
| ENST00000472148 | ENSG00000158296 | SLC13A3 | 20:45186462-45304714 | Protein_coding_from_Ensembl | 0.427404 | 0.968182 | 0.0176 |
| ENST00000409097 | ENSG00000158552 | ZFAND2B | 2:220059958-220074373 | Protein_coding_from_Ensembl | 1.87936 | 0.557946 | 0.0055 |
| ENST00000396198 | ENSG00000158578 | ALAS2 | X:55026789-55057497 | Protein_coding_from_Ensembl | 0.403721 | 1.79451 | 0.003 |
| ENST00000368096 | ENSG00000158710 | TAGLN2 | 1:159887896-159895522 | Protein_coding_from_Ensembl | 2.7671 | 1.31325 | 0.01025 |
| ENST00000368006 | ENSG00000158796 | DEDD | 1:161070345-161102478 | Protein_coding_from_Ensembl | 5.93516 | 2.42924 | 5.00E-05 |
| ENST00000458050 | ENSG00000158796 | DEDD | 1:161070345-161102478 | Protein_coding_from_Ensembl | 0.464692 | 4.01464 | 0.0003 |
| ENST00000568064 | ENSG00000158805 | ZNF276 | 16:89773541-89883065 | Protein_coding_from_Ensembl | 0.957742 | 0.132152 | 0.03315 |
| ENST00000517600 | ENSG00000158856 | DMTN | 8:21906505-21940038 | Protein_coding_from_Ensembl | 1.30359 | 0.483873 | 0.0381 |
| ENST00000265800 | ENSG00000158856 | DMTN | 8:21906505-21940038 | Protein_coding_from_Ensembl | 0.415189 | 0.910239 | 0.0401 |
| ENST00000289921 | ENSG00000158863 | FAM160B2 | 8:21946669-21962409 | Protein_coding_from_Ensembl | 3.00892 | 1.34813 | 5.00E-05 |
| ENST00000367987 | ENSG00000158882 | TOMM40L | 1:161195792-161208092 | Protein_coding_from_Ensembl | 2.30478 | 1.03102 | 0.00125 |
| ENST00000523349 | ENSG00000158941 | CCAR2 | 8:22462144-22526661 | Protein_coding_from_Ensembl | 1.66643 | 5.14392 | 0.0272 |
| ENST00000308008 | ENSG00000158987 | RAPGEF6 | 5:130759613-131132710 | Protein_coding_from_Ensembl | 1.60718 | 0.672507 | 0.00075 |
| ENST00000510071 | ENSG00000158987 | RAPGEF6 | 5:130759613-131132710 | Protein_coding_from_Ensembl | 0.822275 | 1.6843 | 0.00515 |
| ENST00000376156 | ENSG00000159063 | ALG8 | 11:77726760-77850706 | Protein_coding_from_Ensembl | 0.941974 | 1.90387 | 0.0255 |
| ENST00000530910 | ENSG00000159063 | ALG8 | 11:77726760-77850706 | Protein_coding_from_Ensembl | 1.75155 | 3.98253 | 0.01605 |
| ENST00000382549 | ENSG00000159079 | C21orf59 | 21:33948861-33985176 | Protein_coding_from_Ensembl | 0.487108 | 1.94485 | 0.00195 |
| ENST00000290155 | ENSG00000159079 | C21orf59 | 21:33948861-33985176 | Protein_coding_from_Ensembl | 1.80794 | 4.1021 | 0.0005 |
| ENST00000290178 | ENSG00000159086 | PAXBP1 | 21:34100416-34144169 | Protein_coding_from_Ensembl | 1.45304 | 2.95804 | 0.0008 |
| ENST00000381995 | ENSG00000159128 | IFNGR2 | 21:34757299-34852318 | Protein_coding_from_Ensembl | 2.14763 | 7.63948 | 5.00E-05 |
| ENST00000361093 | ENSG00000159131 | GART | 21:34876237-35351160 | Protein_coding_from_Ensembl | 1.86319 | 0.81091 | 0.0314 |
| ENST00000374637 | ENSG00000159189 | C1QC | 1:22970122-22974603 | Protein_coding_from_Ensembl | 0.936338 | 3.40384 | 0.0049 |
| ENST00000290460 | ENSG00000159307 | SCUBE1 | 22:43593288-43739394 | Protein_coding_from_Ensembl | 0.743703 | 1.92416 | 0.00335 |
| ENST00000532038 | ENSG00000159314 | ARHGAP27 | 17:43471274-43511787 | Protein_coding_from_Ensembl | 0.664484 | 1.65034 | 0.001 |
| ENST00000376922 | ENSG00000159314 | ARHGAP27 | 17:43471274-43511787 | Protein_coding_from_Ensembl | 4.87975 | 2.28435 | 5.00E-05 |
| ENST00000389462 | ENSG00000159335 | PTMS | 12:6857157-6880116 | Protein_coding_from_Ensembl | 2.07621 | 4.62001 | 0.02635 |
| ENST00000375341 | ENSG00000159423 | ALDH4A1 | 1:19166092-19283180 | Protein_coding_from_Ensembl | 0.662927 | 1.48148 | 0.00375 |
| ENST00000492830 | ENSG00000159461 | AMFR | 16:56395363-56459450 | Protein_coding_from_Ensembl | 0.602808 | 1.74186 | 0.0045 |
| ENST00000431380 | ENSG00000159674 | SPON2 | 4:1160719-1202750 | Protein_coding_from_Ensembl | 2.16756 | 8.69348 | 5.00E-05 |
| ENST00000290921 | ENSG00000159692 | CTBP1 | 4:1203907-1282079 | Protein_coding_from_Ensembl | 5.54009 | 2.65073 | 5.00E-05 |
| ENST00000338806 | ENSG00000159788 | RGS12 | 4:3294754-3441640 | Protein_coding_from_Ensembl | 0.436443 | 1.03876 | 0.01425 |
| ENST00000421267 | ENSG00000159899 | NPR2 | 9:35792150-35812269 | Protein_coding_from_Ensembl | 0.37802 | 2.29469 | 0.02835 |
| ENST00000308647 | ENSG00000160072 | ATAD3B | 1:1407142-1433228 | Protein_coding_from_Ensembl | 0.999668 | 2.05153 | 0.0064 |
| ENST00000539719 | ENSG00000160094 | ZNF362 | 1:33722145-33766320 | Protein_coding_from_Ensembl | 1.30545 | 0.472052 | 0.00325 |
| ENST00000479414 | ENSG00000160124 | CCDC58 | 3:122078437-122102078 | Protein_coding_from_Ensembl | 2.58181 | 6.70523 | 0.04035 |
| ENST00000240874 | ENSG00000160145 | KALRN | 3:123752541-124445172 | Protein_coding_from_Ensembl | 0.58875 | 1.36747 | 5.00E-05 |
| ENST00000361802 | ENSG00000160179 | ABCG1 | 21:43619798-43717354 | Protein_coding_from_Ensembl | 1.00751 | 2.96045 | 0.0002 |
| ENST00000291539 | ENSG00000160191 | PDE9A | 21:44073745-44195619 | Protein_coding_from_Ensembl | 2.17029 | 0.412924 | 0.003 |
| ENST00000398208 | ENSG00000160193 | WDR4 | 21:44263203-44299678 | Protein_coding_from_Ensembl | 1.9008 | 0.419086 | 0.0017 |
| ENST00000327574 | ENSG00000160209 | PDXK | 21:45138974-45182188 | Protein_coding_from_Ensembl | 1.75908 | 0.798207 | 0.0052 |
| ENST00000348499 | ENSG00000160221 | C21orf33 | 21:45553486-45565605 | Protein_coding_from_Ensembl | 0.96719 | 2.97741 | 0.00195 |
| ENST00000400377 | ENSG00000160223 | ICOSLG | 21:45642873-45660849 | Protein_coding_from_Ensembl | 1.09093 | 0.164849 | 0.0132 |
| ENST00000397852 | ENSG00000160255 | ITGB2 | 21:46305867-46351904 | Protein_coding_from_Ensembl | 0.130379 | 1.32189 | 0.01685 |
| ENST00000371851 | ENSG00000160293 | VAV2 | 9:136627015-136857726 | Protein_coding_from_Ensembl | 0.647694 | 1.91099 | 5.00E-05 |
| ENST00000435722 | ENSG00000160305 | DIP2A | 21:47878811-47989926 | Protein_coding_from_Ensembl | 3.73283 | 0.133295 | 0.0121 |
| ENST00000318711 | ENSG00000160305 | DIP2A | 21:47878811-47989926 | Protein_coding_from_Ensembl | 2.11464 | 0.971625 | 5.00E-05 |
| ENST00000457905 | ENSG00000160305 | DIP2A | 21:47878811-47989926 | Protein_coding_from_Ensembl | 1.3988 | 3.76607 | 5.00E-05 |
| ENST00000291705 | ENSG00000160310 | PRMT2 | 21:48055078-48085036 | Protein_coding_from_Ensembl | 0.396259 | 1.76001 | 0.0214 |
| ENST00000373146 | ENSG00000160408 | ST6GALNAC6 | 9:130628758-130667687 | Protein_coding_from_Ensembl | 2.48701 | 7.08458 | 5.00E-05 |
| ENST00000414921 | ENSG00000160445 | ZER1 | 9:131486723-131534693 | Protein_coding_from_Ensembl | 0.598946 | 2.24548 | 0.0455 |
| ENST00000336034 | ENSG00000160570 | DEDD2 | 19:42702749-42724292 | Protein_coding_from_Ensembl | 1.77141 | 0.823261 | 0.02075 |
| ENST00000375288 | ENSG00000160584 | SIK3 | 11:116706466-116969153 | Protein_coding_from_Ensembl | 0.444914 | 1.27241 | 5.00E-05 |
| ENST00000292067 | ENSG00000160593 | AMICA1 | 11:118064441-118095809 | Protein_coding_from_Ensembl | 0.759273 | 1.97832 | 0.0036 |
| ENST00000368687 | ENSG00000160679 | CHTOP | 1:153591262-153618782 | Protein_coding_from_Ensembl | 2.57978 | 5.23925 | 0.008 |
| ENST00000368426 | ENSG00000160685 | ZBTB7B | 1:154975105-155006257 | Protein_coding_from_Ensembl | 4.53768 | 0.275032 | 5.00E-05 |
| ENST00000292176 | ENSG00000160685 | ZBTB7B | 1:154975105-155006257 | Protein_coding_from_Ensembl | 0.653283 | 1.36058 | 0.0273 |
| ENST00000315144 | ENSG00000160688 | FLAD1 | 1:154955813-154965587 | Protein_coding_from_Ensembl | 1.16408 | 2.4852 | 0.00955 |
| ENST00000368445 | ENSG00000160691 | SHC1 | 1:154929501-154946871 | Protein_coding_from_Ensembl | 8.79035 | 2.12204 | 5.00E-05 |
| ENST00000409109 | ENSG00000160703 | NLRX1 | 11:119037276-119054725 | Protein_coding_from_Ensembl | 0.741058 | 1.60055 | 0.00115 |
| ENST00000368471 | ENSG00000160710 | ADAR | 1:154554537-154600475 | Protein_coding_from_Ensembl | 2.96067 | 8.69731 | 5.00E-05 |
| ENST00000418619 | ENSG00000160801 | PTH1R | 3:46899361-46945287 | Protein_coding_from_Ensembl | 10.5152 | 3.90714 | 5.00E-05 |
| ENST00000292476 | ENSG00000160917 | CPSF4 | 7:98923520-99063954 | Protein_coding_from_Ensembl | 0.81696 | 2.79541 | 0.0024 |
| ENST00000527730 | ENSG00000160959 | LRRC14 | 8:145743375-145754516 | Protein_coding_from_Ensembl | 0.612363 | 1.78057 | 0.0468 |
| ENST00000495936 | ENSG00000160991 | ORAI2 | 7:102067264-102105323 | Protein_coding_from_Ensembl | 4.28467 | 1.08026 | 0.0043 |
| ENST00000518778 | ENSG00000161013 | MGAT4B | 5:179224596-179334859 | Protein_coding_from_Ensembl | 2.43589 | 1.04404 | 0.0295 |
| ENST00000355423 | ENSG00000161526 | SAP30BP | 17:73584138-73704142 | Protein_coding_from_Ensembl | 2.11065 | 4.77683 | 0.00015 |
| ENST00000451628 | ENSG00000161551 | ZNF577 | 19:52359054-52408293 | Protein_coding_from_Ensembl | 1.42287 | 0.691039 | 0.045 |
| ENST00000420592 | ENSG00000161551 | ZNF577 | 19:52359054-52408293 | Protein_coding_from_Ensembl | 0.498474 | 1.74293 | 0.0005 |
| ENST00000293275 | ENSG00000161573 | CCL16 | 17:34303528-34308532 | Protein_coding_from_Ensembl | 0.268536 | 1.3309 | 0.0467 |
| ENST00000518444 | ENSG00000161813 | LARP4 | 12:50720012-50873787 | Protein_coding_from_Ensembl | 1.80783 | 0.841399 | 0.0036 |
| ENST00000293829 | ENSG00000161958 | FGF11 | 17:7323421-7361026 | Protein_coding_from_Ensembl | 0.265147 | 1.11383 | 0.0055 |
| ENST00000549091 | ENSG00000161996 | WDR90 | 16:699310-717833 | Protein_coding_from_Ensembl | 0.91328 | 0.33189 | 0.0015 |
| ENST00000566339 | ENSG00000162032 | SPSB3 | 16:1823207-1844972 | Protein_coding_from_Ensembl | 1.12825 | 3.00391 | 0.00105 |
| ENST00000301717 | ENSG00000162032 | SPSB3 | 16:1823207-1844972 | Protein_coding_from_Ensembl | 6.31852 | 3.05035 | 0.0001 |
| ENST00000572687 | ENSG00000162073 | PAQR4 | 16:3013944-3030540 | Protein_coding_from_Ensembl | 0.962143 | 0.396602 | 0.0337 |
| ENST00000544263 | ENSG00000162139 | NEU3 | 11:74699178-74729938 | Protein_coding_from_Ensembl | 0.532481 | 1.22658 | 0.02825 |
| ENST00000294072 | ENSG00000162144 | CYB561A3 | 11:61066922-61136981 | Protein_coding_from_Ensembl | 2.74975 | 1.31411 | 0.0007 |
| ENST00000532583 | ENSG00000162222 | TTC9C | 11:62495540-62507765 | Protein_coding_from_Ensembl | 3.05865 | 0.694576 | 0.02505 |
| ENST00000294187 | ENSG00000162241 | SLC25A45 | 11:65134908-65151172 | Protein_coding_from_Ensembl | 0.365055 | 1.10592 | 0.0178 |
| ENST00000294256 | ENSG00000162298 | SYVN1 | 11:64888099-64902004 | Protein_coding_from_Ensembl | 3.51242 | 1.49716 | 5.00E-05 |
| ENST00000528057 | ENSG00000162302 | RPS6KA4 | 11:64126619-64139687 | Protein_coding_from_Ensembl | 0.42227 | 1.12674 | 0.00635 |
| ENST00000441801 | ENSG00000162458 | FBLIM1 | 1:16083101-16113089 | Protein_coding_from_Ensembl | 2.41238 | 0.954405 | 0.00875 |
| ENST00000294489 | ENSG00000162493 | PDPN | 1:13909959-13944452 | Protein_coding_from_Ensembl | 1.24528 | 0.569362 | 0.01145 |
| ENST00000540617 | ENSG00000162551 | ALPL | 1:21835857-21904905 | Protein_coding_from_Ensembl | 5.75233 | 0.74648 | 5.00E-05 |
| ENST00000539907 | ENSG00000162551 | ALPL | 1:21835857-21904905 | Protein_coding_from_Ensembl | 0.84273 | 1.83715 | 0.01335 |
| ENST00000374832 | ENSG00000162551 | ALPL | 1:21835857-21904905 | Protein_coding_from_Ensembl | 4.37344 | 1.8689 | 0.00035 |
| ENST00000401035 | ENSG00000162614 | NEXN | 1:78347032-78409580 | Protein_coding_from_Ensembl | 2.97918 | 0.642774 | 0.00585 |
| ENST00000370032 | ENSG00000162639 | HENMT1 | 1:109190911-109209159 | Protein_coding_from_Ensembl | 2.63887 | 0.601513 | 0.0014 |
| ENST00000402983 | ENSG00000162639 | HENMT1 | 1:109190911-109209159 | Protein_coding_from_Ensembl | 0.327774 | 1.81256 | 0.01015 |
| ENST00000367353 | ENSG00000162702 | ZNF281 | 1:200374067-200379184 | Protein_coding_from_Ensembl | 0.113925 | 0.885979 | 0.013 |
| ENST00000336119 | ENSG00000162711 | NLRP3 | 1:247579457-247612410 | Protein_coding_from_Ensembl | 0.911975 | 2.6701 | 5.00E-05 |
| ENST00000368076 | ENSG00000162734 | PEA15 | 1:160171988-160185166 | Protein_coding_from_Ensembl | 0.56465 | 1.41964 | 0.0058 |
| ENST00000392212 | ENSG00000162736 | NCSTN | 1:160259062-160328742 | Protein_coding_from_Ensembl | 11.6139 | 3.54714 | 5.00E-05 |
| ENST00000294785 | ENSG00000162736 | NCSTN | 1:160259062-160328742 | Protein_coding_from_Ensembl | 0.124498 | 7.97852 | 0.0188 |
| ENST00000368057 | ENSG00000162739 | SLAMF6 | 1:160454819-160493052 | Protein_coding_from_Ensembl | 0.400434 | 1.48456 | 0.00295 |
| ENST00000341491 | ENSG00000162772 | ATF3 | 1:212738675-212794119 | Protein_coding_from_Ensembl | 1.31816 | 0.446237 | 0.01625 |
| ENST00000401644 | ENSG00000162804 | SNED1 | 2:241938254-242041747 | Protein_coding_from_Ensembl | 1.34076 | 6.02217 | 0.00255 |
| ENST00000539697 | ENSG00000162819 | BROX | 1:222791427-222946483 | Protein_coding_from_Ensembl | 3.47327 | 7.32117 | 0.0001 |
| ENST00000366511 | ENSG00000162852 | CNST | 1:246729745-246831886 | Protein_coding_from_Ensembl | 8.92581 | 3.29617 | 0.00245 |
| ENST00000411464 | ENSG00000162910 | MRPL55 | 1:228294379-228297013 | Protein_coding_from_Ensembl | 0.471418 | 1.88894 | 0.0203 |
| ENST00000366633 | ENSG00000162946 | DISC1 | 1:231664398-232177019 | Protein_coding_from_Ensembl | 0.400804 | 1.28442 | 0.0053 |
| ENST00000404530 | ENSG00000162959 | MEMO1 | 2:32070220-32264881 | Protein_coding_from_Ensembl | 0.992382 | 3.64018 | 0.0003 |
| ENST00000441908 | ENSG00000162976 | PQLC3 | 2:11295323-11319000 | Protein_coding_from_Ensembl | 2.16307 | 0.667292 | 0.0263 |
| ENST00000446852 | ENSG00000163029 | SMC6 | 2:17845078-17981509 | Protein_coding_from_Ensembl | 1.18078 | 0.175668 | 0.00965 |
| ENST00000366813 | ENSG00000163041 | H3F3A | 1:226234115-226259703 | Protein_coding_from_Ensembl | 1.44636 | 0.57 | 0.04765 |
| ENST00000397206 | ENSG00000163072 | NOSTRIN | 2:169312371-169769881 | Protein_coding_from_Ensembl | 1.86912 | 4.16294 | 0.00155 |
| ENST00000429690 | ENSG00000163145 | C1QTNF7 | 4:15004297-15447790 | Protein_coding_from_Ensembl | 2.41467 | 1.12833 | 5.00E-05 |
| ENST00000397700 | ENSG00000163145 | C1QTNF7 | 4:15004297-15447790 | Protein_coding_from_Ensembl | 2.55154 | 10.343 | 0.0014 |
| ENST00000409202 | ENSG00000163219 | ARHGAP25 | 2:68906732-69053965 | Protein_coding_from_Ensembl | 0.508949 | 3.9997 | 5.00E-05 |
| ENST00000295488 | ENSG00000163312 | HELQ | 4:84328495-84377009 | Protein_coding_from_Ensembl | 1.79996 | 0.895576 | 0.00115 |
| ENST00000515303 | ENSG00000163322 | FAM175A | 4:84377084-84444501 | Protein_coding_from_Ensembl | 1.22535 | 0.469955 | 0.02495 |
| ENST00000438245 | ENSG00000163374 | YY1AP1 | 1:155579338-155829191 | Protein_coding_from_Ensembl | 6.52418 | 1.50451 | 0.0011 |
| ENST00000454523 | ENSG00000163374 | YY1AP1 | 1:155579338-155829191 | Protein_coding_from_Ensembl | 4.24951 | 8.93517 | 0.00305 |
| ENST00000496684 | ENSG00000163468 | CCT3 | 1:156278751-156337664 | Protein_coding_from_Ensembl | 6.80208 | 1.37258 | 0.00305 |
| ENST00000404136 | ENSG00000163510 | CWC22 | 2:180809602-180871840 | Protein_coding_from_Ensembl | 0.642171 | 1.87719 | 0.0013 |
| ENST00000420543 | ENSG00000163512 | AZI2 | 3:28283074-28390618 | Protein_coding_from_Ensembl | 1.56911 | 3.44906 | 0.00605 |
| ENST00000409849 | ENSG00000163516 | ANKZF1 | 2:220094478-220142892 | Protein_coding_from_Ensembl | 0.566645 | 1.16855 | 0.0418 |
| ENST00000410034 | ENSG00000163516 | ANKZF1 | 2:220094478-220142892 | Protein_coding_from_Ensembl | 0.77107 | 2.94907 | 5.00E-05 |
| ENST00000295767 | ENSG00000163528 | CHCHD4 | 3:14153579-14166370 | Protein_coding_from_Ensembl | 1.22487 | 0.520345 | 0.04575 |
| ENST00000367169 | ENSG00000163531 | NFASC | 1:204797778-204991950 | Protein_coding_from_Ensembl | 0.478879 | 1.00604 | 5.00E-05 |
| ENST00000392254 | ENSG00000163564 | PYHIN1 | 1:158900585-158946844 | Protein_coding_from_Ensembl | 0.584044 | 1.45501 | 0.03395 |
| ENST00000474473 | ENSG00000163565 | IFI16 | 1:158969757-159024945 | Protein_coding_from_Ensembl | 2.58186 | 1.00115 | 0.02705 |
| ENST00000514711 | ENSG00000163625 | WDFY3 | 4:85590703-85932430 | Protein_coding_from_Ensembl | 3.85881 | 0.615023 | 0.00065 |
| ENST00000511467 | ENSG00000163629 | PTPN13 | 4:87515467-87736324 | Protein_coding_from_Ensembl | 2.39804 | 0.792449 | 5.00E-05 |
| ENST00000411767 | ENSG00000163629 | PTPN13 | 4:87515467-87736324 | Protein_coding_from_Ensembl | 1.8552 | 3.97294 | 5.00E-05 |
| ENST00000449503 | ENSG00000163681 | SLMAP | 3:57741176-57914895 | Protein_coding_from_Ensembl | 0.996533 | 0.452524 | 0.0074 |
| ENST00000416658 | ENSG00000163681 | SLMAP | 3:57741176-57914895 | Protein_coding_from_Ensembl | 4.83885 | 1.51881 | 5.00E-05 |
| ENST00000295959 | ENSG00000163684 | RPP14 | 3:58291971-58310422 | Protein_coding_from_Ensembl | 0.997357 | 0.146382 | 0.0112 |
| ENST00000403601 | ENSG00000163702 | IL17RC | 3:9958757-9975314 | Protein_coding_from_Ensembl | 1.80878 | 0.866485 | 0.0086 |
| ENST00000452070 | ENSG00000163703 | CRELD1 | 3:9975505-9987097 | Protein_coding_from_Ensembl | 1.82376 | 3.67825 | 0.0019 |
| ENST00000493782 | ENSG00000163714 | U2SURP | 3:142645515-142779567 | Protein_coding_from_Ensembl | 5.59302 | 1.96904 | 0.0192 |
| ENST00000351233 | ENSG00000163719 | MTMR14 | 3:9691116-9744077 | Protein_coding_from_Ensembl | 1.49062 | 3.42698 | 0.00035 |
| ENST00000451788 | ENSG00000163743 | RCHY1 | 4:76404246-76475683 | Protein_coding_from_Ensembl | 0.0699078 | 0.950669 | 0.0421 |
| ENST00000296127 | ENSG00000163812 | ZDHHC3 | 3:44956748-45077563 | Protein_coding_from_Ensembl | 1.66703 | 0.815807 | 0.0058 |
| ENST00000465763 | ENSG00000163848 | ZNF148 | 3:124801479-125094198 | Protein_coding_from_Ensembl | 4.83505 | 1.88257 | 0.04205 |
| ENST00000456842 | ENSG00000163866 | SMIM12 | 1:35175643-35325900 | Protein_coding_from_Ensembl | 4.26255 | 1.75867 | 0.0105 |
| ENST00000545472 | ENSG00000163904 | SENP2 | 3:185300283-185542844 | Protein_coding_from_Ensembl | 2.39271 | 0.938475 | 0.0022 |
| ENST00000349441 | ENSG00000163913 | IFT122 | 3:129158967-129239198 | Protein_coding_from_Ensembl | 0.369602 | 1.21039 | 0.0016 |
| ENST00000394738 | ENSG00000163933 | RFT1 | 3:52937587-53164478 | Protein_coding_from_Ensembl | 3.06409 | 1.39815 | 0.00385 |
| ENST00000409114 | ENSG00000163939 | PBRM1 | 3:52529353-52742182 | Protein_coding_from_Ensembl | 1.44716 | 0.645168 | 0.00355 |
| ENST00000423351 | ENSG00000163939 | PBRM1 | 3:52529353-52742182 | Protein_coding_from_Ensembl | 0.778282 | 1.90486 | 0.002 |
| ENST00000296315 | ENSG00000163947 | ARHGEF3 | 3:56761445-57114129 | Protein_coding_from_Ensembl | 4.12694 | 0.636305 | 5.00E-05 |
| ENST00000372508 | ENSG00000164011 | ZNF691 | 1:43312279-43318148 | Protein_coding_from_Ensembl | 2.95367 | 1.37879 | 0.0059 |
| ENST00000339611 | ENSG00000164038 | SLC9B2 | 4:103941024-104021040 | Protein_coding_from_Ensembl | 1.01897 | 2.97436 | 0.001 |
| ENST00000427617 | ENSG00000164048 | ZNF589 | 3:48282589-48343175 | Protein_coding_from_Ensembl | 0.158587 | 1.06065 | 0.02975 |
| ENST00000412052 | ENSG00000164053 | ATRIP | 3:48488113-48509044 | Protein_coding_from_Ensembl | 0.426687 | 1.25322 | 0.0067 |
| ENST00000320211 | ENSG00000164053 | ATRIP | 3:48488113-48509044 | Protein_coding_from_Ensembl | 3.04481 | 1.36415 | 0.0001 |
| ENST00000296444 | ENSG00000164054 | SHISA5 | 3:48509196-48542259 | Protein_coding_from_Ensembl | 1.44638 | 3.9025 | 0.0002 |
| ENST00000432042 | ENSG00000164068 | RNF123 | 3:49711434-49823975 | Protein_coding_from_Ensembl | 2.36604 | 0.993608 | 0.0013 |
| ENST00000505726 | ENSG00000164070 | HSPA4L | 4:128702975-128765195 | Protein_coding_from_Ensembl | 1.09083 | 0.365903 | 0.0134 |
| ENST00000296473 | ENSG00000164077 | MON1A | 3:49924434-49967606 | Protein_coding_from_Ensembl | 0.813703 | 2.86773 | 0.00015 |
| ENST00000296503 | ENSG00000164104 | HMGB2 | 4:174252845-174256276 | Protein_coding_from_Ensembl | 0.73543 | 2.32048 | 0.0019 |
| ENST00000433024 | ENSG00000164114 | MAP9 | 4:156197840-156302498 | Protein_coding_from_Ensembl | 1.23453 | 0.419505 | 0.04775 |
| ENST00000296519 | ENSG00000164118 | CEP44 | 4:175157808-175254531 | Protein_coding_from_Ensembl | 1.02321 | 0.21662 | 0.00105 |
| ENST00000296522 | ENSG00000164120 | HPGD | 4:175411327-175461935 | Protein_coding_from_Ensembl | 0.833764 | 0.352119 | 0.02745 |
| ENST00000309439 | ENSG00000164162 | ANAPC10 | 4:145888263-146101313 | Protein_coding_from_Ensembl | 2.73384 | 1.02429 | 0.03495 |
| ENST00000296657 | ENSG00000164236 | ANKRD33B | 5:10564441-10657959 | Protein_coding_from_Ensembl | 1.89984 | 0.876648 | 0.02355 |
| ENST00000510313 | ENSG00000164292 | RHOBTB3 | 5:95036952-95160087 | Protein_coding_from_Ensembl | 0.716774 | 2.21069 | 0.03605 |
| ENST00000308394 | ENSG00000164305 | CASP3 | 4:185548849-185570663 | Protein_coding_from_Ensembl | 2.81399 | 1.16362 | 0.0001 |
| ENST00000543251 | ENSG00000164338 | UTP15 | 5:72848159-72877794 | Protein_coding_from_Ensembl | 1.44983 | 0.534008 | 0.0147 |
| ENST00000509430 | ENSG00000164347 | GFM2 | 5:73923230-74072737 | Protein_coding_from_Ensembl | 3.3504 | 0.598588 | 5.00E-05 |
| ENST00000378706 | ENSG00000164402 | 8-Sep | 5:132083136-132142933 | Protein_coding_from_Ensembl | 1.18402 | 2.66446 | 5.00E-05 |
| ENST00000538367 | ENSG00000164548 | TRA2A | 7:23544398-23571660 | Protein_coding_from_Ensembl | 0.463205 | 3.69808 | 0.0032 |
| ENST00000432572 | ENSG00000164603 | C7orf60 | 7:112459201-112579971 | Protein_coding_from_Ensembl | 1.83726 | 0.815231 | 0.0395 |
| ENST00000514518 | ENSG00000164615 | CAMLG | 5:134074190-134087847 | Protein_coding_from_Ensembl | 2.08189 | 4.28573 | 0.02565 |
| ENST00000406877 | ENSG00000164649 | CDCA7L | 7:21582832-21985702 | Protein_coding_from_Ensembl | 2.01817 | 0.53094 | 0.0003 |
| ENST00000405785 | ENSG00000164654 | MIOS | 7:7589263-7648560 | Protein_coding_from_Ensembl | 4.25858 | 1.53329 | 5.00E-05 |
| ENST00000340080 | ENSG00000164654 | MIOS | 7:7589263-7648560 | Protein_coding_from_Ensembl | 1.65545 | 3.88944 | 5.00E-05 |
| ENST00000367066 | ENSG00000164691 | TAGAP | 6:159393902-159486305 | Protein_coding_from_Ensembl | 0.87973 | 1.99615 | 0.0001 |
| ENST00000345125 | ENSG00000164733 | CTSB | 8:11700032-11726957 | Protein_coding_from_Ensembl | 2.58048 | 1.13448 | 0.01215 |
| ENST00000453527 | ENSG00000164733 | CTSB | 8:11700032-11726957 | Protein_coding_from_Ensembl | 4.00471 | 10.1856 | 5.00E-05 |
| ENST00000518055 | ENSG00000164754 | RAD21 | 8:117654368-117889107 | Protein_coding_from_Ensembl | 2.33335 | 6.47988 | 0.00245 |
| ENST00000519401 | ENSG00000164808 | SPIDR | 8:48171253-48648868 | Protein_coding_from_Ensembl | 0.504937 | 1.1906 | 0.02725 |
| ENST00000425407 | ENSG00000164828 | SUN1 | 7:855527-936073 | Protein_coding_from_Ensembl | 4.80596 | 2.20846 | 5.00E-05 |
| ENST00000297447 | ENSG00000164830 | OXR1 | 8:107282371-107764922 | Protein_coding_from_Ensembl | 0.474866 | 1.1883 | 0.02965 |
| ENST00000531443 | ENSG00000164830 | OXR1 | 8:107282371-107764922 | Protein_coding_from_Ensembl | 5.10786 | 2.37908 | 5.00E-05 |
| ENST00000461735 | ENSG00000164889 | SLC4A2 | 7:150750898-150773617 | Protein_coding_from_Ensembl | 0.310922 | 1.03348 | 0.00135 |
| ENST00000483786 | ENSG00000164889 | SLC4A2 | 7:150750898-150773617 | Protein_coding_from_Ensembl | 1.64296 | 7.85936 | 0.0068 |
| ENST00000353245 | ENSG00000164924 | YWHAZ | 8:101928752-101965616 | Protein_coding_from_Ensembl | 2.78088 | 0.899754 | 5.00E-05 |
| ENST00000445726 | ENSG00000164970 | FAM219A | 9:34398181-34520982 | Protein_coding_from_Ensembl | 2.23671 | 0.210739 | 0.0003 |
| ENST00000379087 | ENSG00000164970 | FAM219A | 9:34398181-34520982 | Protein_coding_from_Ensembl | 1.6102 | 0.344268 | 0.0004 |
| ENST00000297620 | ENSG00000164970 | FAM219A | 9:34398181-34520982 | Protein_coding_from_Ensembl | 1.21188 | 3.63015 | 5.00E-05 |
| ENST00000356838 | ENSG00000165071 | TMEM71 | 8:133697252-133772958 | Protein_coding_from_Ensembl | 0.205251 | 1.66064 | 0.0154 |
| ENST00000297798 | ENSG00000165102 | HGSNAT | 8:42995555-43057998 | Protein_coding_from_Ensembl | 2.52753 | 0.864895 | 0.0003 |
| ENST00000376264 | ENSG00000165119 | HNRNPK | 9:86582997-86595569 | Protein_coding_from_Ensembl | 1.62334 | 4.86732 | 5.00E-05 |
| ENST00000353234 | ENSG00000165138 | ANKS6 | 9:101493610-101559247 | Protein_coding_from_Ensembl | 2.92433 | 0.253037 | 5.00E-05 |
| ENST00000297857 | ENSG00000165156 | ZHX1 | 8:124232195-124287781 | Protein_coding_from_Ensembl | 4.14523 | 1.8033 | 5.00E-05 |
| ENST00000395571 | ENSG00000165156 | ZHX1 | 8:124232195-124287781 | Protein_coding_from_Ensembl | 1.81692 | 3.82332 | 5.00E-05 |
| ENST00000375245 | ENSG00000165322 | ARHGAP12 | 10:32094364-32217742 | Protein_coding_from_Ensembl | 0.432765 | 1.3007 | 0.0008 |
| ENST00000396144 | ENSG00000165322 | ARHGAP12 | 10:32094364-32217742 | Protein_coding_from_Ensembl | 1.15779 | 2.78231 | 5.00E-05 |
| ENST00000321324 | ENSG00000165457 | FOLR2 | 11:71927644-71932994 | Protein_coding_from_Ensembl | 4.92227 | 2.39669 | 0.0358 |
| ENST00000530304 | ENSG00000165494 | PCF11 | 11:82868029-83134559 | Protein_coding_from_Ensembl | 3.67361 | 0.912879 | 5.00E-05 |
| ENST00000346301 | ENSG00000165533 | TTC8 | 14:89290496-89498098 | Protein_coding_from_Ensembl | 2.83967 | 0.503637 | 0.00025 |
| ENST00000378937 | ENSG00000165609 | NUDT5 | 10:12171635-12292588 | Protein_coding_from_Ensembl | 3.09481 | 1.06709 | 0.02125 |
| ENST00000535553 | ENSG00000165637 | VDAC2 | 10:76969911-76991207 | Protein_coding_from_Ensembl | 0.397196 | 1.08445 | 0.03825 |
| ENST00000535216 | ENSG00000165655 | ZNF503 | 10:77029576-77171600 | Protein_coding_from_Ensembl | 2.36 | 0.577237 | 0.00025 |
| ENST00000444897 | ENSG00000165688 | PMPCA | 9:139305109-139318213 | Protein_coding_from_Ensembl | 0.657275 | 1.68946 | 0.04815 |
| ENST00000371720 | ENSG00000165688 | PMPCA | 9:139305109-139318213 | Protein_coding_from_Ensembl | 0.59818 | 2.12918 | 0.0451 |
| ENST00000440111 | ENSG00000165699 | TSC1 | 9:135766734-135820020 | Protein_coding_from_Ensembl | 4.89899 | 1.13254 | 5.00E-05 |
| ENST00000371691 | ENSG00000165716 | FAM69B | 9:139607021-139622756 | Protein_coding_from_Ensembl | 0.487242 | 1.11969 | 0.0287 |
| ENST00000554028 | ENSG00000165782 | TMEM55B | 14:20923349-20929771 | Protein_coding_from_Ensembl | 2.16852 | 0.429237 | 0.01395 |
| ENST00000382985 | ENSG00000165792 | METTL17 | 14:21457928-21467322 | Protein_coding_from_Ensembl | 1.15227 | 2.56468 | 0.00855 |
| ENST00000397858 | ENSG00000165795 | NDRG2 | 14:21484921-21572881 | Protein_coding_from_Ensembl | 0.879877 | 2.0377 | 0.0083 |
| ENST00000350792 | ENSG00000165795 | NDRG2 | 14:21484921-21572881 | Protein_coding_from_Ensembl | 1.02434 | 2.0996 | 0.0137 |
| ENST00000403829 | ENSG00000165795 | NDRG2 | 14:21484921-21572881 | Protein_coding_from_Ensembl | 5.88796 | 2.7162 | 0.00085 |
| ENST00000298694 | ENSG00000165801 | ARHGEF40 | 14:21484921-21572881 | Protein_coding_from_Ensembl | 4.52371 | 1.62082 | 5.00E-05 |
| ENST00000298693 | ENSG00000165801 | ARHGEF40 | 14:21484921-21572881 | Protein_coding_from_Ensembl | 0.490678 | 3.79818 | 5.00E-05 |
| ENST00000371482 | ENSG00000165802 | NSMF | 9:140342021-140353786 | Protein_coding_from_Ensembl | 0.804686 | 0.367144 | 0.03855 |
| ENST00000371474 | ENSG00000165802 | NSMF | 9:140342021-140353786 | Protein_coding_from_Ensembl | 0.97946 | 1.99772 | 0.00115 |
| ENST00000298717 | ENSG00000165819 | METTL3 | 14:21927178-21979517 | Protein_coding_from_Ensembl | 5.92841 | 1.93126 | 5.00E-05 |
| ENST00000553891 | ENSG00000165861 | ZFYVE1 | 14:73436158-73493920 | Protein_coding_from_Ensembl | 0.211256 | 2.85391 | 0.0002 |
| ENST00000362021 | ENSG00000165915 | SLC39A13 | 11:47404698-47438047 | Protein_coding_from_Ensembl | 1.34715 | 3.48199 | 0.0001 |
| ENST00000444961 | ENSG00000165949 | IFI27 | 14:94571181-94583033 | Protein_coding_from_Ensembl | 1.04216 | 3.63376 | 0.0319 |
| ENST00000423462 | ENSG00000165983 | PTER | 10:16478941-16564004 | Protein_coding_from_Ensembl | 0.814095 | 0.359443 | 0.0275 |
| ENST00000378000 | ENSG00000165983 | PTER | 10:16478941-16564004 | Protein_coding_from_Ensembl | 0.416664 | 0.836229 | 0.01975 |
| ENST00000525141 | ENSG00000166002 | SMCO4 | 11:93211637-93276674 | Protein_coding_from_Ensembl | 3.9759 | 1.65691 | 0.0152 |
| ENST00000325212 | ENSG00000166004 | KIAA1731 | 11:93394804-93547861 | Protein_coding_from_Ensembl | 2.36743 | 0.833243 | 5.00E-05 |
| ENST00000344196 | ENSG00000166004 | KIAA1731 | 11:93394804-93547861 | Protein_coding_from_Ensembl | 0.867063 | 2.20379 | 5.00E-05 |
| ENST00000541150 | ENSG00000166037 | CEP57 | 11:95502105-95565857 | Protein_coding_from_Ensembl | 5.99916 | 2.53962 | 5.00E-05 |
| ENST00000325542 | ENSG00000166037 | CEP57 | 11:95502105-95565857 | Protein_coding_from_Ensembl | 1.55424 | 3.65885 | 5.00E-05 |
| ENST00000559006 | ENSG00000166128 | RAB8B | 15:63481667-63559981 | Protein_coding_from_Ensembl | 4.45534 | 9.55895 | 0.0104 |
| ENST00000299173 | ENSG00000166140 | ZFYVE19 | 15:41060066-41106767 | Protein_coding_from_Ensembl | 1.63576 | 0.646825 | 0.0212 |
| ENST00000562057 | ENSG00000166145 | SPINT1 | 15:41128005-41150405 | Protein_coding_from_Ensembl | 0.311157 | 1.58133 | 0.00155 |
| ENST00000553878 | ENSG00000166165 | CKB | 14:103985995-103989448 | Protein_coding_from_Ensembl | 9.90935 | 2.64397 | 0.0001 |
| ENST00000370007 | ENSG00000166197 | NOLC1 | 10:103911932-103923627 | Protein_coding_from_Ensembl | 2.34867 | 5.53145 | 5.00E-05 |
| ENST00000558843 | ENSG00000166200 | COPS2 | 15:49398267-49913128 | Protein_coding_from_Ensembl | 8.07687 | 2.86544 | 0.0013 |
| ENST00000542928 | ENSG00000166200 | COPS2 | 15:49398267-49913128 | Protein_coding_from_Ensembl | 10.0041 | 3.57865 | 5.00E-05 |
| ENST00000299293 | ENSG00000166225 | FRS2 | 12:69864128-69973562 | Protein_coding_from_Ensembl | 1.13821 | 0.159823 | 0.00025 |
| ENST00000397997 | ENSG00000166225 | FRS2 | 12:69864128-69973562 | Protein_coding_from_Ensembl | 2.29733 | 1.09309 | 5.00E-05 |
| ENST00000529691 | ENSG00000166261 | ZNF202 | 11:123594884-123612383 | Protein_coding_from_Ensembl | 0.508189 | 2.04324 | 5.00E-05 |
| ENST00000372997 | ENSG00000166321 | NUDT13 | 10:74870216-75118617 | Protein_coding_from_Ensembl | 1.49704 | 0.742743 | 0.03505 |
| ENST00000537806 | ENSG00000166333 | ILK | 11:6624871-6633898 | Protein_coding_from_Ensembl | 1.82205 | 0.292097 | 0.01555 |
| ENST00000458297 | ENSG00000166377 | ATP9B | 18:76829284-77138283 | Protein_coding_from_Ensembl | 4.15817 | 11.2498 | 5.00E-05 |
| ENST00000530181 | ENSG00000166387 | PPFIBP2 | 11:7260008-7678358 | Protein_coding_from_Ensembl | 1.13308 | 2.88437 | 5.00E-05 |
| ENST00000528883 | ENSG00000166387 | PPFIBP2 | 11:7260008-7678358 | Protein_coding_from_Ensembl | 0.159023 | 3.44475 | 0.0069 |
| ENST00000299492 | ENSG00000166387 | PPFIBP2 | 11:7260008-7678358 | Protein_coding_from_Ensembl | 8.12692 | 4.06334 | 5.00E-05 |
| ENST00000295211 | ENSG00000166401 | SERPINB8 | 18:61616534-61688260 | Protein_coding_from_Ensembl | 1.78473 | 0.518223 | 0.04215 |
| ENST00000534099 | ENSG00000166402 | TUB | 11:8040790-8190602 | Protein_coding_from_Ensembl | 2.12155 | 0.878834 | 0.00895 |
| ENST00000530438 | ENSG00000166444 | ST5 | 11:8703957-8932498 | Protein_coding_from_Ensembl | 0.471845 | 1.20026 | 0.02185 |
| ENST00000561465 | ENSG00000166450 | PRTG | 15:55903743-56035288 | Protein_coding_from_Ensembl | 0.47832 | 1.13693 | 0.0387 |
| ENST00000534147 | ENSG00000166452 | AKIP1 | 11:8932685-8958768 | Protein_coding_from_Ensembl | 4.27789 | 1.30283 | 0.00365 |
| ENST00000528080 | ENSG00000166471 | TMEM41B | 11:9302200-9336327 | Protein_coding_from_Ensembl | 1.44912 | 3.91999 | 5.00E-05 |
| ENST00000299606 | ENSG00000166478 | ZNF143 | 11:9481102-9550071 | Protein_coding_from_Ensembl | 1.86349 | 0.680987 | 0.0015 |
| ENST00000396597 | ENSG00000166478 | ZNF143 | 11:9481102-9550071 | Protein_coding_from_Ensembl | 0.283738 | 1.81783 | 0.0069 |
| ENST00000450114 | ENSG00000166483 | WEE1 | 11:9595227-9615004 | Protein_coding_from_Ensembl | 1.38248 | 0.61287 | 0.00795 |
| ENST00000299641 | ENSG00000166507 | NDST2 | 10:75545334-75571589 | Protein_coding_from_Ensembl | 0.387858 | 1.00483 | 0.00605 |
| ENST00000309979 | ENSG00000166507 | NDST2 | 10:75545334-75571589 | Protein_coding_from_Ensembl | 3.19068 | 1.41419 | 5.00E-05 |
| ENST00000591504 | ENSG00000166510 | CCDC68 | 18:52568739-52626739 | Protein_coding_from_Ensembl | 0.466408 | 1.42737 | 0.0002 |
| ENST00000527284 | ENSG00000166548 | TK2 | 16:66461199-66586447 | Protein_coding_from_Ensembl | 1.51484 | 3.46351 | 0.0009 |
| ENST00000588875 | ENSG00000166562 | SEC11C | 18:56806708-56826068 | Protein_coding_from_Ensembl | 6.90867 | 3.17444 | 0.0091 |
| ENST00000340353 | ENSG00000166575 | TMEM135 | 11:86748885-87039876 | Protein_coding_from_Ensembl | 1.09961 | 0.440558 | 0.00285 |
| ENST00000532959 | ENSG00000166575 | TMEM135 | 11:86748885-87039876 | Protein_coding_from_Ensembl | 3.00578 | 1.46007 | 0.0256 |
| ENST00000582277 | ENSG00000166579 | NDEL1 | 17:8316448-8534079 | Protein_coding_from_Ensembl | 0.804905 | 3.28731 | 0.0394 |
| ENST00000396560 | ENSG00000166669 | ATF7IP2 | 16:10420290-10577495 | Protein_coding_from_Ensembl | 1.33483 | 0.158795 | 0.0019 |
| ENST00000448080 | ENSG00000166689 | PLEKHA7 | 11:16798845-17074591 | Protein_coding_from_Ensembl | 0.638867 | 1.58535 | 0.00025 |
| ENST00000559222 | ENSG00000166734 | CASC4 | 15:44580908-44719342 | Protein_coding_from_Ensembl | 3.68328 | 9.7568 | 0.00055 |
| ENST00000566490 | ENSG00000166780 | C16orf45 | 16:15005407-16444465 | Protein_coding_from_Ensembl | 0.471462 | 2.11897 | 0.0219 |
| ENST00000430628 | ENSG00000166819 | PLIN1 | 15:90207595-90234014 | Protein_coding_from_Ensembl | 1.33524 | 0.222898 | 0.00575 |
| ENST00000396087 | ENSG00000166833 | NAV2 | 11:19372270-20143144 | Protein_coding_from_Ensembl | 1.30906 | 0.620571 | 5.00E-05 |
| ENST00000496660 | ENSG00000166839 | ANKDD1A | 15:65134081-65251042 | Protein_coding_from_Ensembl | 1.27984 | 0.248997 | 0.03175 |
| ENST00000435680 | ENSG00000166912 | MTMR10 | 15:31196054-31283810 | Protein_coding_from_Ensembl | 2.93049 | 1.20962 | 5.00E-05 |
| ENST00000530234 | ENSG00000166927 | MS4A7 | 11:60102303-60222687 | Protein_coding_from_Ensembl | 2.58637 | 5.3655 | 0.0224 |
| ENST00000300187 | ENSG00000166928 | MS4A14 | 11:60102303-60222687 | Protein_coding_from_Ensembl | 0.1605 | 1.00503 | 0.0158 |
| ENST00000566340 | ENSG00000167005 | NUDT21 | 16:56463044-56554195 | Protein_coding_from_Ensembl | 2.78342 | 6.57211 | 0.02645 |
| ENST00000406644 | ENSG00000167074 | TEF | 22:41763336-41795330 | Protein_coding_from_Ensembl | 0.630028 | 1.71722 | 5.00E-05 |
| ENST00000373489 | ENSG00000167081 | PBX3 | 9:128509616-128729656 | Protein_coding_from_Ensembl | 1.15076 | 2.39466 | 0.0022 |
| ENST00000491787 | ENSG00000167081 | PBX3 | 9:128509616-128729656 | Protein_coding_from_Ensembl | 1.31265 | 2.95484 | 0.04265 |
| ENST00000511832 | ENSG00000167085 | PHB | 17:47448101-47554350 | Protein_coding_from_Ensembl | 5.1017 | 2.02198 | 0.0047 |
| ENST00000582475 | ENSG00000167088 | SNRPD1 | 18:19192227-19213485 | Protein_coding_from_Ensembl | 2.28914 | 5.61961 | 0.0117 |
| ENST00000502667 | ENSG00000167107 | ACSF2 | 17:48503518-48552206 | Protein_coding_from_Ensembl | 1.07242 | 0.25648 | 0.0302 |
| ENST00000546104 | ENSG00000167112 | TRUB2 | 9:131071381-131096351 | Protein_coding_from_Ensembl | 1.81023 | 0.740305 | 0.0195 |
| ENST00000300605 | ENSG00000167220 | HDHD2 | 18:44632316-44702745 | Protein_coding_from_Ensembl | 1.7476 | 4.24145 | 5.00E-05 |
| ENST00000358896 | ENSG00000167264 | DUS2 | 16:68021296-68272005 | Protein_coding_from_Ensembl | 1.18803 | 2.46736 | 0.00755 |
| ENST00000311595 | ENSG00000167280 | ENGASE | 17:77071020-77084681 | Protein_coding_from_Ensembl | 2.40886 | 0.576872 | 0.0087 |
| ENST00000526337 | ENSG00000167333 | TRIM68 | 11:4619901-4629489 | Protein_coding_from_Ensembl | 0.72518 | 3.08911 | 0.01825 |
| ENST00000589115 | ENSG00000167468 | GPX4 | 19:1103935-1106787 | Protein_coding_from_Ensembl | 1.07574 | 5.4708 | 0.00345 |
| ENST00000358713 | ENSG00000167491 | GATAD2A | 19:19386826-19619740 | Protein_coding_from_Ensembl | 0.295693 | 0.939473 | 0.0006 |
| ENST00000457895 | ENSG00000167491 | GATAD2A | 19:19386826-19619740 | Protein_coding_from_Ensembl | 0.901793 | 5.22565 | 0.01405 |
| ENST00000301030 | ENSG00000167522 | ANKRD11 | 16:89334037-89556969 | Protein_coding_from_Ensembl | 7.71867 | 2.89692 | 5.00E-05 |
| ENST00000378330 | ENSG00000167522 | ANKRD11 | 16:89334037-89556969 | Protein_coding_from_Ensembl | 2.1853 | 8.94253 | 5.00E-05 |
| ENST00000378895 | ENSG00000167536 | DHRS13 | 17:27224755-27230089 | Protein_coding_from_Ensembl | 1.35716 | 0.620704 | 0.03065 |
| ENST00000391787 | ENSG00000167555 | ZNF528 | 19:52892094-52921665 | Protein_coding_from_Ensembl | 5.46674 | 1.34018 | 0.0222 |
| ENST00000391742 | ENSG00000167613 | LAIR1 | 19:54865361-54882165 | Protein_coding_from_Ensembl | 3.99138 | 1.76201 | 0.00055 |
| ENST00000348231 | ENSG00000167613 | LAIR1 | 19:54865361-54882165 | Protein_coding_from_Ensembl | 0.722762 | 2.60991 | 0.0062 |
| ENST00000587090 | ENSG00000167642 | SPINT2 | 19:38734674-38795677 | Protein_coding_from_Ensembl | 0.693495 | 2.30866 | 0.0137 |
| ENST00000392124 | ENSG00000167645 | YIF1B | 19:38795752-38807913 | Protein_coding_from_Ensembl | 1.3599 | 0.259155 | 0.0208 |
| ENST00000339413 | ENSG00000167645 | YIF1B | 19:38795752-38807913 | Protein_coding_from_Ensembl | 2.79385 | 1.2402 | 0.0145 |
| ENST00000394765 | ENSG00000167671 | UBXN6 | 19:4402658-4457819 | Protein_coding_from_Ensembl | 7.58963 | 0.733162 | 5.00E-05 |
| ENST00000586684 | ENSG00000167674 | HDGFRP2 | 19:4472283-4517716 | Protein_coding_from_Ensembl | 6.37886 | 2.85071 | 5.00E-05 |
| ENST00000586965 | ENSG00000167680 | SEMA6B | 19:4542599-4559820 | Protein_coding_from_Ensembl | 2.72206 | 0.896459 | 0.00055 |
| ENST00000301329 | ENSG00000167699 | GLOD4 | 17:660336-695895 | Protein_coding_from_Ensembl | 4.21431 | 1.93443 | 0.0001 |
| ENST00000575251 | ENSG00000167740 | CYB5D2 | 17:3617921-4269923 | Protein_coding_from_Ensembl | 2.13253 | 0.640535 | 0.0186 |
| ENST00000598463 | ENSG00000167747 | C19orf48 | 19:51300960-51308186 | Protein_coding_from_Ensembl | 0.375426 | 1.75681 | 0.0127 |
| ENST00000301096 | ENSG00000167766 | ZNF83 | 19:53030904-53193749 | Protein_coding_from_Ensembl | 1.14377 | 0.440979 | 0.0189 |
| ENST00000548547 | ENSG00000167779 | IGFBP6 | 12:53491219-53496129 | Protein_coding_from_Ensembl | 1.4595 | 0.24229 | 0.02485 |
| ENST00000601372 | ENSG00000167785 | ZNF558 | 19:8920379-8943004 | Protein_coding_from_Ensembl | 2.91158 | 0.955097 | 5.00E-05 |
| ENST00000301475 | ENSG00000167785 | ZNF558 | 19:8920379-8943004 | Protein_coding_from_Ensembl | 0.545629 | 2.37061 | 5.00E-05 |
| ENST00000589691 | ENSG00000167895 | TMC8 | 17:76000248-76139049 | Protein_coding_from_Ensembl | 1.40453 | 0.667061 | 0.0039 |
| ENST00000434581 | ENSG00000167904 | TMEM68 | 8:56608982-56738007 | Protein_coding_from_Ensembl | 1.25223 | 0.519392 | 0.01235 |
| ENST00000449945 | ENSG00000167930 | ITFG3 | 16:284544-333003 | Protein_coding_from_Ensembl | 0.589796 | 2.82584 | 0.02385 |
| ENST00000565250 | ENSG00000167965 | MLST8 | 16:2205698-2324592 | Protein_coding_from_Ensembl | 2.46707 | 0.900681 | 0.0075 |
| ENST00000565090 | ENSG00000167967 | E4F1 | 16:2205698-2324592 | Protein_coding_from_Ensembl | 1.30996 | 0.630242 | 0.04465 |
| ENST00000301773 | ENSG00000167994 | RAB3IL1 | 11:61664772-61687741 | Protein_coding_from_Ensembl | 1.31353 | 0.523669 | 0.0199 |
| ENST00000535296 | ENSG00000168003 | SLC3A2 | 11:62623517-62656355 | Protein_coding_from_Ensembl | 1.36872 | 0.32895 | 0.01505 |
| ENST00000529189 | ENSG00000168056 | LTBP3 | 11:65306275-65326401 | Protein_coding_from_Ensembl | 0.415029 | 2.61146 | 0.0031 |
| ENST00000529996 | ENSG00000168061 | SAC3D1 | 11:64808372-64826021 | Protein_coding_from_Ensembl | 0.480773 | 2.11779 | 0.00825 |
| ENST00000294066 | ENSG00000168067 | MAP4K2 | 11:64556289-64570713 | Protein_coding_from_Ensembl | 2.39941 | 0.876358 | 5.00E-05 |
| ENST00000380385 | ENSG00000168079 | SCARA5 | 8:27727398-27850244 | Protein_coding_from_Ensembl | 6.48398 | 2.31835 | 5.00E-05 |
| ENST00000545356 | ENSG00000168116 | KIAA1586 | 6:56911346-56920023 | Protein_coding_from_Ensembl | 1.24802 | 0.465518 | 0.00945 |
| ENST00000407969 | ENSG00000168137 | SETD5 | 3:9022274-9520924 | Protein_coding_from_Ensembl | 3.95711 | 8.23302 | 5.00E-05 |
| ENST00000348160 | ENSG00000168214 | RBPJ | 4:26165076-26436541 | Protein_coding_from_Ensembl | 1.40317 | 0.369951 | 0.01905 |
| ENST00000354773 | ENSG00000168237 | GLYCTK | 3:52288436-52333083 | Protein_coding_from_Ensembl | 0.515401 | 1.13202 | 0.0088 |
| ENST00000513438 | ENSG00000168255 | POLR2J3 | 7:102122891-102312088 | Protein_coding_from_Ensembl | 7.39523 | 2.71111 | 0.0165 |
| ENST00000457167 | ENSG00000168259 | DNAJC7 | 17:40118758-40250469 | Protein_coding_from_Ensembl | 1.011 | 3.11205 | 0.00095 |
| ENST00000307076 | ENSG00000168268 | NT5DC2 | 3:52529353-52742182 | Protein_coding_from_Ensembl | 2.12624 | 0.845015 | 0.01835 |
| ENST00000463280 | ENSG00000168297 | PXK | 3:58318606-58411748 | Protein_coding_from_Ensembl | 1.35689 | 0.436397 | 0.00415 |
| ENST00000360540 | ENSG00000168300 | PCMTD1 | 8:52730139-52811735 | Protein_coding_from_Ensembl | 0.149674 | 3.4884 | 0.0019 |
| ENST00000495625 | ENSG00000168386 | FILIP1L | 3:99536677-99897447 | Protein_coding_from_Ensembl | 0.407839 | 1.04314 | 0.01105 |
| ENST00000404914 | ENSG00000168397 | ATG4B | 2:242523819-242613272 | Protein_coding_from_Ensembl | 5.87582 | 2.86537 | 5.00E-05 |
| ENST00000306005 | ENSG00000168398 | BDKRB2 | 14:96671015-96735304 | Protein_coding_from_Ensembl | 0.873544 | 1.85157 | 0.0009 |
| ENST00000368930 | ENSG00000168438 | CDC40 | 6:110501343-110679475 | Protein_coding_from_Ensembl | 0.293954 | 2.13946 | 0.0051 |
| ENST00000529687 | ENSG00000168522 | FNTA | 8:42704779-42940932 | Protein_coding_from_Ensembl | 1.20677 | 2.60638 | 0.00935 |
| ENST00000404395 | ENSG00000168610 | STAT3 | 17:40465341-40540586 | Protein_coding_from_Ensembl | 5.35878 | 11.9792 | 5.00E-05 |
| ENST00000375702 | ENSG00000168646 | AXIN2 | 17:63524680-64188202 | Protein_coding_from_Ensembl | 1.65691 | 0.697182 | 0.0059 |
| ENST00000399848 | ENSG00000168675 | LDLRAD4 | 18:13217496-13652754 | Protein_coding_from_Ensembl | 0.868345 | 0.308773 | 0.00035 |
| ENST00000503451 | ENSG00000168743 | NPNT | 4:106473776-106943635 | Protein_coding_from_Ensembl | 2.05095 | 0.420391 | 0.0039 |
| ENST00000442264 | ENSG00000168758 | SEMA4C | 2:97525452-97539075 | Protein_coding_from_Ensembl | 4.11902 | 1.14826 | 0.00765 |
| ENST00000369836 | ENSG00000168765 | GSTM4 | 1:110158725-110318050 | Protein_coding_from_Ensembl | 2.78559 | 1.34836 | 0.02055 |
| ENST00000389589 | ENSG00000168779 | SHOX2 | 3:157814947-158288858 | Protein_coding_from_Ensembl | 0.643871 | 1.36052 | 0.02935 |
| ENST00000360301 | ENSG00000168781 | PPIP5K1 | 15:43650369-44010458 | Protein_coding_from_Ensembl | 0.922935 | 0.336141 | 0.00445 |
| ENST00000525632 | ENSG00000168807 | SNTB2 | 16:69139466-69442474 | Protein_coding_from_Ensembl | 10.1572 | 3.33638 | 0.0098 |
| ENST00000264263 | ENSG00000168827 | GFM1 | 3:158362066-158410364 | Protein_coding_from_Ensembl | 0.907738 | 2.53273 | 5.00E-05 |
| ENST00000409470 | ENSG00000168883 | USP39 | 2:85825669-85876403 | Protein_coding_from_Ensembl | 1.00183 | 2.68489 | 0.00095 |
| ENST00000393079 | ENSG00000168917 | SLC35G2 | 3:136537488-136580901 | Protein_coding_from_Ensembl | 2.55227 | 0.716161 | 0.00285 |
| ENST00000446465 | ENSG00000168917 | SLC35G2 | 3:136537488-136580901 | Protein_coding_from_Ensembl | 0.46438 | 3.01777 | 0.00025 |
| ENST00000303277 | ENSG00000168936 | TMEM129 | 4:1717678-1723085 | Protein_coding_from_Ensembl | 1.22946 | 0.535069 | 0.0108 |
| ENST00000392059 | ENSG00000168958 | MFF | 2:228029280-228222552 | Protein_coding_from_Ensembl | 1.56896 | 0.475284 | 0.0054 |
| ENST00000521173 | ENSG00000169045 | HNRNPH1 | 5:179041178-179061785 | Protein_coding_from_Ensembl | 8.23897 | 3.37369 | 0.0039 |
| ENST00000351487 | ENSG00000169062 | UPF3A | 13:115047058-115071283 | Protein_coding_from_Ensembl | 1.04454 | 4.29911 | 5.00E-05 |
| ENST00000559991 | ENSG00000169105 | CHST14 | 15:40763159-40765353 | Protein_coding_from_Ensembl | 0.548766 | 1.99589 | 0.0025 |
| ENST00000513238 | ENSG00000169116 | PARM1 | 4:75858304-75975325 | Protein_coding_from_Ensembl | 0.0631159 | 1.10734 | 0.02875 |
| ENST00000304129 | ENSG00000169129 | AFAP1L2 | 10:116054582-116164515 | Protein_coding_from_Ensembl | 2.39344 | 1.11155 | 5.00E-05 |
| ENST00000369271 | ENSG00000169129 | AFAP1L2 | 10:116054582-116164515 | Protein_coding_from_Ensembl | 1.34983 | 3.23996 | 5.00E-05 |
| ENST00000323446 | ENSG00000169169 | CPT1C | 19:50194154-50216988 | Protein_coding_from_Ensembl | 0.167146 | 1.01787 | 0.0124 |
| ENST00000569315 | ENSG00000169180 | XPO6 | 16:28109299-28223241 | Protein_coding_from_Ensembl | 4.81121 | 2.02114 | 0.01925 |
| ENST00000454127 | ENSG00000169239 | CA5B | X:15693039-15805747 | Protein_coding_from_Ensembl | 3.75474 | 1.87337 | 0.00025 |
| ENST00000320474 | ENSG00000169255 | B3GALNT1 | 3:160801670-160971320 | Protein_coding_from_Ensembl | 0.524585 | 3.94724 | 5.00E-05 |
| ENST00000389636 | ENSG00000169282 | KCNAB1 | 3:155755489-156256545 | Protein_coding_from_Ensembl | 1.10508 | 0.205502 | 0.02855 |
| ENST00000332896 | ENSG00000169372 | CRADD | 12:94071150-94370048 | Protein_coding_from_Ensembl | 2.65445 | 1.15295 | 0.0207 |
| ENST00000522684 | ENSG00000169398 | PTK2 | 8:141667998-142012315 | Protein_coding_from_Ensembl | 3.26134 | 1.39409 | 5.00E-05 |
| ENST00000395218 | ENSG00000169398 | PTK2 | 8:141667998-142012315 | Protein_coding_from_Ensembl | 0.727879 | 4.15698 | 5.00E-05 |
| ENST00000517887 | ENSG00000169398 | PTK2 | 8:141667998-142012315 | Protein_coding_from_Ensembl | 1.60608 | 6.36639 | 5.00E-05 |
| ENST00000454569 | ENSG00000169432 | SCN9A | 2:166813698-167232503 | Protein_coding_from_Ensembl | 2.11358 | 1.02713 | 0.0234 |
| ENST00000521590 | ENSG00000169439 | SDC2 | 8:97505578-97624000 | Protein_coding_from_Ensembl | 4.48685 | 19.1997 | 0.0005 |
| ENST00000420274 | ENSG00000169499 | PLEKHA2 | 8:38758752-38831428 | Protein_coding_from_Ensembl | 2.00223 | 4.18211 | 5.00E-05 |
| ENST00000392861 | ENSG00000169554 | ZEB2 | 2:145141647-145337001 | Protein_coding_from_Ensembl | 11.7149 | 4.91573 | 5.00E-05 |
| ENST00000508488 | ENSG00000169567 | HINT1 | 5:130494719-130541120 | Protein_coding_from_Ensembl | 4.0717 | 1.41002 | 0.01835 |
| ENST00000378209 | ENSG00000169598 | DFFB | 1:3773844-3801993 | Protein_coding_from_Ensembl | 1.193 | 0.449329 | 0.00485 |
| ENST00000303698 | ENSG00000169599 | NFU1 | 2:69622881-69664760 | Protein_coding_from_Ensembl | 5.35887 | 2.35626 | 0.00275 |
| ENST00000462320 | ENSG00000169599 | NFU1 | 2:69622881-69664760 | Protein_coding_from_Ensembl | 2.50656 | 6.46905 | 0.0226 |
| ENST00000407464 | ENSG00000169635 | HIC2 | 22:21771692-21805752 | Protein_coding_from_Ensembl | 0.544665 | 1.50913 | 5.00E-05 |
| ENST00000565975 | ENSG00000169682 | SPNS1 | 16:28985541-29002104 | Protein_coding_from_Ensembl | 1.45335 | 0.650166 | 0.02415 |
| ENST00000311008 | ENSG00000169682 | SPNS1 | 16:28985541-29002104 | Protein_coding_from_Ensembl | 2.26523 | 6.76998 | 5.00E-05 |
| ENST00000504813 | ENSG00000169714 | CNBP | 3:128888326-128902765 | Protein_coding_from_Ensembl | 2.32011 | 6.24955 | 5.00E-05 |
| ENST00000399920 | ENSG00000169762 | TAPT1 | 4:16162127-16357365 | Protein_coding_from_Ensembl | 2.19508 | 0.413099 | 0.00625 |
| ENST00000557798 | ENSG00000169783 | LINGO1 | 15:77905368-78113242 | Protein_coding_from_Ensembl | 0.91132 | 2.28682 | 0.0385 |
| ENST00000371834 | ENSG00000169925 | BRD3 | 9:136890560-136933657 | Protein_coding_from_Ensembl | 0.37491 | 0.81456 | 0.04955 |
| ENST00000252799 | ENSG00000169955 | ZNF747 | 16:30535324-30569819 | Protein_coding_from_Ensembl | 0.830374 | 0.271386 | 0.00405 |
| ENST00000535210 | ENSG00000169955 | ZNF747 | 16:30535324-30569819 | Protein_coding_from_Ensembl | 2.18345 | 0.598185 | 0.0061 |
| ENST00000444716 | ENSG00000170011 | MYRIP | 3:39850404-40353915 | Protein_coding_from_Ensembl | 2.5556 | 0.891986 | 0.0003 |
| ENST00000443967 | ENSG00000170085 | SIMC1 | 5:175665364-175772994 | Protein_coding_from_Ensembl | 1.38835 | 0.676284 | 0.00395 |
| ENST00000429602 | ENSG00000170085 | SIMC1 | 5:175665364-175772994 | Protein_coding_from_Ensembl | 1.26635 | 2.66984 | 0.00305 |
| ENST00000379774 | ENSG00000170222 | ADPRM | 17:10583653-10718481 | Protein_coding_from_Ensembl | 1.65206 | 3.86099 | 0.0046 |
| ENST00000304298 | ENSG00000170276 | HSPB2 | 11:111652918-111797596 | Protein_coding_from_Ensembl | 1.96903 | 0.713297 | 0.01895 |
| ENST00000577640 | ENSG00000170315 | UBB | 17:16284111-16287220 | Protein_coding_from_Ensembl | 11.3985 | 24.9611 | 5.00E-05 |
| ENST00000524794 | ENSG00000170322 | NFRKB | 11:129733530-129765485 | Protein_coding_from_Ensembl | 1.11934 | 0.501083 | 0.0025 |
| ENST00000408946 | ENSG00000170473 | WIBG | 12:56295196-56347884 | Protein_coding_from_Ensembl | 1.0445 | 2.11451 | 0.0489 |
| ENST00000398213 | ENSG00000170473 | WIBG | 12:56295196-56347884 | Protein_coding_from_Ensembl | 5.71141 | 2.78698 | 0.0037 |
| ENST00000508934 | ENSG00000170571 | EMB | 5:49692025-49739082 | Protein_coding_from_Ensembl | 0.415779 | 1.87659 | 0.0089 |
| ENST00000454559 | ENSG00000170632 | ARMC10 | 7:102715327-102740205 | Protein_coding_from_Ensembl | 1.19914 | 0.0356611 | 0.00905 |
| ENST00000361243 | ENSG00000170776 | AKAP13 | 15:85923801-86300336 | Protein_coding_from_Ensembl | 0.666031 | 2.17837 | 5.00E-05 |
| ENST00000391752 | ENSG00000170889 | RPS9 | 19:54704609-54752862 | Protein_coding_from_Ensembl | 6.45169 | 1.05401 | 0.0066 |
| ENST00000302937 | ENSG00000170892 | TSEN34 | 19:54693788-54697585 | Protein_coding_from_Ensembl | 0.646966 | 2.33909 | 0.00475 |
| ENST00000352966 | ENSG00000171033 | PKIA | 8:79338337-79517502 | Protein_coding_from_Ensembl | 0.203871 | 0.810556 | 0.04345 |
| ENST00000600815 | ENSG00000171051 | FPR1 | 19:52248424-52346577 | Protein_coding_from_Ensembl | 2.481 | 0.75344 | 0.04775 |
| ENST00000306108 | ENSG00000171103 | TRMT61B | 2:28974505-29093167 | Protein_coding_from_Ensembl | 3.89629 | 1.83407 | 0.0031 |
| ENST00000421201 | ENSG00000171132 | PRKCE | 2:45878483-46415129 | Protein_coding_from_Ensembl | 3.24415 | 1.37332 | 0.02025 |
| ENST00000302188 | ENSG00000171174 | RBKS | 2:27994583-28561768 | Protein_coding_from_Ensembl | 1.2091 | 0.299817 | 0.01855 |
| ENST00000392446 | ENSG00000171302 | CANT1 | 17:76987798-77005949 | Protein_coding_from_Ensembl | 0.869686 | 2.05533 | 0.0007 |
| ENST00000591773 | ENSG00000171302 | CANT1 | 17:76987798-77005949 | Protein_coding_from_Ensembl | 1.3801 | 3.08954 | 0.00265 |
| ENST00000370854 | ENSG00000171307 | ZDHHC16 | 10:99205887-99217127 | Protein_coding_from_Ensembl | 3.74968 | 1.22434 | 0.0002 |
| ENST00000303694 | ENSG00000171310 | CHST11 | 12:104849072-105155792 | Protein_coding_from_Ensembl | 4.15097 | 1.01224 | 5.00E-05 |
| ENST00000547956 | ENSG00000171310 | CHST11 | 12:104849072-105155792 | Protein_coding_from_Ensembl | 0.530793 | 3.75749 | 0.00725 |
| ENST00000549260 | ENSG00000171310 | CHST11 | 12:104849072-105155792 | Protein_coding_from_Ensembl | 1.62646 | 4.42265 | 5.00E-05 |
| ENST00000446774 | ENSG00000171408 | PDE7B | 6:136172833-136546762 | Protein_coding_from_Ensembl | 2.49722 | 5.92852 | 0.0109 |
| ENST00000591046 | ENSG00000171443 | ZNF524 | 19:56102745-56114504 | Protein_coding_from_Ensembl | 0.385568 | 2.69107 | 0.0092 |
| ENST00000373654 | ENSG00000171448 | ZBTB26 | 9:125677844-125693779 | Protein_coding_from_Ensembl | 0.184822 | 1.42693 | 0.0158 |
| ENST00000590155 | ENSG00000171466 | ZNF562 | 19:9759329-9785776 | Protein_coding_from_Ensembl | 3.44776 | 0.681928 | 0.0004 |
| ENST00000394103 | ENSG00000171475 | WIPF2 | 17:38375555-38440388 | Protein_coding_from_Ensembl | 2.30768 | 0.769939 | 0.0018 |
| ENST00000436319 | ENSG00000171502 | COL24A1 | 1:86194915-86622626 | Protein_coding_from_Ensembl | 1.09861 | 0.391084 | 0.0001 |
| ENST00000456404 | ENSG00000171552 | BCL2L1 | 20:30252254-30311792 | Protein_coding_from_Ensembl | 3.80504 | 0.649081 | 0.01235 |
| ENST00000420488 | ENSG00000171552 | BCL2L1 | 20:30252254-30311792 | Protein_coding_from_Ensembl | 1.1241 | 5.66946 | 0.003 |
| ENST00000306910 | ENSG00000171574 | ZNF584 | 19:58912870-58929694 | Protein_coding_from_Ensembl | 1.22628 | 0.294992 | 0.007 |
| ENST00000542092 | ENSG00000171631 | P2RY6 | 11:72975549-73009662 | Protein_coding_from_Ensembl | 1.21834 | 0.322696 | 0.01995 |
| ENST00000580465 | ENSG00000171634 | BPTF | 17:65821639-65980494 | Protein_coding_from_Ensembl | 1.18681 | 0.408446 | 0.0405 |
| ENST00000400913 | ENSG00000171680 | PLEKHG5 | 1:6484847-6580121 | Protein_coding_from_Ensembl | 1.24052 | 2.78988 | 5.00E-05 |
| ENST00000332298 | ENSG00000171700 | RGS19 | 20:62704533-62711323 | Protein_coding_from_Ensembl | 4.77383 | 1.84035 | 0.0005 |
| ENST00000395042 | ENSG00000171700 | RGS19 | 20:62704533-62711323 | Protein_coding_from_Ensembl | 1.57877 | 5.26628 | 5.00E-05 |
| ENST00000558336 | ENSG00000171766 | GATM | 15:45653321-45713617 | Protein_coding_from_Ensembl | 2.4194 | 5.08768 | 0.00065 |
| ENST00000454404 | ENSG00000171777 | RASGRP4 | 19:38893774-38916945 | Protein_coding_from_Ensembl | 0.31174 | 0.958221 | 0.0089 |
| ENST00000489288 | ENSG00000171792 | RHNO1 | 12:2904118-3050306 | Protein_coding_from_Ensembl | 1.78905 | 0.753779 | 0.0134 |
| ENST00000372616 | ENSG00000171793 | CTPS1 | 1:41445006-41478235 | Protein_coding_from_Ensembl | 1.43422 | 0.352762 | 0.0078 |
| ENST00000543104 | ENSG00000171793 | CTPS1 | 1:41445006-41478235 | Protein_coding_from_Ensembl | 0.376633 | 1.14727 | 0.04685 |
| ENST00000541520 | ENSG00000171793 | CTPS1 | 1:41445006-41478235 | Protein_coding_from_Ensembl | 0.714942 | 2.91552 | 0.00085 |
| ENST00000316433 | ENSG00000171817 | ZNF540 | 19:37988062-38210691 | Protein_coding_from_Ensembl | 1.77923 | 0.743002 | 0.00095 |
| ENST00000544779 | ENSG00000171824 | EXOSC10 | 1:11126674-11162157 | Protein_coding_from_Ensembl | 1.31916 | 3.1606 | 5.00E-05 |
| ENST00000586475 | ENSG00000171827 | ZNF570 | 19:37902056-37976260 | Protein_coding_from_Ensembl | 0.873535 | 0.224024 | 0.0368 |
| ENST00000542920 | ENSG00000171840 | NINJ2 | 12:673461-772945 | Protein_coding_from_Ensembl | 2.77488 | 0.675587 | 0.04175 |
| ENST00000429426 | ENSG00000171843 | MLLT3 | 9:20341662-20622542 | Protein_coding_from_Ensembl | 3.07989 | 1.4901 | 0.00235 |
| ENST00000382110 | ENSG00000171853 | TRAPPC12 | 2:3383445-3488865 | Protein_coding_from_Ensembl | 0.583485 | 2.09888 | 0.0007 |
| ENST00000398888 | ENSG00000172046 | USP19 | 3:49145478-49158371 | Protein_coding_from_Ensembl | 1.67264 | 0.425827 | 0.0001 |
| ENST00000398892 | ENSG00000172046 | USP19 | 3:49145478-49158371 | Protein_coding_from_Ensembl | 0.479454 | 1.31809 | 0.00045 |
| ENST00000453664 | ENSG00000172046 | USP19 | 3:49145478-49158371 | Protein_coding_from_Ensembl | 0.481845 | 2.3617 | 5.00E-05 |
| ENST00000306026 | ENSG00000172046 | USP19 | 3:49145478-49158371 | Protein_coding_from_Ensembl | 1.41057 | 3.15072 | 0.00175 |
| ENST00000579695 | ENSG00000172057 | ORMDL3 | 17:38077293-38083854 | Protein_coding_from_Ensembl | 2.08587 | 4.25208 | 0.0003 |
| ENST00000439944 | ENSG00000172061 | LRRC15 | 3:194075975-194090472 | Protein_coding_from_Ensembl | 1.18507 | 3.2539 | 5.00E-05 |
| ENST00000438735 | ENSG00000172215 | CXCR6 | 3:45959395-46037316 | Protein_coding_from_Ensembl | 0.197553 | 1.06024 | 0.02335 |
| ENST00000354202 | ENSG00000172269 | DPAGT1 | 11:118967212-118989252 | Protein_coding_from_Ensembl | 2.21751 | 1.00678 | 0.0046 |
| ENST00000333511 | ENSG00000172270 | BSG | 19:567211-583498 | Protein_coding_from_Ensembl | 0.240545 | 0.823881 | 0.04765 |
| ENST00000302987 | ENSG00000172349 | IL16 | 15:81451915-81616524 | Protein_coding_from_Ensembl | 0.557526 | 1.62889 | 0.0004 |
| ENST00000307126 | ENSG00000172432 | GTPBP2 | 6:43543886-43596899 | Protein_coding_from_Ensembl | 5.16261 | 1.82586 | 5.00E-05 |
| ENST00000538234 | ENSG00000172530 | BANP | 16:87982849-88110924 | Protein_coding_from_Ensembl | 0.572008 | 1.67332 | 0.00555 |
| ENST00000539041 | ENSG00000172594 | SMPDL3A | 6:123110314-123130865 | Protein_coding_from_Ensembl | 0.60455 | 1.5163 | 0.0384 |
| ENST00000311015 | ENSG00000172687 | ZNF738 | 19:21541731-21571384 | Protein_coding_from_Ensembl | 0.832427 | 0.260084 | 0.0269 |
| ENST00000453768 | ENSG00000172725 | CORO1B | 11:67202980-67211292 | Protein_coding_from_Ensembl | 2.59114 | 0.891434 | 0.0107 |
| ENST00000398612 | ENSG00000172748 | ZNF596 | 8:158344-197342 | Protein_coding_from_Ensembl | 1.8033 | 0.499296 | 0.0004 |
| ENST00000379406 | ENSG00000172766 | NAA16 | 13:41885340-41951166 | Protein_coding_from_Ensembl | 2.00709 | 0.986837 | 0.00015 |
| ENST00000569266 | ENSG00000172775 | FAM192A | 16:57186377-57220028 | Protein_coding_from_Ensembl | 5.31033 | 0.85274 | 0.00245 |
| ENST00000567044 | ENSG00000172775 | FAM192A | 16:57186377-57220028 | Protein_coding_from_Ensembl | 0.901542 | 2.57006 | 0.0248 |
| ENST00000376757 | ENSG00000172830 | SSH3 | 11:67070918-67080078 | Protein_coding_from_Ensembl | 0.358501 | 1.45239 | 0.00205 |
| ENST00000395528 | ENSG00000172901 | AQPEP | 5:115298150-115395815 | Protein_coding_from_Ensembl | 0.824089 | 0.197517 | 0.0242 |
| ENST00000515828 | ENSG00000172932 | ANKRD13D | 11:67056017-67069956 | Protein_coding_from_Ensembl | 1.00386 | 2.62223 | 0.0198 |
| ENST00000309099 | ENSG00000172935 | MRGPRF | 11:68771861-68785915 | Protein_coding_from_Ensembl | 1.76492 | 5.10754 | 5.00E-05 |
| ENST00000452796 | ENSG00000172992 | DCAKD | 17:43100707-43221548 | Protein_coding_from_Ensembl | 2.52331 | 0.968056 | 0.00155 |
| ENST00000582266 | ENSG00000173065 | FAM222B | 17:27082995-27188085 | Protein_coding_from_Ensembl | 1.2292 | 0.475024 | 0.01215 |
| ENST00000603713 | ENSG00000173068 | BNC2 | 9:16409500-16870841 | Protein_coding_from_Ensembl | 4.69543 | 1.8033 | 0.0052 |
| ENST00000411752 | ENSG00000173068 | BNC2 | 9:16409500-16870841 | Protein_coding_from_Ensembl | 2.48161 | 5.09629 | 0.0001 |
| ENST00000308860 | ENSG00000173137 | ADCK5 | 8:145596789-145634753 | Protein_coding_from_Ensembl | 1.48292 | 0.545533 | 0.0123 |
| ENST00000468670 | ENSG00000173153 | ESRRA | 11:64073043-64085556 | Protein_coding_from_Ensembl | 2.92054 | 1.0916 | 0.0474 |
| ENST00000355824 | ENSG00000173258 | ZNF483 | 9:114287438-114393569 | Protein_coding_from_Ensembl | 0.310891 | 1.49462 | 0.0344 |
| ENST00000546139 | ENSG00000173264 | GPR137 | 11:64037301-64056972 | Protein_coding_from_Ensembl | 1.61175 | 3.23738 | 0.013 |
| ENST00000532507 | ENSG00000173327 | MAP3K11 | 11:65365225-65382853 | Protein_coding_from_Ensembl | 2.10867 | 0.588395 | 0.00465 |
| ENST00000432749 | ENSG00000173369 | C1QB | 1:22979254-22988031 | Protein_coding_from_Ensembl | 1.23771 | 2.78266 | 0.0326 |
| ENST00000398602 | ENSG00000173418 | NAA20 | 20:19997759-20014299 | Protein_coding_from_Ensembl | 0.734759 | 1.65383 | 0.02685 |
| ENST00000536263 | ENSG00000173480 | ZNF417 | 19:58281022-58427978 | Protein_coding_from_Ensembl | 1.22947 | 0.223481 | 0.01325 |
| ENST00000400053 | ENSG00000173482 | PTPRM | 18:7566779-8406951 | Protein_coding_from_Ensembl | 0.725662 | 3.68553 | 5.00E-05 |
| ENST00000588740 | ENSG00000173581 | CCDC106 | 19:56146381-56164527 | Protein_coding_from_Ensembl | 2.40244 | 0.816012 | 0.00885 |
| ENST00000409315 | ENSG00000173744 | AGFG1 | 2:228336847-228425930 | Protein_coding_from_Ensembl | 1.66523 | 0.704913 | 0.0021 |
| ENST00000413580 | ENSG00000173868 | PHOSPHO1 | 17:47300723-47308128 | Protein_coding_from_Ensembl | 1.83816 | 3.81466 | 0.00055 |
| ENST00000512250 | ENSG00000173868 | PHOSPHO1 | 17:47300723-47308128 | Protein_coding_from_Ensembl | 7.98727 | 3.89309 | 0.0061 |
| ENST00000540038 | ENSG00000173875 | ZNF791 | 19:12490002-12750912 | Protein_coding_from_Ensembl | 1.6773 | 3.71933 | 0.00085 |
| ENST00000484068 | ENSG00000173889 | PHC3 | 3:169804519-169899537 | Protein_coding_from_Ensembl | 3.2483 | 1.02152 | 0.01885 |
| ENST00000339142 | ENSG00000173918 | C1QTNF1 | 17:77015290-77045870 | Protein_coding_from_Ensembl | 0.99158 | 1.99549 | 0.00265 |
| ENST00000535664 | ENSG00000174099 | MSRB3 | 12:65672422-66057079 | Protein_coding_from_Ensembl | 0.455233 | 1.84454 | 0.04305 |
| ENST00000540804 | ENSG00000174099 | MSRB3 | 12:65672422-66057079 | Protein_coding_from_Ensembl | 5.08953 | 1.88822 | 0.00495 |
| ENST00000426706 | ENSG00000174175 | SELP | 1:169558086-169599431 | Protein_coding_from_Ensembl | 1.94235 | 0.509314 | 0.00035 |
| ENST00000545763 | ENSG00000174197 | MGA | 15:41913421-42065278 | Protein_coding_from_Ensembl | 5.05201 | 2.42615 | 5.00E-05 |
| ENST00000219905 | ENSG00000174197 | MGA | 15:41913421-42065278 | Protein_coding_from_Ensembl | 1.51871 | 4.379 | 5.00E-05 |
| ENST00000421422 | ENSG00000174306 | ZHX3 | 20:39657457-39946312 | Protein_coding_from_Ensembl | 2.909 | 0.564229 | 5.00E-05 |
| ENST00000316634 | ENSG00000174446 | SNAPC5 | 15:66679154-66790151 | Protein_coding_from_Ensembl | 1.57579 | 3.27544 | 0.0284 |
| ENST00000528752 | ENSG00000174516 | PELI3 | 11:66234215-66313709 | Protein_coding_from_Ensembl | 0.226029 | 1.48008 | 0.00915 |
| ENST00000430466 | ENSG00000174547 | MRPL11 | 11:66202545-66234209 | Protein_coding_from_Ensembl | 2.26138 | 0.636652 | 0.0064 |
| ENST00000446189 | ENSG00000174574 | AKIRIN1 | 1:39456894-39471731 | Protein_coding_from_Ensembl | 1.3977 | 3.09329 | 0.0136 |
| ENST00000591213 | ENSG00000174652 | ZNF266 | 19:9523271-9546254 | Protein_coding_from_Ensembl | 4.63944 | 2.18848 | 0.0215 |
| ENST00000397596 | ENSG00000174775 | HRAS | 11:532241-537287 | Protein_coding_from_Ensembl | 2.40053 | 1.16477 | 0.0441 |
| ENST00000505314 | ENSG00000174780 | SRP72 | 4:57327535-57369839 | Protein_coding_from_Ensembl | 3.68713 | 1.24847 | 0.0061 |
| ENST00000506261 | ENSG00000174796 | THAP6 | 4:76404246-76475683 | Protein_coding_from_Ensembl | 3.77147 | 0.595665 | 0.01965 |
| ENST00000359461 | ENSG00000174851 | YIF1A | 11:66036003-66056641 | Protein_coding_from_Ensembl | 0.63335 | 2.09175 | 0.0315 |
| ENST00000295930 | ENSG00000174891 | RSRC1 | 3:157814947-158288858 | Protein_coding_from_Ensembl | 1.73514 | 0.252592 | 0.01675 |
| ENST00000481941 | ENSG00000174953 | DHX36 | 3:153990334-154042286 | Protein_coding_from_Ensembl | 4.84426 | 2.09362 | 5.00E-05 |
| ENST00000411742 | ENSG00000175137 | SH3BP5L | 1:249104647-249120832 | Protein_coding_from_Ensembl | 1.09748 | 2.82433 | 0.0094 |
| ENST00000549039 | ENSG00000175215 | CTDSP2 | 12:58213709-58240522 | Protein_coding_from_Ensembl | 9.43172 | 2.7789 | 0.0006 |
| ENST00000415402 | ENSG00000175216 | CKAP5 | 11:46764597-46867847 | Protein_coding_from_Ensembl | 4.85366 | 1.89257 | 5.00E-05 |
| ENST00000525680 | ENSG00000175274 | TP53I11 | 11:44740941-44972840 | Protein_coding_from_Ensembl | 8.17898 | 3.34899 | 5.00E-05 |
| ENST00000520755 | ENSG00000175324 | LSM1 | 8:37962759-38070819 | Protein_coding_from_Ensembl | 0.7282 | 2.361 | 0.02735 |
| ENST00000525069 | ENSG00000175348 | TMEM9B | 11:8968840-9000466 | Protein_coding_from_Ensembl | 0.408957 | 1.42747 | 0.03325 |
| ENST00000591497 | ENSG00000175354 | PTPN2 | 18:12785476-12929642 | Protein_coding_from_Ensembl | 0.305708 | 0.79762 | 0.01595 |
| ENST00000527249 | ENSG00000175376 | EIF1AD | 11:65764015-65771620 | Protein_coding_from_Ensembl | 0.631734 | 2.67009 | 0.03065 |
| ENST00000532933 | ENSG00000175550 | DRAP1 | 11:65686727-65689032 | Protein_coding_from_Ensembl | 7.59896 | 3.18364 | 0.0032 |
| ENST00000371628 | ENSG00000175556 | LONRF3 | X:118108580-118152318 | Protein_coding_from_Ensembl | 0.419054 | 0.881585 | 0.0498 |
| ENST00000376384 | ENSG00000175575 | PAAF1 | 11:73583711-73638790 | Protein_coding_from_Ensembl | 2.58349 | 0.0563738 | 0.0323 |
| ENST00000310571 | ENSG00000175575 | PAAF1 | 11:73583711-73638790 | Protein_coding_from_Ensembl | 0.679353 | 3.75956 | 0.00035 |
| ENST00000310614 | ENSG00000175581 | MRPL48 | 11:73498360-73576178 | Protein_coding_from_Ensembl | 1.25597 | 0.39492 | 0.0437 |
| ENST00000314282 | ENSG00000175581 | MRPL48 | 11:73498360-73576178 | Protein_coding_from_Ensembl | 1.22163 | 0.595799 | 0.0458 |
| ENST00000373776 | ENSG00000175764 | TTLL11 | 9:124584206-124855885 | Protein_coding_from_Ensembl | 1.47933 | 0.649988 | 0.01565 |
| ENST00000317173 | ENSG00000175806 | MSRA | 8:9911777-10286401 | Protein_coding_from_Ensembl | 3.50629 | 1.74706 | 0.00485 |
| ENST00000428708 | ENSG00000175866 | BAIAP2 | 17:78234664-79329659 | Protein_coding_from_Ensembl | 4.0042 | 0.682563 | 0.00255 |
| ENST00000591208 | ENSG00000176014 | TUBB6 | 18:12307667-12377313 | Protein_coding_from_Ensembl | 3.05399 | 1.50307 | 0.0117 |
| ENST00000320431 | ENSG00000176020 | AMIGO3 | 3:49711434-49823975 | Protein_coding_from_Ensembl | 0.912349 | 0.423379 | 0.03665 |
| ENST00000395238 | ENSG00000176095 | IP6K1 | 3:49711434-49823975 | Protein_coding_from_Ensembl | 0.981786 | 3.5187 | 5.00E-05 |
| ENST00000431742 | ENSG00000176102 | CSTF3 | 11:33060962-33213144 | Protein_coding_from_Ensembl | 1.0618 | 3.81404 | 0.02275 |
| ENST00000437017 | ENSG00000176225 | RTTN | 18:67671028-67874456 | Protein_coding_from_Ensembl | 0.878502 | 0.407049 | 0.00535 |
| ENST00000313434 | ENSG00000176293 | ZNF135 | 19:58570606-58629794 | Protein_coding_from_Ensembl | 2.62932 | 0.645985 | 5.00E-05 |
| ENST00000439855 | ENSG00000176293 | ZNF135 | 19:58570606-58629794 | Protein_coding_from_Ensembl | 0.32122 | 0.984089 | 0.03295 |
| ENST00000546949 | ENSG00000176593 | CTD-2368P22.1 | 19:58488420-58537294 | Protein_coding_from_Ensembl | 1.4187 | 0.690275 | 0.0221 |
| ENST00000394775 | ENSG00000176714 | CCDC121 | 2:27805896-27917840 | Protein_coding_from_Ensembl | 0.519293 | 1.44241 | 0.0357 |
| ENST00000406948 | ENSG00000176715 | ACSF3 | 16:89154782-89222254 | Protein_coding_from_Ensembl | 1.46696 | 3.28585 | 0.0005 |
| ENST00000437570 | ENSG00000176783 | RUFY1 | 5:178977558-179037027 | Protein_coding_from_Ensembl | 0.793854 | 2.81379 | 5.00E-05 |
| ENST00000317479 | ENSG00000176894 | PXMP2 | 12:133264191-133299228 | Protein_coding_from_Ensembl | 3.40082 | 1.56665 | 0.0218 |
| ENST00000316409 | ENSG00000176973 | FAM89B | 11:65333532-65341669 | Protein_coding_from_Ensembl | 1.68337 | 0.824072 | 0.04995 |
| ENST00000449319 | ENSG00000176973 | FAM89B | 11:65333532-65341669 | Protein_coding_from_Ensembl | 1.71744 | 3.47515 | 0.00775 |
| ENST00000354098 | ENSG00000176974 | SHMT1 | 17:17991199-18266856 | Protein_coding_from_Ensembl | 0.88775 | 2.41931 | 0.0134 |
| ENST00000376583 | ENSG00000177000 | MTHFR | 1:11821843-11908402 | Protein_coding_from_Ensembl | 0.458622 | 3.29385 | 5.00E-05 |
| ENST00000560168 | ENSG00000177045 | SIX5 | 19:46268042-46296060 | Protein_coding_from_Ensembl | 0.462583 | 1.17406 | 0.0316 |
| ENST00000515629 | ENSG00000177058 | SLC38A9 | 5:54921672-55112985 | Protein_coding_from_Ensembl | 1.27451 | 0.575884 | 0.01055 |
| ENST00000425752 | ENSG00000177119 | ANO6 | 12:45566846-45834187 | Protein_coding_from_Ensembl | 0.883277 | 0.419098 | 0.023 |
| ENST00000319119 | ENSG00000177125 | ZBTB34 | 9:129622943-129648157 | Protein_coding_from_Ensembl | 3.96817 | 1.62496 | 5.00E-05 |
| ENST00000373452 | ENSG00000177125 | ZBTB34 | 9:129622943-129648157 | Protein_coding_from_Ensembl | 0.323339 | 2.47866 | 5.00E-05 |
| ENST00000411955 | ENSG00000177409 | SAMD9L | 7:92759367-92777682 | Protein_coding_from_Ensembl | 0.119449 | 1.73739 | 5.00E-05 |
| ENST00000544477 | ENSG00000177548 | RABEP2 | 16:28889725-28950667 | Protein_coding_from_Ensembl | 1.63172 | 4.05713 | 0.00035 |
| ENST00000411829 | ENSG00000177595 | PIDD | 11:799178-812880 | Protein_coding_from_Ensembl | 0.223162 | 1.22028 | 0.0109 |
| ENST00000327247 | ENSG00000177628 | GBA | 1:155204242-155214490 | Protein_coding_from_Ensembl | 1.38304 | 0.483462 | 0.0071 |
| ENST00000416109 | ENSG00000177675 | CD163L1 | 12:7499280-7656489 | Protein_coding_from_Ensembl | 1.25261 | 2.76668 | 5.00E-05 |
| ENST00000313516 | ENSG00000177683 | THAP5 | 7:108110865-108215294 | Protein_coding_from_Ensembl | 2.68709 | 0.896836 | 0.0027 |
| ENST00000493615 | ENSG00000177707 | PVRL3 | 3:110607230-110994410 | Protein_coding_from_Ensembl | 1.13961 | 2.34786 | 0.0111 |
| ENST00000528581 | ENSG00000177830 | CHID1 | 11:867356-915058 | Protein_coding_from_Ensembl | 0.226507 | 1.45227 | 0.04645 |
| ENST00000449825 | ENSG00000177830 | CHID1 | 11:867356-915058 | Protein_coding_from_Ensembl | 1.06257 | 2.14129 | 0.0007 |
| ENST00000418905 | ENSG00000177842 | ZNF620 | 3:40547482-40560227 | Protein_coding_from_Ensembl | 1.17175 | 0.421546 | 0.02515 |
| ENST00000582582 | ENSG00000177885 | GRB2 | 17:73314156-73401790 | Protein_coding_from_Ensembl | 2.51505 | 9.42802 | 0.0026 |
| ENST00000372289 | ENSG00000178028 | DMAP1 | 1:44679126-44686353 | Protein_coding_from_Ensembl | 2.10811 | 0.554018 | 0.0057 |
| ENST00000446292 | ENSG00000178028 | DMAP1 | 1:44679126-44686353 | Protein_coding_from_Ensembl | 0.732174 | 3.10488 | 0.00725 |
| ENST00000276935 | ENSG00000178031 | ADAMTSL1 | 9:18473891-18910948 | Protein_coding_from_Ensembl | 0.585948 | 1.48143 | 0.00515 |
| ENST00000369356 | ENSG00000178104 | PDE4DIP | 1:143647637-149154987 | Protein_coding_from_Ensembl | 1.79504 | 4.25158 | 5.00E-05 |
| ENST00000320129 | ENSG00000178187 | ZNF454 | 5:178368191-178393434 | Protein_coding_from_Ensembl | 1.73016 | 0.735209 | 0.00465 |
| ENST00000519564 | ENSG00000178187 | ZNF454 | 5:178368191-178393434 | Protein_coding_from_Ensembl | 0.794804 | 2.33546 | 0.00145 |
| ENST00000395532 | ENSG00000178188 | SH2B1 | 16:28857920-28885526 | Protein_coding_from_Ensembl | 0.208392 | 1.33548 | 0.00775 |
| ENST00000389942 | ENSG00000178199 | ZC3H12D | 6:149768793-149806197 | Protein_coding_from_Ensembl | 0.840929 | 0.263822 | 0.01685 |
| ENST00000434945 | ENSG00000178202 | KDELC2 | 11:108342831-108373612 | Protein_coding_from_Ensembl | 0.301321 | 1.66755 | 0.0002 |
| ENST00000357649 | ENSG00000178209 | PLEC | 8:144989320-145050902 | Protein_coding_from_Ensembl | 3.08936 | 0.732773 | 5.00E-05 |
| ENST00000356346 | ENSG00000178209 | PLEC | 8:144989320-145050902 | Protein_coding_from_Ensembl | 4.58079 | 2.26064 | 5.00E-05 |
| ENST00000317635 | ENSG00000178307 | TMEM11 | 17:21100592-21133348 | Protein_coding_from_Ensembl | 0.534353 | 1.10003 | 0.0462 |
| ENST00000520377 | ENSG00000178338 | ZNF354B | 5:178107231-178368084 | Protein_coding_from_Ensembl | 0.954613 | 2.68713 | 0.03135 |
| ENST00000458610 | ENSG00000178562 | CD28 | 2:204571197-204603635 | Protein_coding_from_Ensembl | 0.912322 | 3.10938 | 0.02255 |
| ENST00000537447 | ENSG00000178585 | CTNNBIP1 | 1:9908333-9970394 | Protein_coding_from_Ensembl | 0.639613 | 1.64361 | 0.02415 |
| ENST00000313269 | ENSG00000178719 | GRINA | 8:145051320-145101933 | Protein_coding_from_Ensembl | 4.11869 | 1.76216 | 0.0001 |
| ENST00000563422 | ENSG00000178802 | MPI | 15:75182345-75191798 | Protein_coding_from_Ensembl | 0.558587 | 1.8993 | 0.0109 |
| ENST00000546355 | ENSG00000178882 | FAM101A | 12:124247041-124800570 | Protein_coding_from_Ensembl | 1.84009 | 4.35162 | 0.0001 |
| ENST00000372432 | ENSG00000178922 | HYI | 1:43855552-43922666 | Protein_coding_from_Ensembl | 4.26412 | 2.08703 | 0.01455 |
| ENST00000306645 | ENSG00000178927 | C17orf62 | 17:80347085-80408707 | Protein_coding_from_Ensembl | 0.610695 | 6.07157 | 5.00E-05 |
| ENST00000502656 | ENSG00000178950 | GAK | 4:843063-926161 | Protein_coding_from_Ensembl | 2.0966 | 5.17814 | 0.03865 |
| ENST00000593892 | ENSG00000178980 | SEPW1 | 19:48281828-48287943 | Protein_coding_from_Ensembl | 2.30266 | 5.73301 | 0.0351 |
| ENST00000538434 | ENSG00000178982 | EIF3K | 19:39109734-39127595 | Protein_coding_from_Ensembl | 2.77395 | 0.621389 | 0.01625 |
| ENST00000545173 | ENSG00000178982 | EIF3K | 19:39109734-39127595 | Protein_coding_from_Ensembl | 0.416551 | 1.54488 | 0.0185 |
| ENST00000549919 | ENSG00000179104 | TMTC2 | 12:83080658-83528649 | Protein_coding_from_Ensembl | 0.570805 | 1.22892 | 0.00065 |
| ENST00000568176 | ENSG00000179151 | EDC3 | 15:74890840-74988633 | Protein_coding_from_Ensembl | 0.762349 | 2.26086 | 0.003 |
| ENST00000539644 | ENSG00000179195 | ZNF664 | 12:124247041-124800570 | Protein_coding_from_Ensembl | 1.44061 | 0.441069 | 0.0002 |
| ENST00000586760 | ENSG00000179218 | CALR | 19:13049391-13055303 | Protein_coding_from_Ensembl | 2.06298 | 4.55502 | 0.02395 |
| ENST00000586534 | ENSG00000179262 | RAD23A | 19:13056668-13064456 | Protein_coding_from_Ensembl | 7.77252 | 3.79753 | 5.00E-05 |
| ENST00000395066 | ENSG00000179335 | CLK3 | 15:74890840-74988633 | Protein_coding_from_Ensembl | 1.61183 | 0.501819 | 0.00345 |
| ENST00000487848 | ENSG00000179348 | GATA2 | 3:128198269-128221191 | Protein_coding_from_Ensembl | 0.798727 | 1.70736 | 0.01965 |
| ENST00000325438 | ENSG00000179364 | PACS2 | 14:105675622-105864484 | Protein_coding_from_Ensembl | 4.50397 | 1.32306 | 5.00E-05 |
| ENST00000547217 | ENSG00000179364 | PACS2 | 14:105675622-105864484 | Protein_coding_from_Ensembl | 0.153231 | 3.88601 | 0.00625 |
| ENST00000428042 | ENSG00000179397 | C1orf101 | 1:244617678-244804479 | Protein_coding_from_Ensembl | 1.07786 | 0.20854 | 0.00515 |
| ENST00000527990 | ENSG00000179532 | DNHD1 | 11:6502676-6614988 | Protein_coding_from_Ensembl | 0.837335 | 0.178083 | 5.00E-05 |
| ENST00000321560 | ENSG00000179598 | PLD6 | 17:16945858-17140502 | Protein_coding_from_Ensembl | 0.497148 | 1.37413 | 0.0167 |
| ENST00000532522 | ENSG00000179632 | MAF1 | 8:145153535-145173218 | Protein_coding_from_Ensembl | 3.69838 | 0.488535 | 0.01095 |
| ENST00000539168 | ENSG00000179776 | CDH5 | 16:66400532-66438686 | Protein_coding_from_Ensembl | 1.82666 | 0.621155 | 0.01495 |
| ENST00000448420 | ENSG00000179820 | MYADM | 19:54357326-54379691 | Protein_coding_from_Ensembl | 2.06092 | 6.44821 | 0.00185 |
| ENST00000478753 | ENSG00000179918 | SEPHS2 | 16:30454951-30457502 | Protein_coding_from_Ensembl | 5.28595 | 2.45475 | 5.00E-05 |
| ENST00000456095 | ENSG00000179950 | PUF60 | 8:144898513-144912029 | Protein_coding_from_Ensembl | 4.68363 | 1.39339 | 0.0001 |
| ENST00000453551 | ENSG00000179950 | PUF60 | 8:144898513-144912029 | Protein_coding_from_Ensembl | 1.04539 | 4.81334 | 5.00E-05 |
| ENST00000411533 | ENSG00000180198 | RCC1 | 1:28832454-28865812 | Protein_coding_from_Ensembl | 0.627986 | 2.02738 | 0.0293 |
| ENST00000400590 | ENSG00000180776 | ZDHHC20 | 13:21870425-22034752 | Protein_coding_from_Ensembl | 0.765072 | 2.01567 | 0.00705 |
| ENST00000564043 | ENSG00000181019 | NQO1 | 16:69740898-69760854 | Protein_coding_from_Ensembl | 0.761069 | 2.74967 | 0.02795 |
| ENST00000546047 | ENSG00000181045 | SLC26A11 | 17:78143790-78227299 | Protein_coding_from_Ensembl | 2.89982 | 0.695903 | 5.00E-05 |
| ENST00000361193 | ENSG00000181045 | SLC26A11 | 17:78143790-78227299 | Protein_coding_from_Ensembl | 1.51848 | 3.32501 | 0.00015 |
| ENST00000374583 | ENSG00000181191 | PJA1 | X:68380693-68385636 | Protein_coding_from_Ensembl | 2.75708 | 0.608401 | 5.00E-05 |
| ENST00000458143 | ENSG00000181220 | ZNF746 | 7:149169884-149194908 | Protein_coding_from_Ensembl | 2.75947 | 1.28389 | 5.00E-05 |
| ENST00000340622 | ENSG00000181220 | ZNF746 | 7:149169884-149194908 | Protein_coding_from_Ensembl | 0.8513 | 3.35727 | 5.00E-05 |
| ENST00000313056 | ENSG00000181396 | OGFOD3 | 17:80347085-80408707 | Protein_coding_from_Ensembl | 0.335486 | 1.46915 | 0.0001 |
| ENST00000577495 | ENSG00000181396 | OGFOD3 | 17:80347085-80408707 | Protein_coding_from_Ensembl | 5.56191 | 1.57847 | 0.00215 |
| ENST00000392153 | ENSG00000181666 | HKR1 | 19:37803738-37860267 | Protein_coding_from_Ensembl | 3.60514 | 0.282353 | 0.00015 |
| ENST00000495414 | ENSG00000181744 | C3orf58 | 3:143690639-143767561 | Protein_coding_from_Ensembl | 1.9558 | 0.544564 | 0.0064 |
| ENST00000559447 | ENSG00000181827 | RFX7 | 15:56379477-56535483 | Protein_coding_from_Ensembl | 1.82205 | 0.144639 | 0.00015 |
| ENST00000435259 | ENSG00000181904 | C5orf24 | 5:134094468-134195427 | Protein_coding_from_Ensembl | 1.5286 | 3.53385 | 0.02555 |
| ENST00000552212 | ENSG00000181929 | PRKAG1 | 12:49388931-49453557 | Protein_coding_from_Ensembl | 4.05391 | 1.53227 | 0.00135 |
| ENST00000539790 | ENSG00000182054 | IDH2 | 15:90626276-90645736 | Protein_coding_from_Ensembl | 3.50081 | 1.51526 | 0.0046 |
| ENST00000592590 | ENSG00000182087 | TMEM259 | 19:999600-1021117 | Protein_coding_from_Ensembl | 0.788913 | 4.31524 | 0.0145 |
| ENST00000557301 | ENSG00000182175 | RGMA | 15:93586635-93632433 | Protein_coding_from_Ensembl | 2.12668 | 0.343417 | 0.00535 |
| ENST00000542321 | ENSG00000182175 | RGMA | 15:93586635-93632433 | Protein_coding_from_Ensembl | 1.05437 | 2.14327 | 0.0012 |
| ENST00000487270 | ENSG00000182185 | RAD51B | 14:68286495-69196935 | Protein_coding_from_Ensembl | 1.57044 | 0.763007 | 0.01065 |
| ENST00000427385 | ENSG00000182389 | CACNB4 | 2:152689289-152965716 | Protein_coding_from_Ensembl | 1.63864 | 0.596303 | 0.0137 |
| ENST00000450438 | ENSG00000182511 | FES | 15:91411821-91579841 | Protein_coding_from_Ensembl | 0.193988 | 1.69276 | 0.01875 |
| ENST00000553525 | ENSG00000182732 | RGS6 | 14:72399155-73061833 | Protein_coding_from_Ensembl | 0.448911 | 1.17489 | 0.02425 |
| ENST00000329146 | ENSG00000182809 | CRIP2 | 14:105939274-105946507 | Protein_coding_from_Ensembl | 2.22275 | 5.40005 | 5.00E-05 |
| ENST00000377801 | ENSG00000182836 | PLCXD3 | 5:41307055-41510730 | Protein_coding_from_Ensembl | 1.66531 | 0.372915 | 5.00E-05 |
| ENST00000533154 | ENSG00000182919 | C11orf54 | 11:93394804-93547861 | Protein_coding_from_Ensembl | 2.3985 | 0.729584 | 0.03875 |
| ENST00000532259 | ENSG00000182934 | SRPR | 11:126071992-126148027 | Protein_coding_from_Ensembl | 0.501814 | 4.44098 | 5.00E-05 |
| ENST00000437155 | ENSG00000182944 | EWSR1 | 22:29655840-29696515 | Protein_coding_from_Ensembl | 2.4186 | 0.692432 | 0.0383 |
| ENST00000587113 | ENSG00000182963 | GJC1 | 17:42875815-42908184 | Protein_coding_from_Ensembl | 0.252 | 0.881797 | 0.0115 |
| ENST00000538368 | ENSG00000182973 | CNOT10 | 3:32726636-32815367 | Protein_coding_from_Ensembl | 0.990748 | 0.15471 | 0.0171 |
| ENST00000328834 | ENSG00000182973 | CNOT10 | 3:32726636-32815367 | Protein_coding_from_Ensembl | 4.84455 | 0.600619 | 5.00E-05 |
| ENST00000331889 | ENSG00000182973 | CNOT10 | 3:32726636-32815367 | Protein_coding_from_Ensembl | 0.374164 | 5.53005 | 0.0001 |
| ENST00000405646 | ENSG00000182979 | MTA1 | 14:105864915-105937066 | Protein_coding_from_Ensembl | 2.45058 | 0.71152 | 5.00E-05 |
| ENST00000498644 | ENSG00000182979 | MTA1 | 14:105864915-105937066 | Protein_coding_from_Ensembl | 0.353388 | 1.71931 | 0.048 |
| ENST00000405481 | ENSG00000183010 | PYCR1 | 17:79890259-79905501 | Protein_coding_from_Ensembl | 3.51285 | 1.57623 | 0.0258 |
| ENST00000329875 | ENSG00000183010 | PYCR1 | 17:79890259-79905501 | Protein_coding_from_Ensembl | 4.31094 | 2.0803 | 0.00095 |
| ENST00000575771 | ENSG00000183011 | LSMD1 | 17:7760002-7816078 | Protein_coding_from_Ensembl | 3.57521 | 7.22462 | 0.01615 |
| ENST00000576861 | ENSG00000183011 | LSMD1 | 17:7760002-7816078 | Protein_coding_from_Ensembl | 2.60032 | 9.15761 | 0.0105 |
| ENST00000359793 | ENSG00000183137 | CEP57L1 | 6:109416312-109485135 | Protein_coding_from_Ensembl | 0.881241 | 1.82279 | 0.00515 |
| ENST00000601968 | ENSG00000183207 | RUVBL2 | 19:49496704-49520338 | Protein_coding_from_Ensembl | 2.04932 | 0.539846 | 0.005 |
| ENST00000396496 | ENSG00000183323 | CCDC125 | 5:68576001-68628636 | Protein_coding_from_Ensembl | 0.546604 | 1.36336 | 0.0004 |
| ENST00000397354 | ENSG00000183337 | BCOR | X:39909067-40036582 | Protein_coding_from_Ensembl | 0.937597 | 0.408498 | 0.0012 |
| ENST00000381461 | ENSG00000183354 | KIAA2026 | 9:5881595-6007904 | Protein_coding_from_Ensembl | 3.74279 | 1.77839 | 5.00E-05 |
| ENST00000329797 | ENSG00000183484 | GPR132 | 14:105515727-105531782 | Protein_coding_from_Ensembl | 0.320949 | 1.46676 | 5.00E-05 |
| ENST00000330386 | ENSG00000183495 | EP400 | 12:132434507-132565005 | Protein_coding_from_Ensembl | 0.80722 | 2.07144 | 5.00E-05 |
| ENST00000327374 | ENSG00000183597 | TANGO2 | 22:19863039-20058066 | Protein_coding_from_Ensembl | 1.12233 | 3.09545 | 0.0004 |
| ENST00000355697 | ENSG00000183605 | SFXN4 | 10:120900278-120925179 | Protein_coding_from_Ensembl | 1.20138 | 2.94036 | 0.0053 |
| ENST00000436087 | ENSG00000183621 | ZNF438 | 10:31109135-31320866 | Protein_coding_from_Ensembl | 0.240143 | 1.12813 | 0.0026 |
| ENST00000375311 | ENSG00000183621 | ZNF438 | 10:31109135-31320866 | Protein_coding_from_Ensembl | 1.2197 | 3.81925 | 5.00E-05 |
| ENST00000403056 | ENSG00000183826 | BTBD9 | 6:38136226-38607924 | Protein_coding_from_Ensembl | 4.54504 | 1.45274 | 5.00E-05 |
| ENST00000408958 | ENSG00000183826 | BTBD9 | 6:38136226-38607924 | Protein_coding_from_Ensembl | 0.86568 | 4.05372 | 0.00015 |
| ENST00000535906 | ENSG00000184056 | VPS33B | 15:91411821-91579841 | Protein_coding_from_Ensembl | 0.17327 | 1.071 | 0.0245 |
| ENST00000272930 | ENSG00000184182 | UBE2F | 2:238875468-239008054 | Protein_coding_from_Ensembl | 2.05167 | 0.54406 | 0.00205 |
| ENST00000438848 | ENSG00000184203 | PPP1R2 | 3:195241220-195270209 | Protein_coding_from_Ensembl | 2.35659 | 6.4588 | 0.00255 |
| ENST00000579390 | ENSG00000184205 | TSPYL2 | X:53111548-53117722 | Protein_coding_from_Ensembl | 1.74211 | 3.84439 | 0.02295 |
| ENST00000369974 | ENSG00000184216 | IRAK1 | X:153275950-153285440 | Protein_coding_from_Ensembl | 2.87835 | 1.17391 | 0.0002 |
| ENST00000544246 | ENSG00000184226 | PCDH9 | 13:66876966-67804468 | Protein_coding_from_Ensembl | 0.865555 | 0.406877 | 0.00265 |
| ENST00000415220 | ENSG00000184304 | PRKD1 | 14:30045686-30766249 | Protein_coding_from_Ensembl | 3.03558 | 1.13519 | 5.00E-05 |
| ENST00000333691 | ENSG00000184305 | CCSER1 | 4:91048685-92523064 | Protein_coding_from_Ensembl | 0.116407 | 1.01104 | 0.0162 |
| ENST00000420111 | ENSG00000184371 | CSF1 | 1:110452863-110473614 | Protein_coding_from_Ensembl | 2.44948 | 1.07604 | 0.03525 |
| ENST00000523676 | ENSG00000184428 | TOP1MT | 8:144386553-144442149 | Protein_coding_from_Ensembl | 0.285183 | 0.922331 | 0.0368 |
| ENST00000420344 | ENSG00000184465 | WDR27 | 6:169857306-170102159 | Protein_coding_from_Ensembl | 1.86047 | 0.658957 | 0.01755 |
| ENST00000333572 | ENSG00000184465 | WDR27 | 6:169857306-170102159 | Protein_coding_from_Ensembl | 0.631148 | 1.49321 | 0.00245 |
| ENST00000520105 | ENSG00000184489 | PTP4A3 | 8:142400038-142441620 | Protein_coding_from_Ensembl | 0.274164 | 1.23244 | 0.0331 |
| ENST00000521578 | ENSG00000184489 | PTP4A3 | 8:142400038-142441620 | Protein_coding_from_Ensembl | 0.376248 | 1.86896 | 0.00875 |
| ENST00000559898 | ENSG00000184508 | HDDC3 | 15:91411821-91579841 | Protein_coding_from_Ensembl | 2.77358 | 0.848132 | 0.0232 |
| ENST00000570010 | ENSG00000184517 | ZFP1 | 16:75182389-75206134 | Protein_coding_from_Ensembl | 0.358014 | 1.53458 | 0.03035 |
| ENST00000431922 | ENSG00000184574 | LPAR5 | 12:6728000-6745613 | Protein_coding_from_Ensembl | 1.19242 | 0.431109 | 0.00835 |
| ENST00000329858 | ENSG00000184574 | LPAR5 | 12:6728000-6745613 | Protein_coding_from_Ensembl | 0.334378 | 1.00097 | 0.01005 |
| ENST00000400935 | ENSG00000184575 | XPOT | 12:64798129-64844907 | Protein_coding_from_Ensembl | 4.1881 | 1.96517 | 0.0142 |
| ENST00000427180 | ENSG00000184640 | 9-Sep | 17:75249855-75496678 | Protein_coding_from_Ensembl | 2.03431 | 0.628959 | 5.00E-05 |
| ENST00000590294 | ENSG00000184640 | 9-Sep | 17:75249855-75496678 | Protein_coding_from_Ensembl | 8.22173 | 2.36053 | 5.00E-05 |
| ENST00000590825 | ENSG00000184640 | 9-Sep | 17:75249855-75496678 | Protein_coding_from_Ensembl | 4.04142 | 8.86699 | 0.0168 |
| ENST00000374651 | ENSG00000184677 | ZBTB40 | 1:22778343-22857650 | Protein_coding_from_Ensembl | 0.0746995 | 0.960593 | 0.00735 |
| ENST00000412544 | ENSG00000184702 | 5-Sep | 22:19696582-19712297 | Protein_coding_from_Ensembl | 1.47423 | 5.92527 | 0.00035 |
| ENST00000331772 | ENSG00000184719 | RNLS | 10:90033620-90344727 | Protein_coding_from_Ensembl | 1.46346 | 0.450785 | 0.02495 |
| ENST00000330942 | ENSG00000184787 | UBE2G2 | 21:46188954-46221934 | Protein_coding_from_Ensembl | 3.31495 | 0.741251 | 0.03135 |
| ENST00000330154 | ENSG00000184867 | ARMCX2 | X:100910266-100914876 | Protein_coding_from_Ensembl | 2.84033 | 6.33437 | 5.00E-05 |
| ENST00000463376 | ENSG00000184887 | BTBD6 | 14:105675622-105864484 | Protein_coding_from_Ensembl | 0.729844 | 1.8488 | 0.0067 |
| ENST00000347004 | ENSG00000184916 | JAG2 | 14:105607317-105647660 | Protein_coding_from_Ensembl | 0.234514 | 1.09639 | 0.0003 |
| ENST00000328379 | ENSG00000184924 | PTRHD1 | 2:25012602-25142708 | Protein_coding_from_Ensembl | 0.836892 | 2.53174 | 0.01325 |
| ENST00000563169 | ENSG00000184939 | ZFP90 | 16:68563992-68623415 | Protein_coding_from_Ensembl | 1.13898 | 3.56706 | 5.00E-05 |
| ENST00000538784 | ENSG00000184967 | NOC4L | 12:132628992-132637013 | Protein_coding_from_Ensembl | 0.235535 | 1.9819 | 0.04815 |
| ENST00000348031 | ENSG00000185019 | UBOX5 | 20:3086681-3140842 | Protein_coding_from_Ensembl | 2.55171 | 0.399356 | 5.00E-05 |
| ENST00000411539 | ENSG00000185033 | SEMA4B | 15:90703835-90772911 | Protein_coding_from_Ensembl | 2.83218 | 1.34076 | 5.00E-05 |
| ENST00000332496 | ENSG00000185033 | SEMA4B | 15:90703835-90772911 | Protein_coding_from_Ensembl | 0.35283 | 2.28278 | 5.00E-05 |
| ENST00000549866 | ENSG00000185046 | ANKS1B | 12:99038918-100378432 | Protein_coding_from_Ensembl | 0.904978 | 0.322444 | 0.0403 |
| ENST00000329257 | ENSG00000185046 | ANKS1B | 12:99038918-100378432 | Protein_coding_from_Ensembl | 0.421729 | 0.881506 | 0.0178 |
| ENST00000462430 | ENSG00000185088 | RPS27L | 15:63413998-63450220 | Protein_coding_from_Ensembl | 15.3483 | 6.66791 | 0.0001 |
| ENST00000543378 | ENSG00000185158 | LRRC37B | 17:30334890-30380523 | Protein_coding_from_Ensembl | 0.414904 | 1.02308 | 0.01245 |
| ENST00000381474 | ENSG00000185164 | NOMO2 | 16:18511181-18573533 | Protein_coding_from_Ensembl | 0.746578 | 3.7306 | 5.00E-05 |
| ENST00000526395 | ENSG00000185187 | SIGIRR | 11:405715-417455 | Protein_coding_from_Ensembl | 4.15503 | 1.36089 | 0.0284 |
| ENST00000559255 | ENSG00000185215 | TNFAIP2 | 14:103589778-103603776 | Protein_coding_from_Ensembl | 2.97353 | 0.682937 | 0.00335 |
| ENST00000355765 | ENSG00000185246 | PRPF39 | 14:45553301-45604522 | Protein_coding_from_Ensembl | 1.75621 | 3.62015 | 5.00E-05 |
| ENST00000367704 | ENSG00000185278 | ZBTB37 | 1:173768687-173872687 | Protein_coding_from_Ensembl | 0.837119 | 0.243223 | 0.0404 |
| ENST00000507646 | ENSG00000185305 | ARL15 | 5:53179774-53606412 | Protein_coding_from_Ensembl | 15.0712 | 1.05386 | 0.0033 |
| ENST00000405742 | ENSG00000185339 | TCN2 | 22:30972611-31023265 | Protein_coding_from_Ensembl | 1.97166 | 4.53076 | 5.00E-05 |
| ENST00000360113 | ENSG00000185340 | GAS2L1 | 22:29702571-29708774 | Protein_coding_from_Ensembl | 1.06533 | 0.301716 | 0.0122 |
| ENST00000403764 | ENSG00000185340 | GAS2L1 | 22:29702571-29708774 | Protein_coding_from_Ensembl | 0.889835 | 2.73495 | 0.00015 |
| ENST00000571237 | ENSG00000185359 | HGS | 17:79648203-79670330 | Protein_coding_from_Ensembl | 2.95906 | 1.42354 | 0.0485 |
| ENST00000403792 | ENSG00000185420 | SMYD3 | 1:245912641-246670614 | Protein_coding_from_Ensembl | 2.27012 | 0.861826 | 0.0205 |
| ENST00000358383 | ENSG00000185480 | PARPBP | 12:102513955-102591623 | Protein_coding_from_Ensembl | 0.950241 | 0.151917 | 0.0458 |
| ENST00000545203 | ENSG00000185483 | ROR1 | 1:64239692-64647181 | Protein_coding_from_Ensembl | 1.25322 | 0.614183 | 0.01915 |
| ENST00000397562 | ENSG00000185507 | IRF7 | 11:612552-615999 | Protein_coding_from_Ensembl | 1.40978 | 0.376905 | 0.01775 |
| ENST00000373976 | ENSG00000185532 | PRKG1 | 10:52750728-54185175 | Protein_coding_from_Ensembl | 1.49719 | 4.90533 | 0.0262 |
| ENST00000576541 | ENSG00000185624 | P4HB | 17:79801034-79820377 | Protein_coding_from_Ensembl | 2.92396 | 6.41476 | 0.0429 |
| ENST00000392352 | ENSG00000185684 | EP400NL | 12:132568827-132615587 | Protein_coding_from_Ensembl | 0.849328 | 0.190277 | 0.04485 |
| ENST00000376625 | ENSG00000185684 | EP400NL | 12:132568827-132615587 | Protein_coding_from_Ensembl | 0.321789 | 0.834037 | 0.0135 |
| ENST00000524176 | ENSG00000185697 | MYBL1 | 8:67474409-67526482 | Protein_coding_from_Ensembl | 1.29928 | 0.594038 | 0.02805 |
| ENST00000570535 | ENSG00000185722 | ANKFY1 | 17:3617921-4269923 | Protein_coding_from_Ensembl | 2.22487 | 0.586367 | 5.00E-05 |
| ENST00000377735 | ENSG00000185800 | DMWD | 19:46268042-46296060 | Protein_coding_from_Ensembl | 1.29191 | 2.8415 | 0.00015 |
| ENST00000399103 | ENSG00000185808 | PIGP | 21:38431469-38445470 | Protein_coding_from_Ensembl | 4.26817 | 2.03475 | 0.04675 |
| ENST00000331340 | ENSG00000185811 | IKZF1 | 7:50343719-50472799 | Protein_coding_from_Ensembl | 1.19406 | 0.0814023 | 0.00135 |
| ENST00000458587 | ENSG00000185825 | BCAP31 | X:152965946-152990152 | Protein_coding_from_Ensembl | 2.7399 | 1.18535 | 0.0028 |
| ENST00000400952 | ENSG00000185842 | DNAH14 | 1:225083963-225586996 | Protein_coding_from_Ensembl | 1.04773 | 0.208147 | 0.03025 |
| ENST00000366850 | ENSG00000185842 | DNAH14 | 1:225083963-225586996 | Protein_coding_from_Ensembl | 1.89471 | 0.567714 | 0.0273 |
| ENST00000524413 | ENSG00000185875 | THNSL1 | 10:25305586-25315593 | Protein_coding_from_Ensembl | 2.1963 | 0.842506 | 5.00E-05 |
| ENST00000424303 | ENSG00000185917 | SETD4 | 21:37402367-37498938 | Protein_coding_from_Ensembl | 0.418283 | 2.32905 | 0.0436 |
| ENST00000429896 | ENSG00000185920 | PTCH1 | 9:98205261-98279339 | Protein_coding_from_Ensembl | 0.3869 | 1.13102 | 5.00E-05 |
| ENST00000551845 | ENSG00000185920 | PTCH1 | 9:98205261-98279339 | Protein_coding_from_Ensembl | 3.40395 | 1.60805 | 0.04345 |
| ENST00000536618 | ENSG00000186001 | LRCH3 | 3:197518096-197615307 | Protein_coding_from_Ensembl | 0.366279 | 1.01867 | 0.0302 |
| ENST00000334859 | ENSG00000186001 | LRCH3 | 3:197518096-197615307 | Protein_coding_from_Ensembl | 4.45025 | 1.66041 | 5.00E-05 |
| ENST00000434377 | ENSG00000186017 | ZNF566 | 19:36934262-37119499 | Protein_coding_from_Ensembl | 1.3772 | 0.308968 | 5.00E-05 |
| ENST00000566621 | ENSG00000186073 | C15orf41 | 15:36871811-37110712 | Protein_coding_from_Ensembl | 0.537419 | 1.6257 | 0.0018 |
| ENST00000402655 | ENSG00000186153 | WWOX | 16:78133309-79263350 | Protein_coding_from_Ensembl | 0.688153 | 2.42932 | 0.0035 |
| ENST00000566250 | ENSG00000186187 | ZNRF1 | 16:74907467-75144892 | Protein_coding_from_Ensembl | 0.750928 | 3.05427 | 0.0072 |
| ENST00000366910 | ENSG00000186205 | 1-Mar | 1:220960100-220987735 | Protein_coding_from_Ensembl | 1.64984 | 0.266892 | 0.00775 |
| ENST00000601808 | ENSG00000186272 | ZNF17 | 19:57874844-57988938 | Protein_coding_from_Ensembl | 1.36946 | 3.24376 | 0.0004 |
| ENST00000585614 | ENSG00000186566 | GPATCH8 | 17:42472644-42580957 | Protein_coding_from_Ensembl | 1.9177 | 4.13776 | 0.0464 |
| ENST00000335647 | ENSG00000186625 | KATNA1 | 6:149916008-149970108 | Protein_coding_from_Ensembl | 0.349932 | 2.32201 | 0.00775 |
| ENST00000452383 | ENSG00000186635 | ARAP1 | 11:72396113-72505213 | Protein_coding_from_Ensembl | 3.92772 | 10.4668 | 0.0001 |
| ENST00000550785 | ENSG00000186815 | TPCN1 | 12:113633245-113736390 | Protein_coding_from_Ensembl | 1.02295 | 2.58986 | 5.00E-05 |
| ENST00000541517 | ENSG00000186815 | TPCN1 | 12:113633245-113736390 | Protein_coding_from_Ensembl | 5.95986 | 2.83399 | 5.00E-05 |
| ENST00000523095 | ENSG00000186918 | ZNF395 | 8:28203101-28347835 | Protein_coding_from_Ensembl | 1.37167 | 3.3013 | 0.0009 |
| ENST00000262735 | ENSG00000186951 | PPARA | 22:46546423-47134158 | Protein_coding_from_Ensembl | 1.09658 | 0.452267 | 0.00015 |
| ENST00000361985 | ENSG00000187079 | TEAD1 | 11:12695968-12966298 | Protein_coding_from_Ensembl | 0.89302 | 2.55035 | 5.00E-05 |
| ENST00000392901 | ENSG00000187164 | KIAA1598 | 10:118587735-118886097 | Protein_coding_from_Ensembl | 1.5342 | 0.580533 | 0.0086 |
| ENST00000334267 | ENSG00000187240 | DYNC2H1 | 11:102980159-103350591 | Protein_coding_from_Ensembl | 1.20652 | 3.21278 | 5.00E-05 |
| ENST00000536571 | ENSG00000187391 | MAGI2 | 7:77646392-79100524 | Protein_coding_from_Ensembl | 1.03642 | 0.185539 | 0.0261 |
| ENST00000437161 | ENSG00000187522 | HSPA14 | 10:14861248-14920721 | Protein_coding_from_Ensembl | 1.57654 | 0.193557 | 0.0351 |
| ENST00000361339 | ENSG00000187535 | IFT140 | 16:1543344-1662111 | Protein_coding_from_Ensembl | 1.02758 | 0.204754 | 0.0081 |
| ENST00000535863 | ENSG00000187555 | USP7 | 16:8985950-9060847 | Protein_coding_from_Ensembl | 0.364051 | 2.33643 | 5.00E-05 |
| ENST00000464847 | ENSG00000187607 | ZNF286A | 17:15468796-16256970 | Protein_coding_from_Ensembl | 1.59528 | 0.632948 | 0.0002 |
| ENST00000360127 | ENSG00000187624 | C17orf97 | 17:254325-273510 | Protein_coding_from_Ensembl | 0.584805 | 1.3752 | 0.0328 |
| ENST00000423974 | ENSG00000187626 | ZKSCAN4 | 6:28212400-28227011 | Protein_coding_from_Ensembl | 0.982901 | 2.16415 | 0.0164 |
| ENST00000397071 | ENSG00000187630 | DHRS4L2 | 14:24407939-24475617 | Protein_coding_from_Ensembl | 1.38492 | 3.60769 | 0.0053 |
| ENST00000341065 | ENSG00000187634 | SAMD11 | 1:860259-894689 | Protein_coding_from_Ensembl | 2.76326 | 1.2497 | 0.00115 |
| ENST00000375807 | ENSG00000187742 | SECISBP2 | 9:91933420-91974557 | Protein_coding_from_Ensembl | 10.1101 | 3.34625 | 5.00E-05 |
| ENST00000339901 | ENSG00000187742 | SECISBP2 | 9:91933420-91974557 | Protein_coding_from_Ensembl | 0.668669 | 8.44262 | 5.00E-05 |
| ENST00000420101 | ENSG00000187764 | SEMA4D | 9:91975701-92235607 | Protein_coding_from_Ensembl | 0.377688 | 1.01741 | 0.04045 |
| ENST00000357123 | ENSG00000187778 | MCRS1 | 12:49932939-49961936 | Protein_coding_from_Ensembl | 2.20152 | 4.80247 | 0.00135 |
| ENST00000371732 | ENSG00000187796 | CARD9 | 9:139221931-139268133 | Protein_coding_from_Ensembl | 0.421758 | 1.68016 | 0.0047 |
| ENST00000434620 | ENSG00000187955 | COL14A1 | 8:121072018-121384275 | Protein_coding_from_Ensembl | 10.8641 | 4.92701 | 5.00E-05 |
| ENST00000339728 | ENSG00000188042 | ARL4C | 2:235401684-235405697 | Protein_coding_from_Ensembl | 0.439977 | 1.71074 | 0.0004 |
| ENST00000590503 | ENSG00000188283 | ZNF383 | 19:37498758-37734828 | Protein_coding_from_Ensembl | 2.36788 | 1.17828 | 0.01535 |
| ENST00000518322 | ENSG00000188343 | FAM92A1 | 8:94225530-94753245 | Protein_coding_from_Ensembl | 0.833236 | 0.307947 | 0.0076 |
| ENST00000518829 | ENSG00000188343 | FAM92A1 | 8:94225530-94753245 | Protein_coding_from_Ensembl | 2.42423 | 5.34004 | 0.0477 |
| ENST00000537751 | ENSG00000188419 | CHM | X:85116184-85302566 | Protein_coding_from_Ensembl | 1.29075 | 3.79484 | 5.00E-05 |
| ENST00000559313 | ENSG00000188549 | C15orf52 | 15:40623652-40633168 | Protein_coding_from_Ensembl | 1.71747 | 0.467183 | 0.00095 |
| ENST00000560922 | ENSG00000188549 | C15orf52 | 15:40623652-40633168 | Protein_coding_from_Ensembl | 0.934378 | 6.23125 | 0.0237 |
| ENST00000298953 | ENSG00000188596 | C12orf55 | 12:96883348-97269333 | Protein_coding_from_Ensembl | 0.139317 | 1.24597 | 0.04485 |
| ENST00000444029 | ENSG00000188677 | PARVB | 22:44319618-44568829 | Protein_coding_from_Ensembl | 2.1349 | 4.70286 | 0.02315 |
| ENST00000545398 | ENSG00000188917 | TRMT2B | X:100264334-100351353 | Protein_coding_from_Ensembl | 0.455414 | 2.00308 | 0.00025 |
| ENST00000339430 | ENSG00000189067 | LITAF | 16:11641577-11730237 | Protein_coding_from_Ensembl | 2.358 | 4.99478 | 5.00E-05 |
| ENST00000590414 | ENSG00000189144 | ZNF573 | 19:38226733-38307940 | Protein_coding_from_Ensembl | 0.891548 | 2.79263 | 0.00015 |
| ENST00000440685 | ENSG00000189171 | S100A13 | 1:153591262-153618782 | Protein_coding_from_Ensembl | 8.70849 | 21.8419 | 5.00E-05 |
| ENST00000422387 | ENSG00000189337 | KAZN | 1:14925199-15478960 | Protein_coding_from_Ensembl | 1.8853 | 0.613806 | 5.00E-05 |
| ENST00000361144 | ENSG00000189337 | KAZN | 1:14925199-15478960 | Protein_coding_from_Ensembl | 0.574826 | 1.79868 | 0.0001 |
| ENST00000380554 | ENSG00000196139 | AKR1C3 | 10:5077545-5149878 | Protein_coding_from_Ensembl | 0.402131 | 1.39898 | 0.0165 |
| ENST00000453663 | ENSG00000196141 | SPATS2L | 2:201170603-201346986 | Protein_coding_from_Ensembl | 0.579642 | 3.62008 | 0.04975 |
| ENST00000359774 | ENSG00000196151 | WDSUB1 | 2:160092303-160143310 | Protein_coding_from_Ensembl | 1.48837 | 0.50103 | 0.0109 |
| ENST00000368715 | ENSG00000196154 | S100A4 | 1:153516088-153524245 | Protein_coding_from_Ensembl | 4.28292 | 0.792613 | 0.0465 |
| ENST00000359801 | ENSG00000196209 | SIRPB2 | 20:1422806-1472233 | Protein_coding_from_Ensembl | 0.611675 | 1.38326 | 0.0076 |
| ENST00000359191 | ENSG00000196235 | SUPT5H | 19:39926795-39967310 | Protein_coding_from_Ensembl | 0.426115 | 1.60351 | 0.0002 |
| ENST00000489459 | ENSG00000196262 | PPIA | 7:44836278-44864163 | Protein_coding_from_Ensembl | 4.23005 | 11.9251 | 5.00E-05 |
| ENST00000371459 | ENSG00000196284 | SUPT3H | 6:44777053-45634483 | Protein_coding_from_Ensembl | 0.386377 | 1.46053 | 0.0105 |
| ENST00000375629 | ENSG00000196305 | IARS | 9:94972488-95056038 | Protein_coding_from_Ensembl | 0.381882 | 0.98822 | 0.003 |
| ENST00000456197 | ENSG00000196367 | TRRAP | 7:98475555-98741723 | Protein_coding_from_Ensembl | 2.87275 | 1.01972 | 5.00E-05 |
| ENST00000446306 | ENSG00000196367 | TRRAP | 7:98475555-98741723 | Protein_coding_from_Ensembl | 0.956538 | 2.33655 | 5.00E-05 |
| ENST00000402580 | ENSG00000196419 | XRCC6 | 22:42017122-42060044 | Protein_coding_from_Ensembl | 2.5303 | 1.19402 | 0.00475 |
| ENST00000380579 | ENSG00000196459 | TRAPPC2 | X:13730362-13752754 | Protein_coding_from_Ensembl | 2.05342 | 0.733413 | 0.00125 |
| ENST00000420698 | ENSG00000196498 | NCOR2 | 12:124808960-125052135 | Protein_coding_from_Ensembl | 5.7493 | 2.54155 | 5.00E-05 |
| ENST00000393891 | ENSG00000196531 | NACA | 12:57106210-57181574 | Protein_coding_from_Ensembl | 8.77173 | 18.8892 | 5.00E-05 |
| ENST00000360468 | ENSG00000196547 | MAN2A2 | 15:91411821-91579841 | Protein_coding_from_Ensembl | 3.04456 | 1.43872 | 5.00E-05 |
| ENST00000348261 | ENSG00000196557 | CACNA1H | 16:1203240-1275257 | Protein_coding_from_Ensembl | 2.00648 | 0.708017 | 5.00E-05 |
| ENST00000437955 | ENSG00000196562 | SULF2 | 20:45837858-46415712 | Protein_coding_from_Ensembl | 16.9483 | 8.41798 | 0.0005 |
| ENST00000369981 | ENSG00000196586 | MYO6 | 6:76458908-76629254 | Protein_coding_from_Ensembl | 2.79358 | 5.80385 | 5.00E-05 |
| ENST00000519108 | ENSG00000196591 | HDAC2 | 6:114219724-114792869 | Protein_coding_from_Ensembl | 4.16219 | 1.90164 | 0.00025 |
| ENST00000570177 | ENSG00000196628 | TCF4 | 18:52889561-53332018 | Protein_coding_from_Ensembl | 0.317589 | 1.16531 | 0.04265 |
| ENST00000568740 | ENSG00000196628 | TCF4 | 18:52889561-53332018 | Protein_coding_from_Ensembl | 6.04525 | 2.84967 | 5.00E-05 |
| ENST00000537578 | ENSG00000196628 | TCF4 | 18:52889561-53332018 | Protein_coding_from_Ensembl | 0.67849 | 2.85415 | 0.0001 |
| ENST00000570287 | ENSG00000196628 | TCF4 | 18:52889561-53332018 | Protein_coding_from_Ensembl | 1.90592 | 7.40071 | 5.00E-05 |
| ENST00000436624 | ENSG00000196653 | ZNF502 | 3:44754134-44765323 | Protein_coding_from_Ensembl | 1.0796 | 0.504286 | 0.03655 |
| ENST00000449836 | ENSG00000196653 | ZNF502 | 3:44754134-44765323 | Protein_coding_from_Ensembl | 0.953832 | 2.0982 | 0.00045 |
| ENST00000359005 | ENSG00000196655 | TRAPPC4 | 11:118868842-118901616 | Protein_coding_from_Ensembl | 0.875011 | 2.90827 | 0.04205 |
| ENST00000399756 | ENSG00000196689 | TRPV1 | 17:3468737-3539616 | Protein_coding_from_Ensembl | 1.03563 | 0.133376 | 0.0047 |
| ENST00000580753 | ENSG00000196704 | AMZ2 | 17:66242769-66253297 | Protein_coding_from_Ensembl | 5.57673 | 0.436125 | 0.0021 |
| ENST00000357479 | ENSG00000196792 | STRN3 | 14:31343719-31562818 | Protein_coding_from_Ensembl | 1.4811 | 3.28152 | 5.00E-05 |
| ENST00000535642 | ENSG00000196793 | ZNF239 | 10:44051791-44070066 | Protein_coding_from_Ensembl | 1.41494 | 0.473287 | 0.0146 |
| ENST00000391911 | ENSG00000196878 | LAMB3 | 1:209788214-209825811 | Protein_coding_from_Ensembl | 0.316339 | 1.39861 | 0.00015 |
| ENST00000393551 | ENSG00000196923 | PDLIM7 | 5:176909863-176938275 | Protein_coding_from_Ensembl | 2.88313 | 0.531172 | 0.0076 |
| ENST00000359895 | ENSG00000196923 | PDLIM7 | 5:176909863-176938275 | Protein_coding_from_Ensembl | 0.881741 | 4.13423 | 0.00025 |
| ENST00000485908 | ENSG00000196998 | WDR45 | X:48928812-48958108 | Protein_coding_from_Ensembl | 6.00164 | 0.76742 | 0.00015 |
| ENST00000370409 | ENSG00000197021 | CXorf40B | X:149097744-149392815 | Protein_coding_from_Ensembl | 0.980186 | 2.53782 | 0.01875 |
| ENST00000426851 | ENSG00000197024 | ZNF398 | 7:148823507-148880116 | Protein_coding_from_Ensembl | 1.09953 | 0.272671 | 5.00E-05 |
| ENST00000334715 | ENSG00000197037 | ZSCAN25 | 7:99214568-99230030 | Protein_coding_from_Ensembl | 2.26139 | 1.1165 | 0.00035 |
| ENST00000392366 | ENSG00000197063 | MAFG | 17:79869814-79885590 | Protein_coding_from_Ensembl | 0.216751 | 1.02388 | 0.0352 |
| ENST00000548933 | ENSG00000197111 | PCBP2 | 12:53835388-53893847 | Protein_coding_from_Ensembl | 1.31988 | 3.79091 | 0.00885 |
| ENST00000357119 | ENSG00000197114 | ZGPAT | 20:62289162-62374858 | Protein_coding_from_Ensembl | 0.458802 | 1.33773 | 0.02475 |
| ENST00000425074 | ENSG00000197128 | ZNF772 | 19:57874844-57988938 | Protein_coding_from_Ensembl | 0.507064 | 1.26358 | 0.04595 |
| ENST00000477092 | ENSG00000197150 | ABCB8 | 7:150725509-150744869 | Protein_coding_from_Ensembl | 1.93061 | 0.353064 | 0.00975 |
| ENST00000404814 | ENSG00000197249 | SERPINA1 | 14:94843083-94857030 | Protein_coding_from_Ensembl | 1.04116 | 4.48953 | 0.0002 |
| ENST00000432929 | ENSG00000197256 | KANK2 | 19:11274942-11308467 | Protein_coding_from_Ensembl | 2.47212 | 1.12575 | 5.00E-05 |
| ENST00000588787 | ENSG00000197256 | KANK2 | 19:11274942-11308467 | Protein_coding_from_Ensembl | 1.54443 | 3.61493 | 0.0001 |
| ENST00000536648 | ENSG00000197301 | RP11-366L20.2 | 12:66151799-66360075 | Protein_coding_from_Ensembl | 0.76349 | 2.68283 | 0.04155 |
| ENST00000398696 | ENSG00000197302 | ZNF720 | 16:31724549-31806190 | Protein_coding_from_Ensembl | 0.66707 | 1.66629 | 0.04235 |
| ENST00000375398 | ENSG00000197321 | SVIL | 10:29698330-30543666 | Protein_coding_from_Ensembl | 1.19436 | 2.83157 | 5.00E-05 |
| ENST00000451334 | ENSG00000197362 | ZNF786 | 7:148766734-148787874 | Protein_coding_from_Ensembl | 1.47106 | 0.213303 | 0.00315 |
| ENST00000599168 | ENSG00000197372 | ZNF675 | 19:23708432-23870022 | Protein_coding_from_Ensembl | 1.05851 | 3.72862 | 0.0395 |
| ENST00000245407 | ENSG00000197375 | SLC22A5 | 5:131520568-131731306 | Protein_coding_from_Ensembl | 0.996691 | 0.334555 | 0.0098 |
| ENST00000514234 | ENSG00000197530 | MIB2 | 1:1547276-1565990 | Protein_coding_from_Ensembl | 0.24562 | 1.14175 | 0.008 |
| ENST00000356338 | ENSG00000197535 | MYO5A | 15:52596648-52821247 | Protein_coding_from_Ensembl | 1.09232 | 0.485214 | 5.00E-05 |
| ENST00000399229 | ENSG00000197535 | MYO5A | 15:52596648-52821247 | Protein_coding_from_Ensembl | 2.12628 | 4.32836 | 0.00175 |
| ENST00000379858 | ENSG00000197579 | TOPORS | 9:32540541-32573160 | Protein_coding_from_Ensembl | 4.85735 | 2.14494 | 5.00E-05 |
| ENST00000354989 | ENSG00000197586 | ENTPD6 | 20:25165309-25207370 | Protein_coding_from_Ensembl | 1.20032 | 0.348017 | 0.00585 |
| ENST00000508244 | ENSG00000197603 | C5orf42 | 5:37106329-37254730 | Protein_coding_from_Ensembl | 2.89287 | 0.123942 | 5.00E-05 |
| ENST00000425232 | ENSG00000197603 | C5orf42 | 5:37106329-37254730 | Protein_coding_from_Ensembl | 1.07651 | 2.83636 | 5.00E-05 |
| ENST00000396549 | ENSG00000197614 | MFAP5 | 12:8786962-8815484 | Protein_coding_from_Ensembl | 8.77939 | 3.78516 | 5.00E-05 |
| ENST00000441248 | ENSG00000197620 | CXorf40A | X:148558520-148632055 | Protein_coding_from_Ensembl | 1.26287 | 0.61697 | 0.035 |
| ENST00000540998 | ENSG00000197622 | CDC42SE1 | 1:151020215-151098018 | Protein_coding_from_Ensembl | 3.47102 | 0.715215 | 5.00E-05 |
| ENST00000539723 | ENSG00000197702 | PARVA | 11:12398731-12552348 | Protein_coding_from_Ensembl | 6.10771 | 2.52143 | 5.00E-05 |
| ENST00000599602 | ENSG00000197714 | ZNF460 | 19:57778587-57805837 | Protein_coding_from_Ensembl | 5.79405 | 1.03652 | 0.0259 |
| ENST00000357246 | ENSG00000197769 | MAP1LC3C | 1:242147326-242687998 | Protein_coding_from_Ensembl | 0.88228 | 2.24595 | 0.0324 |
| ENST00000339113 | ENSG00000197785 | ATAD3A | 1:1447530-1470067 | Protein_coding_from_Ensembl | 0.940857 | 0.223215 | 0.01885 |
| ENST00000492450 | ENSG00000197841 | ZNF181 | 19:35224207-35233777 | Protein_coding_from_Ensembl | 1.46001 | 0.493472 | 0.0172 |
| ENST00000355684 | ENSG00000197857 | ZNF44 | 19:12305537-12405702 | Protein_coding_from_Ensembl | 2.97274 | 0.933885 | 0.00025 |
| ENST00000406434 | ENSG00000197872 | FAM49A | 2:16730726-16847599 | Protein_coding_from_Ensembl | 1.40084 | 0.347325 | 0.02635 |
| ENST00000359786 | ENSG00000197879 | MYO1C | 17:1367391-1396106 | Protein_coding_from_Ensembl | 4.61793 | 2.234 | 5.00E-05 |
| ENST00000521515 | ENSG00000197892 | KIF13B | 8:28924795-29120641 | Protein_coding_from_Ensembl | 2.65097 | 1.24585 | 0.00175 |
| ENST00000334197 | ENSG00000197937 | ZNF347 | 19:53569858-53696639 | Protein_coding_from_Ensembl | 0.513077 | 1.28543 | 0.0016 |
| ENST00000327668 | ENSG00000198040 | ZNF84 | 12:133613877-133639885 | Protein_coding_from_Ensembl | 1.90691 | 0.891105 | 5.00E-05 |
| ENST00000358771 | ENSG00000198053 | SIRPA | 20:1875153-1920543 | Protein_coding_from_Ensembl | 1.2515 | 3.7341 | 5.00E-05 |
| ENST00000355472 | ENSG00000198055 | GRK6 | 5:176829140-176883283 | Protein_coding_from_Ensembl | 1.59279 | 0.394608 | 0.00115 |
| ENST00000393576 | ENSG00000198055 | GRK6 | 5:176829140-176883283 | Protein_coding_from_Ensembl | 0.425806 | 1.12753 | 0.00845 |
| ENST00000507633 | ENSG00000198055 | GRK6 | 5:176829140-176883283 | Protein_coding_from_Ensembl | 0.740491 | 1.50141 | 0.04025 |
| ENST00000443326 | ENSG00000198089 | SFI1 | 22:31795508-32058418 | Protein_coding_from_Ensembl | 1.11702 | 2.44594 | 0.0003 |
| ENST00000269829 | ENSG00000198131 | ZNF544 | 19:58739959-58853698 | Protein_coding_from_Ensembl | 3.34695 | 1.39029 | 5.00E-05 |
| ENST00000357692 | ENSG00000198160 | MIER1 | 1:67390577-67454302 | Protein_coding_from_Ensembl | 2.52932 | 1.04455 | 5.00E-05 |
| ENST00000355202 | ENSG00000198182 | ZNF607 | 19:37988062-38210691 | Protein_coding_from_Ensembl | 1.9416 | 0.887036 | 0.0003 |
| ENST00000395835 | ENSG00000198182 | ZNF607 | 19:37988062-38210691 | Protein_coding_from_Ensembl | 0.669862 | 1.99761 | 5.00E-05 |
| ENST00000381524 | ENSG00000198223 | CSF2RA | X:1387692-1429274 | Protein_coding_from_Ensembl | 0.663604 | 1.71192 | 0.0063 |
| ENST00000358711 | ENSG00000198276 | UCKL1 | 20:62526517-62680994 | Protein_coding_from_Ensembl | 0.337835 | 1.2537 | 0.0282 |
| ENST00000368196 | ENSG00000198400 | NTRK1 | 1:156776034-156851642 | Protein_coding_from_Ensembl | 1.51764 | 0.714149 | 0.0094 |
| ENST00000478172 | ENSG00000198420 | FAM115A | 7:143548467-143599291 | Protein_coding_from_Ensembl | 4.96531 | 1.3509 | 0.02595 |
| ENST00000491908 | ENSG00000198420 | FAM115A | 7:143548467-143599291 | Protein_coding_from_Ensembl | 1.33458 | 5.18136 | 0.02005 |
| ENST00000441560 | ENSG00000198513 | ATL1 | 14:50885218-51135049 | Protein_coding_from_Ensembl | 1.06462 | 0.321765 | 0.01055 |
| ENST00000438150 | ENSG00000198538 | ZNF28 | 19:53300660-53541151 | Protein_coding_from_Ensembl | 0.978508 | 0.415365 | 0.00215 |
| ENST00000361796 | ENSG00000198561 | CTNND1 | 11:57479994-57587018 | Protein_coding_from_Ensembl | 3.08356 | 0.294827 | 5.00E-05 |
| ENST00000532245 | ENSG00000198561 | CTNND1 | 11:57479994-57587018 | Protein_coding_from_Ensembl | 0.685758 | 1.95872 | 5.00E-05 |
| ENST00000529526 | ENSG00000198561 | CTNND1 | 11:57479994-57587018 | Protein_coding_from_Ensembl | 0.642012 | 2.21546 | 5.00E-05 |
| ENST00000419338 | ENSG00000198563 | DDX39B | 6:31496493-31526606 | Protein_coding_from_Ensembl | 1.86485 | 4.24318 | 0.01975 |
| ENST00000415382 | ENSG00000198563 | DDX39B | 6:31496493-31526606 | Protein_coding_from_Ensembl | 17.4854 | 7.18549 | 5.00E-05 |
| ENST00000431350 | ENSG00000198586 | TLK1 | 2:171847332-172087824 | Protein_coding_from_Ensembl | 2.27057 | 1.03654 | 5.00E-05 |
| ENST00000367179 | ENSG00000198625 | MDM4 | 1:204485510-204542871 | Protein_coding_from_Ensembl | 4.40725 | 2.00116 | 0.03855 |
| ENST00000557020 | ENSG00000198668 | CALM1 | 14:90862845-90874605 | Protein_coding_from_Ensembl | 22.1939 | 8.84567 | 0.00045 |
| ENST00000565466 | ENSG00000198690 | FAN1 | 15:31196054-31283810 | Protein_coding_from_Ensembl | 1.24104 | 2.88625 | 0.00055 |
| ENST00000361577 | ENSG00000198718 | FAM179B | 14:45393521-45543634 | Protein_coding_from_Ensembl | 0.048599 | 1.79905 | 0.02515 |
| ENST00000381151 | ENSG00000198743 | SLC5A3 | 21:35445523-35734378 | Protein_coding_from_Ensembl | 4.27071 | 0.157032 | 5.00E-05 |
| ENST00000376838 | ENSG00000198793 | MTOR | 1:11166591-11322564 | Protein_coding_from_Ensembl | 0.808275 | 0.348493 | 0.0135 |
| ENST00000378945 | ENSG00000198814 | GK | X:30671475-30748725 | Protein_coding_from_Ensembl | 0.62699 | 1.27646 | 0.03455 |
| ENST00000361510 | ENSG00000198836 | OPA1 | 3:193310932-193415612 | Protein_coding_from_Ensembl | 1.22235 | 0.434764 | 0.0001 |
| ENST00000361822 | ENSG00000198839 | ZNF277 | 7:111846642-112049678 | Protein_coding_from_Ensembl | 0.638571 | 4.76044 | 0.00015 |
| ENST00000361641 | ENSG00000198860 | TSEN15 | 1:184020810-184043346 | Protein_coding_from_Ensembl | 3.13356 | 1.18664 | 0.00065 |
| ENST00000394249 | ENSG00000198901 | PRC1 | 15:91411821-91579841 | Protein_coding_from_Ensembl | 0.368694 | 0.857616 | 0.0369 |
| ENST00000579585 | ENSG00000198909 | MAP3K3 | 17:61627821-61896677 | Protein_coding_from_Ensembl | 3.76553 | 0.120564 | 0.021 |
| ENST00000396761 | ENSG00000198925 | ATG9A | 2:220074489-220094439 | Protein_coding_from_Ensembl | 3.83518 | 1.71181 | 5.00E-05 |
| ENST00000361362 | ENSG00000198939 | ZFP2 | 5:178107231-178368084 | Protein_coding_from_Ensembl | 0.610174 | 1.29753 | 0.02055 |
| ENST00000361471 | ENSG00000198947 | DMD | X:31115793-33357558 | Protein_coding_from_Ensembl | 2.11228 | 0.756042 | 0.0024 |
| ENST00000378702 | ENSG00000198947 | DMD | X:31115793-33357558 | Protein_coding_from_Ensembl | 0.217912 | 1.19452 | 0.01125 |
| ENST00000366789 | ENSG00000203685 | C1orf95 | 1:226736500-226796915 | Protein_coding_from_Ensembl | 0.97988 | 0.246666 | 5.00E-05 |
| ENST00000366788 | ENSG00000203685 | C1orf95 | 1:226736500-226796915 | Protein_coding_from_Ensembl | 1.0007 | 2.01401 | 5.00E-05 |
| ENST00000369758 | ENSG00000203880 | PCMTD2 | 20:62887093-62944485 | Protein_coding_from_Ensembl | 2.80462 | 1.15717 | 0.0001 |
| ENST00000609818 | ENSG00000203880 | PCMTD2 | 20:62887093-62944485 | Protein_coding_from_Ensembl | 14.1041 | 2.28809 | 0.00085 |
| ENST00000609372 | ENSG00000203880 | PCMTD2 | 20:62887093-62944485 | Protein_coding_from_Ensembl | 1.34807 | 6.91013 | 0.00015 |
| ENST00000452341 | ENSG00000204120 | GIGYF2 | 2:233562008-233880595 | Protein_coding_from_Ensembl | 0.800685 | 2.53419 | 0.00025 |
| ENST00000373836 | ENSG00000204138 | PHACTR4 | 1:28696113-28829283 | Protein_coding_from_Ensembl | 1.57048 | 3.5195 | 5.00E-05 |
| ENST00000266000 | ENSG00000204209 | DAXX | 6:33286334-33297046 | Protein_coding_from_Ensembl | 0.476591 | 1.26591 | 0.0082 |
| ENST00000395131 | ENSG00000204220 | PFDN6 | 6:33244916-33267101 | Protein_coding_from_Ensembl | 2.23655 | 0.708308 | 0.0463 |
| ENST00000395194 | ENSG00000204248 | COL11A2 | 6:33130457-33160276 | Protein_coding_from_Ensembl | 0.983922 | 2.21914 | 0.0424 |
| ENST00000341947 | ENSG00000204248 | COL11A2 | 6:33130457-33160276 | Protein_coding_from_Ensembl | 1.35835 | 2.79041 | 5.00E-05 |
| ENST00000375129 | ENSG00000204311 | DFNB59 | 2:179278665-179326117 | Protein_coding_from_Ensembl | 1.12928 | 0.310236 | 0.045 |
| ENST00000375633 | ENSG00000204387 | C6orf48 | 6:31802384-31807541 | Protein_coding_from_Ensembl | 4.95688 | 1.73699 | 0.0337 |
| ENST00000375706 | ENSG00000204397 | CARD16 | 11:104896169-104972158 | Protein_coding_from_Ensembl | 4.61456 | 2.22949 | 0.03835 |
| ENST00000376148 | ENSG00000204498 | NFKBIL1 | 6:31496493-31526606 | Protein_coding_from_Ensembl | 7.02889 | 0.616699 | 0.00035 |
| ENST00000449934 | ENSG00000204520 | MICA | 6:31362065-31445283 | Protein_coding_from_Ensembl | 0.9134 | 2.11975 | 0.01795 |
| ENST00000396268 | ENSG00000204536 | CCHCR1 | 6:31082526-31126015 | Protein_coding_from_Ensembl | 1.38118 | 0.511778 | 0.0024 |
| ENST00000396548 | ENSG00000204599 | TRIM39 | 6:30201815-30314661 | Protein_coding_from_Ensembl | 1.41834 | 3.29708 | 5.00E-05 |
| ENST00000504726 | ENSG00000204628 | GNB2L1 | 5:180663908-180699308 | Protein_coding_from_Ensembl | 25.2755 | 9.98143 | 0.00475 |
| ENST00000409318 | ENSG00000204634 | TBC1D8 | 2:101436613-101886778 | Protein_coding_from_Ensembl | 1.66559 | 0.670984 | 0.0011 |
| ENST00000259951 | ENSG00000204642 | HLA-F | 6:29690551-29718925 | Protein_coding_from_Ensembl | 1.66029 | 0.587685 | 0.02115 |
| ENST00000391835 | ENSG00000204673 | AKT1S1 | 19:50372294-50464429 | Protein_coding_from_Ensembl | 0.564055 | 1.69651 | 0.00105 |
| ENST00000355973 | ENSG00000204681 | GABBR1 | 6:29523291-29601753 | Protein_coding_from_Ensembl | 1.11533 | 2.88284 | 5.00E-05 |
| ENST00000550703 | ENSG00000204852 | TCTN1 | 12:111051831-111142755 | Protein_coding_from_Ensembl | 0.944948 | 1.90004 | 0.01015 |
| ENST00000377673 | ENSG00000204856 | FAM216A | 12:110890288-110928190 | Protein_coding_from_Ensembl | 1.37008 | 0.307561 | 0.02665 |
| ENST00000420995 | ENSG00000204977 | TRIM13 | 13:50526011-51424041 | Protein_coding_from_Ensembl | 1.33349 | 0.651691 | 0.0327 |
| ENST00000457662 | ENSG00000204977 | TRIM13 | 13:50526011-51424041 | Protein_coding_from_Ensembl | 1.28395 | 2.96395 | 0.0129 |
| ENST00000378247 | ENSG00000204991 | SPIRE2 | 16:89883184-89937727 | Protein_coding_from_Ensembl | 0.838606 | 0.40376 | 0.03495 |
| ENST00000455036 | ENSG00000205189 | ZBTB10 | 8:81356729-81438500 | Protein_coding_from_Ensembl | 1.96432 | 0.852532 | 5.00E-05 |
| ENST00000426744 | ENSG00000205189 | ZBTB10 | 8:81356729-81438500 | Protein_coding_from_Ensembl | 0.64094 | 1.68782 | 5.00E-05 |
| ENST00000538815 | ENSG00000205336 | GPR56 | 16:57644563-57698944 | Protein_coding_from_Ensembl | 0.359611 | 0.882172 | 0.00765 |
| ENST00000332374 | ENSG00000205358 | MT1H | 16:56703725-56705041 | Protein_coding_from_Ensembl | 1.51883 | 0 | 0.01155 |
| ENST00000512148 | ENSG00000205403 | CFI | 4:110661851-110723335 | Protein_coding_from_Ensembl | 0.698662 | 2.10563 | 0.0031 |
| ENST00000399349 | ENSG00000205726 | ITSN1 | 21:34876237-35351160 | Protein_coding_from_Ensembl | 0.444123 | 2.9632 | 5.00E-05 |
| ENST00000399338 | ENSG00000205726 | ITSN1 | 21:34876237-35351160 | Protein_coding_from_Ensembl | 0.586902 | 3.76378 | 5.00E-05 |
| ENST00000397086 | ENSG00000205937 | RNPS1 | 16:2205698-2324592 | Protein_coding_from_Ensembl | 3.53164 | 1.09125 | 5.00E-05 |
| ENST00000568631 | ENSG00000205937 | RNPS1 | 16:2205698-2324592 | Protein_coding_from_Ensembl | 0.56743 | 1.28723 | 0.0465 |
| ENST00000566397 | ENSG00000205937 | RNPS1 | 16:2205698-2324592 | Protein_coding_from_Ensembl | 0.64079 | 2.42559 | 0.0045 |
| ENST00000562684 | ENSG00000206053 | HN1L | 16:1662325-1752281 | Protein_coding_from_Ensembl | 0.977069 | 2.29565 | 0.0005 |
| ENST00000399451 | ENSG00000206560 | ANKRD28 | 3:15708742-15901278 | Protein_coding_from_Ensembl | 3.77058 | 0.971895 | 5.00E-05 |
| ENST00000391369 | ENSG00000212673 | AL136115.1 | 1:32307619-32410457 | Protein_coding_from_Ensembl | 1.9011 | 0.691342 | 0.0143 |
| ENST00000422090 | ENSG00000213024 | NUP62 | 19:50372294-50464429 | Protein_coding_from_Ensembl | 5.86344 | 2.9298 | 5.00E-05 |
| ENST00000367825 | ENSG00000213064 | SFT2D2 | 1:168195175-168222263 | Protein_coding_from_Ensembl | 0.448671 | 3.18814 | 0.04845 |
| ENST00000367186 | ENSG00000213079 | SCAF8 | 6:155054458-155635627 | Protein_coding_from_Ensembl | 1.2322 | 4.37898 | 5.00E-05 |
| ENST00000537147 | ENSG00000213088 | DARC | 1:159141398-159177763 | Protein_coding_from_Ensembl | 0.490856 | 1.46023 | 0.01455 |
| ENST00000342944 | ENSG00000213096 | ZNF254 | 19:24216246-24312654 | Protein_coding_from_Ensembl | 0.467341 | 2.17167 | 0.0001 |
| ENST00000330233 | ENSG00000213145 | CRIP1 | 14:105952653-105965912 | Protein_coding_from_Ensembl | 0.314726 | 1.67781 | 0.0289 |
| ENST00000392647 | ENSG00000213160 | KLHL23 | 2:170550974-170633499 | Protein_coding_from_Ensembl | 1.07812 | 0.382349 | 0.0028 |
| ENST00000292596 | ENSG00000213316 | LTC4S | 5:179159850-179223648 | Protein_coding_from_Ensembl | 6.38266 | 3.07061 | 0.0202 |
| ENST00000423571 | ENSG00000213347 | MXD3 | 5:176728198-176739758 | Protein_coding_from_Ensembl | 1.2582 | 0.43188 | 0.0373 |
| ENST00000513063 | ENSG00000213347 | MXD3 | 5:176728198-176739758 | Protein_coding_from_Ensembl | 1.00603 | 2.64178 | 0.0418 |
| ENST00000241337 | ENSG00000213366 | GSTM2 | 1:110158725-110318050 | Protein_coding_from_Ensembl | 0.670375 | 2.64566 | 0.0133 |
| ENST00000358531 | ENSG00000213390 | ARHGAP19 | 10:98757794-99052413 | Protein_coding_from_Ensembl | 1.03276 | 2.94849 | 5.00E-05 |
| ENST00000570980 | ENSG00000213398 | LCAT | 16:67973652-68003504 | Protein_coding_from_Ensembl | 2.41884 | 1.16329 | 0.0349 |
| ENST00000533729 | ENSG00000213465 | ARL2 | 11:64781584-64808044 | Protein_coding_from_Ensembl | 2.65845 | 0.748754 | 0.04365 |
| ENST00000586216 | ENSG00000213494 | CCL14 | 17:34310326-34338658 | Protein_coding_from_Ensembl | 9.44624 | 21.5353 | 0.0022 |
| ENST00000458035 | ENSG00000213799 | ZNF845 | 19:53837001-53858122 | Protein_coding_from_Ensembl | 1.68432 | 0.53808 | 0.0001 |
| ENST00000559284 | ENSG00000213928 | IRF9 | 14:24612573-24636611 | Protein_coding_from_Ensembl | 0.663627 | 3.91268 | 0.04925 |
| ENST00000378842 | ENSG00000213930 | GALT | 9:34638129-34681295 | Protein_coding_from_Ensembl | 0.60745 | 1.99361 | 0.00455 |
| ENST00000455274 | ENSG00000214021 | TTLL3 | 3:9791627-9896822 | Protein_coding_from_Ensembl | 3.24825 | 8.15307 | 5.00E-05 |
| ENST00000425389 | ENSG00000214022 | REPIN1 | 7:150060865-150109699 | Protein_coding_from_Ensembl | 9.49661 | 3.50401 | 5.00E-05 |
| ENST00000397411 | ENSG00000214063 | TSPAN4 | 11:842807-867116 | Protein_coding_from_Ensembl | 3.37697 | 1.39879 | 0.0162 |
| ENST00000397861 | ENSG00000214226 | C17orf67 | 17:54869273-54946036 | Protein_coding_from_Ensembl | 1.55487 | 0.559389 | 0.008 |
| ENST00000381218 | ENSG00000214717 | ZBED1 | X:2137556-2420846 | Protein_coding_from_Ensembl | 0.426262 | 0.951437 | 0.02745 |
| ENST00000542912 | ENSG00000215021 | PHB2 | 12:7072357-7178336 | Protein_coding_from_Ensembl | 1.05839 | 3.88778 | 0.01475 |
| ENST00000399742 | ENSG00000215187 | FAM166B | 9:35490006-35563896 | Protein_coding_from_Ensembl | 0.920071 | 2.4988 | 0.0311 |
| ENST00000380443 | ENSG00000215305 | VPS16 | 20:2815959-3019747 | Protein_coding_from_Ensembl | 3.1592 | 1.49254 | 0.0032 |
| ENST00000378539 | ENSG00000221866 | PLXNA4 | 7:131808090-132333447 | Protein_coding_from_Ensembl | 1.11142 | 0.154309 | 0.03545 |
| ENST00000315985 | ENSG00000221914 | PPP2R2A | 8:26149006-26230196 | Protein_coding_from_Ensembl | 0.373683 | 1.49395 | 0.0097 |
| ENST00000336708 | ENSG00000221926 | TRIM16 | 17:15468796-16256970 | Protein_coding_from_Ensembl | 0.308643 | 1.95325 | 0.0027 |
| ENST00000361568 | ENSG00000221988 | PPT2 | 6:32116135-32145873 | Protein_coding_from_Ensembl | 2.94641 | 1.31799 | 0.00415 |
| ENST00000375137 | ENSG00000221988 | PPT2 | 6:32116135-32145873 | Protein_coding_from_Ensembl | 0.741472 | 1.7777 | 0.0117 |
| ENST00000444362 | ENSG00000224870 | RP4-758J18.2 | 1:1334901-1342693 | Protein_coding_from_Ensembl | 0.773103 | 3.04147 | 0.00075 |
| ENST00000565624 | ENSG00000225614 | ZNF469 | 16:88489840-88507195 | Protein_coding_from_Ensembl | 0.238925 | 2.56179 | 5.00E-05 |
| ENST00000555004 | ENSG00000227051 | C14orf132 | 14:96505660-96560417 | Protein_coding_from_Ensembl | 0.383656 | 1.40761 | 5.00E-05 |
| ENST00000422325 | ENSG00000227124 | ZNF717 | 3:75758793-75834734 | Protein_coding_from_Ensembl | 2.09245 | 0.916321 | 0.0007 |
| ENST00000400845 | ENSG00000227124 | ZNF717 | 3:75758793-75834734 | Protein_coding_from_Ensembl | 0.383821 | 0.957464 | 0.0181 |
| ENST00000477374 | ENSG00000227124 | ZNF717 | 3:75758793-75834734 | Protein_coding_from_Ensembl | 2.72976 | 1.23384 | 0.0208 |
| ENST00000469144 | ENSG00000228300 | C19orf24 | 19:1275025-1279248 | Protein_coding_from_Ensembl | 0.964349 | 3.55969 | 0.02575 |
| ENST00000570259 | ENSG00000230989 | HSBP1 | 16:83841447-83853342 | Protein_coding_from_Ensembl | 1.32962 | 3.29266 | 0.0132 |
| ENST00000419277 | ENSG00000231389 | HLA-DPA1 | 6:33032345-33115840 | Protein_coding_from_Ensembl | 1.26544 | 0.340569 | 0.034 |
| ENST00000426633 | ENSG00000231925 | TAPBP | 6:33267470-33282164 | Protein_coding_from_Ensembl | 1.31008 | 0.341406 | 0.0194 |
| ENST00000436147 | ENSG00000233436 | BTBD18 | 11:57479994-57587018 | Protein_coding_from_Ensembl | 1.66565 | 0.451802 | 0.00205 |
| ENST00000422652 | ENSG00000233436 | BTBD18 | 11:57479994-57587018 | Protein_coding_from_Ensembl | 0.00819471 | 0.875777 | 0.02585 |
| ENST00000434824 | ENSG00000235631 | RNF148 | 7:121958480-122526813 | Protein_coding_from_Ensembl | 2.07178 | 0.785896 | 0.01775 |
| ENST00000432999 | ENSG00000236287 | ZBED5 | 11:10830843-10932005 | Protein_coding_from_Ensembl | 4.48918 | 9.12569 | 5.00E-05 |
| ENST00000409738 | ENSG00000239306 | RBM14 | 11:66384052-66448988 | Protein_coding_from_Ensembl | 10.6809 | 1.42271 | 0.0418 |
| ENST00000378875 | ENSG00000239382 | ALKBH6 | 19:36494208-36505141 | Protein_coding_from_Ensembl | 0.905321 | 2.37826 | 0.02555 |
| ENST00000524205 | ENSG00000239704 | CDRT4 | 17:15339331-15466945 | Protein_coding_from_Ensembl | 2.4159 | 5.69901 | 0.0218 |
| ENST00000375864 | ENSG00000240053 | LY6G5B | 6:31629005-31641553 | Protein_coding_from_Ensembl | 2.96747 | 1.26699 | 0.0001 |
| ENST00000481970 | ENSG00000240303 | ACAD11 | 3:132276981-132593067 | Protein_coding_from_Ensembl | 0.378971 | 1.18409 | 0.02865 |
| ENST00000409264 | ENSG00000240344 | PPIL3 | 2:201735629-201754026 | Protein_coding_from_Ensembl | 1.83446 | 4.89703 | 0.01405 |
| ENST00000338592 | ENSG00000241258 | CRCP | 7:65235900-66057999 | Protein_coding_from_Ensembl | 0.58653 | 2.86079 | 0.0084 |
| ENST00000442966 | ENSG00000241370 | RPP21 | 6:30201815-30314661 | Protein_coding_from_Ensembl | 6.25633 | 2.03203 | 0.02745 |
| ENST00000480388 | ENSG00000241978 | AKAP2 | 9:112401575-112938715 | Protein_coding_from_Ensembl | 3.11434 | 1.49609 | 0.0014 |
| ENST00000453516 | ENSG00000242247 | ARFGAP3 | 22:43192507-43411151 | Protein_coding_from_Ensembl | 6.82385 | 3.01711 | 0.00425 |
| ENST00000460685 | ENSG00000242498 | C15orf38 | 15:90373830-90456188 | Protein_coding_from_Ensembl | 0.456532 | 1.47486 | 0.00765 |
| ENST00000545866 | ENSG00000242732 | RGAG4 | X:71130937-71363424 | Protein_coding_from_Ensembl | 0.36523 | 2.0649 | 5.00E-05 |
| ENST00000603053 | ENSG00000242950 | ERVW-1 | 7:92076761-92157845 | Protein_coding_from_Ensembl | 0.610481 | 1.24029 | 0.0182 |
| ENST00000424046 | ENSG00000243156 | MICAL3 | 22:18270414-18507325 | Protein_coding_from_Ensembl | 2.31083 | 5.94548 | 0.03605 |
| ENST00000379717 | ENSG00000243943 | ZNF512 | 2:27805896-27917840 | Protein_coding_from_Ensembl | 2.39938 | 0.13517 | 0.0045 |
| ENST00000556601 | ENSG00000243943 | ZNF512 | 2:27805896-27917840 | Protein_coding_from_Ensembl | 1.12277 | 0.375426 | 0.04315 |
| ENST00000372723 | ENSG00000244274 | DBNDD2 | 20:43990576-44039250 | Protein_coding_from_Ensembl | 1.02457 | 2.24211 | 0.0363 |
| ENST00000504329 | ENSG00000248592 | TMEM110-MUSTN1 | 3:52846990-52931612 | Protein_coding_from_Ensembl | 0.209187 | 1.28096 | 0.0324 |
| ENST00000514466 | ENSG00000248592 | TMEM110-MUSTN1 | 3:52846990-52931612 | Protein_coding_from_Ensembl | 5.44857 | 1.56771 | 0.00575 |
| ENST00000293826 | ENSG00000248871 | TNFSF12-TNFSF13 | 17:7452207-7465000 | Protein_coding_from_Ensembl | 0.99801 | 2.33202 | 0.00685 |
| ENST00000413834 | ENSG00000248919 | ATP5J2-PTCD1 | 7:98923520-99063954 | Protein_coding_from_Ensembl | 0.929897 | 2.02185 | 0.00615 |
| ENST00000426595 | ENSG00000249773 | MRPS17 | 7:55954969-56067874 | Protein_coding_from_Ensembl | 1.27241 | 0.537171 | 0.03935 |
| ENST00000282382 | ENSG00000251201 | TMED7-TICAM2 | 5:114914338-114968689 | Protein_coding_from_Ensembl | 0.352665 | 1.33462 | 0.00145 |
| ENST00000445220 | ENSG00000251322 | SHANK3 | 22:51110332-51171726 | Protein_coding_from_Ensembl | 4.25928 | 1.64643 | 5.00E-05 |
| ENST00000593142 | ENSG00000254004 | ZNF260 | 19:36934262-37119499 | Protein_coding_from_Ensembl | 3.12024 | 1.23319 | 5.00E-05 |
| ENST00000453114 | ENSG00000254986 | DPP3 | 11:66234215-66313709 | Protein_coding_from_Ensembl | 0.153052 | 3.16578 | 0.0174 |
| ENST00000445861 | ENSG00000256040 | PAPPA-AS1 | 9:118916070-119164601 | Protein_coding_from_Ensembl | 0.240883 | 1.78361 | 0.0072 |
| ENST00000590612 | ENSG00000256294 | ZNF225 | 19:44598491-44637027 | Protein_coding_from_Ensembl | 0.408474 | 1.68421 | 0.0027 |
| ENST00000472726 | ENSG00000256500 | RP11-73M18.2 | 14:104019757-104181841 | Protein_coding_from_Ensembl | 1.00222 | 2.93432 | 0.00085 |
| ENST00000586157 | ENSG00000257103 | LSM14A | 19:34663408-34720420 | Protein_coding_from_Ensembl | 1.47568 | 2.98631 | 0.0349 |
| ENST00000437600 | ENSG00000257923 | CUX1 | 7:101458958-101927249 | Protein_coding_from_Ensembl | 1.33058 | 0.359066 | 0.0019 |
| ENST00000288022 | ENSG00000258429 | PDF | 16:69139466-69442474 | Protein_coding_from_Ensembl | 1.7938 | 3.58906 | 0.02945 |
| ENST00000370899 | ENSG00000259030 | FPGT-TNNI3K | 1:74663895-75010112 | Protein_coding_from_Ensembl | 0.476614 | 1.12627 | 0.018 |
| ENST00000578584 | ENSG00000265118 | CTD-2370N5.3 | 17:28900488-29709134 | Protein_coding_from_Ensembl | 1.96644 | 7.63338 | 0.00165 |
| ENST00000591834 | ENSG00000267281 | RP11-793H13.10 | 12:53900471-54020199 | Protein_coding_from_Ensembl | 2.06052 | 0.793109 | 0.01105 |
| ENST00000593352 | ENSG00000268302 | AL035252.1 | 20:25165309-25207370 | Protein_coding_from_Ensembl | 6.91465 | 20.754 | 0.0344 |
| ENST00000316676 | ENSG00000269891 | ARHGAP19-SLIT1 | 10:98757794-99052413 | Protein_coding_from_Ensembl | 3.46996 | 1.19863 | 0.0012 |
| ENST00000608209 | ENSG00000272962 | SLC5A3 | 21:35445523-35734378 | Protein_coding_from_Ensembl | 3.6193 | 8.24439 | 5.00E-05 |
| TCONS_00108277 | XLOC_018675 | - | 13:49270748-49283698 | Protein_from_predicted | 0.836781 | 0.364068 | 0.0407 |
| TCONS_00149136 | XLOC_025545 | - | 16:903633-1031663 | Protein_from_predicted | 2.3416 | 1.03587 | 5.00E-05 |
| TCONS_00158700 | XLOC_026749 | - | 16:88489840-88507195 | Protein_from_predicted | 1.3885 | 0.624566 | 5.00E-05 |
| TCONS_00282757 | XLOC_045797 | - | 22:32707698-32781618 | Protein_from_predicted | 1.58533 | 0.0617401 | 5.00E-05 |
| TCONS_00353248 | XLOC_057946 | - | 5:151121876-151192346 | Protein_from_predicted | 0.669061 | 2.40447 | 0.0099 |
