# Supplementary material for: Genome-Wide Identification of Long Noncoding RNAs in Human Intervertebral Disc Degeneration by RNA Sequencing
Source: Hindawi journal article supplement (doi:10.1155/2016/3684875), 2016-01-01
Supplement: f7 [file 3684875.f7.docx]

| **lncRNA ID** | **target gene** | **lncRNA target symbol** |
| --- | --- | --- |
| ENST00000522484 | ENST00000358755 | *FZD6* |
| ENST00000522484 | ENST00000540287 | *FZD6* |
| ENST00000522484 | ENST00000523739 | *FZD6* |
| ENST00000522484 | ENST00000522566 | *FZD6* |
| UCSC_TCONS_l2_00003188 | ENST00000285605 | *MARVELD1* |
| ENST00000436674 | ENST00000403210 | *TMEM184B* |
| ENST00000436674 | ENST00000361906 | *TMEM184B* |
| ENST00000436674 | ENST00000361684 | *TMEM184B* |
| ENST00000431029 | ENST00000430760 | *CDK14* |
| ENST00000431029 | ENST00000449528 | *CDK14* |
| ENST00000431029 | ENST00000456689 | *CDK14* |
| ENST00000431029 | ENST00000380050 | *CDK14* |
| ENST00000431029 | ENST00000406263 | *CDK14* |
| ENST00000431029 | ENST00000265741 | *CDK14* |
| ENST00000431029 | ENST00000446224 | *CDK14* |
| ENST00000431029 | ENST00000436577 | *CDK14* |
| ENST00000431029 | ENST00000446790 | *CDK14* |
| NR_073577 | ENST00000569038 | *USP10* |
| NR_073577 | ENST00000570191 | *USP10* |
| NR_073577 | ENST00000570053 | *USP10* |
| NR_073577 | ENST00000562283 | *USP10* |
| NR_073577 | ENST00000563892 | *USP10* |
| NR_073577 | ENST00000567526 | *USP10* |
| NR_073577 | ENST00000219473 | *USP10* |
| NR_073577 | ENST00000569925 | *USP10* |
| ENST00000495244 | ENST00000336617 | *RNASEH2B* |
| ENST00000495244 | ENST00000422660 | *RNASEH2B* |
| ENST00000522164 | ENST00000519973 | *SLC25A37* |
| ENST00000522164 | ENST00000523930 | *SLC25A37* |
| ENST00000461627 | ENST00000419386 | *ARRDC1* |
| ENST00000461627 | ENST00000371421 | *ARRDC1* |
| ENST00000461627 | ENST00000431925 | *ARRDC1* |
| NONHSAT087601 | ENST00000432408 | *CRBN* |
| NONHSAT087601 | ENST00000231948 | *CRBN* |
| NONHSAT087601 | ENST00000424814 | *CRBN* |
| ENST00000466828 | ENST00000369764 | *OBFC1* |
| ENST00000466828 | ENST00000224950 | *OBFC1* |
| ENST00000566352 | ENST00000562439 | *RSPRY1* |
| ENST00000566352 | ENST00000562959 | *RSPRY1* |
| ENST00000566352 | ENST00000394420 | *RSPRY1* |
| ENST00000566352 | ENST00000564435 | *RSPRY1* |
| ENST00000566352 | ENST00000568505 | *RSPRY1* |
| ENST00000566352 | ENST00000537866 | *RSPRY1* |
| ENST00000566352 | ENST00000561641 | *RSPRY1* |
| NR_001587 | ENST00000358951 | *RAB3GAP2* |
| ENST00000461474 | ENST00000234453 | *PLEKHA3* |
| ENST00000478678 | ENST00000375050 | *PBX2* |
| NONHSAT093923 | ENST00000543006 | *LPP* |
| NONHSAT093923 | ENST00000312675 | *LPP* |
| ENST00000460681 | ENST00000328771 | *DHX34* |
| ENST00000368366 | ENST00000350210 | *FAM189B* |
| ENST00000368366 | ENST00000361361 | *FAM189B* |
| ENST00000368366 | ENST00000368368 | *FAM189B* |
| ENST00000368366 | ENST00000491082 | *FAM189B* |
| ENST00000589427 | ENST00000588724 | *KANK2* |
| ENST00000589427 | ENST00000586659 | *KANK2* |
| ENST00000589427 | ENST00000432929 | *KANK2* |
| ENST00000589427 | ENST00000589359 | *KANK2* |
| ENST00000548989 | ENST00000483017 | *CRIP2* |
| ENST00000548989 | ENST00000329146 | *CRIP2* |
| ENST00000548989 | ENST00000550577 | *CRIP2* |
| ENST00000548989 | ENST00000538259 | *CRIP2* |
| ENST00000583850 | ENST00000356839 | *ACADVL* |
| ENST00000583850 | ENST00000350303 | *ACADVL* |
| ENST00000583850 | ENST00000579546 | *ACADVL* |
| ENST00000583850 | ENST00000543245 | *ACADVL* |
| ENST00000583850 | ENST00000542255 | *ACADVL* |
| NONHSAG027323 | ENST00000451130 | *EIF2B4* |
| NONHSAG027323 | ENST00000359541 | *GTF3C2* |
| NONHSAG027323 | ENST00000264720 | *GTF3C2* |
| NONHSAG027323 | ENST00000347454 | *EIF2B4* |
| NONHSAG027323 | ENST00000457748 | *GTF3C2* |
| NONHSAG027323 | ENST00000493344 | *EIF2B4* |
| NONHSAG027323 | ENST00000423998 | *GTF3C2* |
| NONHSAG027323 | ENST00000445933 | *EIF2B4* |
| ENST00000546000 | ENST00000542447 | *CADM1* |
| ENST00000546000 | ENST00000536727 | *CADM1* |
| ENST00000546000 | ENST00000545380 | *CADM1* |
| ENST00000546000 | ENST00000452722 | *CADM1* |
| ENST00000546000 | ENST00000537058 | *CADM1* |
| ENST00000546000 | ENST00000331581 | *CADM1* |
| ENST00000557303 | ENST00000520328 | *C14ORF159* |
| ENST00000557303 | ENST00000525393 | *C14ORF159* |
| ENST00000557303 | ENST00000412671 | *C14ORF159* |
| ENST00000557303 | ENST00000428926 | *C14ORF159* |
| ENST00000557303 | ENST00000256324 | *C14ORF159* |
| ENST00000557303 | ENST00000523816 | *C14ORF159* |
| ENST00000557303 | ENST00000522816 | *C14ORF159* |
| ENST00000557303 | ENST00000523771 | *C14ORF159* |
| ENST00000557303 | ENST00000518868 | *C14ORF159* |
| ENST00000557303 | ENST00000517518 | *C14ORF159* |
| ENST00000557303 | ENST00000521077 | *C14ORF159* |
| ENST00000557303 | ENST00000522322 | *C14ORF159* |
| ENST00000489697 | ENST00000353383 | *RAI1* |
| ENST00000489697 | ENST00000471135 | *RAI1* |
| ENST00000570985 | ENST00000358514 | *PSMB10* |
| ENST00000570985 | ENST00000574576 | *PSMB10* |
| ENST00000486211 | ENST00000264951 | *XRN1* |
| ENST00000486211 | ENST00000392981 | *XRN1* |
| ENST00000486211 | ENST00000477237 | *XRN1* |
| ENST00000486211 | ENST00000463916 | *XRN1* |
| ENST00000486211 | ENST00000544157 | *XRN1* |
| ENST00000555659 | ENST00000553878 | *CKB* |
| ENST00000555659 | ENST00000348956 | *CKB* |
| ENST00000555659 | ENST00000557530 | *CKB* |
| NONHSAG015791 | ENST00000298912 | *CLMN* |
| NONHSAG015791 | ENST00000555615 | *CLMN* |
| ENST00000560144 | ENST00000558762 | *IGF1R* |
| ENST00000560144 | ENST00000268035 | *IGF1R* |
| NR_036680 | ENST00000404479 | *AVL9* |
| NONHSAT122723 | ENST00000222399 | *LAMB1* |
| NONHSAT122723 | ENST00000393561 | *LAMB1* |
| ENST00000460515 | ENST00000486459 | *GK5* |
| ENST00000460515 | ENST00000392993 | *GK5* |
| ENST00000476742 | ENST00000337331 | *NPHP3* |
| ENST00000476742 | ENST00000326682 | *NPHP3* |
| ENST00000527428 | ENST00000524931 | *PTS* |
| ENST00000527428 | ENST00000280362 | *PTS* |
| ENST00000527428 | ENST00000525803 | *PTS* |
| ENST00000568903 | ENST00000315183 | *TNRC6A* |
| ENST00000568903 | ENST00000395799 | *TNRC6A* |
| ENST00000568903 | ENST00000450465 | *TNRC6A* |
| ENST00000578408 | ENST00000318217 | *MYO1D* |
| ENST00000578408 | ENST00000394649 | *MYO1D* |
| NR_104448 | ENST00000467177 | *SLC22A23* |
| NR_104448 | ENST00000380298 | *SLC22A23* |
| NR_104448 | ENST00000490273 | *SLC22A23* |
| NR_104448 | ENST00000485307 | *SLC22A23* |
| NR_104448 | ENST00000406686 | *SLC22A23* |
| NR_104448 | ENST00000380302 | *SLC22A23* |
| NR_104448 | ENST00000436008 | *SLC22A23* |
| ENST00000478903 | ENST00000265239 | *IQCG* |
| ENST00000478903 | ENST00000455191 | *IQCG* |
| NR_034146 | ENST00000249396 | *SIRT2* |
| NR_034146 | ENST00000392081 | *SIRT2* |
| NR_034146 | ENST00000447739 | *SIRT2* |
| NR_034146 | ENST00000407552 | *SIRT2* |
| NR_034146 | ENST00000437828 | *SIRT2* |
| NR_034146 | ENST00000358931 | *SIRT2* |
| NR_034146 | ENST00000414941 | *SIRT2* |
| NR_034146 | ENST00000381766 | *SIRT2* |
| ENST00000520623 | ENST00000517536 | *EPHX2* |
| ENST00000520623 | ENST00000521400 | *EPHX2* |
| ENST00000520623 | ENST00000521780 | *EPHX2* |
| ENST00000520623 | ENST00000518379 | *EPHX2* |
| ENST00000520623 | ENST00000518328 | *EPHX2* |
| ENST00000520623 | ENST00000380476 | *EPHX2* |
| ENST00000520623 | ENST00000521684 | *EPHX2* |
| ENST00000431309 | ENST00000367545 | *UTRN* |
| ENST00000431309 | ENST00000433557 | *UTRN* |
| ENST00000495793 | ENST00000430436 | *RALGAPA2* |
| ENST00000495793 | ENST00000202677 | *RALGAPA2* |
| ENST00000602751 | ENST00000349841 | *MYNN* |
| ENST00000602751 | ENST00000544106 | *MYNN* |
| ENST00000602751 | ENST00000392733 | *MYNN* |
| ENST00000602751 | ENST00000356716 | *MYNN* |
| ENST00000495995 | ENST00000373830 | *TRNAU1AP* |
| ENST00000082468 | ENST00000427334 | *BTN3A1* |
| ENST00000082468 | ENST00000289361 | *BTN3A1* |
| ENST00000082468 | ENST00000476549 | *BTN3A1* |
| ENST00000082468 | ENST00000425234 | *BTN3A1* |
| ENST00000082468 | ENST00000414912 | *BTN3A1* |
| ENST00000082468 | ENST00000450085 | *BTN3A1* |
| ENST00000082468 | ENST00000506698 | *BTN3A1* |
| ENST00000514931 | ENST00000514527 | *RAI14* |
| ENST00000514931 | ENST00000512305 | *RAI14* |
| ENST00000514931 | ENST00000503673 | *RAI14* |
| ENST00000514931 | ENST00000506376 | *RAI14* |
| ENST00000514931 | ENST00000265109 | *RAI14* |
| ENST00000514931 | ENST00000512625 | *RAI14* |
| ENST00000514931 | ENST00000514036 | *RAI14* |
| ENST00000514931 | ENST00000514873 | *RAI14* |
| ENST00000514931 | ENST00000515799 | *RAI14* |
| ENST00000514931 | ENST00000513974 | *RAI14* |
| ENST00000514931 | ENST00000397449 | *RAI14* |
| ENST00000514931 | ENST00000512629 | *RAI14* |
| ENST00000514931 | ENST00000508315 | *RAI14* |
| ENST00000514931 | ENST00000504052 | *RAI14* |
| ENST00000514931 | ENST00000428746 | *RAI14* |
| ENST00000483767 | ENST00000327044 | *NOC2L* |
| ENST00000522900 | ENST00000518074 | *SPIDR* |
| ENST00000522900 | ENST00000524006 | *SPIDR* |
| ENST00000522900 | ENST00000541342 | *SPIDR* |
| ENST00000522900 | ENST00000297423 | *SPIDR* |
| ENST00000417788 | ENST00000406385 | *PPIL2* |
| ENST00000417788 | ENST00000492445 | *PPIL2* |
| ENST00000417788 | ENST00000412327 | *PPIL2* |
| ENST00000417788 | ENST00000398831 | *PPIL2* |
| ENST00000417788 | ENST00000458567 | *PPIL2* |
| ENST00000417788 | ENST00000335025 | *PPIL2* |
| ENST00000417788 | ENST00000456792 | *PPIL2* |
| ENST00000503422 | ENST00000265112 | *TARS* |
| ENST00000503422 | ENST00000455217 | *TARS* |
| ENST00000503422 | ENST00000414361 | *TARS* |
| ENST00000503422 | ENST00000502553 | *TARS* |
| ENST00000503422 | ENST00000541634 | *TARS* |
| ENST00000416093 | ENST00000542177 | *RAF1* |
| ENST00000416093 | ENST00000251849 | *RAF1* |
| ENST00000416093 | ENST00000432427 | *RAF1* |
| ENST00000416093 | ENST00000534997 | *RAF1* |
| ENST00000416093 | ENST00000442415 | *RAF1* |
| ENST00000544378 | ENST00000572272 | *NLRP1* |
| ENST00000544378 | ENST00000576905 | *NLRP1* |
| ENST00000544378 | ENST00000577119 | *NLRP1* |
| ENST00000544378 | ENST00000354411 | *NLRP1* |
| ENST00000544378 | ENST00000262467 | *NLRP1* |
| ENST00000544378 | ENST00000269280 | *NLRP1* |
| ENST00000544378 | ENST00000345221 | *NLRP1* |
| UCSC_TCONS_00009943 | ENST00000507393 | *ZNF131* |
| ENST00000556648 | ENST00000538838 | *TMEM260* |
| ENST00000556648 | ENST00000261556 | *TMEM260* |
| ENST00000556648 | ENST00000555046 | *TMEM260* |
| ENST00000556648 | ENST00000536419 | *TMEM260* |
| ENST00000470814 | ENST00000438754 | *5-Sep* |
| ENST00000470814 | ENST00000383045 | *5-Sep* |
| ENST00000470814 | ENST00000395109 | *5-Sep* |
| ENST00000470814 | ENST00000412544 | *5-Sep* |
| ENST00000470814 | ENST00000406395 | *5-Sep* |
| ENST00000470814 | ENST00000455784 | *5-Sep* |
| ENST00000470814 | ENST00000431124 | *5-Sep* |
| ENST00000470814 | ENST00000413258 | *5-Sep* |
| ENST00000470814 | ENST00000366425 | *GP1BB* |
| ENST00000289779 | ENST00000368026 | *F11R* |
| ENST00000289779 | ENST00000318289 | *TSTD1* |
| ENST00000289779 | ENST00000537746 | *F11R* |
| ENST00000289779 | ENST00000368024 | *TSTD1* |
| ENST00000289779 | ENST00000423014 | *TSTD1* |
| ENST00000289779 | ENST00000368023 | *TSTD1* |
| ENST00000460031 | ENST00000397054 | *LEPRE1* |
| ENST00000460031 | ENST00000296388 | *LEPRE1* |
| ENST00000460031 | ENST00000447502 | *LEPRE1* |
| ENST00000460031 | ENST00000372526 | *LEPRE1* |
| ENST00000460031 | ENST00000236040 | *LEPRE1* |
| NONHSAT056661 | ENST00000583025 | *SLC16A3* |
| ENST00000557082 | ENST00000553739 | *PPP1R13B* |
| ENST00000557082 | ENST00000202556 | *PPP1R13B* |
| ENST00000557082 | ENST00000555734 | *PPP1R13B* |
| ENST00000557082 | ENST00000423488 | *PPP1R13B* |
| ENST00000569558 | ENST00000564392 | *GAS8* |
| ENST00000569558 | ENST00000536122 | *GAS8* |
| ENST00000569558 | ENST00000561675 | *GAS8* |
| ENST00000569558 | ENST00000563936 | *GAS8* |
| ENST00000569558 | ENST00000268699 | *GAS8* |
| ENST00000493682 | ENST00000320755 | *COL9A1* |
| ENST00000493682 | ENST00000370499 | *COL9A1* |
| ENST00000493682 | ENST00000357250 | *COL9A1* |
| ENST00000320153 | ENST00000345034 | *RSC1A1* |
| ENST00000320153 | ENST00000480945 | *DDI2* |
| ENST00000538548 | ENST00000537164 | *SFSWAP* |
| ENST00000538548 | ENST00000541286 | *SFSWAP* |
| ENST00000538548 | ENST00000535236 | *SFSWAP* |
| ENST00000538548 | ENST00000261674 | *SFSWAP* |
| NONHSAT120240 | ENST00000181839 | *CDK13* |
| ENST00000483350 | ENST00000443081 | *RBM6* |
| ENST00000483350 | ENST00000266022 | *RBM6* |
| ENST00000483350 | ENST00000442092 | *RBM6* |
| ENST00000483350 | ENST00000422955 | *RBM6* |
| ENST00000483350 | ENST00000539992 | *RBM6* |
| ENST00000483350 | ENST00000446471 | *RBM6* |
| ENST00000499008 | ENST00000525950 | *BDNF* |
| ENST00000499008 | ENST00000533131 | *BDNF* |
| ENST00000499008 | ENST00000525528 | *BDNF* |
| ENST00000499008 | ENST00000533246 | *BDNF* |
| ENST00000499008 | ENST00000418212 | *BDNF* |
| ENST00000499008 | ENST00000420794 | *BDNF* |
| ENST00000499008 | ENST00000439476 | *BDNF* |
| ENST00000499008 | ENST00000438929 | *BDNF* |
| ENST00000499008 | ENST00000395983 | *BDNF* |
| ENST00000499008 | ENST00000395980 | *BDNF* |
| ENST00000499008 | ENST00000530861 | *BDNF* |
| ENST00000499008 | ENST00000314915 | *BDNF* |
| ENST00000499008 | ENST00000395981 | *BDNF* |
| ENST00000499008 | ENST00000532997 | *BDNF* |
| ENST00000499008 | ENST00000395978 | *BDNF* |
| ENST00000499008 | ENST00000356660 | *BDNF* |
| ENST00000499008 | ENST00000395986 | *BDNF* |
| ENST00000562379 | ENST00000568826 | *METTL9* |
| ENST00000562379 | ENST00000567404 | *METTL9* |
| ENST00000562379 | ENST00000569290 | *METTL9* |
| ENST00000562379 | ENST00000562961 | *METTL9* |
| ENST00000562379 | ENST00000358154 | *METTL9* |
| ENST00000562379 | ENST00000396014 | *METTL9* |
| ENST00000494912 | ENST00000351413 | *TAZ* |
| ENST00000494912 | ENST00000439735 | *TAZ* |
| ENST00000494912 | ENST00000299328 | *TAZ* |
| ENST00000494912 | ENST00000475699 | *TAZ* |
| ENST00000494912 | ENST00000454722 | *TAZ* |
| ENST00000494912 | ENST00000369790 | *TAZ* |
| ENST00000494912 | ENST00000369776 | *TAZ* |
| ENST00000494912 | ENST00000350743 | *TAZ* |
| ENST00000595049 | ENST00000379803 | *SIN3B* |
| ENST00000595049 | ENST00000595541 | *SIN3B* |
| ENST00000595049 | ENST00000248054 | *SIN3B* |
| ENST00000549585 | ENST00000551310 | *ATP2B1* |
| ENST00000549585 | ENST00000348959 | *ATP2B1* |
| ENST00000549585 | ENST00000428670 | *ATP2B1* |
| ENST00000549585 | ENST00000261173 | *ATP2B1* |
| ENST00000549585 | ENST00000359142 | *ATP2B1* |
| ENST00000572686 | ENST00000504102 | *SPOP* |
| ENST00000572686 | ENST00000347630 | *SPOP* |
| ENST00000572686 | ENST00000393328 | *SPOP* |
| ENST00000572686 | ENST00000393331 | *SPOP* |
| ENST00000572686 | ENST00000503676 | *SPOP* |
| ENST00000514498 | ENST00000513982 | *CPE* |
| ENST00000514498 | ENST00000402744 | *CPE* |
| ENST00000547872 | ENST00000552562 | *CBX5* |
| ENST00000547872 | ENST00000439541 | *CBX5* |
| ENST00000547872 | ENST00000550411 | *CBX5* |
| ENST00000547872 | ENST00000209875 | *CBX5* |
| ENST00000435606 | ENST00000361205 | *LDLRAD4* |
| ENST00000435606 | ENST00000587905 | *LDLRAD4* |
| ENST00000435606 | ENST00000592991 | *LDLRAD4* |
| ENST00000435606 | ENST00000399848 | *LDLRAD4* |
| ENST00000435606 | ENST00000587757 | *LDLRAD4* |
| ENST00000435606 | ENST00000586765 | *LDLRAD4* |
| ENST00000435606 | ENST00000593236 | *LDLRAD4* |
| ENST00000435606 | ENST00000585931 | *LDLRAD4* |
| ENST00000435606 | ENST00000359446 | *LDLRAD4* |
| ENST00000484829 | ENST00000334661 | *PLCD1* |
| ENST00000484829 | ENST00000463876 | *PLCD1* |
| ENST00000529580 | ENST00000312397 | *SART1* |
| ENST00000493991 | ENST00000337299 | *COL2A1* |
| ENST00000493991 | ENST00000380518 | *COL2A1* |
| ENST00000490222 | ENST00000370888 | *LRRC1* |
| ENST00000543809 | ENST00000381256 | *CCDC91* |
| ENST00000543809 | ENST00000536154 | *CCDC91* |
| ENST00000543809 | ENST00000381259 | *CCDC91* |
| ENST00000543809 | ENST00000542801 | *CCDC91* |
| ENST00000543809 | ENST00000541792 | *CCDC91* |
| ENST00000543809 | ENST00000539107 | *CCDC91* |
| ENST00000543809 | ENST00000306172 | *CCDC91* |
| ENST00000543809 | ENST00000543019 | *CCDC91* |
| ENST00000543809 | ENST00000545336 | *CCDC91* |
| ENST00000543809 | ENST00000543534 | *CCDC91* |
| ENST00000543809 | ENST00000538586 | *CCDC91* |
| ENST00000543809 | ENST00000535212 | *CCDC91* |
| ENST00000543809 | ENST00000540794 | *CCDC91* |
| ENST00000543809 | ENST00000542814 | *CCDC91* |
| ENST00000484161 | ENST00000419712 | *RAB34* |
| ENST00000484161 | ENST00000447716 | *RAB34* |
| ENST00000484161 | ENST00000353676 | *RAB34* |
| ENST00000484161 | ENST00000415040 | *RAB34* |
| ENST00000484161 | ENST00000395245 | *RAB34* |
| ENST00000484161 | ENST00000412625 | *RAB34* |
| ENST00000484161 | ENST00000453384 | *RAB34* |
| ENST00000484161 | ENST00000301043 | *RAB34* |
| ENST00000484161 | ENST00000583538 | *RAB34* |
| ENST00000484161 | ENST00000450529 | *RAB34* |
| ENST00000484161 | ENST00000395242 | *RAB34* |
| ENST00000484161 | ENST00000430132 | *RAB34* |
| ENST00000484161 | ENST00000395243 | *RAB34* |
| ENST00000484161 | ENST00000436730 | *RAB34* |
| ENST00000395463 | ENST00000467889 | *CALML4* |
| ENST00000395463 | ENST00000448060 | *CALML4* |
| ENST00000395463 | ENST00000562767 | *RP11-315D16.2* |
| ENST00000395463 | ENST00000540479 | *CALML4* |
| ENST00000395463 | ENST00000395465 | *CALML4* |
| ENST00000395463 | ENST00000354678 | *CALML4* |
| ENST00000595368 | ENST00000598725 | *SUPT5H* |
| ENST00000595368 | ENST00000402194 | *SUPT5H* |
| ENST00000595368 | ENST00000432763 | *SUPT5H* |
| ENST00000595368 | ENST00000601515 | *SUPT5H* |
| ENST00000595368 | ENST00000359191 | *SUPT5H* |
| ENST00000595368 | ENST00000594990 | *SUPT5H* |
| ENST00000595368 | ENST00000593727 | *SUPT5H* |
| ENST00000595368 | ENST00000594729 | *SUPT5H* |
| ENST00000595368 | ENST00000599117 | *SUPT5H* |
| ENST00000484078 | ENST00000464744 | *SUPT20H* |
| ENST00000484078 | ENST00000350612 | *SUPT20H* |
| ENST00000484078 | ENST00000542180 | *SUPT20H* |
| ENST00000484078 | ENST00000360252 | *SUPT20H* |
| ENST00000484078 | ENST00000469488 | *SUPT20H* |
| ENST00000484078 | ENST00000356185 | *SUPT20H* |
| ENST00000484078 | ENST00000475892 | *SUPT20H* |
| NONHSAT133403 | ENST00000288985 | *ERCC6L2* |
| NONHSAT031595 | ENST00000376874 | *RILPL1* |
| NR_046344 | ENST00000393235 | *CALHM2* |
| NR_046344 | ENST00000260743 | *CALHM2* |
| NR_046344 | ENST00000369788 | *CALHM2* |
| ENST00000469120 | ENST00000416804 | *HLA-DPB1* |
| ENST00000469120 | ENST00000535465 | *HLA-DPB1* |
| ENST00000469120 | ENST00000418931 | *HLA-DPB1* |
| ENST00000469120 | ENST00000428835 | *HLA-DPB1* |
| NR_073085 | ENST00000550577 | *CRIP2* |
| NR_073085 | ENST00000329146 | *CRIP2* |
| NR_073085 | ENST00000483017 | *CRIP2* |
| NR_073085 | ENST00000538259 | *CRIP2* |
| ENST00000522873 | ENST00000517668 | *ST3GAL1* |
| ENST00000522873 | ENST00000523855 | *ST3GAL1* |
| ENST00000522873 | ENST00000523634 | *ST3GAL1* |
| ENST00000522873 | ENST00000523854 | *ST3GAL1* |
| ENST00000522873 | ENST00000319914 | *ST3GAL1* |
| ENST00000522873 | ENST00000522652 | *ST3GAL1* |
| ENST00000522873 | ENST00000521180 | *ST3GAL1* |
| ENST00000522873 | ENST00000399640 | *ST3GAL1* |
| ENST00000522873 | ENST00000519924 | *ST3GAL1* |
| ENST00000515159 | ENST00000511233 | *SLC38A9* |
| ENST00000515159 | ENST00000515629 | *SLC38A9* |
| ENST00000515159 | ENST00000539768 | *SLC38A9* |
| ENST00000515159 | ENST00000318672 | *SLC38A9* |
| ENST00000515159 | ENST00000512595 | *SLC38A9* |
| ENST00000515159 | ENST00000512208 | *SLC38A9* |
| ENST00000515159 | ENST00000396865 | *SLC38A9* |
| ENST00000515159 | ENST00000416547 | *SLC38A9* |
| ENST00000467521 | ENST00000358935 | *5-Mar* |
| ENST00000533476 | ENST00000301935 | *UBXN1* |
| ENST00000533476 | ENST00000294119 | *UBXN1* |
| ENST00000533476 | ENST00000534176 | *UBXN1* |
| ENST00000533476 | ENST00000529640 | *UBXN1* |
| ENST00000533476 | ENST00000533000 | *UBXN1* |
| ENST00000490286 | ENST00000360534 | *DPP4* |
| ENST00000552760 | ENST00000412830 | *PWP1* |
| ENST00000552760 | ENST00000541166 | *PWP1* |
| ENST00000552760 | ENST00000547995 | *PWP1* |
| ENST00000473180 | ENST00000422390 | *BTBD3* |
| ENST00000473180 | ENST00000455911 | *BTBD3* |
| ENST00000473180 | ENST00000430557 | *BTBD3* |
| ENST00000473180 | ENST00000399006 | *BTBD3* |
| ENST00000473180 | ENST00000378226 | *BTBD3* |
| ENST00000473180 | ENST00000254977 | *BTBD3* |
| ENST00000473180 | ENST00000405977 | *BTBD3* |
| ENST00000520511 | ENST00000517956 | *FBXO32* |
| ENST00000520511 | ENST00000443022 | *FBXO32* |
| ENST00000469109 | ENST00000430864 | *LUC7L* |
| ENST00000450760 | ENST00000406870 | *BCL6* |
| NONHSAG001878 | ENST00000436586 | *FUBP1* |
| NONHSAG001878 | ENST00000370768 | *FUBP1* |
| NONHSAG001878 | ENST00000370767 | *FUBP1* |
| NR_038337 | ENST00000255174 | *OSER1* |
| ENST00000426347 | ENST00000418158 | *ZNF783* |
| ENST00000491738 | ENST00000404168 | *CMPK2* |
| ENST00000491738 | ENST00000256722 | *CMPK2* |
| ENST00000491738 | ENST00000458098 | *CMPK2* |
| ENST00000590421 | ENST00000240328 | *TBX2* |
| ENST00000602050 | ENST00000597410 | *AC004076.7* |
| ENST00000582745 | ENST00000580982 | *ENOSF1* |
| ENST00000582745 | ENST00000340116 | *ENOSF1* |
| ENST00000582745 | ENST00000383578 | *ENOSF1* |
| ENST00000582745 | ENST00000251101 | *ENOSF1* |
| ENST00000582745 | ENST00000319815 | *ENOSF1* |
| ENST00000484147 | ENST00000359785 | *PTPN22* |
| ENST00000484147 | ENST00000525799 | *PTPN22* |
| ENST00000484147 | ENST00000538253 | *PTPN22* |
| ENST00000484147 | ENST00000460620 | *PTPN22* |
| ENST00000484147 | ENST00000420377 | *PTPN22* |
| ENST00000484147 | ENST00000528414 | *PTPN22* |
| ENST00000415383 | ENST00000434538 | *MMS19* |
| ENST00000415383 | ENST00000437002 | *MMS19* |
| ENST00000415383 | ENST00000327277 | *MMS19* |
| ENST00000415383 | ENST00000438925 | *MMS19* |
| ENST00000415383 | ENST00000327238 | *MMS19* |
| ENST00000415383 | ENST00000355839 | *MMS19* |
| ENST00000415383 | ENST00000444411 | *MMS19* |
| ENST00000415383 | ENST00000422685 | *MMS19* |
| ENST00000415383 | ENST00000370782 | *MMS19* |
| ENST00000489444 | ENST00000370481 | *GBP3* |
| ENST00000489444 | ENST00000564665 | *GBP3* |
| ENST00000489444 | ENST00000461384 | *GBP3* |
| ENST00000489444 | ENST00000445969 | *GBP3* |
| ENST00000505656 | ENST00000356488 | *SPATA20* |
| ENST00000505656 | ENST00000393244 | *SPATA20* |
| ENST00000505656 | ENST00000006658 | *SPATA20* |
| ENST00000554600 | ENST00000554975 | *SHMT2* |
| ENST00000554600 | ENST00000557529 | *SHMT2* |
| ENST00000554600 | ENST00000414700 | *SHMT2* |
| ENST00000554600 | ENST00000555634 | *SHMT2* |
| ENST00000554600 | ENST00000557703 | *SHMT2* |
| ENST00000554600 | ENST00000556737 | *SHMT2* |
| ENST00000554600 | ENST00000553474 | *SHMT2* |
| ENST00000554600 | ENST00000449049 | *SHMT2* |
| ENST00000554600 | ENST00000328923 | *SHMT2* |
| ENST00000554600 | ENST00000554310 | *SHMT2* |
| ENST00000554600 | ENST00000556689 | *SHMT2* |
| ENST00000554600 | ENST00000557487 | *SHMT2* |
| ENST00000554600 | ENST00000555773 | *SHMT2* |
| ENST00000554600 | ENST00000553529 | *SHMT2* |
| ENST00000554600 | ENST00000393827 | *SHMT2* |
| ENST00000554600 | ENST00000557427 | *SHMT2* |
| ENST00000469232 | ENST00000337331 | *NPHP3* |
| ENST00000469232 | ENST00000343113 | *NPHP3* |
| ENST00000469232 | ENST00000326682 | *NPHP3* |
| ENST00000469232 | ENST00000383282 | *NPHP3* |
| NR_024091 | ENST00000316059 | *ZFP91* |
| NR_024091 | ENST00000361987 | *CNTF* |
| ENST00000563555 | ENST00000263026 | *EEF2K* |
| ENST00000498278 | ENST00000351298 | *PLD1* |
| ENST00000498278 | ENST00000418087 | *PLD1* |
| ENST00000498278 | ENST00000356327 | *PLD1* |
| ENST00000498278 | ENST00000340989 | *PLD1* |
| ENST00000498278 | ENST00000342215 | *PLD1* |
| ENST00000482229 | ENST00000393857 | *C3ORF17* |
| ENST00000482229 | ENST00000383675 | *C3ORF17* |
| ENST00000482229 | ENST00000314400 | *C3ORF17* |
| ENST00000463370 | ENST00000395802 | *VAPB* |
| ENST00000463370 | ENST00000475243 | *VAPB* |
| ENST00000506799 | ENST00000502464 | *NLN* |
| ENST00000506799 | ENST00000509935 | *NLN* |
| ENST00000506799 | ENST00000380985 | *NLN* |
| ENST00000506799 | ENST00000511299 | *NLN* |
| ENST00000532758 | ENST00000355091 | *GPAA1* |
| ENST00000532758 | ENST00000361036 | *GPAA1* |
| ENST00000532758 | ENST00000530258 | *GPAA1* |
| ENST00000532758 | ENST00000524418 | *GPAA1* |
| ENST00000532758 | ENST00000525087 | *GPAA1* |
| ENST00000497815 | ENST00000556210 | *CUX1* |
| ENST00000497815 | ENST00000292535 | *CUX1* |
| ENST00000497815 | ENST00000550008 | *CUX1* |
| ENST00000497815 | ENST00000546411 | *CUX1* |
| ENST00000497815 | ENST00000360264 | *CUX1* |
| ENST00000497815 | ENST00000547394 | *CUX1* |
| ENST00000497815 | ENST00000437600 | *CUX1* |
| ENST00000497815 | ENST00000393824 | *CUX1* |
| ENST00000497815 | ENST00000425244 | *CUX1* |
| ENST00000497815 | ENST00000292538 | *CUX1* |
| ENST00000497815 | ENST00000549414 | *CUX1* |
| ENST00000588281 | ENST00000589689 | *PGS1* |
| ENST00000588281 | ENST00000329897 | *PGS1* |
| ENST00000588281 | ENST00000586019 | *PGS1* |
| ENST00000588281 | ENST00000586355 | *PGS1* |
| ENST00000588281 | ENST00000262764 | *PGS1* |
| ENST00000588281 | ENST00000592043 | *PGS1* |
| ENST00000588281 | ENST00000587356 | *PGS1* |
| ENST00000565443 | ENST00000569795 | *PARP6* |
| ENST00000565443 | ENST00000419739 | *PARP6* |
| ENST00000565443 | ENST00000569173 | *PARP6* |
| ENST00000565443 | ENST00000566844 | *PARP6* |
| ENST00000565443 | ENST00000260376 | *PARP6* |
| ENST00000565443 | ENST00000287196 | *PARP6* |
| ENST00000565443 | ENST00000568360 | *PARP6* |
| ENST00000565443 | ENST00000567974 | *PARP6* |
| ENST00000465906 | ENST00000379888 | *RBM17* |
| ENST00000465906 | ENST00000446108 | *RBM17* |
| ENST00000527133 | ENST00000263309 | *CLNS1A* |
| ENST00000527133 | ENST00000525428 | *CLNS1A* |
| ENST00000527133 | ENST00000528364 | *CLNS1A* |
| ENST00000527133 | ENST00000525064 | *CLNS1A* |
| ENST00000527133 | ENST00000532069 | *CLNS1A* |
| ENST00000483285 | ENST00000429801 | *NUP98* |
| ENST00000483285 | ENST00000355260 | *NUP98* |
| ENST00000483285 | ENST00000324932 | *NUP98* |
| ENST00000483285 | ENST00000359171 | *NUP98* |
| ENST00000525244 | ENST00000263360 | *EED* |
| ENST00000525244 | ENST00000534595 | *EED* |
| ENST00000525244 | ENST00000327320 | *EED* |
| ENST00000525244 | ENST00000528180 | *EED* |
| ENST00000525244 | ENST00000527888 | *EED* |
| ENST00000525244 | ENST00000351625 | *EED* |
| ENST00000505838 | ENST00000503230 | *SLC9B2* |
| ENST00000505838 | ENST00000503103 | *SLC9B2* |
| ENST00000505838 | ENST00000362026 | *SLC9B2* |
| ENST00000505838 | ENST00000394785 | *SLC9B2* |
| ENST00000505838 | ENST00000339611 | *SLC9B2* |
| ENST00000505838 | ENST00000503818 | *SLC9B2* |
| ENST00000476828 | ENST00000458307 | *AMT* |
| ENST00000476828 | ENST00000427987 | *AMT* |
| ENST00000476828 | ENST00000395338 | *AMT* |
| ENST00000476828 | ENST00000273588 | *AMT* |
| ENST00000476828 | ENST00000538581 | *AMT* |
| ENST00000476828 | ENST00000546031 | *AMT* |
| ENST00000476828 | ENST00000430521 | *AMT* |
| ENST00000463120 | ENST00000370471 | *FMR1* |
| ENST00000463120 | ENST00000370477 | *FMR1* |
| ENST00000463120 | ENST00000370470 | *FMR1* |
| ENST00000463120 | ENST00000218200 | *FMR1* |
| ENST00000463120 | ENST00000440235 | *FMR1* |
| ENST00000463120 | ENST00000439526 | *FMR1* |
| ENST00000463120 | ENST00000370475 | *FMR1* |
| ENST00000491319 | ENST00000351288 | *SMPD4* |
| ENST00000491319 | ENST00000453750 | *SMPD4* |
| ENST00000491319 | ENST00000426662 | *SMPD4* |
| ENST00000491319 | ENST00000449159 | *SMPD4* |
| ENST00000491319 | ENST00000431183 | *SMPD4* |
| ENST00000491319 | ENST00000409031 | *SMPD4* |
| ENST00000491319 | ENST00000439886 | *SMPD4* |
| ENST00000491319 | ENST00000339679 | *SMPD4* |
| ENST00000491319 | ENST00000457039 | *SMPD4* |
| ENST00000491319 | ENST00000443958 | *SMPD4* |
| ENST00000491319 | ENST00000452225 | *SMPD4* |
| ENST00000545051 | ENST00000589634 | *SMAD7* |
| ENST00000545051 | ENST00000586093 | *SMAD7* |
| ENST00000545051 | ENST00000262158 | *SMAD7* |
| ENST00000545051 | ENST00000591805 | *SMAD7* |
| ENST00000488765 | ENST00000397030 | *MCF2L* |
| ENST00000488765 | ENST00000375601 | *MCF2L* |
| ENST00000488765 | ENST00000453297 | *MCF2L* |
| ENST00000488765 | ENST00000261963 | *MCF2L* |
| ENST00000488765 | ENST00000413354 | *MCF2L* |
| ENST00000488765 | ENST00000375608 | *MCF2L* |
| ENST00000488765 | ENST00000375604 | *MCF2L* |
| ENST00000488765 | ENST00000535094 | *MCF2L* |
| ENST00000488765 | ENST00000421756 | *MCF2L* |
| ENST00000488765 | ENST00000434480 | *MCF2L* |
| ENST00000488765 | ENST00000442652 | *MCF2L* |
| ENST00000488765 | ENST00000420013 | *MCF2L* |
| ENST00000488765 | ENST00000423482 | *MCF2L* |
| ENST00000488765 | ENST00000397017 | *MCF2L* |
| ENST00000464168 | ENST00000351842 | *USP4* |
| ENST00000464168 | ENST00000265560 | *USP4* |
| ENST00000464168 | ENST00000416417 | *USP4* |
| ENST00000464168 | ENST00000415188 | *USP4* |
| ENST00000465759 | ENST00000383794 | *CCDC174* |
| ENST00000465759 | ENST00000303688 | *CCDC174* |
| ENST00000331856 | ENST00000331593 | *BMP8A* |
| ENST00000472298 | ENST00000464470 | *N4BP2L1* |
| ENST00000472298 | ENST00000343281 | *N4BP2L1* |
| ENST00000472298 | ENST00000380133 | *N4BP2L1* |
| ENST00000472298 | ENST00000495479 | *N4BP2L1* |
| ENST00000472298 | ENST00000530622 | *N4BP2L1* |
| ENST00000472298 | ENST00000380139 | *N4BP2L1* |
| ENST00000472298 | ENST00000380130 | *N4BP2L1* |
| UCSC_TCONS_l2_00022199 | ENST00000296657 | *ANKRD33B* |
| ENST00000524495 | ENST00000533792 | *PPFIBP2* |
| ENST00000524495 | ENST00000528883 | *PPFIBP2* |
| ENST00000524495 | ENST00000530181 | *PPFIBP2* |
| ENST00000524495 | ENST00000299492 | *PPFIBP2* |
| ENST00000480525 | ENST00000334136 | *HDAC6* |
| ENST00000480525 | ENST00000444343 | *HDAC6* |
| ENST00000480525 | ENST00000376619 | *HDAC6* |
| ENST00000462212 | ENST00000429238 | *AP000304.12* |
| NR_027265 | ENST00000205061 | *GLG1* |
| NR_027265 | ENST00000447066 | *GLG1* |
| NR_027265 | ENST00000565474 | *GLG1* |
| NR_027265 | ENST00000565260 | *GLG1* |
| NR_027265 | ENST00000422840 | *GLG1* |
| ENST00000526067 | ENST00000532993 | *ARHGEF12* |
| ENST00000526067 | ENST00000397843 | *ARHGEF12* |
| ENST00000526067 | ENST00000356641 | *ARHGEF12* |
| ENST00000475564 | ENST00000460843 | *EHMT1* |
| ENST00000554087 | ENST00000216442 | *ATP6V1D* |
| ENST00000554087 | ENST00000553687 | *ATP6V1D* |
| ENST00000554087 | ENST00000555723 | *ATP6V1D* |
| ENST00000554087 | ENST00000553408 | *ATP6V1D* |
| ENST00000554087 | ENST00000554236 | *ATP6V1D* |
| ENST00000554087 | ENST00000555431 | *ATP6V1D* |
| ENST00000554087 | ENST00000555474 | *ATP6V1D* |
| ENST00000554087 | ENST00000555012 | *ATP6V1D* |
| ENST00000432057 | ENST00000340157 | *VRK2* |
| ENST00000432057 | ENST00000417641 | *VRK2* |
| ENST00000432057 | ENST00000412104 | *VRK2* |
| ENST00000432057 | ENST00000440705 | *VRK2* |
| ENST00000432057 | ENST00000435505 | *VRK2* |
| ENST00000432057 | ENST00000428021 | *VRK2* |
| ENST00000519371 | ENST00000324972 | *DYNC1I1* |
| ENST00000519371 | ENST00000359388 | *DYNC1I1* |
| ENST00000519371 | ENST00000437599 | *DYNC1I1* |
| ENST00000519371 | ENST00000537881 | *DYNC1I1* |
| ENST00000519371 | ENST00000447467 | *DYNC1I1* |
| ENST00000519371 | ENST00000457059 | *DYNC1I1* |
| ENST00000533592 | ENST00000529306 | *RNH1* |
| ENST00000533592 | ENST00000397614 | *RNH1* |
| ENST00000533592 | ENST00000532055 | *RNH1* |
| ENST00000533592 | ENST00000397615 | *RNH1* |
| ENST00000533592 | ENST00000533410 | *RNH1* |
| ENST00000533592 | ENST00000534797 | *RNH1* |
| ENST00000533592 | ENST00000397604 | *RNH1* |
| ENST00000533592 | ENST00000527485 | *RNH1* |
| ENST00000533592 | ENST00000531540 | *RNH1* |
| ENST00000533592 | ENST00000438658 | *RNH1* |
| ENST00000533592 | ENST00000356187 | *RNH1* |
| ENST00000533592 | ENST00000529368 | *RNH1* |
| ENST00000533592 | ENST00000531149 | *RNH1* |
| ENST00000533592 | ENST00000354420 | *RNH1* |
| ENST00000477903 | ENST00000461277 | *ZNF496* |
| ENST00000477903 | ENST00000366498 | *ZNF496* |
| ENST00000477903 | ENST00000294753 | *ZNF496* |
| ENST00000576087 | ENST00000329138 | *HGS* |
| ENST00000576087 | ENST00000572392 | *HGS* |
| ENST00000576087 | ENST00000571518 | *HGS* |
| ENST00000576087 | ENST00000577012 | *HGS* |
| ENST00000435769 | ENST00000438904 | *TYW1B* |
| ENST00000435769 | ENST00000343721 | *TYW1B* |
| ENST00000533730 | ENST00000393150 | *CASP4* |
| ENST00000533730 | ENST00000417440 | *CASP4* |
| ENST00000533730 | ENST00000533252 | *CASP4* |
| ENST00000533730 | ENST00000444739 | *CASP4* |
| ENST00000573547 | ENST00000575605 | *DERL2* |
| ENST00000573547 | ENST00000571971 | *DERL2* |
| ENST00000573547 | ENST00000570848 | *DERL2* |
| ENST00000573547 | ENST00000572834 | *DERL2* |
| ENST00000573547 | ENST00000158771 | *DERL2* |
| ENST00000534292 | ENST00000397248 | *IL15RA* |
| ENST00000534292 | ENST00000453922 | *IL15RA* |
| ENST00000534292 | ENST00000397255 | *IL15RA* |
| ENST00000534292 | ENST00000435171 | *IL15RA* |
| ENST00000534292 | ENST00000379971 | *IL15RA* |
| ENST00000534292 | ENST00000528354 | *IL15RA* |
| ENST00000534292 | ENST00000397251 | *IL15RA* |
| ENST00000534292 | ENST00000530685 | *IL15RA* |
| ENST00000534292 | ENST00000379977 | *IL15RA* |
| ENST00000534292 | ENST00000397250 | *IL15RA* |
| ENST00000534292 | ENST00000447291 | *IL15RA* |
| ENST00000534292 | ENST00000397246 | *IL15RA* |
| ENST00000534292 | ENST00000429135 | *IL15RA* |
| ENST00000534292 | ENST00000525219 | *IL15RA* |
| ENST00000534292 | ENST00000532039 | *IL15RA* |
| ENST00000540592 | ENST00000591599 | *NARS* |
| ENST00000540592 | ENST00000587194 | *NARS* |
| ENST00000540592 | ENST00000256854 | *NARS* |
| ENST00000540592 | ENST00000423481 | *NARS* |
| ENST00000540592 | ENST00000587675 | *NARS* |
| ENST00000540592 | ENST00000588661 | *NARS* |
| ENST00000452107 | ENST00000254770 | *LANCL2* |
| NONHSAG000313 | ENST00000377403 | *H6PD* |
| ENST00000490239 | ENST00000378431 | *CD72* |
| ENST00000490239 | ENST00000396757 | *CD72* |
| ENST00000490239 | ENST00000378430 | *CD72* |
| ENST00000490239 | ENST00000259633 | *CD72* |
| NONHSAT137896 | ENST00000276141 | *SYTL4* |
| NONHSAT137896 | ENST00000454200 | *SYTL4* |
| NONHSAT137896 | ENST00000455616 | *SYTL4* |
| NONHSAT137896 | ENST00000372989 | *SYTL4* |
| ENST00000549097 | ENST00000394147 | *DGKA* |
| ENST00000549097 | ENST00000551707 | *DGKA* |
| ENST00000549097 | ENST00000549629 | *DGKA* |
| ENST00000549097 | ENST00000551156 | *DGKA* |
| ENST00000549097 | ENST00000555090 | *DGKA* |
| ENST00000549097 | ENST00000557080 | *DGKA* |
| ENST00000549097 | ENST00000555218 | *DGKA* |
| ENST00000549097 | ENST00000547015 | *DGKA* |
| ENST00000549097 | ENST00000331886 | *DGKA* |
| ENST00000549097 | ENST00000556001 | *DGKA* |
| ENST00000549097 | ENST00000546878 | *DGKA* |
| ENST00000549097 | ENST00000553783 | *DGKA* |
| ENST00000549097 | ENST00000432422 | *DGKA* |
| ENST00000549097 | ENST00000549368 | *DGKA* |
| ENST00000549097 | ENST00000555025 | *DGKA* |
| ENST00000602338 | ENST00000443148 | *TTLL3* |
| ENST00000602338 | ENST00000455274 | *TTLL3* |
| ENST00000602338 | ENST00000397256 | *ARPC4-TTLL3* |
| ENST00000602338 | ENST00000426895 | *TTLL3* |
| ENST00000602338 | ENST00000430793 | *TTLL3* |
| ENST00000602338 | ENST00000427853 | *TTLL3* |
| ENST00000602338 | ENST00000397241 | *TTLL3* |
| ENST00000602338 | ENST00000310252 | *TTLL3* |
| ENST00000602338 | ENST00000547186 | *TTLL3* |
| ENST00000602338 | ENST00000383827 | *TTLL3* |
| ENST00000602338 | ENST00000452823 | *TTLL3* |
| ENST00000514886 | ENST00000541232 | *PRMT10* |
| ENST00000514886 | ENST00000322396 | *PRMT10* |
| ENST00000593946 | ENST00000599543 | *PNKP* |
| ENST00000593946 | ENST00000596726 | *PNKP* |
| ENST00000593946 | ENST00000600573 | *PNKP* |
| ENST00000593946 | ENST00000597965 | *PNKP* |
| ENST00000593946 | ENST00000600910 | *PNKP* |
| ENST00000593946 | ENST00000322344 | *PNKP* |
| ENST00000593946 | ENST00000596014 | *PNKP* |
| ENST00000507470 | ENST00000438313 | *LEF1* |
| ENST00000507470 | ENST00000379951 | *LEF1* |
| ENST00000507470 | ENST00000265165 | *LEF1* |
| ENST00000507470 | ENST00000510624 | *LEF1* |
| ENST00000469774 | ENST00000320717 | *GLS* |
| ENST00000469774 | ENST00000338435 | *GLS* |
| ENST00000510859 | ENST00000429538 | *PAX8* |
| ENST00000510859 | ENST00000263334 | *PAX8* |
| ENST00000510859 | ENST00000397647 | *PAX8* |
| ENST00000510859 | ENST00000348715 | *PAX8* |
| ENST00000510859 | ENST00000263335 | *PAX8* |
| ENST00000495835 | ENST00000383329 | *HLA-C* |
| ENST00000495835 | ENST00000415537 | *HLA-C* |
| ENST00000495835 | ENST00000376228 | *HLA-C* |
| ENST00000581204 | ENST00000577396 | *SUPT4H1* |
| ENST00000581204 | ENST00000581540 | *SUPT4H1* |
| ENST00000581204 | ENST00000225504 | *SUPT4H1* |
| ENST00000581204 | ENST00000580947 | *SUPT4H1* |
| ENST00000595171 | ENST00000600714 | *ZNF83* |
| ENST00000595171 | ENST00000597161 | *ZNF83* |
| ENST00000595171 | ENST00000597597 | *ZNF83* |
| ENST00000595171 | ENST00000596930 | *ZNF83* |
| ENST00000595171 | ENST00000544146 | *ZNF83* |
| ENST00000595171 | ENST00000601257 | *ZNF83* |
| ENST00000595171 | ENST00000598536 | *ZNF83* |
| ENST00000595171 | ENST00000545872 | *ZNF83* |
| ENST00000595171 | ENST00000301096 | *ZNF83* |
| ENST00000595171 | ENST00000536937 | *ZNF83* |
| ENST00000595171 | ENST00000594682 | *ZNF83* |
| ENST00000595171 | ENST00000541777 | *ZNF83* |
| NONHSAG043575 | ENST00000395330 | *PSMB9* |
| NONHSAG043575 | ENST00000414474 | *PSMB9* |
| ENST00000546446 | ENST00000442245 | *EMX2* |
| ENST00000546446 | ENST00000553456 | *EMX2* |
| ENST00000445429 | ENST00000264741 | *ITGA9* |
| NR_046223 | ENST00000286494 | *ARHGEF25* |
| NR_046223 | ENST00000333972 | *ARHGEF25* |
| ENST00000464950 | ENST00000539954 | *YIPF1* |
| ENST00000464950 | ENST00000371399 | *YIPF1* |
| ENST00000464950 | ENST00000412288 | *YIPF1* |
| ENST00000464950 | ENST00000072644 | *YIPF1* |
| NONHSAG032583 | ENST00000284984 | *ADAMTS1* |
| NONHSAT083938 | ENST00000290691 | *RGL4* |
| NONHSAT083938 | ENST00000423392 | *RGL4* |
| NONHSAT083938 | ENST00000401461 | *RGL4* |
| NR_073068 | ENST00000543133 | *BCL2L13* |
| NR_073068 | ENST00000337612 | *BCL2L13* |
| NR_073068 | ENST00000493680 | *BCL2L13* |
| NR_073068 | ENST00000418951 | *BCL2L13* |
| NR_073068 | ENST00000538149 | *BCL2L13* |
| NR_073068 | ENST00000399782 | *BCL2L13* |
| NR_073068 | ENST00000317582 | *BCL2L13* |
| NR_073068 | ENST00000355028 | *BCL2L13* |
| ENST00000469797 | ENST00000556202 | *AREL1* |
| ENST00000469797 | ENST00000490805 | *AREL1* |
| ENST00000469797 | ENST00000555249 | *AREL1* |
| ENST00000469797 | ENST00000338772 | *AC007956.1* |
| ENST00000469797 | ENST00000356357 | *AREL1* |
| ENST00000433098 | ENST00000393252 | *BCL2L11* |
| ENST00000433098 | ENST00000393253 | *BCL2L11* |
| ENST00000433098 | ENST00000432179 | *BCL2L11* |
| ENST00000433098 | ENST00000357757 | *BCL2L11* |
| ENST00000433098 | ENST00000393256 | *BCL2L11* |
| ENST00000433098 | ENST00000337565 | *BCL2L11* |
| ENST00000433098 | ENST00000308659 | *BCL2L11* |
| ENST00000433098 | ENST00000405953 | *BCL2L11* |
| ENST00000433098 | ENST00000438054 | *BCL2L11* |
| NONHSAG049905 | ENST00000397323 | *RBPMS* |
| NONHSAG049905 | ENST00000320203 | *RBPMS* |
| NONHSAG049905 | ENST00000287771 | *RBPMS* |
| NONHSAG049905 | ENST00000538486 | *RBPMS* |
| ENST00000575674 | ENST00000261381 | *XYLT1* |
| ENST00000575851 | ENST00000576419 | *GLOD4* |
| ENST00000575851 | ENST00000573137 | *GLOD4* |
| ENST00000575851 | ENST00000301328 | *GLOD4* |
| ENST00000575851 | ENST00000536578 | *GLOD4* |
| ENST00000575851 | ENST00000301329 | *GLOD4* |
| ENST00000508016 | ENST00000560249 | *MEPE* |
| ENST00000508016 | ENST00000395102 | *MEPE* |
| ENST00000508016 | ENST00000424957 | *MEPE* |
| ENST00000508016 | ENST00000361056 | *MEPE* |
| ENST00000508016 | ENST00000540395 | *MEPE* |
| ENST00000508016 | ENST00000511670 | *MEPE* |
| ENST00000508016 | ENST00000497649 | *MEPE* |
| ENST00000344312 | ENST00000567873 | *STARD13* |
| ENST00000481934 | ENST00000414429 | *ZSCAN31* |
| ENST00000481934 | ENST00000439158 | *ZSCAN31* |
| ENST00000481934 | ENST00000344279 | *ZSCAN31* |
| ENST00000481934 | ENST00000446474 | *ZSCAN31* |
| ENST00000481934 | ENST00000435857 | *ZSCAN31* |
| ENST00000481934 | ENST00000414431 | *ZSCAN31* |
| ENST00000481934 | ENST00000396838 | *ZSCAN31* |
| ENST00000562619 | ENST00000290607 | *STARD9* |
| ENST00000482720 | ENST00000216037 | *XBP1* |
| ENST00000482720 | ENST00000403532 | *XBP1* |
| ENST00000482720 | ENST00000405219 | *XBP1* |
| ENST00000482720 | ENST00000344347 | *XBP1* |
| ENST00000526700 | ENST00000565715 | *COG4* |
| ENST00000526700 | ENST00000323786 | *COG4* |
| ENST00000544125 | ENST00000551897 | *CPM* |
| ENST00000470171 | ENST00000368356 | *FDPS* |
| ENST00000470171 | ENST00000447866 | *FDPS* |
| ENST00000470171 | ENST00000356657 | *FDPS* |
| ENST00000467594 | ENST00000345716 | *NISCH* |
| ENST00000467594 | ENST00000479054 | *NISCH* |
| ENST00000345721 | ENST00000348126 | *PAM* |
| ENST00000345721 | ENST00000438793 | *PAM* |
| ENST00000345721 | ENST00000274392 | *PAM* |
| ENST00000345721 | ENST00000379799 | *PAM* |
| ENST00000345721 | ENST00000511839 | *PAM* |
| ENST00000345721 | ENST00000505654 | *PAM* |
| ENST00000345721 | ENST00000346918 | *PAM* |
| ENST00000345721 | ENST00000511477 | *PAM* |
| ENST00000345721 | ENST00000379787 | *PAM* |
| ENST00000345721 | ENST00000304400 | *PAM* |
| ENST00000345721 | ENST00000512073 | *PAM* |
| ENST00000345721 | ENST00000455264 | *PAM* |
| ENST00000345721 | ENST00000509832 | *PAM* |
| ENST00000345721 | ENST00000504691 | *PAM* |
| ENST00000345721 | ENST00000506006 | *PAM* |
| TCONS_00162256 | ENST00000345148 | *ABCC1* |
| TCONS_00162256 | ENST00000349029 | *ABCC1* |
| TCONS_00162256 | ENST00000572882 | *ABCC1* |
| TCONS_00162256 | ENST00000351154 | *ABCC1* |
| TCONS_00162256 | ENST00000399410 | *ABCC1* |
| TCONS_00162256 | ENST00000346370 | *ABCC1* |
| TCONS_00162256 | ENST00000399408 | *ABCC1* |
| ENST00000475176 | ENST00000275820 | *NOM1* |
| ENST00000515081 | ENST00000257287 | *CEP135* |
| ENST00000515081 | ENST00000422247 | *CEP135* |
| ENST00000480080 | ENST00000479553 | *GLT8D1* |
| ENST00000480080 | ENST00000394783 | *GLT8D1* |
| ENST00000480080 | ENST00000266014 | *GLT8D1* |
| ENST00000480080 | ENST00000407584 | *GLT8D1* |
| ENST00000480080 | ENST00000491606 | *GLT8D1* |
| ENST00000480080 | ENST00000478968 | *GLT8D1* |
| ENST00000601065 | ENST00000601411 | *SNRNP70* |
| ENST00000601065 | ENST00000598984 | *SNRNP70* |
| ENST00000601065 | ENST00000598441 | *SNRNP70* |
| ENST00000601065 | ENST00000221448 | *SNRNP70* |
| ENST00000495673 | ENST00000402708 | *YPEL5* |
| ENST00000495673 | ENST00000379519 | *YPEL5* |
| ENST00000495673 | ENST00000402003 | *YPEL5* |
| ENST00000495673 | ENST00000261353 | *YPEL5* |
| ENST00000495673 | ENST00000379520 | *YPEL5* |
| ENST00000524643 | ENST00000531185 | *HSD17B12* |
| ENST00000524643 | ENST00000278353 | *HSD17B12* |
| ENST00000547135 | ENST00000308025 | *DDX23* |
| ENST00000547135 | ENST00000551468 | *DDX23* |
| ENST00000547135 | ENST00000550834 | *DDX23* |
| ENST00000547135 | ENST00000552512 | *DDX23* |
| ENST00000482745 | ENST00000422863 | *HLA-DQA1* |
| ENST00000482745 | ENST00000496318 | *HLA-DQA1* |
| ENST00000482745 | ENST00000395363 | *HLA-DQA1* |
| ENST00000482745 | ENST00000374949 | *HLA-DQA1* |
| ENST00000482745 | ENST00000343139 | *HLA-DQA1* |
| ENST00000593114 | ENST00000590881 | *RAD23A* |
| ENST00000593114 | ENST00000541222 | *RAD23A* |
| ENST00000593114 | ENST00000316856 | *RAD23A* |
| ENST00000593114 | ENST00000592268 | *RAD23A* |
| ENST00000593114 | ENST00000586534 | *RAD23A* |
| NR_023361 | ENST00000398333 | *C15ORF38-AP3S2* |
| NR_023361 | ENST00000558648 | *C15ORF38-AP3S2* |
| NR_023361 | ENST00000560940 | *AP3S2* |
| NR_023361 | ENST00000558011 | *AP3S2* |
| NR_023361 | ENST00000559629 | *C15ORF38-AP3S2* |
| NR_023361 | ENST00000336418 | *AP3S2* |
| ENST00000537163 | ENST00000298717 | *METTL3* |
| ENST00000537163 | ENST00000538267 | *METTL3* |
| ENST00000537163 | ENST00000377543 | *METTL3* |
| ENST00000490927 | ENST00000458563 | *SCRN3* |
| ENST00000490927 | ENST00000427038 | *SCRN3* |
| ENST00000490927 | ENST00000435964 | *SCRN3* |
| ENST00000490927 | ENST00000272732 | *SCRN3* |
| ENST00000490927 | ENST00000424069 | *SCRN3* |
| ENST00000490927 | ENST00000548031 | *SCRN3* |
| ENST00000490927 | ENST00000409673 | *SCRN3* |
| NR_036462 | ENST00000309048 | *APITD1* |
| NR_036462 | ENST00000602296 | *APITD1* |
| NR_036462 | ENST00000400900 | *APITD1-CORT* |
| NR_036462 | ENST00000470413 | *APITD1-CORT* |
| NR_036462 | ENST00000602787 | *APITD1* |
| NR_036462 | ENST00000602446 | *APITD1-CORT* |
| NR_036462 | ENST00000477755 | *APITD1* |
| ENST00000577088 | ENST00000582151 | *MPDU1* |
| ENST00000577088 | ENST00000423172 | *MPDU1* |
| ENST00000577088 | ENST00000396501 | *MPDU1* |
| ENST00000577088 | ENST00000585217 | *MPDU1* |
| ENST00000577088 | ENST00000579445 | *MPDU1* |
| ENST00000577088 | ENST00000581380 | *MPDU1* |
| ENST00000577088 | ENST00000584378 | *MPDU1* |
| ENST00000577088 | ENST00000250124 | *MPDU1* |
| ENST00000592207 | ENST00000300843 | *MARK4* |
| ENST00000592207 | ENST00000262891 | *MARK4* |
| ENST00000490791 | ENST00000407969 | *SETD5* |
| ENST00000490791 | ENST00000406341 | *SETD5* |
| ENST00000490791 | ENST00000442373 | *SETD5* |
| ENST00000490791 | ENST00000302463 | *SETD5* |
| ENST00000490791 | ENST00000402198 | *SETD5* |
| ENST00000490791 | ENST00000450326 | *SETD5* |
| ENST00000490791 | ENST00000402466 | *SETD5* |
| ENST00000282169 | ENST00000538489 | *UHMK1* |
| ENST00000282169 | ENST00000489294 | *UHMK1* |
| ENST00000282169 | ENST00000545294 | *UHMK1* |
| ENST00000522146 | ENST00000359865 | *SOGA2* |
| ENST00000522146 | ENST00000523122 | *SOGA2* |
| ENST00000522146 | ENST00000306285 | *SOGA2* |
| ENST00000522146 | ENST00000400050 | *SOGA2* |
| ENST00000522146 | ENST00000517570 | *SOGA2* |
| ENST00000522146 | ENST00000306329 | *SOGA2* |
| ENST00000305481 | ENST00000339865 | *USP47* |
| ENST00000305481 | ENST00000527733 | *USP47* |
| ENST00000305481 | ENST00000539466 | *USP47* |
| ENST00000305481 | ENST00000399455 | *USP47* |
| ENST00000494853 | ENST00000409790 | *CLEC16A* |
| ENST00000494853 | ENST00000409552 | *CLEC16A* |
| lnc-TUBGCP2-1:1 | ENST00000415217 | *ADAM8* |
| lnc-TUBGCP2-1:1 | ENST00000485491 | *ADAM8* |
| lnc-TUBGCP2-1:1 | ENST00000486609 | *ADAM8* |
| lnc-TUBGCP2-1:1 | ENST00000445355 | *ADAM8* |
| ENST00000532131 | ENST00000373148 | *MAP7D1* |
| ENST00000532131 | ENST00000373151 | *MAP7D1* |
| ENST00000532131 | ENST00000530975 | *MAP7D1* |
| ENST00000532131 | ENST00000373150 | *MAP7D1* |
| ENST00000532131 | ENST00000316156 | *MAP7D1* |
| ENST00000465953 | ENST00000368321 | *KIAA0907* |
| ENST00000465953 | ENST00000368320 | *KIAA0907* |
| ENST00000510702 | ENST00000510968 | *RWDD4* |
| ENST00000510702 | ENST00000326397 | *RWDD4* |
| ENST00000510702 | ENST00000512740 | *RWDD4* |
| ENST00000510702 | ENST00000506467 | *RWDD4* |
| ENST00000510702 | ENST00000327570 | *RWDD4* |
| NONHSAG019721 | ENST00000565560 | *NOL3* |
| ENST00000564750 | ENST00000299853 | *POLR3E* |
| ENST00000564750 | ENST00000418581 | *POLR3E* |
| ENST00000564750 | ENST00000564209 | *POLR3E* |
| ENST00000564750 | ENST00000565358 | *POLR3E* |
| ENST00000564750 | ENST00000564883 | *POLR3E* |
| ENST00000564750 | ENST00000563024 | *POLR3E* |
| ENST00000564750 | ENST00000359210 | *POLR3E* |
| ENST00000564750 | ENST00000569757 | *POLR3E* |
| NONHSAT001302 | ENST00000375144 | *CAPZB* |
| NONHSAT001302 | ENST00000433834 | *CAPZB* |
| NONHSAT001302 | ENST00000401084 | *CAPZB* |
| NONHSAT001302 | ENST00000413711 | *CAPZB* |
| NONHSAT001302 | ENST00000264203 | *CAPZB* |
| NONHSAT001302 | ENST00000264202 | *CAPZB* |
| NONHSAT001302 | ENST00000375142 | *CAPZB* |
| NONHSAT042411 | ENST00000359031 | *GABPB1* |
| NONHSAT042411 | ENST00000396464 | *GABPB1* |
| NONHSAT042411 | ENST00000380877 | *GABPB1* |
| NONHSAT042411 | ENST00000220429 | *GABPB1* |
| NONHSAT042411 | ENST00000543881 | *GABPB1* |
| NONHSAT042411 | ENST00000560825 | *GABPB1* |
| NONHSAT042411 | ENST00000429662 | *GABPB1* |
| NONHSAT042411 | ENST00000558970 | *GABPB1* |
| ENST00000471167 | ENST00000410080 | *PRPF40A* |
| NONHSAT075917 | ENST00000264065 | *DNAJC10* |
| ENST00000484745 | ENST00000440132 | *RNF220* |
| ENST00000484745 | ENST00000335497 | *RNF220* |
| ENST00000484745 | ENST00000443020 | *RNF220* |
| ENST00000484745 | ENST00000361799 | *RNF220* |
| ENST00000484745 | ENST00000372247 | *RNF220* |
| ENST00000484745 | ENST00000355387 | *RNF220* |
| ENST00000484745 | ENST00000453863 | *RNF220* |
| ENST00000544304 | ENST00000432953 | *RAB35* |
| ENST00000544304 | ENST00000538903 | *RAB35* |
| ENST00000544304 | ENST00000534951 | *RAB35* |
| ENST00000544304 | ENST00000229340 | *RAB35* |
| ENST00000571217 | ENST00000346752 | *XAF1* |
| ENST00000571217 | ENST00000361842 | *XAF1* |
| ENST00000571217 | ENST00000438512 | *XAF1* |
| ENST00000571217 | ENST00000574394 | *XAF1* |
| ENST00000571217 | ENST00000574907 | *XAF1* |
| ENST00000571217 | ENST00000441631 | *XAF1* |
| ENST00000481267 | ENST00000382518 | *CD9* |
| ENST00000481267 | ENST00000009180 | *CD9* |
| ENST00000481267 | ENST00000536586 | *CD9* |
| ENST00000481267 | ENST00000382519 | *CD9* |
| ENST00000481267 | ENST00000382515 | *CD9* |
| ENST00000479095 | ENST00000381858 | *CDC37L1* |
| ENST00000479095 | ENST00000381854 | *CDC37L1* |
| ENST00000490296 | ENST00000369847 | *PCGF6* |
| ENST00000490296 | ENST00000337211 | *PCGF6* |
| ENST00000486575 | ENST00000331821 | *RANBP1* |
| ENST00000486575 | ENST00000418705 | *RANBP1* |
| ENST00000486575 | ENST00000430524 | *RANBP1* |
| ENST00000486575 | ENST00000402752 | *RANBP1* |
| ENST00000486575 | ENST00000423859 | *RANBP1* |
| ENST00000486575 | ENST00000448394 | *RANBP1* |
| ENST00000486575 | ENST00000411892 | *RANBP1* |
| NONHSAT037636 | ENST00000557151 | *SIPA1L1* |
| NONHSAG039875 | ENST00000274140 | *6-Mar* |
| NONHSAG039875 | ENST00000503788 | *6-Mar* |
| NONHSAG039875 | ENST00000449913 | *6-Mar* |
| ENST00000589318 | ENST00000591275 | *DDX39A* |
| ENST00000589318 | ENST00000589675 | *DDX39A* |
| ENST00000589318 | ENST00000592632 | *DDX39A* |
| ENST00000589318 | ENST00000590315 | *DDX39A* |
| ENST00000589318 | ENST00000590239 | *DDX39A* |
| ENST00000589318 | ENST00000242776 | *DDX39A* |
| ENST00000589318 | ENST00000590696 | *DDX39A* |
| ENST00000589318 | ENST00000586993 | *DDX39A* |
| ENST00000589318 | ENST00000454233 | *DDX39A* |
| ENST00000489087 | ENST00000413688 | *KRIT1* |
| ENST00000489087 | ENST00000458493 | *KRIT1* |
| ENST00000489087 | ENST00000394505 | *KRIT1* |
| ENST00000489087 | ENST00000430102 | *KRIT1* |
| ENST00000489087 | ENST00000425919 | *KRIT1* |
| ENST00000489087 | ENST00000422347 | *KRIT1* |
| ENST00000489087 | ENST00000458177 | *KRIT1* |
| ENST00000489087 | ENST00000340022 | *KRIT1* |
| ENST00000489087 | ENST00000394503 | *KRIT1* |
| ENST00000489087 | ENST00000425073 | *KRIT1* |
| ENST00000489087 | ENST00000452773 | *KRIT1* |
| ENST00000489087 | ENST00000444960 | *KRIT1* |
| ENST00000489087 | ENST00000433016 | *KRIT1* |
| ENST00000489087 | ENST00000394507 | *KRIT1* |
| ENST00000489087 | ENST00000412043 | *KRIT1* |
| ENST00000489087 | ENST00000454017 | *KRIT1* |
| ENST00000489087 | ENST00000440209 | *KRIT1* |
| ENST00000471599 | ENST00000537234 | *KPNA6* |
| ENST00000471599 | ENST00000373625 | *KPNA6* |
| ENST00000471599 | ENST00000545542 | *KPNA6* |
| ENST00000471599 | ENST00000446515 | *KPNA6* |
| ENST00000483553 | ENST00000491994 | *SKIV2L* |
| ENST00000483553 | ENST00000544581 | *SKIV2L* |
| ENST00000483553 | ENST00000375394 | *SKIV2L* |
| ENST00000575511 | ENST00000347992 | *MINK1* |
| ENST00000575511 | ENST00000453408 | *MINK1* |
| ENST00000575511 | ENST00000355280 | *MINK1* |
| ENST00000510099 | ENST00000437932 | *PDLIM5* |
| ENST00000510099 | ENST00000542407 | *PDLIM5* |
| ENST00000510099 | ENST00000318007 | *PDLIM5* |
| ENST00000510099 | ENST00000508216 | *PDLIM5* |
| ENST00000510099 | ENST00000450793 | *PDLIM5* |
| ENST00000510099 | ENST00000514743 | *PDLIM5* |
| ENST00000510099 | ENST00000317968 | *PDLIM5* |
| ENST00000510099 | ENST00000380180 | *PDLIM5* |
| ENST00000510099 | ENST00000538141 | *PDLIM5* |
| ENST00000510099 | ENST00000503974 | *PDLIM5* |
| ENST00000510099 | ENST00000513341 | *PDLIM5* |
| NONHSAG015143 | ENST00000406949 | *PCNXL4* |
| NONHSAG015143 | ENST00000317623 | *PCNXL4* |
| NONHSAG015143 | ENST00000406854 | *PCNXL4* |
| NONHSAG015143 | ENST00000391611 | *PCNXL4* |
| NONHSAT078262 | ENST00000336095 | *RNF24* |
| NONHSAG012555 | ENST00000537265 | *RHOF* |
| NONHSAG012555 | ENST00000535560 | *RHOF* |
| NONHSAG012555 | ENST00000267205 | *RHOF* |
| NONHSAG012555 | ENST00000537171 | *RHOF* |
| NONHSAG012555 | ENST00000541657 | *RHOF* |
| NONHSAG012555 | ENST00000546227 | *RHOF* |
| ENST00000537533 | ENST00000447931 | *PTPN6* |
| ENST00000537533 | ENST00000456013 | *PTPN6* |
| ENST00000537533 | ENST00000399448 | *PTPN6* |
| ENST00000537533 | ENST00000318974 | *PTPN6* |
| ENST00000588731 | ENST00000334782 | *SUGP1* |
| ENST00000588731 | ENST00000590439 | *SUGP1* |
| ENST00000588731 | ENST00000247001 | *SUGP1* |
| ENST00000488500 | ENST00000331523 | *EEF1A1* |
| ENST00000488500 | ENST00000455918 | *EEF1A1* |
| ENST00000488500 | ENST00000309268 | *EEF1A1* |
| ENST00000488500 | ENST00000356303 | *EEF1A1* |
| ENST00000488500 | ENST00000316292 | *EEF1A1* |
| NR_102318 | ENST00000263238 | *ACTR3* |
| NR_102318 | ENST00000535589 | *ACTR3* |
| NR_102318 | ENST00000536059 | *ACTR3* |
| NONHSAT008254 | ENST00000263726 | *LHX4* |
| ENST00000586014 | ENST00000245932 | *VASP* |
| ENST00000586014 | ENST00000592139 | *VASP* |
| ENST00000586014 | ENST00000590603 | *VASP* |
| ENST00000586014 | ENST00000589627 | *VASP* |
| NONHSAT143954 | ENST00000539778 | *CMIP* |
| NONHSAT143954 | ENST00000537098 | *CMIP* |
| NONHSAT143954 | ENST00000398040 | *CMIP* |
| ENST00000449779 | ENST00000441833 | *GSAP* |
| ENST00000449779 | ENST00000257626 | *GSAP* |
| ENST00000449779 | ENST00000415112 | *GSAP* |
| ENST00000609606 | ENST00000217244 | *CSNK2A1* |
| ENST00000609606 | ENST00000608066 | *CSNK2A1* |
| ENST00000609606 | ENST00000400217 | *CSNK2A1* |
| ENST00000609606 | ENST00000609525 | *CSNK2A1* |
| ENST00000609606 | ENST00000400227 | *CSNK2A1* |
| ENST00000609606 | ENST00000460062 | *CSNK2A1* |
| ENST00000609606 | ENST00000349736 | *CSNK2A1* |
| ENST00000403371 | ENST00000356413 | *IGBP1* |
| ENST00000403371 | ENST00000342206 | *IGBP1* |
| ENST00000493727 | ENST00000351487 | *UPF3A* |
| ENST00000493727 | ENST00000375299 | *UPF3A* |
| ENST00000434755 | ENST00000222823 | *NOD1* |
| ENST00000434755 | ENST00000423334 | *NOD1* |
| ENST00000434755 | ENST00000411552 | *NOD1* |
| ENST00000434755 | ENST00000413433 | *NOD1* |
| ENST00000434755 | ENST00000419601 | *NOD1* |
| ENST00000434755 | ENST00000419799 | *NOD1* |
| ENST00000540709 | ENST00000551897 | *CPM* |
| ENST00000350356 | ENST00000308677 | *PRKACA* |
| ENST00000350356 | ENST00000587372 | *PRKACA* |
| ENST00000350356 | ENST00000593092 | *PRKACA* |
| ENST00000350356 | ENST00000589994 | *PRKACA* |
| ENST00000350356 | ENST00000590853 | *PRKACA* |
| ENST00000350356 | ENST00000589284 | *PRKACA* |
| ENST00000557417 | ENST00000557235 | *STAT2* |
| ENST00000557417 | ENST00000418572 | *STAT2* |
| ENST00000557417 | ENST00000314128 | *STAT2* |
| ENST00000506973 | ENST00000315368 | *ANAPC4* |
| ENST00000506973 | ENST00000510092 | *ANAPC4* |
| ENST00000463550 | ENST00000445193 | *RPP14* |
| ENST00000463550 | ENST00000466547 | *RPP14* |
| ENST00000463550 | ENST00000295959 | *RPP14* |
| ENST00000569326 | ENST00000292539 | *PPP1R16A* |
| ENST00000569326 | ENST00000435887 | *PPP1R16A* |
| ENST00000485081 | ENST00000367549 | *DHX9* |
| ENST00000268758 | ENST00000395346 | *PIGS* |
| ENST00000268758 | ENST00000543734 | *PIGS* |
| ENST00000268758 | ENST00000308360 | *PIGS* |
| ENST00000562272 | ENST00000300093 | *PLK1* |
| ENST00000562272 | ENST00000568568 | *PLK1* |
| ENST00000562272 | ENST00000567897 | *PLK1* |
| ENST00000257254 | ENST00000606794 | *APLNR* |
| ENST00000490065 | ENST00000476722 | *SDCCAG8* |
| ENST00000490065 | ENST00000391846 | *SDCCAG8* |
| ENST00000490065 | ENST00000343783 | *SDCCAG8* |
| ENST00000490065 | ENST00000366541 | *SDCCAG8* |
| ENST00000490065 | ENST00000435549 | *SDCCAG8* |
| ENST00000490065 | ENST00000355875 | *SDCCAG8* |
| NONHSAG026734 | ENST00000594369 | *ZNF446* |
| NONHSAG026734 | ENST00000596341 | *ZNF446* |
| NONHSAG026734 | ENST00000335841 | *ZNF446* |
| NR_103856 | ENST00000544840 | *PNPO* |
| NR_103856 | ENST00000534893 | *PNPO* |
| NR_103856 | ENST00000434554 | *PNPO* |
| NR_103856 | ENST00000225573 | *PNPO* |
| NR_103856 | ENST00000583599 | *PNPO* |
| NONHSAT130901 | ENST00000421828 | *RP11-195F19.5* |
| NONHSAT130901 | ENST00000423809 | *RP11-195F19.5* |
| ENST00000463486 | ENST00000482399 | *VPS52* |
| ENST00000463486 | ENST00000445902 | *VPS52* |
| ENST00000463486 | ENST00000436044 | *VPS52* |
| ENST00000506310 | ENST00000502560 | *LMAN2* |
| ENST00000506310 | ENST00000515209 | *LMAN2* |
| ENST00000506310 | ENST00000303127 | *LMAN2* |
| ENST00000506310 | ENST00000513877 | *LMAN2* |
| ENST00000506310 | ENST00000514458 | *LMAN2* |
| NONHSAG044923 | ENST00000308191 | *PDE7B* |
| ENST00000426481 | ENST00000378520 | *PREPL* |
| ENST00000426481 | ENST00000541738 | *PREPL* |
| ENST00000426481 | ENST00000409272 | *PREPL* |
| ENST00000426481 | ENST00000438314 | *PREPL* |
| ENST00000426481 | ENST00000444696 | *PREPL* |
| ENST00000426481 | ENST00000260648 | *PREPL* |
| ENST00000426481 | ENST00000409936 | *PREPL* |
| ENST00000426481 | ENST00000409957 | *PREPL* |
| ENST00000426481 | ENST00000409411 | *PREPL* |
| ENST00000426481 | ENST00000410081 | *PREPL* |
| ENST00000426481 | ENST00000378511 | *PREPL* |
| ENST00000426481 | ENST00000420756 | *PREPL* |
| NONHSAT009703 | ENST00000340934 | *BROX* |
| NONHSAT009703 | ENST00000539697 | *BROX* |
| NONHSAT009703 | ENST00000537020 | *BROX* |
| ENST00000454046 | ENST00000451771 | *ASNS* |
| ENST00000454046 | ENST00000444334 | *ASNS* |
| ENST00000454046 | ENST00000394309 | *ASNS* |
| ENST00000454046 | ENST00000422745 | *ASNS* |
| ENST00000454046 | ENST00000437657 | *ASNS* |
| ENST00000454046 | ENST00000437628 | *ASNS* |
| ENST00000454046 | ENST00000442734 | *ASNS* |
| ENST00000454046 | ENST00000448127 | *ASNS* |
| ENST00000454046 | ENST00000414884 | *ASNS* |
| ENST00000454046 | ENST00000453600 | *ASNS* |
| ENST00000454046 | ENST00000394308 | *ASNS* |
| ENST00000454046 | ENST00000175506 | *ASNS* |
| ENST00000454046 | ENST00000455086 | *ASNS* |
| NONHSAT047509 | ENST00000465531 | *TBC1D2B* |
| ENST00000468459 | ENST00000440437 | *COL16A1* |
| ENST00000468459 | ENST00000458715 | *COL16A1* |
| ENST00000468459 | ENST00000373672 | *COL16A1* |
| ENST00000468459 | ENST00000271069 | *COL16A1* |
| NONHSAT114850 | ENST00000525745 | *ECHDC1* |
| NONHSAT114850 | ENST00000454591 | *ECHDC1* |
| NONHSAT114850 | ENST00000531967 | *ECHDC1* |
| NONHSAT114850 | ENST00000528402 | *ECHDC1* |
| NONHSAT114850 | ENST00000368291 | *ECHDC1* |
| NONHSAT114850 | ENST00000534442 | *ECHDC1* |
| NONHSAT114850 | ENST00000368289 | *ECHDC1* |
| NONHSAT114850 | ENST00000474289 | *ECHDC1* |
| NONHSAT114850 | ENST00000454859 | *ECHDC1* |
| NONHSAT114850 | ENST00000430841 | *ECHDC1* |
| NONHSAT114850 | ENST00000309620 | *ECHDC1* |
| ENST00000464539 | ENST00000395799 | *TNRC6A* |
| ENST00000464539 | ENST00000315183 | *TNRC6A* |
| ENST00000464539 | ENST00000450465 | *TNRC6A* |
| ENST00000464539 | ENST00000432286 | *TNRC6A* |
| ENST00000464539 | ENST00000569098 | *TNRC6A* |
| ENST00000568233 | ENST00000567105 | *NUTF2* |
| ENST00000568233 | ENST00000569436 | *NUTF2* |
| ENST00000568233 | ENST00000568396 | *NUTF2* |
| ENST00000568233 | ENST00000219169 | *NUTF2* |
| ENST00000553051 | ENST00000331782 | *JAG2* |
| ENST00000553051 | ENST00000347004 | *JAG2* |
| ENST00000475723 | ENST00000578103 | *TTC19* |
| ENST00000475723 | ENST00000486880 | *TTC19* |
| ENST00000475723 | ENST00000261647 | *TTC19* |
| ENST00000475723 | ENST00000470649 | *TTC19* |
| ENST00000547640 | ENST00000549701 | *DNM1L* |
| ENST00000547640 | ENST00000381000 | *DNM1L* |
| ENST00000547640 | ENST00000547312 | *DNM1L* |
| ENST00000547640 | ENST00000266481 | *DNM1L* |
| ENST00000547640 | ENST00000452533 | *DNM1L* |
| ENST00000547640 | ENST00000414834 | *DNM1L* |
| ENST00000547640 | ENST00000553257 | *DNM1L* |
| ENST00000547640 | ENST00000358214 | *DNM1L* |
| NR_024546 | ENST00000217515 | *TXNL1* |
| NR_024546 | ENST00000540155 | *TXNL1* |
| NR_024546 | ENST00000589329 | *TXNL1* |
| NR_024546 | ENST00000590954 | *TXNL1* |
| NR_024546 | ENST00000586262 | *TXNL1* |
| NR_024546 | ENST00000587613 | *TXNL1* |
| NR_024546 | ENST00000589931 | *TXNL1* |
| ENST00000474124 | ENST00000449878 | *PTGES2* |
| ENST00000474124 | ENST00000338961 | *PTGES2* |
| ENST00000474124 | ENST00000277462 | *PTGES2* |
| NONHSAG046847 | ENST00000399537 | *TNRC18* |
| NONHSAG046847 | ENST00000430969 | *TNRC18* |
| NONHSAG046847 | ENST00000399434 | *TNRC18* |
| ENST00000600689 | ENST00000599848 | *UPF1* |
| ENST00000600689 | ENST00000262803 | *UPF1* |
| ENST00000492098 | ENST00000431278 | *ZNF621* |
| ENST00000492098 | ENST00000453351 | *ZNF621* |
| ENST00000492098 | ENST00000403205 | *ZNF621* |
| ENST00000492098 | ENST00000339296 | *ZNF621* |
| ENST00000492098 | ENST00000310898 | *ZNF621* |
| ENST00000471377 | ENST00000357325 | *HDGF* |
| ENST00000471377 | ENST00000368209 | *HDGF* |
| ENST00000471377 | ENST00000537739 | *HDGF* |
| ENST00000471377 | ENST00000368206 | *HDGF* |
| ENST00000471377 | ENST00000416666 | *HDGF* |
| ENST00000578473 | ENST00000581530 | *FDXR* |
| ENST00000578473 | ENST00000583917 | *FDXR* |
| ENST00000578473 | ENST00000582944 | *FDXR* |
| ENST00000578473 | ENST00000293195 | *FDXR* |
| ENST00000578473 | ENST00000420580 | *FDXR* |
| ENST00000578473 | ENST00000442102 | *FDXR* |
| ENST00000578473 | ENST00000455107 | *FDXR* |
| ENST00000578473 | ENST00000544854 | *FDXR* |
| ENST00000578473 | ENST00000413947 | *FDXR* |
| ENST00000578473 | ENST00000579893 | *FDXR* |
| ENST00000578473 | ENST00000581219 | *FDXR* |
| NONHSAT007713 | ENST00000367696 | *RC3H1* |
| NONHSAT007713 | ENST00000258349 | *RC3H1* |
| ENST00000478046 | ENST00000391919 | *PPP5C* |
| ENST00000478046 | ENST00000012443 | *PPP5C* |
| NONHSAG037210 | ENST00000383028 | *PIGG* |
| NONHSAG037210 | ENST00000296306 | *PIGG* |
| NONHSAG037210 | ENST00000310340 | *PIGG* |
| NONHSAG037210 | ENST00000453061 | *PIGG* |
| NONHSAG037210 | ENST00000504346 | *PIGG* |
| NONHSAG037210 | ENST00000510235 | *PIGG* |
| ENST00000490666 | ENST00000291565 | *PDXK* |
| ENST00000490666 | ENST00000467908 | *PDXK* |
| ENST00000490666 | ENST00000468090 | *PDXK* |
| ENST00000540608 | ENST00000412552 | *NPC1* |
| ENST00000540608 | ENST00000269228 | *NPC1* |
| ENST00000540608 | ENST00000591051 | *NPC1* |
| ENST00000494854 | ENST00000426002 | *SHISA5* |
| ENST00000494854 | ENST00000296444 | *SHISA5* |
| ENST00000494854 | ENST00000417841 | *SHISA5* |
| ENST00000494854 | ENST00000444115 | *SHISA5* |
| ENST00000494854 | ENST00000442747 | *SHISA5* |
| ENST00000494854 | ENST00000443308 | *SHISA5* |
| NR_104051 | ENST00000334418 | *CCDC84* |
| ENST00000475298 | ENST00000295926 | *CCNL1* |
| ENST00000475298 | ENST00000461804 | *CCNL1* |
| ENST00000475298 | ENST00000295925 | *CCNL1* |
| ENST00000600125 | ENST00000594684 | *AC003006.7* |
| NONHSAT087784 | ENST00000406341 | *SETD5* |
| NONHSAT087784 | ENST00000402466 | *SETD5* |
| NONHSAT087784 | ENST00000402198 | *SETD5* |
| NONHSAT087784 | ENST00000450326 | *SETD5* |
| NR_024555 | ENST00000357917 | *RHOBTB1* |
| NR_024555 | ENST00000337910 | *RHOBTB1* |
| ENST00000568206 | ENST00000261609 | *HERC2* |
| ENST00000470470 | ENST00000373233 | *CHD6* |
| ENST00000470470 | ENST00000440697 | *CHD6* |
| ENST00000470470 | ENST00000440647 | *CHD6* |
| ENST00000470470 | ENST00000309279 | *CHD6* |
| ENST00000470470 | ENST00000373222 | *CHD6* |
| ENST00000424989 | ENST00000373087 | *ZC3H12A* |
| ENST00000420141 | ENST00000254508 | *NUP210* |
| ENST00000475650 | ENST00000409939 | *TBC1D10B* |
| ENST00000475650 | ENST00000490703 | *TBC1D10B* |
| ENST00000583273 | ENST00000426861 | *4-Sep* |
| ENST00000583273 | ENST00000579371 | *4-Sep* |
| ENST00000583273 | ENST00000317256 | *4-Sep* |
| ENST00000583273 | ENST00000393086 | *4-Sep* |
| ENST00000583273 | ENST00000580844 | *4-Sep* |
| ENST00000583273 | ENST00000580809 | *4-Sep* |
| ENST00000583273 | ENST00000581607 | *4-Sep* |
| ENST00000583273 | ENST00000577729 | *4-Sep* |
| ENST00000583273 | ENST00000412945 | *4-Sep* |
| ENST00000583273 | ENST00000317268 | *4-Sep* |
| ENST00000583273 | ENST00000457347 | *4-Sep* |
| ENST00000583273 | ENST00000583114 | *4-Sep* |
| ENST00000583273 | ENST00000583291 | *4-Sep* |
| ENST00000486072 | ENST00000518681 | *MIB2* |
| ENST00000486072 | ENST00000360522 | *MIB2* |
| ENST00000486072 | ENST00000520777 | *MIB2* |
| ENST00000486072 | ENST00000514234 | *MIB2* |
| ENST00000486072 | ENST00000378710 | *MIB2* |
| ENST00000486072 | ENST00000504599 | *MIB2* |
| ENST00000486072 | ENST00000378712 | *MIB2* |
| ENST00000486072 | ENST00000505820 | *MIB2* |
| ENST00000486072 | ENST00000378708 | *MIB2* |
| ENST00000486072 | ENST00000357210 | *MIB2* |
| ENST00000486072 | ENST00000355826 | *MIB2* |
| ENST00000435068 | ENST00000242248 | *POLM* |
| ENST00000435068 | ENST00000335195 | *POLM* |
| ENST00000435068 | ENST00000414235 | *POLM* |
| ENST00000435068 | ENST00000395831 | *POLM* |
| ENST00000435068 | ENST00000452049 | *POLM* |
| ENST00000546636 | ENST00000550714 | *SLC11A2* |
| ENST00000546636 | ENST00000547198 | *SLC11A2* |
| ENST00000546636 | ENST00000262051 | *SLC11A2* |
| ENST00000546636 | ENST00000548150 | *SLC11A2* |
| ENST00000546636 | ENST00000262052 | *SLC11A2* |
| ENST00000546636 | ENST00000541174 | *SLC11A2* |
| ENST00000546636 | ENST00000547688 | *SLC11A2* |
| ENST00000546636 | ENST00000394904 | *SLC11A2* |
| ENST00000546636 | ENST00000548193 | *SLC11A2* |
| ENST00000546636 | ENST00000547732 | *SLC11A2* |
| ENST00000546636 | ENST00000546743 | *SLC11A2* |
| ENST00000546636 | ENST00000546488 | *SLC11A2* |
| ENST00000546636 | ENST00000545993 | *SLC11A2* |
| ENST00000546636 | ENST00000549110 | *SLC11A2* |
| ENST00000546636 | ENST00000547579 | *SLC11A2* |
| ENST00000478105 | ENST00000400274 | *DIP2A* |
| ENST00000478105 | ENST00000417564 | *DIP2A* |
| ENST00000478105 | ENST00000318711 | *DIP2A* |
| ENST00000600237 | ENST00000602061 | *SYMPK* |
| ENST00000600237 | ENST00000598059 | *SYMPK* |
| ENST00000600237 | ENST00000601600 | *SYMPK* |
| ENST00000600237 | ENST00000594293 | *SYMPK* |
| ENST00000600237 | ENST00000245934 | *SYMPK* |
| ENST00000585616 | ENST00000592576 | *EFTUD2* |
| ENST00000585616 | ENST00000426333 | *EFTUD2* |
| ENST00000585616 | ENST00000591382 | *EFTUD2* |
| ENST00000585616 | ENST00000402521 | *EFTUD2* |
| ENST00000489767 | ENST00000444053 | *AAMP* |
| ENST00000489767 | ENST00000248450 | *AAMP* |
| ENST00000489767 | ENST00000422731 | *AAMP* |
| ENST00000489767 | ENST00000420660 | *AAMP* |
| ENST00000489767 | ENST00000447885 | *AAMP* |
| ENST00000470284 | ENST00000482182 | *FAM58A* |
| ENST00000470284 | ENST00000406277 | *FAM58A* |
| ENST00000470284 | ENST00000440428 | *FAM58A* |
| ENST00000470284 | ENST00000429336 | *FAM58A* |
| ENST00000495458 | ENST00000303270 | *RAB24* |
| ENST00000495458 | ENST00000504395 | *RAB24* |
| ENST00000495458 | ENST00000393611 | *RAB24* |
| ENST00000495458 | ENST00000303251 | *RAB24* |
| ENST00000475693 | ENST00000405546 | *ATG4B* |
| ENST00000475693 | ENST00000396411 | *ATG4B* |
| ENST00000475693 | ENST00000428861 | *ATG4B* |
| ENST00000475693 | ENST00000402096 | *ATG4B* |
| ENST00000475693 | ENST00000404914 | *ATG4B* |
| ENST00000475693 | ENST00000474739 | *ATG4B* |
| ENST00000462009 | ENST00000337000 | *SLC26A6* |
| ENST00000462009 | ENST00000383733 | *SLC26A6* |
| ENST00000462009 | ENST00000395550 | *SLC26A6* |
| ENST00000462009 | ENST00000358747 | *SLC26A6* |
| ENST00000462009 | ENST00000455886 | *SLC26A6* |
| ENST00000462009 | ENST00000420764 | *SLC26A6* |
| NONHSAG055173 | ENST00000371642 | *IL13RA1* |
| NONHSAG055173 | ENST00000371666 | *IL13RA1* |
| ENST00000498645 | ENST00000490035 | *LSAMP* |
| ENST00000498645 | ENST00000474851 | *LSAMP* |
| ENST00000498645 | ENST00000333617 | *LSAMP* |
| ENST00000498645 | ENST00000539563 | *LSAMP* |
| ENST00000486438 | ENST00000393892 | *CNP* |
| ENST00000486438 | ENST00000472031 | *CNP* |
| ENST00000486438 | ENST00000591072 | *CNP* |
| ENST00000486438 | ENST00000393888 | *CNP* |
| ENST00000520991 | ENST00000331222 | *CLN8* |
| ENST00000607343 | ENST00000606784 | *TBX18* |
| ENST00000607343 | ENST00000369663 | *TBX18* |
| ENST00000587942 | ENST00000357637 | *PIGN* |
| ENST00000587942 | ENST00000586566 | *PIGN* |
| ENST00000587942 | ENST00000400334 | *PIGN* |
| NR_102317 | ENST00000222214 | *GCDH* |
| NR_102317 | ENST00000457854 | *GCDH* |
| NR_102317 | ENST00000589039 | *GCDH* |
| NR_102317 | ENST00000587072 | *GCDH* |
| NR_102317 | ENST00000591470 | *GCDH* |
| NR_102317 | ENST00000588905 | *GCDH* |
| NR_102317 | ENST00000590472 | *GCDH* |
| NR_102317 | ENST00000422947 | *GCDH* |
| NR_102317 | ENST00000591050 | *GCDH* |
| NR_024606 | ENST00000341396 | *LBX2* |
| NR_024606 | ENST00000233630 | *PCGF1* |
| NR_024606 | ENST00000460508 | *LBX2* |
| ENST00000463317 | ENST00000460621 | *VAMP7* |
| ENST00000463317 | ENST00000286448 | *VAMP7* |
| ENST00000463317 | ENST00000262640 | *VAMP7* |
| ENST00000457387 | ENST00000370267 | *DR1* |
| ENST00000457387 | ENST00000370272 | *DR1* |
| ENST00000529522 | ENST00000531224 | *BCLAF1* |
| ENST00000529522 | ENST00000530767 | *BCLAF1* |
| ENST00000529522 | ENST00000392348 | *BCLAF1* |
| ENST00000529522 | ENST00000534762 | *BCLAF1* |
| ENST00000529522 | ENST00000527759 | *BCLAF1* |
| ENST00000529522 | ENST00000031135 | *BCLAF1* |
| ENST00000529522 | ENST00000527536 | *BCLAF1* |
| ENST00000529522 | ENST00000353331 | *BCLAF1* |
| ENST00000538285 | ENST00000377673 | *FAM216A* |
| ENST00000506531 | ENST00000308440 | *ANKRD13D* |
| ENST00000506531 | ENST00000514166 | *ANKRD13D* |
| ENST00000506531 | ENST00000447274 | *ANKRD13D* |
| ENST00000506531 | ENST00000511455 | *ANKRD13D* |
| ENST00000509907 | ENST00000514328 | *CAMK2D* |
| ENST00000509907 | ENST00000394526 | *CAMK2D* |
| ENST00000509907 | ENST00000394524 | *CAMK2D* |
| ENST00000509907 | ENST00000454265 | *CAMK2D* |
| ENST00000509907 | ENST00000296402 | *CAMK2D* |
| ENST00000509907 | ENST00000429180 | *CAMK2D* |
| ENST00000509907 | ENST00000379773 | *CAMK2D* |
| ENST00000509907 | ENST00000505990 | *CAMK2D* |
| ENST00000509907 | ENST00000342666 | *CAMK2D* |
| ENST00000509907 | ENST00000418639 | *CAMK2D* |
| ENST00000509907 | ENST00000511664 | *CAMK2D* |
| ENST00000509907 | ENST00000508738 | *CAMK2D* |
| ENST00000509907 | ENST00000515496 | *CAMK2D* |
| ENST00000509907 | ENST00000394522 | *CAMK2D* |
| NR_027840 | ENST00000424384 | *FYTTD1* |
| NR_027840 | ENST00000241502 | *FYTTD1* |
| NR_027840 | ENST00000428395 | *FYTTD1* |
| NR_027840 | ENST00000415708 | *FYTTD1* |
| NR_027840 | ENST00000426031 | *FYTTD1* |
| NR_027840 | ENST00000428738 | *FYTTD1* |
| ENST00000515578 | ENST00000511833 | *ZNF721* |
| ENST00000515578 | ENST00000506646 | *ZNF721* |
| ENST00000515578 | ENST00000505900 | *ZNF721* |
| TCONS_00426215 | ENST00000319264 | *LURAP1L* |
| ENST00000477537 | ENST00000438510 | *HLA-DMB* |
| ENST00000477537 | ENST00000416244 | *HLA-DMB* |
| ENST00000477537 | ENST00000418107 | *HLA-DMB* |
| ENST00000477537 | ENST00000414017 | *HLA-DMB* |
| ENST00000590777 | ENST00000592264 | *ZNF397* |
| ENST00000472616 | ENST00000006967 | *JHDM1D* |
| ENST00000472616 | ENST00000397560 | *JHDM1D* |
| lnc-LRIG2-4:2 | ENST00000429288 | *SLC16A1* |
| NONHSAT048360 | ENST00000268154 | *ZNF710* |
| ENST00000473151 | ENST00000414679 | *PLCB4* |
| ENST00000473151 | ENST00000278655 | *PLCB4* |
| ENST00000473151 | ENST00000378501 | *PLCB4* |
| ENST00000473151 | ENST00000334005 | *PLCB4* |
| ENST00000473151 | ENST00000378473 | *PLCB4* |
| ENST00000473151 | ENST00000378493 | *PLCB4* |
| ENST00000529955 | ENST00000455748 | *BBS1* |
| ENST00000529955 | ENST00000525809 | *BBS1* |
| ENST00000529955 | ENST00000526815 | *BBS1* |
| ENST00000529955 | ENST00000318312 | *BBS1* |
| ENST00000529955 | ENST00000524705 | *BBS1* |
| ENST00000529955 | ENST00000419755 | *CTD-3074O7.11* |
| ENST00000529955 | ENST00000393994 | *BBS1* |
| ENST00000529955 | ENST00000537537 | *BBS1* |
| NR_072999 | ENST00000480456 | *JAM2* |
| NR_072999 | ENST00000400532 | *JAM2* |
| NR_072999 | ENST00000312957 | *JAM2* |
| NR_072999 | ENST00000425221 | *JAM2* |
| NONHSAG021486 | ENST00000318217 | *MYO1D* |
| NONHSAG021486 | ENST00000394649 | *MYO1D* |
| NR_103492 | ENST00000409547 | *GIGYF2* |
| NR_103492 | ENST00000436349 | *GIGYF2* |
| NR_103492 | ENST00000428883 | *GIGYF2* |
| NR_103492 | ENST00000421778 | *GIGYF2* |
| NR_103492 | ENST00000421433 | *GIGYF2* |
| NR_103492 | ENST00000440945 | *GIGYF2* |
| NR_103492 | ENST00000373563 | *GIGYF2* |
| NR_103492 | ENST00000373566 | *GIGYF2* |
| NR_103492 | ENST00000445650 | *GIGYF2* |
| NR_103492 | ENST00000455139 | *GIGYF2* |
| NR_103492 | ENST00000425040 | *GIGYF2* |
| NR_103492 | ENST00000409196 | *GIGYF2* |
| NR_103492 | ENST00000423659 | *GIGYF2* |
| NR_103492 | ENST00000426102 | *GIGYF2* |
| NR_103492 | ENST00000409480 | *GIGYF2* |
| NR_103492 | ENST00000448993 | *C2ORF82* |
| NR_103492 | ENST00000410033 | *GIGYF2* |
| NR_103492 | ENST00000456491 | *GIGYF2* |
| NR_103492 | ENST00000427233 | *GIGYF2* |
| NR_103492 | ENST00000424414 | *GIGYF2* |
| NR_103492 | ENST00000430720 | *GIGYF2* |
| NR_103492 | ENST00000427649 | *GIGYF2* |
| NR_103492 | ENST00000452341 | *GIGYF2* |
| NR_103492 | ENST00000409451 | *GIGYF2* |
| NR_103492 | ENST00000429187 | *GIGYF2* |
| ENST00000441131 | ENST00000412516 | *DHRSX* |
| ENST00000441131 | ENST00000334651 | *DHRSX* |
| ENST00000441131 | ENST00000444280 | *DHRSX* |
| ENST00000560704 | ENST00000299338 | *FAM227B* |
| ENST00000560704 | ENST00000561064 | *FAM227B* |
| ENST00000373963 | ENST00000273075 | *DNPEP* |
| ENST00000373963 | ENST00000434339 | *DNPEP* |
| ENST00000373963 | ENST00000322176 | *DNPEP* |
| ENST00000373963 | ENST00000430206 | *DNPEP* |
| ENST00000373963 | ENST00000429013 | *DNPEP* |
| ENST00000373963 | ENST00000519905 | *DNPEP* |
| ENST00000373963 | ENST00000521459 | *DNPEP* |
| ENST00000373963 | ENST00000523282 | *DNPEP* |
| ENST00000373963 | ENST00000373972 | *DNPEP* |
| ENST00000373963 | ENST00000457935 | *DNPEP* |
| NONHSAG037410 | ENST00000451522 | *TBC1D14* |
| NONHSAG037410 | ENST00000410031 | *TBC1D14* |
| NONHSAG037410 | ENST00000448507 | *TBC1D14* |
| NONHSAG037410 | ENST00000409757 | *TBC1D14* |
| ENST00000559963 | ENST00000396509 | *GALK2* |
| ENST00000559963 | ENST00000560138 | *GALK2* |
| ENST00000559963 | ENST00000559454 | *GALK2* |
| ENST00000559963 | ENST00000327171 | *GALK2* |
| ENST00000559963 | ENST00000560654 | *GALK2* |
| ENST00000559963 | ENST00000544523 | *GALK2* |
| ENST00000559963 | ENST00000543495 | *GALK2* |
| ENST00000559963 | ENST00000558145 | *GALK2* |
| ENST00000559963 | ENST00000560031 | *GALK2* |
| ENST00000496202 | ENST00000324862 | *PRPF3* |
| ENST00000496202 | ENST00000414970 | *PRPF3* |
| ENST00000496202 | ENST00000543398 | *PRPF3* |
| ENST00000468819 | ENST00000433111 | *TNK2* |
| ENST00000468819 | ENST00000427576 | *TNK2* |
| ENST00000468819 | ENST00000333602 | *TNK2* |
| ENST00000468819 | ENST00000392400 | *TNK2* |
| ENST00000468819 | ENST00000428187 | *TNK2* |
| ENST00000468819 | ENST00000438207 | *TNK2* |
| ENST00000468819 | ENST00000381916 | *TNK2* |
| ENST00000468819 | ENST00000316664 | *TNK2* |
| ENST00000579809 | ENST00000579016 | *ENGASE* |
| ENST00000591007 | ENST00000247001 | *SUGP1* |
| ENST00000591007 | ENST00000590439 | *SUGP1* |
| ENST00000432943 | ENST00000434620 | *COL14A1* |
| ENST00000432943 | ENST00000247781 | *COL14A1* |
| ENST00000432943 | ENST00000537875 | *COL14A1* |
| ENST00000432943 | ENST00000309791 | *COL14A1* |
| ENST00000432943 | ENST00000297848 | *COL14A1* |
| ENST00000432943 | ENST00000523142 | *COL14A1* |
| ENST00000472108 | ENST00000372429 | *USP20* |
| ENST00000472108 | ENST00000315480 | *USP20* |
| ENST00000472108 | ENST00000358355 | *USP20* |
| ENST00000505341 | ENST00000513601 | *C15ORF40* |
| ENST00000505341 | ENST00000538348 | *C15ORF40* |
| ENST00000505341 | ENST00000304177 | *C15ORF40* |
| ENST00000505341 | ENST00000514272 | *C15ORF40* |
| ENST00000505341 | ENST00000510873 | *C15ORF40* |
| ENST00000505341 | ENST00000451195 | *C15ORF40* |
| ENST00000505341 | ENST00000508990 | *C15ORF40* |
| ENST00000505341 | ENST00000565712 | *C15ORF40* |
| NONHSAG012254 | ENST00000338373 | *GIT2* |
| NONHSAG012254 | ENST00000457474 | *GIT2* |
| NONHSAG012254 | ENST00000355312 | *GIT2* |
| NONHSAG012254 | ENST00000551209 | *GIT2* |
| NONHSAG012254 | ENST00000360185 | *GIT2* |
| NONHSAG012254 | ENST00000550186 | *GIT2* |
| NONHSAG012254 | ENST00000354574 | *GIT2* |
| NONHSAG012254 | ENST00000361006 | *GIT2* |
| NONHSAG012254 | ENST00000553118 | *GIT2* |
| NONHSAG012254 | ENST00000343646 | *GIT2* |
| NONHSAG012254 | ENST00000356259 | *GIT2* |
| ENST00000392688 | ENST00000368799 | *FLG* |
| ENST00000558914 | ENST00000558325 | *RP11-468E2.6* |
| ENST00000558914 | ENST00000559115 | *DCAF11* |
| ENST00000558914 | ENST00000559593 | *DCAF11* |
| ENST00000558914 | ENST00000561041 | *DCAF11* |
| ENST00000558914 | ENST00000561375 | *DCAF11* |
| ENST00000558914 | ENST00000559288 | *DCAF11* |
| ENST00000558914 | ENST00000558408 | *DCAF11* |
| ENST00000558914 | ENST00000558638 | *DCAF11* |
| ENST00000558914 | ENST00000560459 | *DCAF11* |
| ENST00000558914 | ENST00000559382 | *DCAF11* |
| ENST00000558914 | ENST00000558215 | *DCAF11* |
| ENST00000558914 | ENST00000396936 | *DCAF11* |
| ENST00000558914 | ENST00000557810 | *DCAF11* |
| ENST00000558914 | ENST00000559796 | *DCAF11* |
| ENST00000558914 | ENST00000559354 | *DCAF11* |
| ENST00000558914 | ENST00000446197 | *DCAF11* |
| ENST00000558914 | ENST00000396941 | *DCAF11* |
| ENST00000558914 | ENST00000560713 | *DCAF11* |
| ENST00000558914 | ENST00000559396 | *DCAF11* |
| ENST00000558914 | ENST00000559144 | *DCAF11* |
| ENST00000558914 | ENST00000561001 | *DCAF11* |
| ENST00000558914 | ENST00000559017 | *DCAF11* |
| ENST00000558914 | ENST00000560901 | *DCAF11* |
| ENST00000528337 | ENST00000526722 | *WAC* |
| ENST00000528337 | ENST00000375664 | *WAC* |
| ENST00000528337 | ENST00000347934 | *WAC* |
| ENST00000528337 | ENST00000375646 | *WAC* |
| ENST00000413891 | ENST00000456909 | *STK11IP* |
| ENST00000413891 | ENST00000447191 | *STK11IP* |
| ENST00000413891 | ENST00000295641 | *STK11IP* |
| ENST00000488618 | ENST00000372806 | *STK4* |
| ENST00000488618 | ENST00000499879 | *STK4* |
| ENST00000488618 | ENST00000372801 | *STK4* |
| ENST00000488618 | ENST00000396731 | *STK4* |
| ENST00000450765 | ENST00000440934 | *ZNF142* |
| ENST00000450765 | ENST00000450560 | *ZNF142* |
| ENST00000450765 | ENST00000411696 | *ZNF142* |
| ENST00000450765 | ENST00000432460 | *ZNF142* |
| ENST00000450765 | ENST00000449707 | *ZNF142* |
| ENST00000487406 | ENST00000319725 | *FUBP3* |
| ENST00000481734 | ENST00000440121 | *TTC21A* |
| ENST00000481734 | ENST00000301819 | *TTC21A* |
| ENST00000481734 | ENST00000431162 | *TTC21A* |
| ENST00000469211 | ENST00000375022 | *TRO* |
| ENST00000469211 | ENST00000399736 | *TRO* |
| ENST00000469211 | ENST00000375041 | *TRO* |
| ENST00000469211 | ENST00000319167 | *TRO* |
| ENST00000469211 | ENST00000173898 | *TRO* |
| ENST00000469211 | ENST00000420798 | *TRO* |
| ENST00000599814 | ENST00000602061 | *SYMPK* |
| ENST00000599814 | ENST00000245934 | *SYMPK* |
| ENST00000599814 | ENST00000594293 | *SYMPK* |
| ENST00000599814 | ENST00000601600 | *SYMPK* |
| ENST00000599814 | ENST00000598059 | *SYMPK* |
| ENST00000495014 | ENST00000317502 | *MTG1* |
| ENST00000495014 | ENST00000432508 | *MTG1* |
| ENST00000495014 | ENST00000477902 | *MTG1* |
| ENST00000495014 | ENST00000468317 | *RP11-108K14.8* |
| ENST00000483247 | ENST00000485727 | *CCDC14* |
| ENST00000483247 | ENST00000419247 | *CCDC14* |
| ENST00000483247 | ENST00000488653 | *CCDC14* |
| ENST00000483247 | ENST00000310351 | *CCDC14* |
| ENST00000483247 | ENST00000433542 | *CCDC14* |
| ENST00000483247 | ENST00000409697 | *CCDC14* |
| ENST00000483247 | ENST00000489746 | *CCDC14* |
| UCSC_TCONS_l2_00030280 | ENST00000423738 | *ARMCX4* |
| ENST00000521939 | ENST00000231572 | *RARS* |
| ENST00000521939 | ENST00000538719 | *RARS* |
| NONHSAT066144 | ENST00000592533 | *ZNF540* |
| ENST00000466657 | ENST00000060969 | *SIKE1* |
| ENST00000466657 | ENST00000369528 | *SIKE1* |
| ENST00000552703 | ENST00000551374 | *SLC38A2* |
| ENST00000552703 | ENST00000256689 | *SLC38A2* |
| ENST00000483788 | ENST00000371221 | *ALDH18A1* |
| ENST00000483788 | ENST00000371224 | *ALDH18A1* |
| ENST00000535009 | ENST00000294309 | *TPCN2* |
| ENST00000535009 | ENST00000542467 | *TPCN2* |
| ENST00000492423 | ENST00000409295 | *COPS7B* |
| ENST00000492423 | ENST00000409091 | *COPS7B* |
| ENST00000489142 | ENST00000432306 | *VTI1A* |
| ENST00000489142 | ENST00000393077 | *VTI1A* |
| ENST00000563539 | ENST00000569482 | *MAN2C1* |
| ENST00000563539 | ENST00000568374 | *MAN2C1* |
| ENST00000563539 | ENST00000565683 | *MAN2C1* |
| ENST00000563539 | ENST00000563622 | *MAN2C1* |
| ENST00000563539 | ENST00000561615 | *MAN2C1* |
| ENST00000563539 | ENST00000267978 | *MAN2C1* |
| ENST00000563539 | ENST00000566256 | *MAN2C1* |
| ENST00000474970 | ENST00000447712 | *FGFR1* |
| ENST00000474970 | ENST00000326324 | *FGFR1* |
| ENST00000474970 | ENST00000335922 | *FGFR1* |
| ENST00000474970 | ENST00000425967 | *FGFR1* |
| ENST00000474970 | ENST00000533668 | *FGFR1* |
| ENST00000474970 | ENST00000434187 | *FGFR1* |
| ENST00000474970 | ENST00000341462 | *FGFR1* |
| ENST00000474970 | ENST00000397108 | *FGFR1* |
| ENST00000474970 | ENST00000526742 | *FGFR1* |
| ENST00000474970 | ENST00000413133 | *FGFR1* |
| ENST00000474970 | ENST00000525001 | *FGFR1* |
| ENST00000474970 | ENST00000397113 | *FGFR1* |
| ENST00000474970 | ENST00000530568 | *FGFR1* |
| ENST00000474970 | ENST00000356207 | *FGFR1* |
| ENST00000474970 | ENST00000529552 | *FGFR1* |
| ENST00000474970 | ENST00000397091 | *FGFR1* |
| ENST00000474970 | ENST00000397103 | *FGFR1* |
| ENST00000474970 | ENST00000532791 | *FGFR1* |
| NR_073135 | ENST00000422379 | *HPS4* |
| NR_073135 | ENST00000402105 | *HPS4* |
| NR_073135 | ENST00000398145 | *HPS4* |
| NR_073135 | ENST00000336873 | *HPS4* |
| NR_073135 | ENST00000398141 | *HPS4* |
| ENST00000465772 | ENST00000356940 | *RAB18* |
| ENST00000465772 | ENST00000375802 | *RAB18* |
| ENST00000465772 | ENST00000423465 | *RAB18* |
| ENST00000465772 | ENST00000535776 | *RAB18* |
| ENST00000518227 | ENST00000521374 | *HSF4* |
| ENST00000518227 | ENST00000584272 | *HSF4* |
| ENST00000518227 | ENST00000421453 | *HSF4* |
| ENST00000518227 | ENST00000264009 | *HSF4* |
| ENST00000518227 | ENST00000519917 | *FBXL8* |
| ENST00000518227 | ENST00000517729 | *HSF4* |
| ENST00000518227 | ENST00000258200 | *FBXL8* |
| ENST00000518227 | ENST00000517685 | *HSF4* |
| ENST00000518227 | ENST00000517382 | *FBXL8* |
| ENST00000482060 | ENST00000383177 | *C2* |
| ENST00000482060 | ENST00000494905 | *C2* |
| ENST00000482060 | ENST00000456570 | *CFB* |
| ENST00000482060 | ENST00000447952 | *C2* |
| ENST00000482060 | ENST00000442278 | *C2* |
| ENST00000482060 | ENST00000418949 | *C2* |
| ENST00000482060 | ENST00000452323 | *C2* |
| ENST00000482060 | ENST00000413154 | *C2* |
| ENST00000482060 | ENST00000477310 | *CFB* |
| ENST00000482060 | ENST00000556679 | *CFB* |
| ENST00000482060 | ENST00000497706 | *C2* |
| ENST00000482060 | ENST00000452202 | *C2* |
| ENST00000482060 | ENST00000469372 | *C2* |
| ENST00000482060 | ENST00000299367 | *C2* |
| ENST00000482856 | ENST00000284476 | *DISP1* |
| ENST00000482856 | ENST00000360254 | *DISP1* |
| ENST00000504639 | ENST00000436644 | *PAIP1* |
| ENST00000504639 | ENST00000508537 | *PAIP1* |
| ENST00000504639 | ENST00000504075 | *PAIP1* |
| ENST00000504639 | ENST00000514816 | *PAIP1* |
| ENST00000504639 | ENST00000515338 | *PAIP1* |
| ENST00000504639 | ENST00000306846 | *PAIP1* |
| ENST00000504639 | ENST00000338972 | *PAIP1* |
| ENST00000504639 | ENST00000514514 | *PAIP1* |
| ENST00000504639 | ENST00000511321 | *PAIP1* |
| ENST00000324554 | ENST00000594190 | *USHBP1* |
| ENST00000324554 | ENST00000252597 | *USHBP1* |
| ENST00000324554 | ENST00000598309 | *USHBP1* |
| ENST00000324554 | ENST00000431146 | *USHBP1* |
| ENST00000324554 | ENST00000594059 | *AC010646.3* |
| ENST00000526494 | ENST00000532820 | *CAPRIN1* |
| ENST00000526494 | ENST00000389645 | *CAPRIN1* |
| ENST00000526494 | ENST00000530820 | *CAPRIN1* |
| ENST00000526494 | ENST00000529307 | *CAPRIN1* |
| ENST00000526494 | ENST00000534825 | *CAPRIN1* |
| ENST00000526494 | ENST00000341394 | *CAPRIN1* |
| ENST00000567843 | ENST00000569653 | *GTF3C1* |
| ENST00000544227 | ENST00000286614 | *MMP16* |
| ENST00000544227 | ENST00000522726 | *MMP16* |
| ENST00000216520 | ENST00000557016 | *ERH* |
| ENST00000216520 | ENST00000555373 | *ERH* |
| ENST00000525200 | ENST00000539574 | *NADSYN1* |
| ENST00000525200 | ENST00000530055 | *NADSYN1* |
| ENST00000525200 | ENST00000529840 | *NADSYN1* |
| ENST00000525200 | ENST00000319023 | *NADSYN1* |
| ENST00000342075 | ENST00000420421 | *PMS1* |
| ENST00000342075 | ENST00000424766 | *PMS1* |
| ENST00000342075 | ENST00000452382 | *PMS1* |
| ENST00000342075 | ENST00000418224 | *PMS1* |
| ENST00000342075 | ENST00000374826 | *PMS1* |
| ENST00000342075 | ENST00000432292 | *PMS1* |
| ENST00000342075 | ENST00000409593 | *PMS1* |
| ENST00000342075 | ENST00000446877 | *PMS1* |
| ENST00000342075 | ENST00000409985 | *PMS1* |
| ENST00000342075 | ENST00000441310 | *PMS1* |
| ENST00000342075 | ENST00000409823 | *PMS1* |
| ENST00000342075 | ENST00000424307 | *PMS1* |
| ENST00000342075 | ENST00000447232 | *PMS1* |
| NONHSAG029866 | ENST00000272732 | *SCRN3* |
| NONHSAG029866 | ENST00000409673 | *SCRN3* |
| ENST00000525308 | ENST00000525087 | *GPAA1* |
| ENST00000525308 | ENST00000524418 | *GPAA1* |
| ENST00000525308 | ENST00000530258 | *GPAA1* |
| ENST00000525308 | ENST00000361036 | *GPAA1* |
| ENST00000525308 | ENST00000355091 | *GPAA1* |
| ENST00000554781 | ENST00000559167 | *ADCY4* |
| ENST00000554781 | ENST00000396747 | *ADCY4* |
| ENST00000554781 | ENST00000310677 | *ADCY4* |
| ENST00000554781 | ENST00000561138 | *ADCY4* |
| ENST00000554781 | ENST00000418030 | *ADCY4* |
| ENST00000554781 | ENST00000554068 | *ADCY4* |
| ENST00000554781 | ENST00000556932 | *ADCY4* |
| ENST00000554781 | ENST00000555591 | *RP11-934B9.3* |
| NONHSAT021253 | ENST00000310513 | *CELF1* |
| NONHSAT021253 | ENST00000532048 | *CELF1* |
| NONHSAT021253 | ENST00000531165 | *CELF1* |
| NONHSAT021253 | ENST00000395290 | *CELF1* |
| ENST00000510003 | ENST00000508681 | *SNCAIP* |
| ENST00000510003 | ENST00000379533 | *SNCAIP* |
| ENST00000510003 | ENST00000379538 | *SNCAIP* |
| ENST00000510003 | ENST00000261368 | *SNCAIP* |
| ENST00000510003 | ENST00000542191 | *SNCAIP* |
| ENST00000510003 | ENST00000504884 | *SNCAIP* |
| ENST00000510003 | ENST00000509652 | *SNCAIP* |
| ENST00000510003 | ENST00000509154 | *SNCAIP* |
| ENST00000510003 | ENST00000514467 | *SNCAIP* |
| ENST00000510003 | ENST00000514497 | *SNCAIP* |
| ENST00000510003 | ENST00000503116 | *SNCAIP* |
| ENST00000510003 | ENST00000506272 | *SNCAIP* |
| ENST00000510003 | ENST00000414317 | *SNCAIP* |
| ENST00000510003 | ENST00000379536 | *SNCAIP* |
| ENST00000510003 | ENST00000261367 | *SNCAIP* |
| ENST00000515734 | ENST00000502484 | *PDE4D* |
| ENST00000515734 | ENST00000505507 | *PDE4D* |
| ENST00000480107 | ENST00000310317 | *SLC4A2* |
| ENST00000480107 | ENST00000413384 | *SLC4A2* |
| ENST00000480107 | ENST00000461735 | *SLC4A2* |
| ENST00000480107 | ENST00000485713 | *SLC4A2* |
| ENST00000480107 | ENST00000392826 | *SLC4A2* |
| ENST00000505447 | ENST00000360265 | *AFAP1* |
| ENST00000505447 | ENST00000382543 | *AFAP1* |
| ENST00000505447 | ENST00000358461 | *AFAP1* |
| ENST00000505447 | ENST00000420658 | *AFAP1* |
| ENST00000028008 | ENST00000366855 | *RNASET2* |
| ENST00000028008 | ENST00000476238 | *RNASET2* |
| ENST00000028008 | ENST00000508775 | *RNASET2* |
| ENST00000028008 | ENST00000507747 | *RP11-514O12.4* |
| ENST00000028008 | ENST00000478180 | *RNASET2* |
| ENST00000592314 | ENST00000586396 | *SF3A2* |
| ENST00000592314 | ENST00000221494 | *SF3A2* |
| ENST00000526469 | ENST00000262580 | *GSDMD* |
| ENST00000526469 | ENST00000533888 | *GSDMD* |
| ENST00000526469 | ENST00000534018 | *GSDMD* |
| ENST00000526469 | ENST00000525208 | *GSDMD* |
| ENST00000526469 | ENST00000533063 | *GSDMD* |
| ENST00000526469 | ENST00000526406 | *GSDMD* |
| ENST00000526469 | ENST00000533348 | *GSDMD* |
| ENST00000485812 | ENST00000374065 | *TIMM23* |
| ENST00000485812 | ENST00000260867 | *TIMM23* |
| ENST00000485812 | ENST00000374064 | *TIMM23* |
| ENST00000485812 | ENST00000444743 | *TIMM23* |
| NR_046384 | ENST00000221265 | *PAF1* |
| NR_046384 | ENST00000595379 | *PAF1* |
| NR_046384 | ENST00000221266 | *PAF1* |
| NR_046384 | ENST00000595564 | *PAF1* |
| ENST00000470466 | ENST00000392282 | *TAB2* |
| ENST00000470466 | ENST00000606797 | *TAB2* |
| ENST00000470466 | ENST00000606202 | *TAB2* |
| ENST00000470466 | ENST00000367456 | *TAB2* |
| ENST00000470466 | ENST00000538427 | *TAB2* |
| ENST00000470466 | ENST00000536230 | *TAB2* |
| ENST00000470466 | ENST00000286332 | *TAB2* |
| NONHSAG008430 | ENST00000528215 | *MS4A7* |
| NONHSAG008430 | ENST00000534016 | *MS4A7* |
| NONHSAG008430 | ENST00000300184 | *MS4A7* |
| NONHSAG008430 | ENST00000358246 | *MS4A7* |
| NONHSAG008430 | ENST00000531787 | *MS4A14* |
| NONHSAG008430 | ENST00000530614 | *MS4A7* |
| NONHSAG008430 | ENST00000530027 | *MS4A7* |
| NONHSAG008430 | ENST00000530234 | *MS4A7* |
| ENST00000475882 | ENST00000367858 | *SGK1* |
| ENST00000475882 | ENST00000528577 | *SGK1* |
| ENST00000475882 | ENST00000413996 | *SGK1* |
| ENST00000475882 | ENST00000475719 | *SGK1* |
| ENST00000475882 | ENST00000461976 | *SGK1* |
| ENST00000475882 | ENST00000367857 | *SGK1* |
| ENST00000475882 | ENST00000237305 | *SGK1* |
| NONHSAT143108 | ENST00000360461 | *PLEKHG4* |
| NONHSAT143108 | ENST00000567247 | *SLC9A5* |
| NONHSAT143108 | ENST00000562144 | *PLEKHG4* |
| NONHSAT143108 | ENST00000566626 | *SLC9A5* |
| NONHSAT143108 | ENST00000299798 | *SLC9A5* |
| ENST00000359551 | ENST00000398712 | *SHARPIN* |
| ENST00000359551 | ENST00000532536 | *SHARPIN* |
| ENST00000461965 | ENST00000457316 | *GLS* |
| ENST00000461965 | ENST00000338435 | *GLS* |
| ENST00000461965 | ENST00000320717 | *GLS* |
| ENST00000461965 | ENST00000409626 | *GLS* |
| ENST00000444314 | ENST00000252268 | *DPF2* |
| ENST00000444314 | ENST00000528416 | *DPF2* |
| ENST00000444314 | ENST00000415073 | *DPF2* |
| ENST00000544838 | ENST00000536408 | *TCHP* |
| ENST00000544838 | ENST00000312777 | *TCHP* |
| ENST00000544838 | ENST00000405876 | *TCHP* |
| ENST00000589285 | ENST00000592533 | *ZNF540* |
| ENST00000589285 | ENST00000343599 | *ZNF540* |
| ENST00000589285 | ENST00000586134 | *ZNF540* |
| ENST00000589285 | ENST00000586792 | *ZNF540* |
| ENST00000589285 | ENST00000589117 | *ZNF540* |
| ENST00000589285 | ENST00000316433 | *ZNF540* |
| ENST00000589285 | ENST00000590588 | *ZNF540* |
| ENST00000492556 | ENST00000440709 | *CPT1B* |
| ENST00000492556 | ENST00000395650 | *CPT1B* |
| ENST00000492556 | ENST00000405237 | *CPT1B* |
| ENST00000492556 | ENST00000360719 | *CPT1B* |
| ENST00000492556 | ENST00000417176 | *CPT1B* |
| ENST00000492556 | ENST00000406938 | *CHKB* |
| ENST00000492556 | ENST00000434492 | *CPT1B* |
| ENST00000492556 | ENST00000312108 | *CPT1B* |
| ENST00000492556 | ENST00000457250 | *CPT1B* |
| ENST00000492845 | ENST00000469045 | *NADK* |
| ENST00000492845 | ENST00000400922 | *NADK* |
| ENST00000492845 | ENST00000341991 | *NADK* |
| ENST00000492845 | ENST00000378625 | *NADK* |
| ENST00000492845 | ENST00000344463 | *NADK* |
| ENST00000492845 | ENST00000341426 | *NADK* |
| ENST00000492845 | ENST00000342348 | *NADK* |
| ENST00000491735 | ENST00000427898 | *IDI1* |
| ENST00000491735 | ENST00000429642 | *IDI1* |
| ENST00000491735 | ENST00000381344 | *IDI1* |
| ENST00000479516 | ENST00000498460 | *RNF8* |
| ENST00000479516 | ENST00000394443 | *RNF8* |
| ENST00000479516 | ENST00000487950 | *RNF8* |
| ENST00000479516 | ENST00000373479 | *RNF8* |
| ENST00000479516 | ENST00000469731 | *RNF8* |
| ENST00000562753 | ENST00000562812 | *CDYL2* |
| ENST00000562753 | ENST00000570137 | *CDYL2* |
| ENST00000562753 | ENST00000566173 | *CDYL2* |
| ENST00000562753 | ENST00000563890 | *CDYL2* |
| ENST00000468041 | ENST00000361226 | *RUSC2* |
| ENST00000468041 | ENST00000455600 | *RUSC2* |
| ENST00000538571 | ENST00000555397 | *KIAA0586* |
| ENST00000538571 | ENST00000554463 | *KIAA0586* |
| ENST00000538571 | ENST00000261244 | *KIAA0586* |
| ENST00000538571 | ENST00000555833 | *KIAA0586* |
| ENST00000538571 | ENST00000423743 | *KIAA0586* |
| ENST00000538571 | ENST00000354386 | *KIAA0586* |
| ENST00000538571 | ENST00000556134 | *KIAA0586* |
| ENST00000534686 | ENST00000334636 | *CYP2R1* |
| ENST00000534686 | ENST00000532378 | *CYP2R1* |
| ENST00000512932 | ENST00000507051 | *SEC31A* |
| ENST00000512932 | ENST00000507676 | *SEC31A* |
| ENST00000512932 | ENST00000506495 | *SEC31A* |
| ENST00000512932 | ENST00000503210 | *SEC31A* |
| ENST00000512932 | ENST00000355196 | *SEC31A* |
| ENST00000311420 | ENST00000356290 | *MDM2* |
| ENST00000311420 | ENST00000545204 | *MDM2* |
| ENST00000311420 | ENST00000428863 | *MDM2* |
| ENST00000311420 | ENST00000360430 | *MDM2* |
| ENST00000311420 | ENST00000393410 | *MDM2* |
| ENST00000311420 | ENST00000543323 | *MDM2* |
| ENST00000311420 | ENST00000348801 | *MDM2* |
| ENST00000311420 | ENST00000258148 | *MDM2* |
| ENST00000311420 | ENST00000539479 | *MDM2* |
| ENST00000311420 | ENST00000299252 | *MDM2* |
| ENST00000311420 | ENST00000393415 | *MDM2* |
| ENST00000311420 | ENST00000523991 | *MDM2* |
| ENST00000311420 | ENST00000258149 | *MDM2* |
| ENST00000311420 | ENST00000478070 | *MDM2* |
| ENST00000311420 | ENST00000393416 | *MDM2* |
| ENST00000311420 | ENST00000540827 | *MDM2* |
| ENST00000311420 | ENST00000517852 | *MDM2* |
| ENST00000311420 | ENST00000350057 | *MDM2* |
| ENST00000311420 | ENST00000393413 | *MDM2* |
| ENST00000311420 | ENST00000544561 | *MDM2* |
| ENST00000311420 | ENST00000462284 | *MDM2* |
| ENST00000311420 | ENST00000393412 | *MDM2* |
| NONHSAG028363 | ENST00000409785 | *KCMF1* |
| NONHSAG028363 | ENST00000456682 | *KCMF1* |
| NONHSAT077197 | ENST00000341329 | *RHBDD1* |
| NONHSAT077197 | ENST00000392062 | *RHBDD1* |
| NONHSAT077197 | ENST00000409053 | *RHBDD1* |
| ENST00000563765 | ENST00000349777 | *SNAP23* |
| ENST00000563765 | ENST00000568859 | *SNAP23* |
| ENST00000563765 | ENST00000563830 | *SNAP23* |
| ENST00000563765 | ENST00000561526 | *SNAP23* |
| ENST00000563765 | ENST00000563873 | *SNAP23* |
| ENST00000563765 | ENST00000564153 | *SNAP23* |
| ENST00000563765 | ENST00000567094 | *SNAP23* |
| ENST00000563765 | ENST00000566327 | *SNAP23* |
| ENST00000563765 | ENST00000397138 | *SNAP23* |
| ENST00000563765 | ENST00000249647 | *SNAP23* |
| ENST00000563765 | ENST00000568841 | *SNAP23* |
| ENST00000486533 | ENST00000345356 | *COL12A1* |
| ENST00000604892 | ENST00000271375 | *SFT2D2* |
| ENST00000474657 | ENST00000400137 | *FKBP1A* |
| ENST00000474657 | ENST00000381724 | *FKBP1A* |
| ENST00000474657 | ENST00000439640 | *FKBP1A* |
| ENST00000474657 | ENST00000381715 | *FKBP1A* |
| ENST00000474657 | ENST00000381719 | *FKBP1A* |
| ENST00000568020 | ENST00000268616 | *ZCCHC14* |
| ENST00000568020 | ENST00000561928 | *ZCCHC14* |
| ENST00000554523 | ENST00000555452 | *ZFYVE26* |
| ENST00000554523 | ENST00000347230 | *ZFYVE26* |
| ENST00000554523 | ENST00000557306 | *ZFYVE26* |
| NONHSAT037250 | ENST00000555542 | *PRKCH* |
| NONHSAT037250 | ENST00000556778 | *PRKCH* |
| NONHSAT037250 | ENST00000555906 | *PRKCH* |
| NONHSAT037250 | ENST00000555185 | *PRKCH* |
| NONHSAT037250 | ENST00000557294 | *PRKCH* |
| ENST00000527181 | ENST00000524755 | *C11ORF65* |
| ENST00000527181 | ENST00000525729 | *C11ORF65* |
| ENST00000591499 | ENST00000590881 | *RAD23A* |
| ENST00000591499 | ENST00000316856 | *RAD23A* |
| ENST00000591499 | ENST00000541222 | *RAD23A* |
| ENST00000591499 | ENST00000592268 | *RAD23A* |
| ENST00000591499 | ENST00000586534 | *RAD23A* |
| ENST00000492824 | ENST00000406732 | *MTMR11* |
| ENST00000492824 | ENST00000439741 | *MTMR11* |
| ENST00000492824 | ENST00000361405 | *MTMR11* |
| ENST00000492824 | ENST00000369140 | *MTMR11* |
| ENST00000589874 | ENST00000336761 | *DAZAP1* |
| ENST00000589874 | ENST00000233078 | *DAZAP1* |
| ENST00000589874 | ENST00000591999 | *DAZAP1* |
| ENST00000589874 | ENST00000587079 | *DAZAP1* |
| NR_038392 | ENST00000299381 | *ANAPC16* |
| ENST00000458178 | ENST00000538191 | *PPM1F* |
| ENST00000458178 | ENST00000445205 | *PPM1F* |
| ENST00000458178 | ENST00000263212 | *PPM1F* |
| ENST00000458178 | ENST00000407142 | *PPM1F* |
| ENST00000458178 | ENST00000397495 | *PPM1F* |
| ENST00000458178 | ENST00000424647 | *PPM1F* |
| ENST00000502981 | ENST00000509152 | *ZNF595* |
| ENST00000502981 | ENST00000526473 | *ZNF595* |
| NONHSAT116283 | ENST00000392092 | *TBP* |
| NONHSAT116283 | ENST00000540980 | *TBP* |
| NONHSAT116283 | ENST00000230354 | *TBP* |
| ENST00000564909 | ENST00000530615 | *DIS3L* |
| ENST00000564909 | ENST00000319194 | *DIS3L* |
| ENST00000564909 | ENST00000525109 | *DIS3L* |
| ENST00000564909 | ENST00000441424 | *DIS3L* |
| ENST00000564909 | ENST00000319212 | *DIS3L* |
| ENST00000564909 | ENST00000525134 | *DIS3L* |
| ENST00000564909 | ENST00000532580 | *DIS3L* |
| ENST00000497043 | ENST00000454076 | *IDH3G* |
| ENST00000497043 | ENST00000370093 | *IDH3G* |
| ENST00000497043 | ENST00000444450 | *IDH3G* |
| ENST00000497043 | ENST00000427365 | *IDH3G* |
| ENST00000497043 | ENST00000217901 | *IDH3G* |
| ENST00000497043 | ENST00000444338 | *IDH3G* |
| ENST00000497043 | ENST00000370092 | *IDH3G* |
| NONHSAG015896 | ENST00000553625 | *YY1* |
| NONHSAG015896 | ENST00000262238 | *YY1* |
| NONHSAG015896 | ENST00000554804 | *YY1* |
| ENST00000523609 | ENST00000524328 | *AGO2* |
| ENST00000523609 | ENST00000220592 | *AGO2* |
| ENST00000523609 | ENST00000519980 | *AGO2* |
| ENST00000580605 | ENST00000251101 | *ENOSF1* |
| ENST00000580605 | ENST00000383578 | *ENOSF1* |
| ENST00000580605 | ENST00000340116 | *ENOSF1* |
| ENST00000580605 | ENST00000583771 | *ENOSF1* |
| ENST00000580605 | ENST00000580982 | *ENOSF1* |
| ENST00000580605 | ENST00000539164 | *ENOSF1* |
| ENST00000500765 | ENST00000511976 | *FAM13A* |
| ENST00000500765 | ENST00000508369 | *FAM13A* |
| ENST00000500765 | ENST00000513837 | *FAM13A* |
| ENST00000500765 | ENST00000503556 | *FAM13A* |
| ENST00000500765 | ENST00000264344 | *FAM13A* |
| ENST00000500765 | ENST00000395002 | *FAM13A* |
| ENST00000471370 | ENST00000286494 | *ARHGEF25* |
| ENST00000471370 | ENST00000333972 | *ARHGEF25* |
| ENST00000474847 | ENST00000561311 | *TLN2* |
| ENST00000474847 | ENST00000306829 | *TLN2* |
| NR_028100 | ENST00000558408 | *DCAF11* |
| NR_028100 | ENST00000558638 | *DCAF11* |
| NR_028100 | ENST00000560459 | *DCAF11* |
| NR_028100 | ENST00000558215 | *DCAF11* |
| NR_028100 | ENST00000559382 | *DCAF11* |
| NR_028100 | ENST00000396936 | *DCAF11* |
| NR_028100 | ENST00000558325 | *RP11-468E2.6* |
| NR_028100 | ENST00000559115 | *DCAF11* |
| NR_028100 | ENST00000559593 | *DCAF11* |
| NR_028100 | ENST00000561041 | *DCAF11* |
| NR_028100 | ENST00000561375 | *DCAF11* |
| NR_028100 | ENST00000559288 | *DCAF11* |
| NR_028100 | ENST00000559396 | *DCAF11* |
| NR_028100 | ENST00000559144 | *DCAF11* |
| NR_028100 | ENST00000561001 | *DCAF11* |
| NR_028100 | ENST00000559017 | *DCAF11* |
| NR_028100 | ENST00000560901 | *DCAF11* |
| NR_028100 | ENST00000557810 | *DCAF11* |
| NR_028100 | ENST00000559796 | *DCAF11* |
| NR_028100 | ENST00000559354 | *DCAF11* |
| NR_028100 | ENST00000446197 | *DCAF11* |
| NR_028100 | ENST00000560713 | *DCAF11* |
| NR_028100 | ENST00000396941 | *DCAF11* |
| ENST00000558357 | ENST00000361937 | *INO80* |
| ENST00000558357 | ENST00000401393 | *INO80* |
| ENST00000484440 | ENST00000453542 | *GPAT2* |
| ENST00000484440 | ENST00000359548 | *GPAT2* |
| ENST00000484440 | ENST00000377137 | *GPAT2* |
| ENST00000484440 | ENST00000434632 | *GPAT2* |
| ENST00000484440 | ENST00000439254 | *GPAT2* |
| NONHSAT080906 | ENST00000370077 | *GMEB2* |
| ENST00000394848 | ENST00000579954 | *SSH2* |
| ENST00000394848 | ENST00000582084 | *SSH2* |
| ENST00000394848 | ENST00000269033 | *SSH2* |
| ENST00000394848 | ENST00000590153 | *SSH2* |
| ENST00000394848 | ENST00000540801 | *SSH2* |
| ENST00000394848 | ENST00000592397 | *SSH2* |
| NONHSAT006703 | ENST00000541576 | *THBS3* |
| NONHSAT006703 | ENST00000368378 | *THBS3* |
| NONHSAT006703 | ENST00000541990 | *THBS3* |
| NONHSAT006703 | ENST00000457183 | *THBS3* |
| NONHSAG022136 | ENST00000503676 | *SPOP* |
| NONHSAG022136 | ENST00000504102 | *SPOP* |
| NONHSAG022136 | ENST00000347630 | *SPOP* |
| NONHSAG022136 | ENST00000393331 | *SPOP* |
| NONHSAG022136 | ENST00000393328 | *SPOP* |
| ENST00000493804 | ENST00000409207 | *MCFD2* |
| ENST00000493804 | ENST00000444761 | *MCFD2* |
| ENST00000493804 | ENST00000409105 | *MCFD2* |
| ENST00000493804 | ENST00000409800 | *MCFD2* |
| ENST00000493804 | ENST00000409147 | *MCFD2* |
| ENST00000493804 | ENST00000409973 | *MCFD2* |
| ENST00000493804 | ENST00000319466 | *MCFD2* |
| ENST00000493804 | ENST00000409218 | *MCFD2* |
| ENST00000493804 | ENST00000412438 | *MCFD2* |
| ENST00000493804 | ENST00000409913 | *MCFD2* |
| ENST00000552548 | ENST00000551018 | *PFDN5* |
| ENST00000552548 | ENST00000351500 | *PFDN5* |
| ENST00000552548 | ENST00000334478 | *PFDN5* |
| ENST00000552548 | ENST00000549759 | *PFDN5* |
| ENST00000552548 | ENST00000550846 | *PFDN5* |
| NONHSAT104836 | ENST00000231238 | *TTC1* |
| NONHSAT104836 | ENST00000522793 | *TTC1* |
| NONHSAT104836 | ENST00000518560 | *TTC1* |
| NR_049742 | ENST00000060969 | *SIKE1* |
| NR_049742 | ENST00000369528 | *SIKE1* |
| ENST00000494983 | ENST00000432329 | *CREB1* |
| ENST00000494983 | ENST00000536726 | *CREB1* |
| ENST00000494983 | ENST00000448277 | *CREB1* |
| ENST00000494983 | ENST00000539789 | *CREB1* |
| ENST00000494983 | ENST00000430624 | *CREB1* |
| ENST00000494983 | ENST00000421139 | *CREB1* |
| ENST00000494983 | ENST00000455757 | *CREB1* |
| ENST00000494983 | ENST00000353267 | *CREB1* |
| ENST00000494983 | ENST00000374397 | *CREB1* |
| ENST00000564551 | ENST00000565282 | *NPTN* |
| ENST00000564551 | ENST00000562924 | *NPTN* |
| ENST00000564551 | ENST00000542234 | *NPTN* |
| ENST00000564551 | ENST00000545878 | *NPTN* |
| ENST00000564551 | ENST00000345330 | *NPTN* |
| ENST00000564551 | ENST00000567198 | *NPTN* |
| ENST00000564551 | ENST00000287226 | *NPTN* |
| ENST00000564551 | ENST00000565325 | *NPTN* |
| ENST00000564551 | ENST00000351217 | *NPTN* |
| ENST00000564551 | ENST00000563691 | *NPTN* |
| ENST00000409739 | ENST00000391993 | *TRAF3IP1* |
| ENST00000409739 | ENST00000373327 | *TRAF3IP1* |
| ENST00000409739 | ENST00000391994 | *TRAF3IP1* |
| NONHSAT009852 | ENST00000304786 | *SRP9* |
| NONHSAT009852 | ENST00000366839 | *SRP9* |
| NONHSAT009852 | ENST00000366838 | *SRP9* |
| ENST00000459683 | ENST00000245680 | *SLC35F5* |
| ENST00000459683 | ENST00000447673 | *SLC35F5* |
| ENST00000495034 | ENST00000367634 | *RALGPS2* |
| ENST00000495034 | ENST00000415888 | *RALGPS2* |
| ENST00000495034 | ENST00000324778 | *RALGPS2* |
| ENST00000495034 | ENST00000367635 | *RALGPS2* |
| ENST00000553479 | ENST00000553362 | *C14ORF166* |
| ENST00000553479 | ENST00000261700 | *C14ORF166* |
| ENST00000553479 | ENST00000556760 | *C14ORF166* |
| ENST00000564256 | ENST00000359210 | *POLR3E* |
| ENST00000564256 | ENST00000564209 | *POLR3E* |
| ENST00000564256 | ENST00000565358 | *POLR3E* |
| ENST00000564256 | ENST00000418581 | *POLR3E* |
| ENST00000564256 | ENST00000299853 | *POLR3E* |
| ENST00000564256 | ENST00000563024 | *POLR3E* |
| ENST00000564256 | ENST00000564883 | *POLR3E* |
| ENST00000472519 | ENST00000418807 | *NAGK* |
| ENST00000472519 | ENST00000443872 | *NAGK* |
| ENST00000472519 | ENST00000531934 | *NAGK* |
| ENST00000472519 | ENST00000524537 | *NAGK* |
| ENST00000472519 | ENST00000533981 | *NAGK* |
| ENST00000472519 | ENST00000455662 | *NAGK* |
| ENST00000472519 | ENST00000244204 | *NAGK* |
| ENST00000472519 | ENST00000529236 | *NAGK* |
| ENST00000472519 | ENST00000443938 | *NAGK* |
| ENST00000484163 | ENST00000394783 | *GLT8D1* |
| ENST00000484163 | ENST00000464705 | *GLT8D1* |
| ENST00000484163 | ENST00000479553 | *GLT8D1* |
| ENST00000484163 | ENST00000266014 | *GLT8D1* |
| ENST00000484163 | ENST00000497953 | *GLT8D1* |
| ENST00000484163 | ENST00000489119 | *GLT8D1* |
| ENST00000484163 | ENST00000491606 | *GLT8D1* |
| ENST00000484163 | ENST00000407584 | *GLT8D1* |
| ENST00000484163 | ENST00000487642 | *GLT8D1* |
| ENST00000484163 | ENST00000478968 | *GLT8D1* |
| ENST00000484163 | ENST00000497436 | *GLT8D1* |
| ENST00000462295 | ENST00000393857 | *C3ORF17* |
| ENST00000462295 | ENST00000383675 | *C3ORF17* |
| ENST00000462295 | ENST00000314400 | *C3ORF17* |
| ENST00000462295 | ENST00000472166 | *C3ORF17* |
| ENST00000580453 | ENST00000577485 | *FLII* |
| ENST00000580453 | ENST00000578558 | *FLII* |
| ENST00000453341 | ENST00000377782 | *TNFRSF25* |
| ENST00000453341 | ENST00000340850 | *PLEKHG5* |
| ENST00000453341 | ENST00000400913 | *PLEKHG5* |
| ENST00000453341 | ENST00000377748 | *PLEKHG5* |
| ENST00000453341 | ENST00000351748 | *TNFRSF25* |
| ENST00000453341 | ENST00000348333 | *TNFRSF25* |
| ENST00000453341 | ENST00000356876 | *TNFRSF25* |
| ENST00000453341 | ENST00000351959 | *TNFRSF25* |
| ENST00000453341 | ENST00000481401 | *TNFRSF25* |
| ENST00000392029 | ENST00000367602 | *QSOX1* |
| ENST00000392029 | ENST00000367600 | *QSOX1* |
| ENST00000454380 | ENST00000378947 | *C5ORF56* |
| ENST00000454380 | ENST00000407797 | *C5ORF56* |
| ENST00000454380 | ENST00000378953 | *C5ORF56* |
| ENST00000454380 | ENST00000337752 | *C5ORF56* |
| ENST00000589050 | ENST00000337059 | *RPRD1A* |
| ENST00000589050 | ENST00000585953 | *RPRD1A* |
| ENST00000589050 | ENST00000399022 | *RPRD1A* |
| ENST00000589050 | ENST00000319040 | *RPRD1A* |
| ENST00000589050 | ENST00000590898 | *RPRD1A* |
| ENST00000589050 | ENST00000588737 | *RPRD1A* |
| ENST00000589050 | ENST00000357384 | *RPRD1A* |
| ENST00000564630 | ENST00000356633 | *CCNDBP1* |
| ENST00000564630 | ENST00000300213 | *CCNDBP1* |
| ENST00000564630 | ENST00000260403 | *TMEM62* |
| NONHSAT130665 | ENST00000379883 | *DDX58* |
| NONHSAT130665 | ENST00000379882 | *DDX58* |
| NONHSAT130665 | ENST00000379868 | *DDX58* |
| NONHSAT130665 | ENST00000542096 | *DDX58* |
| ENST00000554501 | ENST00000555126 | *ALDH6A1* |
| ENST00000554501 | ENST00000553458 | *ALDH6A1* |
| ENST00000554501 | ENST00000350259 | *ALDH6A1* |
| ENST00000593262 | ENST00000586277 | *RPL27* |
| ENST00000593262 | ENST00000589037 | *RPL27* |
| ENST00000593262 | ENST00000590864 | *RPL27* |
| ENST00000593262 | ENST00000253788 | *RPL27* |
| ENST00000593262 | ENST00000589913 | *RPL27* |
| NR_034121 | ENST00000254037 | *ZCCHC9* |
| NR_034121 | ENST00000407610 | *ZCCHC9* |
| NR_034121 | ENST00000438268 | *ZCCHC9* |
| NR_034121 | ENST00000380199 | *ZCCHC9* |
| ENST00000518900 | ENST00000520667 | *FAM114A2* |
| ENST00000518900 | ENST00000351797 | *FAM114A2* |
| ENST00000518900 | ENST00000520313 | *FAM114A2* |
| ENST00000518900 | ENST00000517605 | *FAM114A2* |
| ENST00000518900 | ENST00000519808 | *FAM114A2* |
| ENST00000518900 | ENST00000523705 | *FAM114A2* |
| ENST00000518900 | ENST00000522858 | *FAM114A2* |
| ENST00000518900 | ENST00000524246 | *FAM114A2* |
| ENST00000518900 | ENST00000518102 | *FAM114A2* |
| ENST00000518900 | ENST00000522395 | *FAM114A2* |
| ENST00000518900 | ENST00000522634 | *FAM114A2* |
| ENST00000520322 | ENST00000521416 | *LCP2* |
| ENST00000520322 | ENST00000046794 | *LCP2* |
| ENST00000496007 | ENST00000400809 | *CCNL2* |
| ENST00000496007 | ENST00000408952 | *CCNL2* |
| ENST00000496007 | ENST00000408918 | *CCNL2* |
| ENST00000496007 | ENST00000497013 | *CCNL2* |
| ENST00000495037 | ENST00000273261 | *LRIG1* |
| ENST00000495037 | ENST00000383703 | *LRIG1* |
| ENST00000524481 | ENST00000532331 | *PTPRK* |
| ENST00000524481 | ENST00000415055 | *PTPRK* |
| ENST00000524481 | ENST00000368207 | *PTPRK* |
| ENST00000524481 | ENST00000525459 | *PTPRK* |
| ENST00000524481 | ENST00000415046 | *PTPRK* |
| ENST00000524481 | ENST00000368227 | *PTPRK* |
| ENST00000524481 | ENST00000368215 | *PTPRK* |
| ENST00000524481 | ENST00000490332 | *PTPRK* |
| ENST00000524481 | ENST00000368210 | *PTPRK* |
| ENST00000524481 | ENST00000368226 | *PTPRK* |
| ENST00000524481 | ENST00000368213 | *PTPRK* |
| ENST00000409076 | ENST00000409604 | *SNX13* |
| ENST00000409076 | ENST00000409389 | *SNX13* |
| ENST00000409076 | ENST00000428135 | *SNX13* |
| ENST00000525507 | ENST00000012443 | *PPP5C* |
| ENST00000525507 | ENST00000391919 | *PPP5C* |
| ENST00000493723 | ENST00000342947 | *DFNA5* |
| ENST00000493723 | ENST00000414428 | *DFNA5* |
| ENST00000493723 | ENST00000415480 | *DFNA5* |
| ENST00000493723 | ENST00000545231 | *DFNA5* |
| ENST00000493723 | ENST00000419307 | *DFNA5* |
| ENST00000493723 | ENST00000446822 | *DFNA5* |
| ENST00000493723 | ENST00000409970 | *DFNA5* |
| ENST00000493723 | ENST00000409775 | *DFNA5* |
| ENST00000479285 | ENST00000369569 | *AP4B1* |
| ENST00000479285 | ENST00000256658 | *AP4B1* |
| ENST00000479285 | ENST00000369567 | *AP4B1* |
| ENST00000479285 | ENST00000369571 | *AP4B1* |
| ENST00000479285 | ENST00000369566 | *AP4B1* |
| ENST00000479285 | ENST00000369564 | *AP4B1* |
| ENST00000479285 | ENST00000432415 | *AP4B1* |
| ENST00000428730 | ENST00000454039 | *RHBDF1* |
| ENST00000428730 | ENST00000448893 | *RHBDF1* |
| ENST00000428730 | ENST00000262316 | *RHBDF1* |
| ENST00000428730 | ENST00000450643 | *RHBDF1* |
| ENST00000428730 | ENST00000419764 | *RHBDF1* |
| ENST00000494132 | ENST00000396411 | *ATG4B* |
| ENST00000494132 | ENST00000405546 | *ATG4B* |
| ENST00000494132 | ENST00000428861 | *ATG4B* |
| ENST00000494132 | ENST00000402096 | *ATG4B* |
| ENST00000494132 | ENST00000404914 | *ATG4B* |
| ENST00000494132 | ENST00000474739 | *ATG4B* |
| NONHSAT023112 | ENST00000524558 | *SERPINH1* |
| NONHSAT023112 | ENST00000525876 | *SERPINH1* |
| NONHSAT023112 | ENST00000533603 | *SERPINH1* |
| NONHSAT023112 | ENST00000358171 | *SERPINH1* |
| NONHSAT096165 | ENST00000513024 | *LIMCH1* |
| NONHSAT096165 | ENST00000514096 | *LIMCH1* |
| NONHSAT096165 | ENST00000381753 | *LIMCH1* |
| NONHSAT096165 | ENST00000512946 | *LIMCH1* |
| NONHSAT096165 | ENST00000512820 | *LIMCH1* |
| NONHSAT096165 | ENST00000508501 | *LIMCH1* |
| NONHSAT096165 | ENST00000511496 | *LIMCH1* |
| NONHSAT096165 | ENST00000512632 | *LIMCH1* |
| NONHSAT096165 | ENST00000396595 | *LIMCH1* |
| ENST00000472514 | ENST00000330909 | *MAGI1* |
| ENST00000472514 | ENST00000497477 | *MAGI1* |
| ENST00000472514 | ENST00000483466 | *MAGI1* |
| ENST00000472514 | ENST00000402939 | *MAGI1* |
| ENST00000344780 | ENST00000372541 | *SNX21* |
| ENST00000344780 | ENST00000462307 | *SNX21* |
| ENST00000344780 | ENST00000342644 | *SNX21* |
| ENST00000344780 | ENST00000491381 | *SNX21* |
| ENST00000344780 | ENST00000372542 | *SNX21* |
| ENST00000493220 | ENST00000356175 | *NF1* |
| ENST00000493220 | ENST00000358273 | *NF1* |
| ENST00000493220 | ENST00000456735 | *NF1* |
| ENST00000493835 | ENST00000542815 | *ZEB1* |
| ENST00000595516 | ENST00000599366 | *PIH1D1* |
| ENST00000595516 | ENST00000595550 | *PIH1D1* |
| ENST00000595516 | ENST00000600875 | *PIH1D1* |
| ENST00000595516 | ENST00000262265 | *PIH1D1* |
| ENST00000595516 | ENST00000597415 | *PIH1D1* |
| ENST00000595516 | ENST00000601825 | *PIH1D1* |
| ENST00000595516 | ENST00000601807 | *PIH1D1* |
| ENST00000595516 | ENST00000596049 | *PIH1D1* |
| ENST00000411549 | ENST00000333167 | *ACAA1* |
| ENST00000411549 | ENST00000450296 | *ACAA1* |
| ENST00000411549 | ENST00000452171 | *ACAA1* |
| ENST00000411549 | ENST00000544624 | *ACAA1* |
| ENST00000411549 | ENST00000301810 | *ACAA1* |
| ENST00000411549 | ENST00000421218 | *ACAA1* |
| ENST00000411549 | ENST00000444607 | *ACAA1* |
| ENST00000548127 | ENST00000452082 | *NEK3* |
| ENST00000548127 | ENST00000400357 | *NEK3* |
| ENST00000548127 | ENST00000378101 | *NEK3* |
| ENST00000548127 | ENST00000339406 | *NEK3* |
| ENST00000548127 | ENST00000550841 | *NEK3* |
| ENST00000550704 | ENST00000420463 | *EIF4B* |
| ENST00000550704 | ENST00000549481 | *EIF4B* |
| ENST00000550704 | ENST00000416762 | *EIF4B* |
| ENST00000550704 | ENST00000262056 | *EIF4B* |
| ENST00000550704 | ENST00000551002 | *EIF4B* |
| ENST00000550704 | ENST00000552490 | *EIF4B* |
| ENST00000461556 | ENST00000392531 | *CRIP1* |
| ENST00000461556 | ENST00000409393 | *CRIP1* |
| ENST00000461556 | ENST00000330233 | *CRIP1* |
| ENST00000484164 | ENST00000367663 | *REPS1* |
| ENST00000484164 | ENST00000526022 | *REPS1* |
| ENST00000484164 | ENST00000258062 | *REPS1* |
| ENST00000484164 | ENST00000478483 | *REPS1* |
| ENST00000484164 | ENST00000530255 | *REPS1* |
| ENST00000484164 | ENST00000409812 | *REPS1* |
| ENST00000484164 | ENST00000450536 | *REPS1* |
| ENST00000484164 | ENST00000415951 | *REPS1* |
| ENST00000484164 | ENST00000529597 | *REPS1* |
| ENST00000484880 | ENST00000370995 | *SERBP1* |
| ENST00000484880 | ENST00000361219 | *SERBP1* |
| ENST00000484880 | ENST00000370990 | *SERBP1* |
| ENST00000484880 | ENST00000370994 | *SERBP1* |
| UCSC_TCONS_00026507 | ENST00000426838 | *SETBP1* |
| ENST00000549375 | ENST00000548710 | *SPATS2* |
| ENST00000549375 | ENST00000549538 | *SPATS2* |
| ENST00000549375 | ENST00000549298 | *SPATS2* |
| ENST00000549375 | ENST00000321898 | *SPATS2* |
| ENST00000549375 | ENST00000550997 | *SPATS2* |
| ENST00000549375 | ENST00000551540 | *SPATS2* |
| ENST00000549375 | ENST00000552171 | *SPATS2* |
| ENST00000549375 | ENST00000548377 | *SPATS2* |
| ENST00000549375 | ENST00000553127 | *SPATS2* |
| ENST00000549375 | ENST00000550643 | *SPATS2* |
| ENST00000549375 | ENST00000552918 | *SPATS2* |
| ENST00000549375 | ENST00000548654 | *SPATS2* |
| ENST00000549375 | ENST00000549179 | *SPATS2* |
| ENST00000549375 | ENST00000547865 | *SPATS2* |
| ENST00000549375 | ENST00000548777 | *SPATS2* |
| ENST00000497987 | ENST00000413040 | *NUB1* |
| ENST00000497987 | ENST00000480714 | *NUB1* |
| ENST00000497987 | ENST00000355851 | *NUB1* |
| ENST00000497987 | ENST00000460712 | *NUB1* |
| ENST00000497987 | ENST00000483358 | *NUB1* |
| ENST00000497987 | ENST00000568733 | *NUB1* |
| ENST00000497987 | ENST00000566856 | *NUB1* |
| NR_049759 | ENST00000526811 | *IFITM3* |
| NR_049759 | ENST00000399808 | *IFITM3* |
| NR_049759 | ENST00000602735 | *IFITM3* |
| ENST00000497557 | ENST00000245046 | *EMC3* |
| ENST00000497557 | ENST00000470827 | *EMC3* |
| ENST00000497557 | ENST00000429759 | *EMC3* |
| ENST00000520747 | ENST00000435817 | *FCHSD1* |
| ENST00000520747 | ENST00000522126 | *FCHSD1* |
| ENST00000520747 | ENST00000522783 | *FCHSD1* |
| ENST00000587251 | ENST00000589906 | *LGALS3BP* |
| ENST00000587251 | ENST00000591274 | *LGALS3BP* |
| ENST00000587251 | ENST00000589775 | *LGALS3BP* |
| ENST00000587251 | ENST00000591778 | *LGALS3BP* |
| ENST00000587251 | ENST00000262776 | *LGALS3BP* |
| ENST00000587251 | ENST00000585407 | *LGALS3BP* |
| ENST00000587251 | ENST00000589527 | *LGALS3BP* |
| ENST00000458594 | ENST00000431535 | *ASCC2* |
| ENST00000458594 | ENST00000412689 | *ASCC2* |
| ENST00000458594 | ENST00000411532 | *ASCC2* |
| ENST00000458594 | ENST00000542393 | *ASCC2* |
| ENST00000458594 | ENST00000307790 | *ASCC2* |
| ENST00000458594 | ENST00000397771 | *ASCC2* |
| ENST00000509598 | ENST00000500945 | *ATG12* |
| ENST00000509598 | ENST00000509910 | *ATG12* |
| ENST00000509598 | ENST00000274459 | *ATG12* |
| ENST00000569380 | ENST00000566339 | *SPSB3* |
| ENST00000569380 | ENST00000569769 | *SPSB3* |
| ENST00000569380 | ENST00000301717 | *SPSB3* |
| UCSC_TCONS_l2_00030281 | ENST00000423738 | *ARMCX4* |
| ENST00000544500 | ENST00000377543 | *METTL3* |
| ENST00000544500 | ENST00000298717 | *METTL3* |
| ENST00000544500 | ENST00000538267 | *METTL3* |
| ENST00000503611 | ENST00000511038 | *TMEM144* |
| ENST00000503611 | ENST00000505189 | *TMEM144* |
| ENST00000503611 | ENST00000505049 | *TMEM144* |
| ENST00000534987 | ENST00000541719 | *NUMA1* |
| ENST00000534987 | ENST00000351960 | *NUMA1* |
| ENST00000534987 | ENST00000535087 | *NUMA1* |
| ENST00000534987 | ENST00000543937 | *NUMA1* |
| ENST00000534987 | ENST00000358965 | *NUMA1* |
| ENST00000534987 | ENST00000541641 | *NUMA1* |
| ENST00000534987 | ENST00000535111 | *NUMA1* |
| ENST00000534987 | ENST00000537217 | *NUMA1* |
| ENST00000534987 | ENST00000368959 | *NUMA1* |
| ENST00000534987 | ENST00000546131 | *NUMA1* |
| ENST00000534987 | ENST00000544129 | *NUMA1* |
| ENST00000534987 | ENST00000543009 | *NUMA1* |
| ENST00000534987 | ENST00000393695 | *NUMA1* |
| ENST00000534987 | ENST00000542977 | *NUMA1* |
| ENST00000534987 | ENST00000544238 | *NUMA1* |
| ENST00000534987 | ENST00000537930 | *NUMA1* |
| ENST00000534987 | ENST00000535947 | *NUMA1* |
| ENST00000534987 | ENST00000535838 | *NUMA1* |
| ENST00000534987 | ENST00000366394 | *NUMA1* |
| ENST00000502350 | ENST00000512966 | *SH3TC1* |
| ENST00000502350 | ENST00000245105 | *SH3TC1* |
| ENST00000502350 | ENST00000539824 | *SH3TC1* |
| ENST00000591645 | ENST00000592138 | *TPM4* |
| ENST00000591645 | ENST00000538887 | *TPM4* |
| ENST00000591645 | ENST00000300933 | *TPM4* |
| ENST00000591645 | ENST00000344824 | *TPM4* |
| ENST00000591645 | ENST00000588507 | *TPM4* |
| ENST00000591645 | ENST00000586833 | *TPM4* |
| ENST00000591645 | ENST00000592822 | *TPM4* |
| ENST00000434027 | ENST00000513185 | *RGMB* |
| ENST00000434027 | ENST00000308234 | *RGMB* |
| ENST00000459895 | ENST00000359759 | *COL18A1* |
| ENST00000459895 | ENST00000355480 | *COL18A1* |
| ENST00000459895 | ENST00000342220 | *COL18A1* |
| ENST00000459895 | ENST00000400337 | *COL18A1* |
| ENST00000472518 | ENST00000305557 | *RTKN* |
| ENST00000472518 | ENST00000233330 | *RTKN* |
| ENST00000472518 | ENST00000272430 | *RTKN* |
| ENST00000499583 | ENST00000380654 | *EBF1* |
| ENST00000499583 | ENST00000313708 | *EBF1* |
| ENST00000499583 | ENST00000517373 | *EBF1* |
| ENST00000503277 | ENST00000504470 | *RPL9* |
| ENST00000503277 | ENST00000503040 | *RPL9* |
| ENST00000503277 | ENST00000506581 | *RPL9* |
| ENST00000503277 | ENST00000508595 | *RPL9* |
| ENST00000503277 | ENST00000295955 | *RPL9* |
| ENST00000503277 | ENST00000449470 | *RPL9* |
| ENST00000503945 | ENST00000237380 | *MED28* |
| ENST00000453515 | ENST00000512386 | *PHF15* |
| ENST00000453515 | ENST00000361895 | *PHF15* |
| ENST00000453515 | ENST00000431355 | *PHF15* |
| ENST00000453515 | ENST00000402835 | *PHF15* |
| ENST00000453515 | ENST00000282605 | *PHF15* |
| ENST00000453515 | ENST00000395003 | *PHF15* |
| ENST00000487489 | ENST00000455106 | *FKBP10* |
| ENST00000487489 | ENST00000321562 | *FKBP10* |
| ENST00000487489 | ENST00000544340 | *FKBP10* |
| ENST00000382757 | ENST00000397462 | *UNKL* |
| ENST00000382757 | ENST00000389221 | *UNKL* |
| ENST00000382757 | ENST00000301712 | *UNKL* |
| ENST00000382757 | ENST00000508903 | *UNKL* |
| ENST00000368677 | ENST00000368680 | *NPR1* |
| ENST00000487620 | ENST00000424697 | *ZNF3* |
| ENST00000487620 | ENST00000441298 | *ZNF3* |
| ENST00000487620 | ENST00000292393 | *ZNF3* |
| ENST00000487620 | ENST00000299667 | *ZNF3* |
| ENST00000487620 | ENST00000303915 | *ZNF3* |
| ENST00000487620 | ENST00000449785 | *ZNF3* |
| ENST00000487620 | ENST00000412947 | *ZNF3* |
| ENST00000487620 | ENST00000413658 | *ZNF3* |
| ENST00000487620 | ENST00000428683 | *ZNF3* |
| ENST00000487620 | ENST00000415068 | *ZNF3* |
| ENST00000603175 | ENST00000460508 | *LBX2* |
| ENST00000603175 | ENST00000341396 | *LBX2* |
| ENST00000556178 | ENST00000536315 | *RPS6KA5* |
| ENST00000556178 | ENST00000418736 | *RPS6KA5* |
| ENST00000556178 | ENST00000261991 | *RPS6KA5* |
| ENST00000439943 | ENST00000255174 | *OSER1* |
| ENST00000439943 | ENST00000372970 | *OSER1* |
| ENST00000522761 | ENST00000543466 | *G3BP1* |
| ENST00000522761 | ENST00000356245 | *G3BP1* |
| ENST00000522761 | ENST00000523519 | *G3BP1* |
| ENST00000522761 | ENST00000394123 | *G3BP1* |
| ENST00000522761 | ENST00000507878 | *G3BP1* |
| ENST00000522761 | ENST00000520006 | *G3BP1* |
| ENST00000522761 | ENST00000520578 | *G3BP1* |
| ENST00000545213 | ENST00000554068 | *ADCY4* |
| ENST00000545213 | ENST00000556932 | *ADCY4* |
| ENST00000545213 | ENST00000418030 | *ADCY4* |
| ENST00000545213 | ENST00000396747 | *ADCY4* |
| ENST00000545213 | ENST00000310677 | *ADCY4* |
| UCSC_TCONS_00009639 | ENST00000282516 | *NIPBL* |
| UCSC_TCONS_00009639 | ENST00000448238 | *NIPBL* |
| ENST00000578734 | ENST00000578921 | *RAB31* |
| NR_026952 | ENST00000532129 | *ALKBH3* |
| NR_026952 | ENST00000302708 | *ALKBH3* |
| NR_026952 | ENST00000529366 | *ALKBH3* |
| ENST00000570063 | ENST00000431849 | *C1ORF63* |
| ENST00000570063 | ENST00000568701 | *C1ORF63* |
| ENST00000570063 | ENST00000243189 | *C1ORF63* |
| ENST00000570063 | ENST00000417642 | *C1ORF63* |
| ENST00000500563 | ENST00000320848 | *MRFAP1L1* |
| NONHSAT086846 | ENST00000498234 | *ADSL* |
| NONHSAT086846 | ENST00000216194 | *ADSL* |
| NONHSAT086846 | ENST00000342312 | *ADSL* |
| NONHSAT086846 | ENST00000454266 | *ADSL* |
| ENST00000492887 | ENST00000356657 | *FDPS* |
| ENST00000492887 | ENST00000447866 | *FDPS* |
| ENST00000492887 | ENST00000368356 | *FDPS* |
| ENST00000603108 | ENST00000263440 | *ALG6* |
| ENST00000603108 | ENST00000371108 | *ALG6* |
| lnc-RP11-712L6.5.1-2:1 | ENST00000227495 | *ST3GAL4* |
| lnc-RP11-712L6.5.1-2:1 | ENST00000534083 | *ST3GAL4* |
| lnc-RP11-712L6.5.1-2:1 | ENST00000444328 | *ST3GAL4* |
| lnc-RP11-712L6.5.1-2:1 | ENST00000356132 | *ST3GAL4* |
| lnc-RP11-712L6.5.1-2:1 | ENST00000530591 | *ST3GAL4* |
| ENST00000497410 | ENST00000483173 | *BRD9* |
| ENST00000497410 | ENST00000323510 | *BRD9* |
| ENST00000497410 | ENST00000388890 | *BRD9* |
| ENST00000497410 | ENST00000467963 | *BRD9* |
| NR_103792 | ENST00000404753 | *CAPN10* |
| NR_103792 | ENST00000352879 | *CAPN10* |
| NR_103792 | ENST00000391982 | *CAPN10* |
| NR_103792 | ENST00000354082 | *CAPN10* |
| NR_103792 | ENST00000270364 | *CAPN10* |
| NR_103792 | ENST00000391984 | *CAPN10* |
| NR_028104 | ENST00000475733 | *DCAF8* |
| NR_028104 | ENST00000407642 | *DCAF8* |
| NR_028104 | ENST00000419626 | *DCAF8* |
| NR_028104 | ENST00000473382 | *DCAF8* |
| NR_028104 | ENST00000326837 | *DCAF8* |
| NR_028104 | ENST00000440682 | *DCAF8* |
| NR_028104 | ENST00000495887 | *DCAF8* |
| NR_028104 | ENST00000610139 | *DCAF8* |
| NR_028104 | ENST00000368074 | *DCAF8* |
| NR_028104 | ENST00000608310 | *DCAF8* |
| NR_028104 | ENST00000556710 | *DCAF8* |
| NR_028104 | ENST00000447377 | *DCAF8* |
| NR_028104 | ENST00000368073 | *DCAF8* |
| NR_028104 | ENST00000477163 | *DCAF8* |
| NR_028104 | ENST00000485079 | *DCAF8* |
| ENST00000474983 | ENST00000410107 | *GCNT2* |
| ENST00000490807 | ENST00000366627 | *NTPCR* |
| ENST00000490807 | ENST00000366628 | *NTPCR* |
| ENST00000468484 | ENST00000371620 | *C9ORF142* |
| ENST00000476750 | ENST00000347147 | *TMEM44* |
| ENST00000476750 | ENST00000273580 | *TMEM44* |
| ENST00000476750 | ENST00000452358 | *TMEM44* |
| ENST00000476750 | ENST00000429560 | *TMEM44* |
| ENST00000476750 | ENST00000432352 | *TMEM44* |
| ENST00000476750 | ENST00000392432 | *TMEM44* |
| ENST00000476750 | ENST00000381975 | *TMEM44* |
| ENST00000476750 | ENST00000473092 | *TMEM44* |
| NR_049780 | ENST00000597582 | *ZNF837* |
| NR_049780 | ENST00000427624 | *ZNF837* |
| ENST00000506367 | ENST00000237596 | *PKD2* |
| ENST00000506367 | ENST00000508588 | *PKD2* |
| ENST00000493642 | ENST00000392925 | *CASP2* |
| ENST00000493642 | ENST00000310447 | *CASP2* |
| ENST00000600358 | ENST00000597021 | *STRN4* |
| ENST00000600358 | ENST00000594287 | *STRN4* |
| ENST00000600358 | ENST00000391910 | *STRN4* |
| ENST00000600358 | ENST00000539396 | *STRN4* |
| ENST00000600358 | ENST00000263280 | *STRN4* |
| ENST00000600358 | ENST00000597063 | *STRN4* |
| ENST00000600358 | ENST00000596012 | *STRN4* |
| ENST00000600358 | ENST00000593979 | *STRN4* |
| ENST00000431614 | ENST00000294952 | *PPP1R21* |
| ENST00000431614 | ENST00000421486 | *PPP1R21* |
| ENST00000431614 | ENST00000281394 | *PPP1R21* |
| ENST00000431614 | ENST00000449090 | *PPP1R21* |
| NONHSAT028805 | ENST00000549318 | *RP11-977G19.10* |
| NONHSAT028805 | ENST00000548360 | *RP11-977G19.10* |
| NONHSAT028805 | ENST00000547423 | *RP11-977G19.10* |
| ENST00000553324 | ENST00000557487 | *SHMT2* |
| ENST00000553324 | ENST00000555773 | *SHMT2* |
| ENST00000553324 | ENST00000553529 | *SHMT2* |
| ENST00000553324 | ENST00000554310 | *SHMT2* |
| ENST00000553324 | ENST00000556689 | *SHMT2* |
| ENST00000553324 | ENST00000557427 | *SHMT2* |
| ENST00000553324 | ENST00000393827 | *SHMT2* |
| ENST00000553324 | ENST00000554975 | *SHMT2* |
| ENST00000553324 | ENST00000557703 | *SHMT2* |
| ENST00000553324 | ENST00000556737 | *SHMT2* |
| ENST00000553324 | ENST00000553474 | *SHMT2* |
| ENST00000553324 | ENST00000449049 | *SHMT2* |
| ENST00000553324 | ENST00000328923 | *SHMT2* |
| ENST00000553324 | ENST00000414700 | *SHMT2* |
| ENST00000553324 | ENST00000555634 | *SHMT2* |
| ENST00000559664 | ENST00000559236 | *SLC12A6* |
| ENST00000559664 | ENST00000458406 | *SLC12A6* |
| ENST00000559664 | ENST00000558589 | *SLC12A6* |
| ENST00000559664 | ENST00000397702 | *SLC12A6* |
| ENST00000559664 | ENST00000561120 | *SLC12A6* |
| ENST00000559664 | ENST00000290209 | *SLC12A6* |
| ENST00000559664 | ENST00000560164 | *SLC12A6* |
| ENST00000559664 | ENST00000560332 | *SLC12A6* |
| ENST00000559664 | ENST00000558667 | *SLC12A6* |
| ENST00000559664 | ENST00000354181 | *SLC12A6* |
| ENST00000559664 | ENST00000559484 | *SLC12A6* |
| ENST00000559664 | ENST00000451844 | *SLC12A6* |
| ENST00000559664 | ENST00000560611 | *SLC12A6* |
| ENST00000559664 | ENST00000397707 | *SLC12A6* |
| NONHSAT075702 | ENST00000392524 | *HNRNPA3* |
| NONHSAT075702 | ENST00000411529 | *HNRNPA3* |
| NONHSAT075702 | ENST00000432457 | *HNRNPA3* |
| NONHSAT075702 | ENST00000435711 | *HNRNPA3* |
| ENST00000483281 | ENST00000374680 | *RXRB* |
| ENST00000483281 | ENST00000544186 | *RXRB* |
| ENST00000483281 | ENST00000374685 | *RXRB* |
| ENST00000483281 | ENST00000413614 | *RXRB* |
| ENST00000554638 | ENST00000378842 | *GALT* |
| ENST00000554638 | ENST00000450095 | *GALT* |
| ENST00000554638 | ENST00000556278 | *GALT* |
| ENST00000474181 | ENST00000292211 | *UBE2Q1* |
| ENST00000530222 | ENST00000534348 | *NEDD8-MDP1* |
| ENST00000530222 | ENST00000396833 | *MDP1* |
| ENST00000530222 | ENST00000288087 | *MDP1* |
| ENST00000465873 | ENST00000371756 | *UBAC1* |
| ENST00000478063 | ENST00000368301 | *LMNA* |
| ENST00000478063 | ENST00000361308 | *LMNA* |
| ENST00000478063 | ENST00000368299 | *LMNA* |
| ENST00000478063 | ENST00000368300 | *LMNA* |
| ENST00000478063 | ENST00000347559 | *LMNA* |
| ENST00000512116 | ENST00000339154 | *NUDT6* |
| ENST00000512116 | ENST00000510735 | *NUDT6* |
| ENST00000512116 | ENST00000304430 | *NUDT6* |
| ENST00000512116 | ENST00000502270 | *NUDT6* |
| ENST00000574287 | ENST00000571988 | *RSL1D1* |
| ENST00000574287 | ENST00000571133 | *RSL1D1* |
| ENST00000574287 | ENST00000573251 | *RSL1D1* |
| ENST00000574287 | ENST00000573791 | *RSL1D1* |
| ENST00000574287 | ENST00000542106 | *RSL1D1* |
| ENST00000574287 | ENST00000355674 | *RSL1D1* |
| ENST00000461511 | ENST00000352241 | *MITF* |
| ENST00000461511 | ENST00000448226 | *MITF* |
| ENST00000544867 | ENST00000432670 | *NOL8* |
| ENST00000544867 | ENST00000421075 | *NOL8* |
| ENST00000544867 | ENST00000433029 | *NOL8* |
| ENST00000544867 | ENST00000411621 | *NOL8* |
| ENST00000544867 | ENST00000536624 | *NOL8* |
| ENST00000544867 | ENST00000542613 | *NOL8* |
| ENST00000544867 | ENST00000545558 | *NOL8* |
| ENST00000544867 | ENST00000542053 | *NOL8* |
| ENST00000544867 | ENST00000442668 | *NOL8* |
| ENST00000544867 | ENST00000535387 | *NOL8* |
| ENST00000544867 | ENST00000358855 | *NOL8* |
| ENST00000544867 | ENST00000535807 | *NOL8* |
| ENST00000556254 | ENST00000557278 | *PPP2R3C* |
| ENST00000556254 | ENST00000555644 | *PPP2R3C* |
| ENST00000556254 | ENST00000554361 | *PPP2R3C* |
| ENST00000556254 | ENST00000555614 | *PPP2R3C* |
| ENST00000556254 | ENST00000261475 | *PPP2R3C* |
| NONHSAT097037 | ENST00000237654 | *CCNI* |
| NONHSAT097037 | ENST00000515468 | *CCNI* |
| NONHSAT097037 | ENST00000537948 | *CCNI* |
| ENST00000572330 | ENST00000347992 | *MINK1* |
| ENST00000572330 | ENST00000576037 | *MINK1* |
| ENST00000572330 | ENST00000453408 | *MINK1* |
| ENST00000572330 | ENST00000355280 | *MINK1* |
| ENST00000505306 | ENST00000320031 | *ITGA3* |
| ENST00000505306 | ENST00000506827 | *ITGA3* |
| ENST00000505306 | ENST00000512553 | *ITGA3* |
| ENST00000505306 | ENST00000544892 | *ITGA3* |
| ENST00000505306 | ENST00000007722 | *ITGA3* |
| ENST00000482197 | ENST00000294383 | *USP24* |
| ENST00000482197 | ENST00000407756 | *USP24* |
| ENST00000484879 | ENST00000267163 | *RB1* |
| ENST00000562282 | ENST00000267731 | *GOLGA8B* |
| ENST00000562282 | ENST00000543376 | *GOLGA8A* |
| ENST00000571436 | ENST00000573183 | *ZZEF1* |
| ENST00000571436 | ENST00000381638 | *ZZEF1* |
| NONHSAT076204 | ENST00000424317 | *ANKRD44* |
| ENST00000553915 | ENST00000538452 | *PRMT5* |
| ENST00000553915 | ENST00000556043 | *PRMT5* |
| ENST00000553915 | ENST00000397441 | *PRMT5* |
| ENST00000553915 | ENST00000324366 | *PRMT5* |
| ENST00000553915 | ENST00000554867 | *PRMT5* |
| ENST00000553915 | ENST00000553897 | *PRMT5* |
| ENST00000553915 | ENST00000397440 | *PRMT5* |
| ENST00000553915 | ENST00000557443 | *PRMT5* |
| ENST00000553915 | ENST00000555530 | *PRMT5* |
| ENST00000553915 | ENST00000556616 | *PRMT5* |
| ENST00000553915 | ENST00000454731 | *PRMT5* |
| ENST00000553915 | ENST00000421938 | *PRMT5* |
| ENST00000553915 | ENST00000553502 | *PRMT5* |
| ENST00000553915 | ENST00000553550 | *PRMT5* |
| ENST00000553915 | ENST00000554910 | *PRMT5* |
| ENST00000553915 | ENST00000555454 | *PRMT5* |
| ENST00000553915 | ENST00000216350 | *PRMT5* |
| ENST00000514469 | ENST00000503427 | *HMGXB3* |
| ENST00000514469 | ENST00000502717 | *HMGXB3* |
| ENST00000594266 | ENST00000601032 | *LTBP4* |
| ENST00000594266 | ENST00000396819 | *LTBP4* |
| ENST00000594266 | ENST00000243562 | *LTBP4* |
| ENST00000594266 | ENST00000599724 | *LTBP4* |
| ENST00000594266 | ENST00000593463 | *LTBP4* |
| ENST00000594266 | ENST00000597071 | *LTBP4* |
| ENST00000594266 | ENST00000204005 | *LTBP4* |
| ENST00000594266 | ENST00000308370 | *LTBP4* |
| ENST00000594266 | ENST00000545697 | *LTBP4* |
| ENST00000563868 | ENST00000356010 | *MAPK8IP3* |
| ENST00000563868 | ENST00000250894 | *MAPK8IP3* |
| ENST00000560998 | ENST00000399409 | *RABGGTA* |
| ENST00000560998 | ENST00000216840 | *RABGGTA* |
| ENST00000560998 | ENST00000560521 | *RABGGTA* |
| ENST00000560998 | ENST00000560777 | *RABGGTA* |
| ENST00000490206 | ENST00000457358 | *GNAI1* |
| ENST00000490206 | ENST00000351004 | *GNAI1* |
| ENST00000490206 | ENST00000442586 | *GNAI1* |
| ENST00000490206 | ENST00000418742 | *GNAI1* |
| ENST00000490206 | ENST00000447650 | *GNAI1* |
| ENST00000559737 | ENST00000380324 | *USP3* |
| ENST00000559737 | ENST00000558285 | *USP3* |
| ENST00000559737 | ENST00000559711 | *USP3* |
| ENST00000559737 | ENST00000539772 | *USP3* |
| ENST00000559737 | ENST00000540797 | *USP3* |
| ENST00000559737 | ENST00000268049 | *USP3* |
| ENST00000521784 | ENST00000519640 | *PLEKHA2* |
| ENST00000521784 | ENST00000521746 | *PLEKHA2* |
| ENST00000521784 | ENST00000420274 | *PLEKHA2* |
| ENST00000483434 | ENST00000358029 | *STX16* |
| ENST00000483434 | ENST00000359617 | *STX16* |
| ENST00000483434 | ENST00000458280 | *STX16* |
| ENST00000483434 | ENST00000361830 | *STX16* |
| ENST00000483434 | ENST00000312283 | *STX16* |
| ENST00000483434 | ENST00000371141 | *STX16* |
| ENST00000483434 | ENST00000361770 | *STX16* |
| ENST00000483434 | ENST00000438253 | *STX16* |
| ENST00000483434 | ENST00000371132 | *STX16* |
| ENST00000483434 | ENST00000355957 | *STX16* |
| ENST00000483434 | ENST00000412911 | *STX16* |
| ENST00000558340 | ENST00000288111 | *DHRS1* |
| ENST00000558340 | ENST00000396813 | *DHRS1* |
| ENST00000600048 | ENST00000599369 | *MZF1* |
| ENST00000600048 | ENST00000594108 | *MZF1* |
| ENST00000600048 | ENST00000596039 | *MZF1* |
| ENST00000600048 | ENST00000215057 | *MZF1* |
| ENST00000600048 | ENST00000594234 | *MZF1* |
| ENST00000519805 | ENST00000520492 | *ZFPM2* |
| ENST00000519805 | ENST00000517361 | *ZFPM2* |
| ENST00000519805 | ENST00000407775 | *ZFPM2* |
| NONHSAT140630 | ENST00000381774 | *CPPED1* |
| NONHSAT140630 | ENST00000433677 | *CPPED1* |
| NONHSAT140630 | ENST00000261660 | *CPPED1* |
| ENST00000411772 | ENST00000467474 | *TP53BP1* |
| ENST00000411772 | ENST00000382044 | *TP53BP1* |
| ENST00000411772 | ENST00000434595 | *TP53BP1* |
| ENST00000411772 | ENST00000382039 | *TP53BP1* |
| ENST00000411772 | ENST00000450115 | *TP53BP1* |
| ENST00000411772 | ENST00000263801 | *TP53BP1* |
| ENST00000411772 | ENST00000413546 | *TP53BP1* |
| ENST00000244777 | ENST00000397457 | *BLOC1S5* |
| ENST00000244777 | ENST00000539054 | *TXNDC5* |
| ENST00000244777 | ENST00000543936 | *BLOC1S5* |
| NONHSAG001876 | ENST00000334785 | *NEXN* |
| NONHSAG001876 | ENST00000401035 | *NEXN* |
| NONHSAG001876 | ENST00000294624 | *NEXN* |
| NONHSAG001876 | ENST00000330010 | *NEXN* |
| NONHSAG001876 | ENST00000457030 | *NEXN* |
| NONHSAG001876 | ENST00000440324 | *NEXN* |
| NONHSAT094344 | ENST00000318037 | *RNF168* |
| ENST00000558611 | ENST00000335102 | *MARK3* |
| ENST00000558611 | ENST00000440884 | *MARK3* |
| ENST00000558611 | ENST00000416682 | *MARK3* |
| ENST00000558611 | ENST00000554627 | *MARK3* |
| ENST00000558611 | ENST00000303622 | *MARK3* |
| ENST00000558611 | ENST00000429436 | *MARK3* |
| ENST00000558611 | ENST00000553942 | *MARK3* |
| ENST00000558611 | ENST00000216288 | *MARK3* |
| ENST00000482343 | ENST00000361405 | *MTMR11* |
| ENST00000482343 | ENST00000369140 | *MTMR11* |
| ENST00000482343 | ENST00000439741 | *MTMR11* |
| ENST00000482343 | ENST00000406732 | *MTMR11* |
| ENST00000529917 | ENST00000527759 | *BCLAF1* |
| ENST00000529917 | ENST00000031135 | *BCLAF1* |
| ENST00000529917 | ENST00000527536 | *BCLAF1* |
| ENST00000529917 | ENST00000353331 | *BCLAF1* |
| ENST00000529917 | ENST00000531224 | *BCLAF1* |
| ENST00000529917 | ENST00000530767 | *BCLAF1* |
| ENST00000529917 | ENST00000529826 | *BCLAF1* |
| ENST00000529917 | ENST00000392348 | *BCLAF1* |
| ENST00000529917 | ENST00000534762 | *BCLAF1* |
| ENST00000397193 | ENST00000451360 | *PAFAH1B1* |
| ENST00000397193 | ENST00000397195 | *PAFAH1B1* |
| ENST00000397193 | ENST00000574468 | *PAFAH1B1* |
| ENST00000472559 | ENST00000542501 | *UQCC1* |
| ENST00000472559 | ENST00000407996 | *UQCC1* |
| ENST00000472559 | ENST00000349714 | *UQCC1* |
| ENST00000472559 | ENST00000359226 | *UQCC1* |
| ENST00000472559 | ENST00000374380 | *UQCC1* |
| ENST00000472559 | ENST00000438533 | *UQCC1* |
| ENST00000472559 | ENST00000424405 | *UQCC1* |
| ENST00000472559 | ENST00000397556 | *UQCC1* |
| ENST00000472559 | ENST00000540457 | *UQCC1* |
| ENST00000472559 | ENST00000374385 | *UQCC1* |
| ENST00000472559 | ENST00000374384 | *UQCC1* |
| ENST00000472559 | ENST00000374377 | *UQCC1* |
| UCSC_TCONS_l2_00012717 | ENST00000568956 | *ZNF865* |
| NONHSAT094828 | ENST00000355443 | *MFSD10* |
| NONHSAT094828 | ENST00000507555 | *MFSD10* |
| NONHSAT094828 | ENST00000508221 | *MFSD10* |
| NONHSAT094828 | ENST00000329687 | *MFSD10* |
| ENST00000517396 | ENST00000520441 | *LYRM2* |
| ENST00000517396 | ENST00000520318 | *LYRM2* |
| ENST00000517396 | ENST00000523377 | *LYRM2* |
| ENST00000413407 | ENST00000444509 | *SENP2* |
| ENST00000413407 | ENST00000427465 | *SENP2* |
| ENST00000413407 | ENST00000430355 | *SENP2* |
| ENST00000413407 | ENST00000545472 | *SENP2* |
| ENST00000413407 | ENST00000296257 | *SENP2* |
| ENST00000582287 | ENST00000578963 | *ISYNA1* |
| ENST00000582287 | ENST00000457269 | *ISYNA1* |
| ENST00000582287 | ENST00000545187 | *ISYNA1* |
| ENST00000582287 | ENST00000317018 | *ISYNA1* |
| ENST00000582287 | ENST00000338128 | *ISYNA1* |
| ENST00000582287 | ENST00000581672 | *ISYNA1* |
| ENST00000435366 | ENST00000540582 | *EDEM2* |
| ENST00000481690 | ENST00000379019 | *GPCPD1* |
| ENST00000578357 | ENST00000360238 | *CUEDC1* |
| ENST00000578357 | ENST00000407144 | *CUEDC1* |
| ENST00000578357 | ENST00000581898 | *CUEDC1* |
| ENST00000578357 | ENST00000585294 | *CUEDC1* |
| ENST00000578357 | ENST00000577840 | *CUEDC1* |
| ENST00000578357 | ENST00000577830 | *CUEDC1* |
| ENST00000534225 | ENST00000528832 | *IL18* |
| ENST00000534225 | ENST00000524595 | *IL18* |
| ENST00000534225 | ENST00000280357 | *IL18* |
| NONHSAG033972 | ENST00000334678 | *RPS19BP1* |
| ENST00000429419 | ENST00000536417 | *PUM2* |
| ENST00000429419 | ENST00000338086 | *PUM2* |
| ENST00000429419 | ENST00000403432 | *PUM2* |
| ENST00000429419 | ENST00000424110 | *PUM2* |
| ENST00000429419 | ENST00000440577 | *PUM2* |
| ENST00000429419 | ENST00000361078 | *PUM2* |
| ENST00000429419 | ENST00000442400 | *PUM2* |
| ENST00000429419 | ENST00000319801 | *PUM2* |
| NONHSAG000546 | ENST00000264202 | *CAPZB* |
| NONHSAG000546 | ENST00000375142 | *CAPZB* |
| NONHSAG000546 | ENST00000264203 | *CAPZB* |
| NONHSAG000546 | ENST00000413711 | *CAPZB* |
| NONHSAG000546 | ENST00000401084 | *CAPZB* |
| NONHSAG000546 | ENST00000433834 | *CAPZB* |
| NONHSAG000546 | ENST00000375144 | *CAPZB* |
| ENST00000471737 | ENST00000418541 | *MTCH1* |
| ENST00000471737 | ENST00000373616 | *MTCH1* |
| ENST00000471737 | ENST00000373627 | *MTCH1* |
| ENST00000471737 | ENST00000538808 | *MTCH1* |
| ENST00000471737 | ENST00000460219 | *MTCH1* |
| NR_104440 | ENST00000560949 | *RNF217* |
| NR_104440 | ENST00000275184 | *RNF217* |
| NR_104440 | ENST00000521654 | *RNF217* |
| NR_104440 | ENST00000359704 | *RNF217* |
| NR_104440 | ENST00000368414 | *RNF217* |
| NR_104440 | ENST00000519799 | *RNF217* |
| ENST00000464067 | ENST00000444566 | *ESAM* |
| ENST00000464067 | ENST00000278927 | *ESAM* |
| ENST00000464067 | ENST00000435477 | *ESAM* |
| ENST00000464067 | ENST00000442070 | *ESAM* |
| ENST00000589562 | ENST00000589811 | *SLFN11* |
| ENST00000589562 | ENST00000588579 | *SLFN11* |
| ENST00000589562 | ENST00000427966 | *SLFN11* |
| ENST00000589562 | ENST00000394566 | *SLFN11* |
| ENST00000589562 | ENST00000430814 | *SLFN11* |
| ENST00000589562 | ENST00000591682 | *SLFN11* |
| ENST00000589562 | ENST00000441608 | *SLFN11* |
| ENST00000589562 | ENST00000308377 | *SLFN11* |
| ENST00000589562 | ENST00000592122 | *SLFN11* |
| ENST00000510997 | ENST00000258947 | *CALCOCO2* |
| ENST00000584850 | ENST00000583419 | *STARD3* |
| ENST00000584850 | ENST00000394250 | *STARD3* |
| ENST00000584850 | ENST00000544210 | *STARD3* |
| ENST00000584850 | ENST00000577248 | *STARD3* |
| ENST00000584850 | ENST00000336308 | *STARD3* |
| ENST00000584850 | ENST00000443521 | *STARD3* |
| ENST00000584850 | ENST00000580611 | *STARD3* |
| ENST00000528807 | ENST00000436873 | *TPP1* |
| ENST00000466252 | ENST00000372541 | *SNX21* |
| ENST00000466252 | ENST00000342644 | *SNX21* |
| ENST00000466252 | ENST00000462307 | *SNX21* |
| ENST00000466252 | ENST00000491381 | *SNX21* |
| ENST00000466252 | ENST00000372542 | *SNX21* |
| ENST00000585553 | ENST00000398322 | *ACBD4* |
| ENST00000585553 | ENST00000591859 | *ACBD4* |
| ENST00000585553 | ENST00000376955 | *ACBD4* |
| ENST00000585553 | ENST00000431281 | *ACBD4* |
| ENST00000585553 | ENST00000586346 | *ACBD4* |
| ENST00000585553 | ENST00000321854 | *ACBD4* |
| ENST00000585553 | ENST00000592162 | *ACBD4* |
| ENST00000529662 | ENST00000529534 | *SYTL2* |
| ENST00000529662 | ENST00000530351 | *SYTL2* |
| ENST00000529662 | ENST00000389958 | *SYTL2* |
| ENST00000529662 | ENST00000354566 | *SYTL2* |
| ENST00000529662 | ENST00000316356 | *SYTL2* |
| ENST00000529662 | ENST00000524452 | *SYTL2* |
| ENST00000529662 | ENST00000359152 | *SYTL2* |
| ENST00000529662 | ENST00000528231 | *SYTL2* |
| ENST00000529662 | ENST00000389960 | *SYTL2* |
| ENST00000529662 | ENST00000525423 | *SYTL2* |
| ENST00000529662 | ENST00000527794 | *SYTL2* |
| ENST00000529662 | ENST00000525702 | *SYTL2* |
| ENST00000529662 | ENST00000533057 | *SYTL2* |
| ENST00000529662 | ENST00000533892 | *SYTL2* |
| ENST00000529662 | ENST00000527523 | *SYTL2* |
| ENST00000529662 | ENST00000529581 | *SYTL2* |
| ENST00000467277 | ENST00000541606 | *DNALI1* |
| ENST00000467277 | ENST00000296218 | *DNALI1* |
| ENST00000511615 | ENST00000510442 | *SUB1* |
| ENST00000511615 | ENST00000265073 | *SUB1* |
| ENST00000511615 | ENST00000506237 | *SUB1* |
| ENST00000511615 | ENST00000515355 | *SUB1* |
| ENST00000511615 | ENST00000512913 | *SUB1* |
| ENST00000511615 | ENST00000502897 | *SUB1* |
| ENST00000486126 | ENST00000291576 | *PWP2* |
| ENST00000486126 | ENST00000456705 | *PWP2* |
| ENST00000550872 | ENST00000397901 | *CHMP1A* |
| ENST00000550872 | ENST00000253475 | *CHMP1A* |
| ENST00000550872 | ENST00000535997 | *CHMP1A* |
| ENST00000550872 | ENST00000550102 | *CHMP1A* |
| NONHSAT048046 | ENST00000310298 | *PDE8A* |
| NONHSAT048046 | ENST00000339708 | *PDE8A* |
| NONHSAT048046 | ENST00000394553 | *PDE8A* |
| NONHSAT048046 | ENST00000557957 | *PDE8A* |
| ENST00000506610 | ENST00000422728 | *FAM200B* |
| ENST00000506610 | ENST00000503617 | *FAM200B* |
| ENST00000531648 | ENST00000543718 | *C11ORF49* |
| ENST00000531648 | ENST00000378615 | *C11ORF49* |
| ENST00000531648 | ENST00000536126 | *C11ORF49* |
| ENST00000531648 | ENST00000278460 | *C11ORF49* |
| ENST00000531648 | ENST00000378618 | *C11ORF49* |
| ENST00000531648 | ENST00000395460 | *C11ORF49* |
| ENST00000513356 | ENST00000296802 | *NSA2* |
| ENST00000513356 | ENST00000515524 | *NSA2* |
| ENST00000418937 | ENST00000537564 | *AACS* |
| ENST00000418937 | ENST00000316519 | *AACS* |
| ENST00000418937 | ENST00000537477 | *AACS* |
| ENST00000418937 | ENST00000536752 | *AACS* |
| ENST00000418937 | ENST00000316543 | *AACS* |
| ENST00000418937 | ENST00000261686 | *AACS* |
| ENST00000418937 | ENST00000441247 | *AACS* |
| ENST00000471355 | ENST00000295685 | *ARPC2* |
| ENST00000471355 | ENST00000315717 | *ARPC2* |
| ENST00000471355 | ENST00000420104 | *ARPC2* |
| ENST00000478234 | ENST00000303270 | *RAB24* |
| ENST00000478234 | ENST00000504395 | *RAB24* |
| ENST00000478234 | ENST00000303251 | *RAB24* |
| ENST00000478234 | ENST00000393611 | *RAB24* |
| ENST00000409694 | ENST00000537033 | *SYNE1* |
| ENST00000409694 | ENST00000265368 | *SYNE1* |
| ENST00000409694 | ENST00000367257 | *SYNE1* |
| ENST00000409694 | ENST00000354674 | *SYNE1* |
| ENST00000409694 | ENST00000423061 | *SYNE1* |
| ENST00000409694 | ENST00000367251 | *SYNE1* |
| ENST00000409694 | ENST00000341594 | *SYNE1* |
| ENST00000409694 | ENST00000367255 | *SYNE1* |
| ENST00000409694 | ENST00000356820 | *SYNE1* |
| ENST00000409694 | ENST00000539504 | *SYNE1* |
| ENST00000409694 | ENST00000448038 | *SYNE1* |
| ENST00000409694 | ENST00000540663 | *SYNE1* |
| ENST00000434385 | ENST00000541191 | *STK38L* |
| ENST00000434385 | ENST00000545470 | *STK38L* |
| ENST00000434385 | ENST00000543246 | *STK38L* |
| ENST00000434385 | ENST00000539577 | *STK38L* |
| ENST00000434385 | ENST00000544969 | *STK38L* |
| ENST00000434385 | ENST00000540996 | *STK38L* |
| ENST00000434385 | ENST00000389032 | *STK38L* |
| NONHSAT146451 | ENST00000575595 | *EPN2* |
| NONHSAT146451 | ENST00000395618 | *EPN2* |
| NONHSAT146451 | ENST00000494192 | *EPN2* |
| NONHSAT146451 | ENST00000314728 | *EPN2* |
| NONHSAT146451 | ENST00000577692 | *EPN2* |
| NONHSAT146451 | ENST00000581024 | *EPN2* |
| NONHSAT146451 | ENST00000583197 | *EPN2* |
| NONHSAT146451 | ENST00000395628 | *EPN2* |
| NONHSAT146451 | ENST00000395626 | *EPN2* |
| NONHSAT146451 | ENST00000347697 | *EPN2* |
| NONHSAG009780 | ENST00000264018 | *DDX6* |
| ENST00000480906 | ENST00000423531 | *ACAP2* |
| ENST00000480906 | ENST00000326793 | *ACAP2* |
| ENST00000480906 | ENST00000439758 | *ACAP2* |
| ENST00000480906 | ENST00000439666 | *ACAP2* |
| ENST00000597304 | ENST00000301475 | *ZNF558* |
| ENST00000597304 | ENST00000601372 | *ZNF558* |
| ENST00000597304 | ENST00000444186 | *ZNF558* |
| ENST00000513428 | ENST00000501272 | *ANXA5* |
| ENST00000513428 | ENST00000296511 | *ANXA5* |
| ENST00000513428 | ENST00000515017 | *ANXA5* |
| NONHSAG014051 | ENST00000403766 | *UBAC2* |
| NONHSAG014051 | ENST00000376440 | *UBAC2* |
| NONHSAG014051 | ENST00000355700 | *UBAC2* |
| NONHSAT010113 | ENST00000543760 | *GALNT2* |
| NONHSAT010113 | ENST00000541865 | *GALNT2* |
| NONHSAT010113 | ENST00000366672 | *GALNT2* |
| ENST00000461564 | ENST00000531455 | *ADAM15* |
| ENST00000461564 | ENST00000271836 | *ADAM15* |
| ENST00000461564 | ENST00000449910 | *ADAM15* |
| ENST00000461564 | ENST00000360674 | *ADAM15* |
| ENST00000461564 | ENST00000356955 | *ADAM15* |
| ENST00000461564 | ENST00000355956 | *ADAM15* |
| ENST00000461564 | ENST00000447332 | *ADAM15* |
| ENST00000461564 | ENST00000359280 | *ADAM15* |
| ENST00000461564 | ENST00000368410 | *ADAM15* |
| ENST00000461564 | ENST00000368413 | *ADAM15* |
| ENST00000461564 | ENST00000368412 | *ADAM15* |
| NONHSAT088456 | ENST00000426925 | *SH3BP5* |
| NONHSAT088456 | ENST00000383791 | *SH3BP5* |
| NONHSAT088456 | ENST00000408919 | *SH3BP5* |
| NONHSAT088456 | ENST00000253688 | *SH3BP5* |
| ENST00000487506 | ENST00000279024 | *KIAA1755* |
| ENST00000487506 | ENST00000435901 | *KIAA1755* |
| ENST00000587460 | ENST00000415183 | *MUM1* |
| ENST00000587460 | ENST00000591337 | *MUM1* |
| ENST00000587460 | ENST00000344663 | *MUM1* |
| ENST00000587460 | ENST00000592374 | *MUM1* |
| ENST00000587460 | ENST00000311401 | *MUM1* |
| ENST00000587460 | ENST00000591806 | *MUM1* |
| ENST00000461986 | ENST00000370793 | *USP33* |
| ENST00000461986 | ENST00000481579 | *USP33* |
| ENST00000461986 | ENST00000370792 | *USP33* |
| ENST00000461986 | ENST00000370794 | *USP33* |
| ENST00000461986 | ENST00000357428 | *USP33* |
| NONHSAT148017 | ENST00000538765 | *ZNF263* |
| NONHSAG050896 | ENST00000335659 | *ANKRD46* |
| NONHSAG050896 | ENST00000519597 | *ANKRD46* |
| NONHSAG050896 | ENST00000358990 | *ANKRD46* |
| NONHSAG050896 | ENST00000520552 | *ANKRD46* |
| NONHSAG050896 | ENST00000523000 | *ANKRD46* |
| ENST00000590088 | ENST00000587047 | *ZNF180* |
| ENST00000590088 | ENST00000586637 | *ZNF180* |
| ENST00000590088 | ENST00000221327 | *ZNF180* |
| ENST00000590088 | ENST00000591064 | *ZNF180* |
| ENST00000590088 | ENST00000391956 | *ZNF180* |
| ENST00000590088 | ENST00000592529 | *ZNF180* |
| ENST00000395758 | ENST00000551086 | *BICD1* |
| ENST00000395758 | ENST00000550207 | *BICD1* |
| ENST00000395758 | ENST00000547680 | *BICD1* |
| ENST00000395758 | ENST00000281474 | *BICD1* |
| ENST00000395758 | ENST00000551848 | *BICD1* |
| ENST00000395758 | ENST00000548411 | *BICD1* |
| NR_104596 | ENST00000482347 | *NTMT1* |
| NR_104596 | ENST00000372480 | *NTMT1* |
| NR_104596 | ENST00000372486 | *NTMT1* |
| NR_104596 | ENST00000372481 | *NTMT1* |
| NR_104596 | ENST00000372483 | *NTMT1* |
| NR_104596 | ENST00000459968 | *NTMT1* |
| ENST00000479791 | ENST00000332728 | *LYSMD4* |
| ENST00000479791 | ENST00000450512 | *LYSMD4* |
| ENST00000479791 | ENST00000545021 | *LYSMD4* |
| ENST00000479791 | ENST00000409796 | *LYSMD4* |
| ENST00000479791 | ENST00000344791 | *LYSMD4* |
| ENST00000562530 | ENST00000568064 | *ZNF276* |
| ENST00000562530 | ENST00000446326 | *ZNF276* |
| ENST00000562530 | ENST00000289816 | *ZNF276* |
| ENST00000562530 | ENST00000443381 | *ZNF276* |
| NONHSAT134350 | ENST00000374140 | *RGS3* |
| NONHSAT134350 | ENST00000496113 | *RGS3* |
| NONHSAT134350 | ENST00000462143 | *RGS3* |
| NONHSAT134350 | ENST00000350696 | *RGS3* |
| NONHSAT134350 | ENST00000394646 | *RGS3* |
| NONHSAT134350 | ENST00000343817 | *RGS3* |
| ENST00000393321 | ENST00000309863 | *GCC2* |
| ENST00000494018 | ENST00000441012 | *NR1H3* |
| ENST00000494018 | ENST00000405853 | *NR1H3* |
| ENST00000494018 | ENST00000395397 | *NR1H3* |
| ENST00000494018 | ENST00000405576 | *NR1H3* |
| ENST00000494018 | ENST00000527949 | *NR1H3* |
| ENST00000494018 | ENST00000467728 | *NR1H3* |
| ENST00000494018 | ENST00000481889 | *NR1H3* |
| ENST00000494018 | ENST00000407404 | *NR1H3* |
| ENST00000485784 | ENST00000389266 | *GARS* |
| ENST00000391881 | ENST00000452733 | *CYTH2* |
| ENST00000391881 | ENST00000427476 | *CYTH2* |
| ENST00000391881 | ENST00000325139 | *CYTH2* |
| ENST00000391881 | ENST00000595765 | *CYTH2* |
| ENST00000391881 | ENST00000595676 | *CTC-273B12.7* |
| ENST00000442217 | ENST00000259229 | *CCDC115* |
| ENST00000442217 | ENST00000437688 | *CCDC115* |
| ENST00000442217 | ENST00000409127 | *CCDC115* |
| ENST00000511730 | ENST00000337702 | *TTC33* |
| ENST00000490051 | ENST00000403097 | *GRB10* |
| ENST00000490051 | ENST00000439044 | *GRB10* |
| ENST00000490051 | ENST00000402497 | *GRB10* |
| ENST00000490051 | ENST00000335866 | *GRB10* |
| ENST00000477592 | ENST00000380283 | *PXDC1* |
| ENST00000477592 | ENST00000380277 | *PXDC1* |
| ENST00000583407 | ENST00000584678 | *MRPS7* |
| ENST00000583407 | ENST00000581993 | *MRPS7* |
| ENST00000583407 | ENST00000579002 | *MRPS7* |
| ENST00000583407 | ENST00000245539 | *MRPS7* |
| ENST00000583407 | ENST00000579761 | *MRPS7* |
| ENST00000504196 | ENST00000274289 | *PLK2* |
| ENST00000547994 | ENST00000440411 | *PAN2* |
| ENST00000547994 | ENST00000548043 | *PAN2* |
| ENST00000547994 | ENST00000257931 | *PAN2* |
| ENST00000547994 | ENST00000425394 | *PAN2* |
| ENST00000547994 | ENST00000547572 | *PAN2* |
| ENST00000569410 | ENST00000566304 | *HEXA* |
| ENST00000569410 | ENST00000429918 | *HEXA* |
| ENST00000569410 | ENST00000457859 | *HEXA* |
| ENST00000569410 | ENST00000567159 | *HEXA* |
| ENST00000569410 | ENST00000268097 | *HEXA* |
| ENST00000570256 | ENST00000344836 | *USP7* |
| ENST00000570256 | ENST00000535863 | *USP7* |
| ENST00000570256 | ENST00000563085 | *USP7* |
| ENST00000570256 | ENST00000381886 | *USP7* |
| ENST00000427497 | ENST00000321560 | *PLD6* |
| ENST00000427497 | ENST00000285071 | *FLCN* |
| ENST00000427497 | ENST00000461699 | *FLCN* |
| ENST00000427497 | ENST00000389169 | *FLCN* |
| ENST00000427497 | ENST00000417064 | *FLCN* |
| NONHSAG014958 | ENST00000553362 | *C14ORF166* |
| NONHSAG014958 | ENST00000261700 | *C14ORF166* |
| NONHSAG014958 | ENST00000556760 | *C14ORF166* |
| lnc-C10orf68-3:1 | ENST00000374867 | *NRP1* |
| lnc-C10orf68-3:1 | ENST00000374823 | *NRP1* |
| lnc-C10orf68-3:1 | ENST00000374822 | *NRP1* |
| lnc-C10orf68-3:1 | ENST00000374816 | *NRP1* |
| lnc-C10orf68-3:1 | ENST00000374875 | *NRP1* |
| lnc-C10orf68-3:1 | ENST00000374821 | *NRP1* |
| lnc-C10orf68-3:1 | ENST00000395995 | *NRP1* |
| lnc-C10orf68-3:1 | ENST00000432372 | *NRP1* |
| lnc-C10orf68-3:1 | ENST00000265371 | *NRP1* |
| ENST00000566699 | ENST00000397560 | *JHDM1D* |
| ENST00000566699 | ENST00000006967 | *JHDM1D* |
| ENST00000417962 | ENST00000442747 | *SHISA5* |
| ENST00000417962 | ENST00000443308 | *SHISA5* |
| ENST00000417962 | ENST00000296444 | *SHISA5* |
| ENST00000417962 | ENST00000426002 | *SHISA5* |
| ENST00000417962 | ENST00000417841 | *SHISA5* |
| ENST00000417962 | ENST00000444115 | *SHISA5* |
| ENST00000472083 | ENST00000451881 | *CUL4A* |
| ENST00000472083 | ENST00000375440 | *CUL4A* |
| ENST00000472083 | ENST00000326335 | *CUL4A* |
| ENST00000472083 | ENST00000375441 | *CUL4A* |
| NONHSAT032154 | ENST00000392321 | *ZNF605* |
| NONHSAT032154 | ENST00000360187 | *ZNF605* |
| NONHSAT032154 | ENST00000536932 | *CHFR* |
| ENST00000556396 | ENST00000555730 | *ZNF410* |
| ENST00000556396 | ENST00000556797 | *ZNF410* |
| ENST00000556396 | ENST00000554797 | *ZNF410* |
| ENST00000556396 | ENST00000554316 | *ZNF410* |
| ENST00000556396 | ENST00000334521 | *ZNF410* |
| ENST00000556396 | ENST00000442160 | *ZNF410* |
| ENST00000556396 | ENST00000324593 | *ZNF410* |
| ENST00000556396 | ENST00000556160 | *ZNF410* |
| ENST00000556396 | ENST00000555044 | *ZNF410* |
| ENST00000556396 | ENST00000557363 | *ZNF410* |
| ENST00000556396 | ENST00000556659 | *ZNF410* |
| ENST00000556396 | ENST00000557214 | *ZNF410* |
| ENST00000556396 | ENST00000557495 | *ZNF410* |
| ENST00000556396 | ENST00000556179 | *ZNF410* |
| ENST00000556396 | ENST00000540593 | *ZNF410* |
| ENST00000556396 | ENST00000555661 | *PTGR2* |
| ENST00000507024 | ENST00000508779 | *TXNDC15* |
| ENST00000507024 | ENST00000546290 | *TXNDC15* |
| ENST00000507024 | ENST00000508810 | *TXNDC15* |
| ENST00000507024 | ENST00000506916 | *TXNDC15* |
| ENST00000507024 | ENST00000358387 | *TXNDC15* |
| ENST00000507024 | ENST00000509954 | *TXNDC15* |
| ENST00000438836 | ENST00000515740 | *TMEM175* |
| ENST00000438836 | ENST00000515492 | *TMEM175* |
| ENST00000438836 | ENST00000514453 | *TMEM175* |
| ENST00000438836 | ENST00000507319 | *TMEM175* |
| ENST00000438836 | ENST00000508204 | *TMEM175* |
| ENST00000438836 | ENST00000514546 | *TMEM175* |
| ENST00000438836 | ENST00000510493 | *TMEM175* |
| ENST00000438836 | ENST00000509508 | *TMEM175* |
| ENST00000438836 | ENST00000264771 | *TMEM175* |
| ENST00000549311 | ENST00000549700 | *TENC1* |
| ENST00000549311 | ENST00000314276 | *TENC1* |
| ENST00000549311 | ENST00000552570 | *TENC1* |
| ENST00000549311 | ENST00000379902 | *TENC1* |
| ENST00000549311 | ENST00000451358 | *TENC1* |
| ENST00000549311 | ENST00000602335 | *TENC1* |
| ENST00000549311 | ENST00000546602 | *TENC1* |
| ENST00000549311 | ENST00000314250 | *TENC1* |
| ENST00000506398 | ENST00000395965 | *FAM172A* |
| ENST00000506398 | ENST00000509739 | *FAM172A* |
| ENST00000506398 | ENST00000505869 | *FAM172A* |
| ENST00000506398 | ENST00000509163 | *FAM172A* |
| ENST00000529935 | ENST00000209929 | *FMO2* |
| ENST00000529935 | ENST00000441535 | *FMO2* |
| ENST00000531690 | ENST00000530927 | *GMDS* |
| ENST00000531690 | ENST00000380815 | *GMDS* |
| ENST00000464595 | ENST00000469605 | *RPL24* |
| ENST00000464595 | ENST00000495401 | *RPL24* |
| ENST00000464595 | ENST00000394077 | *RPL24* |
| ENST00000549628 | ENST00000301464 | *IGFBP6* |
| ENST00000549628 | ENST00000548547 | *IGFBP6* |
| ENST00000555651 | ENST00000395125 | *DAAM1* |
| ENST00000555651 | ENST00000360909 | *DAAM1* |
| ENST00000555651 | ENST00000351081 | *DAAM1* |
| ENST00000552953 | ENST00000393791 | *ARHGAP9* |
| ENST00000552953 | ENST00000550130 | *ARHGAP9* |
| ENST00000552953 | ENST00000424809 | *ARHGAP9* |
| ENST00000552953 | ENST00000548139 | *ARHGAP9* |
| ENST00000552953 | ENST00000550288 | *ARHGAP9* |
| ENST00000552953 | ENST00000550399 | *ARHGAP9* |
| ENST00000552953 | ENST00000552604 | *ARHGAP9* |
| ENST00000552953 | ENST00000393797 | *ARHGAP9* |
| ENST00000552953 | ENST00000356411 | *ARHGAP9* |
| ENST00000552953 | ENST00000430041 | *ARHGAP9* |
| ENST00000466695 | ENST00000367463 | *UST* |
| ENST00000430020 | ENST00000420925 | *MTMR14* |
| ENST00000430020 | ENST00000431250 | *MTMR14* |
| ENST00000430020 | ENST00000296003 | *MTMR14* |
| ENST00000430020 | ENST00000351233 | *MTMR14* |
| ENST00000430020 | ENST00000353332 | *MTMR14* |
| NONHSAG030478 | ENST00000446558 | *RPL37A* |
| NONHSAG030478 | ENST00000598925 | *RPL37A* |
| NONHSAG030478 | ENST00000600880 | *RPL37A* |
| NONHSAG030478 | ENST00000456586 | *RPL37A* |
| NONHSAG030478 | ENST00000491306 | *RPL37A* |
| NONHSAG030478 | ENST00000427280 | *RPL37A* |
| NONHSAG030478 | ENST00000441179 | *RPL37A* |
| ENST00000542343 | ENST00000578909 | *SAP30BP* |
| ENST00000542343 | ENST00000584240 | *SAP30BP* |
| ENST00000542343 | ENST00000583063 | *SAP30BP* |
| ENST00000542343 | ENST00000355423 | *SAP30BP* |
| ENST00000542343 | ENST00000584667 | *SAP30BP* |
| ENST00000542343 | ENST00000583536 | *SAP30BP* |
| ENST00000467367 | ENST00000372008 | *MAST2* |
| ENST00000467367 | ENST00000361297 | *MAST2* |
| ENST00000467367 | ENST00000372009 | *MAST2* |
| ENST00000555740 | ENST00000554534 | *PCNXL4* |
| ENST00000555740 | ENST00000535349 | *PCNXL4* |
| ENST00000555740 | ENST00000406949 | *PCNXL4* |
| ENST00000555740 | ENST00000317623 | *PCNXL4* |
| ENST00000555740 | ENST00000404681 | *PCNXL4* |
| ENST00000555740 | ENST00000406854 | *PCNXL4* |
| ENST00000540889 | ENST00000392373 | *STX2* |
| ENST00000540889 | ENST00000261653 | *STX2* |
| ENST00000465088 | ENST00000188790 | *FAP* |
| ENST00000465088 | ENST00000443424 | *FAP* |
| ENST00000467418 | ENST00000441385 | *WDR27* |
| ENST00000467418 | ENST00000448612 | *WDR27* |
| ENST00000467418 | ENST00000423258 | *WDR27* |
| ENST00000467418 | ENST00000420344 | *WDR27* |
| ENST00000467418 | ENST00000333572 | *WDR27* |
| ENST00000496809 | ENST00000368892 | *VPS72* |
| ENST00000496809 | ENST00000354473 | *VPS72* |
| NONHSAT015462 | ENST00000371953 | *PTEN* |
| ENST00000467899 | ENST00000368678 | *FYN* |
| ENST00000467899 | ENST00000229470 | *FYN* |
| ENST00000467899 | ENST00000229471 | *FYN* |
| ENST00000467899 | ENST00000368682 | *FYN* |
| ENST00000467899 | ENST00000523238 | *FYN* |
| ENST00000467899 | ENST00000354650 | *FYN* |
| ENST00000467899 | ENST00000524310 | *FYN* |
| ENST00000467899 | ENST00000462856 | *FYN* |
| ENST00000467899 | ENST00000538466 | *FYN* |
| ENST00000467899 | ENST00000518295 | *FYN* |
| ENST00000467899 | ENST00000517419 | *FYN* |
| ENST00000467899 | ENST00000356013 | *FYN* |
| ENST00000467899 | ENST00000368667 | *FYN* |
| ENST00000467899 | ENST00000518630 | *FYN* |
| ENST00000467899 | ENST00000523574 | *FYN* |
| ENST00000467899 | ENST00000520518 | *FYN* |
| ENST00000560555 | ENST00000346623 | *ALDH1A3* |
| ENST00000560555 | ENST00000557963 | *ALDH1A3* |
| ENST00000560555 | ENST00000561338 | *ALDH1A3* |
| ENST00000560555 | ENST00000329841 | *ALDH1A3* |
| ENST00000569626 | ENST00000569914 | *C16ORF70* |
| ENST00000569626 | ENST00000219139 | *C16ORF70* |
| ENST00000569626 | ENST00000563853 | *C16ORF70* |
| ENST00000569626 | ENST00000569600 | *C16ORF70* |
| ENST00000569626 | ENST00000566026 | *C16ORF70* |
| NONHSAG003053 | ENST00000541576 | *THBS3* |
| NONHSAG003053 | ENST00000368378 | *THBS3* |
| NONHSAG003053 | ENST00000541990 | *THBS3* |
| NONHSAG003053 | ENST00000457183 | *THBS3* |
| ENST00000366441 | ENST00000411817 | *ITGA9* |
| ENST00000366441 | ENST00000264741 | *ITGA9* |
| ENST00000462386 | ENST00000451391 | *IDH1* |
| ENST00000462386 | ENST00000446179 | *IDH1* |
| ENST00000462386 | ENST00000415282 | *IDH1* |
| ENST00000462386 | ENST00000345146 | *IDH1* |
| ENST00000462386 | ENST00000415913 | *IDH1* |
| ENST00000462386 | ENST00000417583 | *IDH1* |
| ENST00000513367 | ENST00000361690 | *SRPK1* |
| ENST00000513367 | ENST00000507909 | *SRPK1* |
| ENST00000513367 | ENST00000512445 | *SRPK1* |
| ENST00000513367 | ENST00000373822 | *SRPK1* |
| ENST00000513367 | ENST00000510290 | *SRPK1* |
| ENST00000513367 | ENST00000423325 | *SRPK1* |
| ENST00000513367 | ENST00000373825 | *SRPK1* |
| NONHSAT145316 | ENST00000546760 | *C17ORF49* |
| NONHSAT145316 | ENST00000552402 | *C17ORF49* |
| NONHSAT145316 | ENST00000552321 | *RNASEK* |
| NONHSAT145316 | ENST00000402093 | *RNASEK* |
| NONHSAT145316 | ENST00000552842 | *RNASEK* |
| NONHSAT145316 | ENST00000439424 | *C17ORF49* |
| NONHSAT145316 | ENST00000570898 | *RNASEK* |
| NONHSAT145316 | ENST00000548577 | *RNASEK* |
| NONHSAT145316 | ENST00000546495 | *C17ORF49* |
| NONHSAT145316 | ENST00000547302 | *RNASEK-C17ORF49* |
| NONHSAT112988 | ENST00000576263 | *RUNX2* |
| ENST00000493039 | ENST00000452950 | *CSTF1* |
| ENST00000493039 | ENST00000415828 | *CSTF1* |
| ENST00000493039 | ENST00000428552 | *CSTF1* |
| ENST00000493039 | ENST00000217109 | *CSTF1* |
| ENST00000559031 | ENST00000560738 | *IQGAP1* |
| ENST00000559031 | ENST00000268182 | *IQGAP1* |
| ENST00000525036 | ENST00000267163 | *RB1* |
| ENST00000545466 | ENST00000535233 | *C1R* |
| ENST00000545466 | ENST00000542220 | *C1R* |
| ENST00000545466 | ENST00000540610 | *C1R* |
| ENST00000545466 | ENST00000538050 | *C1R* |
| ENST00000545466 | ENST00000543835 | *C1R* |
| ENST00000545466 | ENST00000542285 | *C1R* |
| ENST00000545466 | ENST00000541042 | *C1R* |
| ENST00000545466 | ENST00000540242 | *C1R* |
| ENST00000545466 | ENST00000536053 | *C1R* |
| UCSC_TCONS_00009942 | ENST00000507393 | *ZNF131* |
| ENST00000604822 | ENST00000603841 | *FBXW7* |
| ENST00000604822 | ENST00000296555 | *FBXW7* |
| ENST00000604822 | ENST00000263981 | *FBXW7* |
| ENST00000604822 | ENST00000281708 | *FBXW7* |
| ENST00000604822 | ENST00000603548 | *FBXW7* |
| ENST00000604822 | ENST00000393956 | *FBXW7* |
| ENST00000580482 | ENST00000581739 | *CEP112* |
| ENST00000580482 | ENST00000535342 | *CEP112* |
| ENST00000580482 | ENST00000317442 | *CEP112* |
| ENST00000580482 | ENST00000392769 | *CEP112* |
| ENST00000580482 | ENST00000537949 | *CEP112* |
| ENST00000580482 | ENST00000541355 | *CEP112* |
| ENST00000497413 | ENST00000247665 | *PHPT1* |
| ENST00000497413 | ENST00000371661 | *PHPT1* |
| ENST00000497413 | ENST00000545326 | *PHPT1* |
| ENST00000433818 | ENST00000529807 | *INTS4* |
| ENST00000433818 | ENST00000527522 | *INTS4* |
| ENST00000433818 | ENST00000534064 | *INTS4* |
| ENST00000433818 | ENST00000535943 | *INTS4* |
| ENST00000605386 | ENST00000551310 | *ATP2B1* |
| ENST00000528840 | ENST00000602725 | *PTP4A2* |
| ENST00000528840 | ENST00000344035 | *PTP4A2* |
| ENST00000528840 | ENST00000356536 | *PTP4A2* |
| ENST00000528840 | ENST00000534796 | *PTP4A2* |
| ENST00000528840 | ENST00000468531 | *PTP4A2* |
| ENST00000528840 | ENST00000457805 | *PTP4A2* |
| ENST00000557694 | ENST00000553371 | *LGMN* |
| ENST00000557694 | ENST00000554080 | *LGMN* |
| ENST00000557694 | ENST00000554397 | *LGMN* |
| ENST00000557694 | ENST00000555169 | *LGMN* |
| ENST00000557694 | ENST00000553802 | *LGMN* |
| ENST00000557694 | ENST00000334869 | *LGMN* |
| ENST00000557694 | ENST00000393218 | *LGMN* |
| ENST00000557694 | ENST00000557434 | *LGMN* |
| ENST00000557694 | ENST00000555699 | *LGMN* |
| ENST00000557694 | ENST00000553918 | *LGMN* |
| ENST00000557694 | ENST00000554919 | *LGMN* |
| ENST00000470120 | ENST00000379520 | *YPEL5* |
| ENST00000470120 | ENST00000261353 | *YPEL5* |
| ENST00000470120 | ENST00000402003 | *YPEL5* |
| ENST00000470120 | ENST00000379519 | *YPEL5* |
| ENST00000470120 | ENST00000402708 | *YPEL5* |
| ENST00000472988 | ENST00000392811 | *SMARCD3* |
| ENST00000472988 | ENST00000262188 | *SMARCD3* |
| ENST00000472988 | ENST00000356800 | *SMARCD3* |
| ENST00000472988 | ENST00000491651 | *SMARCD3* |
| ENST00000570273 | ENST00000300302 | *HERPUD1* |
| ENST00000570273 | ENST00000344114 | *HERPUD1* |
| ENST00000570273 | ENST00000439977 | *HERPUD1* |
| ENST00000570273 | ENST00000568651 | *HERPUD1* |
| ENST00000570273 | ENST00000379792 | *HERPUD1* |
| ENST00000570273 | ENST00000563343 | *HERPUD1* |
| ENST00000570273 | ENST00000569429 | *HERPUD1* |
| ENST00000570273 | ENST00000563911 | *HERPUD1* |
| ENST00000570273 | ENST00000568358 | *HERPUD1* |
| ENST00000507184 | ENST00000416524 | *IFT172* |
| ENST00000507184 | ENST00000359466 | *IFT172* |
| ENST00000507184 | ENST00000260570 | *IFT172* |
| ENST00000507184 | ENST00000443889 | *IFT172* |
| NONHSAT083936 | ENST00000401461 | *RGL4* |
| NONHSAT083936 | ENST00000290691 | *RGL4* |
| ENST00000342222 | ENST00000520835 | *IKBKB* |
| ENST00000342222 | ENST00000519735 | *IKBKB* |
| ENST00000342222 | ENST00000522147 | *IKBKB* |
| ENST00000342222 | ENST00000518983 | *IKBKB* |
| ENST00000342222 | ENST00000416505 | *IKBKB* |
| ENST00000342222 | ENST00000520810 | *IKBKB* |
| ENST00000342222 | ENST00000379708 | *IKBKB* |
| NONHSAG020542 | ENST00000576979 | *CTNS* |
| NONHSAG020542 | ENST00000414524 | *CTNS* |
| NONHSAG020542 | ENST00000574776 | *CTNS* |
| NONHSAG020542 | ENST00000574218 | *CTNS* |
| NONHSAG020542 | ENST00000046640 | *CTNS* |
| NONHSAG020542 | ENST00000381870 | *CTNS* |
| NONHSAG020542 | ENST00000441220 | *CTNS* |
| NR_073390 | ENST00000295701 | *RQCD1* |
| NR_073390 | ENST00000542068 | *RQCD1* |
| NR_073390 | ENST00000509807 | *RQCD1* |
| NR_073390 | ENST00000418808 | *RQCD1* |
| NR_073390 | ENST00000273064 | *RQCD1* |
| NR_049787 | ENST00000542478 | *SNX17* |
| NR_049787 | ENST00000233575 | *SNX17* |
| NR_049787 | ENST00000537606 | *SNX17* |
| NR_049787 | ENST00000543024 | *SNX17* |
| ENST00000589269 | ENST00000304718 | *GGNBP2* |
| ENST00000589269 | ENST00000588222 | *GGNBP2* |
| ENST00000590866 | ENST00000344663 | *MUM1* |
| ENST00000590866 | ENST00000415183 | *MUM1* |
| ENST00000590866 | ENST00000591337 | *MUM1* |
| ENST00000590866 | ENST00000591806 | *MUM1* |
| ENST00000590866 | ENST00000311401 | *MUM1* |
| ENST00000590866 | ENST00000592374 | *MUM1* |
| ENST00000547772 | ENST00000424649 | *PXN* |
| ENST00000547772 | ENST00000543331 | *PXN* |
| ENST00000547772 | ENST00000228307 | *PXN* |
| ENST00000547772 | ENST00000536957 | *PXN* |
| ENST00000547772 | ENST00000267257 | *PXN* |
| ENST00000449265 | ENST00000562345 | *ADAMTS18* |
| ENST00000449265 | ENST00000282849 | *ADAMTS18* |
| ENST00000474394 | ENST00000335497 | *RNF220* |
| ENST00000474394 | ENST00000440132 | *RNF220* |
| ENST00000474394 | ENST00000372247 | *RNF220* |
| ENST00000474394 | ENST00000361799 | *RNF220* |
| ENST00000474394 | ENST00000443020 | *RNF220* |
| ENST00000474394 | ENST00000355387 | *RNF220* |
| ENST00000491252 | ENST00000233623 | *TTC31* |
| ENST00000491252 | ENST00000410003 | *TTC31* |
| ENST00000491252 | ENST00000414247 | *TTC31* |
| ENST00000491252 | ENST00000442235 | *TTC31* |
| ENST00000580158 | ENST00000535458 | *KPNB1* |
| ENST00000580158 | ENST00000582097 | *KPNB1* |
| ENST00000580158 | ENST00000540627 | *KPNB1* |
| ENST00000580158 | ENST00000537679 | *KPNB1* |
| ENST00000580158 | ENST00000290158 | *KPNB1* |
| ENST00000488049 | ENST00000414007 | *SRGAP2* |
| ENST00000488049 | ENST00000439126 | *SRGAP2* |
| ENST00000488049 | ENST00000295713 | *SRGAP2* |
| ENST00000488049 | ENST00000426388 | *SRGAP2* |
| ENST00000488049 | ENST00000419187 | *SRGAP2* |
| ENST00000507356 | ENST00000506589 | *COMMD10* |
| ENST00000507356 | ENST00000515539 | *COMMD10* |
| ENST00000507356 | ENST00000274458 | *COMMD10* |
| ENST00000565846 | ENST00000422057 | *RFX7* |
| ENST00000565846 | ENST00000559447 | *RFX7* |
| ENST00000565846 | ENST00000317318 | *RFX7* |
| ENST00000565846 | ENST00000423270 | *RFX7* |
| ENST00000535739 | ENST00000536876 | *LTBR* |
| ENST00000535739 | ENST00000539925 | *LTBR* |
| ENST00000535739 | ENST00000541102 | *LTBR* |
| ENST00000535739 | ENST00000543190 | *LTBR* |
| ENST00000535739 | ENST00000228918 | *LTBR* |
| ENST00000477970 | ENST00000359947 | *PTPRF* |
| ENST00000477970 | ENST00000372413 | *PTPRF* |
| ENST00000477970 | ENST00000414879 | *PTPRF* |
| ENST00000477970 | ENST00000429895 | *PTPRF* |
| ENST00000477970 | ENST00000372407 | *PTPRF* |
| ENST00000477970 | ENST00000372414 | *PTPRF* |
| ENST00000477970 | ENST00000438120 | *PTPRF* |
| ENST00000477970 | ENST00000412568 | *PTPRF* |
| ENST00000477970 | ENST00000422171 | *PTPRF* |
| ENST00000470782 | ENST00000395857 | *NCOR1* |
| ENST00000470782 | ENST00000395849 | *NCOR1* |
| ENST00000470782 | ENST00000268712 | *NCOR1* |
| ENST00000470782 | ENST00000579573 | *NCOR1* |
| ENST00000470782 | ENST00000395851 | *NCOR1* |
| ENST00000470782 | ENST00000580554 | *NCOR1* |
| ENST00000470782 | ENST00000579606 | *NCOR1* |
| ENST00000470782 | ENST00000603989 | *NCOR1* |
| ENST00000482794 | ENST00000498086 | *ATP11B* |
| ENST00000482794 | ENST00000323116 | *ATP11B* |
| ENST00000482794 | ENST00000493826 | *ATP11B* |
| ENST00000473954 | ENST00000376511 | *PPP1R10* |
| ENST00000559036 | ENST00000354410 | *MEF2A* |
| ENST00000559036 | ENST00000558049 | *MEF2A* |
| ENST00000559036 | ENST00000449277 | *MEF2A* |
| ENST00000559036 | ENST00000560493 | *MEF2A* |
| ENST00000559036 | ENST00000338042 | *MEF2A* |
| ENST00000559036 | ENST00000557785 | *MEF2A* |
| ENST00000559036 | ENST00000558812 | *MEF2A* |
| ENST00000559036 | ENST00000557942 | *MEF2A* |
| ENST00000559036 | ENST00000453228 | *MEF2A* |
| ENST00000559036 | ENST00000559903 | *MEF2A* |
| ENST00000582095 | ENST00000269445 | *DYM* |
| ENST00000582095 | ENST00000583353 | *DYM* |
| ENST00000582095 | ENST00000442713 | *DYM* |
| ENST00000508557 | ENST00000196371 | *OXCT1* |
| ENST00000508557 | ENST00000509987 | *OXCT1* |
| ENST00000508557 | ENST00000512084 | *OXCT1* |
| ENST00000508557 | ENST00000510634 | *OXCT1* |
| ENST00000563641 | ENST00000539279 | *PARN* |
| ENST00000563641 | ENST00000437198 | *PARN* |
| ENST00000563641 | ENST00000341484 | *PARN* |
| ENST00000563641 | ENST00000420015 | *PARN* |
| ENST00000563641 | ENST00000562896 | *PARN* |
| ENST00000563641 | ENST00000569444 | *PARN* |
| ENST00000495534 | ENST00000382907 | *ZMYM5* |
| ENST00000495534 | ENST00000382905 | *ZMYM5* |
| ENST00000495534 | ENST00000502168 | *ZMYM5* |
| ENST00000495534 | ENST00000337963 | *ZMYM5* |
| ENST00000546295 | ENST00000171887 | *TNS1* |
| ENST00000484061 | ENST00000394850 | *TTC7A* |
| ENST00000484061 | ENST00000409245 | *TTC7A* |
| ENST00000484061 | ENST00000319190 | *TTC7A* |
| ENST00000484061 | ENST00000263737 | *TTC7A* |
| ENST00000522367 | ENST00000520578 | *G3BP1* |
| ENST00000522367 | ENST00000507878 | *G3BP1* |
| ENST00000522367 | ENST00000520006 | *G3BP1* |
| ENST00000522367 | ENST00000523519 | *G3BP1* |
| ENST00000522367 | ENST00000394123 | *G3BP1* |
| ENST00000522367 | ENST00000356245 | *G3BP1* |
| ENST00000522367 | ENST00000543466 | *G3BP1* |
| ENST00000585494 | ENST00000591215 | *FECH* |
| ENST00000585494 | ENST00000592699 | *FECH* |
| ENST00000585494 | ENST00000262093 | *FECH* |
| ENST00000585494 | ENST00000591977 | *FECH* |
| ENST00000585494 | ENST00000585747 | *FECH* |
| ENST00000585494 | ENST00000382873 | *FECH* |
| ENST00000524368 | ENST00000470747 | *RP1-170O19.20* |
| ENST00000577942 | ENST00000254928 | *ERAL1* |
| ENST00000577942 | ENST00000580917 | *ERAL1* |
| ENST00000577942 | ENST00000583487 | *ERAL1* |
| ENST00000506003 | ENST00000263409 | *LIFR* |
| ENST00000506003 | ENST00000453190 | *LIFR* |
| ENST00000524762 | ENST00000294119 | *UBXN1* |
| ENST00000524762 | ENST00000301935 | *UBXN1* |
| ENST00000524762 | ENST00000533000 | *UBXN1* |
| ENST00000524762 | ENST00000529640 | *UBXN1* |
| ENST00000524762 | ENST00000534176 | *UBXN1* |
| ENST00000492837 | ENST00000496391 | *PRKRIP1* |
| ENST00000492837 | ENST00000462601 | *PRKRIP1* |
| ENST00000461103 | ENST00000402868 | *SETD8* |
| ENST00000461103 | ENST00000437502 | *SETD8* |
| ENST00000461103 | ENST00000330479 | *SETD8* |
| NONHSAT070326 | ENST00000378669 | *COX7A2L* |
| NONHSAT070326 | ENST00000234301 | *COX7A2L* |
| NONHSAT070326 | ENST00000468711 | *COX7A2L* |
| NONHSAT070326 | ENST00000463055 | *COX7A2L* |
| ENST00000555718 | ENST00000337238 | *SMEK1* |
| ENST00000555718 | ENST00000554943 | *SMEK1* |
| ENST00000555718 | ENST00000555462 | *SMEK1* |
| ENST00000555718 | ENST00000428424 | *SMEK1* |
| ENST00000555718 | ENST00000554684 | *SMEK1* |
| ENST00000468799 | ENST00000420135 | *FAM228B* |
| ENST00000468799 | ENST00000448919 | *FAM228B* |
| ENST00000468799 | ENST00000407625 | *FAM228B* |
| ENST00000462860 | ENST00000326592 | *WASH4P* |
| NONHSAG035929 | ENST00000481591 | *ITGB5* |
| NONHSAG035929 | ENST00000296181 | *ITGB5* |
| NONHSAG035929 | ENST00000488466 | *ITGB5* |
| ENST00000453505 | ENST00000371656 | *TMEM189* |
| ENST00000453505 | ENST00000371650 | *TMEM189* |
| ENST00000453505 | ENST00000557021 | *TMEM189* |
| ENST00000453505 | ENST00000341698 | *TMEM189-UBE2V1* |
| ENST00000453505 | ENST00000371652 | *TMEM189* |
| ENST00000495659 | ENST00000397655 | *TCTN1* |
| ENST00000495659 | ENST00000550703 | *TCTN1* |
| ENST00000495659 | ENST00000551590 | *TCTN1* |
| ENST00000495659 | ENST00000397659 | *TCTN1* |
| ENST00000495659 | ENST00000377654 | *TCTN1* |
| ENST00000495659 | ENST00000549123 | *TCTN1* |
| ENST00000495659 | ENST00000471804 | *TCTN1* |
| ENST00000483801 | ENST00000375331 | *STK19* |
| ENST00000483801 | ENST00000375333 | *STK19* |
| ENST00000483801 | ENST00000460018 | *STK19* |
| ENST00000488489 | ENST00000246190 | *NECAB3* |
| ENST00000488489 | ENST00000473892 | *NECAB3* |
| ENST00000488489 | ENST00000480994 | *NECAB3* |
| ENST00000488489 | ENST00000606690 | *NECAB3* |
| ENST00000488489 | ENST00000439478 | *NECAB3* |
| ENST00000488489 | ENST00000375238 | *NECAB3* |
| ENST00000398654 | ENST00000587810 | *PIAS2* |
| ENST00000398654 | ENST00000324794 | *PIAS2* |
| ENST00000398654 | ENST00000586953 | *PIAS2* |
| ENST00000398654 | ENST00000589917 | *PIAS2* |
| ENST00000398654 | ENST00000585916 | *PIAS2* |
| ENST00000398654 | ENST00000592221 | *PIAS2* |
| ENST00000398654 | ENST00000545673 | *PIAS2* |
| ENST00000533037 | ENST00000533045 | *FIBP* |
| ENST00000533037 | ENST00000357519 | *FIBP* |
| ENST00000533037 | ENST00000338369 | *FIBP* |
| lnc-C9orf69-1:1 | ENST00000448040 | *C9ORF69* |
| lnc-C9orf69-1:1 | ENST00000561457 | *C9ORF69* |
| lnc-C9orf69-1:1 | ENST00000447934 | *C9ORF69* |
| lnc-C9orf69-1:1 | ENST00000418388 | *C9ORF69* |
| ENST00000489378 | ENST00000498107 | *SSBP1* |
| ENST00000489378 | ENST00000484178 | *SSBP1* |
| ENST00000489378 | ENST00000463093 | *SSBP1* |
| ENST00000489378 | ENST00000265304 | *SSBP1* |
| ENST00000489378 | ENST00000467681 | *SSBP1* |
| ENST00000489378 | ENST00000473783 | *SSBP1* |
| ENST00000489378 | ENST00000465582 | *SSBP1* |
| ENST00000489378 | ENST00000481508 | *SSBP1* |
| NONHSAT092403 | ENST00000458420 | *CLSTN2* |
| ENST00000582877 | ENST00000344140 | *CACNB1* |
| ENST00000582877 | ENST00000394310 | *CACNB1* |
| ENST00000582877 | ENST00000394303 | *CACNB1* |
| ENST00000484717 | ENST00000492491 | *VILL* |
| ENST00000484717 | ENST00000465644 | *VILL* |
| ENST00000484717 | ENST00000416303 | *VILL* |
| ENST00000484717 | ENST00000283713 | *VILL* |
| ENST00000484717 | ENST00000383759 | *VILL* |
| ENST00000476134 | ENST00000374179 | *MAPK8* |
| ENST00000476134 | ENST00000374176 | *MAPK8* |
| ENST00000476134 | ENST00000395611 | *MAPK8* |
| ENST00000476134 | ENST00000429041 | *MAPK8* |
| ENST00000476134 | ENST00000374182 | *MAPK8* |
| ENST00000476134 | ENST00000426557 | *MAPK8* |
| ENST00000476134 | ENST00000374189 | *MAPK8* |
| ENST00000476134 | ENST00000360332 | *MAPK8* |
| ENST00000476134 | ENST00000432379 | *MAPK8* |
| ENST00000476134 | ENST00000374174 | *MAPK8* |
| ENST00000512131 | ENST00000503219 | *SH3BP2* |
| ENST00000512131 | ENST00000356331 | *SH3BP2* |
| ENST00000512131 | ENST00000513095 | *SH3BP2* |
| ENST00000512131 | ENST00000435136 | *SH3BP2* |
| ENST00000512131 | ENST00000442312 | *SH3BP2* |
| ENST00000512131 | ENST00000452765 | *SH3BP2* |
| ENST00000512131 | ENST00000508385 | *SH3BP2* |
| ENST00000512131 | ENST00000511747 | *SH3BP2* |
| ENST00000512131 | ENST00000502260 | *SH3BP2* |
| ENST00000512131 | ENST00000504294 | *SH3BP2* |
| ENST00000512131 | ENST00000512014 | *SH3BP2* |
| ENST00000512131 | ENST00000389838 | *SH3BP2* |
| ENST00000512131 | ENST00000503393 | *SH3BP2* |
| ENST00000491491 | ENST00000544440 | *MYCBP2* |
| ENST00000491491 | ENST00000407578 | *MYCBP2* |
| ENST00000491491 | ENST00000360084 | *MYCBP2* |
| ENST00000491491 | ENST00000357337 | *MYCBP2* |
| ENST00000462654 | ENST00000392081 | *SIRT2* |
| ENST00000462654 | ENST00000249396 | *SIRT2* |
| ENST00000462654 | ENST00000381766 | *SIRT2* |
| ENST00000462654 | ENST00000358931 | *SIRT2* |
| ENST00000462654 | ENST00000437828 | *SIRT2* |
| ENST00000462654 | ENST00000407552 | *SIRT2* |
| ENST00000462654 | ENST00000447739 | *SIRT2* |
| ENST00000462654 | ENST00000414941 | *SIRT2* |
| ENST00000413132 | ENST00000427926 | *CLTCL1* |
| ENST00000413132 | ENST00000263200 | *CLTCL1* |
| ENST00000413132 | ENST00000353891 | *CLTCL1* |
| ENST00000413132 | ENST00000449918 | *CLTCL1* |
| ENST00000514031 | ENST00000514800 | *MFSD10* |
| ENST00000514031 | ENST00000507555 | *MFSD10* |
| ENST00000514031 | ENST00000329687 | *MFSD10* |
| ENST00000514031 | ENST00000508221 | *MFSD10* |
| ENST00000514031 | ENST00000355443 | *MFSD10* |
| NONHSAT016853 | ENST00000337318 | *FAM53B* |
| NONHSAT016853 | ENST00000280780 | *FAM53B* |
| NONHSAT016853 | ENST00000392754 | *FAM53B* |
| NONHSAT115106 | ENST00000308191 | *PDE7B* |
| ENST00000493688 | ENST00000457990 | *PPP4R1L* |
| ENST00000493688 | ENST00000422302 | *PPP4R1L* |
| ENST00000493688 | ENST00000334187 | *PPP4R1L* |
| ENST00000493688 | ENST00000244070 | *PPP4R1L* |
| UCSC_TCONS_l2_00026034 | ENST00000419923 | *UPK3B* |
| UCSC_TCONS_l2_00026034 | ENST00000443097 | *UPK3B* |
| ENST00000464489 | ENST00000475616 | *MYLK* |
| ENST00000464489 | ENST00000578202 | *MYLK* |
| ENST00000464489 | ENST00000359169 | *MYLK* |
| ENST00000464489 | ENST00000418370 | *MYLK* |
| ENST00000464489 | ENST00000360304 | *MYLK* |
| ENST00000464489 | ENST00000346322 | *MYLK* |
| ENST00000464489 | ENST00000360772 | *MYLK* |
| ENST00000464489 | ENST00000354792 | *MYLK* |
| ENST00000464489 | ENST00000583087 | *MYLK* |
| ENST00000464489 | ENST00000508240 | *MYLK* |
| ENST00000549268 | ENST00000353364 | *USP15* |
| ENST00000549268 | ENST00000280377 | *USP15* |
| ENST00000549268 | ENST00000393654 | *USP15* |
| ENST00000509576 | ENST00000330503 | *DDX41* |
| ENST00000509576 | ENST00000507955 | *DDX41* |
| ENST00000482811 | ENST00000449370 | *MAN1A2* |
| ENST00000482811 | ENST00000356554 | *MAN1A2* |
| ENST00000574593 | ENST00000301740 | *SRRM2* |
| ENST00000409452 | ENST00000396429 | *OSBPL3* |
| ENST00000409452 | ENST00000396431 | *OSBPL3* |
| ENST00000409452 | ENST00000352860 | *OSBPL3* |
| ENST00000409452 | ENST00000415162 | *OSBPL3* |
| ENST00000409452 | ENST00000415952 | *OSBPL3* |
| ENST00000409452 | ENST00000431825 | *OSBPL3* |
| ENST00000409452 | ENST00000313367 | *OSBPL3* |
| ENST00000409452 | ENST00000353930 | *OSBPL3* |
| ENST00000409452 | ENST00000409069 | *OSBPL3* |
| ENST00000409452 | ENST00000441059 | *OSBPL3* |
| NR_024123 | ENST00000373483 | *PBX3* |
| NR_024123 | ENST00000373489 | *PBX3* |
| NR_024123 | ENST00000342287 | *PBX3* |
| NR_024123 | ENST00000447726 | *PBX3* |
| NR_024123 | ENST00000491787 | *PBX3* |
| NR_024123 | ENST00000373487 | *PBX3* |
| NR_024123 | ENST00000428092 | *PBX3* |
| ENST00000399247 | ENST00000440587 | *HLA-F* |
| ENST00000399247 | ENST00000259951 | *HLA-F* |
| ENST00000399247 | ENST00000444621 | *HLA-F* |
| NONHSAT148161 | ENST00000304283 | *ANKS3* |
| NONHSAT148161 | ENST00000585773 | *ANKS3* |
| NONHSAT148161 | ENST00000450067 | *ANKS3* |
| NONHSAT148161 | ENST00000586166 | *ANKS3* |
| NONHSAT148161 | ENST00000592190 | *ANKS3* |
| NONHSAT148161 | ENST00000586605 | *ANKS3* |
| NONHSAT148161 | ENST00000592698 | *ANKS3* |
| NONHSAT148161 | ENST00000592421 | *ANKS3* |
| NONHSAT148161 | ENST00000446014 | *ANKS3* |
| NONHSAT148161 | ENST00000589065 | *ANKS3* |
| ENST00000526341 | ENST00000525087 | *GPAA1* |
| ENST00000526341 | ENST00000524418 | *GPAA1* |
| ENST00000526341 | ENST00000530258 | *GPAA1* |
| ENST00000526341 | ENST00000361036 | *GPAA1* |
| ENST00000526341 | ENST00000355091 | *GPAA1* |
| ENST00000559603 | ENST00000336301 | *RNF213* |
| ENST00000559603 | ENST00000508628 | *RNF213* |
| ENST00000559603 | ENST00000582970 | *RNF213* |
| ENST00000568086 | ENST00000565560 | *NOL3* |
| ENST00000460212 | ENST00000351429 | *N6AMT1* |
| ENST00000460212 | ENST00000303775 | *N6AMT1* |
| ENST00000586094 | ENST00000355114 | *ZNF565* |
| ENST00000483739 | ENST00000294360 | *C1ORF123* |
| ENST00000479446 | ENST00000490486 | *ABCA2* |
| ENST00000479446 | ENST00000341511 | *ABCA2* |
| ENST00000479446 | ENST00000448336 | *ABCA2* |
| ENST00000479446 | ENST00000371605 | *ABCA2* |
| ENST00000479446 | ENST00000265662 | *ABCA2* |
| ENST00000597983 | ENST00000586682 | *RAB8A* |
| ENST00000597983 | ENST00000300935 | *RAB8A* |
| ENST00000464902 | ENST00000409097 | *ZFAND2B* |
| ENST00000464902 | ENST00000409336 | *ZFAND2B* |
| ENST00000464902 | ENST00000409217 | *ZFAND2B* |
| ENST00000464902 | ENST00000409594 | *ZFAND2B* |
| ENST00000464902 | ENST00000422255 | *ZFAND2B* |
| ENST00000464902 | ENST00000409412 | *ZFAND2B* |
| ENST00000464902 | ENST00000436556 | *ZFAND2B* |
| ENST00000464902 | ENST00000425849 | *ZFAND2B* |
| ENST00000464902 | ENST00000444522 | *ZFAND2B* |
| ENST00000464902 | ENST00000409319 | *ZFAND2B* |
| ENST00000464902 | ENST00000289528 | *ZFAND2B* |
| ENST00000464902 | ENST00000409206 | *ZFAND2B* |
| ENST00000491831 | ENST00000378595 | *AFF4* |
| ENST00000491831 | ENST00000265343 | *AFF4* |
| ENST00000491831 | ENST00000425658 | *AFF4* |
| ENST00000491831 | ENST00000421773 | *AFF4* |
| ENST00000490599 | ENST00000375259 | *SLC35D2* |
| ENST00000490599 | ENST00000253270 | *SLC35D2* |
| NONHSAT083944 | ENST00000423392 | *RGL4* |
| NONHSAT083944 | ENST00000401461 | *RGL4* |
| NONHSAT083944 | ENST00000290691 | *RGL4* |
| NONHSAG018920 | ENST00000450465 | *TNRC6A* |
| NONHSAG018920 | ENST00000395799 | *TNRC6A* |
| NONHSAG018920 | ENST00000315183 | *TNRC6A* |
| ENST00000598355 | ENST00000597136 | *TRIM28* |
| ENST00000598355 | ENST00000253024 | *TRIM28* |
| ENST00000598355 | ENST00000341753 | *TRIM28* |
| NR_073201 | ENST00000380424 | *DENND4C* |
| NR_073201 | ENST00000434457 | *DENND4C* |
| NR_073201 | ENST00000380432 | *DENND4C* |
| NR_073201 | ENST00000361024 | *DENND4C* |
| NR_073201 | ENST00000602925 | *DENND4C* |
| NR_073201 | ENST00000380427 | *DENND4C* |
| ENST00000447863 | ENST00000394702 | *DMTF1* |
| ENST00000447863 | ENST00000423590 | *DMTF1* |
| ENST00000447863 | ENST00000414194 | *DMTF1* |
| ENST00000447863 | ENST00000331242 | *DMTF1* |
| ENST00000447863 | ENST00000425705 | *DMTF1* |
| ENST00000447863 | ENST00000582925 | *DMTF1* |
| ENST00000447863 | ENST00000432937 | *DMTF1* |
| ENST00000447863 | ENST00000428819 | *DMTF1* |
| ENST00000447863 | ENST00000434534 | *DMTF1* |
| ENST00000447863 | ENST00000432366 | *DMTF1* |
| ENST00000447863 | ENST00000453049 | *DMTF1* |
| ENST00000447863 | ENST00000449088 | *DMTF1* |
| ENST00000447863 | ENST00000430405 | *DMTF1* |
| ENST00000447863 | ENST00000413276 | *DMTF1* |
| ENST00000447863 | ENST00000448598 | *DMTF1* |
| ENST00000447863 | ENST00000394703 | *DMTF1* |
| ENST00000447863 | ENST00000446796 | *DMTF1* |
| ENST00000447863 | ENST00000420131 | *DMTF1* |
| ENST00000447863 | ENST00000414630 | *DMTF1* |
| ENST00000447863 | ENST00000582204 | *DMTF1* |
| ENST00000447863 | ENST00000579592 | *DMTF1* |
| ENST00000447863 | ENST00000411766 | *DMTF1* |
| ENST00000447863 | ENST00000454008 | *DMTF1* |
| ENST00000496989 | ENST00000425019 | *MAP4K4* |
| ENST00000496989 | ENST00000324219 | *MAP4K4* |
| ENST00000496989 | ENST00000413150 | *MAP4K4* |
| ENST00000496989 | ENST00000347699 | *MAP4K4* |
| ENST00000496989 | ENST00000456652 | *MAP4K4* |
| ENST00000496989 | ENST00000427603 | *MAP4K4* |
| ENST00000496989 | ENST00000350198 | *MAP4K4* |
| ENST00000496989 | ENST00000302217 | *MAP4K4* |
| ENST00000496989 | ENST00000417294 | *MAP4K4* |
| ENST00000496989 | ENST00000350878 | *MAP4K4* |
| ENST00000568329 | ENST00000220003 | *CSK* |
| ENST00000568329 | ENST00000569462 | *CSK* |
| ENST00000568329 | ENST00000567123 | *CSK* |
| ENST00000568329 | ENST00000569915 | *CSK* |
| ENST00000568329 | ENST00000567571 | *CSK* |
| ENST00000568329 | ENST00000309470 | *CSK* |
| ENST00000568329 | ENST00000439220 | *CSK* |
| ENST00000481266 | ENST00000360190 | *CDK5RAP2* |
| ENST00000481266 | ENST00000349780 | *CDK5RAP2* |
| ENST00000481266 | ENST00000359309 | *CDK5RAP2* |
| ENST00000481266 | ENST00000482047 | *CDK5RAP2* |
| ENST00000481266 | ENST00000360822 | *CDK5RAP2* |
| ENST00000490639 | ENST00000264613 | *CP* |
| ENST00000490639 | ENST00000494544 | *CP* |
| ENST00000490639 | ENST00000455472 | *CP* |
| ENST00000490639 | ENST00000479771 | *CP* |
| ENST00000466192 | ENST00000343916 | *COL9A3* |
| ENST00000588552 | ENST00000587303 | *PTPRS* |
| ENST00000588552 | ENST00000348075 | *PTPRS* |
| ENST00000588552 | ENST00000262963 | *PTPRS* |
| ENST00000588552 | ENST00000357368 | *PTPRS* |
| ENST00000588552 | ENST00000590509 | *PTPRS* |
| ENST00000588552 | ENST00000372412 | *PTPRS* |
| ENST00000588552 | ENST00000592099 | *PTPRS* |
| ENST00000588552 | ENST00000586065 | *PTPRS* |
| ENST00000588552 | ENST00000588012 | *PTPRS* |
| ENST00000588552 | ENST00000591760 | *PTPRS* |
| ENST00000588552 | ENST00000353284 | *PTPRS* |
| ENST00000472295 | ENST00000380113 | *ITPA* |
| ENST00000472295 | ENST00000455664 | *ITPA* |
| ENST00000472295 | ENST00000399838 | *ITPA* |
| ENST00000484135 | ENST00000348564 | *PTPRC* |
| ENST00000484135 | ENST00000594404 | *PTPRC* |
| ENST00000484135 | ENST00000367379 | *PTPRC* |
| ENST00000581150 | ENST00000602676 | *OAZ1* |
| ENST00000581150 | ENST00000582888 | *OAZ1* |
| ENST00000581150 | ENST00000583542 | *OAZ1* |
| ENST00000581150 | ENST00000322297 | *OAZ1* |
| ENST00000581150 | ENST00000588673 | *OAZ1* |
| ENST00000554952 | ENST00000606149 | *PSMC6* |
| ENST00000554952 | ENST00000556813 | *PSMC6* |
| ENST00000554952 | ENST00000445930 | *PSMC6* |
| ENST00000554952 | ENST00000555339 | *PSMC6* |
| ENST00000518174 | ENST00000523761 | *TMEM66* |
| ENST00000518174 | ENST00000521265 | *TMEM66* |
| ENST00000518174 | ENST00000536273 | *TMEM66* |
| ENST00000518174 | ENST00000256255 | *TMEM66* |
| ENST00000518174 | ENST00000518296 | *TMEM66* |
| ENST00000518174 | ENST00000522794 | *TMEM66* |
| ENST00000518174 | ENST00000545648 | *TMEM66* |
| ENST00000518174 | ENST00000523127 | *TMEM66* |
| NR_037675 | ENST00000552360 | *PRR24* |
| ENST00000534562 | ENST00000447399 | *SWAP70* |
| ENST00000534562 | ENST00000318950 | *SWAP70* |
| ENST00000534562 | ENST00000534662 | *SWAP70* |
| ENST00000607388 | ENST00000425871 | *RPF2* |
| ENST00000607388 | ENST00000441448 | *RPF2* |
| ENST00000515687 | ENST00000306200 | *STX18* |
| ENST00000515687 | ENST00000505286 | *STX18* |
| ENST00000571796 | ENST00000576760 | *TBCD* |
| ENST00000571796 | ENST00000572953 | *TBCD* |
| ENST00000571796 | ENST00000571712 | *TBCD* |
| ENST00000571796 | ENST00000397466 | *TBCD* |
| ENST00000571796 | ENST00000572984 | *TBCD* |
| ENST00000571796 | ENST00000576996 | *TBCD* |
| ENST00000571796 | ENST00000577051 | *TBCD* |
| ENST00000571796 | ENST00000355528 | *TBCD* |
| ENST00000571796 | ENST00000574975 | *TBCD* |
| ENST00000571796 | ENST00000574422 | *TBCD* |
| ENST00000571796 | ENST00000539345 | *TBCD* |
| ENST00000571796 | ENST00000571316 | *TBCD* |
| ENST00000571796 | ENST00000576160 | *TBCD* |
| ENST00000469328 | ENST00000378717 | *IMPDH1* |
| ENST00000469328 | ENST00000470772 | *IMPDH1* |
| ENST00000469328 | ENST00000338791 | *IMPDH1* |
| ENST00000469328 | ENST00000480861 | *IMPDH1* |
| ENST00000469328 | ENST00000419067 | *IMPDH1* |
| ENST00000469328 | ENST00000343214 | *IMPDH1* |
| ENST00000469328 | ENST00000496200 | *IMPDH1* |
| ENST00000469328 | ENST00000354269 | *IMPDH1* |
| ENST00000469328 | ENST00000497868 | *IMPDH1* |
| ENST00000469328 | ENST00000489263 | *IMPDH1* |
| ENST00000469328 | ENST00000348127 | *IMPDH1* |
| NR_045102 | ENST00000480444 | *RNF146* |
| NR_045102 | ENST00000476956 | *RNF146* |
| NR_045102 | ENST00000610162 | *RNF146* |
| NR_045102 | ENST00000356799 | *RNF146* |
| NR_045102 | ENST00000477776 | *RNF146* |
| NR_045102 | ENST00000309649 | *RNF146* |
| NR_045102 | ENST00000608991 | *RNF146* |
| NR_045102 | ENST00000609944 | *RNF146* |
| NR_045102 | ENST00000368314 | *RNF146* |
| NR_045102 | ENST00000609447 | *RNF146* |
| NR_045102 | ENST00000610153 | *RNF146* |
| ENST00000546520 | ENST00000551374 | *SLC38A2* |
| ENST00000546520 | ENST00000256689 | *SLC38A2* |
| NONHSAT024510 | ENST00000264018 | *DDX6* |
| ENST00000481761 | ENST00000456378 | *UBP1* |
| ENST00000481761 | ENST00000283629 | *UBP1* |
| ENST00000481761 | ENST00000447368 | *UBP1* |
| ENST00000481761 | ENST00000283628 | *UBP1* |
| ENST00000561246 | ENST00000559078 | *EMC4* |
| ENST00000561246 | ENST00000559421 | *EMC4* |
| ENST00000561246 | ENST00000249209 | *EMC4* |
| ENST00000561246 | ENST00000267750 | *EMC4* |
| ENST00000561246 | ENST00000561372 | *EMC4* |
| ENST00000561246 | ENST00000560947 | *EMC4* |
| ENST00000518955 | ENST00000508716 | *SKIV2L2* |
| ENST00000518955 | ENST00000230640 | *SKIV2L2* |
| ENST00000518955 | ENST00000545714 | *SKIV2L2* |
| ENST00000534321 | ENST00000529826 | *BCLAF1* |
| ENST00000534321 | ENST00000530767 | *BCLAF1* |
| ENST00000534321 | ENST00000531224 | *BCLAF1* |
| ENST00000534321 | ENST00000534762 | *BCLAF1* |
| ENST00000534321 | ENST00000392348 | *BCLAF1* |
| ENST00000534321 | ENST00000527759 | *BCLAF1* |
| ENST00000534321 | ENST00000353331 | *BCLAF1* |
| ENST00000534321 | ENST00000527536 | *BCLAF1* |
| ENST00000534321 | ENST00000031135 | *BCLAF1* |
| ENST00000480153 | ENST00000373750 | *DSN1* |
| ENST00000480153 | ENST00000438549 | *DSN1* |
| ENST00000480153 | ENST00000373740 | *DSN1* |
| ENST00000480153 | ENST00000373745 | *DSN1* |
| ENST00000480153 | ENST00000426836 | *DSN1* |
| ENST00000480153 | ENST00000447406 | *DSN1* |
| ENST00000480153 | ENST00000373734 | *DSN1* |
| ENST00000480153 | ENST00000448110 | *DSN1* |
| ENST00000496559 | ENST00000383703 | *LRIG1* |
| ENST00000496559 | ENST00000273261 | *LRIG1* |
| ENST00000445682 | ENST00000401461 | *RGL4* |
| ENST00000445682 | ENST00000423392 | *RGL4* |
| ENST00000445682 | ENST00000290691 | *RGL4* |
| lnc-FAM133B-1:1 | ENST00000424848 | *CDK6* |
| lnc-FAM133B-1:1 | ENST00000265734 | *CDK6* |
| ENST00000487012 | ENST00000284322 | *ABI3BP* |
| ENST00000487012 | ENST00000482765 | *ABI3BP* |
| ENST00000487012 | ENST00000478235 | *ABI3BP* |
| ENST00000487012 | ENST00000495063 | *ABI3BP* |
| ENST00000487012 | ENST00000471901 | *ABI3BP* |
| ENST00000487012 | ENST00000527943 | *ABI3BP* |
| ENST00000487012 | ENST00000534413 | *ABI3BP* |
| ENST00000487012 | ENST00000383691 | *ABI3BP* |
| ENST00000487012 | ENST00000497395 | *ABI3BP* |
| ENST00000487012 | ENST00000495591 | *ABI3BP* |
| ENST00000487012 | ENST00000533795 | *ABI3BP* |
| ENST00000487012 | ENST00000486770 | *ABI3BP* |
| ENST00000487012 | ENST00000471714 | *ABI3BP* |
| ENST00000487012 | ENST00000528490 | *ABI3BP* |
| ENST00000487012 | ENST00000534256 | *ABI3BP* |
| ENST00000487012 | ENST00000466947 | *ABI3BP* |
| ENST00000593417 | ENST00000540132 | *ALDH16A1* |
| ENST00000593417 | ENST00000455361 | *ALDH16A1* |
| ENST00000593417 | ENST00000293350 | *ALDH16A1* |
| ENST00000593417 | ENST00000433981 | *ALDH16A1* |
| ENST00000359681 | ENST00000598925 | *RPL37A* |
| ENST00000359681 | ENST00000446558 | *RPL37A* |
| ENST00000359681 | ENST00000600880 | *RPL37A* |
| ENST00000359681 | ENST00000456586 | *RPL37A* |
| ENST00000359681 | ENST00000491306 | *RPL37A* |
| ENST00000359681 | ENST00000441179 | *RPL37A* |
| ENST00000359681 | ENST00000427280 | *RPL37A* |
| ENST00000555568 | ENST00000476071 | *NSFL1C* |
| ENST00000555568 | ENST00000216879 | *NSFL1C* |
| ENST00000555568 | ENST00000381658 | *NSFL1C* |
| ENST00000555568 | ENST00000353088 | *NSFL1C* |
| ENST00000555568 | ENST00000350991 | *NSFL1C* |
| ENST00000529115 | ENST00000438658 | *RNH1* |
| ENST00000529115 | ENST00000527485 | *RNH1* |
| ENST00000529115 | ENST00000531540 | *RNH1* |
| ENST00000529115 | ENST00000529368 | *RNH1* |
| ENST00000529115 | ENST00000529768 | *RNH1* |
| ENST00000529115 | ENST00000531149 | *RNH1* |
| ENST00000529115 | ENST00000356187 | *RNH1* |
| ENST00000529115 | ENST00000354420 | *RNH1* |
| ENST00000529115 | ENST00000397614 | *RNH1* |
| ENST00000529115 | ENST00000529306 | *RNH1* |
| ENST00000529115 | ENST00000532055 | *RNH1* |
| ENST00000529115 | ENST00000533410 | *RNH1* |
| ENST00000529115 | ENST00000397615 | *RNH1* |
| ENST00000529115 | ENST00000397604 | *RNH1* |
| ENST00000529115 | ENST00000534797 | *RNH1* |
| ENST00000520916 | ENST00000320203 | *RBPMS* |
| ENST00000520916 | ENST00000287771 | *RBPMS* |
| ENST00000520916 | ENST00000397323 | *RBPMS* |
| ENST00000520916 | ENST00000538486 | *RBPMS* |
| ENST00000487078 | ENST00000360131 | *AGBL5* |
| ENST00000487078 | ENST00000441931 | *AGBL5* |
| ENST00000487078 | ENST00000453161 | *AGBL5* |
| ENST00000487078 | ENST00000421915 | *AGBL5* |
| ENST00000487078 | ENST00000437006 | *AGBL5* |
| ENST00000487078 | ENST00000451003 | *AGBL5* |
| ENST00000487078 | ENST00000323064 | *AGBL5* |
| ENST00000478771 | ENST00000223271 | *RARRES2* |
| ENST00000478771 | ENST00000466675 | *RARRES2* |
| ENST00000478771 | ENST00000467793 | *RARRES2* |
| ENST00000478771 | ENST00000482669 | *RARRES2* |
| ENST00000558412 | ENST00000558453 | *WDR61* |
| NONHSAT017351 | ENST00000530404 | *TSPAN4* |
| NONHSAT017351 | ENST00000397406 | *TSPAN4* |
| NONHSAT017351 | ENST00000527644 | *TSPAN4* |
| NONHSAT017351 | ENST00000346501 | *TSPAN4* |
| NONHSAT017351 | ENST00000397411 | *TSPAN4* |
| NONHSAT017351 | ENST00000397397 | *TSPAN4* |
| NONHSAT017351 | ENST00000409531 | *TSPAN4* |
| NONHSAT017351 | ENST00000525334 | *TSPAN4* |
| NONHSAT017351 | ENST00000525201 | *TSPAN4* |
| NONHSAT017351 | ENST00000532375 | *TSPAN4* |
| NONHSAT017351 | ENST00000397396 | *TSPAN4* |
| NONHSAT017351 | ENST00000397404 | *TSPAN4* |
| NONHSAT017351 | ENST00000409543 | *TSPAN4* |
| NONHSAT017351 | ENST00000397408 | *TSPAN4* |
| NONHSAT069764 | ENST00000423998 | *GTF3C2* |
| NONHSAT069764 | ENST00000457748 | *GTF3C2* |
| NONHSAT069764 | ENST00000359541 | *GTF3C2* |
| NONHSAT069764 | ENST00000264720 | *GTF3C2* |
| ENST00000449079 | ENST00000342725 | *EBF4* |
| ENST00000449079 | ENST00000380648 | *EBF4* |
| ENST00000449079 | ENST00000609451 | *EBF4* |
| ENST00000449079 | ENST00000463145 | *EBF4* |
| ENST00000551200 | ENST00000551744 | *NUP37* |
| ENST00000551200 | ENST00000550459 | *NUP37* |
| ENST00000551200 | ENST00000251074 | *NUP37* |
| ENST00000551200 | ENST00000552283 | *NUP37* |
| ENST00000576958 | ENST00000304992 | *PRPF8* |
| ENST00000576958 | ENST00000572621 | *PRPF8* |
| ENST00000576958 | ENST00000577001 | *PRPF8* |
| ENST00000528504 | ENST00000529845 | *DDHD2* |
| ENST00000528504 | ENST00000397166 | *DDHD2* |
| ENST00000528504 | ENST00000520272 | *DDHD2* |
| ENST00000528504 | ENST00000532106 | *DDHD2* |
| ENST00000528504 | ENST00000526144 | *DDHD2* |
| ENST00000528504 | ENST00000517385 | *DDHD2* |
| ENST00000548468 | ENST00000550487 | *COX14* |
| ENST00000548468 | ENST00000550654 | *COX14* |
| ENST00000548468 | ENST00000317943 | *COX14* |
| ENST00000548468 | ENST00000548985 | *COX14* |
| NR_036539 | ENST00000596206 | *AC132192.1* |
| ENST00000547790 | ENST00000546731 | *APPL2* |
| ENST00000547790 | ENST00000258530 | *APPL2* |
| ENST00000547790 | ENST00000539978 | *APPL2* |
| ENST00000547790 | ENST00000553109 | *APPL2* |
| ENST00000547790 | ENST00000551662 | *APPL2* |
| ENST00000586146 | ENST00000588025 | *FARSA* |
| ENST00000586146 | ENST00000587488 | *FARSA* |
| ENST00000586146 | ENST00000587981 | *FARSA* |
| ENST00000586146 | ENST00000314606 | *FARSA* |
| ENST00000586146 | ENST00000423140 | *FARSA* |
| ENST00000586146 | ENST00000593021 | *FARSA* |
| NONHSAG035942 | ENST00000492394 | *ZNF148* |
| NONHSAG035942 | ENST00000360647 | *ZNF148* |
| NONHSAG035942 | ENST00000544464 | *ZNF148* |
| NONHSAG035942 | ENST00000468369 | *ZNF148* |
| NONHSAG035942 | ENST00000423114 | *SLC12A8* |
| NONHSAG035942 | ENST00000485866 | *ZNF148* |
| NONHSAG035942 | ENST00000484491 | *ZNF148* |
| ENST00000526919 | ENST00000534176 | *UBXN1* |
| ENST00000526919 | ENST00000533000 | *UBXN1* |
| ENST00000526919 | ENST00000529640 | *UBXN1* |
| ENST00000526919 | ENST00000301935 | *UBXN1* |
| ENST00000526919 | ENST00000294119 | *UBXN1* |
| ENST00000510734 | ENST00000502877 | *CLTB* |
| ENST00000510734 | ENST00000310418 | *CLTB* |
| ENST00000510734 | ENST00000345807 | *CLTB* |
| ENST00000510734 | ENST00000508425 | *CLTB* |
| ENST00000589157 | ENST00000398558 | *MFSD12* |
| ENST00000589157 | ENST00000389395 | *MFSD12* |
| ENST00000486891 | ENST00000440666 | *ZNF76* |
| ENST00000486891 | ENST00000373953 | *ZNF76* |
| ENST00000486891 | ENST00000339411 | *ZNF76* |
| ENST00000486891 | ENST00000469195 | *ZNF76* |
| ENST00000476729 | ENST00000456573 | *FLOT1* |
| ENST00000476729 | ENST00000454845 | *FLOT1* |
| ENST00000476729 | ENST00000445853 | *FLOT1* |
| ENST00000476729 | ENST00000438162 | *FLOT1* |
| ENST00000476729 | ENST00000413165 | *FLOT1* |
| ENST00000476729 | ENST00000416018 | *FLOT1* |
| ENST00000476729 | ENST00000418160 | *FLOT1* |
| ENST00000476729 | ENST00000376389 | *FLOT1* |
| ENST00000468205 | ENST00000375842 | *ABHD16A* |
| ENST00000468205 | ENST00000395952 | *ABHD16A* |
| ENST00000468205 | ENST00000461287 | *XXBAC-BPG32J3.20* |
| ENST00000468205 | ENST00000440843 | *ABHD16A* |
| NR_029427 | ENST00000218056 | *WDR13* |
| NR_029427 | ENST00000376729 | *WDR13* |
| ENST00000532772 | ENST00000450926 | *CPSF3L* |
| ENST00000532772 | ENST00000540437 | *CPSF3L* |
| ENST00000532772 | ENST00000421495 | *CPSF3L* |
| ENST00000532772 | ENST00000534345 | *CPSF3L* |
| ENST00000532772 | ENST00000545578 | *CPSF3L* |
| ENST00000532772 | ENST00000498476 | *CPSF3L* |
| ENST00000532772 | ENST00000419704 | *CPSF3L* |
| ENST00000532772 | ENST00000434694 | *CPSF3L* |
| ENST00000532772 | ENST00000530031 | *CPSF3L* |
| ENST00000532772 | ENST00000411962 | *CPSF3L* |
| ENST00000532772 | ENST00000435064 | *CPSF3L* |
| ENST00000532772 | ENST00000526332 | *CPSF3L* |
| ENST00000532772 | ENST00000527719 | *CPSF3L* |
| ENST00000601697 | ENST00000157812 | *PSMC4* |
| ENST00000601697 | ENST00000455878 | *PSMC4* |
| ENST00000478653 | ENST00000342104 | *NBPF3* |
| ENST00000478653 | ENST00000318220 | *NBPF3* |
| ENST00000478653 | ENST00000434838 | *NBPF3* |
| ENST00000478653 | ENST00000318249 | *NBPF3* |
| ENST00000478653 | ENST00000454000 | *NBPF3* |
| ENST00000388749 | ENST00000600233 | *HNRNPL* |
| ENST00000388749 | ENST00000601813 | *HNRNPL* |
| ENST00000388749 | ENST00000594769 | *AC104534.3* |
| ENST00000388749 | ENST00000600873 | *HNRNPL* |
| ENST00000388749 | ENST00000602021 | *AC104534.3* |
| ENST00000388749 | ENST00000601449 | *HNRNPL* |
| ENST00000388749 | ENST00000221419 | *HNRNPL* |
| NONHSAT039672 | ENST00000553625 | *YY1* |
| NONHSAT039672 | ENST00000262238 | *YY1* |
| NONHSAT039672 | ENST00000554804 | *YY1* |
| ENST00000531425 | ENST00000301332 | *KIFC2* |
| ENST00000531425 | ENST00000301331 | *KIFC2* |
| ENST00000552844 | ENST00000370217 | *ARHGAP29* |
| ENST00000552844 | ENST00000260526 | *ARHGAP29* |
| ENST00000470518 | ENST00000248929 | *SGSM3* |
| ENST00000470518 | ENST00000417424 | *SGSM3* |
| ENST00000470518 | ENST00000454798 | *SGSM3* |
| ENST00000470518 | ENST00000427834 | *SGSM3* |
| ENST00000483575 | ENST00000371144 | *STAG2* |
| ENST00000483575 | ENST00000371145 | *STAG2* |
| ENST00000483575 | ENST00000371157 | *STAG2* |
| ENST00000483575 | ENST00000428941 | *STAG2* |
| ENST00000483575 | ENST00000435215 | *STAG2* |
| ENST00000483575 | ENST00000371160 | *STAG2* |
| ENST00000483575 | ENST00000394477 | *STAG2* |
| ENST00000483575 | ENST00000354548 | *STAG2* |
| ENST00000483575 | ENST00000394478 | *STAG2* |
| ENST00000483575 | ENST00000455404 | *STAG2* |
| ENST00000483575 | ENST00000435103 | *STAG2* |
| ENST00000483575 | ENST00000458700 | *STAG2* |
| ENST00000483575 | ENST00000218089 | *STAG2* |
| ENST00000471500 | ENST00000482835 | *MFSD1* |
| ENST00000471500 | ENST00000474670 | *MFSD1* |
| ENST00000471500 | ENST00000465739 | *MFSD1* |
| ENST00000471500 | ENST00000392813 | *MFSD1* |
| ENST00000471500 | ENST00000264266 | *MFSD1* |
| ENST00000471500 | ENST00000415822 | *MFSD1* |
| ENST00000471500 | ENST00000477743 | *MFSD1* |
| ENST00000471500 | ENST00000486568 | *MFSD1* |
| ENST00000471500 | ENST00000491804 | *MFSD1* |
| ENST00000577606 | ENST00000583445 | *OGFOD3* |
| ENST00000577606 | ENST00000583897 | *OGFOD3* |
| ENST00000577606 | ENST00000313056 | *OGFOD3* |
| ENST00000577606 | ENST00000577495 | *OGFOD3* |
| ENST00000577606 | ENST00000329197 | *OGFOD3* |
| ENST00000586313 | ENST00000590048 | *UBA2* |
| ENST00000586313 | ENST00000592791 | *UBA2* |
| ENST00000586313 | ENST00000246548 | *UBA2* |
| ENST00000586313 | ENST00000439527 | *UBA2* |
| ENST00000586313 | ENST00000591016 | *UBA2* |
| ENST00000602708 | ENST00000602925 | *DENND4C* |
| ENST00000602708 | ENST00000434457 | *DENND4C* |
| UCSC_TCONS_00025886 | ENST00000581411 | *TP53I13* |
| UCSC_TCONS_00025886 | ENST00000580183 | *TP53I13* |
| UCSC_TCONS_00025886 | ENST00000582829 | *TP53I13* |
| UCSC_TCONS_00025886 | ENST00000583940 | *TP53I13* |
| UCSC_TCONS_00025886 | ENST00000578749 | *TP53I13* |
| UCSC_TCONS_00025886 | ENST00000301057 | *TP53I13* |
| ENST00000339092 | ENST00000409068 | *AAK1* |
| NR_045116 | ENST00000337752 | *C5ORF56* |
| NR_045116 | ENST00000378953 | *C5ORF56* |
| NR_045116 | ENST00000407797 | *C5ORF56* |
| NR_045116 | ENST00000378947 | *C5ORF56* |
| ENST00000489597 | ENST00000392048 | *SP110* |
| ENST00000489597 | ENST00000258381 | *SP110* |
| ENST00000489597 | ENST00000258382 | *SP110* |
| ENST00000489597 | ENST00000540870 | *SP110* |
| ENST00000489597 | ENST00000338556 | *SP110* |
| ENST00000489597 | ENST00000358662 | *SP110* |
| ENST00000524543 | ENST00000527813 | *TMEM41B* |
| ENST00000524543 | ENST00000533723 | *TMEM41B* |
| ENST00000524543 | ENST00000528080 | *TMEM41B* |
| NONHSAT114681 | ENST00000535237 | *GOPC* |
| NONHSAT114681 | ENST00000052569 | *GOPC* |
| NONHSAT114681 | ENST00000368498 | *GOPC* |
| ENST00000468018 | ENST00000400771 | *ATG4B* |
| ENST00000468018 | ENST00000430617 | *ATG4B* |
| ENST00000468018 | ENST00000405546 | *ATG4B* |
| ENST00000468018 | ENST00000396411 | *ATG4B* |
| ENST00000468018 | ENST00000425239 | *ATG4B* |
| ENST00000468018 | ENST00000419606 | *ATG4B* |
| ENST00000468018 | ENST00000429899 | *ATG4B* |
| ENST00000468018 | ENST00000402096 | *ATG4B* |
| ENST00000468018 | ENST00000404914 | *ATG4B* |
| ENST00000468018 | ENST00000474739 | *ATG4B* |
| NONHSAT037201 | ENST00000391611 | *PCNXL4* |
| NONHSAT037201 | ENST00000406854 | *PCNXL4* |
| NONHSAT037201 | ENST00000317623 | *PCNXL4* |
| NONHSAT037201 | ENST00000406949 | *PCNXL4* |
| ENST00000469916 | ENST00000011619 | *RANBP9* |
| ENST00000469916 | ENST00000539980 | *RANBP9* |
| ENST00000509031 | ENST00000357415 | *PPA2* |
| ENST00000509031 | ENST00000432483 | *PPA2* |
| ENST00000509031 | ENST00000348706 | *PPA2* |
| ENST00000509031 | ENST00000380004 | *PPA2* |
| ENST00000509031 | ENST00000515567 | *PPA2* |
| ENST00000509031 | ENST00000502596 | *PPA2* |
| ENST00000509031 | ENST00000504028 | *PPA2* |
| ENST00000509031 | ENST00000354147 | *PPA2* |
| ENST00000509031 | ENST00000310267 | *PPA2* |
| ENST00000509031 | ENST00000510015 | *PPA2* |
| ENST00000509031 | ENST00000341695 | *PPA2* |
| ENST00000509031 | ENST00000508518 | *PPA2* |
| ENST00000318803 | ENST00000477717 | *ST6GALNAC5* |
| ENST00000414212 | ENST00000416055 | *WDR35* |
| ENST00000414212 | ENST00000281405 | *WDR35* |
| ENST00000414212 | ENST00000453014 | *WDR35* |
| ENST00000414212 | ENST00000345530 | *WDR35* |
| ENST00000441284 | ENST00000439642 | *KIAA0226L* |
| ENST00000441284 | ENST00000378797 | *KIAA0226L* |
| ENST00000441284 | ENST00000417405 | *KIAA0226L* |
| ENST00000441284 | ENST00000322896 | *KIAA0226L* |
| ENST00000441284 | ENST00000409879 | *KIAA0226L* |
| ENST00000441284 | ENST00000378781 | *KIAA0226L* |
| ENST00000441284 | ENST00000378787 | *KIAA0226L* |
| ENST00000441284 | ENST00000378784 | *KIAA0226L* |
| ENST00000441284 | ENST00000389908 | *KIAA0226L* |
| ENST00000441284 | ENST00000534925 | *KIAA0226L* |
| ENST00000441284 | ENST00000429979 | *KIAA0226L* |
| ENST00000551694 | ENST00000266984 | *CCDC65* |
| NR_026691 | ENST00000227752 | *IL10RA* |
| NR_026691 | ENST00000541785 | *IL10RA* |
| NR_026691 | ENST00000545409 | *IL10RA* |
| ENST00000488753 | ENST00000474627 | *ATPAF2* |
| ENST00000488753 | ENST00000581698 | *ATPAF2* |
| ENST00000488753 | ENST00000585101 | *ATPAF2* |
| ENST00000488753 | ENST00000444058 | *ATPAF2* |
| ENST00000474033 | ENST00000342753 | *MXRA8* |
| ENST00000474033 | ENST00000477278 | *MXRA8* |
| ENST00000474033 | ENST00000445648 | *MXRA8* |
| ENST00000474033 | ENST00000309212 | *MXRA8* |
| ENST00000564838 | ENST00000565897 | *PHKG2* |
| ENST00000564838 | ENST00000328273 | *PHKG2* |
| ENST00000564838 | ENST00000563588 | *PHKG2* |
| ENST00000564838 | ENST00000424889 | *PHKG2* |
| ENST00000564838 | ENST00000565924 | *PHKG2* |
| ENST00000564838 | ENST00000561712 | *PHKG2* |
| NONHSAG024266 | ENST00000463384 | *PARD6G* |
| NONHSAG024266 | ENST00000353265 | *PARD6G* |
| NONHSAG024266 | ENST00000470488 | *PARD6G* |
| ENST00000525542 | ENST00000528203 | *PAK1* |
| ENST00000525542 | ENST00000278568 | *PAK1* |
| ENST00000525542 | ENST00000530617 | *PAK1* |
| ENST00000525542 | ENST00000356341 | *PAK1* |
| ENST00000525542 | ENST00000533285 | *PAK1* |
| ENST00000475348 | ENST00000448854 | *TMEM8A* |
| ENST00000475348 | ENST00000250930 | *TMEM8A* |
| ENST00000475348 | ENST00000424078 | *TMEM8A* |
| ENST00000475348 | ENST00000431232 | *TMEM8A* |
| ENST00000515113 | ENST00000382674 | *EVC* |
| ENST00000515113 | ENST00000264956 | *EVC* |
| NONHSAG028823 | ENST00000425756 | *NCK2* |
| NONHSAG028823 | ENST00000451463 | *NCK2* |
| NONHSAG028823 | ENST00000393349 | *NCK2* |
| NONHSAG028823 | ENST00000393348 | *NCK2* |
| NONHSAG028823 | ENST00000522586 | *NCK2* |
| NONHSAG028823 | ENST00000233154 | *NCK2* |
| ENST00000488747 | ENST00000371065 | *LEPROT* |
| ENST00000488747 | ENST00000406510 | *LEPR* |
| ENST00000488747 | ENST00000371060 | *LEPR* |
| ENST00000488747 | ENST00000344610 | *LEPR* |
| ENST00000488747 | ENST00000349533 | *LEPR* |
| ENST00000488747 | ENST00000371059 | *LEPR* |
| NONHSAT095934 | ENST00000361762 | *PCDH7* |
| NONHSAT095934 | ENST00000511884 | *PCDH7* |
| NONHSAT095934 | ENST00000543491 | *PCDH7* |
| ENST00000462353 | ENST00000358951 | *RAB3GAP2* |
| ENST00000495146 | ENST00000264710 | *RAB10* |
| ENST00000478470 | ENST00000262187 | *RHEB* |
| ENST00000478470 | ENST00000470370 | *RHEB* |
| ENST00000478470 | ENST00000472642 | *RHEB* |
| ENST00000478470 | ENST00000496004 | *RHEB* |
| NONHSAT103374 | ENST00000343348 | *SEMA6A* |
| NONHSAT103374 | ENST00000257414 | *SEMA6A* |
| NONHSAT103374 | ENST00000509665 | *SEMA6A* |
| ENST00000491200 | ENST00000441000 | *HNRNPH3* |
| ENST00000491200 | ENST00000354695 | *HNRNPH3* |
| ENST00000491200 | ENST00000265866 | *HNRNPH3* |
| NONHSAG010298 | ENST00000541102 | *LTBR* |
| NONHSAG010298 | ENST00000228918 | *LTBR* |
| NONHSAG010298 | ENST00000543190 | *LTBR* |
| NONHSAG010298 | ENST00000539925 | *LTBR* |
| ENST00000530200 | ENST00000526292 | *MTMR9* |
| ENST00000530200 | ENST00000221086 | *MTMR9* |
| ENST00000469390 | ENST00000338302 | *PEAR1* |
| ENST00000469390 | ENST00000455314 | *PEAR1* |
| ENST00000469390 | ENST00000292357 | *PEAR1* |
| ENST00000533777 | ENST00000528741 | *CTSH* |
| ENST00000533777 | ENST00000220166 | *CTSH* |
| ENST00000563220 | ENST00000568301 | *COMMD4* |
| ENST00000563220 | ENST00000567377 | *COMMD4* |
| ENST00000563220 | ENST00000267935 | *COMMD4* |
| ENST00000563220 | ENST00000564815 | *COMMD4* |
| ENST00000563220 | ENST00000338995 | *COMMD4* |
| ENST00000563220 | ENST00000567195 | *COMMD4* |
| ENST00000563220 | ENST00000562789 | *COMMD4* |
| NR_103998 | ENST00000369128 | *VPS45* |
| NR_103998 | ENST00000535106 | *VPS45* |
| NR_103998 | ENST00000369130 | *VPS45* |
| NR_103998 | ENST00000419023 | *VPS45* |
| ENST00000399280 | ENST00000472495 | *ZSWIM7* |
| ENST00000399280 | ENST00000486655 | *ZSWIM7* |
| ENST00000399280 | ENST00000399277 | *ZSWIM7* |
| ENST00000565580 | ENST00000544241 | *TCF4* |
| ENST00000565580 | ENST00000569357 | *TCF4* |
| ENST00000565580 | ENST00000567880 | *TCF4* |
| ENST00000565580 | ENST00000562512 | *TCF4* |
| ENST00000565580 | ENST00000356073 | *TCF4* |
| ENST00000565580 | ENST00000566286 | *TCF4* |
| ENST00000565580 | ENST00000566279 | *TCF4* |
| ENST00000565580 | ENST00000568169 | *TCF4* |
| ENST00000565580 | ENST00000564228 | *TCF4* |
| ENST00000565580 | ENST00000540999 | *TCF4* |
| ENST00000565580 | ENST00000564999 | *TCF4* |
| ENST00000565580 | ENST00000563824 | *TCF4* |
| ENST00000565580 | ENST00000565908 | *TCF4* |
| ENST00000565580 | ENST00000562543 | *TCF4* |
| ENST00000565580 | ENST00000566514 | *TCF4* |
| ENST00000565580 | ENST00000564343 | *TCF4* |
| ENST00000565580 | ENST00000563888 | *TCF4* |
| ENST00000565580 | ENST00000564403 | *TCF4* |
| ENST00000565580 | ENST00000568147 | *TCF4* |
| ENST00000565580 | ENST00000568673 | *TCF4* |
| ENST00000565580 | ENST00000568740 | *TCF4* |
| ENST00000565580 | ENST00000398339 | *TCF4* |
| ENST00000565580 | ENST00000568186 | *TCF4* |
| ENST00000565580 | ENST00000354452 | *TCF4* |
| ENST00000565580 | ENST00000561992 | *TCF4* |
| ENST00000565580 | ENST00000565018 | *TCF4* |
| ENST00000565580 | ENST00000543082 | *TCF4* |
| ENST00000565580 | ENST00000537578 | *TCF4* |
| ENST00000565580 | ENST00000562847 | *TCF4* |
| ENST00000565580 | ENST00000566777 | *TCF4* |
| ENST00000567135 | ENST00000220003 | *CSK* |
| ENST00000567135 | ENST00000569462 | *CSK* |
| ENST00000567135 | ENST00000567123 | *CSK* |
| ENST00000567135 | ENST00000309470 | *CSK* |
| ENST00000567135 | ENST00000439220 | *CSK* |
| ENST00000567135 | ENST00000567571 | *CSK* |
| NONHSAT004527 | ENST00000370267 | *DR1* |
| NONHSAT004527 | ENST00000370272 | *DR1* |
| ENST00000602860 | ENST00000602382 | *ACD* |
| ENST00000602860 | ENST00000602320 | *ACD* |
| ENST00000602860 | ENST00000219251 | *ACD* |
| ENST00000602860 | ENST00000602850 | *ACD* |
| ENST00000602860 | ENST00000393919 | *ACD* |
| ENST00000561443 | ENST00000560955 | *TRPM7* |
| ENST00000561443 | ENST00000313478 | *TRPM7* |
| ENST00000561443 | ENST00000561267 | *TRPM7* |
| NR_073478 | ENST00000368886 | *IKZF5* |
| NONHSAG000770 | ENST00000361427 | *HMGN2* |
| ENST00000476326 | ENST00000330317 | *WDR4* |
| ENST00000476326 | ENST00000398208 | *WDR4* |
| ENST00000592052 | ENST00000593068 | *TMEM259* |
| ENST00000592052 | ENST00000333175 | *TMEM259* |
| ENST00000592052 | ENST00000356663 | *TMEM259* |
| ENST00000592052 | ENST00000586285 | *TMEM259* |
| ENST00000482234 | ENST00000391846 | *SDCCAG8* |
| ENST00000482234 | ENST00000476722 | *SDCCAG8* |
| ENST00000482234 | ENST00000343783 | *SDCCAG8* |
| ENST00000482234 | ENST00000366541 | *SDCCAG8* |
| ENST00000482234 | ENST00000355875 | *SDCCAG8* |
| ENST00000482234 | ENST00000435549 | *SDCCAG8* |
| ENST00000429836 | ENST00000418828 | *SEMA4D* |
| ENST00000429836 | ENST00000540475 | *SEMA4D* |
| ENST00000429836 | ENST00000420987 | *SEMA4D* |
| ENST00000429836 | ENST00000420101 | *SEMA4D* |
| ENST00000429836 | ENST00000455551 | *SEMA4D* |
| ENST00000429836 | ENST00000422704 | *SEMA4D* |
| ENST00000429836 | ENST00000438547 | *SEMA4D* |
| ENST00000429836 | ENST00000420681 | *SEMA4D* |
| ENST00000429836 | ENST00000420670 | *SEMA4D* |
| ENST00000429836 | ENST00000339861 | *SEMA4D* |
| ENST00000429836 | ENST00000343780 | *SEMA4D* |
| ENST00000429836 | ENST00000433650 | *SEMA4D* |
| ENST00000429836 | ENST00000450295 | *SEMA4D* |
| ENST00000429836 | ENST00000356444 | *SEMA4D* |
| NR_036639 | ENST00000412288 | *YIPF1* |
| NR_036639 | ENST00000072644 | *YIPF1* |
| NR_036639 | ENST00000539954 | *YIPF1* |
| NR_036639 | ENST00000371399 | *YIPF1* |
| ENST00000542868 | ENST00000541257 | *GNB3* |
| ENST00000542868 | ENST00000537035 | *GNB3* |
| ENST00000542868 | ENST00000541978 | *GNB3* |
| ENST00000542868 | ENST00000229264 | *GNB3* |
| ENST00000542868 | ENST00000435982 | *GNB3* |
| ENST00000507655 | ENST00000509013 | *SSBP2* |
| ENST00000507655 | ENST00000505980 | *SSBP2* |
| ENST00000507655 | ENST00000512923 | *SSBP2* |
| ENST00000507655 | ENST00000504985 | *SSBP2* |
| ENST00000507655 | ENST00000515395 | *SSBP2* |
| ENST00000507655 | ENST00000509053 | *SSBP2* |
| ENST00000507655 | ENST00000514493 | *SSBP2* |
| ENST00000507655 | ENST00000320672 | *SSBP2* |
| ENST00000504875 | ENST00000511344 | *CSF1R* |
| ENST00000504875 | ENST00000286301 | *CSF1R* |
| ENST00000504875 | ENST00000543093 | *CSF1R* |
| ENST00000586001 | ENST00000544137 | *ATP6V0A1* |
| NONHSAG010162 | ENST00000589028 | *ERC1* |
| NONHSAG010162 | ENST00000543086 | *ERC1* |
| NONHSAG010162 | ENST00000397203 | *ERC1* |
| ENST00000601252 | ENST00000601403 | *TIMM50* |
| ENST00000601252 | ENST00000597666 | *TIMM50* |
| ENST00000601252 | ENST00000314349 | *TIMM50* |
| ENST00000601252 | ENST00000602028 | *TIMM50* |
| ENST00000601252 | ENST00000599794 | *TIMM50* |
| ENST00000601252 | ENST00000607714 | *TIMM50* |
| ENST00000601252 | ENST00000544017 | *TIMM50* |
| ENST00000550438 | ENST00000547079 | *OS9* |
| ENST00000548309 | ENST00000329146 | *CRIP2* |
| ENST00000548309 | ENST00000550577 | *CRIP2* |
| ENST00000548309 | ENST00000483017 | *CRIP2* |
| ENST00000548309 | ENST00000538259 | *CRIP2* |
| ENST00000524984 | ENST00000421244 | *DGKZ* |
| ENST00000524984 | ENST00000525242 | *DGKZ* |
| ENST00000524984 | ENST00000343674 | *DGKZ* |
| ENST00000524984 | ENST00000456247 | *DGKZ* |
| ENST00000524984 | ENST00000527911 | *DGKZ* |
| ENST00000524984 | ENST00000318201 | *DGKZ* |
| ENST00000524984 | ENST00000532868 | *DGKZ* |
| ENST00000524984 | ENST00000524869 | *DGKZ* |
| ENST00000524984 | ENST00000524448 | *DGKZ* |
| ENST00000524984 | ENST00000454345 | *DGKZ* |
| ENST00000524984 | ENST00000543978 | *DGKZ* |
| ENST00000524984 | ENST00000395574 | *DGKZ* |
| ENST00000524984 | ENST00000528615 | *DGKZ* |
| ENST00000599590 | ENST00000509570 | *SEPW1* |
| ENST00000599590 | ENST00000593892 | *SEPW1* |
| ENST00000599590 | ENST00000595615 | *SEPW1* |
| ENST00000599590 | ENST00000601048 | *SEPW1* |
| NONHSAT071165 | ENST00000542850 | *ACTR2* |
| NONHSAT071165 | ENST00000260641 | *ACTR2* |
| NONHSAT071165 | ENST00000377982 | *ACTR2* |
| ENST00000599668 | ENST00000602229 | *C3* |
| ENST00000599668 | ENST00000245907 | *C3* |
| ENST00000599668 | ENST00000601008 | *C3* |
| ENST00000434449 | ENST00000539229 | *ALDH3B1* |
| ENST00000434449 | ENST00000316367 | *ALDH3B1* |
| ENST00000434449 | ENST00000342456 | *ALDH3B1* |
| ENST00000434449 | ENST00000007633 | *ALDH3B1* |
| NONHSAG001167 | ENST00000425457 | *NFYC* |
| NONHSAG001167 | ENST00000447388 | *NFYC* |
| NONHSAG001167 | ENST00000456393 | *NFYC* |
| NONHSAG001167 | ENST00000427410 | *NFYC* |
| NONHSAG001167 | ENST00000372654 | *NFYC* |
| NONHSAG001167 | ENST00000453631 | *NFYC* |
| NONHSAG001167 | ENST00000534399 | *NFYC* |
| NONHSAG001167 | ENST00000372653 | *NFYC* |
| NONHSAG017158 | ENST00000416172 | *ZNF609* |
| ENST00000575069 | ENST00000570907 | *P4HB* |
| ENST00000575069 | ENST00000576380 | *P4HB* |
| ENST00000575069 | ENST00000574914 | *P4HB* |
| ENST00000575069 | ENST00000576541 | *P4HB* |
| ENST00000575069 | ENST00000573778 | *P4HB* |
| ENST00000575069 | ENST00000439918 | *P4HB* |
| ENST00000575069 | ENST00000576390 | *P4HB* |
| ENST00000575069 | ENST00000331483 | *P4HB* |
| ENST00000575069 | ENST00000571617 | *P4HB* |
| ENST00000575069 | ENST00000415593 | *P4HB* |
| ENST00000575069 | ENST00000576052 | *P4HB* |
| ENST00000522415 | ENST00000515320 | *HSD17B4* |
| ENST00000522415 | ENST00000509514 | *HSD17B4* |
| ENST00000522415 | ENST00000256216 | *HSD17B4* |
| ENST00000522415 | ENST00000513628 | *HSD17B4* |
| ENST00000522415 | ENST00000510025 | *HSD17B4* |
| ENST00000522415 | ENST00000414835 | *HSD17B4* |
| ENST00000522415 | ENST00000504811 | *HSD17B4* |
| ENST00000577487 | ENST00000581368 | *LRRC37A3* |
| ENST00000577487 | ENST00000339474 | *LRRC37A3* |
| ENST00000470769 | ENST00000413844 | *ELOVL1* |
| ENST00000470769 | ENST00000372458 | *ELOVL1* |
| ENST00000543336 | ENST00000358752 | *FUT4* |
| ENST00000543336 | ENST00000545603 | *PIWIL4* |
| ENST00000543336 | ENST00000299001 | *PIWIL4* |
| ENST00000526942 | ENST00000533628 | *RPUSD4* |
| ENST00000526942 | ENST00000298317 | *RPUSD4* |
| ENST00000526942 | ENST00000532674 | *RPUSD4* |
| ENST00000495785 | ENST00000492112 | *SRSF10* |
| ENST00000495785 | ENST00000374453 | *SRSF10* |
| ENST00000495785 | ENST00000374452 | *SRSF10* |
| ENST00000495785 | ENST00000344989 | *SRSF10* |
| ENST00000495785 | ENST00000453840 | *SRSF10* |
| ENST00000495785 | ENST00000343255 | *SRSF10* |
| ENST00000495785 | ENST00000484146 | *SRSF10* |
| ENST00000543455 | ENST00000536821 | *TMED3* |
| ENST00000543455 | ENST00000424155 | *TMED3* |
| ENST00000543455 | ENST00000299705 | *TMED3* |
| ENST00000525304 | ENST00000543966 | *ROBO3* |
| ENST00000525304 | ENST00000397801 | *ROBO3* |
| ENST00000525304 | ENST00000538940 | *ROBO3* |
| ENST00000579640 | ENST00000539849 | *SS18* |
| ENST00000579640 | ENST00000542743 | *SS18* |
| ENST00000579640 | ENST00000542420 | *SS18* |
| ENST00000579640 | ENST00000579061 | *SS18* |
| ENST00000579640 | ENST00000581021 | *SS18* |
| ENST00000579640 | ENST00000415083 | *SS18* |
| ENST00000579640 | ENST00000545952 | *SS18* |
| ENST00000579640 | ENST00000269137 | *SS18* |
| ENST00000579640 | ENST00000584083 | *SS18* |
| ENST00000480830 | ENST00000457767 | *SGSM3* |
| ENST00000480830 | ENST00000248929 | *SGSM3* |
| ENST00000480830 | ENST00000454798 | *SGSM3* |
| ENST00000480830 | ENST00000427834 | *SGSM3* |
| ENST00000528926 | ENST00000367006 | *RCOR3* |
| ENST00000528926 | ENST00000533469 | *RCOR3* |
| ENST00000528926 | ENST00000367005 | *RCOR3* |
| ENST00000528926 | ENST00000419091 | *RCOR3* |
| ENST00000528926 | ENST00000529763 | *RCOR3* |
| ENST00000528926 | ENST00000534478 | *RCOR3* |
| ENST00000528926 | ENST00000534460 | *RCOR3* |
| ENST00000528926 | ENST00000452621 | *RCOR3* |
| ENST00000592186 | ENST00000593223 | *SMAD4* |
| ENST00000592186 | ENST00000589941 | *SMAD4* |
| ENST00000592186 | ENST00000590061 | *SMAD4* |
| ENST00000592186 | ENST00000588745 | *SMAD4* |
| ENST00000592186 | ENST00000452201 | *SMAD4* |
| ENST00000592186 | ENST00000589076 | *SMAD4* |
| ENST00000592186 | ENST00000342988 | *SMAD4* |
| ENST00000592186 | ENST00000588860 | *SMAD4* |
| ENST00000592186 | ENST00000398417 | *SMAD4* |
| ENST00000592186 | ENST00000591914 | *SMAD4* |
| ENST00000507562 | ENST00000513661 | *GRPEL2* |
| ENST00000507562 | ENST00000416916 | *GRPEL2* |
| ENST00000507562 | ENST00000329271 | *GRPEL2* |
| NONHSAT037358 | ENST00000542227 | *FNTB* |
| NONHSAT037358 | ENST00000551093 | *CHURC1* |
| NONHSAT037358 | ENST00000549987 | *CHURC1-FNTB* |
| NONHSAT037358 | ENST00000447296 | *FNTB* |
| NONHSAT037358 | ENST00000551947 | *CHURC1* |
| NONHSAT037358 | ENST00000553743 | *CHURC1-FNTB* |
| ENST00000441162 | ENST00000406733 | *TBC1D22A* |
| ENST00000441162 | ENST00000337137 | *TBC1D22A* |
| ENST00000441162 | ENST00000407381 | *TBC1D22A* |
| ENST00000441162 | ENST00000355704 | *TBC1D22A* |
| ENST00000441162 | ENST00000380995 | *TBC1D22A* |
| ENST00000413686 | ENST00000407893 | *MEMO1* |
| ENST00000413686 | ENST00000426310 | *MEMO1* |
| ENST00000413686 | ENST00000295065 | *MEMO1* |
| ENST00000413686 | ENST00000404530 | *MEMO1* |
| ENST00000413686 | ENST00000379383 | *MEMO1* |
| ENST00000413686 | ENST00000437854 | *MEMO1* |
| ENST00000518622 | ENST00000597695 | *ZNF114* |
| ENST00000586994 | ENST00000264819 | *MIER2* |
| ENST00000491974 | ENST00000368102 | *C1ORF204* |
| ENST00000491974 | ENST00000368100 | *VSIG8* |
| ENST00000477116 | ENST00000557172 | *KLC1* |
| ENST00000525786 | ENST00000542662 | *CCDC82* |
| ENST00000525786 | ENST00000278520 | *CCDC82* |
| ENST00000567819 | ENST00000391982 | *CAPN10* |
| ENST00000567819 | ENST00000352879 | *CAPN10* |
| ENST00000567819 | ENST00000404753 | *CAPN10* |
| ENST00000567819 | ENST00000391984 | *CAPN10* |
| ENST00000567819 | ENST00000354082 | *CAPN10* |
| ENST00000567819 | ENST00000270364 | *CAPN10* |
| ENST00000513471 | ENST00000231338 | *C1QTNF3* |
| ENST00000513471 | ENST00000382065 | *C1QTNF3* |
| NONHSAG003930 | ENST00000367302 | *NAV1* |
| NONHSAG003930 | ENST00000593583 | *AC096677.1* |
| ENST00000467597 | ENST00000520777 | *MIB2* |
| ENST00000467597 | ENST00000518681 | *MIB2* |
| ENST00000467597 | ENST00000360522 | *MIB2* |
| ENST00000467597 | ENST00000378710 | *MIB2* |
| ENST00000467597 | ENST00000514234 | *MIB2* |
| ENST00000467597 | ENST00000510793 | *MIB2* |
| ENST00000467597 | ENST00000504599 | *MIB2* |
| ENST00000467597 | ENST00000378712 | *MIB2* |
| ENST00000467597 | ENST00000378708 | *MIB2* |
| ENST00000467597 | ENST00000505820 | *MIB2* |
| ENST00000467597 | ENST00000355826 | *MIB2* |
| ENST00000467597 | ENST00000357210 | *MIB2* |
| ENST00000467597 | ENST00000503789 | *MIB2* |
| ENST00000569703 | ENST00000394858 | *TGFB1I1* |
| ENST00000569703 | ENST00000565360 | *TGFB1I1* |
| ENST00000569703 | ENST00000361773 | *TGFB1I1* |
| ENST00000569703 | ENST00000567607 | *TGFB1I1* |
| ENST00000569703 | ENST00000562566 | *TGFB1I1* |
| ENST00000569703 | ENST00000394863 | *TGFB1I1* |
| ENST00000569703 | ENST00000565454 | *TGFB1I1* |
| ENST00000514137 | ENST00000323146 | *SLC35A4* |
| ENST00000514137 | ENST00000514199 | *SLC35A4* |
| ENST00000483110 | ENST00000539042 | *DDAH1* |
| ENST00000483110 | ENST00000426972 | *DDAH1* |
| ENST00000483110 | ENST00000542148 | *DDAH1* |
| ENST00000483110 | ENST00000535924 | *DDAH1* |
| ENST00000483110 | ENST00000284031 | *DDAH1* |
| ENST00000579081 | ENST00000468273 | *NF1* |
| ENST00000579081 | ENST00000356175 | *NF1* |
| ENST00000579081 | ENST00000358273 | *NF1* |
| ENST00000579081 | ENST00000489712 | *NF1* |
| ENST00000579081 | ENST00000444181 | *NF1* |
| ENST00000579081 | ENST00000456735 | *NF1* |
| ENST00000579081 | ENST00000431387 | *NF1* |
| ENST00000579081 | ENST00000417592 | *NF1* |
| NONHSAG022462 | ENST00000583211 | *LIMD2* |
| NONHSAG022462 | ENST00000584645 | *LIMD2* |
| NONHSAG022462 | ENST00000578061 | *LIMD2* |
| NONHSAG022462 | ENST00000578993 | *LIMD2* |
| NONHSAG022462 | ENST00000578402 | *LIMD2* |
| NONHSAG022462 | ENST00000259006 | *LIMD2* |
| NONHSAG022462 | ENST00000582055 | *LIMD2* |
| ENST00000414218 | ENST00000353442 | *LMBR1* |
| ENST00000414218 | ENST00000540390 | *LMBR1* |
| ENST00000414218 | ENST00000359422 | *LMBR1* |
| ENST00000414218 | ENST00000415428 | *LMBR1* |
| ENST00000414218 | ENST00000354505 | *LMBR1* |
| NONHSAT141684 | ENST00000563197 | *INO80E* |
| NONHSAT141684 | ENST00000567705 | *INO80E* |
| NONHSAT141684 | ENST00000562291 | *INO80E* |
| NONHSAT141684 | ENST00000304516 | *INO80E* |
| NONHSAT077965 | ENST00000305784 | *DTYMK* |
| ENST00000463972 | ENST00000444757 | *SLC39A7* |
| ENST00000463972 | ENST00000374677 | *SLC39A7* |
| ENST00000463972 | ENST00000374675 | *SLC39A7* |
| ENST00000514331 | ENST00000425175 | *SLC4A4* |
| ENST00000514331 | ENST00000351898 | *SLC4A4* |
| ENST00000514331 | ENST00000340595 | *SLC4A4* |
| ENST00000514331 | ENST00000264485 | *SLC4A4* |
| ENST00000514331 | ENST00000512686 | *SLC4A4* |
| ENST00000496700 | ENST00000392531 | *CRIP1* |
| ENST00000496700 | ENST00000409393 | *CRIP1* |
| ENST00000496700 | ENST00000330233 | *CRIP1* |
| ENST00000590563 | ENST00000591247 | *LSM12* |
| ENST00000590563 | ENST00000293406 | *LSM12* |
| ENST00000590563 | ENST00000585388 | *LSM12* |
| NONHSAG045265 | ENST00000337147 | *EZR* |
| NONHSAG045265 | ENST00000367075 | *EZR* |
| NONHSAG045265 | ENST00000392177 | *EZR* |
| ENST00000537754 | ENST00000540212 | *ASB8* |
| ENST00000537754 | ENST00000535988 | *ASB8* |
| ENST00000537754 | ENST00000535055 | *ASB8* |
| ENST00000537754 | ENST00000317697 | *ASB8* |
| ENST00000537754 | ENST00000536549 | *ASB8* |
| ENST00000537754 | ENST00000536953 | *ASB8* |
| ENST00000537754 | ENST00000539503 | *ASB8* |
| ENST00000537754 | ENST00000539528 | *ASB8* |
| ENST00000537754 | ENST00000540782 | *ASB8* |
| ENST00000537754 | ENST00000536071 | *ASB8* |
| ENST00000537754 | ENST00000545791 | *ASB8* |
| NONHSAT046796 | ENST00000568588 | *RPL4* |
| NONHSAT046796 | ENST00000569696 | *RPL4* |
| NONHSAT046796 | ENST00000307961 | *RPL4* |
| ENST00000517335 | ENST00000313708 | *EBF1* |
| ENST00000517335 | ENST00000517373 | *EBF1* |
| ENST00000517335 | ENST00000380654 | *EBF1* |
| ENST00000513439 | ENST00000512217 | *MTRR* |
| ENST00000513439 | ENST00000514220 | *MTRR* |
| ENST00000513439 | ENST00000506877 | *MTRR* |
| ENST00000513439 | ENST00000440940 | *MTRR* |
| ENST00000513439 | ENST00000341013 | *MTRR* |
| ENST00000513439 | ENST00000264668 | *MTRR* |
| ENST00000513439 | ENST00000502550 | *MTRR* |
| ENST00000512281 | ENST00000539542 | *DMXL1* |
| ENST00000512281 | ENST00000311085 | *DMXL1* |
| ENST00000568495 | ENST00000219172 | *CENPT* |
| ENST00000568495 | ENST00000562787 | *CENPT* |
| ENST00000568495 | ENST00000566758 | *CENPT* |
| ENST00000568495 | ENST00000440851 | *CENPT* |
| ENST00000568495 | ENST00000564817 | *CENPT* |
| ENST00000486484 | ENST00000305997 | *MBOAT2* |
| ENST00000486484 | ENST00000462696 | *MBOAT2* |
| ENST00000482760 | ENST00000376729 | *WDR13* |
| ENST00000482760 | ENST00000218056 | *WDR13* |
| ENST00000484166 | ENST00000264266 | *MFSD1* |
| ENST00000484166 | ENST00000392813 | *MFSD1* |
| ENST00000484166 | ENST00000415822 | *MFSD1* |
| ENST00000484166 | ENST00000482835 | *MFSD1* |
| ENST00000484166 | ENST00000465739 | *MFSD1* |
| ENST00000484166 | ENST00000474670 | *MFSD1* |
| ENST00000484166 | ENST00000491804 | *MFSD1* |
| ENST00000484166 | ENST00000477743 | *MFSD1* |
| ENST00000484166 | ENST00000486568 | *MFSD1* |
| ENST00000397742 | ENST00000355684 | *ZNF44* |
| ENST00000397742 | ENST00000356109 | *ZNF44* |
| ENST00000397742 | ENST00000426973 | *ZNF44* |
| ENST00000464887 | ENST00000377526 | *AUP1* |
| NR_028025 | ENST00000534224 | *CREBZF* |
| NR_028025 | ENST00000398294 | *CREBZF* |
| NR_028025 | ENST00000527447 | *CREBZF* |
| NONHSAT100917 | ENST00000265070 | *GOLPH3* |
| ENST00000468831 | ENST00000457476 | *TANK* |
| ENST00000468831 | ENST00000403609 | *TANK* |
| ENST00000468831 | ENST00000405852 | *TANK* |
| ENST00000468831 | ENST00000259075 | *TANK* |
| ENST00000468831 | ENST00000437623 | *TANK* |
| ENST00000468831 | ENST00000456358 | *TANK* |
| ENST00000468831 | ENST00000432002 | *TANK* |
| ENST00000468831 | ENST00000440506 | *TANK* |
| ENST00000468831 | ENST00000406287 | *TANK* |
| ENST00000468831 | ENST00000392749 | *TANK* |
| ENST00000468831 | ENST00000429217 | *TANK* |
| ENST00000468831 | ENST00000402568 | *TANK* |
| ENST00000478738 | ENST00000256722 | *CMPK2* |
| ENST00000478738 | ENST00000404168 | *CMPK2* |
| ENST00000478738 | ENST00000458098 | *CMPK2* |
| ENST00000484795 | ENST00000423703 | *ING4* |
| ENST00000484795 | ENST00000446105 | *ING4* |
| ENST00000484795 | ENST00000341550 | *ING4* |
| ENST00000484795 | ENST00000467678 | *ING4* |
| ENST00000484795 | ENST00000396807 | *ING4* |
| ENST00000484795 | ENST00000412586 | *ING4* |
| ENST00000484795 | ENST00000493873 | *ING4* |
| ENST00000484795 | ENST00000444704 | *ING4* |
| ENST00000497106 | ENST00000408019 | *USP54* |
| ENST00000497106 | ENST00000413442 | *USP54* |
| ENST00000497106 | ENST00000319786 | *USP54* |
| ENST00000497106 | ENST00000422491 | *USP54* |
| ENST00000497106 | ENST00000451492 | *USP54* |
| ENST00000497106 | ENST00000394811 | *USP54* |
| ENST00000497106 | ENST00000339859 | *USP54* |
| ENST00000497106 | ENST00000428547 | *USP54* |
| ENST00000559465 | ENST00000318424 | *CD276* |
| ENST00000559465 | ENST00000564751 | *CD276* |
| ENST00000559465 | ENST00000561213 | *CD276* |
| ENST00000559465 | ENST00000318443 | *CD276* |
| ENST00000559465 | ENST00000537340 | *CD276* |
| ENST00000559465 | ENST00000561176 | *CD276* |
| NONHSAT091589 | ENST00000544464 | *ZNF148* |
| NONHSAT091589 | ENST00000360647 | *ZNF148* |
| NONHSAT091589 | ENST00000492394 | *ZNF148* |
| NONHSAT091589 | ENST00000468369 | *ZNF148* |
| NONHSAT091589 | ENST00000484491 | *ZNF148* |
| NONHSAT091589 | ENST00000485866 | *ZNF148* |
| NONHSAT091589 | ENST00000423114 | *SLC12A8* |
| ENST00000491781 | ENST00000348849 | *RBMS1* |
| ENST00000491781 | ENST00000409075 | *RBMS1* |
| ENST00000491781 | ENST00000409972 | *RBMS1* |
| ENST00000491781 | ENST00000428519 | *RBMS1* |
| ENST00000491781 | ENST00000392753 | *RBMS1* |
| ENST00000491781 | ENST00000409289 | *RBMS1* |
| ENST00000603043 | ENST00000422785 | *CDCA3* |
| ENST00000531921 | ENST00000533439 | *EIF3M* |
| ENST00000531921 | ENST00000526267 | *EIF3M* |
| ENST00000531921 | ENST00000531120 | *EIF3M* |
| ENST00000531921 | ENST00000524896 | *EIF3M* |
| ENST00000531921 | ENST00000323213 | *EIF3M* |
| ENST00000449313 | ENST00000336715 | *ZNF687* |
| ENST00000449313 | ENST00000443959 | *ZNF687* |
| ENST00000449313 | ENST00000324048 | *ZNF687* |
| ENST00000449313 | ENST00000436614 | *ZNF687* |
| ENST00000449313 | ENST00000368879 | *ZNF687* |
| ENST00000449313 | ENST00000426871 | *ZNF687* |
| ENST00000481149 | ENST00000463569 | *CDC14B* |
| ENST00000481149 | ENST00000375236 | *CDC14B* |
| ENST00000481149 | ENST00000375240 | *CDC14B* |
| ENST00000481149 | ENST00000375242 | *CDC14B* |
| ENST00000481149 | ENST00000375241 | *CDC14B* |
| ENST00000481149 | ENST00000265659 | *CDC14B* |
| ENST00000562626 | ENST00000348245 | *CLK3* |
| ENST00000562626 | ENST00000563842 | *CLK3* |
| ENST00000562626 | ENST00000566926 | *CLK3* |
| ENST00000562626 | ENST00000395066 | *CLK3* |
| ENST00000562626 | ENST00000352989 | *CLK3* |
| ENST00000562626 | ENST00000345005 | *CLK3* |
| ENST00000562626 | ENST00000563418 | *CLK3* |
| ENST00000462030 | ENST00000460120 | *HPS3* |
| ENST00000462030 | ENST00000296051 | *HPS3* |
| ENST00000571307 | ENST00000269280 | *NLRP1* |
| ENST00000571307 | ENST00000262467 | *NLRP1* |
| ENST00000571307 | ENST00000572272 | *NLRP1* |
| ENST00000571307 | ENST00000577119 | *NLRP1* |
| ENST00000571307 | ENST00000345221 | *NLRP1* |
| ENST00000571307 | ENST00000576905 | *NLRP1* |
| ENST00000571307 | ENST00000354411 | *NLRP1* |
| ENST00000533649 | ENST00000527990 | *DNHD1* |
| ENST00000533649 | ENST00000254579 | *DNHD1* |
| ENST00000468355 | ENST00000424750 | *SLC23A2* |
| ENST00000468355 | ENST00000379333 | *SLC23A2* |
| ENST00000468355 | ENST00000423430 | *SLC23A2* |
| ENST00000468355 | ENST00000338244 | *SLC23A2* |
| ENST00000506172 | ENST00000397411 | *TSPAN4* |
| ENST00000506172 | ENST00000409531 | *TSPAN4* |
| ENST00000506172 | ENST00000525334 | *TSPAN4* |
| ENST00000506172 | ENST00000397397 | *TSPAN4* |
| ENST00000506172 | ENST00000346501 | *TSPAN4* |
| ENST00000506172 | ENST00000527644 | *TSPAN4* |
| ENST00000506172 | ENST00000530404 | *TSPAN4* |
| ENST00000506172 | ENST00000397406 | *TSPAN4* |
| ENST00000506172 | ENST00000409543 | *TSPAN4* |
| ENST00000506172 | ENST00000397408 | *TSPAN4* |
| ENST00000506172 | ENST00000397396 | *TSPAN4* |
| ENST00000506172 | ENST00000397404 | *TSPAN4* |
| ENST00000506172 | ENST00000525201 | *TSPAN4* |
| ENST00000506172 | ENST00000532375 | *TSPAN4* |
| ENST00000417835 | ENST00000435454 | *NR2C2* |
| ENST00000417835 | ENST00000413118 | *NR2C2* |
| ENST00000417835 | ENST00000323373 | *NR2C2* |
| ENST00000417835 | ENST00000425241 | *NR2C2* |
| ENST00000569888 | ENST00000258201 | *FHOD1* |
| ENST00000477136 | ENST00000323064 | *AGBL5* |
| ENST00000477136 | ENST00000451003 | *AGBL5* |
| ENST00000477136 | ENST00000437006 | *AGBL5* |
| ENST00000477136 | ENST00000453161 | *AGBL5* |
| ENST00000477136 | ENST00000360131 | *AGBL5* |
| ENST00000477136 | ENST00000421915 | *AGBL5* |
| NONHSAT096409 | ENST00000507166 | *FIP1L1* |
| NONHSAT015230 | ENST00000372270 | *PLAC9* |
| NONHSAT015230 | ENST00000372263 | *PLAC9* |
| ENST00000238671 | ENST00000334220 | *DLST* |
| ENST00000238671 | ENST00000554806 | *DLST* |
| ENST00000238671 | ENST00000334212 | *DLST* |
| ENST00000460191 | ENST00000436063 | *DNTTIP2* |
| ENST00000460191 | ENST00000528680 | *DNTTIP2* |
| NONHSAG037344 | ENST00000500728 | *LRPAP1* |
| ENST00000426939 | ENST00000397287 | *APOL3* |
| ENST00000426939 | ENST00000531095 | *APOL3* |
| ENST00000426939 | ENST00000349314 | *APOL3* |
| ENST00000426939 | ENST00000424878 | *APOL3* |
| ENST00000426939 | ENST00000397293 | *APOL3* |
| ENST00000426939 | ENST00000361710 | *APOL3* |
| ENST00000528529 | ENST00000526171 | *MRPL49* |
| ENST00000528529 | ENST00000533943 | *MRPL49* |
| ENST00000528529 | ENST00000279242 | *MRPL49* |
| ENST00000528529 | ENST00000531705 | *MRPL49* |
| ENST00000528529 | ENST00000534078 | *MRPL49* |
| ENST00000522282 | ENST00000542911 | *YTHDF3* |
| ENST00000522282 | ENST00000539294 | *YTHDF3* |
| ENST00000522282 | ENST00000517371 | *YTHDF3* |
| ENST00000466319 | ENST00000422373 | *FLNA* |
| ENST00000466319 | ENST00000369850 | *FLNA* |
| ENST00000466319 | ENST00000344736 | *FLNA* |
| ENST00000466319 | ENST00000360319 | *FLNA* |
| ENST00000466319 | ENST00000369856 | *FLNA* |
| ENST00000412966 | ENST00000443878 | *RAB5A* |
| ENST00000412966 | ENST00000422242 | *RAB5A* |
| ENST00000412966 | ENST00000273047 | *RAB5A* |
| ENST00000525782 | ENST00000323213 | *EIF3M* |
| ENST00000525782 | ENST00000524896 | *EIF3M* |
| ENST00000525782 | ENST00000533439 | *EIF3M* |
| ENST00000525782 | ENST00000531120 | *EIF3M* |
| ENST00000525782 | ENST00000526267 | *EIF3M* |
| ENST00000561342 | ENST00000557894 | *IRF9* |
| ENST00000561342 | ENST00000559284 | *IRF9* |
| ENST00000561342 | ENST00000324076 | *IRF9* |
| ENST00000561342 | ENST00000396864 | *IRF9* |
| ENST00000561342 | ENST00000560275 | *IRF9* |
| ENST00000491402 | ENST00000395859 | *VCPKMT* |
| ENST00000491402 | ENST00000395860 | *VCPKMT* |
| NONHSAT136354 | ENST00000498004 | *CA5B* |
| ENST00000477262 | ENST00000405510 | *SUN2* |
| ENST00000477262 | ENST00000411587 | *SUN2* |
| ENST00000477262 | ENST00000406622 | *SUN2* |
| ENST00000477262 | ENST00000216064 | *SUN2* |
| ENST00000477262 | ENST00000455125 | *SUN2* |
| ENST00000477262 | ENST00000405018 | *SUN2* |
| ENST00000587872 | ENST00000585744 | *BCAS3* |
| ENST00000587872 | ENST00000407086 | *BCAS3* |
| ENST00000587872 | ENST00000588874 | *BCAS3* |
| ENST00000587872 | ENST00000390652 | *BCAS3* |
| ENST00000339569 | ENST00000579565 | *MSL1* |
| ENST00000339569 | ENST00000398532 | *MSL1* |
| ENST00000339569 | ENST00000578648 | *MSL1* |
| ENST00000584977 | ENST00000269445 | *DYM* |
| ENST00000584977 | ENST00000583353 | *DYM* |
| ENST00000584977 | ENST00000442713 | *DYM* |
| ENST00000519705 | ENST00000521576 | *HGSNAT* |
| ENST00000519705 | ENST00000458501 | *HGSNAT* |
| ENST00000519705 | ENST00000297798 | *HGSNAT* |
| ENST00000519705 | ENST00000379644 | *HGSNAT* |
| ENST00000519705 | ENST00000524016 | *HGSNAT* |
| ENST00000468758 | ENST00000281923 | *MGAT5* |
| ENST00000468758 | ENST00000409645 | *MGAT5* |
| ENST00000493376 | ENST00000430322 | *BCS1L* |
| ENST00000493376 | ENST00000439945 | *BCS1L* |
| ENST00000493376 | ENST00000443791 | *BCS1L* |
| ENST00000493376 | ENST00000392111 | *BCS1L* |
| ENST00000493376 | ENST00000423377 | *BCS1L* |
| ENST00000493376 | ENST00000428880 | *BCS1L* |
| ENST00000493376 | ENST00000456050 | *BCS1L* |
| ENST00000493376 | ENST00000392110 | *BCS1L* |
| ENST00000493376 | ENST00000359273 | *BCS1L* |
| ENST00000493376 | ENST00000431802 | *BCS1L* |
| ENST00000493376 | ENST00000412366 | *BCS1L* |
| ENST00000493376 | ENST00000392109 | *BCS1L* |
| ENST00000545307 | ENST00000254286 | *ACTR10* |
| ENST00000545307 | ENST00000554642 | *ACTR10* |
| ENST00000497061 | ENST00000360817 | *C1S* |
| ENST00000497061 | ENST00000328916 | *C1S* |
| ENST00000497061 | ENST00000402681 | *C1S* |
| ENST00000497061 | ENST00000406697 | *C1S* |
| NONHSAT059127 | ENST00000589869 | *ATP5A1* |
| NONHSAT059127 | ENST00000590324 | *ATP5A1* |
| NONHSAT059127 | ENST00000592989 | *ATP5A1* |
| ENST00000525717 | ENST00000529640 | *UBXN1* |
| ENST00000525717 | ENST00000533000 | *UBXN1* |
| ENST00000525717 | ENST00000534176 | *UBXN1* |
| ENST00000525717 | ENST00000294119 | *UBXN1* |
| ENST00000525717 | ENST00000301935 | *UBXN1* |
| ENST00000479210 | ENST00000395925 | *GLI3* |
| ENST00000479210 | ENST00000448703 | *GLI3* |
| ENST00000465101 | ENST00000338302 | *PEAR1* |
| ENST00000465101 | ENST00000292357 | *PEAR1* |
| ENST00000544188 | ENST00000262225 | *TMED2* |
| ENST00000544188 | ENST00000509052 | *TMED2* |
| ENST00000544188 | ENST00000438031 | *TMED2* |
| ENST00000496844 | ENST00000449349 | *THNSL2* |
| ENST00000496844 | ENST00000324166 | *THNSL2* |
| ENST00000496844 | ENST00000358591 | *THNSL2* |
| ENST00000496844 | ENST00000402102 | *THNSL2* |
| ENST00000496844 | ENST00000377254 | *THNSL2* |
| ENST00000496844 | ENST00000343544 | *THNSL2* |
| ENST00000475954 | ENST00000356080 | *ADD3* |
| ENST00000475954 | ENST00000360162 | *ADD3* |
| ENST00000475954 | ENST00000277900 | *ADD3* |
| NR_027991 | ENST00000606794 | *APLNR* |
| ENST00000564734 | ENST00000261609 | *HERC2* |
| NONHSAG008815 | ENST00000533075 | *NDUFV1* |
| NONHSAG008815 | ENST00000529867 | *NDUFV1* |
| NONHSAG008815 | ENST00000529927 | *NDUFV1* |
| NONHSAG008815 | ENST00000532303 | *NDUFV1* |
| NONHSAG008815 | ENST00000530638 | *NDUFV1* |
| NONHSAG008815 | ENST00000528328 | *NDUFV1* |
| NONHSAG008815 | ENST00000532244 | *NDUFV1* |
| NONHSAG008815 | ENST00000532343 | *NDUFV1* |
| NONHSAG008815 | ENST00000528314 | *NDUFV1* |
| NONHSAG008815 | ENST00000322776 | *NDUFV1* |
| NONHSAG008815 | ENST00000415352 | *NDUFV1* |
| NR_040047 | ENST00000381812 | *SDCBP2* |
| ENST00000482969 | ENST00000395778 | *MAPK12* |
| ENST00000482969 | ENST00000215659 | *MAPK12* |
| ENST00000482969 | ENST00000395780 | *MAPK12* |
| ENST00000520655 | ENST00000416505 | *IKBKB* |
| ENST00000520655 | ENST00000518983 | *IKBKB* |
| ENST00000520655 | ENST00000522147 | *IKBKB* |
| ENST00000520655 | ENST00000519735 | *IKBKB* |
| ENST00000520655 | ENST00000520835 | *IKBKB* |
| ENST00000520655 | ENST00000379708 | *IKBKB* |
| ENST00000520655 | ENST00000520810 | *IKBKB* |
| NR_033192 | ENST00000256151 | *CCDC59* |
| NR_033192 | ENST00000552377 | *CCDC59* |
| ENST00000489398 | ENST00000432587 | *DCAF6* |
| ENST00000489398 | ENST00000367840 | *DCAF6* |
| ENST00000489398 | ENST00000312263 | *DCAF6* |
| ENST00000489398 | ENST00000367843 | *DCAF6* |
| ENST00000483804 | ENST00000367993 | *NDUFS2* |
| ENST00000483804 | ENST00000476409 | *NDUFS2* |
| ENST00000483804 | ENST00000392179 | *NDUFS2* |
| ENST00000495874 | ENST00000372526 | *LEPRE1* |
| ENST00000495874 | ENST00000447502 | *LEPRE1* |
| ENST00000495874 | ENST00000296388 | *LEPRE1* |
| ENST00000495874 | ENST00000236040 | *LEPRE1* |
| ENST00000495874 | ENST00000397054 | *LEPRE1* |
| ENST00000503795 | ENST00000265080 | *RASGRF2* |
| ENST00000592031 | ENST00000248070 | *EPS15L1* |
| ENST00000592031 | ENST00000599790 | *EPS15L1* |
| ENST00000592031 | ENST00000455140 | *EPS15L1* |
| ENST00000592031 | ENST00000594851 | *EPS15L1* |
| ENST00000592031 | ENST00000602151 | *EPS15L1* |
| ENST00000592031 | ENST00000602009 | *EPS15L1* |
| ENST00000592031 | ENST00000597937 | *EPS15L1* |
| ENST00000592031 | ENST00000535753 | *EPS15L1* |
| ENST00000592031 | ENST00000594975 | *EPS15L1* |
| ENST00000465146 | ENST00000344720 | *AK5* |
| ENST00000465146 | ENST00000354567 | *AK5* |
| ENST00000447929 | ENST00000421103 | *GUSB* |
| ENST00000447929 | ENST00000345660 | *GUSB* |
| ENST00000447929 | ENST00000304895 | *GUSB* |
| ENST00000591743 | ENST00000270460 | *EPN1* |
| ENST00000591743 | ENST00000411543 | *EPN1* |
| ENST00000591743 | ENST00000085079 | *EPN1* |
| ENST00000464161 | ENST00000355725 | *THOC2* |
| ENST00000464161 | ENST00000438358 | *THOC2* |
| ENST00000464161 | ENST00000491737 | *THOC2* |
| ENST00000464161 | ENST00000245838 | *THOC2* |
| ENST00000394321 | ENST00000601003 | *MCOLN1* |
| ENST00000394321 | ENST00000599334 | *MCOLN1* |
| ENST00000394321 | ENST00000264079 | *MCOLN1* |
| ENST00000372547 | ENST00000462307 | *SNX21* |
| ENST00000372547 | ENST00000342644 | *SNX21* |
| ENST00000372547 | ENST00000372541 | *SNX21* |
| ENST00000372547 | ENST00000491381 | *SNX21* |
| ENST00000372547 | ENST00000372542 | *SNX21* |
| ENST00000552306 | ENST00000397792 | *VEZT* |
| ENST00000552306 | ENST00000261219 | *VEZT* |
| ENST00000552306 | ENST00000436874 | *VEZT* |
| ENST00000480814 | ENST00000473887 | *B4GALT4* |
| ENST00000480814 | ENST00000470111 | *B4GALT4* |
| ENST00000480814 | ENST00000393765 | *B4GALT4* |
| ENST00000480814 | ENST00000475803 | *B4GALT4* |
| ENST00000480814 | ENST00000459778 | *B4GALT4* |
| ENST00000480814 | ENST00000459820 | *B4GALT4* |
| ENST00000480814 | ENST00000483209 | *B4GALT4* |
| ENST00000480814 | ENST00000491906 | *B4GALT4* |
| ENST00000480814 | ENST00000359213 | *B4GALT4* |
| ENST00000480814 | ENST00000467604 | *B4GALT4* |
| ENST00000480814 | ENST00000479150 | *B4GALT4* |
| ENST00000480814 | ENST00000471675 | *B4GALT4* |
| ENST00000480814 | ENST00000493932 | *B4GALT4* |
| ENST00000482558 | ENST00000409604 | *SNX13* |
| ENST00000482558 | ENST00000409389 | *SNX13* |
| ENST00000482558 | ENST00000428135 | *SNX13* |
| ENST00000489152 | ENST00000442235 | *TTC31* |
| ENST00000489152 | ENST00000414247 | *TTC31* |
| ENST00000489152 | ENST00000410003 | *TTC31* |
| ENST00000489152 | ENST00000233623 | *TTC31* |
| NONHSAT134849 | ENST00000373203 | *ENG* |
| NONHSAT134849 | ENST00000344849 | *ENG* |
| ENST00000506001 | ENST00000323594 | *PHYKPL* |
| ENST00000506001 | ENST00000476170 | *PHYKPL* |
| ENST00000506001 | ENST00000308158 | *PHYKPL* |
| ENST00000485596 | ENST00000310298 | *PDE8A* |
| ENST00000485596 | ENST00000339708 | *PDE8A* |
| ENST00000485596 | ENST00000394553 | *PDE8A* |
| ENST00000485596 | ENST00000557957 | *PDE8A* |
| ENST00000463622 | ENST00000541123 | *SCFD1* |
| ENST00000463622 | ENST00000458591 | *SCFD1* |
| ENST00000463622 | ENST00000396629 | *SCFD1* |
| ENST00000463622 | ENST00000553693 | *SCFD1* |
| ENST00000463622 | ENST00000421551 | *SCFD1* |
| ENST00000463622 | ENST00000469043 | *SCFD1* |
| ENST00000463622 | ENST00000544052 | *SCFD1* |
| ENST00000463622 | ENST00000557076 | *SCFD1* |
| ENST00000571832 | ENST00000328666 | *SIRT7* |
| ENST00000571832 | ENST00000572902 | *SIRT7* |
| ENST00000490123 | ENST00000587340 | *ZSCAN5A* |
| ENST00000573187 | ENST00000396501 | *MPDU1* |
| ENST00000573187 | ENST00000585217 | *MPDU1* |
| ENST00000573187 | ENST00000582151 | *MPDU1* |
| ENST00000573187 | ENST00000423172 | *MPDU1* |
| ENST00000573187 | ENST00000581380 | *MPDU1* |
| ENST00000573187 | ENST00000579445 | *MPDU1* |
| ENST00000573187 | ENST00000250124 | *MPDU1* |
| ENST00000573187 | ENST00000584378 | *MPDU1* |
| ENST00000560191 | ENST00000267811 | *TCF12* |
| ENST00000560191 | ENST00000343827 | *TCF12* |
| ENST00000560191 | ENST00000560948 | *TCF12* |
| ENST00000560191 | ENST00000543579 | *TCF12* |
| ENST00000560191 | ENST00000560836 | *TCF12* |
| ENST00000560191 | ENST00000557843 | *TCF12* |
| ENST00000560191 | ENST00000333725 | *TCF12* |
| ENST00000560191 | ENST00000452095 | *TCF12* |
| ENST00000560191 | ENST00000559710 | *TCF12* |
| ENST00000560191 | ENST00000559609 | *TCF12* |
| ENST00000560191 | ENST00000559703 | *TCF12* |
| ENST00000560191 | ENST00000537840 | *TCF12* |
| ENST00000560191 | ENST00000438423 | *TCF12* |
| UCSC_TCONS_l2_00014331 | ENST00000305784 | *DTYMK* |
| UCSC_TCONS_l2_00014331 | ENST00000445261 | *DTYMK* |
| NONHSAG009725 | ENST00000540028 | *PCSK7* |
| NONHSAG009725 | ENST00000320934 | *PCSK7* |
| ENST00000505979 | ENST00000358595 | *ARNT* |
| ENST00000505979 | ENST00000515192 | *ARNT* |
| ENST00000505979 | ENST00000354396 | *ARNT* |
| ENST00000505979 | ENST00000505755 | *ARNT* |
| NR_026571 | ENST00000527626 | *NOX4* |
| NR_026571 | ENST00000535633 | *NOX4* |
| NR_026571 | ENST00000532825 | *NOX4* |
| NR_026571 | ENST00000542487 | *NOX4* |
| NR_026571 | ENST00000525196 | *NOX4* |
| NR_026571 | ENST00000375979 | *NOX4* |
| NR_026571 | ENST00000528341 | *NOX4* |
| NR_026571 | ENST00000534731 | *NOX4* |
| NR_026571 | ENST00000531342 | *NOX4* |
| NR_026571 | ENST00000343727 | *NOX4* |
| NR_026571 | ENST00000424319 | *NOX4* |
| NR_026571 | ENST00000527956 | *NOX4* |
| NR_026571 | ENST00000263317 | *NOX4* |
| NR_026571 | ENST00000413594 | *NOX4* |
| NR_026571 | ENST00000393282 | *NOX4* |
| ENST00000543992 | ENST00000389032 | *STK38L* |
| ENST00000543992 | ENST00000539577 | *STK38L* |
| ENST00000477070 | ENST00000451251 | *ZNF692* |
| ENST00000477070 | ENST00000366471 | *ZNF692* |
| ENST00000477070 | ENST00000427146 | *ZNF692* |
| ENST00000477070 | ENST00000306601 | *ZNF692* |
| ENST00000477070 | ENST00000366469 | *ZNF692* |
| ENST00000477070 | ENST00000496231 | *ZNF692* |
| ENST00000477070 | ENST00000476503 | *ZNF692* |
| ENST00000559758 | ENST00000559386 | *ETFA* |
| ENST00000559758 | ENST00000560595 | *ETFA* |
| ENST00000559758 | ENST00000433983 | *ETFA* |
| ENST00000559758 | ENST00000560345 | *ETFA* |
| ENST00000559758 | ENST00000559602 | *ETFA* |
| ENST00000559758 | ENST00000557943 | *ETFA* |
| ENST00000559758 | ENST00000560726 | *ETFA* |
| ENST00000559758 | ENST00000559973 | *ETFA* |
| NONHSAT128404 | ENST00000378204 | *EXT1* |
| NONHSAT128404 | ENST00000436216 | *EXT1* |
| ENST00000466525 | ENST00000229239 | *GAPDH* |
| ENST00000466525 | ENST00000396859 | *GAPDH* |
| ENST00000466525 | ENST00000396858 | *GAPDH* |
| ENST00000466525 | ENST00000396856 | *GAPDH* |
| ENST00000466525 | ENST00000396861 | *GAPDH* |
| ENST00000592905 | ENST00000589381 | *ERCC1* |
| ENST00000592905 | ENST00000591636 | *ERCC1* |
| ENST00000592905 | ENST00000013807 | *ERCC1* |
| ENST00000592905 | ENST00000592083 | *ERCC1* |
| ENST00000592905 | ENST00000423698 | *ERCC1* |
| ENST00000592905 | ENST00000300853 | *ERCC1* |
| ENST00000592905 | ENST00000340192 | *ERCC1* |
| ENST00000592905 | ENST00000592444 | *ERCC1* |
| ENST00000592905 | ENST00000590701 | *ERCC1* |
| ENST00000592905 | ENST00000589165 | *ERCC1* |
| ENST00000592905 | ENST00000589214 | *ERCC1* |
| ENST00000592905 | ENST00000592023 | *ERCC1* |
| ENST00000579053 | ENST00000251101 | *ENOSF1* |
| ENST00000579053 | ENST00000383578 | *ENOSF1* |
| ENST00000579053 | ENST00000340116 | *ENOSF1* |
| ENST00000579053 | ENST00000583771 | *ENOSF1* |
| ENST00000579053 | ENST00000580982 | *ENOSF1* |
| ENST00000579053 | ENST00000539164 | *ENOSF1* |
| ENST00000394449 | ENST00000406733 | *TBC1D22A* |
| ENST00000394449 | ENST00000337137 | *TBC1D22A* |
| ENST00000394449 | ENST00000407381 | *TBC1D22A* |
| ENST00000394449 | ENST00000380995 | *TBC1D22A* |
| ENST00000394449 | ENST00000355704 | *TBC1D22A* |
| ENST00000553619 | ENST00000554659 | *VTI1B* |
| ENST00000553619 | ENST00000556461 | *VTI1B* |
| ENST00000553619 | ENST00000554636 | *VTI1B* |
| ENST00000553619 | ENST00000557564 | *RP11-1012A1.4* |
| NR_027796 | ENST00000383675 | *C3ORF17* |
| NR_027796 | ENST00000393857 | *C3ORF17* |
| NR_027796 | ENST00000472166 | *C3ORF17* |
| NR_027796 | ENST00000314400 | *C3ORF17* |
| ENST00000487667 | ENST00000374516 | *PHF1* |
| ENST00000487667 | ENST00000427004 | *PHF1* |
| ENST00000487667 | ENST00000428274 | *PHF1* |
| ENST00000487667 | ENST00000374512 | *PHF1* |
| ENST00000487667 | ENST00000427826 | *PHF1* |
| ENST00000573556 | ENST00000390015 | *GAA* |
| ENST00000573556 | ENST00000302262 | *GAA* |
| ENST00000520640 | ENST00000542911 | *YTHDF3* |
| ENST00000520640 | ENST00000517371 | *YTHDF3* |
| ENST00000520640 | ENST00000518373 | *YTHDF3* |
| ENST00000520640 | ENST00000539294 | *YTHDF3* |
| ENST00000433258 | ENST00000272438 | *TEX261* |
| ENST00000433258 | ENST00000606025 | *AC007040.11* |
| NONHSAG037117 | ENST00000318037 | *RNF168* |
| ENST00000485512 | ENST00000367231 | *MTRF1L* |
| ENST00000485512 | ENST00000367233 | *MTRF1L* |
| ENST00000485512 | ENST00000414771 | *MTRF1L* |
| ENST00000485512 | ENST00000448966 | *MTRF1L* |
| ENST00000485512 | ENST00000367230 | *MTRF1L* |
| NONHSAT013501 | ENST00000373886 | *BICC1* |
| ENST00000533846 | ENST00000530123 | *NRBP2* |
| ENST00000533846 | ENST00000442628 | *NRBP2* |
| ENST00000533846 | ENST00000327830 | *NRBP2* |
| ENST00000533846 | ENST00000530347 | *NRBP2* |
| ENST00000533303 | ENST00000531383 | *B3GAT3* |
| ENST00000533303 | ENST00000534026 | *B3GAT3* |
| ENST00000533303 | ENST00000534715 | *B3GAT3* |
| ENST00000533303 | ENST00000265471 | *B3GAT3* |
| ENST00000466546 | ENST00000497895 | *KRBA1* |
| ENST00000466546 | ENST00000486744 | *KRBA1* |
| ENST00000466546 | ENST00000319551 | *KRBA1* |
| ENST00000466546 | ENST00000467333 | *KRBA1* |
| ENST00000466546 | ENST00000255992 | *KRBA1* |
| ENST00000466546 | ENST00000485033 | *KRBA1* |
| ENST00000494180 | ENST00000393235 | *CALHM2* |
| ENST00000494180 | ENST00000260743 | *CALHM2* |
| ENST00000494180 | ENST00000369788 | *CALHM2* |
| ENST00000484026 | ENST00000381401 | *SLC25A6* |
| ENST00000504594 | ENST00000503853 | *PRELID1* |
| ENST00000504594 | ENST00000503216 | *PRELID1* |
| ENST00000504594 | ENST00000303204 | *PRELID1* |
| ENST00000419433 | ENST00000392106 | *STK36* |
| ENST00000419433 | ENST00000295709 | *STK36* |
| ENST00000419433 | ENST00000440309 | *STK36* |
| ENST00000419433 | ENST00000392105 | *STK36* |
| ENST00000509420 | ENST00000264932 | *SDHA* |
| ENST00000509420 | ENST00000510361 | *SDHA* |
| ENST00000509420 | ENST00000504309 | *SDHA* |
| ENST00000523863 | ENST00000517970 | *WWP1* |
| ENST00000523863 | ENST00000341922 | *WWP1* |
| ENST00000523863 | ENST00000349423 | *WWP1* |
| ENST00000523863 | ENST00000265428 | *WWP1* |
| ENST00000505882 | ENST00000368489 | *ATP8B2* |
| NONHSAG014203 | ENST00000218789 | *ARHGEF7* |
| NONHSAG014203 | ENST00000375737 | *ARHGEF7* |
| NONHSAG014203 | ENST00000426073 | *ARHGEF7* |
| NONHSAG014203 | ENST00000370623 | *ARHGEF7* |
| NONHSAG014203 | ENST00000375736 | *ARHGEF7* |
| ENST00000563848 | ENST00000561959 | *DEF8* |
| ENST00000589176 | ENST00000268756 | *PHF12* |
| ENST00000589176 | ENST00000332830 | *PHF12* |
| ENST00000589176 | ENST00000577226 | *PHF12* |
| ENST00000589176 | ENST00000579036 | *PHF12* |
| NR_034076 | ENST00000507051 | *SEC31A* |
| NR_034076 | ENST00000507676 | *SEC31A* |
| NR_034076 | ENST00000506495 | *SEC31A* |
| NR_034076 | ENST00000503210 | *SEC31A* |
| NR_034076 | ENST00000355196 | *SEC31A* |
| ENST00000495004 | ENST00000484644 | *PDIA5* |
| ENST00000495004 | ENST00000316218 | *PDIA5* |
| ENST00000472011 | ENST00000543662 | *TBCE* |
| ENST00000472011 | ENST00000366601 | *TBCE* |
| ENST00000472011 | ENST00000406207 | *TBCE* |
| ENST00000583834 | ENST00000581466 | *NAT9* |
| ENST00000583834 | ENST00000583757 | *NAT9* |
| ENST00000583834 | ENST00000580301 | *NAT9* |
| ENST00000583834 | ENST00000357814 | *NAT9* |
| ENST00000583834 | ENST00000581136 | *NAT9* |
| ENST00000583834 | ENST00000580632 | *NAT9* |
| ENST00000583834 | ENST00000582524 | *NAT9* |
| ENST00000583834 | ENST00000578822 | *NAT9* |
| ENST00000583834 | ENST00000581451 | *NAT9* |
| ENST00000583834 | ENST00000583476 | *NAT9* |
| ENST00000583834 | ENST00000578947 | *NAT9* |
| ENST00000583834 | ENST00000582870 | *NAT9* |
| ENST00000583834 | ENST00000579218 | *NAT9* |
| NR_033704 | ENST00000415773 | *VAMP4* |
| NR_033704 | ENST00000367740 | *VAMP4* |
| NR_033704 | ENST00000236192 | *VAMP4* |
| ENST00000528973 | ENST00000320934 | *PCSK7* |
| ENST00000528973 | ENST00000540028 | *PCSK7* |
| ENST00000524299 | ENST00000357668 | *ASAP1* |
| ENST00000524299 | ENST00000521426 | *ASAP1* |
| ENST00000524299 | ENST00000518721 | *ASAP1* |
| ENST00000524299 | ENST00000520342 | *ASAP1* |
| ENST00000524299 | ENST00000524367 | *ASAP1* |
| ENST00000543243 | ENST00000544827 | *REXO2* |
| ENST00000543243 | ENST00000265881 | *REXO2* |
| ENST00000543243 | ENST00000539119 | *REXO2* |
| ENST00000543243 | ENST00000539275 | *REXO2* |
| ENST00000543243 | ENST00000544196 | *REXO2* |
| ENST00000543243 | ENST00000539754 | *REXO2* |
| ENST00000555296 | ENST00000256379 | *MED6* |
| ENST00000555296 | ENST00000430055 | *MED6* |
| ENST00000555296 | ENST00000440435 | *MED6* |
| ENST00000555296 | ENST00000554963 | *MED6* |
| NONHSAT013879 | ENST00000335350 | *UNC5B* |
| NONHSAT013879 | ENST00000373192 | *UNC5B* |
| ENST00000411973 | ENST00000441983 | *TRAPPC12* |
| ENST00000411973 | ENST00000382110 | *TRAPPC12* |
| ENST00000411973 | ENST00000324266 | *TRAPPC12* |
| ENST00000471092 | ENST00000441667 | *MDFI* |
| ENST00000471092 | ENST00000446650 | *MDFI* |
| ENST00000471092 | ENST00000230321 | *MDFI* |
| ENST00000471092 | ENST00000373051 | *MDFI* |
| ENST00000471092 | ENST00000373050 | *MDFI* |
| ENST00000471092 | ENST00000432027 | *MDFI* |
| ENST00000471092 | ENST00000419164 | *MDFI* |
| ENST00000471092 | ENST00000435476 | *MDFI* |
| ENST00000590347 | ENST00000444172 | *CIRBP* |
| ENST00000590347 | ENST00000587896 | *CIRBP* |
| ENST00000590347 | ENST00000320936 | *CIRBP* |
| ENST00000590347 | ENST00000592051 | *CIRBP* |
| ENST00000590347 | ENST00000589266 | *CIRBP* |
| ENST00000590347 | ENST00000588030 | *CIRBP* |
| ENST00000590347 | ENST00000588344 | *CIRBP* |
| ENST00000590347 | ENST00000589710 | *CIRBP* |
| ENST00000590347 | ENST00000589686 | *CIRBP* |
| ENST00000590347 | ENST00000589660 | *CIRBP* |
| ENST00000590347 | ENST00000586548 | *CIRBP* |
| ENST00000590347 | ENST00000586773 | *CIRBP* |
| ENST00000590347 | ENST00000588090 | *CIRBP* |
| ENST00000590347 | ENST00000413636 | *CIRBP* |
| ENST00000590347 | ENST00000592815 | *CIRBP* |
| ENST00000590347 | ENST00000591659 | *CIRBP* |
| ENST00000590347 | ENST00000588411 | *CIRBP* |
| ENST00000590347 | ENST00000589235 | *CIRBP* |
| ENST00000590347 | ENST00000587323 | *CIRBP* |
| ENST00000590347 | ENST00000591935 | *CIRBP* |
| ENST00000590347 | ENST00000586472 | *CIRBP* |
| ENST00000590347 | ENST00000585630 | *CIRBP* |
| ENST00000590347 | ENST00000588230 | *CIRBP* |
| ENST00000548958 | ENST00000442339 | *CAPS2* |
| ENST00000548958 | ENST00000552497 | *CAPS2* |
| ENST00000548958 | ENST00000551829 | *CAPS2* |
| ENST00000548958 | ENST00000436898 | *CAPS2* |
| ENST00000585797 | ENST00000586614 | *C19ORF82* |
| ENST00000585797 | ENST00000592851 | *C19ORF82* |
| ENST00000585797 | ENST00000591056 | *C19ORF82* |
| ENST00000585797 | ENST00000587536 | *C19ORF82* |
| ENST00000432197 | ENST00000361821 | *KRI1* |
| ENST00000432197 | ENST00000312962 | *KRI1* |
| ENST00000432197 | ENST00000543682 | *KRI1* |
| ENST00000432197 | ENST00000539027 | *KRI1* |
| ENST00000543521 | ENST00000393567 | *HYDIN* |
| ENST00000498917 | ENST00000322244 | *UBA6* |
| ENST00000498917 | ENST00000420827 | *UBA6* |
| ENST00000551907 | ENST00000550643 | *SPATS2* |
| ENST00000551907 | ENST00000552918 | *SPATS2* |
| ENST00000551907 | ENST00000550997 | *SPATS2* |
| ENST00000551907 | ENST00000321898 | *SPATS2* |
| ENST00000551907 | ENST00000553127 | *SPATS2* |
| ENST00000551907 | ENST00000548377 | *SPATS2* |
| ENST00000551907 | ENST00000551540 | *SPATS2* |
| ENST00000551907 | ENST00000552171 | *SPATS2* |
| ENST00000551907 | ENST00000549298 | *SPATS2* |
| ENST00000551907 | ENST00000548710 | *SPATS2* |
| ENST00000551907 | ENST00000549538 | *SPATS2* |
| ENST00000551907 | ENST00000548777 | *SPATS2* |
| ENST00000551907 | ENST00000547865 | *SPATS2* |
| ENST00000551907 | ENST00000549179 | *SPATS2* |
| ENST00000551907 | ENST00000548654 | *SPATS2* |
| ENST00000459697 | ENST00000319942 | *RABGGTB* |
| ENST00000459697 | ENST00000535300 | *RABGGTB* |
| NONHSAT129179 | ENST00000519656 | *EFR3A* |
| NONHSAT129179 | ENST00000254624 | *EFR3A* |
| NONHSAT129179 | ENST00000334503 | *EFR3A* |
| ENST00000583948 | ENST00000447371 | *NUP85* |
| ENST00000583948 | ENST00000579298 | *NUP85* |
| ENST00000583948 | ENST00000245544 | *NUP85* |
| ENST00000583948 | ENST00000583877 | *NUP85* |
| ENST00000583948 | ENST00000583070 | *NUP85* |
| ENST00000583948 | ENST00000541827 | *NUP85* |
| ENST00000583948 | ENST00000579324 | *NUP85* |
| ENST00000583948 | ENST00000583569 | *NUP85* |
| ENST00000583948 | ENST00000579557 | *NUP85* |
| ENST00000588534 | ENST00000591265 | *ZNF554* |
| ENST00000588534 | ENST00000317243 | *ZNF554* |
| ENST00000474315 | ENST00000380851 | *IDH3B* |
| ENST00000474315 | ENST00000380843 | *IDH3B* |
| ENST00000466771 | ENST00000407693 | *PTGR1* |
| ENST00000466771 | ENST00000538962 | *PTGR1* |
| ENST00000466771 | ENST00000309195 | *PTGR1* |
| ENST00000466771 | ENST00000238248 | *PTGR1* |
| ENST00000500185 | ENST00000253925 | *PPFIA1* |
| ENST00000500185 | ENST00000389547 | *PPFIA1* |
| ENST00000500185 | ENST00000346329 | *CTTN* |
| ENST00000299906 | ENST00000493442 | *FAM199X* |
| ENST00000556666 | ENST00000356583 | *SPATA7* |
| ENST00000556666 | ENST00000556553 | *SPATA7* |
| ENST00000556666 | ENST00000393545 | *SPATA7* |
| ENST00000556666 | ENST00000555401 | *SPATA7* |
| ENST00000556666 | ENST00000554802 | *SPATA7* |
| ENST00000556666 | ENST00000556406 | *SPATA7* |
| ENST00000556666 | ENST00000045347 | *SPATA7* |
| ENST00000556666 | ENST00000553885 | *SPATA7* |
| ENST00000571790 | ENST00000433392 | *NUBP1* |
| ENST00000571790 | ENST00000574334 | *NUBP1* |
| ENST00000571790 | ENST00000283027 | *NUBP1* |
| ENST00000571790 | ENST00000571175 | *NUBP1* |
| ENST00000571790 | ENST00000574691 | *NUBP1* |
| ENST00000574816 | ENST00000574468 | *PAFAH1B1* |
| ENST00000574816 | ENST00000397195 | *PAFAH1B1* |
| ENST00000574816 | ENST00000451360 | *PAFAH1B1* |
| ENST00000393710 | ENST00000370015 | *NAA10* |
| ENST00000393710 | ENST00000393712 | *NAA10* |
| ENST00000393710 | ENST00000464845 | *NAA10* |
| ENST00000393710 | ENST00000370011 | *NAA10* |
| ENST00000393710 | ENST00000370009 | *NAA10* |
| ENST00000393710 | ENST00000432089 | *NAA10* |
| ENST00000531457 | ENST00000428359 | *SLCO2B1* |
| ENST00000531457 | ENST00000534004 | *SLCO2B1* |
| ENST00000531457 | ENST00000454962 | *SLCO2B1* |
| ENST00000531457 | ENST00000532236 | *SLCO2B1* |
| ENST00000531457 | ENST00000531756 | *SLCO2B1* |
| ENST00000531457 | ENST00000525845 | *SLCO2B1* |
| ENST00000531457 | ENST00000289575 | *SLCO2B1* |
| ENST00000531457 | ENST00000530556 | *SLCO2B1* |
| ENST00000531457 | ENST00000341411 | *SLCO2B1* |
| ENST00000531457 | ENST00000534186 | *SLCO2B1* |
| ENST00000531457 | ENST00000527180 | *SLCO2B1* |
| ENST00000531457 | ENST00000525650 | *SLCO2B1* |
| ENST00000531457 | ENST00000531713 | *SLCO2B1* |
| ENST00000585968 | ENST00000590994 | *HAUS5* |
| ENST00000585968 | ENST00000203166 | *HAUS5* |
| ENST00000585968 | ENST00000379045 | *HAUS5* |
| ENST00000476541 | ENST00000393608 | *CIZ1* |
| ENST00000476541 | ENST00000415526 | *CIZ1* |
| ENST00000476541 | ENST00000277465 | *CIZ1* |
| ENST00000476541 | ENST00000325721 | *CIZ1* |
| ENST00000476541 | ENST00000372948 | *CIZ1* |
| ENST00000476541 | ENST00000541172 | *CIZ1* |
| ENST00000476541 | ENST00000372938 | *CIZ1* |
| ENST00000476541 | ENST00000538431 | *CIZ1* |
| ENST00000476541 | ENST00000372954 | *CIZ1* |
| ENST00000476541 | ENST00000357558 | *CIZ1* |
| ENST00000488774 | ENST00000356435 | *PTPRD* |
| ENST00000488774 | ENST00000481079 | *PTPRD* |
| ENST00000488774 | ENST00000381196 | *PTPRD* |
| ENST00000488774 | ENST00000540109 | *PTPRD* |
| ENST00000488774 | ENST00000397606 | *PTPRD* |
| ENST00000488774 | ENST00000397617 | *PTPRD* |
| ENST00000488774 | ENST00000355233 | *PTPRD* |
| ENST00000488774 | ENST00000486161 | *PTPRD* |
| ENST00000488774 | ENST00000463477 | *PTPRD* |
| ENST00000488774 | ENST00000397611 | *PTPRD* |
| ENST00000488774 | ENST00000537002 | *PTPRD* |
| ENST00000488774 | ENST00000360074 | *PTPRD* |
| ENST00000488774 | ENST00000358503 | *PTPRD* |
| ENST00000550141 | ENST00000293379 | *ITGA5* |
| NONHSAG004391 | ENST00000340934 | *BROX* |
| NONHSAG004391 | ENST00000537020 | *BROX* |
| NONHSAG004391 | ENST00000539697 | *BROX* |
| ENST00000594936 | ENST00000245907 | *C3* |
| ENST00000594936 | ENST00000600744 | *C3* |
| NONHSAG003812 | ENST00000235382 | *RGS2* |
| ENST00000588348 | ENST00000252530 | *FAM98C* |
| ENST00000588348 | ENST00000343358 | *FAM98C* |
| ENST00000588348 | ENST00000588262 | *FAM98C* |
| ENST00000588348 | ENST00000589408 | *FAM98C* |
| ENST00000487091 | ENST00000361545 | *CLIP2* |
| ENST00000487091 | ENST00000395060 | *CLIP2* |
| ENST00000487091 | ENST00000223398 | *CLIP2* |
| ENST00000487091 | ENST00000493166 | *CLIP2* |
| ENST00000527755 | ENST00000527410 | *HINFP* |
| ENST00000527755 | ENST00000350777 | *HINFP* |
| NONHSAG003623 | ENST00000263726 | *LHX4* |
| ENST00000463854 | ENST00000263904 | *STAM2* |
| ENST00000428425 | ENST00000411704 | *NCBP2* |
| ENST00000428425 | ENST00000427641 | *NCBP2* |
| ENST00000428425 | ENST00000452404 | *NCBP2* |
| ENST00000428425 | ENST00000422610 | *NCBP2* |
| ENST00000428425 | ENST00000447325 | *NCBP2* |
| ENST00000428425 | ENST00000455953 | *NCBP2* |
| ENST00000428425 | ENST00000321256 | *NCBP2* |
| ENST00000558161 | ENST00000559132 | *MAN2A2* |
| ENST00000558161 | ENST00000559999 | *MAN2A2* |
| ENST00000558161 | ENST00000558853 | *MAN2A2* |
| ENST00000558161 | ENST00000557865 | *MAN2A2* |
| ENST00000558161 | ENST00000558171 | *MAN2A2* |
| ENST00000558161 | ENST00000430376 | *MAN2A2* |
| ENST00000558161 | ENST00000431652 | *MAN2A2* |
| ENST00000558161 | ENST00000559965 | *MAN2A2* |
| ENST00000558161 | ENST00000560147 | *MAN2A2* |
| ENST00000558161 | ENST00000557990 | *MAN2A2* |
| ENST00000558161 | ENST00000559717 | *MAN2A2* |
| ENST00000558161 | ENST00000360468 | *MAN2A2* |
| ENST00000558161 | ENST00000560616 | *MAN2A2* |
| ENST00000558161 | ENST00000558290 | *MAN2A2* |
| NONHSAG005846 | ENST00000374179 | *MAPK8* |
| NONHSAG005846 | ENST00000374174 | *MAPK8* |
| NONHSAG005846 | ENST00000374189 | *MAPK8* |
| NONHSAG005846 | ENST00000360332 | *MAPK8* |
| NONHSAG005846 | ENST00000374182 | *MAPK8* |
| NONHSAG005846 | ENST00000395611 | *MAPK8* |
| NONHSAG005846 | ENST00000374176 | *MAPK8* |
| ENST00000503252 | ENST00000283415 | *LPCAT1* |
| ENST00000588320 | ENST00000435881 | *MLX* |
| ENST00000588320 | ENST00000346833 | *MLX* |
| ENST00000588320 | ENST00000591024 | *MLX* |
| ENST00000588320 | ENST00000246912 | *MLX* |
| ENST00000520579 | ENST00000517957 | *PDGFRB* |
| ENST00000520579 | ENST00000517488 | *PDGFRB* |
| ENST00000520579 | ENST00000261799 | *PDGFRB* |
| ENST00000463753 | ENST00000261037 | *COL8A1* |
| ENST00000463753 | ENST00000452013 | *COL8A1* |
| ENST00000463753 | ENST00000273342 | *COL8A1* |
| ENST00000473576 | ENST00000378282 | *EBPL* |
| ENST00000473576 | ENST00000378272 | *EBPL* |
| ENST00000473576 | ENST00000378270 | *EBPL* |
| ENST00000473576 | ENST00000378284 | *EBPL* |
| ENST00000473576 | ENST00000242827 | *EBPL* |
| ENST00000473576 | ENST00000378268 | *EBPL* |
| ENST00000527646 | ENST00000526578 | *VPS51* |
| ENST00000527646 | ENST00000534557 | *VPS51* |
| ENST00000527646 | ENST00000530773 | *VPS51* |
| ENST00000527646 | ENST00000528588 | *VPS51* |
| ENST00000527646 | ENST00000526856 | *VPS51* |
| ENST00000527646 | ENST00000529180 | *VPS51* |
| ENST00000527646 | ENST00000279281 | *VPS51* |
| ENST00000527646 | ENST00000530673 | *VPS51* |
| ENST00000460289 | ENST00000263708 | *PTPN4* |
| ENST00000460289 | ENST00000420482 | *PTPN4* |
| ENST00000460289 | ENST00000488279 | *PTPN4* |
| ENST00000523948 | ENST00000260129 | *TGS1* |
| NONHSAT094882 | ENST00000500728 | *LRPAP1* |
| ENST00000485031 | ENST00000361156 | *DZIP1* |
| ENST00000485031 | ENST00000376829 | *DZIP1* |
| ENST00000485031 | ENST00000347108 | *DZIP1* |
| ENST00000485031 | ENST00000361396 | *DZIP1* |
| ENST00000534532 | ENST00000532445 | *NCAPD3* |
| ENST00000534532 | ENST00000527944 | *NCAPD3* |
| ENST00000534532 | ENST00000526422 | *NCAPD3* |
| ENST00000534532 | ENST00000530396 | *NCAPD3* |
| ENST00000534532 | ENST00000534548 | *NCAPD3* |
| ENST00000534532 | ENST00000525485 | *NCAPD3* |
| ENST00000534532 | ENST00000534227 | *NCAPD3* |
| ENST00000520374 | ENST00000517970 | *WWP1* |
| ENST00000520374 | ENST00000265428 | *WWP1* |
| ENST00000520374 | ENST00000341922 | *WWP1* |
| ENST00000520374 | ENST00000349423 | *WWP1* |
| ENST00000557827 | ENST00000561212 | *ZEB1* |
| ENST00000557827 | ENST00000424869 | *ZEB1* |
| ENST00000557827 | ENST00000558440 | *ZEB1* |
| ENST00000557827 | ENST00000560721 | *ZEB1* |
| ENST00000557827 | ENST00000361642 | *ZEB1* |
| ENST00000557827 | ENST00000542815 | *ZEB1* |
| ENST00000557827 | ENST00000320985 | *ZEB1* |
| ENST00000557827 | ENST00000446923 | *ZEB1* |
| ENST00000557827 | ENST00000559476 | *ZEB1* |
| ENST00000555782 | ENST00000487270 | *RAD51B* |
| ENST00000555782 | ENST00000488612 | *RAD51B* |
| ENST00000555782 | ENST00000487861 | *RAD51B* |
| ENST00000555782 | ENST00000390683 | *RAD51B* |
| ENST00000492390 | ENST00000357760 | *CDK11A* |
| ENST00000492390 | ENST00000378638 | *CDK11A* |
| ENST00000492390 | ENST00000378633 | *CDK11A* |
| ENST00000492390 | ENST00000358779 | *CDK11A* |
| ENST00000492390 | ENST00000378635 | *CDK11A* |
| ENST00000492390 | ENST00000356200 | *CDK11A* |
| ENST00000492390 | ENST00000404249 | *CDK11A* |
| ENST00000366583 | ENST00000352231 | *LGALS8* |
| ENST00000366583 | ENST00000454943 | *LGALS8* |
| ENST00000366583 | ENST00000527974 | *LGALS8* |
| ENST00000366583 | ENST00000525042 | *LGALS8* |
| ENST00000366583 | ENST00000341872 | *LGALS8* |
| ENST00000366583 | ENST00000450372 | *LGALS8* |
| ENST00000366583 | ENST00000366584 | *LGALS8* |
| ENST00000366583 | ENST00000238181 | *LGALS8* |
| ENST00000366583 | ENST00000430527 | *LGALS8* |
| ENST00000366583 | ENST00000416919 | *LGALS8* |
| ENST00000366583 | ENST00000406509 | *LGALS8* |
| ENST00000366583 | ENST00000529489 | *LGALS8* |
| ENST00000366583 | ENST00000481485 | *LGALS8* |
| ENST00000366583 | ENST00000526634 | *LGALS8* |
| ENST00000366583 | ENST00000323938 | *LGALS8* |
| ENST00000366583 | ENST00000526589 | *LGALS8* |
| ENST00000536349 | ENST00000550113 | *MAN1B1* |
| ENST00000536349 | ENST00000535144 | *MAN1B1* |
| ENST00000536349 | ENST00000475449 | *MAN1B1* |
| ENST00000536349 | ENST00000474902 | *MAN1B1* |
| ENST00000536349 | ENST00000371589 | *MAN1B1* |
| NONHSAT130037 | ENST00000324333 | *GLIS3* |
| NONHSAT130037 | ENST00000462164 | *GLIS3* |
| NONHSAT130037 | ENST00000381971 | *GLIS3* |
| NONHSAT130037 | ENST00000478315 | *GLIS3* |
| NONHSAT130037 | ENST00000478844 | *GLIS3* |
| NONHSAT130037 | ENST00000481827 | *GLIS3* |
| NONHSAT130037 | ENST00000477901 | *GLIS3* |
| ENST00000482997 | ENST00000263904 | *STAM2* |
| NONHSAG034991 | ENST00000296149 | *ELP6* |
| NONHSAG034991 | ENST00000412761 | *ELP6* |
| NONHSAG034991 | ENST00000449409 | *ELP6* |
| NONHSAG034991 | ENST00000425291 | *ELP6* |
| NONHSAG034991 | ENST00000446787 | *ELP6* |
| NONHSAG034991 | ENST00000439305 | *ELP6* |
| NONHSAG034991 | ENST00000444760 | *ELP6* |
| ENST00000564620 | ENST00000268802 | *NOB1* |
| ENST00000495023 | ENST00000588222 | *GGNBP2* |
| ENST00000495023 | ENST00000304718 | *GGNBP2* |
| ENST00000495023 | ENST00000593016 | *GGNBP2* |
| ENST00000495023 | ENST00000485685 | *GGNBP2* |
| ENST00000461376 | ENST00000392190 | *NIT1* |
| ENST00000461376 | ENST00000368008 | *NIT1* |
| ENST00000461376 | ENST00000368007 | *NIT1* |
| ENST00000461376 | ENST00000368009 | *NIT1* |
| NR_033663 | ENST00000222139 | *EPOR* |
| NR_033663 | ENST00000592375 | *EPOR* |
| ENST00000398187 | ENST00000540054 | *FAM76B* |
| ENST00000398187 | ENST00000542135 | *FAM76B* |
| ENST00000398187 | ENST00000358780 | *FAM76B* |
| ENST00000398187 | ENST00000536839 | *FAM76B* |
| ENST00000398187 | ENST00000537749 | *FAM76B* |
| NONHSAT056352 | ENST00000573882 | *CARD14* |
| NONHSAT056352 | ENST00000392434 | *CARD14* |
| NONHSAT056352 | ENST00000570421 | *CARD14* |
| NONHSAT056352 | ENST00000344227 | *CARD14* |
| ENST00000514450 | ENST00000424120 | *CC2D2A* |
| ENST00000514450 | ENST00000438599 | *CC2D2A* |
| ENST00000514450 | ENST00000511544 | *CC2D2A* |
| ENST00000514450 | ENST00000515124 | *CC2D2A* |
| ENST00000514450 | ENST00000389652 | *CC2D2A* |
| ENST00000514450 | ENST00000507954 | *CC2D2A* |
| ENST00000514450 | ENST00000503292 | *CC2D2A* |
| ENST00000514450 | ENST00000413206 | *CC2D2A* |
| ENST00000514450 | ENST00000512702 | *CC2D2A* |
| ENST00000514450 | ENST00000503658 | *CC2D2A* |
| ENST00000525844 | ENST00000358731 | *BDP1* |
| ENST00000525844 | ENST00000380675 | *BDP1* |
| ENST00000536336 | ENST00000336349 | *SPTY2D1* |
| NONHSAG014111 | ENST00000602836 | *BIVM-ERCC5* |
| ENST00000342392 | ENST00000464942 | *DIABLO* |
| ENST00000342392 | ENST00000446652 | *DIABLO* |
| ENST00000342392 | ENST00000541273 | *DIABLO* |
| ENST00000342392 | ENST00000485724 | *DIABLO* |
| ENST00000342392 | ENST00000353548 | *DIABLO* |
| ENST00000342392 | ENST00000541656 | *DIABLO* |
| ENST00000342392 | ENST00000267169 | *DIABLO* |
| ENST00000342392 | ENST00000443649 | *DIABLO* |
| ENST00000342392 | ENST00000413918 | *DIABLO* |
| ENST00000342392 | ENST00000439489 | *DIABLO* |
| ENST00000342392 | ENST00000474004 | *DIABLO* |
| ENST00000342392 | ENST00000540535 | *DIABLO* |
| NONHSAT016495 | ENST00000409522 | *ENO4* |
| NONHSAT016495 | ENST00000512864 | *ENO4* |
| NONHSAT016495 | ENST00000341276 | *ENO4* |
| NONHSAG006153 | ENST00000335350 | *UNC5B* |
| NONHSAG006153 | ENST00000373192 | *UNC5B* |
| ENST00000533408 | ENST00000344035 | *PTP4A2* |
| ENST00000533408 | ENST00000602725 | *PTP4A2* |
| ENST00000533408 | ENST00000534796 | *PTP4A2* |
| ENST00000533408 | ENST00000356536 | *PTP4A2* |
| ENST00000533408 | ENST00000468531 | *PTP4A2* |
| NONHSAT074175 | ENST00000428314 | *MYO7B* |
| NONHSAT074175 | ENST00000389524 | *MYO7B* |
| NONHSAT074175 | ENST00000409816 | *MYO7B* |
| NONHSAT074175 | ENST00000409090 | *MYO7B* |
| ENST00000588720 | ENST00000588462 | *BCAS3* |
| ENST00000588720 | ENST00000589222 | *BCAS3* |
| ENST00000588720 | ENST00000408905 | *BCAS3* |
| ENST00000588720 | ENST00000390652 | *BCAS3* |
| ENST00000588720 | ENST00000585744 | *BCAS3* |
| ENST00000588720 | ENST00000407086 | *BCAS3* |
| ENST00000588720 | ENST00000588874 | *BCAS3* |
| ENST00000490389 | ENST00000595437 | *FARP1* |
| ENST00000490389 | ENST00000601009 | *FARP1* |
| ENST00000490389 | ENST00000599040 | *FARP1* |
| ENST00000490389 | ENST00000598389 | *FARP1* |
| ENST00000490389 | ENST00000376586 | *FARP1* |
| ENST00000490389 | ENST00000319562 | *FARP1* |
| NONHSAG000165 | ENST00000426449 | *TNFRSF14* |
| NONHSAG000165 | ENST00000434817 | *TNFRSF14* |
| NONHSAG000165 | ENST00000355716 | *TNFRSF14* |
| NONHSAG000165 | ENST00000409119 | *TNFRSF14* |
| NONHSAG000165 | ENST00000451778 | *TNFRSF14* |
| NONHSAG000165 | ENST00000435221 | *TNFRSF14* |
| ENST00000431138 | ENST00000265728 | *DBF4* |
| ENST00000546814 | ENST00000547256 | *LETMD1* |
| ENST00000546814 | ENST00000551477 | *LETMD1* |
| ENST00000546814 | ENST00000380123 | *LETMD1* |
| ENST00000546814 | ENST00000550929 | *LETMD1* |
| ENST00000546814 | ENST00000550442 | *LETMD1* |
| ENST00000546814 | ENST00000547008 | *LETMD1* |
| ENST00000546814 | ENST00000553043 | *LETMD1* |
| ENST00000546814 | ENST00000550814 | *LETMD1* |
| ENST00000546814 | ENST00000548251 | *LETMD1* |
| ENST00000546814 | ENST00000549340 | *LETMD1* |
| ENST00000546814 | ENST00000551931 | *LETMD1* |
| ENST00000546814 | ENST00000552739 | *LETMD1* |
| ENST00000546814 | ENST00000262055 | *LETMD1* |
| ENST00000546814 | ENST00000548209 | *LETMD1* |
| ENST00000546814 | ENST00000418425 | *LETMD1* |
| ENST00000546814 | ENST00000547660 | *LETMD1* |
| ENST00000544639 | ENST00000542018 | *RAP1B* |
| ENST00000544639 | ENST00000539091 | *RAP1B* |
| ENST00000544639 | ENST00000485252 | *RAP1B* |
| ENST00000544639 | ENST00000538877 | *RAP1B* |
| ENST00000544639 | ENST00000545720 | *RAP1B* |
| ENST00000544639 | ENST00000541216 | *RAP1B* |
| ENST00000544639 | ENST00000453560 | *RAP1B* |
| ENST00000544639 | ENST00000543393 | *RAP1B* |
| ENST00000544639 | ENST00000545270 | *RAP1B* |
| ENST00000544639 | ENST00000250559 | *RAP1B* |
| ENST00000544639 | ENST00000341355 | *RAP1B* |
| ENST00000544639 | ENST00000538283 | *RAP1B* |
| ENST00000544639 | ENST00000540781 | *RAP1B* |
| ENST00000544639 | ENST00000535492 | *RAP1B* |
| ENST00000544639 | ENST00000425247 | *RAP1B* |
| ENST00000544639 | ENST00000543697 | *RAP1B* |
| ENST00000544639 | ENST00000541167 | *RAP1B* |
| ENST00000544639 | ENST00000378985 | *RAP1B* |
| ENST00000544639 | ENST00000540209 | *RAP1B* |
| ENST00000544639 | ENST00000537460 | *RAP1B* |
| ENST00000544639 | ENST00000534899 | *RAP1B* |
| ENST00000544639 | ENST00000538980 | *RAP1B* |
| ENST00000544639 | ENST00000393436 | *RAP1B* |
| ENST00000544639 | ENST00000422358 | *RAP1B* |
| ENST00000544639 | ENST00000542145 | *RAP1B* |
| ENST00000544639 | ENST00000450214 | *RAP1B* |
| ENST00000505090 | ENST00000415618 | *CANX* |
| ENST00000505090 | ENST00000512607 | *CANX* |
| ENST00000505090 | ENST00000504734 | *CANX* |
| ENST00000505090 | ENST00000452673 | *CANX* |
| ENST00000505090 | ENST00000247461 | *CANX* |
| NONHSAT081892 | ENST00000399240 | *RUNX1* |
| NONHSAT081892 | ENST00000344691 | *RUNX1* |
| NONHSAT081892 | ENST00000325074 | *RUNX1* |
| NONHSAT081892 | ENST00000358356 | *RUNX1* |
| NONHSAT081892 | ENST00000437180 | *RUNX1* |
| NONHSAT081892 | ENST00000300305 | *RUNX1* |
| ENST00000586620 | ENST00000588014 | *MKNK2* |
| ENST00000586620 | ENST00000591142 | *MKNK2* |
| ENST00000586620 | ENST00000541165 | *MKNK2* |
| ENST00000586620 | ENST00000309340 | *MKNK2* |
| ENST00000586620 | ENST00000250896 | *MKNK2* |
| ENST00000586620 | ENST00000589441 | *MKNK2* |
| ENST00000586620 | ENST00000591588 | *MKNK2* |
| ENST00000586620 | ENST00000591601 | *MKNK2* |
| NONHSAT001142 | ENST00000430580 | *NBPF1* |
| ENST00000508930 | ENST00000515499 | *TRIM41* |
| ENST00000508930 | ENST00000351937 | *TRIM41* |
| ENST00000508930 | ENST00000315073 | *TRIM41* |
| ENST00000591595 | ENST00000429416 | *SMARCA4* |
| ENST00000591595 | ENST00000358026 | *SMARCA4* |
| ENST00000591595 | ENST00000450717 | *SMARCA4* |
| ENST00000591595 | ENST00000590574 | *SMARCA4* |
| ENST00000591595 | ENST00000444061 | *SMARCA4* |
| ENST00000591595 | ENST00000541122 | *SMARCA4* |
| ENST00000591595 | ENST00000344626 | *SMARCA4* |
| ENST00000591595 | ENST00000413806 | *SMARCA4* |
| ENST00000591595 | ENST00000586985 | *SMARCA4* |
| ENST00000591595 | ENST00000589677 | *SMARCA4* |
| ENST00000591595 | ENST00000592158 | *SMARCA4* |
| ENST00000504788 | ENST00000261366 | *LMNB1* |
| ENST00000504788 | ENST00000395354 | *LMNB1* |
| ENST00000459755 | ENST00000374182 | *MAPK8* |
| ENST00000459755 | ENST00000374176 | *MAPK8* |
| ENST00000459755 | ENST00000395611 | *MAPK8* |
| ENST00000459755 | ENST00000360332 | *MAPK8* |
| ENST00000459755 | ENST00000374189 | *MAPK8* |
| ENST00000459755 | ENST00000374179 | *MAPK8* |
| ENST00000497143 | ENST00000379367 | *NAA16* |
| ENST00000497143 | ENST00000379406 | *NAA16* |
| NONHSAG037138 | ENST00000296350 | *MFI2* |
| ENST00000491861 | ENST00000375333 | *STK19* |
| ENST00000491861 | ENST00000375331 | *STK19* |
| ENST00000467058 | ENST00000260665 | *LRPPRC* |
| ENST00000467058 | ENST00000409946 | *LRPPRC* |
| ENST00000467058 | ENST00000409659 | *LRPPRC* |
| ENST00000427947 | ENST00000450966 | *USP40* |
| ENST00000427947 | ENST00000443711 | *USP40* |
| ENST00000427947 | ENST00000251722 | *USP40* |
| ENST00000427947 | ENST00000427112 | *USP40* |
| ENST00000376899 | ENST00000471387 | *YIF1A* |
| ENST00000376899 | ENST00000359461 | *YIF1A* |
| ENST00000376899 | ENST00000431556 | *YIF1A* |
| ENST00000376899 | ENST00000528575 | *YIF1A* |
| ENST00000376899 | ENST00000376901 | *YIF1A* |
| ENST00000551258 | ENST00000392514 | *RPLP0* |
| ENST00000551258 | ENST00000550423 | *RPLP0* |
| ENST00000551258 | ENST00000546990 | *RPLP0* |
| ENST00000551258 | ENST00000552292 | *RPLP0* |
| ENST00000551258 | ENST00000547191 | *RPLP0* |
| ENST00000551258 | ENST00000547211 | *RPLP0* |
| ENST00000551258 | ENST00000313104 | *RPLP0* |
| ENST00000551258 | ENST00000546989 | *RPLP0* |
| ENST00000551258 | ENST00000550856 | *RPLP0* |
| ENST00000551258 | ENST00000228306 | *RPLP0* |
| ENST00000551258 | ENST00000551150 | *RPLP0* |
| ENST00000551258 | ENST00000551914 | *RPLP0* |
| ENST00000577549 | ENST00000425628 | *DHX40* |
| ENST00000577549 | ENST00000451169 | *DHX40* |
| ENST00000577549 | ENST00000251241 | *DHX40* |
| ENST00000529457 | ENST00000437307 | *SUMF2* |
| ENST00000529457 | ENST00000395436 | *SUMF2* |
| ENST00000529457 | ENST00000413756 | *SUMF2* |
| ENST00000529457 | ENST00000434526 | *SUMF2* |
| ENST00000529457 | ENST00000451338 | *SUMF2* |
| ENST00000529457 | ENST00000395435 | *SUMF2* |
| ENST00000529457 | ENST00000275607 | *SUMF2* |
| ENST00000529457 | ENST00000342190 | *SUMF2* |
| ENST00000529457 | ENST00000413952 | *SUMF2* |
| NR_049741 | ENST00000060969 | *SIKE1* |
| NR_049741 | ENST00000369528 | *SIKE1* |
| ENST00000395710 | ENST00000395711 | *SDAD1* |
| ENST00000395710 | ENST00000356260 | *SDAD1* |
| ENST00000487093 | ENST00000409535 | *RAD54L2* |
| ENST00000487093 | ENST00000296477 | *RAD54L2* |
| ENST00000487093 | ENST00000419358 | *TEX264* |
| ENST00000487093 | ENST00000432863 | *RAD54L2* |
| NONHSAG027767 | ENST00000607452 | *ACYP2* |
| NONHSAG027767 | ENST00000422521 | *ACYP2* |
| ENST00000585615 | ENST00000391953 | *CLASRP* |
| ENST00000585615 | ENST00000221455 | *CLASRP* |
| ENST00000585615 | ENST00000591904 | *CLASRP* |
| ENST00000585615 | ENST00000544944 | *CLASRP* |
| ENST00000368841 | ENST00000368843 | *SNX27* |
| ENST00000368841 | ENST00000458013 | *SNX27* |
| ENST00000368841 | ENST00000368838 | *SNX27* |
| ENST00000503068 | ENST00000507515 | *ZNF518B* |
| ENST00000503068 | ENST00000326756 | *ZNF518B* |
| ENST00000522355 | ENST00000521515 | *KIF13B* |
| ENST00000522355 | ENST00000524189 | *KIF13B* |
| ENST00000568593 | ENST00000265562 | *PTPN23* |
| ENST00000568593 | ENST00000431726 | *PTPN23* |
| ENST00000568593 | ENST00000456221 | *PTPN23* |
| ENST00000587640 | ENST00000592123 | *RHBDF2* |
| ENST00000587640 | ENST00000313080 | *RHBDF2* |
| ENST00000587640 | ENST00000591885 | *RHBDF2* |
| ENST00000587640 | ENST00000590288 | *RHBDF2* |
| ENST00000587640 | ENST00000591255 | *RHBDF2* |
| ENST00000587640 | ENST00000591192 | *RHBDF2* |
| ENST00000587640 | ENST00000585989 | *RHBDF2* |
| ENST00000587640 | ENST00000591879 | *RHBDF2* |
| ENST00000587640 | ENST00000589526 | *RHBDF2* |
| ENST00000587640 | ENST00000389760 | *RHBDF2* |
| ENST00000587640 | ENST00000591697 | *RHBDF2* |
| ENST00000587640 | ENST00000590322 | *RHBDF2* |
| ENST00000587640 | ENST00000585701 | *RHBDF2* |
| ENST00000360415 | ENST00000415001 | *CRCP* |
| ENST00000360415 | ENST00000338592 | *CRCP* |
| ENST00000360415 | ENST00000395326 | *CRCP* |
| ENST00000360415 | ENST00000431089 | *CRCP* |
| ENST00000360415 | ENST00000450043 | *AC068533.7* |
| ENST00000360415 | ENST00000398684 | *CRCP* |
| ENST00000602622 | ENST00000393919 | *ACD* |
| ENST00000602622 | ENST00000602382 | *ACD* |
| ENST00000602622 | ENST00000602320 | *ACD* |
| ENST00000602622 | ENST00000219251 | *ACD* |
| ENST00000602622 | ENST00000602850 | *ACD* |
| ENST00000520878 | ENST00000520957 | *CLK4* |
| ENST00000520878 | ENST00000316308 | *CLK4* |
| NONHSAG037035 | ENST00000347147 | *TMEM44* |
| NONHSAG037035 | ENST00000273580 | *TMEM44* |
| NONHSAG037035 | ENST00000429560 | *TMEM44* |
| NONHSAG037035 | ENST00000452358 | *TMEM44* |
| NONHSAG037035 | ENST00000432352 | *TMEM44* |
| NONHSAG037035 | ENST00000392432 | *TMEM44* |
| NONHSAG037035 | ENST00000473092 | *TMEM44* |
| NONHSAG037035 | ENST00000381975 | *TMEM44* |
| ENST00000469078 | ENST00000418063 | *ZNF90* |
| ENST00000464375 | ENST00000454122 | *ZNF638* |
| ENST00000464375 | ENST00000455226 | *ZNF638* |
| ENST00000464375 | ENST00000264447 | *ZNF638* |
| ENST00000464375 | ENST00000355812 | *ZNF638* |
| ENST00000464375 | ENST00000417778 | *ZNF638* |
| ENST00000464375 | ENST00000454278 | *ZNF638* |
| ENST00000464375 | ENST00000377802 | *ZNF638* |
| ENST00000464375 | ENST00000437658 | *ZNF638* |
| ENST00000464375 | ENST00000409544 | *ZNF638* |
| ENST00000464375 | ENST00000601581 | *ZNF638* |
| ENST00000492653 | ENST00000447788 | *ZC4H2* |
| ENST00000492653 | ENST00000337990 | *ZC4H2* |
| ENST00000492653 | ENST00000374839 | *ZC4H2* |
| ENST00000492653 | ENST00000545618 | *ZC4H2* |
| ENST00000451646 | ENST00000361923 | *PER3* |
| ENST00000451646 | ENST00000377532 | *PER3* |
| ENST00000577516 | ENST00000322444 | *KCTD2* |
| ENST00000577516 | ENST00000581589 | *KCTD2* |
| ENST00000529197 | ENST00000531274 | *TMEM126B* |
| ENST00000529197 | ENST00000534341 | *TMEM126B* |
| ENST00000529197 | ENST00000358867 | *TMEM126B* |
| ENST00000529197 | ENST00000393375 | *TMEM126B* |
| ENST00000466916 | ENST00000314888 | *TLN1* |
| ENST00000466916 | ENST00000540444 | *TLN1* |
| UCSC_TCONS_00014814 | ENST00000523572 | *KB-1980E6.3* |
| ENST00000561304 | ENST00000320985 | *ZEB1* |
| ENST00000561304 | ENST00000446923 | *ZEB1* |
| ENST00000561304 | ENST00000559476 | *ZEB1* |
| ENST00000561304 | ENST00000561212 | *ZEB1* |
| ENST00000561304 | ENST00000424869 | *ZEB1* |
| ENST00000561304 | ENST00000558440 | *ZEB1* |
| ENST00000561304 | ENST00000560721 | *ZEB1* |
| ENST00000561304 | ENST00000361642 | *ZEB1* |
| ENST00000561304 | ENST00000542815 | *ZEB1* |
| NONHSAT034981 | ENST00000376131 | *FGF14* |
| ENST00000565190 | ENST00000540839 | *FAM65A* |
| ENST00000565190 | ENST00000568959 | *FAM65A* |
| ENST00000565190 | ENST00000042381 | *FAM65A* |
| ENST00000565190 | ENST00000379312 | *FAM65A* |
| ENST00000565190 | ENST00000422602 | *FAM65A* |
| ENST00000565190 | ENST00000428437 | *FAM65A* |
| ENST00000506649 | ENST00000324953 | *CD164* |
| ENST00000506649 | ENST00000413644 | *CD164* |
| ENST00000506649 | ENST00000512821 | *CD164* |
| ENST00000506649 | ENST00000504373 | *CD164* |
| ENST00000506649 | ENST00000275080 | *CD164* |
| ENST00000506649 | ENST00000310786 | *CD164* |
| ENST00000506649 | ENST00000368961 | *CD164* |
| ENST00000565834 | ENST00000338995 | *COMMD4* |
| ENST00000565834 | ENST00000567195 | *COMMD4* |
| ENST00000565834 | ENST00000562789 | *COMMD4* |
| ENST00000565834 | ENST00000567377 | *COMMD4* |
| ENST00000565834 | ENST00000568301 | *COMMD4* |
| ENST00000565834 | ENST00000564815 | *COMMD4* |
| ENST00000565834 | ENST00000267935 | *COMMD4* |
| ENST00000478380 | ENST00000469391 | *DOCK8* |
| ENST00000478380 | ENST00000453981 | *DOCK8* |
| ENST00000478380 | ENST00000487230 | *DOCK8* |
| ENST00000478380 | ENST00000432829 | *DOCK8* |
| ENST00000478380 | ENST00000479404 | *DOCK8* |
| ENST00000468592 | ENST00000375255 | *DCAF17* |
| ENST00000468592 | ENST00000431110 | *DCAF17* |
| ENST00000468592 | ENST00000339506 | *DCAF17* |
| ENST00000468592 | ENST00000539783 | *DCAF17* |
| ENST00000418510 | ENST00000324198 | *ADRBK2* |
| ENST00000609953 | ENST00000397841 | *C21ORF67* |
| ENST00000609953 | ENST00000380070 | *C21ORF67* |
| ENST00000609953 | ENST00000330551 | *C21ORF67* |
| NR_033227 | ENST00000522497 | *CHTF8* |
| NR_033227 | ENST00000522091 | *CHTF8* |
| NR_033227 | ENST00000574807 | *CHTF8* |
| NR_033227 | ENST00000448552 | *CHTF8* |
| NR_033227 | ENST00000519520 | *CHTF8* |
| NR_033227 | ENST00000398235 | *CHTF8* |
| NR_033227 | ENST00000520529 | *CHTF8* |
| NR_033227 | ENST00000306585 | *CHTF8* |
| NR_033227 | ENST00000518041 | *CHTF8* |
| NR_033227 | ENST00000567763 | *CHTF8* |
| NR_033227 | ENST00000523421 | *CHTF8* |
| ENST00000521082 | ENST00000542558 | *KLHL7* |
| ENST00000521082 | ENST00000539124 | *KLHL7* |
| ENST00000521082 | ENST00000545443 | *KLHL7* |
| ENST00000521082 | ENST00000414163 | *KLHL7* |
| ENST00000521082 | ENST00000322231 | *KLHL7* |
| ENST00000521082 | ENST00000409689 | *KLHL7* |
| ENST00000521082 | ENST00000322275 | *KLHL7* |
| ENST00000521082 | ENST00000545771 | *KLHL7* |
| ENST00000521082 | ENST00000339077 | *KLHL7* |
| ENST00000521082 | ENST00000410047 | *KLHL7* |
| ENST00000562659 | ENST00000405402 | *GSE1* |
| ENST00000562659 | ENST00000253458 | *GSE1* |
| ENST00000562659 | ENST00000438180 | *GSE1* |
| ENST00000562659 | ENST00000412692 | *GSE1* |
| ENST00000562659 | ENST00000393243 | *GSE1* |
| ENST00000577596 | ENST00000251241 | *DHX40* |
| ENST00000577596 | ENST00000451169 | *DHX40* |
| ENST00000577596 | ENST00000425628 | *DHX40* |
| ENST00000577596 | ENST00000580030 | *DHX40* |
| ENST00000577596 | ENST00000584385 | *DHX40* |
| NONHSAT093188 | ENST00000495893 | *PHC3* |
| NONHSAT093188 | ENST00000484931 | *PHC3* |
| NONHSAT093188 | ENST00000494943 | *PHC3* |
| NONHSAT093188 | ENST00000475729 | *PHC3* |
| NONHSAT093188 | ENST00000467570 | *PHC3* |
| NONHSAT093188 | ENST00000466189 | *PHC3* |
| ENST00000531333 | ENST00000393150 | *CASP4* |
| ENST00000531333 | ENST00000417440 | *CASP4* |
| ENST00000531333 | ENST00000444739 | *CASP4* |
| ENST00000514237 | ENST00000303525 | *DNAJC21* |
| ENST00000514237 | ENST00000342382 | *DNAJC21* |
| ENST00000514237 | ENST00000382021 | *DNAJC21* |
| ENST00000567673 | ENST00000570164 | *C16ORF58* |
| ENST00000567673 | ENST00000430477 | *C16ORF58* |
| ENST00000567673 | ENST00000567994 | *C16ORF58* |
| ENST00000567673 | ENST00000564807 | *C16ORF58* |
| ENST00000567673 | ENST00000327237 | *C16ORF58* |
| ENST00000481285 | ENST00000371628 | *LONRF3* |
| ENST00000481285 | ENST00000439603 | *LONRF3* |
| ENST00000481285 | ENST00000304778 | *LONRF3* |
| ENST00000481285 | ENST00000422289 | *LONRF3* |
| ENST00000453535 | ENST00000398249 | *GSK3A* |
| ENST00000453535 | ENST00000594664 | *AC006486.9* |
| ENST00000453535 | ENST00000222330 | *GSK3A* |
| NR_103711 | ENST00000445861 | *PAPPA-AS1* |
| ENST00000522136 | ENST00000316308 | *CLK4* |
| ENST00000522136 | ENST00000520957 | *CLK4* |
| ENST00000485363 | ENST00000445177 | *SIK3* |
| ENST00000485363 | ENST00000292055 | *SIK3* |
| ENST00000485363 | ENST00000446921 | *SIK3* |
| ENST00000485363 | ENST00000413553 | *SIK3* |
| ENST00000485363 | ENST00000434315 | *SIK3* |
| ENST00000485363 | ENST00000375300 | *SIK3* |
| ENST00000485363 | ENST00000375288 | *SIK3* |
| ENST00000485363 | ENST00000542607 | *SIK3* |
| ENST00000483099 | ENST00000414487 | *SNRPE* |
| ENST00000483099 | ENST00000367208 | *SNRPE* |
| ENST00000518253 | ENST00000447838 | *ANKRD6* |
| ENST00000518253 | ENST00000339746 | *ANKRD6* |
| ENST00000518253 | ENST00000523798 | *ANKRD6* |
| ENST00000518253 | ENST00000492158 | *ANKRD6* |
| ENST00000518253 | ENST00000518150 | *ANKRD6* |
| ENST00000518253 | ENST00000465722 | *ANKRD6* |
| ENST00000518253 | ENST00000520458 | *ANKRD6* |
| ENST00000518253 | ENST00000485637 | *ANKRD6* |
| ENST00000518253 | ENST00000522779 | *ANKRD6* |
| ENST00000518253 | ENST00000522441 | *ANKRD6* |
| ENST00000518253 | ENST00000520793 | *ANKRD6* |
| ENST00000518253 | ENST00000521004 | *ANKRD6* |
| ENST00000518253 | ENST00000522705 | *ANKRD6* |
| ENST00000518253 | ENST00000369408 | *ANKRD6* |
| ENST00000479356 | ENST00000392650 | *SDK2* |
| ENST00000479356 | ENST00000388726 | *SDK2* |
| ENST00000479356 | ENST00000424778 | *SDK2* |
| NONHSAG018359 | ENST00000570539 | *SRRM2* |
| NONHSAG018359 | ENST00000301740 | *SRRM2* |
| ENST00000568677 | ENST00000423218 | *ITGA11* |
| ENST00000568677 | ENST00000315757 | *ITGA11* |
| ENST00000444083 | ENST00000415751 | *FAM180A* |
| ENST00000444083 | ENST00000338588 | *FAM180A* |
| ENST00000378727 | ENST00000505747 | *THUMPD2* |
| ENST00000378727 | ENST00000260619 | *THUMPD2* |
| ENST00000378727 | ENST00000454352 | *THUMPD2* |
| ENST00000480907 | ENST00000355851 | *NUB1* |
| ENST00000480907 | ENST00000413040 | *NUB1* |
| ENST00000480907 | ENST00000470229 | *NUB1* |
| ENST00000480907 | ENST00000483358 | *NUB1* |
| ENST00000480907 | ENST00000460712 | *NUB1* |
| ENST00000480907 | ENST00000568733 | *NUB1* |
| ENST00000480907 | ENST00000566856 | *NUB1* |
| ENST00000368812 | ENST00000356792 | *C10ORF137* |
| ENST00000368812 | ENST00000337623 | *C10ORF137* |
| UCSC_TCONS_00025824 | ENST00000575301 | *NLGN2* |
| ENST00000530292 | ENST00000268124 | *POLG* |
| ENST00000530292 | ENST00000442287 | *POLG* |
| ENST00000586068 | ENST00000588371 | *ZNF383* |
| ENST00000586068 | ENST00000352998 | *ZNF383* |
| ENST00000586068 | ENST00000590503 | *ZNF383* |
| ENST00000586068 | ENST00000589413 | *ZNF383* |
| ENST00000510923 | ENST00000425847 | *MRPL3* |
| ENST00000510923 | ENST00000507669 | *MRPL3* |
| ENST00000510923 | ENST00000511168 | *MRPL3* |
| ENST00000510923 | ENST00000510154 | *MRPL3* |
| ENST00000510923 | ENST00000264995 | *MRPL3* |
| ENST00000510923 | ENST00000512877 | *MRPL3* |
| NONHSAG004875 | ENST00000447569 | *EFCAB2* |
| NONHSAG004875 | ENST00000366522 | *EFCAB2* |
| ENST00000486319 | ENST00000513506 | *POLR2J3* |
| ENST00000486319 | ENST00000379357 | *POLR2J3* |
| ENST00000486319 | ENST00000511313 | *POLR2J3* |
| ENST00000486319 | ENST00000513438 | *POLR2J3* |
| ENST00000486319 | ENST00000514917 | *RP11-514P8.7* |
| ENST00000542565 | ENST00000404621 | *NCOR2* |
| ENST00000542565 | ENST00000404121 | *NCOR2* |
| ENST00000542565 | ENST00000356219 | *NCOR2* |
| ENST00000542565 | ENST00000397355 | *NCOR2* |
| ENST00000542565 | ENST00000458234 | *NCOR2* |
| ENST00000542565 | ENST00000405201 | *NCOR2* |
| ENST00000542565 | ENST00000429285 | *NCOR2* |
| ENST00000542565 | ENST00000420698 | *NCOR2* |
| UCSC_TCONS_00009946 | ENST00000507393 | *ZNF131* |
| ENST00000474723 | ENST00000321582 | *TTLL11* |
| ENST00000474723 | ENST00000373776 | *TTLL11* |
| ENST00000493559 | ENST00000453291 | *FBXW2* |
| ENST00000493559 | ENST00000340778 | *FBXW2* |
| ENST00000493559 | ENST00000608872 | *FBXW2* |
| ENST00000469310 | ENST00000431857 | *FPGS* |
| ENST00000469310 | ENST00000373225 | *FPGS* |
| ENST00000469310 | ENST00000373247 | *FPGS* |
| ENST00000469310 | ENST00000393706 | *FPGS* |
| ENST00000469310 | ENST00000423577 | *FPGS* |
| ENST00000469310 | ENST00000373228 | *FPGS* |
| ENST00000469310 | ENST00000373245 | *FPGS* |
| ENST00000492397 | ENST00000409792 | *SETD2* |
| ENST00000547459 | ENST00000395510 | *TWF1* |
| ENST00000547459 | ENST00000548315 | *TWF1* |
| ENST00000547459 | ENST00000552521 | *TWF1* |
| ENST00000547459 | ENST00000546662 | *TWF1* |
| ENST00000547459 | ENST00000548403 | *TWF1* |
| ENST00000547459 | ENST00000546506 | *TWF1* |
| ENST00000547459 | ENST00000325127 | *TWF1* |
| ENST00000470252 | ENST00000393459 | *SFXN3* |
| ENST00000470252 | ENST00000224807 | *SFXN3* |
| ENST00000372246 | ENST00000545696 | *ATG4A* |
| ENST00000372246 | ENST00000372254 | *ATG4A* |
| ENST00000372246 | ENST00000394892 | *ATG4A* |
| ENST00000372246 | ENST00000457035 | *ATG4A* |
| ENST00000372246 | ENST00000345734 | *ATG4A* |
| ENST00000372246 | ENST00000372232 | *ATG4A* |
| ENST00000531123 | ENST00000482212 | *S100PBP* |
| ENST00000531123 | ENST00000398243 | *S100PBP* |
| ENST00000531123 | ENST00000530710 | *S100PBP* |
| ENST00000531123 | ENST00000531256 | *S100PBP* |
| ENST00000531123 | ENST00000373476 | *S100PBP* |
| ENST00000531123 | ENST00000526230 | *S100PBP* |
| ENST00000531123 | ENST00000373475 | *S100PBP* |
| ENST00000531123 | ENST00000529027 | *S100PBP* |
| ENST00000531123 | ENST00000530552 | *S100PBP* |
| ENST00000460677 | ENST00000419333 | *PCYT1A* |
| ENST00000460677 | ENST00000431016 | *PCYT1A* |
| ENST00000460677 | ENST00000292823 | *PCYT1A* |
| ENST00000460677 | ENST00000441879 | *PCYT1A* |
| ENST00000460677 | ENST00000430755 | *PCYT1A* |
| ENST00000460677 | ENST00000411591 | *PCYT1A* |
| ENST00000460677 | ENST00000412869 | *PCYT1A* |
| ENST00000460677 | ENST00000443555 | *PCYT1A* |
| ENST00000460677 | ENST00000433733 | *PCYT1A* |
| ENST00000487070 | ENST00000440133 | *KANSL3* |
| ENST00000487070 | ENST00000441706 | *KANSL3* |
| ENST00000487070 | ENST00000599854 | *KANSL3* |
| ENST00000487070 | ENST00000448075 | *KANSL3* |
| ENST00000487070 | ENST00000435669 | *KANSL3* |
| ENST00000487070 | ENST00000431828 | *KANSL3* |
| NONHSAG010552 | ENST00000544053 | *EMP1* |
| NONHSAG010552 | ENST00000537612 | *EMP1* |
| NONHSAG010552 | ENST00000542474 | *EMP1* |
| NONHSAG010552 | ENST00000256951 | *EMP1* |
| NONHSAG010552 | ENST00000431267 | *EMP1* |
| NONHSAG010552 | ENST00000538364 | *EMP1* |
| NONHSAG010552 | ENST00000396301 | *EMP1* |
| ENST00000465745 | ENST00000378617 | *PIGO* |
| ENST00000465745 | ENST00000341666 | *PIGO* |
| ENST00000465745 | ENST00000298004 | *PIGO* |
| ENST00000465745 | ENST00000361778 | *PIGO* |
| ENST00000502765 | ENST00000264775 | *PPAP2A* |
| ENST00000502765 | ENST00000307259 | *PPAP2A* |
| ENST00000469684 | ENST00000538521 | *PDIA3* |
| ENST00000469684 | ENST00000300289 | *PDIA3* |
| ENST00000490399 | ENST00000337659 | *PRPF4B* |
| ENST00000490399 | ENST00000538861 | *PRPF4B* |
| ENST00000479733 | ENST00000520133 | *COL13A1* |
| ENST00000479733 | ENST00000398964 | *COL13A1* |
| ENST00000479733 | ENST00000398969 | *COL13A1* |
| ENST00000479733 | ENST00000398974 | *COL13A1* |
| ENST00000479733 | ENST00000522165 | *COL13A1* |
| ENST00000479733 | ENST00000398978 | *COL13A1* |
| ENST00000479733 | ENST00000356340 | *COL13A1* |
| ENST00000479733 | ENST00000398971 | *COL13A1* |
| ENST00000479733 | ENST00000517713 | *COL13A1* |
| ENST00000479733 | ENST00000456019 | *COL13A1* |
| ENST00000479733 | ENST00000398975 | *COL13A1* |
| ENST00000479733 | ENST00000357811 | *COL13A1* |
| ENST00000479733 | ENST00000398973 | *COL13A1* |
| ENST00000479733 | ENST00000398968 | *COL13A1* |
| ENST00000479733 | ENST00000354547 | *COL13A1* |
| ENST00000479733 | ENST00000520267 | *COL13A1* |
| ENST00000479733 | ENST00000398966 | *COL13A1* |
| ENST00000479733 | ENST00000398972 | *COL13A1* |
| ENST00000430034 | ENST00000381406 | *IGF2* |
| ENST00000430034 | ENST00000300632 | *IGF2* |
| ENST00000430034 | ENST00000416167 | *IGF2* |
| ENST00000430034 | ENST00000381395 | *IGF2* |
| NONHSAT031671 | ENST00000356219 | *NCOR2* |
| NONHSAT031671 | ENST00000397355 | *NCOR2* |
| NONHSAT031671 | ENST00000429285 | *NCOR2* |
| NONHSAT031671 | ENST00000458234 | *NCOR2* |
| NONHSAT031671 | ENST00000404121 | *NCOR2* |
| NONHSAT031671 | ENST00000404621 | *NCOR2* |
| ENST00000478971 | ENST00000244043 | *PTGIS* |
| ENST00000583901 | ENST00000427159 | *FTSJ3* |
| ENST00000464857 | ENST00000403412 | *NAA16* |
| ENST00000464857 | ENST00000379406 | *NAA16* |
| ENST00000464857 | ENST00000379367 | *NAA16* |
| ENST00000578082 | ENST00000412079 | *NARF* |
| ENST00000578082 | ENST00000580296 | *NARF* |
| ENST00000578082 | ENST00000345415 | *NARF* |
| ENST00000578082 | ENST00000579198 | *NARF* |
| ENST00000578082 | ENST00000390006 | *NARF* |
| ENST00000578082 | ENST00000584411 | *NARF* |
| ENST00000578082 | ENST00000309794 | *NARF* |
| ENST00000578082 | ENST00000577410 | *NARF* |
| ENST00000578082 | ENST00000457415 | *NARF* |
| ENST00000578082 | ENST00000577432 | *NARF* |
| ENST00000512432 | ENST00000389609 | *CCDC149* |
| ENST00000512432 | ENST00000428116 | *CCDC149* |
| ENST00000512432 | ENST00000504487 | *CCDC149* |
| ENST00000512432 | ENST00000502801 | *CCDC149* |
| ENST00000425179 | ENST00000322366 | *WDFY3* |
| ENST00000425179 | ENST00000295888 | *WDFY3* |
| ENST00000469214 | ENST00000400968 | *TROVE2* |
| ENST00000469214 | ENST00000367446 | *TROVE2* |
| ENST00000469214 | ENST00000367444 | *TROVE2* |
| ENST00000469214 | ENST00000367443 | *TROVE2* |
| ENST00000469214 | ENST00000506303 | *TROVE2* |
| ENST00000469214 | ENST00000416058 | *TROVE2* |
| ENST00000469214 | ENST00000367445 | *TROVE2* |
| ENST00000469214 | ENST00000415442 | *TROVE2* |
| ENST00000469214 | ENST00000432079 | *TROVE2* |
| ENST00000558646 | ENST00000288235 | *MYO1E* |
| ENST00000473126 | ENST00000403782 | *D2HGDH* |
| ENST00000473126 | ENST00000321264 | *D2HGDH* |
| ENST00000473126 | ENST00000432449 | *D2HGDH* |
| ENST00000473126 | ENST00000445308 | *D2HGDH* |
| ENST00000473126 | ENST00000454048 | *D2HGDH* |
| ENST00000473126 | ENST00000437164 | *D2HGDH* |
| ENST00000343968 | ENST00000355131 | *MS4A4A* |
| ENST00000343968 | ENST00000395016 | *MS4A4A* |
| ENST00000343968 | ENST00000532114 | *MS4A4A* |
| ENST00000343968 | ENST00000337908 | *MS4A4A* |
| NR_028466 | ENST00000554592 | *ATXN3* |
| NR_028466 | ENST00000393287 | *ATXN3* |
| NR_028466 | ENST00000526872 | *ATXN3* |
| NR_028466 | ENST00000340660 | *ATXN3* |
| NR_028466 | ENST00000553491 | *ATXN3* |
| NR_028466 | ENST00000557311 | *ATXN3* |
| NR_028466 | ENST00000556220 | *ATXN3* |
| NR_028466 | ENST00000503767 | *ATXN3* |
| NR_028466 | ENST00000554672 | *ATXN3* |
| NR_028466 | ENST00000502250 | *ATXN3* |
| NR_028466 | ENST00000545170 | *ATXN3* |
| NR_028466 | ENST00000429774 | *ATXN3* |
| NR_028466 | ENST00000506466 | *ATXN3* |
| NR_028466 | ENST00000532032 | *ATXN3* |
| NR_028466 | ENST00000555381 | *ATXN3* |
| ENST00000435507 | ENST00000535830 | *ATG16L2* |
| ENST00000435507 | ENST00000540222 | *ATG16L2* |
| ENST00000435507 | ENST00000321297 | *ATG16L2* |
| ENST00000435507 | ENST00000534905 | *ATG16L2* |
| ENST00000435507 | ENST00000538973 | *ATG16L2* |
| ENST00000435507 | ENST00000541367 | *ATG16L2* |
| ENST00000435507 | ENST00000540567 | *ATG16L2* |
| ENST00000435507 | ENST00000541554 | *ATG16L2* |
| ENST00000571756 | ENST00000572549 | *CORO7* |
| ENST00000571756 | ENST00000575850 | *CORO7* |
| ENST00000571756 | ENST00000573165 | *CORO7* |
| ENST00000571756 | ENST00000574025 | *CORO7* |
| ENST00000571756 | ENST00000571059 | *CORO7* |
| ENST00000571756 | ENST00000570645 | *CORO7* |
| ENST00000571756 | ENST00000572044 | *CORO7* |
| ENST00000571756 | ENST00000539968 | *CORO7* |
| ENST00000571756 | ENST00000571052 | *CORO7* |
| ENST00000571756 | ENST00000576051 | *CORO7* |
| ENST00000571756 | ENST00000423908 | *CORO7* |
| ENST00000571756 | ENST00000572898 | *CORO7* |
| ENST00000571756 | ENST00000537233 | *CORO7* |
| ENST00000571756 | ENST00000251166 | *CORO7* |
| ENST00000571756 | ENST00000575038 | *CORO7* |
| ENST00000571756 | ENST00000572467 | *CORO7-PAM16* |
| ENST00000478597 | ENST00000497375 | *DPP7* |
| ENST00000478597 | ENST00000371579 | *DPP7* |
| ENST00000478597 | ENST00000463619 | *DPP7* |
| ENST00000478597 | ENST00000473703 | *DPP7* |
| ENST00000553528 | ENST00000348956 | *CKB* |
| ENST00000553528 | ENST00000553610 | *CKB* |
| ENST00000553528 | ENST00000555039 | *CKB* |
| ENST00000553528 | ENST00000553878 | *CKB* |
| NONHSAT091225 | ENST00000393845 | *WDR52* |
| ENST00000528278 | ENST00000354520 | *KMT2A* |
| ENST00000528278 | ENST00000389506 | *KMT2A* |
| ENST00000528278 | ENST00000534358 | *KMT2A* |
| ENST00000563285 | ENST00000492830 | *AMFR* |
| ENST00000563285 | ENST00000567738 | *AMFR* |
| ENST00000563285 | ENST00000290649 | *AMFR* |
| ENST00000479806 | ENST00000340296 | *DYNC1I2* |
| ENST00000479806 | ENST00000435234 | *DYNC1I2* |
| ENST00000479806 | ENST00000410079 | *DYNC1I2* |
| ENST00000479806 | ENST00000263811 | *DYNC1I2* |
| ENST00000479806 | ENST00000409453 | *DYNC1I2* |
| ENST00000479806 | ENST00000358002 | *DYNC1I2* |
| ENST00000479806 | ENST00000534253 | *DYNC1I2* |
| ENST00000479806 | ENST00000397119 | *DYNC1I2* |
| ENST00000479806 | ENST00000409197 | *DYNC1I2* |
| ENST00000479806 | ENST00000409317 | *DYNC1I2* |
| ENST00000479806 | ENST00000409773 | *DYNC1I2* |
| ENST00000479806 | ENST00000508530 | *DYNC1I2* |
| ENST00000587938 | ENST00000392313 | *MAU2* |
| ENST00000587938 | ENST00000609060 | *MAU2* |
| ENST00000587938 | ENST00000262815 | *MAU2* |
| ENST00000465524 | ENST00000407032 | *NUCB1* |
| ENST00000465524 | ENST00000424608 | *NUCB1* |
| ENST00000465524 | ENST00000452087 | *NUCB1* |
| ENST00000465524 | ENST00000405315 | *NUCB1* |
| ENST00000465524 | ENST00000263273 | *NUCB1* |
| ENST00000497054 | ENST00000409969 | *MOB1A* |
| ENST00000497054 | ENST00000396049 | *MOB1A* |
| ENST00000497219 | ENST00000405485 | *PSTK* |
| ENST00000497219 | ENST00000406217 | *PSTK* |
| ENST00000497219 | ENST00000368887 | *PSTK* |
| ENST00000532883 | ENST00000529734 | *PHF21A* |
| ENST00000532883 | ENST00000533757 | *PHF21A* |
| ENST00000532883 | ENST00000529782 | *PHF21A* |
| ENST00000532883 | ENST00000418153 | *PHF21A* |
| ENST00000532883 | ENST00000532010 | *PHF21A* |
| ENST00000532883 | ENST00000527782 | *PHF21A* |
| ENST00000532883 | ENST00000531959 | *PHF21A* |
| ENST00000532883 | ENST00000323180 | *PHF21A* |
| ENST00000532883 | ENST00000524497 | *PHF21A* |
| ENST00000532883 | ENST00000257821 | *PHF21A* |
| ENST00000532883 | ENST00000525438 | *PHF21A* |
| ENST00000563541 | ENST00000443381 | *ZNF276* |
| ENST00000563541 | ENST00000289816 | *ZNF276* |
| ENST00000563541 | ENST00000568064 | *ZNF276* |
| ENST00000563541 | ENST00000446326 | *ZNF276* |
| ENST00000544752 | ENST00000555456 | *GPHN* |
| ENST00000544752 | ENST00000315266 | *GPHN* |
| ENST00000544752 | ENST00000543237 | *GPHN* |
| ENST00000544752 | ENST00000556240 | *GPHN* |
| ENST00000544752 | ENST00000305960 | *GPHN* |
| ENST00000544752 | ENST00000555503 | *GPHN* |
| ENST00000544752 | ENST00000459628 | *GPHN* |
| ENST00000544752 | ENST00000478722 | *GPHN* |
| ENST00000462359 | ENST00000317669 | *SLC38A5* |
| ENST00000462359 | ENST00000376876 | *SLC38A5* |
| ENST00000462359 | ENST00000376875 | *SLC38A5* |
| ENST00000489049 | ENST00000444997 | *PDCD4* |
| ENST00000489049 | ENST00000280154 | *PDCD4* |
| ENST00000489049 | ENST00000393104 | *PDCD4* |
| NONHSAG018629 | ENST00000399147 | *RP11-166B2.1* |
| NONHSAG018629 | ENST00000547494 | *RP11-166B2.1* |
| ENST00000483519 | ENST00000450966 | *USP40* |
| ENST00000483519 | ENST00000430158 | *USP40* |
| ENST00000483519 | ENST00000454354 | *USP40* |
| ENST00000483519 | ENST00000427112 | *USP40* |
| ENST00000483519 | ENST00000251722 | *USP40* |
| ENST00000505630 | ENST00000507646 | *ARL15* |
| ENST00000505630 | ENST00000502271 | *ARL15* |
| ENST00000505630 | ENST00000504924 | *ARL15* |
| ENST00000550106 | ENST00000397792 | *VEZT* |
| ENST00000550106 | ENST00000552821 | *VEZT* |
| ENST00000550106 | ENST00000261219 | *VEZT* |
| ENST00000550106 | ENST00000551311 | *VEZT* |
| ENST00000550106 | ENST00000551472 | *VEZT* |
| ENST00000550106 | ENST00000549002 | *VEZT* |
| ENST00000550106 | ENST00000436874 | *VEZT* |
| ENST00000550106 | ENST00000546445 | *VEZT* |
| ENST00000534185 | ENST00000528591 | *SOX13* |
| ENST00000534185 | ENST00000367204 | *SOX13* |
| ENST00000369635 | ENST00000509338 | *SNX14* |
| ENST00000369635 | ENST00000505648 | *SNX14* |
| ENST00000369635 | ENST00000418862 | *SNX14* |
| ENST00000369635 | ENST00000346348 | *SNX14* |
| ENST00000369635 | ENST00000514419 | *SNX14* |
| ENST00000369635 | ENST00000513865 | *SNX14* |
| ENST00000369635 | ENST00000369627 | *SNX14* |
| ENST00000369635 | ENST00000314673 | *SNX14* |
| ENST00000369635 | ENST00000508658 | *SNX14* |
| ENST00000369635 | ENST00000515216 | *SNX14* |
| ENST00000505986 | ENST00000544359 | *PGM2* |
| ENST00000505986 | ENST00000537241 | *PGM2* |
| ENST00000505986 | ENST00000381967 | *PGM2* |
| ENST00000495828 | ENST00000537474 | *ERI3* |
| ENST00000495828 | ENST00000372257 | *ERI3* |
| ENST00000495828 | ENST00000457571 | *ERI3* |
| ENST00000495828 | ENST00000452396 | *ERI3* |
| ENST00000495828 | ENST00000456170 | *ERI3* |
| ENST00000495828 | ENST00000372259 | *ERI3* |
| ENST00000483151 | ENST00000425946 | *RGL2* |
| ENST00000483151 | ENST00000444031 | *RGL2* |
| ENST00000483151 | ENST00000497454 | *RGL2* |
| ENST00000557682 | ENST00000556722 | *CHD2* |
| ENST00000485161 | ENST00000483733 | *RABL3* |
| ENST00000485161 | ENST00000273375 | *RABL3* |
| ENST00000504697 | ENST00000505609 | *CCNI* |
| ENST00000504697 | ENST00000507788 | *CCNI* |
| ENST00000504697 | ENST00000537948 | *CCNI* |
| ENST00000504697 | ENST00000513774 | *CCNI* |
| ENST00000504697 | ENST00000237654 | *CCNI* |
| NONHSAG037266 | ENST00000324803 | *CRIPAK* |
| ENST00000566755 | ENST00000285737 | *LONP2* |
| ENST00000566755 | ENST00000535754 | *LONP2* |
| ENST00000566755 | ENST00000565867 | *LONP2* |
| NONHSAT018001 | ENST00000526852 | *ZBED5* |
| NONHSAT018001 | ENST00000528289 | *ZBED5* |
| NONHSAT018001 | ENST00000432999 | *ZBED5* |
| NONHSAT018001 | ENST00000534690 | *ZBED5* |
| NONHSAT018001 | ENST00000413761 | *ZBED5* |
| NONHSAT018001 | ENST00000526020 | *ZBED5* |
| ENST00000589759 | ENST00000546249 | *ATP6V0A1* |
| ENST00000589759 | ENST00000343619 | *ATP6V0A1* |
| ENST00000589759 | ENST00000537728 | *ATP6V0A1* |
| ENST00000589759 | ENST00000393829 | *ATP6V0A1* |
| ENST00000589759 | ENST00000264649 | *ATP6V0A1* |
| ENST00000589759 | ENST00000589727 | *ATP6V0A1* |
| ENST00000589759 | ENST00000585525 | *ATP6V0A1* |
| ENST00000589759 | ENST00000544137 | *ATP6V0A1* |
| ENST00000449543 | ENST00000420925 | *MTMR14* |
| ENST00000480732 | ENST00000342754 | *NEXN* |
| ENST00000480732 | ENST00000440324 | *NEXN* |
| ENST00000480732 | ENST00000457030 | *NEXN* |
| ENST00000480732 | ENST00000330010 | *NEXN* |
| ENST00000480732 | ENST00000401035 | *NEXN* |
| ENST00000480732 | ENST00000334785 | *NEXN* |
| ENST00000462959 | ENST00000432605 | *C2ORF74* |
| ENST00000462959 | ENST00000426997 | *C2ORF74* |
| ENST00000462959 | ENST00000356719 | *KIAA1841* |
| ENST00000462959 | ENST00000402291 | *KIAA1841* |
| ENST00000462959 | ENST00000295031 | *KIAA1841* |
| ENST00000462959 | ENST00000453873 | *KIAA1841* |
| ENST00000533331 | ENST00000418988 | *PSMA1* |
| ENST00000533331 | ENST00000396393 | *PSMA1* |
| ENST00000533331 | ENST00000530457 | *PSMA1* |
| ENST00000533331 | ENST00000533068 | *PSMA1* |
| ENST00000533331 | ENST00000419365 | *PSMA1* |
| ENST00000533331 | ENST00000532256 | *PSMA1* |
| ENST00000533331 | ENST00000396394 | *PSMA1* |
| NR_033659 | ENST00000555375 | *STAT6* |
| NR_033659 | ENST00000553397 | *STAT6* |
| NR_033659 | ENST00000555318 | *STAT6* |
| NR_033659 | ENST00000300134 | *STAT6* |
| NR_033659 | ENST00000454075 | *STAT6* |
| NR_033659 | ENST00000557635 | *STAT6* |
| NR_033659 | ENST00000553533 | *STAT6* |
| NR_033659 | ENST00000554663 | *STAT6* |
| NR_033659 | ENST00000556155 | *STAT6* |
| NR_033659 | ENST00000553499 | *STAT6* |
| NR_033659 | ENST00000553275 | *STAT6* |
| NR_033659 | ENST00000543873 | *STAT6* |
| NR_033659 | ENST00000554825 | *STAT6* |
| NR_033659 | ENST00000538913 | *STAT6* |
| NR_033659 | ENST00000556259 | *STAT6* |
| NR_033659 | ENST00000555849 | *STAT6* |
| NR_033659 | ENST00000537215 | *STAT6* |
| ENST00000464096 | ENST00000454300 | *TANC1* |
| ENST00000464096 | ENST00000263635 | *TANC1* |
| ENST00000545506 | ENST00000537743 | *CARS2* |
| ENST00000545506 | ENST00000257347 | *CARS2* |
| ENST00000554680 | ENST00000338631 | *ACIN1* |
| ENST00000554680 | ENST00000555053 | *ACIN1* |
| ENST00000554680 | ENST00000557515 | *ACIN1* |
| ENST00000554680 | ENST00000457657 | *ACIN1* |
| ENST00000554680 | ENST00000555566 | *ACIN1* |
| ENST00000554680 | ENST00000605057 | *ACIN1* |
| ENST00000554680 | ENST00000397341 | *ACIN1* |
| ENST00000554680 | ENST00000357481 | *ACIN1* |
| ENST00000554680 | ENST00000262710 | *ACIN1* |
| ENST00000518315 | ENST00000440756 | *PSD3* |
| ENST00000518315 | ENST00000519851 | *PSD3* |
| ENST00000518315 | ENST00000521027 | *PSD3* |
| ENST00000518315 | ENST00000286485 | *PSD3* |
| ENST00000518315 | ENST00000523619 | *PSD3* |
| ENST00000518315 | ENST00000428502 | *PSD3* |
| ENST00000518315 | ENST00000520858 | *PSD3* |
| ENST00000518315 | ENST00000327040 | *PSD3* |
| ENST00000476047 | ENST00000487694 | *ROBO2* |
| ENST00000476047 | ENST00000602589 | *ROBO2* |
| NONHSAT086678 | ENST00000396832 | *CSNK1E* |
| NONHSAT086678 | ENST00000366216 | *CSNK1E* |
| NONHSAT086678 | ENST00000403904 | *CSNK1E* |
| NONHSAT086678 | ENST00000359867 | *CSNK1E* |
| NONHSAT086678 | ENST00000400206 | *CSNK1E* |
| NONHSAT086678 | ENST00000431632 | *CSNK1E* |
| ENST00000264128 | ENST00000569674 | *SLC25A24* |
| ENST00000264128 | ENST00000565488 | *SLC25A24* |
| ENST00000264128 | ENST00000370041 | *SLC25A24* |
| NR_103796 | ENST00000356577 | *SON* |
| NR_103796 | ENST00000381692 | *SON* |
| NR_103796 | ENST00000290239 | *SON* |
| NR_103796 | ENST00000421541 | *SON* |
| NR_103796 | ENST00000381679 | *SON* |
| NR_103796 | ENST00000300278 | *SON* |
| NR_103796 | ENST00000436227 | *SON* |
| ENST00000430838 | ENST00000494380 | *ZNF138* |
| ENST00000430838 | ENST00000397136 | *ZNF138* |
| ENST00000430838 | ENST00000440155 | *ZNF138* |
| ENST00000430838 | ENST00000359735 | *ZNF138* |
| ENST00000430838 | ENST00000307355 | *ZNF138* |
| ENST00000430838 | ENST00000437743 | *ZNF138* |
| ENST00000430838 | ENST00000440598 | *ZNF138* |
| ENST00000551544 | ENST00000540990 | *CACNB3* |
| ENST00000551544 | ENST00000547230 | *CACNB3* |
| ENST00000551544 | ENST00000547818 | *CACNB3* |
| ENST00000551544 | ENST00000547392 | *CACNB3* |
| ENST00000551544 | ENST00000548279 | *CACNB3* |
| ENST00000551544 | ENST00000536187 | *CACNB3* |
| ENST00000551544 | ENST00000301050 | *CACNB3* |
| ENST00000551544 | ENST00000550064 | *CACNB3* |
| ENST00000551544 | ENST00000550190 | *CACNB3* |
| NR_104018 | ENST00000580584 | *PMP22* |
| NR_104018 | ENST00000395936 | *PMP22* |
| NR_104018 | ENST00000312280 | *PMP22* |
| NR_104018 | ENST00000395938 | *PMP22* |
| NR_104018 | ENST00000494511 | *PMP22* |
| NR_104018 | ENST00000426385 | *PMP22* |
| ENST00000462640 | ENST00000403888 | *KCTD17* |
| ENST00000462640 | ENST00000402077 | *KCTD17* |
| ENST00000462640 | ENST00000456470 | *KCTD17* |
| ENST00000504520 | ENST00000507051 | *SEC31A* |
| ENST00000504520 | ENST00000507676 | *SEC31A* |
| ENST00000504520 | ENST00000506495 | *SEC31A* |
| ENST00000504520 | ENST00000503210 | *SEC31A* |
| ENST00000504520 | ENST00000355196 | *SEC31A* |
| ENST00000488683 | ENST00000374379 | *CLIC4* |
| ENST00000607464 | ENST00000435829 | *OXNAD1* |
| ENST00000607464 | ENST00000544043 | *OXNAD1* |
| ENST00000607464 | ENST00000606098 | *OXNAD1* |
| ENST00000607464 | ENST00000605932 | *OXNAD1* |
| ENST00000544214 | ENST00000398526 | *ZNF705A* |
| ENST00000594847 | ENST00000594287 | *STRN4* |
| ENST00000594847 | ENST00000391910 | *STRN4* |
| ENST00000594847 | ENST00000597021 | *STRN4* |
| ENST00000594847 | ENST00000263280 | *STRN4* |
| ENST00000594847 | ENST00000539396 | *STRN4* |
| ENST00000594847 | ENST00000597063 | *STRN4* |
| ENST00000594847 | ENST00000596012 | *STRN4* |
| ENST00000594847 | ENST00000593979 | *STRN4* |
| ENST00000568689 | ENST00000562824 | *JMJD8* |
| ENST00000568689 | ENST00000293882 | *JMJD8* |
| ENST00000568689 | ENST00000412368 | *JMJD8* |
| ENST00000568689 | ENST00000454700 | *JMJD8* |
| ENST00000568689 | ENST00000562111 | *JMJD8* |
| ENST00000568689 | ENST00000609261 | *JMJD8* |
| ENST00000482967 | ENST00000544843 | *CDK5RAP1* |
| ENST00000482967 | ENST00000473997 | *CDK5RAP1* |
| ENST00000482967 | ENST00000427097 | *CDK5RAP1* |
| ENST00000482967 | ENST00000357886 | *CDK5RAP1* |
| ENST00000482967 | ENST00000346416 | *CDK5RAP1* |
| ENST00000482967 | ENST00000339269 | *CDK5RAP1* |
| ENST00000580871 | ENST00000327564 | *LRRC37B* |
| ENST00000580871 | ENST00000341671 | *LRRC37B* |
| ENST00000580871 | ENST00000543378 | *LRRC37B* |
| ENST00000580871 | ENST00000584368 | *LRRC37B* |
| ENST00000580871 | ENST00000394713 | *LRRC37B* |
| ENST00000481320 | ENST00000369017 | *NSMCE4A* |
| ENST00000481320 | ENST00000538652 | *NSMCE4A* |
| ENST00000481320 | ENST00000369023 | *NSMCE4A* |
| ENST00000465118 | ENST00000370630 | *CTBS* |
| ENST00000560458 | ENST00000439052 | *BNIP2* |
| ENST00000560458 | ENST00000607373 | *BNIP2* |
| ENST00000560458 | ENST00000415213 | *BNIP2* |
| ENST00000560458 | ENST00000267859 | *BNIP2* |
| ENST00000530298 | ENST00000524377 | *NTRK1* |
| ENST00000530298 | ENST00000368196 | *NTRK1* |
| ENST00000530298 | ENST00000392302 | *NTRK1* |
| ENST00000530298 | ENST00000358660 | *NTRK1* |
| ENST00000563741 | ENST00000301717 | *SPSB3* |
| ENST00000563741 | ENST00000569769 | *SPSB3* |
| ENST00000563741 | ENST00000566339 | *SPSB3* |
| ENST00000525661 | ENST00000529708 | *BTBD10* |
| ENST00000525661 | ENST00000530907 | *BTBD10* |
| ENST00000525661 | ENST00000526841 | *BTBD10* |
| ENST00000525661 | ENST00000278174 | *BTBD10* |
| ENST00000525661 | ENST00000528120 | *BTBD10* |
| ENST00000373899 | ENST00000395377 | *TFAM* |
| ENST00000373899 | ENST00000487519 | *TFAM* |
| ENST00000373899 | ENST00000373895 | *TFAM* |
| ENST00000452549 | ENST00000371847 | *SPATA6* |
| ENST00000452549 | ENST00000396199 | *SPATA6* |
| ENST00000452549 | ENST00000371841 | *SPATA6* |
| ENST00000452549 | ENST00000371843 | *SPATA6* |
| NR_030775 | ENST00000362011 | *SHISA4* |
| ENST00000498075 | ENST00000369239 | *PNISR* |
| ENST00000498075 | ENST00000438806 | *PNISR* |
| NONHSAT115417 | ENST00000438092 | *SHPRH* |
| NONHSAT115417 | ENST00000275233 | *SHPRH* |
| NONHSAT115417 | ENST00000367503 | *SHPRH* |
| NONHSAT115417 | ENST00000367505 | *SHPRH* |
| ENST00000463690 | ENST00000326446 | *ARL6IP6* |
| NONHSAT041711 | ENST00000561317 | *SPRED1* |
| NONHSAT041711 | ENST00000299084 | *SPRED1* |
| ENST00000563168 | ENST00000563953 | *TMEM208* |
| ENST00000563168 | ENST00000565201 | *TMEM208* |
| ENST00000563168 | ENST00000304800 | *TMEM208* |
| ENST00000478416 | ENST00000579294 | *FLII* |
| ENST00000478416 | ENST00000581349 | *FLII* |
| ENST00000478416 | ENST00000327031 | *FLII* |
| ENST00000478416 | ENST00000578558 | *FLII* |
| ENST00000478416 | ENST00000473425 | *FLII* |
| ENST00000478416 | ENST00000545457 | *FLII* |
| ENST00000478416 | ENST00000488932 | *FLII* |
| ENST00000478416 | ENST00000577485 | *FLII* |
| ENST00000478416 | ENST00000379450 | *FLII* |
| ENST00000503165 | ENST00000230640 | *SKIV2L2* |
| ENST00000503165 | ENST00000545714 | *SKIV2L2* |
| ENST00000523752 | ENST00000276431 | *TNFRSF10B* |
| ENST00000523752 | ENST00000542226 | *TNFRSF10B* |
| ENST00000523752 | ENST00000347739 | *TNFRSF10B* |
| ENST00000469769 | ENST00000457183 | *THBS3* |
| ENST00000469769 | ENST00000541990 | *THBS3* |
| ENST00000469769 | ENST00000368378 | *THBS3* |
| ENST00000469769 | ENST00000541576 | *THBS3* |
| ENST00000465205 | ENST00000465979 | *WDR31* |
| ENST00000465205 | ENST00000374193 | *WDR31* |
| ENST00000465205 | ENST00000374195 | *WDR31* |
| ENST00000465205 | ENST00000341761 | *WDR31* |
| ENST00000556502 | ENST00000406949 | *PCNXL4* |
| ENST00000430942 | ENST00000395831 | *POLM* |
| ENST00000430942 | ENST00000414235 | *POLM* |
| ENST00000430942 | ENST00000335195 | *POLM* |
| ENST00000430942 | ENST00000242248 | *POLM* |
| ENST00000430942 | ENST00000452049 | *POLM* |
| NR_047689 | ENST00000432123 | *PHKG1* |
| NR_047689 | ENST00000537360 | *PHKG1* |
| NR_047689 | ENST00000452681 | *PHKG1* |
| NR_047689 | ENST00000446428 | *PHKG1* |
| NR_047689 | ENST00000297373 | *PHKG1* |
| ENST00000403379 | ENST00000367853 | *MPZL1* |
| ENST00000403379 | ENST00000392121 | *MPZL1* |
| ENST00000403379 | ENST00000474859 | *MPZL1* |
| ENST00000403379 | ENST00000359523 | *MPZL1* |
| ENST00000484706 | ENST00000356860 | *CACNA2D1* |
| ENST00000484706 | ENST00000356253 | *CACNA2D1* |
| ENST00000484706 | ENST00000423588 | *CACNA2D1* |
| ENST00000597936 | ENST00000221448 | *SNRNP70* |
| ENST00000597936 | ENST00000598441 | *SNRNP70* |
| ENST00000597936 | ENST00000598984 | *SNRNP70* |
| ENST00000597936 | ENST00000601411 | *SNRNP70* |
| ENST00000371587 | ENST00000474902 | *MAN1B1* |
| ENST00000371587 | ENST00000371589 | *MAN1B1* |
| ENST00000371587 | ENST00000540346 | *MAN1B1* |
| ENST00000371587 | ENST00000535144 | *MAN1B1* |
| ENST00000371587 | ENST00000542372 | *MAN1B1* |
| ENST00000575556 | ENST00000574576 | *PSMB10* |
| ENST00000575556 | ENST00000358514 | *PSMB10* |
| ENST00000496423 | ENST00000283290 | *ATG3* |
| ENST00000496423 | ENST00000402314 | *ATG3* |
| ENST00000496423 | ENST00000492886 | *ATG3* |
| ENST00000570304 | ENST00000574576 | *PSMB10* |
| ENST00000570304 | ENST00000358514 | *PSMB10* |
| ENST00000508737 | ENST00000515037 | *FAM114A1* |
| ENST00000508737 | ENST00000358869 | *FAM114A1* |
| ENST00000482463 | ENST00000468711 | *COX7A2L* |
| ENST00000482463 | ENST00000463055 | *COX7A2L* |
| ENST00000482463 | ENST00000234301 | *COX7A2L* |
| ENST00000482463 | ENST00000378669 | *COX7A2L* |
| ENST00000446924 | ENST00000455867 | *BRWD1* |
| ENST00000446924 | ENST00000380800 | *BRWD1* |
| ENST00000446924 | ENST00000333229 | *BRWD1* |
| ENST00000446924 | ENST00000424441 | *BRWD1* |
| ENST00000446924 | ENST00000342449 | *BRWD1* |
| ENST00000441402 | ENST00000438825 | *TMEM39B* |
| ENST00000441402 | ENST00000427288 | *TMEM39B* |
| ENST00000441402 | ENST00000373634 | *TMEM39B* |
| ENST00000441402 | ENST00000456834 | *TMEM39B* |
| ENST00000441402 | ENST00000336294 | *TMEM39B* |
| ENST00000551094 | ENST00000266984 | *CCDC65* |
| NONHSAT033213 | ENST00000379826 | *SMAD9* |
| NONHSAT033213 | ENST00000350148 | *SMAD9* |
| NONHSAT033213 | ENST00000399275 | *SMAD9* |
| ENST00000584706 | ENST00000340116 | *ENOSF1* |
| ENST00000584706 | ENST00000580982 | *ENOSF1* |
| ENST00000584706 | ENST00000251101 | *ENOSF1* |
| ENST00000584706 | ENST00000319815 | *ENOSF1* |
| ENST00000584706 | ENST00000383578 | *ENOSF1* |
| ENST00000475226 | ENST00000380315 | *HBB* |
| ENST00000475226 | ENST00000335295 | *HBB* |
| ENST00000565467 | ENST00000570014 | *LMF1* |
| ENST00000547140 | ENST00000547291 | *DUSP6* |
| ENST00000547140 | ENST00000279488 | *DUSP6* |
| ENST00000547140 | ENST00000308385 | *DUSP6* |
| NR_052013 | ENST00000429842 | *NBAS* |
| NR_052013 | ENST00000281513 | *NBAS* |
| NR_052013 | ENST00000442506 | *NBAS* |
| NR_052013 | ENST00000423602 | *NBAS* |
| NR_052013 | ENST00000441755 | *NBAS* |
| NR_052013 | ENST00000441750 | *NBAS* |
| NR_052013 | ENST00000417461 | *NBAS* |
| NR_052013 | ENST00000433283 | *NBAS* |
| ENST00000392963 | ENST00000430580 | *NBPF1* |
| ENST00000392963 | ENST00000432949 | *NBPF1* |
| ENST00000392963 | ENST00000420031 | *NBPF1* |
| ENST00000392963 | ENST00000287968 | *NBPF1* |
| ENST00000441556 | ENST00000412853 | *CTTNBP2* |
| ENST00000441556 | ENST00000434890 | *CTTNBP2* |
| ENST00000441556 | ENST00000454375 | *CTTNBP2* |
| ENST00000441556 | ENST00000446636 | *CTTNBP2* |
| ENST00000441556 | ENST00000416239 | *CTTNBP2* |
| ENST00000441556 | ENST00000435233 | *CTTNBP2* |
| ENST00000441556 | ENST00000160373 | *CTTNBP2* |
| ENST00000488362 | ENST00000375348 | *TMEM255B* |
| ENST00000488362 | ENST00000375353 | *TMEM255B* |
| ENST00000532540 | ENST00000370399 | *TGFBR3* |
| ENST00000532540 | ENST00000417833 | *TGFBR3* |
| ENST00000532540 | ENST00000465892 | *TGFBR3* |
| ENST00000532540 | ENST00000212355 | *TGFBR3* |
| ENST00000532540 | ENST00000525962 | *TGFBR3* |
| ENST00000485800 | ENST00000370345 | *SEC31B* |
| ENST00000418446 | ENST00000542041 | *ABHD4* |
| ENST00000418446 | ENST00000216327 | *ABHD4* |
| ENST00000418446 | ENST00000545034 | *ABHD4* |
| ENST00000418446 | ENST00000428304 | *ABHD4* |
| NR_104586 | ENST00000375758 | *ANKRD10* |
| NR_104586 | ENST00000310847 | *ANKRD10* |
| NR_104586 | ENST00000603993 | *ANKRD10* |
| NR_104586 | ENST00000267339 | *ANKRD10* |
| ENST00000552994 | ENST00000552037 | *ZFC3H1* |
| ENST00000552994 | ENST00000548100 | *ZFC3H1* |
| ENST00000552994 | ENST00000378743 | *ZFC3H1* |
| ENST00000537784 | ENST00000382722 | *CACNA2D4* |
| ENST00000537784 | ENST00000585732 | *CACNA2D4* |
| ENST00000537784 | ENST00000587995 | *CACNA2D4* |
| ENST00000537784 | ENST00000585708 | *CACNA2D4* |
| ENST00000537784 | ENST00000538027 | *CACNA2D4* |
| ENST00000537784 | ENST00000536846 | *CACNA2D4* |
| ENST00000537784 | ENST00000588077 | *CACNA2D4* |
| ENST00000537784 | ENST00000538450 | *CACNA2D4* |
| ENST00000537784 | ENST00000586184 | *CACNA2D4* |
| ENST00000416471 | ENST00000409444 | *TMEM237* |
| ENST00000416471 | ENST00000409883 | *TMEM237* |
| ENST00000502462 | ENST00000355943 | *SLC25A46* |
| ENST00000502462 | ENST00000509432 | *SLC25A46* |
| ENST00000502462 | ENST00000447245 | *SLC25A46* |
| ENST00000502462 | ENST00000513807 | *SLC25A46* |
| ENST00000502462 | ENST00000504098 | *SLC25A46* |
| ENST00000502462 | ENST00000509442 | *SLC25A46* |
| ENST00000382688 | ENST00000558858 | *C15ORF52* |
| ENST00000382688 | ENST00000559313 | *C15ORF52* |
| ENST00000382688 | ENST00000560922 | *C15ORF52* |
| ENST00000382688 | ENST00000397536 | *C15ORF52* |
| ENST00000486700 | ENST00000409455 | *LIMS2* |
| ENST00000486700 | ENST00000410011 | *LIMS2* |
| ENST00000486700 | ENST00000355119 | *LIMS2* |
| ENST00000486700 | ENST00000545738 | *LIMS2* |
| ENST00000486700 | ENST00000324938 | *LIMS2* |
| ENST00000486700 | ENST00000409808 | *LIMS2* |
| ENST00000436711 | ENST00000289921 | *FAM160B2* |
| NONHSAT024268 | ENST00000535700 | *ZBTB16* |
| NONHSAT024268 | ENST00000335953 | *ZBTB16* |
| NONHSAG006474 | ENST00000371927 | *STAMBPL1* |
| ENST00000468112 | ENST00000405930 | *ZDHHC8* |
| ENST00000468112 | ENST00000334554 | *ZDHHC8* |
| ENST00000468112 | ENST00000320602 | *ZDHHC8* |
| ENST00000530726 | ENST00000397420 | *CD151* |
| ENST00000530726 | ENST00000397421 | *CD151* |
| ENST00000530726 | ENST00000526439 | *CD151* |
| ENST00000530726 | ENST00000528011 | *CD151* |
| ENST00000530726 | ENST00000529810 | *CD151* |
| ENST00000530726 | ENST00000528867 | *CD151* |
| ENST00000530726 | ENST00000526693 | *CD151* |
| ENST00000530726 | ENST00000525718 | *CD151* |
| ENST00000530726 | ENST00000322008 | *CD151* |
| ENST00000530726 | ENST00000524748 | *CD151* |
| ENST00000530726 | ENST00000530320 | *CD151* |
| ENST00000530726 | ENST00000525333 | *CD151* |
| ENST00000530726 | ENST00000527341 | *CD151* |
| ENST00000548578 | ENST00000549884 | *BAZ2A* |
| ENST00000548578 | ENST00000179765 | *BAZ2A* |
| ENST00000548578 | ENST00000379441 | *BAZ2A* |
| ENST00000548578 | ENST00000551812 | *BAZ2A* |
| ENST00000548578 | ENST00000547650 | *BAZ2A* |
| ENST00000532837 | ENST00000524564 | *SIRT3* |
| ENST00000532837 | ENST00000525776 | *SIRT3* |
| ENST00000532837 | ENST00000529382 | *SIRT3* |
| ENST00000532837 | ENST00000382743 | *SIRT3* |
| ENST00000532837 | ENST00000532956 | *SIRT3* |
| ENST00000532837 | ENST00000525237 | *SIRT3* |
| ENST00000532837 | ENST00000528469 | *SIRT3* |
| ENST00000532837 | ENST00000525319 | *SIRT3* |
| ENST00000600235 | ENST00000598792 | *CPAMD8* |
| ENST00000600235 | ENST00000443236 | *CPAMD8* |
| ENST00000600235 | ENST00000594249 | *CPAMD8* |
| ENST00000600235 | ENST00000599287 | *CPAMD8* |
| ENST00000460520 | ENST00000461497 | *PLOD2* |
| ENST00000460520 | ENST00000282903 | *PLOD2* |
| ENST00000460520 | ENST00000494950 | *PLOD2* |
| ENST00000460520 | ENST00000360060 | *PLOD2* |
| ENST00000494584 | ENST00000372211 | *UCK1* |
| ENST00000494584 | ENST00000372215 | *UCK1* |
| ENST00000494584 | ENST00000372208 | *UCK1* |
| ENST00000494584 | ENST00000372210 | *UCK1* |
| ENST00000530179 | ENST00000420732 | *MS4A6A* |
| ENST00000530179 | ENST00000532169 | *MS4A6A* |
| ENST00000530179 | ENST00000412309 | *MS4A6A* |
| ENST00000530179 | ENST00000534596 | *MS4A6A* |
| ENST00000530179 | ENST00000528851 | *MS4A6A* |
| ENST00000530179 | ENST00000426738 | *MS4A6A* |
| ENST00000530179 | ENST00000323961 | *MS4A6A* |
| ENST00000530179 | ENST00000533409 | *MS4A6A* |
| ENST00000530179 | ENST00000533023 | *MS4A6A* |
| ENST00000530179 | ENST00000530839 | *MS4A6A* |
| ENST00000530179 | ENST00000533989 | *MS4A6A* |
| ENST00000530179 | ENST00000531531 | *MS4A6A* |
| ENST00000530179 | ENST00000529054 | *MS4A6A* |
| ENST00000530529 | ENST00000434945 | *KDELC2* |
| ENST00000530529 | ENST00000323468 | *KDELC2* |
| ENST00000530529 | ENST00000375648 | *KDELC2* |
| ENST00000530529 | ENST00000530318 | *KDELC2* |
| NONHSAG040401 | ENST00000307259 | *PPAP2A* |
| NONHSAG040401 | ENST00000264775 | *PPAP2A* |
| NONHSAG020104 | ENST00000539778 | *CMIP* |
| NONHSAG020104 | ENST00000537098 | *CMIP* |
| NONHSAG020104 | ENST00000398040 | *CMIP* |
| ENST00000513139 | ENST00000503362 | *SPCS3* |
| ENST00000428388 | ENST00000395523 | *PPT2* |
| ENST00000428388 | ENST00000395512 | *EGFL8* |
| ENST00000428388 | ENST00000445576 | *PPT2* |
| ENST00000428388 | ENST00000432129 | *EGFL8* |
| ENST00000428388 | ENST00000437001 | *PPT2* |
| ENST00000428388 | ENST00000333845 | *EGFL8* |
| ENST00000428388 | ENST00000424499 | *PPT2* |
| ENST00000428388 | ENST00000361568 | *PPT2* |
| ENST00000428388 | ENST00000414204 | *PPT2* |
| ENST00000428388 | ENST00000324816 | *PPT2* |
| ENST00000428388 | ENST00000375143 | *PPT2* |
| ENST00000428388 | ENST00000375137 | *PPT2* |
| ENST00000471486 | ENST00000355082 | *EIF3I* |
| ENST00000471486 | ENST00000373586 | *EIF3I* |
| ENST00000530762 | ENST00000534343 | *RRP8* |
| ENST00000530762 | ENST00000254605 | *RRP8* |
| ENST00000461734 | ENST00000308346 | *WDR52* |
| ENST00000461734 | ENST00000465636 | *WDR52* |
| ENST00000461734 | ENST00000393845 | *WDR52* |
| NONHSAT081901 | ENST00000486278 | *RUNX1* |
| NONHSAT081901 | ENST00000455571 | *RUNX1* |
| NONHSAT081901 | ENST00000300305 | *RUNX1* |
| NONHSAT081901 | ENST00000416754 | *RUNX1* |
| NONHSAT081901 | ENST00000437180 | *RUNX1* |
| NONHSAT081901 | ENST00000475045 | *RUNX1* |
| ENST00000495010 | ENST00000375663 | *VARS* |
| ENST00000495010 | ENST00000444930 | *VARS* |
| ENST00000511505 | ENST00000510191 | *LARS* |
| ENST00000511505 | ENST00000274562 | *LARS* |
| ENST00000511505 | ENST00000545646 | *LARS* |
| ENST00000511505 | ENST00000394434 | *LARS* |
| NR_104601 | ENST00000453868 | *PHF19* |
| NR_104601 | ENST00000373896 | *PHF19* |
| NR_104601 | ENST00000419155 | *PHF19* |
| NR_104601 | ENST00000439674 | *PHF19* |
| ENST00000486854 | ENST00000441000 | *HNRNPH3* |
| ENST00000486854 | ENST00000354695 | *HNRNPH3* |
| ENST00000486854 | ENST00000265866 | *HNRNPH3* |
| ENST00000456506 | ENST00000415597 | *LMCD1* |
| ENST00000456506 | ENST00000157600 | *LMCD1* |
| ENST00000456506 | ENST00000454244 | *LMCD1* |
| ENST00000456506 | ENST00000535732 | *LMCD1* |
| ENST00000456506 | ENST00000397386 | *LMCD1* |
| ENST00000456506 | ENST00000426878 | *LMCD1* |
| ENST00000381645 | ENST00000400206 | *CSNK1E* |
| ENST00000411650 | ENST00000283628 | *UBP1* |
| ENST00000411650 | ENST00000447368 | *UBP1* |
| ENST00000411650 | ENST00000283629 | *UBP1* |
| ENST00000512669 | ENST00000302787 | *LETM1* |
| ENST00000420095 | ENST00000415597 | *LMCD1* |
| ENST00000420095 | ENST00000157600 | *LMCD1* |
| ENST00000420095 | ENST00000454244 | *LMCD1* |
| ENST00000420095 | ENST00000535732 | *LMCD1* |
| ENST00000420095 | ENST00000397386 | *LMCD1* |
| ENST00000430730 | ENST00000304895 | *GUSB* |
| ENST00000430730 | ENST00000421103 | *GUSB* |
| ENST00000430730 | ENST00000345660 | *GUSB* |
| ENST00000539298 | ENST00000308736 | *DHX37* |
| ENST00000539298 | ENST00000543962 | *DHX37* |
| ENST00000539298 | ENST00000544745 | *DHX37* |
| ENST00000467971 | ENST00000411484 | *2-Sep* |
| ENST00000467971 | ENST00000445030 | *2-Sep* |
| ENST00000467971 | ENST00000428282 | *2-Sep* |
| ENST00000467971 | ENST00000434955 | *2-Sep* |
| ENST00000467971 | ENST00000401990 | *2-Sep* |
| ENST00000467971 | ENST00000402092 | *2-Sep* |
| ENST00000467971 | ENST00000436795 | *2-Sep* |
| ENST00000467971 | ENST00000360051 | *2-Sep* |
| ENST00000467971 | ENST00000437066 | *2-Sep* |
| ENST00000467971 | ENST00000391973 | *2-Sep* |
| ENST00000467971 | ENST00000428524 | *2-Sep* |
| ENST00000467971 | ENST00000407971 | *2-Sep* |
| ENST00000467971 | ENST00000407017 | *2-Sep* |
| ENST00000467971 | ENST00000457874 | *2-Sep* |
| ENST00000467971 | ENST00000449239 | *2-Sep* |
| ENST00000467971 | ENST00000443492 | *2-Sep* |
| ENST00000467971 | ENST00000391971 | *2-Sep* |
| ENST00000467971 | ENST00000421717 | *2-Sep* |
| ENST00000467971 | ENST00000441533 | *2-Sep* |
| ENST00000467971 | ENST00000429791 | *2-Sep* |
| ENST00000467971 | ENST00000420786 | *2-Sep* |
| ENST00000514801 | ENST00000513865 | *SNX14* |
| UCSC_TCONS_00011776 | ENST00000424675 | *HCG27* |
| UCSC_TCONS_00011776 | ENST00000383331 | *HCG27* |
| ENST00000508045 | ENST00000510984 | *LUC7L3* |
| ENST00000508045 | ENST00000505658 | *LUC7L3* |
| ENST00000508045 | ENST00000311571 | *LUC7L3* |
| ENST00000508045 | ENST00000393227 | *LUC7L3* |
| ENST00000508045 | ENST00000513025 | *LUC7L3* |
| ENST00000508045 | ENST00000544170 | *LUC7L3* |
| ENST00000508045 | ENST00000240304 | *LUC7L3* |
| ENST00000508045 | ENST00000505619 | *LUC7L3* |
| NONHSAG022315 | ENST00000578794 | *RP11-159D12.5* |
| ENST00000419510 | ENST00000438077 | *BCL6* |
| ENST00000419510 | ENST00000232014 | *BCL6* |
| ENST00000419510 | ENST00000450123 | *BCL6* |
| ENST00000419510 | ENST00000406870 | *BCL6* |
| ENST00000419510 | ENST00000430339 | *BCL6* |
| ENST00000496387 | ENST00000311672 | *UQCRH* |
| ENST00000515668 | ENST00000537241 | *PGM2* |
| ENST00000515668 | ENST00000544359 | *PGM2* |
| ENST00000515668 | ENST00000381967 | *PGM2* |
| ENST00000568470 | ENST00000561697 | *CES2* |
| ENST00000568470 | ENST00000317091 | *CES2* |
| ENST00000568470 | ENST00000417689 | *CES2* |
| ENST00000568470 | ENST00000564420 | *CES2* |
| ENST00000568470 | ENST00000566182 | *CES2* |
| ENST00000461597 | ENST00000481050 | *C1ORF85* |
| ENST00000461597 | ENST00000362007 | *C1ORF85* |
| NONHSAG046894 | ENST00000316731 | *CCZ1B* |
| NONHSAG046894 | ENST00000538180 | *CCZ1B* |
| NONHSAT097375 | ENST00000511976 | *FAM13A* |
| NONHSAT097375 | ENST00000264344 | *FAM13A* |
| NONHSAT097375 | ENST00000513837 | *FAM13A* |
| NONHSAT097375 | ENST00000508369 | *FAM13A* |
| NONHSAT097375 | ENST00000503556 | *FAM13A* |
| NONHSAT097375 | ENST00000395002 | *FAM13A* |
| ENST00000503501 | ENST00000541192 | *SENP6* |
| ENST00000503501 | ENST00000424947 | *SENP6* |
| ENST00000503501 | ENST00000327284 | *SENP6* |
| ENST00000503501 | ENST00000370014 | *SENP6* |
| ENST00000503501 | ENST00000447266 | *SENP6* |
| ENST00000503501 | ENST00000370010 | *SENP6* |
| ENST00000573774 | ENST00000576362 | *TMEM256-PLSCR3* |
| ENST00000573774 | ENST00000573213 | *TMEM256-PLSCR3* |
| ENST00000573774 | ENST00000576201 | *TMEM256-PLSCR3* |
| ENST00000573774 | ENST00000571802 | *TMEM256-PLSCR3* |
| ENST00000573774 | ENST00000535512 | *TMEM256-PLSCR3* |
| ENST00000573774 | ENST00000575434 | *TMEM256-PLSCR3* |
| ENST00000573774 | ENST00000571078 | *TMEM256-PLSCR3* |
| ENST00000573774 | ENST00000324822 | *TMEM256-PLSCR3* |
| ENST00000573774 | ENST00000574401 | *TMEM256-PLSCR3* |
| ENST00000471603 | ENST00000262304 | *PKD1* |
| ENST00000471603 | ENST00000423118 | *PKD1* |
| ENST00000471603 | ENST00000567946 | *PKD1* |
| ENST00000561962 | ENST00000342085 | *PDPK1* |
| ENST00000561962 | ENST00000268673 | *PDPK1* |
| ENST00000540555 | ENST00000357193 | *TSG101* |
| ENST00000540555 | ENST00000536719 | *TSG101* |
| ENST00000540555 | ENST00000251968 | *TSG101* |
| NONHSAT096929 | ENST00000507556 | *THAP6* |
| NONHSAT096929 | ENST00000507557 | *THAP6* |
| NONHSAT096929 | ENST00000504190 | *THAP6* |
| NONHSAT096929 | ENST00000502620 | *THAP6* |
| NONHSAT096929 | ENST00000507885 | *THAP6* |
| ENST00000590278 | ENST00000592484 | *LRP3* |
| ENST00000590278 | ENST00000253193 | *LRP3* |
| ENST00000491629 | ENST00000368021 | *USF1* |
| ENST00000491629 | ENST00000368019 | *USF1* |
| ENST00000491629 | ENST00000534633 | *USF1* |
| ENST00000491629 | ENST00000528768 | *USF1* |
| ENST00000491629 | ENST00000368020 | *USF1* |
| ENST00000491629 | ENST00000435396 | *USF1* |
| ENST00000491629 | ENST00000531842 | *USF1* |
| lnc-C10orf116-1:2 | ENST00000372013 | *ADIRF* |
| ENST00000494233 | ENST00000420410 | *LPP* |
| ENST00000494233 | ENST00000312675 | *LPP* |
| ENST00000494233 | ENST00000416784 | *LPP* |
| ENST00000494233 | ENST00000454789 | *LPP* |
| ENST00000494233 | ENST00000426274 | *LPP* |
| ENST00000494233 | ENST00000543006 | *LPP* |
| ENST00000494233 | ENST00000448637 | *LPP* |
| ENST00000494233 | ENST00000414139 | *LPP* |
| ENST00000494233 | ENST00000415906 | *LPP* |
| ENST00000475035 | ENST00000367208 | *SNRPE* |
| ENST00000475035 | ENST00000414487 | *SNRPE* |
| NONHSAT106538 | ENST00000380874 | *FOXC1* |
| ENST00000536502 | ENST00000413381 | *ARL6IP4* |
| ENST00000536502 | ENST00000439686 | *ARL6IP4* |
| ENST00000536502 | ENST00000456762 | *ARL6IP4* |
| ENST00000536502 | ENST00000315580 | *ARL6IP4* |
| ENST00000536502 | ENST00000357866 | *ARL6IP4* |
| ENST00000536502 | ENST00000542099 | *ARL6IP4* |
| ENST00000536502 | ENST00000412505 | *ARL6IP4* |
| ENST00000536502 | ENST00000543566 | *ARL6IP4* |
| ENST00000536502 | ENST00000453766 | *ARL6IP4* |
| ENST00000536502 | ENST00000392435 | *ARL6IP4* |
| ENST00000536502 | ENST00000426960 | *ARL6IP4* |
| ENST00000536502 | ENST00000454885 | *ARL6IP4* |
| ENST00000548047 | ENST00000394147 | *DGKA* |
| ENST00000548047 | ENST00000555218 | *DGKA* |
| ENST00000548047 | ENST00000551156 | *DGKA* |
| ENST00000548047 | ENST00000331886 | *DGKA* |
| ENST00000548047 | ENST00000549368 | *DGKA* |
| ENST00000548047 | ENST00000552903 | *DGKA* |
| ENST00000485027 | ENST00000482287 | *KPNA1* |
| ENST00000485027 | ENST00000465882 | *KPNA1* |
| ENST00000485027 | ENST00000344337 | *KPNA1* |
| ENST00000485027 | ENST00000476916 | *KPNA1* |
| ENST00000485027 | ENST00000493510 | *KPNA1* |
| ENST00000513167 | ENST00000274459 | *ATG12* |
| ENST00000513167 | ENST00000509910 | *ATG12* |
| ENST00000513167 | ENST00000500945 | *ATG12* |
| NONHSAT091571 | ENST00000488466 | *ITGB5* |
| NONHSAT091571 | ENST00000296181 | *ITGB5* |
| NONHSAT091571 | ENST00000481591 | *ITGB5* |
| ENST00000523461 | ENST00000524232 | *C14ORF159* |
| ENST00000523461 | ENST00000520328 | *C14ORF159* |
| ENST00000523461 | ENST00000525393 | *C14ORF159* |
| ENST00000523461 | ENST00000519019 | *C14ORF159* |
| ENST00000523461 | ENST00000412671 | *C14ORF159* |
| ENST00000523461 | ENST00000518665 | *C14ORF159* |
| ENST00000523461 | ENST00000256324 | *C14ORF159* |
| ENST00000523461 | ENST00000521081 | *C14ORF159* |
| ENST00000523461 | ENST00000518871 | *C14ORF159* |
| ENST00000523461 | ENST00000519950 | *C14ORF159* |
| ENST00000523461 | ENST00000517518 | *C14ORF159* |
| ENST00000523461 | ENST00000521077 | *C14ORF159* |
| ENST00000523461 | ENST00000522322 | *C14ORF159* |
| ENST00000523461 | ENST00000523771 | *C14ORF159* |
| ENST00000523461 | ENST00000517362 | *C14ORF159* |
| ENST00000523461 | ENST00000521334 | *C14ORF159* |
| ENST00000523461 | ENST00000518868 | *C14ORF159* |
| ENST00000523461 | ENST00000523879 | *C14ORF159* |
| ENST00000523461 | ENST00000517877 | *C14ORF159* |
| ENST00000523461 | ENST00000521064 | *C14ORF159* |
| ENST00000523461 | ENST00000522170 | *C14ORF159* |
| ENST00000523461 | ENST00000298858 | *C14ORF159* |
| ENST00000523461 | ENST00000523894 | *C14ORF159* |
| ENST00000523461 | ENST00000522837 | *C14ORF159* |
| ENST00000523461 | ENST00000523816 | *C14ORF159* |
| ENST00000523461 | ENST00000428926 | *C14ORF159* |
| ENST00000523461 | ENST00000522816 | *C14ORF159* |
| ENST00000557491 | ENST00000318308 | *ZC3H14* |
| ENST00000557491 | ENST00000555900 | *ZC3H14* |
| ENST00000557491 | ENST00000336693 | *ZC3H14* |
| ENST00000557491 | ENST00000393514 | *ZC3H14* |
| ENST00000557491 | ENST00000556945 | *ZC3H14* |
| ENST00000557491 | ENST00000251038 | *ZC3H14* |
| ENST00000557491 | ENST00000557607 | *ZC3H14* |
| ENST00000557491 | ENST00000302216 | *ZC3H14* |
| ENST00000557491 | ENST00000556000 | *ZC3H14* |
| ENST00000557491 | ENST00000555755 | *ZC3H14* |
| ENST00000557491 | ENST00000359301 | *ZC3H14* |
| ENST00000557491 | ENST00000555792 | *ZC3H14* |
| ENST00000557491 | ENST00000406216 | *ZC3H14* |
| NR_048537 | ENST00000541138 | *SLC9A8* |
| NR_048537 | ENST00000417961 | *SLC9A8* |
| NR_048537 | ENST00000361573 | *SLC9A8* |
| NR_048537 | ENST00000539601 | *SLC9A8* |
| ENST00000480913 | ENST00000437288 | *DDAH2* |
| ENST00000480913 | ENST00000416410 | *DDAH2* |
| ENST00000480913 | ENST00000375792 | *DDAH2* |
| ENST00000480913 | ENST00000375787 | *DDAH2* |
| ENST00000480913 | ENST00000436437 | *DDAH2* |
| ENST00000480913 | ENST00000375789 | *DDAH2* |
| ENST00000558604 | ENST00000561243 | *ACAN* |
| ENST00000558604 | ENST00000559004 | *ACAN* |
| ENST00000558604 | ENST00000352105 | *ACAN* |
| ENST00000558604 | ENST00000558704 | *ACAN* |
| ENST00000558604 | ENST00000439576 | *ACAN* |
| ENST00000491878 | ENST00000444574 | *STK24* |
| ENST00000491878 | ENST00000376547 | *STK24* |
| ENST00000491878 | ENST00000397517 | *STK24* |
| ENST00000491878 | ENST00000539966 | *STK24* |
| ENST00000558065 | ENST00000559983 | *SEMA4B* |
| ENST00000558065 | ENST00000559074 | *SEMA4B* |
| ENST00000558065 | ENST00000379122 | *SEMA4B* |
| ENST00000558065 | ENST00000558051 | *SEMA4B* |
| ENST00000558065 | ENST00000411539 | *SEMA4B* |
| ENST00000558065 | ENST00000561085 | *SEMA4B* |
| ENST00000558065 | ENST00000559247 | *SEMA4B* |
| ENST00000558065 | ENST00000332496 | *SEMA4B* |
| ENST00000552576 | ENST00000420846 | *CD63* |
| ENST00000552576 | ENST00000257857 | *CD63* |
| ENST00000552576 | ENST00000549117 | *CD63* |
| ENST00000552576 | ENST00000546457 | *CD63* |
| ENST00000448997 | ENST00000455834 | *HEMK1* |
| ENST00000448997 | ENST00000232854 | *HEMK1* |
| ENST00000448997 | ENST00000434410 | *HEMK1* |
| ENST00000448997 | ENST00000443894 | *HEMK1* |
| ENST00000339292 | ENST00000538629 | *SCAMP1* |
| ENST00000546433 | ENST00000326495 | *SSH1* |
| ENST00000546433 | ENST00000360239 | *SSH1* |
| ENST00000546433 | ENST00000551165 | *SSH1* |
| ENST00000546433 | ENST00000326470 | *SSH1* |
| ENST00000354204 | ENST00000431828 | *KANSL3* |
| ENST00000354204 | ENST00000435669 | *KANSL3* |
| ENST00000354204 | ENST00000448075 | *KANSL3* |
| ENST00000354204 | ENST00000599854 | *KANSL3* |
| ENST00000354204 | ENST00000441706 | *KANSL3* |
| ENST00000354204 | ENST00000440133 | *KANSL3* |
| ENST00000585163 | ENST00000578018 | *CDK5RAP3* |
| ENST00000585163 | ENST00000536708 | *CDK5RAP3* |
| ENST00000585163 | ENST00000338399 | *CDK5RAP3* |
| ENST00000585163 | ENST00000583352 | *CDK5RAP3* |
| ENST00000585163 | ENST00000579175 | *CDK5RAP3* |
| ENST00000585163 | ENST00000579632 | *CDK5RAP3* |
| ENST00000585163 | ENST00000583697 | *CDK5RAP3* |
| ENST00000433271 | ENST00000607045 | *TMEM248* |
| ENST00000433271 | ENST00000341567 | *TMEM248* |
| ENST00000433271 | ENST00000413593 | *TMEM248* |
| ENST00000433271 | ENST00000424964 | *TMEM248* |
| ENST00000433271 | ENST00000418375 | *TMEM248* |
| ENST00000454272 | ENST00000537107 | *ANKRD65* |
| ENST00000454272 | ENST00000442470 | *ANKRD65* |
| ENST00000454272 | ENST00000427211 | *ANKRD65* |
| ENST00000454272 | ENST00000520296 | *ANKRD65* |
| ENST00000514179 | ENST00000296859 | *RAPGEF6* |
| ENST00000514179 | ENST00000514667 | *CTC-432M15.3* |
| ENST00000514179 | ENST00000307984 | *RAPGEF6* |
| ENST00000514179 | ENST00000504039 | *RAPGEF6* |
| ENST00000514179 | ENST00000504575 | *RAPGEF6* |
| ENST00000514179 | ENST00000509018 | *RAPGEF6* |
| ENST00000514179 | ENST00000510071 | *RAPGEF6* |
| ENST00000514179 | ENST00000513227 | *RAPGEF6* |
| ENST00000514179 | ENST00000507093 | *RAPGEF6* |
| ENST00000514179 | ENST00000512052 | *RAPGEF6* |
| ENST00000514179 | ENST00000308008 | *RAPGEF6* |
| ENST00000461936 | ENST00000354955 | *FMOD* |
| ENST00000518596 | ENST00000597695 | *ZNF114* |
| ENST00000524780 | ENST00000531540 | *RNH1* |
| ENST00000524780 | ENST00000527485 | *RNH1* |
| ENST00000524780 | ENST00000438658 | *RNH1* |
| ENST00000524780 | ENST00000356187 | *RNH1* |
| ENST00000524780 | ENST00000529368 | *RNH1* |
| ENST00000524780 | ENST00000531149 | *RNH1* |
| ENST00000524780 | ENST00000354420 | *RNH1* |
| ENST00000524780 | ENST00000529306 | *RNH1* |
| ENST00000524780 | ENST00000397614 | *RNH1* |
| ENST00000524780 | ENST00000532055 | *RNH1* |
| ENST00000524780 | ENST00000397615 | *RNH1* |
| ENST00000524780 | ENST00000533410 | *RNH1* |
| ENST00000524780 | ENST00000534797 | *RNH1* |
| ENST00000524780 | ENST00000397604 | *RNH1* |
| ENST00000502799 | ENST00000511980 | *GAK* |
| ENST00000502799 | ENST00000314167 | *GAK* |
| ENST00000502799 | ENST00000511163 | *GAK* |
| ENST00000537285 | ENST00000313663 | *C2CD3* |
| ENST00000537285 | ENST00000334126 | *C2CD3* |
| ENST00000462039 | ENST00000521156 | *MTO1* |
| ENST00000462039 | ENST00000370300 | *MTO1* |
| ENST00000462039 | ENST00000498286 | *MTO1* |
| ENST00000462039 | ENST00000415954 | *MTO1* |
| ENST00000462039 | ENST00000370305 | *MTO1* |
| ENST00000527228 | ENST00000531154 | *ALG9* |
| ENST00000527228 | ENST00000398006 | *ALG9* |
| ENST00000527228 | ENST00000532425 | *ALG9* |
| ENST00000519622 | ENST00000523555 | *PABPC1* |
| ENST00000519622 | ENST00000519100 | *PABPC1* |
| ENST00000519622 | ENST00000519004 | *PABPC1* |
| ENST00000519622 | ENST00000522387 | *PABPC1* |
| ENST00000519622 | ENST00000517403 | *PABPC1* |
| ENST00000519622 | ENST00000318607 | *PABPC1* |
| ENST00000487412 | ENST00000255486 | *STARD13* |
| ENST00000487412 | ENST00000399365 | *STARD13* |
| ENST00000487412 | ENST00000336934 | *STARD13* |
| ENST00000487412 | ENST00000567873 | *STARD13* |
| NONHSAT147931 | ENST00000336577 | *MMP25* |
| NR_028308 | ENST00000444339 | *RBKS* |
| NR_028308 | ENST00000302188 | *RBKS* |
| ENST00000519666 | ENST00000239231 | *PANK3* |
| ENST00000499653 | ENST00000520539 | *UBR5* |
| ENST00000460980 | ENST00000297532 | *FASTK* |
| ENST00000460980 | ENST00000482571 | *FASTK* |
| ENST00000460980 | ENST00000540185 | *FASTK* |
| ENST00000460980 | ENST00000353841 | *FASTK* |
| ENST00000497062 | ENST00000317304 | *EYA2* |
| ENST00000497062 | ENST00000458636 | *EYA2* |
| ENST00000497062 | ENST00000327619 | *EYA2* |
| ENST00000497062 | ENST00000357410 | *EYA2* |
| ENST00000549412 | ENST00000550643 | *SPATS2* |
| ENST00000549412 | ENST00000552918 | *SPATS2* |
| ENST00000549412 | ENST00000550997 | *SPATS2* |
| ENST00000549412 | ENST00000321898 | *SPATS2* |
| ENST00000549412 | ENST00000553127 | *SPATS2* |
| ENST00000549412 | ENST00000552171 | *SPATS2* |
| ENST00000549412 | ENST00000548377 | *SPATS2* |
| ENST00000549412 | ENST00000551540 | *SPATS2* |
| ENST00000549412 | ENST00000549298 | *SPATS2* |
| ENST00000549412 | ENST00000548710 | *SPATS2* |
| ENST00000549412 | ENST00000549538 | *SPATS2* |
| ENST00000549412 | ENST00000548777 | *SPATS2* |
| ENST00000549412 | ENST00000547865 | *SPATS2* |
| ENST00000549412 | ENST00000549179 | *SPATS2* |
| ENST00000549412 | ENST00000548654 | *SPATS2* |
| ENST00000558836 | ENST00000549414 | *CUX1* |
| ENST00000558836 | ENST00000292538 | *CUX1* |
| ENST00000558836 | ENST00000425244 | *CUX1* |
| ENST00000558836 | ENST00000393824 | *CUX1* |
| ENST00000558836 | ENST00000437600 | *CUX1* |
| ENST00000558836 | ENST00000487284 | *CUX1* |
| ENST00000558836 | ENST00000547394 | *CUX1* |
| ENST00000558836 | ENST00000360264 | *CUX1* |
| ENST00000558836 | ENST00000550008 | *CUX1* |
| ENST00000558836 | ENST00000546411 | *CUX1* |
| ENST00000558836 | ENST00000292535 | *CUX1* |
| ENST00000558836 | ENST00000556210 | *CUX1* |
| ENST00000486897 | ENST00000373416 | *PHC2* |
| ENST00000486897 | ENST00000373418 | *PHC2* |
| ENST00000486897 | ENST00000419414 | *PHC2* |
| ENST00000486897 | ENST00000373422 | *PHC2* |
| ENST00000486897 | ENST00000431992 | *PHC2* |
| ENST00000486897 | ENST00000257118 | *PHC2* |
| ENST00000510105 | ENST00000359052 | *SMARCAD1* |
| ENST00000510105 | ENST00000354268 | *SMARCAD1* |
| ENST00000510105 | ENST00000509418 | *SMARCAD1* |
| ENST00000510105 | ENST00000457823 | *SMARCAD1* |
| NONHSAG010150 | ENST00000544559 | *WNK1* |
| NONHSAG010150 | ENST00000530271 | *WNK1* |
| NONHSAG010150 | ENST00000537687 | *WNK1* |
| NONHSAG010150 | ENST00000315939 | *WNK1* |
| NONHSAG010150 | ENST00000340908 | *WNK1* |
| NONHSAG010150 | ENST00000543065 | *WNK1* |
| NONHSAG010150 | ENST00000535572 | *WNK1* |
| lnc-TSN-2:6 | ENST00000397587 | *CLASP1* |
| lnc-TSN-2:6 | ENST00000541377 | *CLASP1* |
| lnc-TSN-2:6 | ENST00000455322 | *CLASP1* |
| lnc-TSN-2:6 | ENST00000409078 | *CLASP1* |
| lnc-TSN-2:6 | ENST00000263710 | *CLASP1* |
| ENST00000589138 | ENST00000587508 | *CC2D1A* |
| ENST00000589138 | ENST00000318003 | *CC2D1A* |
| ENST00000589138 | ENST00000589606 | *CC2D1A* |
| ENST00000526091 | ENST00000278550 | *TENM4* |
| ENST00000526091 | ENST00000527736 | *TENM4* |
| ENST00000491182 | ENST00000474754 | *TM4SF18* |
| ENST00000491182 | ENST00000296059 | *TM4SF18* |
| ENST00000491182 | ENST00000470080 | *TM4SF18* |
| ENST00000491103 | ENST00000475942 | *TMEM14B* |
| ENST00000491103 | ENST00000379530 | *TMEM14B* |
| ENST00000491103 | ENST00000481240 | *TMEM14B* |
| ENST00000491103 | ENST00000461342 | *TMEM14B* |
| ENST00000491103 | ENST00000543878 | *SYCP2L* |
| ENST00000491103 | ENST00000379542 | *TMEM14B* |
| ENST00000491103 | ENST00000467317 | *TMEM14B* |
| ENST00000491103 | ENST00000473276 | *TMEM14B* |
| ENST00000588533 | ENST00000590909 | *MARK4* |
| ENST00000588533 | ENST00000300843 | *MARK4* |
| ENST00000588533 | ENST00000262891 | *MARK4* |
| ENST00000588533 | ENST00000587566 | *MARK4* |
| ENST00000473321 | ENST00000367993 | *NDUFS2* |
| ENST00000473321 | ENST00000392179 | *NDUFS2* |
| ENST00000473321 | ENST00000476409 | *NDUFS2* |
| ENST00000496289 | ENST00000544130 | *ZC3H15* |
| ENST00000496289 | ENST00000337859 | *ZC3H15* |
| NONHSAG034242 | ENST00000413817 | *DENND6B* |
| ENST00000504426 | ENST00000438313 | *LEF1* |
| ENST00000504426 | ENST00000379951 | *LEF1* |
| ENST00000504426 | ENST00000265165 | *LEF1* |
| ENST00000504426 | ENST00000510624 | *LEF1* |
| NONHSAT147928 | ENST00000336577 | *MMP25* |
| ENST00000567120 | ENST00000562824 | *JMJD8* |
| ENST00000567120 | ENST00000293882 | *JMJD8* |
| ENST00000567120 | ENST00000412368 | *JMJD8* |
| ENST00000567120 | ENST00000562111 | *JMJD8* |
| ENST00000567120 | ENST00000454700 | *JMJD8* |
| ENST00000567120 | ENST00000609261 | *JMJD8* |
| ENST00000394613 | ENST00000323646 | *PLA2G16* |
| ENST00000394613 | ENST00000540943 | *PLA2G16* |
| ENST00000394613 | ENST00000415826 | *PLA2G16* |
| NONHSAT098258 | ENST00000512483 | *PGRMC2* |
| NONHSAT098258 | ENST00000296425 | *PGRMC2* |
| NONHSAT098258 | ENST00000503872 | *PGRMC2* |
| NONHSAT098258 | ENST00000394276 | *PGRMC2* |
| NONHSAT098258 | ENST00000520121 | *PGRMC2* |
| NONHSAT098258 | ENST00000503588 | *PGRMC2* |
| ENST00000468377 | ENST00000487848 | *GATA2* |
| ENST00000450006 | ENST00000289921 | *FAM160B2* |
| ENST00000489458 | ENST00000413996 | *SGK1* |
| ENST00000489458 | ENST00000528577 | *SGK1* |
| ENST00000489458 | ENST00000367858 | *SGK1* |
| ENST00000489458 | ENST00000237305 | *SGK1* |
| ENST00000489458 | ENST00000367857 | *SGK1* |
| ENST00000489458 | ENST00000475719 | *SGK1* |
| ENST00000489458 | ENST00000461976 | *SGK1* |
| ENST00000497738 | ENST00000395780 | *MAPK12* |
| ENST00000497738 | ENST00000215659 | *MAPK12* |
| ENST00000453680 | ENST00000437458 | *GORASP1* |
| ENST00000453680 | ENST00000422110 | *GORASP1* |
| ENST00000453680 | ENST00000479927 | *GORASP1* |
| ENST00000453680 | ENST00000416741 | *GORASP1* |
| ENST00000453680 | ENST00000411813 | *GORASP1* |
| ENST00000453680 | ENST00000319283 | *GORASP1* |
| ENST00000453680 | ENST00000427459 | *GORASP1* |
| ENST00000453680 | ENST00000441081 | *GORASP1* |
| NONHSAG014490 | ENST00000557008 | *BCL2L2-PABPN1* |
| NONHSAG014490 | ENST00000554635 | *BCL2L2* |
| NONHSAG014490 | ENST00000556100 | *BCL2L2-PABPN1* |
| NONHSAG014490 | ENST00000556821 | *PABPN1* |
| NONHSAG014490 | ENST00000557579 | *BCL2L2* |
| NONHSAG014490 | ENST00000250405 | *BCL2L2* |
| NONHSAG014490 | ENST00000556599 | *BCL2L2* |
| NONHSAG014490 | ENST00000553824 | *BCL2L2* |
| NONHSAG014490 | ENST00000557236 | *BCL2L2* |
| NONHSAG014490 | ENST00000216727 | *PABPN1* |
| NONHSAG014490 | ENST00000555295 | *PABPN1* |
| NONHSAG014490 | ENST00000553781 | *BCL2L2-PABPN1* |
| NONHSAG014490 | ENST00000397276 | *PABPN1* |
| ENST00000487296 | ENST00000414474 | *PSMB9* |
| ENST00000487296 | ENST00000395330 | *PSMB9* |
