# Supplementary material for: Genome-Wide Identification of Long Noncoding RNAs in Human Intervertebral Disc Degeneration by RNA Sequencing
Source: Hindawi journal article supplement (doi:10.1155/2016/3684875), 2016-01-01
Supplement: f8 [file 3684875.f8.docx]

| **GO ID** | **GO NAME** | **GO Category** | **Symbols within list** | **Enrichment Score** | **p-value** |
| --- | --- | --- | --- | --- | --- |
| GO:0005622 | intracellular | cellular_component | FZD6,MARVELD1,CDK14,USP10,RNASEH2B,SLC25A37,CRBN,OBFC1,RAB3GAP2,PLEKHA3,PBX2,LPP,DHX34,KANK2,CRIP2,ACADVL,EIF2B4,GTF3C2,CADM1,RAI1,PSMB10,XRN1,CKB,CLMN,IGF1R,AVL9,LAMB1,NPHP3,PTS,TNRC6A,MYO1D,SIRT2,EPHX2,UTRN,RALGAPA2,MYNN,TRNAU1AP,RAI14,NOC2L,PPIL2,TARS,RAF1,NLRP1,ZNF131,SEPT5,TSTD1,LEPRE1,SLC16A3,PPP1R13B,GAS8,COL9A1,RSC1A1,SFSWAP,CDK13,RBM6,BDNF,TAZ,SIN3B,SPOP,CPE,CBX5,PLCD1,SART1,COL2A1,LRRC1,CCDC91,RAB34,SUPT5H,SUPT20H,RILPL1,HLA-DPB1,ST3GAL1,MARCH5,UBXN1,DPP4,PWP1,FBXO32,LUC7L,BCL6,FUBP1,ZNF783,CMPK2,TBX2,ENOSF1,PTPN22,MMS19,GBP3,SHMT2,ZFP91,CNTF,EEF2K,PLD1,VAPB,NLN,GPAA1,CUX1,PGS1,RBM17,CLNS1A,NUP98,EED,SLC9B2,AMT,FMR1,SMPD4,SMAD7,MCF2L,USP4,PPFIBP2,HDAC6,GLG1,ARHGEF12,EHMT1,ATP6V1D,VRK2,DYNC1I1,RNH1,ZNF496,HGS,CASP4,DERL2,IL15RA,NARS,LANCL2,H6PD,SYTL4,DGKA,TTLL3,ARPC4-TTLL3,PRMT10,PNKP,LEF1,GLS,PAX8,HLA-C,SUPT4H1,ZNF83,PSMB9,EMX2,ARHGEF25,YIPF1,ADAMTS1,RGL4,BCL2L13,BCL2L11,RBPMS,XYLT1,GLOD4,STARD13,ZSCAN31,STARD9,XBP1,COG4,CPM,FDPS,NISCH,PAM,ABCC1,NOM1,CEP135,GLT8D1,SNRNP70,HSD17B12,DDX23,HLA-DQA1,RAD23A,AP3S2,METTL3,APITD1,MPDU1,MARK4,UHMK1,USP47,ADAM8,MAP7D1,NOL3,POLR3E,CAPZB,GABPB1,PRPF40A,DNAJC10,RNF220,RAB35,XAF1,CD9,CDC37L1,PCGF6,RANBP1,SIPA1L1,MARCH6,DDX39A,KRIT1,KPNA6,SKIV2L,MINK1,PDLIM5,RNF24,RHOF,PTPN6,SUGP1,EEF1A1,ACTR3,LHX4,VASP,CMIP,CSNK2A1,IGBP1,UPF3A,NOD1,PRKACA,STAT2,ANAPC4,RPP14,DHX9,PIGS,PLK1,SDCCAG8,ZNF446,PNPO,VPS52,LMAN2,PDE7B,PREPL,ASNS,TBC1D2B,COL16A1,ECHDC1,NUTF2,TTC19,DNM1L,TXNL1,PTGES2,UPF1,ZNF621,HDGF,FDXR,RC3H1,PPP5C,PIGG,PDXK,NPC1,SHISA5,CCNL1,RHOBTB1,HERC2,CHD6,ZC3H12A,NUP210,TBC1D10B,SEPT4,MIB2,POLM,SLC11A2,DIP2A,SYMPK,EFTUD2,AAMP,RAB24,ATG4B,CNP,CLN8,TBX18,PIGN,GCDH,LBX2,PCGF1,VAMP7,DR1,BCLAF1,CAMK2D,FYTTD1,ZNF721,HLA-DMB,ZNF397,JHDM1D,SLC16A1,ZNF710,PLCB4,BBS1,DNPEP,TBC1D14,GALK2,PRPF3,TNK2,ENGASE,COL14A1,USP20,GIT2,FLG,DCAF11,WAC,STK11IP,STK4,ZNF142,FUBP3,TRO,MTG1,CCDC14,RARS,ZNF540,SIKE1,ALDH18A1,TPCN2,COPS7B,VTI1A,FGFR1,HPS4,RAB18,HSF4,PAIP1,CAPRIN1,GTF3C1,MMP16,NADSYN1,PMS1,ADCY4,CELF1,SNCAIP,PDE4D,AFAP1,RNASET2,SF3A2,TIMM23,PAF1,TAB2,SGK1,PLEKHG4,SHARPIN,DPF2,TCHP,CPT1B,CHKB,NADK,IDI1,RNF8,CDYL2,RUSC2,KIAA0586,CYP2R1,SEC31A,MDM2,KCMF1,RHBDD1,SNAP23,COL12A1,FKBP1A,ZFYVE26,PRKCH,DAZAP1,ANAPC16,PPM1F,ZNF595,TBP,DIS3L,IDH3G,YY1,FAM13A,TLN2,INO80,GPAT2,GMEB2,SSH2,THBS3,MCFD2,PFDN5,TTC1,CREB1,TRAF3IP1,SRP9,RALGPS2,FLII,TNFRSF25,PLEKHG5,QSOX1,RPRD1A,CCNDBP1,DDX58,ALDH6A1,RPL27,LCP2,CCNL2,PTPRK,SNX13,DFNA5,AP4B1,RHBDF1,SERPINH1,MAGI1,SNX21,NF1,ZEB1,PIH1D1,ACAA1,NEK3,EIF4B,CRIP1,SERBP1,SETBP1,SPATS2,NUB1,IFITM3,EMC3,ATG12,NUMA1,TPM4,RGMB,COL18A1,RTKN,EBF1,RPL9,MED28,PHF15,FKBP10,UNKL,ZNF3,RPS6KA5,G3BP1,NIPBL,RAB31,ALKBH3,ADSL,ALG6,ST3GAL4,CAPN10,DCAF8,GCNT2,ZNF837,PKD2,CASP2,STRN4,HNRNPA3,RXRB,GALT,UBAC1,LMNA,NUDT6,RSL1D1,MITF,NOL8,PPP2R3C,RB1,GOLGA8B,GOLGA8A,PRMT5,HMGXB3,MAPK8IP3,GNAI1,USP3,PLEKHA2,STX16,DHRS1,MZF1,ZFPM2,TP53BP1,BLOC1S5,TXNDC5,NEXN,RNF168,PAFAH1B1,ZNF865,LYRM2,SENP2,ISYNA1,EDEM2,GPCPD1,IL18,RPS19BP1,PUM2,MTCH1,SLFN11,CALCOCO2,STARD3,TPP1,SYTL2,DNALI1,SUB1,PWP2,CHMP1A,PDE8A,NSA2,AACS,ARPC2,SYNE1,STK38L,EPN2,DDX6,ZNF558,ANXA5,GALNT2,ADAM15,SH3BP5,MUM1,USP33,ZNF263,ZNF180,BICD1,NTMT1,ZNF276,RGS3,GCC2,NR1H3 | 1.174927242 | 1.66E-31 |
| GO:0044424 | intracellular part | cellular_component | FZD6,MARVELD1,CDK14,USP10,RNASEH2B,SLC25A37,CRBN,OBFC1,RAB3GAP2,PLEKHA3,PBX2,LPP,KANK2,CRIP2,ACADVL,EIF2B4,GTF3C2,CADM1,RAI1,PSMB10,XRN1,CKB,CLMN,IGF1R,AVL9,LAMB1,NPHP3,PTS,TNRC6A,MYO1D,SIRT2,EPHX2,UTRN,RALGAPA2,MYNN,TRNAU1AP,RAI14,NOC2L,PPIL2,TARS,RAF1,NLRP1,ZNF131,SEPT5,TSTD1,LEPRE1,SLC16A3,PPP1R13B,GAS8,COL9A1,RSC1A1,SFSWAP,CDK13,RBM6,BDNF,TAZ,SIN3B,SPOP,CPE,CBX5,PLCD1,SART1,COL2A1,LRRC1,CCDC91,RAB34,SUPT5H,SUPT20H,RILPL1,HLA-DPB1,ST3GAL1,MARCH5,UBXN1,DPP4,PWP1,FBXO32,LUC7L,BCL6,FUBP1,ZNF783,CMPK2,TBX2,ENOSF1,PTPN22,MMS19,GBP3,SHMT2,ZFP91,CNTF,EEF2K,PLD1,VAPB,NLN,GPAA1,CUX1,PGS1,RBM17,CLNS1A,NUP98,EED,SLC9B2,AMT,FMR1,SMPD4,SMAD7,MCF2L,USP4,HDAC6,GLG1,ARHGEF12,EHMT1,ATP6V1D,VRK2,DYNC1I1,RNH1,ZNF496,HGS,DERL2,IL15RA,NARS,LANCL2,H6PD,SYTL4,DGKA,TTLL3,ARPC4-TTLL3,PRMT10,PNKP,LEF1,GLS,PAX8,HLA-C,SUPT4H1,ZNF83,PSMB9,EMX2,ARHGEF25,YIPF1,ADAMTS1,RGL4,BCL2L13,BCL2L11,RBPMS,XYLT1,GLOD4,STARD13,ZSCAN31,STARD9,XBP1,COG4,CPM,FDPS,NISCH,PAM,ABCC1,NOM1,CEP135,GLT8D1,SNRNP70,HSD17B12,DDX23,HLA-DQA1,RAD23A,AP3S2,METTL3,APITD1,MPDU1,MARK4,UHMK1,USP47,ADAM8,MAP7D1,NOL3,POLR3E,CAPZB,GABPB1,PRPF40A,DNAJC10,RNF220,RAB35,XAF1,CD9,CDC37L1,PCGF6,RANBP1,SIPA1L1,MARCH6,DDX39A,KRIT1,KPNA6,SKIV2L,MINK1,PDLIM5,RNF24,RHOF,PTPN6,SUGP1,EEF1A1,ACTR3,LHX4,VASP,CMIP,CSNK2A1,IGBP1,UPF3A,NOD1,PRKACA,STAT2,ANAPC4,RPP14,DHX9,PIGS,PLK1,SDCCAG8,ZNF446,PNPO,VPS52,LMAN2,PDE7B,PREPL,ASNS,COL16A1,ECHDC1,NUTF2,TTC19,DNM1L,TXNL1,PTGES2,UPF1,ZNF621,HDGF,FDXR,RC3H1,PPP5C,PIGG,PDXK,NPC1,SHISA5,CCNL1,RHOBTB1,HERC2,CHD6,ZC3H12A,NUP210,TBC1D10B,SEPT4,MIB2,POLM,SLC11A2,DIP2A,SYMPK,EFTUD2,AAMP,RAB24,ATG4B,CNP,CLN8,TBX18,PIGN,GCDH,LBX2,PCGF1,VAMP7,DR1,BCLAF1,CAMK2D,FYTTD1,ZNF721,HLA-DMB,ZNF397,JHDM1D,SLC16A1,ZNF710,PLCB4,BBS1,DNPEP,TBC1D14,GALK2,PRPF3,TNK2,ENGASE,COL14A1,USP20,GIT2,FLG,DCAF11,WAC,STK11IP,STK4,ZNF142,FUBP3,TRO,MTG1,CCDC14,RARS,ZNF540,SIKE1,ALDH18A1,TPCN2,COPS7B,VTI1A,FGFR1,HPS4,HSF4,PAIP1,CAPRIN1,GTF3C1,MMP16,NADSYN1,PMS1,ADCY4,CELF1,SNCAIP,PDE4D,AFAP1,RNASET2,SF3A2,TIMM23,PAF1,TAB2,SGK1,SHARPIN,DPF2,TCHP,CPT1B,CHKB,NADK,IDI1,RNF8,CDYL2,RUSC2,KIAA0586,CYP2R1,SEC31A,MDM2,RHBDD1,SNAP23,COL12A1,FKBP1A,ZFYVE26,PRKCH,DAZAP1,ANAPC16,PPM1F,ZNF595,TBP,DIS3L,IDH3G,YY1,FAM13A,TLN2,INO80,GPAT2,GMEB2,SSH2,THBS3,MCFD2,PFDN5,TTC1,CREB1,TRAF3IP1,SRP9,RALGPS2,FLII,TNFRSF25,PLEKHG5,QSOX1,RPRD1A,CCNDBP1,DDX58,ALDH6A1,RPL27,LCP2,CCNL2,PTPRK,SNX13,DFNA5,AP4B1,RHBDF1,SERPINH1,MAGI1,SNX21,NF1,ZEB1,PIH1D1,ACAA1,NEK3,EIF4B,CRIP1,SERBP1,SETBP1,SPATS2,NUB1,IFITM3,EMC3,ATG12,NUMA1,TPM4,RGMB,COL18A1,EBF1,RPL9,MED28,PHF15,FKBP10,UNKL,ZNF3,RPS6KA5,G3BP1,NIPBL,RAB31,ALKBH3,ADSL,ALG6,ST3GAL4,CAPN10,DCAF8,GCNT2,ZNF837,PKD2,CASP2,STRN4,HNRNPA3,RXRB,GALT,UBAC1,LMNA,NUDT6,RSL1D1,MITF,NOL8,PPP2R3C,RB1,GOLGA8B,GOLGA8A,PRMT5,HMGXB3,MAPK8IP3,GNAI1,USP3,PLEKHA2,STX16,DHRS1,MZF1,ZFPM2,TP53BP1,BLOC1S5,TXNDC5,NEXN,RNF168,PAFAH1B1,ZNF865,LYRM2,SENP2,ISYNA1,EDEM2,GPCPD1,IL18,RPS19BP1,PUM2,MTCH1,SLFN11,CALCOCO2,STARD3,TPP1,SYTL2,DNALI1,SUB1,PWP2,CHMP1A,PDE8A,NSA2,AACS,ARPC2,SYNE1,STK38L,EPN2,DDX6,ZNF558,ANXA5,GALNT2,ADAM15,SH3BP5,MUM1,USP33,ZNF263,ZNF180,BICD1,NTMT1,ZNF276,RGS3,GCC2,NR1H3,GARS,CYTH2,CCDC115,GRB10,MRPS7,PLK2,PAN2,HEXA | 1.179174722 | 2.85E-30 |
| GO:0005737 | cytoplasm | cellular_component | FZD6,MARVELD1,CDK14,USP10,SLC25A37,CRBN,RAB3GAP2,PLEKHA3,LPP,KANK2,CRIP2,ACADVL,EIF2B4,CADM1,RAI1,PSMB10,XRN1,CKB,CLMN,AVL9,LAMB1,PTS,TNRC6A,MYO1D,SIRT2,EPHX2,UTRN,RALGAPA2,TRNAU1AP,RAI14,PPIL2,TARS,RAF1,NLRP1,SEPT5,TSTD1,LEPRE1,PPP1R13B,GAS8,COL9A1,RSC1A1,BDNF,TAZ,SIN3B,CPE,CBX5,PLCD1,SART1,COL2A1,LRRC1,CCDC91,RAB34,RILPL1,HLA-DPB1,ST3GAL1,MARCH5,UBXN1,DPP4,FBXO32,CMPK2,ENOSF1,PTPN22,MMS19,GBP3,SHMT2,CNTF,EEF2K,PLD1,VAPB,NLN,GPAA1,CUX1,PGS1,CLNS1A,NUP98,SLC9B2,AMT,FMR1,SMPD4,SMAD7,MCF2L,USP4,HDAC6,GLG1,ARHGEF12,ATP6V1D,VRK2,DYNC1I1,RNH1,HGS,DERL2,IL15RA,NARS,LANCL2,H6PD,SYTL4,DGKA,TTLL3,PRMT10,LEF1,GLS,HLA-C,PSMB9,ARHGEF25,YIPF1,ADAMTS1,RGL4,BCL2L13,BCL2L11,RBPMS,XYLT1,GLOD4,STARD13,STARD9,COG4,CPM,FDPS,NISCH,PAM,ABCC1,CEP135,GLT8D1,HSD17B12,DDX23,HLA-DQA1,AP3S2,APITD1,MPDU1,UHMK1,USP47,ADAM8,MAP7D1,NOL3,CAPZB,DNAJC10,RNF220,RAB35,XAF1,CD9,CDC37L1,RANBP1,SIPA1L1,MARCH6,DDX39A,KRIT1,KPNA6,SKIV2L,MINK1,PDLIM5,RNF24,RHOF,PTPN6,EEF1A1,ACTR3,VASP,CMIP,CSNK2A1,IGBP1,UPF3A,NOD1,PRKACA,STAT2,ANAPC4,RPP14,DHX9,PIGS,PLK1,SDCCAG8,PNPO,VPS52,LMAN2,PDE7B,PREPL,ASNS,COL16A1,ECHDC1,NUTF2,TTC19,DNM1L,TXNL1,PTGES2,UPF1,HDGF,FDXR,RC3H1,PPP5C,PIGG,PDXK,NPC1,SHISA5,RHOBTB1,HERC2,ZC3H12A,NUP210,TBC1D10B,SEPT4,MIB2,SLC11A2,SYMPK,EFTUD2,AAMP,RAB24,ATG4B,CNP,CLN8,PIGN,GCDH,VAMP7,BCLAF1,CAMK2D,HLA-DMB,ZNF397,SLC16A1,PLCB4,BBS1,DNPEP,TBC1D14,GALK2,PRPF3,TNK2,ENGASE,COL14A1,USP20,FLG,STK11IP,STK4,FUBP3,TRO,MTG1,RARS,ZNF540,SIKE1,ALDH18A1,TPCN2,COPS7B,VTI1A,FGFR1,HPS4,PAIP1,CAPRIN1,MMP16,NADSYN1,ADCY4,CELF1,SNCAIP,PDE4D,AFAP1,RNASET2,TIMM23,PAF1,TAB2,SGK1,SHARPIN,DPF2,TCHP,CPT1B,CHKB,NADK,IDI1,RUSC2,KIAA0586,CYP2R1,SEC31A,MDM2,RHBDD1,SNAP23,COL12A1,FKBP1A,ZFYVE26,PRKCH,DAZAP1,ANAPC16,PPM1F,TBP,DIS3L,IDH3G,FAM13A,TLN2,GPAT2,GMEB2,SSH2,THBS3,MCFD2,PFDN5,TTC1,TRAF3IP1,SRP9,RALGPS2,FLII,TNFRSF25,PLEKHG5,QSOX1,CCNDBP1,DDX58,ALDH6A1,RPL27,LCP2,SNX13,DFNA5,AP4B1,RHBDF1,SERPINH1,MAGI1,SNX21,NF1,ZEB1,ACAA1,NEK3,EIF4B,CRIP1,SERBP1,SPATS2,IFITM3,EMC3,ATG12,NUMA1,TPM4,RGMB,COL18A1,RPL9,MED28,FKBP10,UNKL,RPS6KA5,G3BP1,RAB31,ALKBH3,ADSL,ALG6,ST3GAL4,CAPN10,DCAF8,GCNT2,PKD2,CASP2,STRN4,GALT,UBAC1,LMNA,NUDT6,RSL1D1,NOL8,PPP2R3C,GOLGA8B,GOLGA8A,PRMT5,MAPK8IP3,GNAI1,PLEKHA2,STX16,DHRS1,ZFPM2,TP53BP1,BLOC1S5,TXNDC5,NEXN,PAFAH1B1,LYRM2,SENP2,ISYNA1,EDEM2,GPCPD1,IL18,RPS19BP1,PUM2,MTCH1,CALCOCO2,STARD3,TPP1,SYTL2,DNALI1,PWP2,CHMP1A,PDE8A,AACS,ARPC2,SYNE1,STK38L,EPN2,DDX6,ANXA5,GALNT2,ADAM15,SH3BP5,USP33,ZNF263,BICD1,NTMT1,RGS3,GCC2,GARS,CYTH2,CCDC115,GRB10,MRPS7,PLK2,PAN2,HEXA,USP7,PLD6,FLCN,NRP1,PTGR2,FAM172A,FMO2,GMDS,RPL24,IGFBP6,DAAM1,ARHGAP9,UST,MTMR14,RPL37A,MAST2,STX2,PTEN,FYN,ALDH1A3,IDH1,SRPK1,RUNX2,IQGAP1,FBXW7,CEP112,PHPT1,PTP4A2,LGMN,SMARCD3,HERPUD1,IKBKB,CTNS,RQCD1,SNX17,GGNBP2,PXN,KPNB1,SRGAP2,NCOR1,ATP11B,MEF2A,DYM,OXCT1,PARN,TNS1,FECH,ERAL1,COX7A2L,SMEK1,WASH4P,ITGB5,TMEM189,TCTN1,NECAB3,FIBP,SSBP1,CLSTN2,CACNB1,MAPK8,CLTCL1,MYLK,USP15,DDX41,MAN1A2,OSBPL3,HLA-F,RNF213,ABCA2,RAB8A,ZFAND2B,AFF4,SLC35D2,DENND4C,DMTF1,MAP4K4,CSK,CDK5RAP2,COL9A3,ITPA,OAZ1,PSMC6,TMEM66,SWAP70,STX18,TBCD,IMPDH1,RNF146,EMC4,DSN1,CDK6,NSFL1C,AGBL5,WDR61,NUP37,DDHD2,COX14,APPL2,FARSA,ZNF148,CLTB,FLOT1,WDR13 | 1.242668347 | 1.34E-22 |
| GO:0043226 | organelle | cellular_component | MARVELD1,CDK14,USP10,RNASEH2B,SLC25A37,CRBN,OBFC1,PLEKHA3,PBX2,LPP,KANK2,ACADVL,GTF3C2,CADM1,RAI1,PSMB10,XRN1,CKB,IGF1R,AVL9,LAMB1,NPHP3,PTS,TNRC6A,MYO1D,SIRT2,EPHX2,UTRN,RALGAPA2,MYNN,TRNAU1AP,RAI14,NOC2L,PPIL2,TARS,RAF1,NLRP1,ZNF131,SEPT5,TSTD1,LEPRE1,SLC16A3,PPP1R13B,GAS8,COL9A1,RSC1A1,SFSWAP,CDK13,RBM6,BDNF,TAZ,SIN3B,SPOP,CPE,CBX5,SART1,COL2A1,CCDC91,RAB34,SUPT5H,SUPT20H,RILPL1,HLA-DPB1,ST3GAL1,MARCH5,UBXN1,DPP4,PWP1,FBXO32,LUC7L,BCL6,FUBP1,ZNF783,CMPK2,TBX2,ENOSF1,PTPN22,MMS19,SHMT2,ZFP91,CNTF,PLD1,VAPB,NLN,GPAA1,CUX1,PGS1,RBM17,CLNS1A,NUP98,EED,SLC9B2,AMT,FMR1,SMPD4,SMAD7,USP4,HDAC6,GLG1,EHMT1,ATP6V1D,VRK2,DYNC1I1,ZNF496,HGS,DERL2,IL15RA,NARS,LANCL2,H6PD,SYTL4,TTLL3,ARPC4-TTLL3,PNKP,LEF1,GLS,PAX8,HLA-C,SUPT4H1,ZNF83,PSMB9,EMX2,ARHGEF25,YIPF1,ADAMTS1,RGL4,BCL2L13,BCL2L11,RBPMS,XYLT1,GLOD4,STARD13,ZSCAN31,STARD9,XBP1,COG4,CPM,FDPS,NISCH,PAM,ABCC1,NOM1,CEP135,GLT8D1,SNRNP70,HSD17B12,DDX23,HLA-DQA1,RAD23A,AP3S2,METTL3,APITD1,MPDU1,MARK4,UHMK1,ADAM8,MAP7D1,NOL3,POLR3E,CAPZB,GABPB1,PRPF40A,DNAJC10,RAB35,XAF1,CD9,PCGF6,RANBP1,SIPA1L1,MARCH6,DDX39A,KRIT1,KPNA6,SKIV2L,MINK1,PDLIM5,RNF24,RHOF,PTPN6,SUGP1,EEF1A1,ACTR3,LHX4,VASP,CMIP,CSNK2A1,UPF3A,PRKACA,STAT2,ANAPC4,RPP14,DHX9,PIGS,PLK1,SDCCAG8,ZNF446,VPS52,LMAN2,COL16A1,NUTF2,TTC19,DNM1L,TXNL1,PTGES2,UPF1,ZNF621,HDGF,FDXR,RC3H1,PPP5C,PIGG,PDXK,NPC1,SHISA5,CCNL1,HERC2,CHD6,ZC3H12A,NUP210,SEPT4,MIB2,POLM,SLC11A2,DIP2A,SYMPK,EFTUD2,RAB24,CNP,CLN8,TBX18,PIGN,GCDH,LBX2,PCGF1,VAMP7,DR1,BCLAF1,CAMK2D,FYTTD1,ZNF721,HLA-DMB,ZNF397,JHDM1D,SLC16A1,ZNF710,PLCB4,BBS1,TBC1D14,PRPF3,TNK2,COL14A1,GIT2,FLG,WAC,STK4,ZNF142,FUBP3,TRO,MTG1,CCDC14,RARS,ZNF540,SIKE1,ALDH18A1,TPCN2,COPS7B,VTI1A,FGFR1,HPS4,HSF4,CAPRIN1,GTF3C1,MMP16,PMS1,CELF1,SNCAIP,PDE4D,AFAP1,RNASET2,SF3A2,TIMM23,PAF1,TAB2,SGK1,SHARPIN,DPF2,TCHP,CPT1B,IDI1,RNF8,CDYL2,KIAA0586,CYP2R1,SEC31A,MDM2,RHBDD1,SNAP23,COL12A1,FKBP1A,ZFYVE26,DAZAP1,ANAPC16,ZNF595,TBP,DIS3L,IDH3G,YY1,TLN2,INO80,GPAT2,GMEB2,SSH2,MCFD2,PFDN5,TTC1,CREB1,TRAF3IP1,SRP9,FLII,QSOX1,RPRD1A,CCNDBP1,DDX58,ALDH6A1,RPL27,CCNL2,PTPRK,SNX13,AP4B1,RHBDF1,SERPINH1,SNX21,NF1,ZEB1,ACAA1,NEK3,SERBP1,SETBP1,NUB1,IFITM3,EMC3,LGALS3BP,NUMA1,TPM4,RGMB,COL18A1,EBF1,RPL9,MED28,PHF15,FKBP10,UNKL,ZNF3,RPS6KA5,G3BP1,NIPBL,RAB31,ALKBH3,ADSL,ALG6,ST3GAL4,DCAF8,GCNT2,ZNF837,PKD2,CASP2,HNRNPA3,RXRB,GALT,UBAC1,LMNA,NUDT6,RSL1D1,MITF,NOL8,PPP2R3C,RB1,GOLGA8B,GOLGA8A,PRMT5,HMGXB3,MAPK8IP3,GNAI1,USP3,PLEKHA2,STX16,DHRS1,MZF1,ZFPM2,TP53BP1,BLOC1S5,TXNDC5,NEXN,RNF168,PAFAH1B1,ZNF865,LYRM2,SENP2,EDEM2,RPS19BP1,PUM2,MTCH1,SLFN11,CALCOCO2,STARD3,TPP1,SYTL2,DNALI1,SUB1,PWP2,CHMP1A,NSA2,ARPC2,SYNE1,STK38L,EPN2,DDX6,ZNF558,ANXA5,GALNT2,ADAM15,SH3BP5,MUM1,ZNF263,ZNF180,BICD1,NTMT1,ZNF276,RGS3,GCC2,NR1H3,GARS,CYTH2,CCDC115,MRPS7,PLK2,PAN2,HEXA,USP7,PLD6,FLCN,NRP1,ZNF605,CHFR,ZNF410,FAM172A,FMO2,RPL24,IGFBP6,DAAM1,UST,RPL37A,SAP30BP,MAST2,STX2,VPS72,PTEN,FYN,IDH1,SRPK1,RUNX2,CSTF1,IQGAP1,FBXW7,CEP112,INTS4,PTP4A2,LGMN,SMARCD3,HERPUD1,IFT172,IKBKB,CTNS,RQCD1,SNX17,GGNBP2,PXN,KPNB1,SRGAP2,RFX7,NCOR1,ATP11B,PPP1R10,MEF2A,DYM,OXCT1,PARN,ZMYM5,TNS1,FECH,ERAL1,PRKRIP1,SETD8,COX7A2L,SMEK1,WASH4P,ITGB5,TMEM189,TCTN1,STK19,NECAB3 | 1.183048568 | 1.24E-19 |
| GO:0043229 | intracellular organelle | cellular_component | MARVELD1,CDK14,USP10,RNASEH2B,SLC25A37,CRBN,OBFC1,PLEKHA3,PBX2,LPP,KANK2,ACADVL,GTF3C2,CADM1,RAI1,PSMB10,XRN1,CKB,IGF1R,AVL9,NPHP3,PTS,TNRC6A,MYO1D,SIRT2,EPHX2,UTRN,RALGAPA2,MYNN,TRNAU1AP,RAI14,NOC2L,PPIL2,TARS,RAF1,NLRP1,ZNF131,SEPT5,TSTD1,LEPRE1,SLC16A3,PPP1R13B,GAS8,COL9A1,RSC1A1,SFSWAP,CDK13,RBM6,BDNF,TAZ,SIN3B,SPOP,CPE,CBX5,SART1,COL2A1,CCDC91,RAB34,SUPT5H,SUPT20H,RILPL1,HLA-DPB1,ST3GAL1,MARCH5,UBXN1,DPP4,PWP1,FBXO32,LUC7L,BCL6,FUBP1,ZNF783,CMPK2,TBX2,ENOSF1,PTPN22,MMS19,SHMT2,ZFP91,CNTF,PLD1,VAPB,NLN,GPAA1,CUX1,PGS1,RBM17,CLNS1A,NUP98,EED,SLC9B2,AMT,FMR1,SMPD4,SMAD7,USP4,HDAC6,GLG1,EHMT1,ATP6V1D,VRK2,DYNC1I1,ZNF496,HGS,DERL2,IL15RA,NARS,LANCL2,H6PD,SYTL4,TTLL3,ARPC4-TTLL3,PNKP,LEF1,GLS,PAX8,HLA-C,SUPT4H1,ZNF83,PSMB9,EMX2,ARHGEF25,YIPF1,ADAMTS1,RGL4,BCL2L13,BCL2L11,RBPMS,XYLT1,GLOD4,STARD13,ZSCAN31,STARD9,XBP1,COG4,CPM,FDPS,NISCH,PAM,ABCC1,NOM1,CEP135,GLT8D1,SNRNP70,HSD17B12,DDX23,HLA-DQA1,RAD23A,AP3S2,METTL3,APITD1,MPDU1,MARK4,UHMK1,ADAM8,MAP7D1,NOL3,POLR3E,CAPZB,GABPB1,PRPF40A,DNAJC10,RAB35,XAF1,CD9,PCGF6,RANBP1,SIPA1L1,MARCH6,DDX39A,KRIT1,KPNA6,SKIV2L,MINK1,PDLIM5,RNF24,RHOF,PTPN6,SUGP1,EEF1A1,ACTR3,LHX4,VASP,CMIP,CSNK2A1,UPF3A,PRKACA,STAT2,ANAPC4,RPP14,DHX9,PIGS,PLK1,SDCCAG8,ZNF446,VPS52,LMAN2,COL16A1,NUTF2,TTC19,DNM1L,TXNL1,PTGES2,UPF1,ZNF621,HDGF,FDXR,RC3H1,PPP5C,PIGG,PDXK,NPC1,SHISA5,CCNL1,HERC2,CHD6,ZC3H12A,NUP210,SEPT4,MIB2,POLM,SLC11A2,DIP2A,SYMPK,EFTUD2,RAB24,CNP,CLN8,TBX18,PIGN,GCDH,LBX2,PCGF1,VAMP7,DR1,BCLAF1,CAMK2D,FYTTD1,ZNF721,HLA-DMB,ZNF397,JHDM1D,SLC16A1,ZNF710,PLCB4,BBS1,TBC1D14,PRPF3,TNK2,COL14A1,GIT2,FLG,WAC,STK4,ZNF142,FUBP3,TRO,MTG1,CCDC14,RARS,ZNF540,SIKE1,ALDH18A1,TPCN2,COPS7B,VTI1A,FGFR1,HPS4,HSF4,CAPRIN1,GTF3C1,MMP16,PMS1,CELF1,SNCAIP,PDE4D,AFAP1,RNASET2,SF3A2,TIMM23,PAF1,TAB2,SGK1,SHARPIN,DPF2,TCHP,CPT1B,IDI1,RNF8,CDYL2,KIAA0586,CYP2R1,SEC31A,MDM2,RHBDD1,SNAP23,COL12A1,FKBP1A,ZFYVE26,DAZAP1,ANAPC16,ZNF595,TBP,DIS3L,IDH3G,YY1,TLN2,INO80,GPAT2,GMEB2,SSH2,MCFD2,PFDN5,TTC1,CREB1,TRAF3IP1,SRP9,FLII,QSOX1,RPRD1A,CCNDBP1,DDX58,ALDH6A1,RPL27,CCNL2,PTPRK,SNX13,AP4B1,RHBDF1,SERPINH1,SNX21,NF1,ZEB1,ACAA1,NEK3,SERBP1,SETBP1,NUB1,IFITM3,EMC3,NUMA1,TPM4,RGMB,COL18A1,EBF1,RPL9,MED28,PHF15,FKBP10,UNKL,ZNF3,RPS6KA5,G3BP1,NIPBL,RAB31,ALKBH3,ADSL,ALG6,ST3GAL4,DCAF8,GCNT2,ZNF837,PKD2,CASP2,HNRNPA3,RXRB,GALT,UBAC1,LMNA,NUDT6,RSL1D1,MITF,NOL8,PPP2R3C,RB1,GOLGA8B,GOLGA8A,PRMT5,HMGXB3,MAPK8IP3,GNAI1,USP3,PLEKHA2,STX16,DHRS1,MZF1,ZFPM2,TP53BP1,BLOC1S5,TXNDC5,NEXN,RNF168,PAFAH1B1,ZNF865,LYRM2,SENP2,EDEM2,RPS19BP1,PUM2,MTCH1,SLFN11,CALCOCO2,STARD3,TPP1,SYTL2,DNALI1,SUB1,PWP2,CHMP1A,NSA2,ARPC2,SYNE1,STK38L,EPN2,DDX6,ZNF558,GALNT2,ADAM15,SH3BP5,MUM1,ZNF263,ZNF180,BICD1,NTMT1,ZNF276,RGS3,GCC2,NR1H3,GARS,CYTH2,CCDC115,MRPS7,PLK2,PAN2,HEXA,USP7,PLD6,FLCN,NRP1,ZNF605,CHFR,ZNF410,FAM172A,FMO2,RPL24,IGFBP6,DAAM1,UST,RPL37A,SAP30BP,MAST2,STX2,VPS72,PTEN,FYN,IDH1,SRPK1,RUNX2,CSTF1,IQGAP1,FBXW7,CEP112,INTS4,PTP4A2,LGMN,SMARCD3,HERPUD1,IFT172,IKBKB,CTNS,RQCD1,SNX17,GGNBP2,PXN,KPNB1,SRGAP2,RFX7,NCOR1,ATP11B,PPP1R10,MEF2A,DYM,OXCT1,PARN,ZMYM5,TNS1,FECH,ERAL1,PRKRIP1,SETD8,COX7A2L,SMEK1,WASH4P,ITGB5,TMEM189,TCTN1,STK19,NECAB3,PIAS2,FIBP,SSBP1 | 1.181136163 | 4.24E-19 |
| GO:0043227 | membrane-bounded organelle | cellular_component | MARVELD1,CDK14,USP10,RNASEH2B,SLC25A37,CRBN,OBFC1,PLEKHA3,PBX2,LPP,KANK2,ACADVL,GTF3C2,CADM1,RAI1,PSMB10,XRN1,CKB,IGF1R,AVL9,LAMB1,NPHP3,PTS,MYO1D,SIRT2,EPHX2,UTRN,RALGAPA2,MYNN,TRNAU1AP,RAI14,NOC2L,PPIL2,RAF1,NLRP1,ZNF131,SEPT5,TSTD1,LEPRE1,SLC16A3,PPP1R13B,GAS8,COL9A1,RSC1A1,SFSWAP,CDK13,RBM6,BDNF,TAZ,SIN3B,SPOP,CPE,CBX5,SART1,COL2A1,CCDC91,RAB34,SUPT5H,SUPT20H,RILPL1,HLA-DPB1,ST3GAL1,MARCH5,UBXN1,DPP4,PWP1,FBXO32,LUC7L,BCL6,FUBP1,ZNF783,CMPK2,TBX2,ENOSF1,PTPN22,MMS19,SHMT2,ZFP91,CNTF,PLD1,VAPB,NLN,GPAA1,CUX1,PGS1,RBM17,CLNS1A,NUP98,EED,SLC9B2,AMT,FMR1,SMPD4,SMAD7,USP4,HDAC6,GLG1,EHMT1,ATP6V1D,VRK2,ZNF496,HGS,DERL2,IL15RA,NARS,LANCL2,H6PD,SYTL4,TTLL3,PNKP,LEF1,GLS,PAX8,HLA-C,SUPT4H1,ZNF83,PSMB9,EMX2,YIPF1,RGL4,BCL2L13,BCL2L11,RBPMS,XYLT1,GLOD4,STARD13,ZSCAN31,STARD9,XBP1,COG4,CPM,FDPS,NISCH,PAM,ABCC1,NOM1,GLT8D1,SNRNP70,HSD17B12,DDX23,HLA-DQA1,RAD23A,AP3S2,METTL3,APITD1,MPDU1,UHMK1,ADAM8,NOL3,POLR3E,GABPB1,PRPF40A,DNAJC10,RAB35,XAF1,CD9,PCGF6,RANBP1,MARCH6,DDX39A,KPNA6,SKIV2L,MINK1,RNF24,PTPN6,SUGP1,EEF1A1,ACTR3,LHX4,CMIP,CSNK2A1,UPF3A,PRKACA,STAT2,ANAPC4,RPP14,DHX9,PIGS,PLK1,ZNF446,VPS52,LMAN2,COL16A1,NUTF2,TTC19,DNM1L,TXNL1,PTGES2,UPF1,ZNF621,HDGF,FDXR,PPP5C,PIGG,PDXK,NPC1,SHISA5,CCNL1,HERC2,CHD6,ZC3H12A,NUP210,SEPT4,MIB2,POLM,SLC11A2,DIP2A,SYMPK,EFTUD2,RAB24,CNP,CLN8,TBX18,PIGN,GCDH,LBX2,PCGF1,VAMP7,DR1,BCLAF1,CAMK2D,FYTTD1,ZNF721,HLA-DMB,ZNF397,JHDM1D,SLC16A1,ZNF710,PLCB4,BBS1,TBC1D14,PRPF3,TNK2,COL14A1,GIT2,FLG,WAC,STK4,ZNF142,FUBP3,TRO,MTG1,RARS,ZNF540,SIKE1,ALDH18A1,TPCN2,COPS7B,VTI1A,FGFR1,HPS4,HSF4,GTF3C1,MMP16,PMS1,CELF1,SNCAIP,RNASET2,SF3A2,TIMM23,PAF1,TAB2,SGK1,DPF2,TCHP,CPT1B,IDI1,RNF8,CDYL2,CYP2R1,SEC31A,MDM2,RHBDD1,SNAP23,COL12A1,FKBP1A,DAZAP1,ANAPC16,ZNF595,TBP,IDH3G,YY1,INO80,GPAT2,GMEB2,MCFD2,PFDN5,TTC1,CREB1,SRP9,FLII,QSOX1,RPRD1A,CCNDBP1,ALDH6A1,CCNL2,PTPRK,SNX13,AP4B1,RHBDF1,SERPINH1,SNX21,NF1,ZEB1,ACAA1,NEK3,SERBP1,SETBP1,NUB1,IFITM3,EMC3,LGALS3BP,NUMA1,RGMB,COL18A1,EBF1,RPL9,MED28,PHF15,FKBP10,UNKL,ZNF3,RPS6KA5,G3BP1,NIPBL,RAB31,ALKBH3,ADSL,ALG6,ST3GAL4,DCAF8,GCNT2,ZNF837,PKD2,CASP2,HNRNPA3,RXRB,GALT,UBAC1,LMNA,NUDT6,RSL1D1,MITF,NOL8,PPP2R3C,RB1,GOLGA8B,GOLGA8A,PRMT5,HMGXB3,MAPK8IP3,GNAI1,USP3,PLEKHA2,STX16,DHRS1,MZF1,ZFPM2,TP53BP1,BLOC1S5,TXNDC5,RNF168,PAFAH1B1,ZNF865,LYRM2,SENP2,EDEM2,RPS19BP1,MTCH1,SLFN11,CALCOCO2,STARD3,TPP1,SYTL2,DNALI1,SUB1,PWP2,CHMP1A,NSA2,ARPC2,SYNE1,STK38L,EPN2,ZNF558,ANXA5,GALNT2,ADAM15,SH3BP5,MUM1,ZNF263,ZNF180,BICD1,NTMT1,ZNF276,RGS3,GCC2,NR1H3,GARS,CYTH2,CCDC115,MRPS7,PAN2,HEXA,USP7,PLD6,FLCN,ZNF605,CHFR,ZNF410,FAM172A,FMO2,IGFBP6,UST,SAP30BP,STX2,VPS72,PTEN,FYN,IDH1,SRPK1,RUNX2,CSTF1,IQGAP1,FBXW7,INTS4,PTP4A2,LGMN,SMARCD3,HERPUD1,IFT172,IKBKB,CTNS,RQCD1,SNX17,GGNBP2,KPNB1,SRGAP2,RFX7,NCOR1,ATP11B,PPP1R10,MEF2A,DYM,OXCT1,PARN,ZMYM5,FECH,ERAL1,PRKRIP1,SETD8,COX7A2L,SMEK1,WASH4P,ITGB5,TMEM189,TCTN1,STK19,NECAB3,PIAS2,FIBP,SSBP1,CLSTN2,CACNB1,MAPK8,MYCBP2,CLTCL1,USP15,DDX41,MAN1A2,SRRM2,OSBPL3,PBX3,HLA-F,ZNF565,ABCA2,RAB8A,ZFAND2B,AFF4,SLC35D2,TRIM28,DENND4C,DMTF1,CSK,CDK5RAP2,COL9A3,PSMC6,TMEM66,SWAP70,RPF2,STX18,IMPDH1,RNF146,UBP1,EMC4,SKIV2L2,DSN1,CDK6,NSFL1C,AGBL5,WDR61,EBF4 | 1.201722553 | 2.33E-18 |
| GO:0044446 | intracellular organelle part | cellular_component | RNASEH2B,SLC25A37,CRBN,OBFC1,PBX2,ACADVL,GTF3C2,PSMB10,MYO1D,SIRT2,EPHX2,UTRN,NOC2L,PPIL2,RAF1,SEPT5,LEPRE1,SLC16A3,PPP1R13B,GAS8,COL9A1,RSC1A1,CDK13,TAZ,SIN3B,CPE,CBX5,SART1,COL2A1,CCDC91,RAB34,SUPT5H,SUPT20H,RILPL1,HLA-DPB1,ST3GAL1,MARCH5,UBXN1,BCL6,FUBP1,CMPK2,TBX2,MMS19,SHMT2,ZFP91,PLD1,VAPB,NLN,GPAA1,CUX1,PGS1,RBM17,NUP98,EED,SLC9B2,FMR1,SMPD4,SMAD7,HDAC6,GLG1,ATP6V1D,VRK2,DYNC1I1,ZNF496,HGS,DERL2,IL15RA,LANCL2,H6PD,SYTL4,TTLL3,ARPC4-TTLL3,PNKP,LEF1,GLS,PAX8,HLA-C,SUPT4H1,PSMB9,BCL2L13,BCL2L11,XYLT1,STARD13,STARD9,XBP1,COG4,CPM,FDPS,PAM,ABCC1,NOM1,CEP135,SNRNP70,HSD17B12,DDX23,HLA-DQA1,AP3S2,METTL3,APITD1,MPDU1,MARK4,ADAM8,MAP7D1,NOL3,POLR3E,CAPZB,PRPF40A,DNAJC10,CD9,PCGF6,RANBP1,SIPA1L1,MARCH6,MINK1,PDLIM5,RNF24,SUGP1,ACTR3,CSNK2A1,UPF3A,PRKACA,STAT2,ANAPC4,DHX9,PIGS,PLK1,SDCCAG8,VPS52,LMAN2,COL16A1,NUTF2,TTC19,DNM1L,PTGES2,UPF1,HDGF,FDXR,PIGG,PDXK,NPC1,SHISA5,CCNL1,HERC2,ZC3H12A,NUP210,SEPT4,SLC11A2,SYMPK,EFTUD2,CNP,CLN8,PIGN,GCDH,PCGF1,VAMP7,DR1,BCLAF1,CAMK2D,FYTTD1,HLA-DMB,JHDM1D,PLCB4,BBS1,PRPF3,TNK2,COL14A1,GIT2,FLG,WAC,MTG1,CCDC14,RARS,ALDH18A1,TPCN2,COPS7B,VTI1A,GTF3C1,MMP16,PMS1,SNCAIP,PDE4D,RNASET2,SF3A2,TIMM23,PAF1,TAB2,SGK1,SHARPIN,DPF2,TCHP,CPT1B,RNF8,KIAA0586,CYP2R1,SEC31A,MDM2,RHBDD1,SNAP23,COL12A1,FKBP1A,ZFYVE26,DAZAP1,ANAPC16,TBP,DIS3L,IDH3G,YY1,INO80,GPAT2,GMEB2,MCFD2,TTC1,CREB1,SRP9,FLII,QSOX1,RPRD1A,ALDH6A1,RPL27,CCNL2,SNX13,RHBDF1,SERPINH1,SNX21,ZEB1,ACAA1,IFITM3,EMC3,NUMA1,TPM4,COL18A1,RPL9,MED28,PHF15,FKBP10,ZNF3,RPS6KA5,NIPBL,RAB31,ALKBH3,ALG6,ST3GAL4,GCNT2,PKD2,HNRNPA3,RXRB,LMNA,RSL1D1,NOL8,PPP2R3C,RB1,GOLGA8B,GOLGA8A,MAPK8IP3,GNAI1,USP3,STX16,DHRS1,ZFPM2,TP53BP1,TXNDC5,RNF168,PAFAH1B1,SENP2,EDEM2,RPS19BP1,MTCH1,CALCOCO2,STARD3,TPP1,DNALI1,SUB1,PWP2,CHMP1A,NSA2,ARPC2,SYNE1,STK38L,EPN2,GALNT2,ZNF263,BICD1,NTMT1,NR1H3,GARS,MRPS7,PLK2,HEXA,USP7,PLD6,NRP1,CHFR,FMO2,RPL24,DAAM1,UST,RPL37A,SAP30BP,PTEN,FYN,IDH1,SRPK1,RUNX2,CSTF1,IQGAP1,FBXW7,CEP112,INTS4,LGMN,SMARCD3,HERPUD1,CTNS,SNX17,PXN,KPNB1,SRGAP2,NCOR1,ATP11B,PPP1R10,MEF2A,OXCT1,PARN,FECH,ERAL1,PRKRIP1,COX7A2L,SMEK1,WASH4P,TMEM189,TCTN1,NECAB3,PIAS2,SSBP1,CLSTN2,MAPK8,CLTCL1,MYLK,DDX41,MAN1A2,SRRM2,OSBPL3,PBX3,HLA-F,ABCA2,RAB8A,AFF4,SLC35D2,TRIM28,DENND4C,DMTF1,CSK,CDK5RAP2,COL9A3,PSMC6,TMEM66,RPF2,STX18,TBCD,EMC4,SKIV2L2,DSN1,NSFL1C,WDR61,NUP37,PRPF8,DDHD2,COX14,APPL2,ZNF148,CLTB,FLOT1,WDR13,PSMC4,HNRNPL,KIFC2,STAG2,SP110,GOPC,RANBP9,PPA2,ST6GALNAC5,WDR35,ATPAF2,PAK1,EVC,LEPROT,RAB10,RHEB,HNRNPH3,VPS45,TCF4,ACD,HMGN2,WDR4,ATP6V0A1,ERC1,TIMM50,OS9,DGKZ,ACTR2,NFYC,P4HB,HSD17B4,ELOVL1,FUT4,SRSF10,TMED3,SS18,SMAD4,GRPEL2,FNTB,KLC1,NAV1,TGFB1I1,SLC35A4,INO80E,DTYMK,SLC39A7,EZR,RPL4,MTRR,CENPT,MBOAT2,ZNF44,AUP1,GOLPH3,ING4,ZNF687,CDC14B,CLK3,DNHD1,NR2C2,FHOD1,FIP1L1,DLST,DNTTIP2,LRPAP1,MRPL49,FLNA,RAB5A,IRF9,CA5B,SUN2,MSL1,HGSNAT,MGAT5,BCS1L,ACTR10,ATP5A1,GLI3,TMED2,ADD3,NDUFV1,MAPK12,NDUFS2,RASGRF2,AK5,GUSB,THOC2,MCOLN1,B4GALT4,ENG,SCFD1,SIRT7,TCF12,PCSK7,ARNT,NOX4,ETFA,EXT1,ERCC1,PHF1,GAA,B3GAT3,SLC25A6,PRELID1,SDHA,PHF12,PDIA5,TBCE,VAMP4,REXO2,MED6,CIRBP,NUP85,IDH3B,HAUS5,RGS2,CLIP2,HINFP,STAM2,NCBP2,MAN2A2,LPCAT1,PDGFRB,COL8A1,EBPL,VPS51,TGS1,DZIP1,NCAPD3 | 1.295257014 | 3.88E-18 |
| GO:0043231 | intracellular membrane-bounded organelle | cellular_component | MARVELD1,CDK14,USP10,RNASEH2B,SLC25A37,CRBN,OBFC1,PLEKHA3,PBX2,LPP,KANK2,ACADVL,GTF3C2,CADM1,RAI1,PSMB10,XRN1,CKB,IGF1R,AVL9,NPHP3,PTS,MYO1D,SIRT2,EPHX2,UTRN,RALGAPA2,MYNN,TRNAU1AP,RAI14,NOC2L,PPIL2,RAF1,NLRP1,ZNF131,SEPT5,TSTD1,LEPRE1,SLC16A3,PPP1R13B,GAS8,COL9A1,RSC1A1,SFSWAP,CDK13,RBM6,BDNF,TAZ,SIN3B,SPOP,CPE,CBX5,SART1,COL2A1,CCDC91,RAB34,SUPT5H,SUPT20H,RILPL1,HLA-DPB1,ST3GAL1,MARCH5,UBXN1,DPP4,PWP1,FBXO32,LUC7L,BCL6,FUBP1,ZNF783,CMPK2,TBX2,ENOSF1,PTPN22,MMS19,SHMT2,ZFP91,CNTF,PLD1,VAPB,NLN,GPAA1,CUX1,PGS1,RBM17,CLNS1A,NUP98,EED,SLC9B2,AMT,FMR1,SMPD4,SMAD7,USP4,HDAC6,GLG1,EHMT1,ATP6V1D,VRK2,ZNF496,HGS,DERL2,IL15RA,NARS,LANCL2,H6PD,SYTL4,TTLL3,PNKP,LEF1,GLS,PAX8,HLA-C,SUPT4H1,ZNF83,PSMB9,EMX2,YIPF1,RGL4,BCL2L13,BCL2L11,RBPMS,XYLT1,GLOD4,STARD13,ZSCAN31,STARD9,XBP1,COG4,CPM,FDPS,NISCH,PAM,ABCC1,NOM1,GLT8D1,SNRNP70,HSD17B12,DDX23,HLA-DQA1,RAD23A,AP3S2,METTL3,APITD1,MPDU1,UHMK1,ADAM8,NOL3,POLR3E,GABPB1,PRPF40A,DNAJC10,RAB35,XAF1,CD9,PCGF6,RANBP1,MARCH6,DDX39A,KPNA6,SKIV2L,MINK1,RNF24,PTPN6,SUGP1,EEF1A1,ACTR3,LHX4,CMIP,CSNK2A1,UPF3A,PRKACA,STAT2,ANAPC4,RPP14,DHX9,PIGS,PLK1,ZNF446,VPS52,LMAN2,COL16A1,NUTF2,TTC19,DNM1L,TXNL1,PTGES2,UPF1,ZNF621,HDGF,FDXR,PPP5C,PIGG,PDXK,NPC1,SHISA5,CCNL1,HERC2,CHD6,ZC3H12A,NUP210,SEPT4,MIB2,POLM,SLC11A2,DIP2A,SYMPK,EFTUD2,RAB24,CNP,CLN8,TBX18,PIGN,GCDH,LBX2,PCGF1,VAMP7,DR1,BCLAF1,CAMK2D,FYTTD1,ZNF721,HLA-DMB,ZNF397,JHDM1D,SLC16A1,ZNF710,PLCB4,BBS1,TBC1D14,PRPF3,TNK2,COL14A1,GIT2,FLG,WAC,STK4,ZNF142,FUBP3,TRO,MTG1,RARS,ZNF540,SIKE1,ALDH18A1,TPCN2,COPS7B,VTI1A,FGFR1,HPS4,HSF4,GTF3C1,MMP16,PMS1,CELF1,SNCAIP,RNASET2,SF3A2,TIMM23,PAF1,TAB2,SGK1,DPF2,TCHP,CPT1B,IDI1,RNF8,CDYL2,CYP2R1,SEC31A,MDM2,RHBDD1,SNAP23,COL12A1,FKBP1A,DAZAP1,ANAPC16,ZNF595,TBP,IDH3G,YY1,INO80,GPAT2,GMEB2,MCFD2,PFDN5,TTC1,CREB1,SRP9,FLII,QSOX1,RPRD1A,CCNDBP1,ALDH6A1,CCNL2,PTPRK,SNX13,AP4B1,RHBDF1,SERPINH1,SNX21,NF1,ZEB1,ACAA1,NEK3,SERBP1,SETBP1,NUB1,IFITM3,EMC3,NUMA1,RGMB,COL18A1,EBF1,RPL9,MED28,PHF15,FKBP10,UNKL,ZNF3,RPS6KA5,G3BP1,NIPBL,RAB31,ALKBH3,ADSL,ALG6,ST3GAL4,DCAF8,GCNT2,ZNF837,PKD2,CASP2,HNRNPA3,RXRB,GALT,UBAC1,LMNA,NUDT6,RSL1D1,MITF,NOL8,PPP2R3C,RB1,GOLGA8B,GOLGA8A,PRMT5,HMGXB3,MAPK8IP3,GNAI1,USP3,PLEKHA2,STX16,DHRS1,MZF1,ZFPM2,TP53BP1,BLOC1S5,TXNDC5,RNF168,PAFAH1B1,ZNF865,LYRM2,SENP2,EDEM2,RPS19BP1,MTCH1,SLFN11,CALCOCO2,STARD3,TPP1,SYTL2,DNALI1,SUB1,PWP2,CHMP1A,NSA2,ARPC2,SYNE1,STK38L,EPN2,ZNF558,GALNT2,ADAM15,SH3BP5,MUM1,ZNF263,ZNF180,BICD1,NTMT1,ZNF276,RGS3,GCC2,NR1H3,GARS,CYTH2,CCDC115,MRPS7,PAN2,HEXA,USP7,PLD6,FLCN,ZNF605,CHFR,ZNF410,FAM172A,FMO2,IGFBP6,UST,SAP30BP,STX2,VPS72,PTEN,FYN,IDH1,SRPK1,RUNX2,CSTF1,IQGAP1,FBXW7,INTS4,PTP4A2,LGMN,SMARCD3,HERPUD1,IFT172,IKBKB,CTNS,RQCD1,SNX17,GGNBP2,KPNB1,SRGAP2,RFX7,NCOR1,ATP11B,PPP1R10,MEF2A,DYM,OXCT1,PARN,ZMYM5,FECH,ERAL1,PRKRIP1,SETD8,COX7A2L,SMEK1,WASH4P,ITGB5,TMEM189,TCTN1,STK19,NECAB3,PIAS2,FIBP,SSBP1,CLSTN2,CACNB1,MAPK8,MYCBP2,CLTCL1,USP15,DDX41,MAN1A2,SRRM2,OSBPL3,PBX3,HLA-F,ZNF565,ABCA2,RAB8A,ZFAND2B,AFF4,SLC35D2,TRIM28,DENND4C,DMTF1,CSK,CDK5RAP2,COL9A3,PSMC6,TMEM66,SWAP70,RPF2,STX18,IMPDH1,RNF146,UBP1,EMC4,SKIV2L2,DSN1,CDK6,NSFL1C,AGBL5,WDR61,EBF4,NUP37,PRPF8,DDHD2 | 1.199921382 | 6.43E-18 |
| GO:0044422 | organelle part | cellular_component | RNASEH2B,SLC25A37,CRBN,OBFC1,PBX2,ACADVL,GTF3C2,PSMB10,MYO1D,SIRT2,EPHX2,UTRN,NOC2L,PPIL2,RAF1,SEPT5,LEPRE1,SLC16A3,PPP1R13B,GAS8,COL9A1,RSC1A1,CDK13,TAZ,SIN3B,CPE,CBX5,SART1,COL2A1,CCDC91,RAB34,SUPT5H,SUPT20H,RILPL1,HLA-DPB1,ST3GAL1,MARCH5,UBXN1,BCL6,FUBP1,CMPK2,TBX2,MMS19,SHMT2,ZFP91,PLD1,VAPB,NLN,GPAA1,CUX1,PGS1,RBM17,NUP98,EED,SLC9B2,FMR1,SMPD4,SMAD7,HDAC6,GLG1,ATP6V1D,VRK2,DYNC1I1,ZNF496,HGS,DERL2,IL15RA,LANCL2,H6PD,SYTL4,TTLL3,ARPC4-TTLL3,PNKP,LEF1,GLS,PAX8,HLA-C,SUPT4H1,PSMB9,ARHGEF25,BCL2L13,BCL2L11,XYLT1,STARD13,STARD9,XBP1,COG4,CPM,FDPS,PAM,ABCC1,NOM1,CEP135,SNRNP70,HSD17B12,DDX23,HLA-DQA1,AP3S2,METTL3,APITD1,MPDU1,MARK4,ADAM8,MAP7D1,NOL3,POLR3E,CAPZB,PRPF40A,DNAJC10,CD9,PCGF6,RANBP1,SIPA1L1,MARCH6,MINK1,PDLIM5,RNF24,SUGP1,ACTR3,CSNK2A1,UPF3A,PRKACA,STAT2,ANAPC4,DHX9,PIGS,PLK1,SDCCAG8,VPS52,LMAN2,COL16A1,NUTF2,TTC19,DNM1L,PTGES2,UPF1,HDGF,FDXR,PIGG,PDXK,NPC1,SHISA5,CCNL1,HERC2,ZC3H12A,NUP210,SEPT4,SLC11A2,SYMPK,EFTUD2,CNP,CLN8,PIGN,GCDH,PCGF1,VAMP7,DR1,BCLAF1,CAMK2D,FYTTD1,HLA-DMB,JHDM1D,PLCB4,BBS1,PRPF3,TNK2,COL14A1,GIT2,FLG,WAC,MTG1,CCDC14,RARS,ALDH18A1,TPCN2,COPS7B,VTI1A,GTF3C1,MMP16,PMS1,SNCAIP,PDE4D,RNASET2,SF3A2,TIMM23,PAF1,TAB2,SGK1,SHARPIN,DPF2,TCHP,CPT1B,RNF8,KIAA0586,CYP2R1,SEC31A,MDM2,RHBDD1,SNAP23,COL12A1,FKBP1A,ZFYVE26,DAZAP1,ANAPC16,TBP,DIS3L,IDH3G,YY1,INO80,GPAT2,GMEB2,MCFD2,TTC1,CREB1,SRP9,FLII,QSOX1,RPRD1A,ALDH6A1,RPL27,CCNL2,SNX13,RHBDF1,SERPINH1,SNX21,ZEB1,ACAA1,IFITM3,EMC3,NUMA1,TPM4,COL18A1,RPL9,MED28,PHF15,FKBP10,ZNF3,RPS6KA5,NIPBL,RAB31,ALKBH3,ALG6,ST3GAL4,GCNT2,PKD2,HNRNPA3,RXRB,LMNA,RSL1D1,NOL8,PPP2R3C,RB1,GOLGA8B,GOLGA8A,MAPK8IP3,GNAI1,USP3,STX16,DHRS1,ZFPM2,TP53BP1,TXNDC5,NEXN,RNF168,PAFAH1B1,SENP2,EDEM2,RPS19BP1,MTCH1,CALCOCO2,STARD3,TPP1,DNALI1,SUB1,PWP2,CHMP1A,NSA2,ARPC2,SYNE1,STK38L,EPN2,GALNT2,ZNF263,BICD1,NTMT1,NR1H3,GARS,MRPS7,PLK2,HEXA,USP7,PLD6,NRP1,CHFR,FMO2,RPL24,DAAM1,UST,RPL37A,SAP30BP,PTEN,FYN,IDH1,SRPK1,RUNX2,CSTF1,IQGAP1,FBXW7,CEP112,INTS4,LGMN,SMARCD3,HERPUD1,CTNS,SNX17,PXN,KPNB1,SRGAP2,NCOR1,ATP11B,PPP1R10,MEF2A,OXCT1,PARN,FECH,ERAL1,PRKRIP1,COX7A2L,SMEK1,WASH4P,TMEM189,TCTN1,NECAB3,PIAS2,SSBP1,CLSTN2,MAPK8,CLTCL1,MYLK,DDX41,MAN1A2,SRRM2,OSBPL3,PBX3,HLA-F,ABCA2,RAB8A,AFF4,SLC35D2,TRIM28,DENND4C,DMTF1,CSK,CDK5RAP2,COL9A3,PSMC6,TMEM66,RPF2,STX18,TBCD,EMC4,SKIV2L2,DSN1,NSFL1C,WDR61,NUP37,PRPF8,DDHD2,COX14,APPL2,ZNF148,CLTB,FLOT1,WDR13,PSMC4,HNRNPL,KIFC2,STAG2,SP110,GOPC,RANBP9,PPA2,ST6GALNAC5,WDR35,ATPAF2,PAK1,EVC,NCK2,LEPROT,RAB10,RHEB,HNRNPH3,CTSH,VPS45,TCF4,ACD,HMGN2,WDR4,ATP6V0A1,ERC1,TIMM50,OS9,DGKZ,ACTR2,NFYC,P4HB,HSD17B4,ELOVL1,FUT4,SRSF10,TMED3,SS18,SMAD4,GRPEL2,FNTB,KLC1,NAV1,TGFB1I1,SLC35A4,INO80E,DTYMK,SLC39A7,EZR,RPL4,MTRR,CENPT,MBOAT2,ZNF44,AUP1,GOLPH3,ING4,ZNF687,CDC14B,CLK3,DNHD1,NR2C2,FHOD1,FIP1L1,DLST,DNTTIP2,LRPAP1,MRPL49,FLNA,RAB5A,IRF9,CA5B,SUN2,MSL1,HGSNAT,MGAT5,BCS1L,ACTR10,ATP5A1,GLI3,TMED2,ADD3,NDUFV1,MAPK12,NDUFS2,RASGRF2,AK5,GUSB,THOC2,MCOLN1,B4GALT4,ENG,SCFD1,SIRT7,TCF12,PCSK7,ARNT,NOX4,ETFA,EXT1,ERCC1,PHF1,GAA,B3GAT3,SLC25A6,PRELID1,SDHA,PHF12,PDIA5,TBCE,VAMP4,REXO2,MED6,CIRBP,NUP85,IDH3B,HAUS5,RGS2,CLIP2,HINFP,STAM2,NCBP2,MAN2A2,LPCAT1,PDGFRB,COL8A1,EBPL | 1.284165549 | 2.37E-17 |
| GO:0005515 | protein binding | molecular_function | FZD6,CDK14,USP10,CRBN,OBFC1,RAB3GAP2,PBX2,LPP,FAM189B,KANK2,EIF2B4,CADM1,XRN1,CKB,CLMN,IGF1R,LAMB1,NPHP3,PTS,TNRC6A,MYO1D,SIRT2,EPHX2,UTRN,RALGAPA2,BTN3A1,NOC2L,TARS,RAF1,NLRP1,SEPT5,GP1BB,PPP1R13B,GAS8,CDK13,BDNF,METTL9,SIN3B,ATP2B1,SPOP,CPE,CBX5,PLCD1,SART1,COL2A1,CCDC91,SUPT5H,SUPT20H,MARCH5,UBXN1,DPP4,LUC7L,BCL6,TBX2,PTPN22,MMS19,SHMT2,CNTF,EEF2K,VAPB,GPAA1,CUX1,RBM17,CLNS1A,NUP98,EED,FMR1,SMAD7,USP4,BMP8A,HDAC6,GLG1,ARHGEF12,EHMT1,ATP6V1D,VRK2,DYNC1I1,RNH1,ZNF496,HGS,DERL2,IL15RA,CD72,SYTL4,LEF1,GLS,PAX8,SUPT4H1,PSMB9,EMX2,BCL2L11,RBPMS,MEPE,STARD13,STARD9,COG4,NISCH,PAM,NOM1,CEP135,SNRNP70,HSD17B12,DDX23,RAD23A,APITD1,MARK4,UHMK1,USP47,ADAM8,NOL3,CAPZB,GABPB1,PRPF40A,DNAJC10,CD9,PCGF6,RANBP1,SIPA1L1,MARCH6,DDX39A,KRIT1,MINK1,PDLIM5,PTPN6,EEF1A1,ACTR3,VASP,CSNK2A1,IGBP1,UPF3A,NOD1,PRKACA,STAT2,ANAPC4,PPP1R16A,DHX9,PIGS,PLK1,SDCCAG8,VPS52,ASNS,TBC1D2B,COL16A1,NUTF2,JAG2,TTC19,DNM1L,UPF1,HDGF,FDXR,PPP5C,PDXK,NPC1,SHISA5,CCNL1,HERC2,ZC3H12A,NUP210,SEPT4,MIB2,SLC11A2,DIP2A,SYMPK,EFTUD2,FAM58A,RAB24,ATG4B,IL13RA1,LSAMP,TBX18,PCGF1,VAMP7,DR1,BCLAF1,CAMK2D,FYTTD1,JHDM1D,BBS1,JAM2,TBC1D14,PRPF3,TNK2,COL14A1,USP20,GIT2,DCAF11,WAC,STK11IP,STK4,TRO,RARS,ZNF540,SIKE1,TPCN2,VTI1A,FGFR1,HPS4,FBXL8,CFB,PAIP1,USHBP1,GTF3C1,PMS1,ADCY4,CELF1,SNCAIP,PDE4D,AFAP1,TIMM23,PAF1,TAB2,SHARPIN,TCHP,RNF8,CDYL2,SEC31A,MDM2,RHBDD1,SNAP23,FKBP1A,ZFYVE26,PRKCH,PPM1F,TBP,DIS3L,YY1,TLN2,INO80,SSH2,PFDN5,TTC1,CREB1,NPTN,TRAF3IP1,NAGK,FLII,CCNDBP1,DDX58,LCP2,CCNL2,PTPRK,RHBDF1,SERPINH1,LIMCH1,MAGI1,NF1,ZEB1,ACAA1,NEK3,EIF4B,REPS1,SERBP1,NUB1,ATG12,NUMA1,TPM4,RGMB,COL18A1,RTKN,EBF1,MED28,NPR1,ZNF3,RPS6KA5,G3BP1,NIPBL,ALKBH3,MRFAP1L1,BRD9,CAPN10,DCAF8,PKD2,CASP2,STRN4,PPP1R21,RXRB,UBE2Q1,LMNA,NUDT6,MITF,NOL8,ITGA3,RB1,ANKRD44,PRMT5,LTBP4,MAPK8IP3,GNAI1,USP3,PLEKHA2,STX16,MZF1,ZFPM2,TP53BP1,BLOC1S5,NEXN,RNF168,MARK3,PAFAH1B1,SENP2,IL18,RPS19BP1,PUM2,MTCH1,CALCOCO2,TPP1,SYTL2,SUB1,CHMP1A,ARPC2,SYNE1,STK38L,DDX6,ADAM15,SH3BP5,MUM1,USP33,BICD1,GCC2,NR1H3,GARS,CYTH2,GRB10,PLK2,HEXA,USP7,PLD6,FLCN,NRP1,CUL4A,CHFR,TENC1,IGFBP6,DAAM1,SAP30BP,MAST2,STX2,FAP,VPS72,PTEN,FYN,ALDH1A3,IDH1,SRPK1,RUNX2,CSTF1,IQGAP1,C1R,FBXW7,PHPT1,INTS4,SMARCD3,HERPUD1,IKBKB,RQCD1,SNX17,PXN,KPNB1,SRGAP2,COMMD10,LTBR,NCOR1,ATP11B,MEF2A,DYM,OXCT1,PARN,TNS1,FECH,LIFR,PRKRIP1,SETD8,WASH4P,ITGB5,NECAB3,PIAS2,FIBP,SSBP1,VILL,MAPK8,SH3BP2,MYCBP2,CLTCL1,MYLK,USP15,SRRM2,OSBPL3,N6AMT1,RAB8A,ZFAND2B,AFF4,TRIM28,MAP4K4,CSK,CDK5RAP2,CP,PTPRS,PTPRC,PSMC6,TMEM66,STX18,TBCD,RNF146,SKIV2L2,DSN1,CDK6,ABI3BP,AGBL5,RARRES2,WDR61,EBF4,NUP37,PRPF8,APPL2,FARSA,ZNF148,CLTB,FLOT1,PSMC4,HNRNPL,SGSM3,STAG2,UBA2,AAK1,GOPC,RANBP9,IL10RA,ATPAF2,PHKG2,PARD6G,PAK1,NCK2,LEPROT,LEPR,RAB10,RHEB,SEMA6A,MTMR9,CTSH,COMMD4,ZSWIM7,TCF4,ACD,TRPM7,WDR4,SEMA4D,GNB3,CSF1R,ATP6V0A1,ERC1,TIMM50,OS9,DGKZ,ACTR2,C3,NFYC,P4HB,HSD17B4,ELOVL1,RPUSD4,SRSF10,ROBO3,SS18,RCOR3,SMAD4,GRPEL2,FNTB,TBC1D22A,KLC1,C1QTNF3,TGFB1I1,INO80E,SLC4A4,EZR,RPL4,CENPT,CREBZF,GOLPH3,TANK,ING4,USP54,CD276,RBMS1,EIF3M,NR2C2,FHOD1,LRPAP1,MRPL49,YTHDF3,FLNA,RAB5A,IRF9,SUN2,BCAS3,BCS1L,C1S,ATP5A1,GLI3,TMED2,THNSL2,ADD3 | 1.239370893 | 1.73E-16 |
| GO:0005488 | binding | molecular_function | FZD6,CDK14,USP10,CRBN,OBFC1,RSPRY1,RAB3GAP2,PLEKHA3,PBX2,LPP,DHX34,FAM189B,KANK2,CRIP2,ACADVL,EIF2B4,GTF3C2,CADM1,RAI1,XRN1,CKB,CLMN,IGF1R,LAMB1,GK5,NPHP3,PTS,TNRC6A,MYO1D,SIRT2,EPHX2,UTRN,RALGAPA2,MYNN,TRNAU1AP,BTN3A1,NOC2L,TARS,RAF1,NLRP1,ZNF131,SEPT5,GP1BB,LEPRE1,PPP1R13B,GAS8,COL9A1,SFSWAP,CDK13,RBM6,BDNF,METTL9,SIN3B,ATP2B1,SPOP,CPE,CBX5,PLCD1,SART1,COL2A1,CCDC91,RAB34,CALML4,SUPT5H,SUPT20H,ERCC6L2,MARCH5,UBXN1,DPP4,LUC7L,BCL6,FUBP1,ZNF783,CMPK2,TBX2,ENOSF1,PTPN22,MMS19,GBP3,SHMT2,ZFP91,CNTF,EEF2K,PLD1,VAPB,NLN,GPAA1,CUX1,PGS1,RBM17,CLNS1A,NUP98,EED,SLC9B2,FMR1,SMPD4,SMAD7,MCF2L,USP4,BMP8A,PPFIBP2,HDAC6,GLG1,ARHGEF12,EHMT1,ATP6V1D,VRK2,DYNC1I1,RNH1,ZNF496,HGS,TYW1B,DERL2,IL15RA,NARS,LANCL2,H6PD,CD72,SYTL4,DGKA,PNKP,LEF1,GLS,PAX8,SUPT4H1,ZNF83,PSMB9,EMX2,ITGA9,ARHGEF25,ADAMTS1,RGL4,BCL2L11,RBPMS,MEPE,STARD13,ZSCAN31,STARD9,XBP1,COG4,CPM,FDPS,NISCH,PAM,ABCC1,NOM1,CEP135,SNRNP70,HSD17B12,DDX23,RAD23A,METTL3,APITD1,MARK4,UHMK1,USP47,ADAM8,NOL3,CAPZB,GABPB1,PRPF40A,DNAJC10,RNF220,RAB35,XAF1,CD9,PCGF6,RANBP1,SIPA1L1,MARCH6,DDX39A,KRIT1,SKIV2L,MINK1,PDLIM5,RNF24,RHOF,PTPN6,SUGP1,EEF1A1,ACTR3,LHX4,VASP,CMIP,CSNK2A1,IGBP1,UPF3A,NOD1,PRKACA,STAT2,ANAPC4,RPP14,PPP1R16A,DHX9,PIGS,PLK1,SDCCAG8,ZNF446,PNPO,VPS52,LMAN2,PDE7B,ASNS,TBC1D2B,COL16A1,NUTF2,JAG2,TTC19,DNM1L,PTGES2,TNRC18,UPF1,ZNF621,HDGF,FDXR,RC3H1,PPP5C,PDXK,NPC1,SHISA5,CCNL1,RHOBTB1,HERC2,CHD6,ZC3H12A,NUP210,SEPT4,MIB2,POLM,SLC11A2,DIP2A,SYMPK,EFTUD2,AAMP,FAM58A,RAB24,ATG4B,IL13RA1,LSAMP,CNP,TBX18,GCDH,LBX2,PCGF1,VAMP7,DR1,BCLAF1,CAMK2D,FYTTD1,ZNF721,ZNF397,JHDM1D,ZNF710,PLCB4,BBS1,JAM2,DHRSX,DNPEP,TBC1D14,GALK2,PRPF3,TNK2,COL14A1,USP20,GIT2,FLG,DCAF11,WAC,STK11IP,STK4,ZNF142,FUBP3,TRO,MTG1,RARS,ZNF540,SIKE1,ALDH18A1,TPCN2,VTI1A,MAN2C1,FGFR1,HPS4,RAB18,HSF4,FBXL8,CFB,PAIP1,USHBP1,CAPRIN1,GTF3C1,MMP16,NADSYN1,PMS1,ADCY4,CELF1,SNCAIP,PDE4D,AFAP1,RNASET2,SF3A2,TIMM23,PAF1,TAB2,SGK1,PLEKHG4,SHARPIN,DPF2,TCHP,CHKB,NADK,IDI1,RNF8,CDYL2,CYP2R1,SEC31A,MDM2,KCMF1,RHBDD1,SNAP23,FKBP1A,ZCCHC14,ZFYVE26,PRKCH,DAZAP1,PPM1F,ZNF595,TBP,DIS3L,IDH3G,YY1,TLN2,INO80,GMEB2,SSH2,THBS3,MCFD2,PFDN5,TTC1,CREB1,NPTN,TRAF3IP1,SRP9,RALGPS2,NAGK,FLII,PLEKHG5,CCNDBP1,DDX58,ALDH6A1,ZCCHC9,FAM114A2,LCP2,CCNL2,PTPRK,SNX13,RHBDF1,SERPINH1,LIMCH1,MAGI1,SNX21,NF1,ZEB1,ACAA1,NEK3,EIF4B,CRIP1,REPS1,SERBP1,SETBP1,NUB1,ATG12,NUMA1,TPM4,RGMB,COL18A1,RTKN,EBF1,RPL9,MED28,PHF15,FKBP10,UNKL,NPR1,ZNF3,RPS6KA5,G3BP1,NIPBL,RAB31,ALKBH3,MRFAP1L1,BRD9,CAPN10,DCAF8,NTPCR,ZNF837,PKD2,CASP2,STRN4,PPP1R21,HNRNPA3,RXRB,GALT,UBE2Q1,MDP1,LMNA,NUDT6,RSL1D1,MITF,NOL8,PPP2R3C,ITGA3,RB1,ZZEF1,ANKRD44,PRMT5,HMGXB3,LTBP4,MAPK8IP3,RABGGTA,GNAI1,USP3,PLEKHA2,STX16,DHRS1,MZF1,ZFPM2,CPPED1,TP53BP1,BLOC1S5,NEXN,RNF168,MARK3,PAFAH1B1,ZNF865,SENP2,ISYNA1,EDEM2,GPCPD1,IL18,RPS19BP1,PUM2,MTCH1,RNF217,SLFN11,CALCOCO2,STARD3,TPP1,ACBD4,SYTL2,SUB1,CHMP1A,PDE8A,FAM200B,AACS,ARPC2,SYNE1,STK38L,EPN2,DDX6,ACAP2,ZNF558,ANXA5,GALNT2,ADAM15,SH3BP5,MUM1,USP33,ZNF263,ZNF180,BICD1,ZNF276,GCC2,NR1H3,GARS,CYTH2,GRB10,PXDC1,MRPS7,PLK2,PAN2,HEXA,USP7,PLD6,FLCN,NRP1,CUL4A,ZNF605,CHFR,ZNF410,PTGR2,TENC1,FMO2,GMDS,RPL24,IGFBP6,DAAM1,ARHGAP9,RPL37A,SAP30BP,MAST2 | 1.108721986 | 1.23E-15 |
| GO:0044444 | cytoplasmic part | cellular_component | CDK14,USP10,SLC25A37,PLEKHA3,KANK2,CRIP2,ACADVL,EIF2B4,CADM1,PSMB10,XRN1,CKB,AVL9,LAMB1,PTS,TNRC6A,MYO1D,EPHX2,RALGAPA2,RAI14,PPIL2,TARS,RAF1,NLRP1,SEPT5,TSTD1,LEPRE1,GAS8,COL9A1,RSC1A1,BDNF,TAZ,CPE,PLCD1,SART1,COL2A1,CCDC91,RAB34,RILPL1,HLA-DPB1,ST3GAL1,MARCH5,UBXN1,DPP4,CMPK2,ENOSF1,PTPN22,MMS19,SHMT2,EEF2K,PLD1,VAPB,NLN,GPAA1,CUX1,PGS1,CLNS1A,NUP98,SLC9B2,AMT,FMR1,SMPD4,SMAD7,MCF2L,USP4,HDAC6,GLG1,ARHGEF12,ATP6V1D,VRK2,DYNC1I1,HGS,DERL2,IL15RA,NARS,LANCL2,H6PD,SYTL4,DGKA,TTLL3,GLS,HLA-C,PSMB9,ARHGEF25,YIPF1,ADAMTS1,RGL4,BCL2L13,BCL2L11,XYLT1,GLOD4,STARD13,STARD9,COG4,FDPS,NISCH,PAM,ABCC1,CEP135,GLT8D1,HSD17B12,DDX23,HLA-DQA1,AP3S2,APITD1,MPDU1,UHMK1,ADAM8,NOL3,CAPZB,DNAJC10,RAB35,XAF1,CD9,MARCH6,SKIV2L,MINK1,PDLIM5,RNF24,RHOF,PTPN6,EEF1A1,ACTR3,VASP,CSNK2A1,UPF3A,NOD1,PRKACA,STAT2,ANAPC4,RPP14,DHX9,PIGS,PLK1,SDCCAG8,PNPO,VPS52,LMAN2,PDE7B,PREPL,ASNS,COL16A1,ECHDC1,NUTF2,TTC19,DNM1L,PTGES2,UPF1,FDXR,RC3H1,PPP5C,PIGG,PDXK,NPC1,SHISA5,RHOBTB1,HERC2,NUP210,SEPT4,MIB2,SLC11A2,RAB24,CNP,CLN8,PIGN,GCDH,VAMP7,CAMK2D,HLA-DMB,SLC16A1,PLCB4,TBC1D14,TNK2,ENGASE,COL14A1,USP20,FLG,STK4,MTG1,RARS,SIKE1,ALDH18A1,TPCN2,VTI1A,FGFR1,HPS4,PAIP1,CAPRIN1,MMP16,NADSYN1,PDE4D,RNASET2,TIMM23,PAF1,TAB2,SGK1,SHARPIN,TCHP,CPT1B,CHKB,NADK,IDI1,RUSC2,CYP2R1,SEC31A,MDM2,RHBDD1,SNAP23,COL12A1,FKBP1A,PRKCH,PPM1F,DIS3L,IDH3G,FAM13A,GPAT2,THBS3,MCFD2,PFDN5,TTC1,SRP9,TNFRSF25,PLEKHG5,QSOX1,DDX58,ALDH6A1,RPL27,LCP2,SNX13,AP4B1,RHBDF1,SERPINH1,SNX21,ACAA1,EIF4B,SERBP1,IFITM3,EMC3,ATG12,NUMA1,TPM4,RGMB,COL18A1,RPL9,MED28,FKBP10,RPS6KA5,G3BP1,RAB31,ALKBH3,ADSL,ALG6,ST3GAL4,CAPN10,DCAF8,GCNT2,PKD2,CASP2,GALT,UBAC1,LMNA,NUDT6,RSL1D1,GOLGA8B,GOLGA8A,PRMT5,MAPK8IP3,GNAI1,STX16,DHRS1,BLOC1S5,TXNDC5,NEXN,PAFAH1B1,LYRM2,EDEM2,GPCPD1,IL18,PUM2,MTCH1,CALCOCO2,STARD3,TPP1,SYTL2,CHMP1A,PDE8A,AACS,ARPC2,SYNE1,EPN2,DDX6,GALNT2,ADAM15,SH3BP5,USP33,BICD1,RGS3,GCC2,GARS,CCDC115,GRB10,MRPS7,PLK2,PAN2,HEXA,USP7,PLD6,NRP1,FAM172A,FMO2,RPL24,IGFBP6,ARHGAP9,UST,MTMR14,RPL37A,STX2,PTEN,FYN,IDH1,SRPK1,FBXW7,PHPT1,PTP4A2,LGMN,HERPUD1,IKBKB,CTNS,RQCD1,SNX17,GGNBP2,PXN,KPNB1,SRGAP2,ATP11B,DYM,OXCT1,PARN,FECH,ERAL1,COX7A2L,WASH4P,ITGB5,TMEM189,NECAB3,FIBP,SSBP1,CLSTN2,CACNB1,MAPK8,CLTCL1,MYLK,DDX41,MAN1A2,OSBPL3,HLA-F,ABCA2,RAB8A,ZFAND2B,AFF4,SLC35D2,DENND4C,CSK,CDK5RAP2,COL9A3,OAZ1,PSMC6,TMEM66,STX18,IMPDH1,RNF146,EMC4,DSN1,CDK6,NSFL1C,AGBL5,WDR61,NUP37,DDHD2,COX14,APPL2,FARSA,ZNF148,CLTB,FLOT1,PSMC4,ARHGAP29,AAK1,GOPC,RANBP9,PPA2,ST6GALNAC5,WDR35,ATPAF2,PHKG2,PARD6G,PAK1,NCK2,LEPROT,RAB10,RHEB,CTSH,VPS45,ATP6V0A1,ERC1,TIMM50,OS9,P4HB,HSD17B4,ELOVL1,FUT4,PIWIL4,RPUSD4,TMED3,SS18,SMAD4,GRPEL2,FNTB,CHURC1-FNTB,MEMO1,KLC1,SLC35A4,DDAH1,DTYMK,SLC39A7,EZR,RPL4,MTRR,CENPT,MBOAT2,AUP1,GOLPH3,TANK,CDCA3,EIF3M,CLK3,DLST,LRPAP1,MRPL49,FLNA,RAB5A,IRF9,CA5B,SUN2,HGSNAT,MGAT5,BCS1L,ATP5A1,GLI3,TMED2,ADD3,NDUFV1,MAPK12,NDUFS2,RASGRF2,AK5,GUSB,MCOLN1,VEZT,B4GALT4,SCFD1,PCSK7,NOX4,ETFA,EXT1,GAPDH,VTI1B,GAA,MTRF1L,B3GAT3,SLC25A6,PRELID1,SDHA,WWP1,ARHGEF7,PDIA5,TBCE,VAMP4,REXO2,TRAPPC12,CIRBP,NUP85,IDH3B,CTTN,NUBP1,RGS2,CLIP2,STAM2,NCBP2,MAN2A2,LPCAT1,PDGFRB,COL8A1,EBPL,VPS51,TGS1,DZIP1,MAN1B1,NIT1,DIABLO,ENO4 | 1.271175033 | 1.86E-15 |
| GO:0044464 | cell part | cellular_component | FZD6,MARVELD1,CDK14,USP10,RNASEH2B,SLC25A37,CRBN,OBFC1,RAB3GAP2,PLEKHA3,PBX2,LPP,DHX34,KANK2,CRIP2,ACADVL,EIF2B4,GTF3C2,CADM1,RAI1,PSMB10,XRN1,CKB,CLMN,IGF1R,AVL9,LAMB1,NPHP3,PTS,TNRC6A,MYO1D,SIRT2,EPHX2,UTRN,RALGAPA2,MYNN,TRNAU1AP,BTN3A1,RAI14,NOC2L,PPIL2,TARS,RAF1,NLRP1,ZNF131,SEPT5,GP1BB,F11R,TSTD1,LEPRE1,SLC16A3,PPP1R13B,GAS8,COL9A1,RSC1A1,SFSWAP,CDK13,RBM6,BDNF,TAZ,SIN3B,ATP2B1,SPOP,CPE,CBX5,LDLRAD4,PLCD1,SART1,COL2A1,LRRC1,CCDC91,RAB34,SUPT5H,SUPT20H,RILPL1,HLA-DPB1,ST3GAL1,MARCH5,UBXN1,DPP4,PWP1,FBXO32,LUC7L,BCL6,FUBP1,ZNF783,CMPK2,TBX2,ENOSF1,PTPN22,MMS19,GBP3,SHMT2,ZFP91,CNTF,EEF2K,PLD1,VAPB,NLN,GPAA1,CUX1,PGS1,RBM17,CLNS1A,NUP98,EED,SLC9B2,AMT,FMR1,SMPD4,SMAD7,MCF2L,USP4,PPFIBP2,HDAC6,GLG1,ARHGEF12,EHMT1,ATP6V1D,VRK2,DYNC1I1,RNH1,ZNF496,HGS,CASP4,DERL2,IL15RA,NARS,LANCL2,H6PD,CD72,SYTL4,DGKA,TTLL3,ARPC4-TTLL3,PRMT10,PNKP,LEF1,GLS,PAX8,HLA-C,SUPT4H1,ZNF83,PSMB9,EMX2,ITGA9,ARHGEF25,YIPF1,ADAMTS1,RGL4,BCL2L13,BCL2L11,RBPMS,XYLT1,GLOD4,STARD13,ZSCAN31,STARD9,XBP1,COG4,CPM,FDPS,NISCH,PAM,ABCC1,NOM1,CEP135,GLT8D1,SNRNP70,HSD17B12,DDX23,HLA-DQA1,RAD23A,AP3S2,METTL3,APITD1,MPDU1,MARK4,UHMK1,USP47,ADAM8,MAP7D1,NOL3,POLR3E,CAPZB,GABPB1,PRPF40A,DNAJC10,RNF220,RAB35,XAF1,CD9,CDC37L1,PCGF6,RANBP1,SIPA1L1,MARCH6,DDX39A,KRIT1,KPNA6,SKIV2L,MINK1,PDLIM5,RNF24,RHOF,PTPN6,SUGP1,EEF1A1,ACTR3,LHX4,VASP,CMIP,CSNK2A1,IGBP1,UPF3A,NOD1,PRKACA,STAT2,ANAPC4,RPP14,PPP1R16A,DHX9,PIGS,PLK1,APLNR,SDCCAG8,ZNF446,PNPO,VPS52,LMAN2,PDE7B,PREPL,ASNS,TBC1D2B,COL16A1,ECHDC1,NUTF2,JAG2,TTC19,DNM1L,TXNL1,PTGES2,UPF1,ZNF621,HDGF,FDXR,RC3H1,PPP5C,PIGG,PDXK,NPC1,SHISA5,CCNL1,RHOBTB1,HERC2,CHD6,ZC3H12A,NUP210,TBC1D10B,SEPT4,MIB2,POLM,SLC11A2,DIP2A,SYMPK,EFTUD2,AAMP,RAB24,ATG4B,SLC26A6,IL13RA1,LSAMP,CNP,CLN8,TBX18,PIGN,GCDH,LBX2,PCGF1,VAMP7,DR1,BCLAF1,CAMK2D,FYTTD1,ZNF721,HLA-DMB,ZNF397,JHDM1D,SLC16A1,ZNF710,PLCB4,BBS1,JAM2,DNPEP,TBC1D14,GALK2,PRPF3,TNK2,ENGASE,COL14A1,USP20,GIT2,FLG,DCAF11,WAC,STK11IP,STK4,ZNF142,FUBP3,TRO,MTG1,CCDC14,RARS,ZNF540,SIKE1,SLC38A2,ALDH18A1,TPCN2,COPS7B,VTI1A,FGFR1,HPS4,RAB18,HSF4,CFB,DISP1,PAIP1,CAPRIN1,GTF3C1,MMP16,ERH,NADSYN1,PMS1,ADCY4,CELF1,SNCAIP,PDE4D,SLC4A2,AFAP1,RNASET2,SF3A2,TIMM23,PAF1,TAB2,SGK1,PLEKHG4,SLC9A5,SHARPIN,DPF2,TCHP,CPT1B,CHKB,NADK,IDI1,RNF8,CDYL2,RUSC2,KIAA0586,CYP2R1,SEC31A,MDM2,KCMF1,RHBDD1,SNAP23,COL12A1,FKBP1A,ZFYVE26,PRKCH,DAZAP1,ANAPC16,PPM1F,ZNF595,TBP,DIS3L,IDH3G,YY1,FAM13A,TLN2,INO80,GPAT2,GMEB2,SSH2,THBS3,MCFD2,PFDN5,TTC1,CREB1,NPTN,TRAF3IP1,SRP9,RALGPS2,FLII,TNFRSF25,PLEKHG5,QSOX1,RPRD1A,CCNDBP1,DDX58,ALDH6A1,RPL27,LCP2,CCNL2,PTPRK,SNX13,DFNA5,AP4B1,RHBDF1,SERPINH1,MAGI1,SNX21,NF1,ZEB1,PIH1D1,ACAA1,NEK3,EIF4B,CRIP1,REPS1,SERBP1,SETBP1,SPATS2,NUB1,IFITM3,EMC3,ATG12,NUMA1,TPM4,RGMB,COL18A1,RTKN,EBF1,RPL9,MED28,PHF15,FKBP10,UNKL,NPR1,ZNF3,RPS6KA5,G3BP1,NIPBL,RAB31,ALKBH3,ADSL,ALG6,ST3GAL4,CAPN10,DCAF8,GCNT2,ZNF837,PKD2,CASP2,STRN4,SLC12A6,HNRNPA3,RXRB,GALT,UBAC1,LMNA,NUDT6,RSL1D1,MITF,NOL8,PPP2R3C,ITGA3,RB1,GOLGA8B,GOLGA8A,PRMT5,HMGXB3,MAPK8IP3,GNAI1,USP3,PLEKHA2,STX16,DHRS1,MZF1,ZFPM2,TP53BP1,BLOC1S5,TXNDC5,NEXN,RNF168,MARK3,PAFAH1B1,ZNF865,LYRM2,SENP2,ISYNA1,EDEM2,GPCPD1,IL18,RPS19BP1,PUM2,MTCH1,ESAM,SLFN11,CALCOCO2,STARD3,TPP1,SYTL2 | 1.071492369 | 1.59E-13 |
| GO:0005623 | cell | cellular_component | FZD6,MARVELD1,CDK14,USP10,RNASEH2B,SLC25A37,CRBN,OBFC1,RAB3GAP2,PLEKHA3,PBX2,LPP,DHX34,KANK2,CRIP2,ACADVL,EIF2B4,GTF3C2,CADM1,RAI1,PSMB10,XRN1,CKB,CLMN,IGF1R,AVL9,LAMB1,NPHP3,PTS,TNRC6A,MYO1D,SIRT2,EPHX2,UTRN,RALGAPA2,MYNN,TRNAU1AP,BTN3A1,RAI14,NOC2L,PPIL2,TARS,RAF1,NLRP1,ZNF131,SEPT5,GP1BB,F11R,TSTD1,LEPRE1,SLC16A3,PPP1R13B,GAS8,COL9A1,RSC1A1,SFSWAP,CDK13,RBM6,BDNF,TAZ,SIN3B,ATP2B1,SPOP,CPE,CBX5,LDLRAD4,PLCD1,SART1,COL2A1,LRRC1,CCDC91,RAB34,SUPT5H,SUPT20H,RILPL1,HLA-DPB1,ST3GAL1,MARCH5,UBXN1,DPP4,PWP1,FBXO32,LUC7L,BCL6,FUBP1,ZNF783,CMPK2,TBX2,ENOSF1,PTPN22,MMS19,GBP3,SHMT2,ZFP91,CNTF,EEF2K,PLD1,VAPB,NLN,GPAA1,CUX1,PGS1,RBM17,CLNS1A,NUP98,EED,SLC9B2,AMT,FMR1,SMPD4,SMAD7,MCF2L,USP4,PPFIBP2,HDAC6,GLG1,ARHGEF12,EHMT1,ATP6V1D,VRK2,DYNC1I1,RNH1,ZNF496,HGS,CASP4,DERL2,IL15RA,NARS,LANCL2,H6PD,CD72,SYTL4,DGKA,TTLL3,ARPC4-TTLL3,PRMT10,PNKP,LEF1,GLS,PAX8,HLA-C,SUPT4H1,ZNF83,PSMB9,EMX2,ITGA9,ARHGEF25,YIPF1,ADAMTS1,RGL4,BCL2L13,BCL2L11,RBPMS,XYLT1,GLOD4,STARD13,ZSCAN31,STARD9,XBP1,COG4,CPM,FDPS,NISCH,PAM,ABCC1,NOM1,CEP135,GLT8D1,SNRNP70,HSD17B12,DDX23,HLA-DQA1,RAD23A,AP3S2,METTL3,APITD1,MPDU1,MARK4,UHMK1,USP47,ADAM8,MAP7D1,NOL3,POLR3E,CAPZB,GABPB1,PRPF40A,DNAJC10,RNF220,RAB35,XAF1,CD9,CDC37L1,PCGF6,RANBP1,SIPA1L1,MARCH6,DDX39A,KRIT1,KPNA6,SKIV2L,MINK1,PDLIM5,RNF24,RHOF,PTPN6,SUGP1,EEF1A1,ACTR3,LHX4,VASP,CMIP,CSNK2A1,IGBP1,UPF3A,NOD1,PRKACA,STAT2,ANAPC4,RPP14,PPP1R16A,DHX9,PIGS,PLK1,APLNR,SDCCAG8,ZNF446,PNPO,VPS52,LMAN2,PDE7B,PREPL,ASNS,TBC1D2B,COL16A1,ECHDC1,NUTF2,JAG2,TTC19,DNM1L,TXNL1,PTGES2,UPF1,ZNF621,HDGF,FDXR,RC3H1,PPP5C,PIGG,PDXK,NPC1,SHISA5,CCNL1,RHOBTB1,HERC2,CHD6,ZC3H12A,NUP210,TBC1D10B,SEPT4,MIB2,POLM,SLC11A2,DIP2A,SYMPK,EFTUD2,AAMP,RAB24,ATG4B,SLC26A6,IL13RA1,LSAMP,CNP,CLN8,TBX18,PIGN,GCDH,LBX2,PCGF1,VAMP7,DR1,BCLAF1,CAMK2D,FYTTD1,ZNF721,HLA-DMB,ZNF397,JHDM1D,SLC16A1,ZNF710,PLCB4,BBS1,JAM2,DNPEP,TBC1D14,GALK2,PRPF3,TNK2,ENGASE,COL14A1,USP20,GIT2,FLG,DCAF11,WAC,STK11IP,STK4,ZNF142,FUBP3,TRO,MTG1,CCDC14,RARS,ZNF540,SIKE1,SLC38A2,ALDH18A1,TPCN2,COPS7B,VTI1A,FGFR1,HPS4,RAB18,HSF4,CFB,DISP1,PAIP1,CAPRIN1,GTF3C1,MMP16,ERH,NADSYN1,PMS1,ADCY4,CELF1,SNCAIP,PDE4D,SLC4A2,AFAP1,RNASET2,SF3A2,TIMM23,PAF1,TAB2,SGK1,PLEKHG4,SLC9A5,SHARPIN,DPF2,TCHP,CPT1B,CHKB,NADK,IDI1,RNF8,CDYL2,RUSC2,KIAA0586,CYP2R1,SEC31A,MDM2,KCMF1,RHBDD1,SNAP23,COL12A1,FKBP1A,ZFYVE26,PRKCH,DAZAP1,ANAPC16,PPM1F,ZNF595,TBP,DIS3L,IDH3G,YY1,FAM13A,TLN2,INO80,GPAT2,GMEB2,SSH2,THBS3,MCFD2,PFDN5,TTC1,CREB1,NPTN,TRAF3IP1,SRP9,RALGPS2,FLII,TNFRSF25,PLEKHG5,QSOX1,RPRD1A,CCNDBP1,DDX58,ALDH6A1,RPL27,LCP2,CCNL2,PTPRK,SNX13,DFNA5,AP4B1,RHBDF1,SERPINH1,MAGI1,SNX21,NF1,ZEB1,PIH1D1,ACAA1,NEK3,EIF4B,CRIP1,REPS1,SERBP1,SETBP1,SPATS2,NUB1,IFITM3,EMC3,ATG12,NUMA1,TPM4,RGMB,COL18A1,RTKN,EBF1,RPL9,MED28,PHF15,FKBP10,UNKL,NPR1,ZNF3,RPS6KA5,G3BP1,NIPBL,RAB31,ALKBH3,ADSL,ALG6,ST3GAL4,CAPN10,DCAF8,GCNT2,ZNF837,PKD2,CASP2,STRN4,SLC12A6,HNRNPA3,RXRB,GALT,UBAC1,LMNA,NUDT6,RSL1D1,MITF,NOL8,PPP2R3C,ITGA3,RB1,GOLGA8B,GOLGA8A,PRMT5,HMGXB3,MAPK8IP3,GNAI1,USP3,PLEKHA2,STX16,DHRS1,MZF1,ZFPM2,TP53BP1,BLOC1S5,TXNDC5,NEXN,RNF168,MARK3,PAFAH1B1,ZNF865,LYRM2,SENP2,ISYNA1,EDEM2,GPCPD1,IL18,RPS19BP1,PUM2,MTCH1,ESAM,SLFN11,CALCOCO2,STARD3,TPP1,SYTL2 | 1.071419315 | 1.66E-13 |
| GO:0044267 | cellular protein metabolic process | biological_process | CDK14,USP10,CRBN,ACADVL,EIF2B4,PSMB10,IGF1R,TNRC6A,SIRT2,TRNAU1AP,NOC2L,PPIL2,TARS,RAF1,CDK13,SPOP,CPE,ST3GAL1,MARCH5,UBXN1,FBXO32,PTPN22,ZFP91,CNTF,EEF2K,VAPB,GPAA1,EED,FMR1,SMAD7,USP4,HDAC6,EHMT1,VRK2,DERL2,NARS,TTLL3,PRMT10,LEF1,PSMB9,RBPMS,XBP1,PAM,RAD23A,APITD1,MPDU1,MARK4,UHMK1,USP47,ADAM8,DNAJC10,RNF220,MARCH6,MINK1,PTPN6,EEF1A1,CSNK2A1,IGBP1,UPF3A,NOD1,PRKACA,ANAPC4,PIGS,PLK1,ASNS,JAG2,UPF1,HDGF,RC3H1,PPP5C,PIGG,NPC1,CCNL1,HERC2,SEPT4,MIB2,SYMPK,FAM58A,CLN8,PIGN,PCGF1,DR1,CAMK2D,JHDM1D,GIGYF2,TNK2,USP20,DCAF11,WAC,STK4,RARS,ZNF540,COPS7B,FGFR1,HSF4,PAIP1,CAPRIN1,ADCY4,CELF1,TIMM23,PAF1,TAB2,SGK1,SHARPIN,RNF8,SEC31A,MDM2,RHBDD1,FKBP1A,PRKCH,ANAPC16,PPM1F,SSH2,MCFD2,PFDN5,TTC1,CREB1,NPTN,SRP9,QSOX1,RPRD1A,RPL27,CCNL2,PTPRK,RHBDF1,NF1,NEK3,EIF4B,NUB1,SPSB3,RPL9,PHF15,FKBP10,UNKL,NPR1,RPS6KA5,NIPBL,ALG6,ST3GAL4,DCAF8,GCNT2,PKD2,UBE2Q1,MDP1,UBAC1,LMNA,RSL1D1,USP24,RB1,PRMT5,LTBP4,MAPK8IP3,RABGGTA,USP3,RNF168,MARK3,SENP2,EDEM2,PUM2,RNF217,TPP1,STK38L,GALNT2,SH3BP5,USP33,NTMT1,RGS3,NR1H3,GARS,MRPS7,PLK2,PAN2,USP7,FLCN,NRP1,CUL4A,CHFR,RPL24,UST,MTMR14,RPL37A,MAST2,PTEN,FYN,SRPK1,IQGAP1,FBXW7,PHPT1,PTP4A2,HERPUD1,IKBKB,PXN,PTPRF,NCOR1,FECH,PRKRIP1,SETD8,SMEK1,STK19,PIAS2,MAPK8,MYCBP2,MYLK,USP15,MAN1A2,RNF213,N6AMT1,TRIM28,MAP4K4,CSK,PTPRS,PTPRC,PSMC6,TBCD,RNF146,CDK6,AGBL5,WDR61,FARSA,PSMC4,UBA2,AAK1,PPA2,ST6GALNAC5,PHKG2,PAK1,NCK2,TRPM7,SEMA4D,CSF1R,ERC1,TIMM50,OS9,C3,NFYC,P4HB,FUT4,PIWIL4,SMAD4,GRPEL2,FNTB,CHURC1-FNTB,TGFB1I1,ASB8,RPL4,ING4,USP54,CDCA3,EIF3M,CDC14B,CLK3,LRPAP1,MRPL49,MSL1,MGAT5,MAPK12,DCAF6,AK5,B4GALT4,ENG,SIRT7,ARNT,NOX4,EXT1,GAPDH,PHF1,MTRF1L,NRBP2,B3GAT3,SLC25A6,STK36,WWP1,PDIA5,TBCE,MDFI,CIRBP,UBA6,RABGGTB,NAA10,PTPRD,ITGA5,RGS2,NCBP2,MAN2A2,PDGFRB,PTPN4,CDK11A,MAN1B1,CARD14,TNFRSF14,CANX,MKNK2,TRIM41,SMARCA4,NAA16,USP40,YIF1A,RPLP0,SUMF2,PTPN23,CLK4,TLN1,DCAF17,ADRBK2,KLHL7,DNAJC21,GSK3A,SIK3,MRPL3,TTLL11,FBXW2,SETD2,TWF1,KANSL3,PIGO,PDIA3,PRPF4B,IGF2,D2HGDH,ATXN3,AMFR,PSTK,GPHN,PDCD4,CRIPAK,LONP2,PSMA1,CARS2,CSNK1E,CDK5RAP1,NTRK1,SHPRH,SPRED1,TNFRSF10B,PHKG1,ATG3,SMAD9,LMF1,DUSP6,TGFBR3,ZBTB16,BAZ2A,SIRT3,PLOD2,SPCS3,PPT2,EGFL8,EIF3I,VARS,LARS,PHF19,SENP6,PKD1,PDPK1,TSG101,STK24,HEMK1,SSH1,CDK5RAP3,GAK,ALG9,PABPC1,UBR5,FASTK,EYA2,SMARCAD1,WNK1,GATA2 | 1.391894654 | 2.06E-13 |
| GO:0070013 | intracellular organelle lumen | cellular_component | RNASEH2B,CRBN,OBFC1,PBX2,ACADVL,GTF3C2,PSMB10,EPHX2,UTRN,NOC2L,PPIL2,LEPRE1,PPP1R13B,COL9A1,RSC1A1,CDK13,SIN3B,CBX5,SART1,COL2A1,CCDC91,RAB34,SUPT5H,SUPT20H,RILPL1,BCL6,FUBP1,CMPK2,TBX2,MMS19,SHMT2,ZFP91,CUX1,RBM17,NUP98,EED,FMR1,SMAD7,HDAC6,ZNF496,H6PD,SYTL4,PNKP,LEF1,GLS,PAX8,SUPT4H1,PSMB9,XBP1,CPM,FDPS,ABCC1,NOM1,SNRNP70,DDX23,METTL3,APITD1,NOL3,POLR3E,PRPF40A,DNAJC10,SUGP1,CSNK2A1,UPF3A,STAT2,ANAPC4,DHX9,PLK1,COL16A1,HDGF,FDXR,PDXK,CCNL1,ZC3H12A,SEPT4,SYMPK,EFTUD2,GCDH,PCGF1,DR1,BCLAF1,CAMK2D,FYTTD1,JHDM1D,PRPF3,COL14A1,GIT2,WAC,MTG1,RARS,GTF3C1,MMP16,SNCAIP,RNASET2,SF3A2,PAF1,DPF2,MDM2,SNAP23,COL12A1,DAZAP1,TBP,IDH3G,YY1,INO80,GMEB2,CREB1,FLII,RPRD1A,ALDH6A1,CCNL2,SERPINH1,ZEB1,ACAA1,NUMA1,COL18A1,RPL9,MED28,PHF15,FKBP10,ZNF3,RPS6KA5,ALKBH3,HNRNPA3,RXRB,LMNA,RSL1D1,NOL8,RB1,USP3,STX16,ZFPM2,TP53BP1,TXNDC5,PAFAH1B1,SENP2,EDEM2,RPS19BP1,CALCOCO2,TPP1,SUB1,PWP2,CHMP1A,NSA2,SYNE1,STK38L,ZNF263,NTMT1,NR1H3,GARS,HEXA,USP7,CHFR,SAP30BP,PTEN,IDH1,SRPK1,RUNX2,CSTF1,IQGAP1,FBXW7,INTS4,LGMN,SMARCD3,KPNB1,NCOR1,MEF2A,OXCT1,PARN,FECH,ERAL1,PRKRIP1,PIAS2,SSBP1,MAPK8,DDX41,MAN1A2,SRRM2,PBX3,AFF4,TRIM28,DMTF1,COL9A3,PSMC6,RPF2,SKIV2L2,WDR61,PRPF8,APPL2,ZNF148,WDR13,PSMC4,HNRNPL,STAG2,SP110,PPA2,ATPAF2,HNRNPH3,TCF4,ACD,WDR4,ATP6V0A1,TIMM50,OS9,DGKZ,NFYC,P4HB,HSD17B4,SRSF10,SMAD4,GRPEL2,TGFB1I1,INO80E,DTYMK,EZR,RPL4,MTRR,ZNF44,AUP1,ING4,ZNF687,CDC14B,CLK3,NR2C2,FIP1L1,DLST,DNTTIP2,LRPAP1,MRPL49,IRF9,CA5B,SUN2,MSL1,ATP5A1,GLI3,ADD3,MAPK12,GUSB,ENG,SIRT7,TCF12,ARNT,ETFA,ERCC1,PHF1,PRELID1,PHF12,PDIA5,REXO2,MED6,CIRBP,IDH3B,RGS2,HINFP,STAM2,NCBP2,PDGFRB,COL8A1,TGS1,NCAPD3,RAD51B,FAM76B,BDP1,DBF4,CANX,RUNX1,MKNK2,SMARCA4,LMNB1,NAA16,LRPPRC,SUMF2,SDAD1,SNX27,ZNF638,DCAF17,KLHL7,SNRPE,POLG,MRPL3,NCOR2,FPGS,KANSL3,PDIA3,PRPF4B,COL13A1,FTSJ3,NARF,TROVE2,D2HGDH,ATXN3,MAU2,PHF21A,PDCD4,LONP2,PSMA1,STAT6,CARS2,ACIN1,SON,CLIC4,BTBD10,TFAM,PNISR,SPRED1,BRWD1,SMAD9,DUSP6,ZBTB16,BAZ2A,SIRT3,KDELC2,RRP8,PHF19,SEPT2,LUC7L3,CES2,SENP6,PDPK1,TSG101,USF1,FOXC1,KPNA1,ZC3H14,ACAN,STK24,FMOD,PHC2,SMARCAD1,SYCP2L,ZC3H15,GATA2,PABPN1 | 1.410344476 | 1.46E-12 |
| GO:0019538 | protein metabolic process | biological_process | CDK14,USP10,CRBN,ACADVL,EIF2B4,PSMB10,IGF1R,TNRC6A,SIRT2,TRNAU1AP,NOC2L,PPIL2,TARS,RAF1,GP1BB,DDI2,CDK13,SPOP,CPE,COL2A1,ST3GAL1,MARCH5,UBXN1,DPP4,FBXO32,PTPN22,ZFP91,CNTF,EEF2K,VAPB,NLN,GPAA1,EED,FMR1,SMAD7,USP4,HDAC6,GLG1,EHMT1,VRK2,HGS,CASP4,DERL2,NARS,TTLL3,PRMT10,LEF1,PSMB9,ADAMTS1,RBPMS,XYLT1,XBP1,CPM,PAM,RAD23A,SCRN3,APITD1,MPDU1,MARK4,UHMK1,USP47,ADAM8,DNAJC10,RNF220,MARCH6,MINK1,PTPN6,EEF1A1,CSNK2A1,IGBP1,UPF3A,NOD1,PRKACA,ANAPC4,PIGS,PLK1,PREPL,ASNS,JAG2,UPF1,HDGF,RC3H1,PPP5C,PIGG,NPC1,CCNL1,HERC2,SEPT4,MIB2,SYMPK,FAM58A,ATG4B,CLN8,PIGN,PCGF1,DR1,CAMK2D,JHDM1D,GIGYF2,DNPEP,TNK2,USP20,DCAF11,WAC,STK4,RARS,ZNF540,COPS7B,FGFR1,HSF4,C2,CFB,DISP1,PAIP1,CAPRIN1,MMP16,ADCY4,CELF1,TIMM23,PAF1,TAB2,SGK1,SHARPIN,RNF8,SEC31A,MDM2,RHBDD1,FKBP1A,PRKCH,ANAPC16,PPM1F,SSH2,MCFD2,PFDN5,TTC1,CREB1,NPTN,SRP9,QSOX1,RPRD1A,RPL27,CCNL2,PTPRK,RHBDF1,SERPINH1,NF1,NEK3,EIF4B,NUB1,SPSB3,RPL9,PHF15,FKBP10,UNKL,NPR1,RPS6KA5,NIPBL,ALG6,ST3GAL4,CAPN10,DCAF8,GCNT2,PKD2,CASP2,UBE2Q1,MDP1,UBAC1,LMNA,RSL1D1,USP24,RB1,PRMT5,LTBP4,MAPK8IP3,RABGGTA,USP3,RNF168,MARK3,SENP2,EDEM2,IL18,PUM2,RNF217,TPP1,STK38L,GALNT2,ADAM15,SH3BP5,USP33,NTMT1,RGS3,NR1H3,GARS,MRPS7,PLK2,PAN2,HEXA,USP7,FLCN,NRP1,CUL4A,CHFR,RPL24,UST,MTMR14,RPL37A,MAST2,FAP,PTEN,FYN,SRPK1,IQGAP1,C1R,FBXW7,PHPT1,PTP4A2,LGMN,HERPUD1,IFT172,IKBKB,PXN,ADAMTS18,PTPRF,NCOR1,FECH,PRKRIP1,SETD8,SMEK1,STK19,NECAB3,PIAS2,MAPK8,MYCBP2,MYLK,USP15,MAN1A2,RNF213,N6AMT1,TRIM28,MAP4K4,CSK,PTPRS,PTPRC,PSMC6,TBCD,RNF146,CDK6,AGBL5,WDR61,FARSA,PSMC4,SGSM3,UBA2,AAK1,PPA2,ST6GALNAC5,PHKG2,PAK1,NCK2,CTSH,TRPM7,SEMA4D,CSF1R,ERC1,TIMM50,OS9,C3,NFYC,P4HB,FUT4,PIWIL4,SMAD4,GRPEL2,FNTB,CHURC1-FNTB,TGFB1I1,ASB8,RPL4,ING4,USP54,CD276,CDCA3,EIF3M,CDC14B,CLK3,LRPAP1,APOL3,MRPL49,FLNA,IRF9,MSL1,MGAT5,C1S,GLI3,MAPK12,DCAF6,AK5,B4GALT4,ENG,SIRT7,PCSK7,ARNT,NOX4,EXT1,GAPDH,PHF1,MTRF1L,NRBP2,B3GAT3,SLC25A6,STK36,WWP1,PDIA5,TBCE,MDFI,CIRBP,UBA6,RABGGTB,NAA10,PTPRD,ITGA5,RGS2,NCBP2,MAN2A2,LPCAT1,PDGFRB,PTPN4,CDK11A,MAN1B1,CARD14,TNFRSF14,CANX,MKNK2,TRIM41,SMARCA4,NAA16,USP40,YIF1A,RPLP0,SUMF2,PTPN23,RHBDF2,CLK4,TLN1,DCAF17,ADRBK2,KLHL7,DNAJC21,LONRF3,GSK3A,SIK3,MRPL3,TTLL11,FBXW2,SETD2,TWF1,ATG4A,KANSL3,PIGO,PDIA3,PRPF4B,IGF2,D2HGDH,ATXN3,DPP7,AMFR,PSTK,GPHN,PDCD4,CRIPAK,LONP2,PSMA1,CARS2,CSNK1E,CDK5RAP1,NTRK1,SHPRH,SPRED1,TNFRSF10B,PHKG1,ATG3,SMAD9,LMF1,DUSP6,TGFBR3,ZBTB16,STAMBPL1,BAZ2A,SIRT3,PLOD2,SPCS3,PPT2,EGFL8,EIF3I,VARS,LARS,PHF19,SENP6,PKD1,PDPK1,TSG101,ACAN,STK24,HEMK1,SSH1,CDK5RAP3,GAK,C2CD3,ALG9,PABPC1,MMP25,UBR5,FASTK,EYA2,SMARCAD1,WNK1,GATA2 | 1.324708265 | 4.79E-12 |
| GO:0043412 | macromolecule modification | biological_process | CDK14,USP10,CRBN,ACADVL,PSMB10,IGF1R,SIRT2,NOC2L,PPIL2,RAF1,CDK13,SPOP,CPE,ST3GAL1,MARCH5,UBXN1,FBXO32,PTPN22,ZFP91,CNTF,EEF2K,VAPB,GPAA1,EED,SMAD7,USP4,HDAC6,EHMT1,VRK2,TTLL3,PRMT10,LEF1,PSMB9,RBPMS,XBP1,PAM,METTL3,APITD1,MARK4,UHMK1,USP47,ADAM8,DNAJC10,RNF220,MARCH6,MINK1,PTPN6,CSNK2A1,IGBP1,NOD1,PRKACA,ANAPC4,PIGS,PLK1,ASNS,HDGF,RC3H1,PPP5C,PIGG,NPC1,CCNL1,HERC2,SEPT4,MIB2,SYMPK,FAM58A,PIGN,PCGF1,DR1,CAMK2D,JHDM1D,TNK2,USP20,DCAF11,WAC,STK4,COPS7B,FGFR1,HSF4,ADCY4,PAF1,TAB2,SGK1,SHARPIN,RNF8,SEC31A,MDM2,RHBDD1,FKBP1A,PRKCH,ANAPC16,PPM1F,SSH2,MCFD2,CREB1,NPTN,RPRD1A,CCNL2,PTPRK,NF1,NEK3,NUB1,SPSB3,PHF15,FKBP10,UNKL,NPR1,RPS6KA5,NIPBL,ALKBH3,ALG6,ST3GAL4,DCAF8,GCNT2,PKD2,UBE2Q1,MDP1,UBAC1,LMNA,RB1,PRMT5,LTBP4,MAPK8IP3,RABGGTA,USP3,RNF168,MARK3,SENP2,EDEM2,RNF217,TPP1,STK38L,GALNT2,SH3BP5,USP33,NTMT1,RGS3,PLK2,USP7,PLD6,FLCN,NRP1,CUL4A,CHFR,UST,MTMR14,MAST2,PTEN,FYN,SRPK1,IQGAP1,FBXW7,PHPT1,PTP4A2,HERPUD1,IKBKB,PXN,PTPRF,NCOR1,PARN,FECH,PRKRIP1,SETD8,SMEK1,STK19,PIAS2,MAPK8,MYCBP2,MYLK,USP15,MAN1A2,RNF213,N6AMT1,TRIM28,MAP4K4,CSK,PTPRS,PTPRC,PSMC6,RNF146,CDK6,AGBL5,WDR61,PSMC4,UBA2,AAK1,ST6GALNAC5,PHKG2,PAK1,NCK2,TRPM7,WDR4,SEMA4D,CSF1R,ERC1,TIMM50,OS9,C3,P4HB,FUT4,PIWIL4,RPUSD4,SMAD4,FNTB,CHURC1-FNTB,ASB8,ING4,CDCA3,CDC14B,CLK3,MSL1,MGAT5,MAPK12,DCAF6,AK5,B4GALT4,ENG,SIRT7,ARNT,NOX4,EXT1,GAPDH,PHF1,NRBP2,B3GAT3,STK36,WWP1,PDIA5,MDFI,UBA6,RABGGTB,NAA10,PTPRD,ITGA5,RGS2,MAN2A2,PDGFRB,PTPN4,TGS1,CDK11A,MAN1B1,CARD14,TNFRSF14,CANX,MKNK2,TRIM41,SMARCA4,NAA16,YIF1A,SUMF2,PTPN23,CLK4,TLN1,DCAF17,ADRBK2,KLHL7,GSK3A,SIK3,TTLL11,FBXW2,SETD2,TWF1,KANSL3,PIGO,PDIA3,PRPF4B,IGF2,FTSJ3,ATXN3,AMFR,PDCD4,CRIPAK,PSMA1,CSNK1E,CDK5RAP1,NTRK1,SHPRH,SPRED1,TNFRSF10B,PHKG1,ATG3,SMAD9,LMF1,DUSP6,TGFBR3,ZBTB16,BAZ2A,SIRT3,PLOD2,PPT2,EGFL8,PHF19,SENP6,PKD1,PDPK1,TSG101,STK24,HEMK1,SSH1,CDK5RAP3,GAK,MTO1,ALG9,UBR5,FASTK,EYA2,SMARCAD1,WNK1,GATA2 | 1.415038559 | 6.77E-12 |
| GO:0006464 | cellular protein modification process | biological_process | CDK14,USP10,CRBN,ACADVL,PSMB10,IGF1R,SIRT2,NOC2L,PPIL2,RAF1,CDK13,SPOP,CPE,ST3GAL1,MARCH5,UBXN1,FBXO32,PTPN22,ZFP91,CNTF,EEF2K,VAPB,GPAA1,EED,SMAD7,USP4,HDAC6,EHMT1,VRK2,TTLL3,PRMT10,LEF1,PSMB9,RBPMS,XBP1,PAM,APITD1,MARK4,UHMK1,USP47,ADAM8,DNAJC10,RNF220,MARCH6,MINK1,PTPN6,CSNK2A1,IGBP1,NOD1,PRKACA,ANAPC4,PIGS,PLK1,ASNS,HDGF,RC3H1,PPP5C,PIGG,NPC1,CCNL1,HERC2,SEPT4,MIB2,SYMPK,FAM58A,PIGN,PCGF1,DR1,CAMK2D,JHDM1D,TNK2,USP20,DCAF11,WAC,STK4,COPS7B,FGFR1,HSF4,ADCY4,PAF1,TAB2,SGK1,SHARPIN,RNF8,SEC31A,MDM2,RHBDD1,FKBP1A,PRKCH,ANAPC16,PPM1F,SSH2,MCFD2,CREB1,NPTN,RPRD1A,CCNL2,PTPRK,NF1,NEK3,NUB1,SPSB3,PHF15,FKBP10,UNKL,NPR1,RPS6KA5,NIPBL,ALG6,ST3GAL4,DCAF8,GCNT2,PKD2,UBE2Q1,MDP1,UBAC1,LMNA,RB1,PRMT5,LTBP4,MAPK8IP3,RABGGTA,USP3,RNF168,MARK3,SENP2,EDEM2,RNF217,TPP1,STK38L,GALNT2,SH3BP5,USP33,NTMT1,RGS3,PLK2,USP7,FLCN,NRP1,CUL4A,CHFR,UST,MTMR14,MAST2,PTEN,FYN,SRPK1,IQGAP1,FBXW7,PHPT1,PTP4A2,HERPUD1,IKBKB,PXN,PTPRF,NCOR1,FECH,PRKRIP1,SETD8,SMEK1,STK19,PIAS2,MAPK8,MYCBP2,MYLK,USP15,MAN1A2,RNF213,N6AMT1,TRIM28,MAP4K4,CSK,PTPRS,PTPRC,PSMC6,RNF146,CDK6,AGBL5,WDR61,PSMC4,UBA2,AAK1,ST6GALNAC5,PHKG2,PAK1,NCK2,TRPM7,SEMA4D,CSF1R,ERC1,TIMM50,OS9,C3,P4HB,FUT4,SMAD4,FNTB,CHURC1-FNTB,ASB8,ING4,CDCA3,CDC14B,CLK3,MSL1,MGAT5,MAPK12,DCAF6,AK5,B4GALT4,ENG,SIRT7,ARNT,NOX4,EXT1,GAPDH,PHF1,NRBP2,B3GAT3,STK36,WWP1,PDIA5,MDFI,UBA6,RABGGTB,NAA10,PTPRD,ITGA5,RGS2,MAN2A2,PDGFRB,PTPN4,CDK11A,MAN1B1,CARD14,TNFRSF14,CANX,MKNK2,TRIM41,SMARCA4,NAA16,YIF1A,SUMF2,PTPN23,CLK4,TLN1,DCAF17,ADRBK2,KLHL7,GSK3A,SIK3,TTLL11,FBXW2,SETD2,TWF1,KANSL3,PIGO,PDIA3,PRPF4B,IGF2,ATXN3,AMFR,PDCD4,CRIPAK,PSMA1,CSNK1E,CDK5RAP1,NTRK1,SHPRH,SPRED1,TNFRSF10B,PHKG1,ATG3,SMAD9,LMF1,DUSP6,TGFBR3,ZBTB16,BAZ2A,SIRT3,PLOD2,PPT2,EGFL8,PHF19,SENP6,PKD1,PDPK1,TSG101,STK24,HEMK1,SSH1,CDK5RAP3,GAK,ALG9,UBR5,FASTK,EYA2,SMARCAD1,WNK1,GATA2 | 1.425952961 | 6.99E-12 |
| GO:0036211 | protein modification process | biological_process | CDK14,USP10,CRBN,ACADVL,PSMB10,IGF1R,SIRT2,NOC2L,PPIL2,RAF1,CDK13,SPOP,CPE,ST3GAL1,MARCH5,UBXN1,FBXO32,PTPN22,ZFP91,CNTF,EEF2K,VAPB,GPAA1,EED,SMAD7,USP4,HDAC6,EHMT1,VRK2,TTLL3,PRMT10,LEF1,PSMB9,RBPMS,XBP1,PAM,APITD1,MARK4,UHMK1,USP47,ADAM8,DNAJC10,RNF220,MARCH6,MINK1,PTPN6,CSNK2A1,IGBP1,NOD1,PRKACA,ANAPC4,PIGS,PLK1,ASNS,HDGF,RC3H1,PPP5C,PIGG,NPC1,CCNL1,HERC2,SEPT4,MIB2,SYMPK,FAM58A,PIGN,PCGF1,DR1,CAMK2D,JHDM1D,TNK2,USP20,DCAF11,WAC,STK4,COPS7B,FGFR1,HSF4,ADCY4,PAF1,TAB2,SGK1,SHARPIN,RNF8,SEC31A,MDM2,RHBDD1,FKBP1A,PRKCH,ANAPC16,PPM1F,SSH2,MCFD2,CREB1,NPTN,RPRD1A,CCNL2,PTPRK,NF1,NEK3,NUB1,SPSB3,PHF15,FKBP10,UNKL,NPR1,RPS6KA5,NIPBL,ALG6,ST3GAL4,DCAF8,GCNT2,PKD2,UBE2Q1,MDP1,UBAC1,LMNA,RB1,PRMT5,LTBP4,MAPK8IP3,RABGGTA,USP3,RNF168,MARK3,SENP2,EDEM2,RNF217,TPP1,STK38L,GALNT2,SH3BP5,USP33,NTMT1,RGS3,PLK2,USP7,FLCN,NRP1,CUL4A,CHFR,UST,MTMR14,MAST2,PTEN,FYN,SRPK1,IQGAP1,FBXW7,PHPT1,PTP4A2,HERPUD1,IKBKB,PXN,PTPRF,NCOR1,FECH,PRKRIP1,SETD8,SMEK1,STK19,PIAS2,MAPK8,MYCBP2,MYLK,USP15,MAN1A2,RNF213,N6AMT1,TRIM28,MAP4K4,CSK,PTPRS,PTPRC,PSMC6,RNF146,CDK6,AGBL5,WDR61,PSMC4,UBA2,AAK1,ST6GALNAC5,PHKG2,PAK1,NCK2,TRPM7,SEMA4D,CSF1R,ERC1,TIMM50,OS9,C3,P4HB,FUT4,SMAD4,FNTB,CHURC1-FNTB,ASB8,ING4,CDCA3,CDC14B,CLK3,MSL1,MGAT5,MAPK12,DCAF6,AK5,B4GALT4,ENG,SIRT7,ARNT,NOX4,EXT1,GAPDH,PHF1,NRBP2,B3GAT3,STK36,WWP1,PDIA5,MDFI,UBA6,RABGGTB,NAA10,PTPRD,ITGA5,RGS2,MAN2A2,PDGFRB,PTPN4,CDK11A,MAN1B1,CARD14,TNFRSF14,CANX,MKNK2,TRIM41,SMARCA4,NAA16,YIF1A,SUMF2,PTPN23,CLK4,TLN1,DCAF17,ADRBK2,KLHL7,GSK3A,SIK3,TTLL11,FBXW2,SETD2,TWF1,KANSL3,PIGO,PDIA3,PRPF4B,IGF2,ATXN3,AMFR,PDCD4,CRIPAK,PSMA1,CSNK1E,CDK5RAP1,NTRK1,SHPRH,SPRED1,TNFRSF10B,PHKG1,ATG3,SMAD9,LMF1,DUSP6,TGFBR3,ZBTB16,BAZ2A,SIRT3,PLOD2,PPT2,EGFL8,PHF19,SENP6,PKD1,PDPK1,TSG101,STK24,HEMK1,SSH1,CDK5RAP3,GAK,ALG9,UBR5,FASTK,EYA2,SMARCAD1,WNK1,GATA2 | 1.425952961 | 6.99E-12 |
| GO:0031974 | membrane-enclosed lumen | cellular_component | RNASEH2B,CRBN,OBFC1,PBX2,ACADVL,GTF3C2,PSMB10,EPHX2,UTRN,NOC2L,PPIL2,LEPRE1,PPP1R13B,COL9A1,RSC1A1,CDK13,SIN3B,CBX5,SART1,COL2A1,CCDC91,RAB34,SUPT5H,SUPT20H,RILPL1,BCL6,FUBP1,CMPK2,TBX2,MMS19,SHMT2,ZFP91,NLN,CUX1,RBM17,NUP98,EED,FMR1,SMAD7,HDAC6,ZNF496,H6PD,SYTL4,PNKP,LEF1,GLS,PAX8,SUPT4H1,PSMB9,XBP1,CPM,FDPS,ABCC1,NOM1,SNRNP70,DDX23,METTL3,APITD1,NOL3,POLR3E,PRPF40A,DNAJC10,SUGP1,CSNK2A1,UPF3A,STAT2,ANAPC4,DHX9,PLK1,COL16A1,HDGF,FDXR,PDXK,CCNL1,ZC3H12A,SEPT4,SYMPK,EFTUD2,GCDH,PCGF1,DR1,BCLAF1,CAMK2D,FYTTD1,JHDM1D,PRPF3,COL14A1,GIT2,WAC,MTG1,RARS,GTF3C1,MMP16,SNCAIP,RNASET2,SF3A2,TIMM23,PAF1,DPF2,MDM2,SNAP23,COL12A1,DAZAP1,TBP,IDH3G,YY1,INO80,GMEB2,CREB1,FLII,RPRD1A,ALDH6A1,CCNL2,SERPINH1,ZEB1,ACAA1,NUMA1,COL18A1,RPL9,MED28,PHF15,FKBP10,ZNF3,RPS6KA5,ALKBH3,HNRNPA3,RXRB,LMNA,RSL1D1,NOL8,RB1,USP3,STX16,ZFPM2,TP53BP1,TXNDC5,PAFAH1B1,SENP2,EDEM2,RPS19BP1,CALCOCO2,TPP1,SUB1,PWP2,CHMP1A,NSA2,SYNE1,STK38L,ZNF263,NTMT1,NR1H3,GARS,HEXA,USP7,CHFR,SAP30BP,PTEN,IDH1,SRPK1,RUNX2,CSTF1,IQGAP1,FBXW7,INTS4,LGMN,SMARCD3,KPNB1,NCOR1,MEF2A,OXCT1,PARN,FECH,ERAL1,PRKRIP1,PIAS2,SSBP1,MAPK8,DDX41,MAN1A2,SRRM2,PBX3,AFF4,TRIM28,DMTF1,COL9A3,PSMC6,RPF2,SKIV2L2,WDR61,PRPF8,APPL2,ZNF148,WDR13,PSMC4,HNRNPL,STAG2,SP110,PPA2,ATPAF2,HNRNPH3,TCF4,ACD,WDR4,ATP6V0A1,TIMM50,OS9,DGKZ,NFYC,P4HB,HSD17B4,SRSF10,SMAD4,GRPEL2,TGFB1I1,INO80E,DTYMK,EZR,RPL4,MTRR,ZNF44,AUP1,GOLPH3,ING4,ZNF687,CDC14B,CLK3,NR2C2,FIP1L1,DLST,DNTTIP2,LRPAP1,MRPL49,IRF9,CA5B,SUN2,MSL1,ATP5A1,GLI3,ADD3,MAPK12,GUSB,ENG,SIRT7,TCF12,ARNT,ETFA,ERCC1,PHF1,PRELID1,PHF12,PDIA5,REXO2,MED6,CIRBP,IDH3B,RGS2,HINFP,STAM2,NCBP2,PDGFRB,COL8A1,TGS1,NCAPD3,RAD51B,FAM76B,BDP1,DIABLO,DBF4,CANX,RUNX1,MKNK2,SMARCA4,LMNB1,NAA16,LRPPRC,SUMF2,SDAD1,SNX27,ZNF638,DCAF17,KLHL7,SNRPE,POLG,MRPL3,NCOR2,FPGS,KANSL3,PDIA3,PRPF4B,COL13A1,FTSJ3,NARF,TROVE2,D2HGDH,ATXN3,MAU2,PHF21A,PDCD4,LONP2,PSMA1,STAT6,CARS2,ACIN1,SON,CLIC4,BTBD10,TFAM,PNISR,SPRED1,BRWD1,SMAD9,DUSP6,ZBTB16,BAZ2A,SIRT3,KDELC2,RRP8,PHF19,SEPT2,LUC7L3,CES2,SENP6,PDPK1,TSG101,USF1,FOXC1,KPNA1,ZC3H14,ACAN,STK24,FMOD,PHC2,SMARCAD1,SYCP2L,ZC3H15,GATA2,PABPN1 | 1.387802078 | 8.46E-12 |
| GO:0043233 | organelle lumen | cellular_component | RNASEH2B,CRBN,OBFC1,PBX2,ACADVL,GTF3C2,PSMB10,EPHX2,UTRN,NOC2L,PPIL2,LEPRE1,PPP1R13B,COL9A1,RSC1A1,CDK13,SIN3B,CBX5,SART1,COL2A1,CCDC91,RAB34,SUPT5H,SUPT20H,RILPL1,BCL6,FUBP1,CMPK2,TBX2,MMS19,SHMT2,ZFP91,CUX1,RBM17,NUP98,EED,FMR1,SMAD7,HDAC6,ZNF496,H6PD,SYTL4,PNKP,LEF1,GLS,PAX8,SUPT4H1,PSMB9,XBP1,CPM,FDPS,ABCC1,NOM1,SNRNP70,DDX23,METTL3,APITD1,NOL3,POLR3E,PRPF40A,DNAJC10,SUGP1,CSNK2A1,UPF3A,STAT2,ANAPC4,DHX9,PLK1,COL16A1,HDGF,FDXR,PDXK,CCNL1,ZC3H12A,SEPT4,SYMPK,EFTUD2,GCDH,PCGF1,DR1,BCLAF1,CAMK2D,FYTTD1,JHDM1D,PRPF3,COL14A1,GIT2,WAC,MTG1,RARS,GTF3C1,MMP16,SNCAIP,RNASET2,SF3A2,PAF1,DPF2,MDM2,SNAP23,COL12A1,DAZAP1,TBP,IDH3G,YY1,INO80,GMEB2,CREB1,FLII,RPRD1A,ALDH6A1,CCNL2,SERPINH1,ZEB1,ACAA1,NUMA1,COL18A1,RPL9,MED28,PHF15,FKBP10,ZNF3,RPS6KA5,ALKBH3,HNRNPA3,RXRB,LMNA,RSL1D1,NOL8,RB1,USP3,STX16,ZFPM2,TP53BP1,TXNDC5,PAFAH1B1,SENP2,EDEM2,RPS19BP1,CALCOCO2,TPP1,SUB1,PWP2,CHMP1A,NSA2,SYNE1,STK38L,ZNF263,NTMT1,NR1H3,GARS,HEXA,USP7,CHFR,SAP30BP,PTEN,IDH1,SRPK1,RUNX2,CSTF1,IQGAP1,FBXW7,INTS4,LGMN,SMARCD3,KPNB1,NCOR1,MEF2A,OXCT1,PARN,FECH,ERAL1,PRKRIP1,PIAS2,SSBP1,MAPK8,DDX41,MAN1A2,SRRM2,PBX3,AFF4,TRIM28,DMTF1,COL9A3,PSMC6,RPF2,SKIV2L2,WDR61,PRPF8,APPL2,ZNF148,WDR13,PSMC4,HNRNPL,STAG2,SP110,PPA2,ATPAF2,HNRNPH3,TCF4,ACD,WDR4,ATP6V0A1,TIMM50,OS9,DGKZ,NFYC,P4HB,HSD17B4,SRSF10,SMAD4,GRPEL2,TGFB1I1,INO80E,DTYMK,EZR,RPL4,MTRR,ZNF44,AUP1,ING4,ZNF687,CDC14B,CLK3,NR2C2,FIP1L1,DLST,DNTTIP2,LRPAP1,MRPL49,IRF9,CA5B,SUN2,MSL1,ATP5A1,GLI3,ADD3,MAPK12,GUSB,ENG,SIRT7,TCF12,ARNT,ETFA,ERCC1,PHF1,PRELID1,PHF12,PDIA5,REXO2,MED6,CIRBP,IDH3B,RGS2,HINFP,STAM2,NCBP2,PDGFRB,COL8A1,TGS1,NCAPD3,RAD51B,FAM76B,BDP1,DBF4,CANX,RUNX1,MKNK2,SMARCA4,LMNB1,NAA16,LRPPRC,SUMF2,SDAD1,SNX27,ZNF638,DCAF17,KLHL7,SNRPE,POLG,MRPL3,NCOR2,FPGS,KANSL3,PDIA3,PRPF4B,COL13A1,FTSJ3,NARF,TROVE2,D2HGDH,ATXN3,MAU2,PHF21A,PDCD4,LONP2,PSMA1,STAT6,CARS2,ACIN1,SON,CLIC4,BTBD10,TFAM,PNISR,SPRED1,BRWD1,SMAD9,DUSP6,ZBTB16,BAZ2A,SIRT3,KDELC2,RRP8,PHF19,SEPT2,LUC7L3,CES2,SENP6,PDPK1,TSG101,USF1,FOXC1,KPNA1,ZC3H14,ACAN,STK24,FMOD,PHC2,SMARCAD1,SYCP2L,ZC3H15,GATA2,PABPN1 | 1.391393893 | 8.64E-12 |
| GO:0044238 | primary metabolic process | biological_process | FZD6,CDK14,USP10,RNASEH2B,CRBN,OBFC1,RAB3GAP2,PBX2,DHX34,KANK2,ACADVL,EIF2B4,GTF3C2,RAI1,PSMB10,XRN1,CKB,IGF1R,GK5,NPHP3,PTS,TNRC6A,MYO1D,SIRT2,EPHX2,RALGAPA2,MYNN,TRNAU1AP,NOC2L,PPIL2,TARS,RAF1,ZNF131,SEPT5,GP1BB,RSC1A1,DDI2,SFSWAP,CDK13,RBM6,TAZ,SIN3B,ATP2B1,SPOP,CPE,CBX5,PLCD1,SART1,COL2A1,RAB34,SUPT5H,SUPT20H,ST3GAL1,MARCH5,UBXN1,DPP4,PWP1,FBXO32,BCL6,FUBP1,ZNF783,CMPK2,TBX2,ENOSF1,PTPN22,MMS19,GBP3,SPATA20,SHMT2,ZFP91,CNTF,EEF2K,PLD1,VAPB,NLN,GPAA1,CUX1,PGS1,RBM17,CLNS1A,NUP98,EED,AMT,FMR1,SMPD4,SMAD7,MCF2L,USP4,PPFIBP2,HDAC6,GLG1,ARHGEF12,EHMT1,ATP6V1D,VRK2,RNH1,ZNF496,HGS,TYW1B,CASP4,DERL2,NARS,LANCL2,H6PD,TTLL3,PRMT10,PNKP,LEF1,GLS,PAX8,SUPT4H1,ZNF83,PSMB9,EMX2,ARHGEF25,ADAMTS1,RGL4,RBPMS,XYLT1,STARD13,ZSCAN31,XBP1,CPM,FDPS,NISCH,PAM,ABCC1,NOM1,SNRNP70,HSD17B12,DDX23,RAD23A,METTL3,SCRN3,APITD1,MPDU1,MARK4,UHMK1,USP47,ADAM8,NOL3,POLR3E,GABPB1,PRPF40A,DNAJC10,RNF220,RAB35,PCGF6,RANBP1,SIPA1L1,MARCH6,DDX39A,KRIT1,SKIV2L,MINK1,RHOF,PTPN6,SUGP1,EEF1A1,LHX4,CSNK2A1,IGBP1,UPF3A,NOD1,PRKACA,STAT2,ANAPC4,RPP14,DHX9,PIGS,PLK1,ZNF446,PDE7B,PREPL,ASNS,TBC1D2B,JAG2,DNM1L,PTGES2,UPF1,ZNF621,HDGF,FDXR,RC3H1,PPP5C,PIGG,NPC1,CCNL1,HERC2,CHD6,ZC3H12A,NUP210,TBC1D10B,SEPT4,MIB2,POLM,SYMPK,EFTUD2,FAM58A,ATG4B,CNP,CLN8,TBX18,PIGN,GCDH,LBX2,PCGF1,DR1,BCLAF1,CAMK2D,ZNF721,ZNF397,JHDM1D,ZNF710,PLCB4,GIGYF2,DNPEP,TBC1D14,GALK2,PRPF3,TNK2,USP20,GIT2,DCAF11,WAC,STK4,ZNF142,FUBP3,MTG1,RARS,ZNF540,ALDH18A1,COPS7B,MAN2C1,FGFR1,RAB18,HSF4,C2,CFB,DISP1,PAIP1,CAPRIN1,GTF3C1,MMP16,ERH,NADSYN1,PMS1,ADCY4,CELF1,PDE4D,RNASET2,SF3A2,TIMM23,PAF1,TAB2,SGK1,PLEKHG4,SHARPIN,DPF2,CPT1B,CHKB,NADK,IDI1,RNF8,CYP2R1,SEC31A,MDM2,RHBDD1,FKBP1A,ZFYVE26,PRKCH,ANAPC16,PPM1F,ZNF595,TBP,DIS3L,IDH3G,YY1,FAM13A,INO80,GPAT2,GMEB2,SSH2,MCFD2,PFDN5,TTC1,CREB1,NPTN,SRP9,RALGPS2,NAGK,FLII,PLEKHG5,QSOX1,RPRD1A,DDX58,ALDH6A1,RPL27,CCNL2,PTPRK,SNX13,RHBDF1,SERPINH1,NF1,ZEB1,ACAA1,NEK3,EIF4B,NUB1,IFITM3,ASCC2,SPSB3,RGMB,RTKN,EBF1,RPL9,MED28,PHF15,FKBP10,UNKL,NPR1,ZNF3,RPS6KA5,G3BP1,NIPBL,RAB31,ALKBH3,ADSL,ALG6,ST3GAL4,BRD9,CAPN10,DCAF8,GCNT2,ZNF837,PKD2,CASP2,HNRNPA3,RXRB,GALT,UBE2Q1,MDP1,UBAC1,LMNA,RSL1D1,MITF,NOL8,USP24,RB1,PRMT5,LTBP4,MAPK8IP3,RABGGTA,GNAI1,USP3,MZF1,ZFPM2,TP53BP1,RNF168,MARK3,PAFAH1B1,ZNF865,SENP2,ISYNA1,EDEM2,GPCPD1,IL18,PUM2,RNF217,STARD3,TPP1,SUB1,CHMP1A,PDE8A,NSA2,AACS,STK38L,DDX6,ACAP2,ZNF558,GALNT2,ADAM15,SH3BP5,MUM1,USP33,ZNF263,ZNF180,BICD1,NTMT1,ZNF276,RGS3,NR1H3,GARS,CYTH2,GRB10,MRPS7,PLK2,PAN2,HEXA,USP7,PLD6,FLCN,NRP1,CUL4A,ZNF605,CHFR,ZNF410,PTGR2,FMO2,GMDS,RPL24,ARHGAP9,UST,MTMR14,RPL37A,SAP30BP,MAST2,FAP,VPS72,PTEN,FYN,ALDH1A3,IDH1,SRPK1,RNASEK,RUNX2,CSTF1,IQGAP1,C1R,FBXW7,PHPT1,INTS4,PTP4A2,LGMN,SMARCD3,HERPUD1,IFT172,IKBKB,CTNS,RQCD1,SNX17,PXN,ADAMTS18,KPNB1,SRGAP2,RFX7,PTPRF,NCOR1,ATP11B,PPP1R10,MEF2A,OXCT1,PARN,FECH,PRKRIP1,SETD8,SMEK1,STK19,NECAB3,PIAS2,SSBP1,MAPK8,MYCBP2,MYLK,USP15,DDX41,MAN1A2,SRRM2,PBX3,RNF213,N6AMT1,ZNF565,ABCA2,AFF4,TRIM28,DENND4C,DMTF1,MAP4K4,CSK,CDK5RAP2,PTPRS,ITPA,PTPRC,OAZ1,PSMC6,SWAP70,TBCD,IMPDH1,RNF146,UBP1,SKIV2L2,CDK6,AGBL5,RARRES2,WDR61,EBF4,NUP37,PRPF8,DDHD2,FARSA,ZNF148 | 1.137508853 | 1.64E-10 |
| GO:0071704 | organic substance metabolic process | biological_process | FZD6,CDK14,USP10,RNASEH2B,CRBN,OBFC1,RAB3GAP2,PBX2,DHX34,KANK2,ACADVL,EIF2B4,GTF3C2,RAI1,PSMB10,XRN1,CKB,IGF1R,GK5,NPHP3,PTS,TNRC6A,MYO1D,SIRT2,EPHX2,RALGAPA2,MYNN,TRNAU1AP,NOC2L,PPIL2,TARS,RAF1,ZNF131,SEPT5,GP1BB,SLC16A3,RSC1A1,DDI2,SFSWAP,CDK13,RBM6,TAZ,SIN3B,ATP2B1,SPOP,CPE,CBX5,PLCD1,SART1,COL2A1,RAB34,SUPT5H,SUPT20H,ST3GAL1,MARCH5,UBXN1,DPP4,PWP1,FBXO32,BCL6,FUBP1,ZNF783,CMPK2,TBX2,ENOSF1,PTPN22,MMS19,GBP3,SPATA20,SHMT2,ZFP91,CNTF,EEF2K,PLD1,VAPB,NLN,GPAA1,CUX1,PGS1,RBM17,CLNS1A,NUP98,EED,AMT,FMR1,SMPD4,SMAD7,MCF2L,USP4,PPFIBP2,HDAC6,GLG1,ARHGEF12,EHMT1,ATP6V1D,VRK2,RNH1,ZNF496,HGS,TYW1B,CASP4,DERL2,NARS,LANCL2,H6PD,TTLL3,PRMT10,PNKP,LEF1,GLS,PAX8,SUPT4H1,ZNF83,PSMB9,EMX2,ARHGEF25,ADAMTS1,RGL4,RBPMS,XYLT1,STARD13,ZSCAN31,XBP1,CPM,FDPS,NISCH,PAM,ABCC1,NOM1,SNRNP70,HSD17B12,DDX23,RAD23A,METTL3,SCRN3,APITD1,MPDU1,MARK4,UHMK1,USP47,ADAM8,NOL3,POLR3E,GABPB1,PRPF40A,DNAJC10,RNF220,RAB35,PCGF6,RANBP1,SIPA1L1,MARCH6,DDX39A,KRIT1,SKIV2L,MINK1,RHOF,PTPN6,SUGP1,EEF1A1,LHX4,CSNK2A1,IGBP1,UPF3A,NOD1,PRKACA,STAT2,ANAPC4,RPP14,DHX9,PIGS,PLK1,ZNF446,PNPO,PDE7B,PREPL,ASNS,TBC1D2B,JAG2,DNM1L,TXNL1,PTGES2,UPF1,ZNF621,HDGF,FDXR,RC3H1,PPP5C,PIGG,PDXK,NPC1,CCNL1,HERC2,CHD6,ZC3H12A,NUP210,TBC1D10B,SEPT4,MIB2,POLM,SLC11A2,SYMPK,EFTUD2,FAM58A,ATG4B,CNP,CLN8,TBX18,PIGN,GCDH,LBX2,PCGF1,DR1,BCLAF1,CAMK2D,ZNF721,ZNF397,JHDM1D,SLC16A1,ZNF710,PLCB4,GIGYF2,DNPEP,TBC1D14,GALK2,PRPF3,TNK2,USP20,GIT2,DCAF11,WAC,STK4,ZNF142,FUBP3,MTG1,RARS,ZNF540,ALDH18A1,COPS7B,MAN2C1,FGFR1,HPS4,RAB18,HSF4,C2,CFB,DISP1,PAIP1,CAPRIN1,GTF3C1,MMP16,ERH,NADSYN1,PMS1,ADCY4,CELF1,SNCAIP,PDE4D,RNASET2,SF3A2,TIMM23,PAF1,TAB2,SGK1,PLEKHG4,SHARPIN,DPF2,CPT1B,CHKB,NADK,IDI1,RNF8,CYP2R1,SEC31A,MDM2,RHBDD1,FKBP1A,ZFYVE26,PRKCH,ANAPC16,PPM1F,ZNF595,TBP,DIS3L,IDH3G,YY1,FAM13A,INO80,GPAT2,GMEB2,SSH2,MCFD2,PFDN5,TTC1,CREB1,NPTN,SRP9,RALGPS2,NAGK,FLII,PLEKHG5,QSOX1,RPRD1A,DDX58,ALDH6A1,RPL27,CCNL2,PTPRK,SNX13,RHBDF1,SERPINH1,NF1,ZEB1,ACAA1,NEK3,EIF4B,CRIP1,SERBP1,NUB1,IFITM3,ASCC2,SPSB3,RGMB,RTKN,EBF1,RPL9,MED28,PHF15,FKBP10,UNKL,NPR1,ZNF3,RPS6KA5,G3BP1,NIPBL,RAB31,ALKBH3,ADSL,ALG6,ST3GAL4,BRD9,CAPN10,DCAF8,GCNT2,ZNF837,PKD2,CASP2,HNRNPA3,RXRB,GALT,UBE2Q1,MDP1,UBAC1,LMNA,RSL1D1,MITF,NOL8,USP24,RB1,PRMT5,LTBP4,MAPK8IP3,RABGGTA,GNAI1,USP3,MZF1,ZFPM2,TP53BP1,TXNDC5,RNF168,MARK3,PAFAH1B1,ZNF865,SENP2,ISYNA1,EDEM2,GPCPD1,IL18,PUM2,RNF217,STARD3,TPP1,SUB1,CHMP1A,PDE8A,NSA2,AACS,STK38L,DDX6,ACAP2,ZNF558,GALNT2,ADAM15,SH3BP5,MUM1,USP33,ZNF263,ZNF180,BICD1,NTMT1,LYSMD4,ZNF276,RGS3,NR1H3,GARS,CYTH2,GRB10,MRPS7,PLK2,PAN2,HEXA,USP7,PLD6,FLCN,NRP1,CUL4A,ZNF605,CHFR,ZNF410,PTGR2,TENC1,FMO2,GMDS,RPL24,ARHGAP9,UST,MTMR14,RPL37A,SAP30BP,MAST2,FAP,VPS72,PTEN,FYN,ALDH1A3,IDH1,SRPK1,RNASEK,RUNX2,CSTF1,IQGAP1,C1R,FBXW7,PHPT1,INTS4,PTP4A2,LGMN,SMARCD3,HERPUD1,IFT172,IKBKB,CTNS,RQCD1,SNX17,PXN,ADAMTS18,KPNB1,SRGAP2,RFX7,PTPRF,NCOR1,ATP11B,PPP1R10,MEF2A,OXCT1,PARN,FECH,PRKRIP1,SETD8,SMEK1,STK19,NECAB3,PIAS2,SSBP1,MAPK8,MYCBP2,UPK3B,MYLK,USP15,DDX41,MAN1A2,SRRM2,PBX3,RNF213,N6AMT1,ZNF565,ABCA2,AFF4,TRIM28,DENND4C,DMTF1,MAP4K4,CSK,CDK5RAP2,PTPRS,ITPA,PTPRC,OAZ1,PSMC6,SWAP70,TBCD | 1.13045599 | 3.64E-10 |
| GO:0043232 | intracellular non-membrane-bounded organelle | cellular_component | MARVELD1,USP10,RNASEH2B,CRBN,OBFC1,ACADVL,XRN1,TNRC6A,MYO1D,SIRT2,EPHX2,UTRN,RAI14,NOC2L,PPIL2,TARS,SEPT5,SLC16A3,PPP1R13B,GAS8,RSC1A1,SIN3B,CBX5,SART1,CCDC91,RAB34,SUPT5H,RILPL1,BCL6,FUBP1,CMPK2,MMS19,SHMT2,ZFP91,CUX1,RBM17,CLNS1A,NUP98,EED,FMR1,HDAC6,EHMT1,DYNC1I1,LANCL2,SYTL4,TTLL3,ARPC4-TTLL3,PNKP,PAX8,ARHGEF25,BCL2L11,STARD9,CPM,FDPS,ABCC1,NOM1,CEP135,DDX23,APITD1,MARK4,UHMK1,ADAM8,MAP7D1,NOL3,POLR3E,CAPZB,PRPF40A,RANBP1,SIPA1L1,KRIT1,MINK1,PDLIM5,RHOF,SUGP1,ACTR3,VASP,CSNK2A1,UPF3A,PRKACA,DHX9,PLK1,SDCCAG8,NUTF2,TTC19,DNM1L,UPF1,RC3H1,PDXK,HERC2,ZC3H12A,SEPT4,SYMPK,EFTUD2,CNP,PCGF1,BCLAF1,JHDM1D,PLCB4,PRPF3,FLG,MTG1,CCDC14,RARS,CAPRIN1,GTF3C1,SNCAIP,PDE4D,AFAP1,PAF1,SHARPIN,DPF2,TCHP,RNF8,KIAA0586,MDM2,SNAP23,ZFYVE26,DAZAP1,TBP,DIS3L,IDH3G,YY1,TLN2,INO80,GMEB2,SSH2,CREB1,TRAF3IP1,FLII,DDX58,ALDH6A1,RPL27,ZEB1,NUMA1,TPM4,RPL9,MED28,ZNF3,RPS6KA5,G3BP1,PKD2,HNRNPA3,LMNA,RSL1D1,NOL8,PPP2R3C,RB1,GNAI1,USP3,STX16,TP53BP1,NEXN,RNF168,PAFAH1B1,RPS19BP1,PUM2,CALCOCO2,DNALI1,SUB1,PWP2,CHMP1A,NSA2,ARPC2,SYNE1,STK38L,DDX6,ZNF263,BICD1,NTMT1,NR1H3,MRPS7,PLK2,PAN2,NRP1,RPL24,DAAM1,RPL37A,SAP30BP,MAST2,FYN,RUNX2,IQGAP1,FBXW7,CEP112,SMARCD3,RQCD1,PXN,SRGAP2,NCOR1,PPP1R10,MEF2A,PARN,TNS1,PRKRIP1,SETD8,SMEK1,TCTN1,SSBP1,VILL,MYCBP2,CLTCL1,MYLK,DDX41,MAN1A2,SRRM2,ABCA2,RAB8A,AFF4,TRIM28,DMTF1,CSK,CDK5RAP2,PSMC6,RPF2,TBCD,SKIV2L2,DSN1,NSFL1C,WDR61,NUP37,DDHD2,ZNF148,FLOT1,WDR13,PSMC4,KIFC2,STAG2,SP110,GOPC,RANBP9,WDR35,PAK1,EVC,HNRNPH3,ACD,HMGN2,ATP6V0A1,DGKZ,ACTR2,PIWIL4,SS18,SMAD4,FNTB,KLC1,NAV1,TGFB1I1,INO80E,EZR,RPL4,MTRR,CENPT,ZNF44,AUP1,ZNF687,CDC14B,CLK3,DNHD1,NR2C2,FHOD1,FIP1L1,DNTTIP2,MRPL49,FLNA,RAB5A,SUN2,MSL1,ACTR10,GLI3,ADD3,AK5,ENG,SIRT7,GAPDH,ERCC1,PHF1,PRELID1,PHF12,TBCE,REXO2,CIRBP,NUP85,CTTN,HAUS5,RGS2,CLIP2,HINFP,STAM2,NCBP2,PTPN4,DZIP1,NCAPD3,CC2D2A,MYO7B,FARP1,CANX,RUNX1,SMARCA4,LMNB1,LRPPRC,YIF1A,RPLP0,SDAD1,SNX27,KIF13B,PTPN23,ZNF638,TLN1,DCAF17,KLHL7,PHC3,DNAJC21,POLG,MRPL3,NCOR2,TTLL11,SETD2,TWF1,PRPF4B,FTSJ3,NARF,TROVE2,MYO1E,CORO7,DYNC1I2,MAU2,NUCB1,GPHN,PDCD4,PSMA1,STAT6,TANC1,ACIN1,PSD3,SON,CLIC4,NSMCE4A,BNIP2,BTBD10,TFAM,SHPRH,SPRED1,BRWD1,BAZ2A,RRP8,SEPT2,LUC7L3,SENP6,TSG101,THAP6,FOXC1,ZC3H14,SSH1,C2CD3,PABPC1,PHC2,SMARCAD1,CLASP1,CC2D1A,SYCP2L,ZC3H15,GATA2,PABPN1 | 1.315053129 | 1.18E-09 |
| GO:0043228 | non-membrane-bounded organelle | cellular_component | MARVELD1,USP10,RNASEH2B,CRBN,OBFC1,ACADVL,XRN1,TNRC6A,MYO1D,SIRT2,EPHX2,UTRN,RAI14,NOC2L,PPIL2,TARS,SEPT5,SLC16A3,PPP1R13B,GAS8,RSC1A1,SIN3B,CBX5,SART1,CCDC91,RAB34,SUPT5H,RILPL1,BCL6,FUBP1,CMPK2,MMS19,SHMT2,ZFP91,CUX1,RBM17,CLNS1A,NUP98,EED,FMR1,HDAC6,EHMT1,DYNC1I1,LANCL2,SYTL4,TTLL3,ARPC4-TTLL3,PNKP,PAX8,ARHGEF25,BCL2L11,STARD9,CPM,FDPS,ABCC1,NOM1,CEP135,DDX23,APITD1,MARK4,UHMK1,ADAM8,MAP7D1,NOL3,POLR3E,CAPZB,PRPF40A,RANBP1,SIPA1L1,KRIT1,MINK1,PDLIM5,RHOF,SUGP1,ACTR3,VASP,CSNK2A1,UPF3A,PRKACA,DHX9,PLK1,SDCCAG8,NUTF2,TTC19,DNM1L,UPF1,RC3H1,PDXK,HERC2,ZC3H12A,SEPT4,SYMPK,EFTUD2,CNP,PCGF1,BCLAF1,JHDM1D,PLCB4,PRPF3,FLG,MTG1,CCDC14,RARS,CAPRIN1,GTF3C1,SNCAIP,PDE4D,AFAP1,PAF1,SHARPIN,DPF2,TCHP,RNF8,KIAA0586,MDM2,SNAP23,ZFYVE26,DAZAP1,TBP,DIS3L,IDH3G,YY1,TLN2,INO80,GMEB2,SSH2,CREB1,TRAF3IP1,FLII,DDX58,ALDH6A1,RPL27,ZEB1,NUMA1,TPM4,RPL9,MED28,ZNF3,RPS6KA5,G3BP1,PKD2,HNRNPA3,LMNA,RSL1D1,NOL8,PPP2R3C,RB1,GNAI1,USP3,STX16,TP53BP1,NEXN,RNF168,PAFAH1B1,RPS19BP1,PUM2,CALCOCO2,DNALI1,SUB1,PWP2,CHMP1A,NSA2,ARPC2,SYNE1,STK38L,DDX6,ZNF263,BICD1,NTMT1,NR1H3,MRPS7,PLK2,PAN2,NRP1,RPL24,DAAM1,RPL37A,SAP30BP,MAST2,FYN,RUNX2,IQGAP1,FBXW7,CEP112,SMARCD3,RQCD1,PXN,SRGAP2,NCOR1,PPP1R10,MEF2A,PARN,TNS1,PRKRIP1,SETD8,SMEK1,TCTN1,SSBP1,VILL,MYCBP2,CLTCL1,MYLK,DDX41,MAN1A2,SRRM2,ABCA2,RAB8A,AFF4,TRIM28,DMTF1,CSK,CDK5RAP2,PSMC6,RPF2,TBCD,SKIV2L2,DSN1,NSFL1C,WDR61,NUP37,DDHD2,ZNF148,FLOT1,WDR13,PSMC4,KIFC2,STAG2,SP110,GOPC,RANBP9,WDR35,PAK1,EVC,HNRNPH3,ACD,HMGN2,ATP6V0A1,DGKZ,ACTR2,PIWIL4,SS18,SMAD4,FNTB,KLC1,NAV1,TGFB1I1,INO80E,EZR,RPL4,MTRR,CENPT,ZNF44,AUP1,ZNF687,CDC14B,CLK3,DNHD1,NR2C2,FHOD1,FIP1L1,DNTTIP2,MRPL49,FLNA,RAB5A,SUN2,MSL1,ACTR10,GLI3,ADD3,AK5,ENG,SIRT7,GAPDH,ERCC1,PHF1,PRELID1,PHF12,TBCE,REXO2,CIRBP,NUP85,CTTN,HAUS5,RGS2,CLIP2,HINFP,STAM2,NCBP2,PTPN4,DZIP1,NCAPD3,CC2D2A,MYO7B,FARP1,CANX,RUNX1,SMARCA4,LMNB1,LRPPRC,YIF1A,RPLP0,SDAD1,SNX27,KIF13B,PTPN23,ZNF638,TLN1,DCAF17,KLHL7,PHC3,DNAJC21,POLG,MRPL3,NCOR2,TTLL11,SETD2,TWF1,PRPF4B,FTSJ3,NARF,TROVE2,MYO1E,CORO7,DYNC1I2,MAU2,NUCB1,GPHN,PDCD4,PSMA1,STAT6,TANC1,ACIN1,PSD3,SON,CLIC4,NSMCE4A,BNIP2,BTBD10,TFAM,SHPRH,SPRED1,BRWD1,BAZ2A,RRP8,SEPT2,LUC7L3,SENP6,TSG101,THAP6,FOXC1,ZC3H14,SSH1,C2CD3,PABPC1,PHC2,SMARCAD1,CLASP1,CC2D1A,SYCP2L,ZC3H15,GATA2,PABPN1 | 1.315053129 | 1.18E-09 |
| GO:0008152 | metabolic process | biological_process | FZD6,CDK14,USP10,RNASEH2B,CRBN,OBFC1,RAB3GAP2,PBX2,DHX34,KANK2,ACADVL,EIF2B4,GTF3C2,RAI1,PSMB10,XRN1,CKB,IGF1R,GK5,NPHP3,PTS,TNRC6A,MYO1D,SIRT2,EPHX2,RALGAPA2,MYNN,TRNAU1AP,NOC2L,PPIL2,TARS,RAF1,NLRP1,ZNF131,SEPT5,GP1BB,LEPRE1,SLC16A3,RSC1A1,DDI2,SFSWAP,CDK13,RBM6,BDNF,TAZ,SIN3B,ATP2B1,SPOP,CPE,CBX5,PLCD1,SART1,COL2A1,RAB34,SUPT5H,SUPT20H,ERCC6L2,ST3GAL1,MARCH5,UBXN1,DPP4,PWP1,FBXO32,BCL6,FUBP1,ZNF783,CMPK2,TBX2,ENOSF1,PTPN22,MMS19,GBP3,SPATA20,SHMT2,ZFP91,CNTF,EEF2K,PLD1,VAPB,NLN,GPAA1,CUX1,PGS1,PARP6,RBM17,CLNS1A,NUP98,EED,SLC9B2,AMT,FMR1,SMPD4,SMAD7,MCF2L,USP4,PPFIBP2,HDAC6,GLG1,ARHGEF12,EHMT1,ATP6V1D,VRK2,DYNC1I1,RNH1,ZNF496,HGS,TYW1B,CASP4,DERL2,NARS,LANCL2,H6PD,DGKA,TTLL3,PRMT10,PNKP,LEF1,GLS,PAX8,SUPT4H1,ZNF83,PSMB9,EMX2,ARHGEF25,ADAMTS1,RGL4,BCL2L13,BCL2L11,RBPMS,XYLT1,STARD13,ZSCAN31,STARD9,XBP1,CPM,FDPS,NISCH,PAM,ABCC1,NOM1,GLT8D1,SNRNP70,HSD17B12,DDX23,RAD23A,METTL3,SCRN3,APITD1,MPDU1,MARK4,UHMK1,USP47,ADAM8,NOL3,POLR3E,GABPB1,PRPF40A,DNAJC10,RNF220,RAB35,PCGF6,RANBP1,SIPA1L1,MARCH6,DDX39A,KRIT1,SKIV2L,MINK1,RHOF,PTPN6,SUGP1,EEF1A1,LHX4,CSNK2A1,IGBP1,UPF3A,NOD1,PRKACA,STAT2,ANAPC4,RPP14,DHX9,PIGS,PLK1,ZNF446,PNPO,PDE7B,PREPL,ASNS,TBC1D2B,ECHDC1,JAG2,DNM1L,TXNL1,PTGES2,UPF1,ZNF621,HDGF,FDXR,RC3H1,PPP5C,PIGG,PDXK,NPC1,CCNL1,HERC2,CHD6,ZC3H12A,NUP210,TBC1D10B,SEPT4,MIB2,POLM,SLC11A2,DIP2A,SYMPK,EFTUD2,FAM58A,RAB24,ATG4B,CNP,CLN8,TBX18,PIGN,GCDH,LBX2,PCGF1,DR1,BCLAF1,CAMK2D,ZNF721,ZNF397,JHDM1D,SLC16A1,ZNF710,PLCB4,GIGYF2,DHRSX,DNPEP,TBC1D14,GALK2,PRPF3,TNK2,ENGASE,USP20,GIT2,DCAF11,WAC,STK4,ZNF142,FUBP3,MTG1,RARS,ZNF540,ALDH18A1,COPS7B,MAN2C1,FGFR1,HPS4,RAB18,HSF4,C2,CFB,DISP1,PAIP1,CAPRIN1,GTF3C1,MMP16,ERH,NADSYN1,PMS1,ADCY4,CELF1,SNCAIP,PDE4D,RNASET2,SF3A2,TIMM23,PAF1,TAB2,SGK1,PLEKHG4,SHARPIN,DPF2,CPT1B,CHKB,NADK,IDI1,RNF8,CDYL2,CYP2R1,SEC31A,MDM2,KCMF1,RHBDD1,FKBP1A,ZFYVE26,PRKCH,MTMR11,ANAPC16,PPM1F,ZNF595,TBP,DIS3L,IDH3G,YY1,FAM13A,INO80,GPAT2,GMEB2,SSH2,MCFD2,PFDN5,TTC1,CREB1,NPTN,SRP9,RALGPS2,NAGK,FLII,PLEKHG5,QSOX1,RPRD1A,DDX58,ALDH6A1,RPL27,ZCCHC9,CCNL2,PTPRK,SNX13,RHBDF1,SERPINH1,NF1,ZEB1,ACAA1,NEK3,EIF4B,CRIP1,SERBP1,NUB1,IFITM3,ASCC2,ATG12,SPSB3,RGMB,RTKN,EBF1,RPL9,MED28,PHF15,FKBP10,UNKL,NPR1,ZNF3,RPS6KA5,G3BP1,NIPBL,RAB31,ALKBH3,ADSL,ALG6,ST3GAL4,BRD9,CAPN10,DCAF8,GCNT2,NTPCR,ZNF837,PKD2,CASP2,HNRNPA3,RXRB,GALT,UBE2Q1,NEDD8-MDP1,MDP1,UBAC1,LMNA,NUDT6,RSL1D1,MITF,NOL8,USP24,RB1,PRMT5,HMGXB3,LTBP4,MAPK8IP3,RABGGTA,GNAI1,USP3,DHRS1,MZF1,ZFPM2,CPPED1,TP53BP1,TXNDC5,RNF168,MARK3,PAFAH1B1,ZNF865,SENP2,ISYNA1,EDEM2,GPCPD1,IL18,PUM2,MTCH1,RNF217,STARD3,TPP1,SYTL2,DNALI1,SUB1,CHMP1A,PDE8A,NSA2,AACS,STK38L,DDX6,ACAP2,ZNF558,ANXA5,GALNT2,ADAM15,SH3BP5,MUM1,USP33,ZNF263,ZNF180,BICD1,NTMT1,LYSMD4,ZNF276,RGS3,NR1H3,GARS,CYTH2,GRB10,MRPS7,PLK2,PAN2,HEXA,USP7,PLD6,FLCN,NRP1,CUL4A,ZNF605,CHFR,ZNF410,PTGR2,TENC1,FMO2,GMDS,RPL24,ARHGAP9,UST,MTMR14,RPL37A,SAP30BP,MAST2,FAP,VPS72,PTEN,FYN,ALDH1A3,IDH1,SRPK1,RNASEK,RUNX2,CSTF1,IQGAP1,C1R,FBXW7,PHPT1,INTS4,PTP4A2,LGMN,SMARCD3,HERPUD1,IFT172,IKBKB,CTNS,RQCD1,SNX17,PXN,ADAMTS18,KPNB1,SRGAP2,RFX7,PTPRF,NCOR1,ATP11B,PPP1R10,MEF2A,OXCT1,PARN,FECH,PRKRIP1,SETD8 | 1.106275297 | 1.83E-09 |
| GO:0043170 | macromolecule metabolic process | biological_process | FZD6,CDK14,USP10,RNASEH2B,CRBN,OBFC1,PBX2,KANK2,ACADVL,EIF2B4,GTF3C2,RAI1,PSMB10,XRN1,IGF1R,TNRC6A,SIRT2,EPHX2,MYNN,TRNAU1AP,NOC2L,PPIL2,TARS,RAF1,ZNF131,GP1BB,RSC1A1,DDI2,SFSWAP,CDK13,RBM6,SIN3B,SPOP,CPE,CBX5,SART1,COL2A1,SUPT5H,SUPT20H,ST3GAL1,MARCH5,UBXN1,DPP4,PWP1,FBXO32,BCL6,FUBP1,ZNF783,TBX2,PTPN22,MMS19,ZFP91,CNTF,EEF2K,VAPB,NLN,GPAA1,CUX1,RBM17,CLNS1A,NUP98,EED,FMR1,SMAD7,MCF2L,USP4,PPFIBP2,HDAC6,GLG1,EHMT1,VRK2,RNH1,ZNF496,HGS,TYW1B,CASP4,DERL2,NARS,LANCL2,TTLL3,PRMT10,PNKP,LEF1,PAX8,SUPT4H1,ZNF83,PSMB9,EMX2,ADAMTS1,RBPMS,XYLT1,ZSCAN31,XBP1,CPM,PAM,NOM1,SNRNP70,DDX23,RAD23A,METTL3,SCRN3,APITD1,MPDU1,MARK4,UHMK1,USP47,ADAM8,NOL3,POLR3E,GABPB1,PRPF40A,DNAJC10,RNF220,PCGF6,MARCH6,DDX39A,MINK1,PTPN6,SUGP1,EEF1A1,LHX4,CSNK2A1,IGBP1,UPF3A,NOD1,PRKACA,STAT2,ANAPC4,RPP14,DHX9,PIGS,PLK1,ZNF446,PREPL,ASNS,JAG2,PTGES2,UPF1,ZNF621,HDGF,RC3H1,PPP5C,PIGG,NPC1,CCNL1,HERC2,CHD6,ZC3H12A,SEPT4,MIB2,POLM,SYMPK,EFTUD2,FAM58A,ATG4B,CNP,CLN8,TBX18,PIGN,LBX2,PCGF1,DR1,BCLAF1,CAMK2D,ZNF721,ZNF397,JHDM1D,ZNF710,GIGYF2,DNPEP,PRPF3,TNK2,USP20,DCAF11,WAC,STK4,ZNF142,FUBP3,RARS,ZNF540,COPS7B,FGFR1,HPS4,HSF4,C2,CFB,DISP1,PAIP1,CAPRIN1,GTF3C1,MMP16,PMS1,ADCY4,CELF1,RNASET2,SF3A2,TIMM23,PAF1,TAB2,SGK1,SHARPIN,DPF2,RNF8,SEC31A,MDM2,RHBDD1,FKBP1A,ZFYVE26,PRKCH,ANAPC16,PPM1F,ZNF595,TBP,DIS3L,YY1,INO80,GMEB2,SSH2,MCFD2,PFDN5,TTC1,CREB1,NPTN,SRP9,FLII,QSOX1,RPRD1A,DDX58,RPL27,CCNL2,PTPRK,RHBDF1,SERPINH1,NF1,ZEB1,NEK3,EIF4B,CRIP1,SERBP1,NUB1,IFITM3,ASCC2,SPSB3,RGMB,EBF1,RPL9,MED28,PHF15,FKBP10,UNKL,NPR1,ZNF3,RPS6KA5,G3BP1,NIPBL,RAB31,ALKBH3,ALG6,ST3GAL4,BRD9,CAPN10,DCAF8,GCNT2,ZNF837,PKD2,CASP2,HNRNPA3,RXRB,UBE2Q1,MDP1,UBAC1,LMNA,RSL1D1,MITF,NOL8,USP24,RB1,PRMT5,LTBP4,MAPK8IP3,RABGGTA,USP3,MZF1,ZFPM2,TP53BP1,RNF168,MARK3,ZNF865,SENP2,EDEM2,IL18,PUM2,RNF217,TPP1,SUB1,CHMP1A,PDE8A,NSA2,STK38L,DDX6,ZNF558,GALNT2,ADAM15,SH3BP5,MUM1,USP33,ZNF263,ZNF180,BICD1,NTMT1,LYSMD4,ZNF276,RGS3,NR1H3,GARS,GRB10,MRPS7,PLK2,PAN2,HEXA,USP7,PLD6,FLCN,NRP1,CUL4A,ZNF605,CHFR,ZNF410,TENC1,RPL24,UST,MTMR14,RPL37A,SAP30BP,MAST2,FAP,VPS72,PTEN,FYN,SRPK1,RNASEK,RUNX2,CSTF1,IQGAP1,C1R,FBXW7,PHPT1,INTS4,PTP4A2,LGMN,SMARCD3,HERPUD1,IFT172,IKBKB,RQCD1,PXN,ADAMTS18,KPNB1,RFX7,PTPRF,NCOR1,PPP1R10,MEF2A,PARN,FECH,PRKRIP1,SETD8,SMEK1,STK19,NECAB3,PIAS2,SSBP1,MAPK8,MYCBP2,UPK3B,MYLK,USP15,DDX41,MAN1A2,SRRM2,PBX3,RNF213,N6AMT1,ZNF565,ABCA2,AFF4,TRIM28,DMTF1,MAP4K4,CSK,CDK5RAP2,PTPRS,PTPRC,OAZ1,PSMC6,SWAP70,TBCD,RNF146,UBP1,SKIV2L2,CDK6,AGBL5,WDR61,EBF4,PRPF8,FARSA,ZNF148,ZNF76,PSMC4,HNRNPL,SGSM3,STAG2,UBA2,AAK1,SP110,PPA2,ST6GALNAC5,PHKG2,PAK1,NCK2,HNRNPH3,CTSH,ZSWIM7,TCF4,ACD,TRPM7,IKZF5,HMGN2,WDR4,SEMA4D,SSBP2,CSF1R,ERC1,TIMM50,OS9,C3,NFYC,P4HB,FUT4,PIWIL4,RPUSD4,SRSF10,SS18,RCOR3,SMAD4,GRPEL2,FNTB,CHURC1,CHURC1-FNTB,ZNF114,MIER2,C1QTNF3,TGFB1I1,INO80E,ASB8,RPL4,ZNF44,CREBZF,ING4,USP54,CD276,RBMS1,CDCA3,EIF3M,ZNF687,CDC14B,CLK3,NR2C2,FHOD1,FIP1L1,DNTTIP2,LRPAP1,APOL3,MRPL49,FLNA,RAB5A,IRF9,MSL1,HGSNAT,MGAT5,C1S,GLI3,TMED2,MAPK12,CCDC59,DCAF6,AK5,GUSB,THOC2,B4GALT4,ENG,SIRT7,ZSCAN5A,TCF12,PCSK7,ARNT,NOX4,ZNF692,EXT1,GAPDH,ERCC1 | 1.165734336 | 2.54E-09 |
| GO:0044260 | cellular macromolecule metabolic process | biological_process | FZD6,CDK14,USP10,RNASEH2B,CRBN,OBFC1,PBX2,KANK2,ACADVL,EIF2B4,GTF3C2,RAI1,PSMB10,XRN1,IGF1R,TNRC6A,SIRT2,MYNN,TRNAU1AP,NOC2L,PPIL2,TARS,RAF1,ZNF131,RSC1A1,SFSWAP,CDK13,RBM6,SIN3B,SPOP,CPE,CBX5,SART1,COL2A1,SUPT5H,SUPT20H,ST3GAL1,MARCH5,UBXN1,PWP1,FBXO32,BCL6,FUBP1,ZNF783,TBX2,PTPN22,MMS19,ZFP91,CNTF,EEF2K,VAPB,GPAA1,CUX1,RBM17,CLNS1A,NUP98,EED,FMR1,SMAD7,MCF2L,USP4,PPFIBP2,HDAC6,EHMT1,VRK2,RNH1,ZNF496,TYW1B,DERL2,NARS,LANCL2,TTLL3,PRMT10,PNKP,LEF1,PAX8,SUPT4H1,ZNF83,PSMB9,EMX2,RBPMS,XYLT1,ZSCAN31,XBP1,PAM,NOM1,SNRNP70,DDX23,RAD23A,METTL3,APITD1,MPDU1,MARK4,UHMK1,USP47,ADAM8,NOL3,POLR3E,GABPB1,PRPF40A,DNAJC10,RNF220,PCGF6,MARCH6,DDX39A,MINK1,PTPN6,SUGP1,EEF1A1,LHX4,CSNK2A1,IGBP1,UPF3A,NOD1,PRKACA,STAT2,ANAPC4,RPP14,DHX9,PIGS,PLK1,ZNF446,ASNS,JAG2,PTGES2,UPF1,ZNF621,HDGF,RC3H1,PPP5C,PIGG,NPC1,CCNL1,HERC2,CHD6,ZC3H12A,SEPT4,MIB2,POLM,SYMPK,EFTUD2,FAM58A,CNP,CLN8,TBX18,PIGN,LBX2,PCGF1,DR1,BCLAF1,CAMK2D,ZNF721,ZNF397,JHDM1D,ZNF710,GIGYF2,PRPF3,TNK2,USP20,DCAF11,WAC,STK4,ZNF142,FUBP3,RARS,ZNF540,COPS7B,FGFR1,HSF4,PAIP1,CAPRIN1,GTF3C1,PMS1,ADCY4,CELF1,RNASET2,SF3A2,TIMM23,PAF1,TAB2,SGK1,SHARPIN,DPF2,RNF8,SEC31A,MDM2,RHBDD1,FKBP1A,ZFYVE26,PRKCH,ANAPC16,PPM1F,ZNF595,TBP,DIS3L,YY1,INO80,GMEB2,SSH2,MCFD2,PFDN5,TTC1,CREB1,NPTN,SRP9,FLII,QSOX1,RPRD1A,DDX58,RPL27,CCNL2,PTPRK,RHBDF1,NF1,ZEB1,NEK3,EIF4B,NUB1,IFITM3,ASCC2,SPSB3,RGMB,EBF1,RPL9,MED28,PHF15,FKBP10,UNKL,NPR1,ZNF3,RPS6KA5,G3BP1,NIPBL,RAB31,ALKBH3,ALG6,ST3GAL4,BRD9,DCAF8,GCNT2,ZNF837,PKD2,HNRNPA3,RXRB,UBE2Q1,MDP1,UBAC1,LMNA,RSL1D1,MITF,NOL8,USP24,RB1,PRMT5,LTBP4,MAPK8IP3,RABGGTA,USP3,MZF1,ZFPM2,TP53BP1,RNF168,MARK3,ZNF865,SENP2,EDEM2,PUM2,RNF217,TPP1,SUB1,CHMP1A,PDE8A,NSA2,STK38L,DDX6,ZNF558,GALNT2,SH3BP5,MUM1,USP33,ZNF263,ZNF180,BICD1,NTMT1,LYSMD4,ZNF276,RGS3,NR1H3,GARS,GRB10,MRPS7,PLK2,PAN2,HEXA,USP7,PLD6,FLCN,NRP1,CUL4A,ZNF605,CHFR,ZNF410,RPL24,UST,MTMR14,RPL37A,SAP30BP,MAST2,VPS72,PTEN,FYN,SRPK1,RNASEK,RUNX2,CSTF1,IQGAP1,FBXW7,PHPT1,INTS4,PTP4A2,SMARCD3,HERPUD1,IKBKB,RQCD1,PXN,KPNB1,RFX7,PTPRF,NCOR1,PPP1R10,MEF2A,PARN,FECH,PRKRIP1,SETD8,SMEK1,STK19,NECAB3,PIAS2,SSBP1,MAPK8,MYCBP2,MYLK,USP15,DDX41,MAN1A2,SRRM2,PBX3,RNF213,N6AMT1,ZNF565,ABCA2,AFF4,TRIM28,DMTF1,MAP4K4,CSK,CDK5RAP2,PTPRS,PTPRC,PSMC6,SWAP70,TBCD,RNF146,UBP1,SKIV2L2,CDK6,AGBL5,WDR61,EBF4,PRPF8,FARSA,ZNF148,ZNF76,PSMC4,HNRNPL,STAG2,UBA2,AAK1,SP110,PPA2,ST6GALNAC5,PHKG2,PAK1,NCK2,HNRNPH3,ZSWIM7,TCF4,ACD,TRPM7,IKZF5,HMGN2,WDR4,SEMA4D,SSBP2,CSF1R,ERC1,TIMM50,OS9,C3,NFYC,P4HB,FUT4,PIWIL4,RPUSD4,SRSF10,SS18,RCOR3,SMAD4,GRPEL2,FNTB,CHURC1,CHURC1-FNTB,ZNF114,MIER2,TGFB1I1,INO80E,ASB8,RPL4,ZNF44,CREBZF,ING4,USP54,RBMS1,CDCA3,EIF3M,ZNF687,CDC14B,CLK3,NR2C2,FHOD1,FIP1L1,DNTTIP2,LRPAP1,MRPL49,FLNA,RAB5A,IRF9,MSL1,MGAT5,GLI3,MAPK12,CCDC59,DCAF6,AK5,THOC2,B4GALT4,ENG,SIRT7,ZSCAN5A,TCF12,ARNT,NOX4,ZNF692,EXT1,GAPDH,ERCC1,PHF1,GAA,MTRF1L,NRBP2,B3GAT3,SLC25A6,STK36,WWP1,PHF12,PDIA5,TBCE,MED6,MDFI,CIRBP,UBA6,RABGGTB,ZNF554,NAA10,CIZ1,PTPRD,ITGA5,RGS2,HINFP,NCBP2,MAN2A2,MLX,PDGFRB,PTPN4,TGS1,NCAPD3,RAD51B,CDK11A,MAN1B1,GLIS3,ELP6,CARD14,BDP1,TNFRSF14,DBF4,CANX,RUNX1,MKNK2,TRIM41,SMARCA4 | 1.180364332 | 4.54E-09 |
| GO:0044428 | nuclear part | cellular_component | RNASEH2B,CRBN,OBFC1,PBX2,GTF3C2,PSMB10,SIRT2,EPHX2,UTRN,NOC2L,PPIL2,SLC16A3,PPP1R13B,RSC1A1,CDK13,SIN3B,CBX5,SART1,CCDC91,RAB34,SUPT5H,SUPT20H,RILPL1,BCL6,FUBP1,CMPK2,TBX2,MMS19,ZFP91,CUX1,RBM17,NUP98,EED,FMR1,SMAD7,HDAC6,ZNF496,IL15RA,SYTL4,PNKP,LEF1,PAX8,SUPT4H1,PSMB9,XBP1,CPM,FDPS,ABCC1,NOM1,SNRNP70,DDX23,METTL3,APITD1,NOL3,POLR3E,PRPF40A,PCGF6,RANBP1,SUGP1,CSNK2A1,UPF3A,STAT2,ANAPC4,DHX9,PLK1,NUTF2,UPF1,HDGF,PDXK,NPC1,SHISA5,CCNL1,ZC3H12A,NUP210,SEPT4,SYMPK,EFTUD2,PCGF1,DR1,BCLAF1,CAMK2D,FYTTD1,JHDM1D,PRPF3,GIT2,WAC,MTG1,RARS,COPS7B,GTF3C1,PMS1,SNCAIP,SF3A2,PAF1,DPF2,MDM2,SNAP23,DAZAP1,ANAPC16,TBP,IDH3G,YY1,INO80,GMEB2,CREB1,FLII,RPRD1A,ALDH6A1,CCNL2,ZEB1,NUMA1,RPL9,MED28,PHF15,ZNF3,RPS6KA5,NIPBL,ALKBH3,HNRNPA3,RXRB,LMNA,RSL1D1,NOL8,RB1,USP3,STX16,ZFPM2,TP53BP1,PAFAH1B1,SENP2,RPS19BP1,CALCOCO2,SUB1,PWP2,CHMP1A,NSA2,SYNE1,STK38L,ZNF263,NTMT1,NR1H3,USP7,CHFR,SAP30BP,PTEN,SRPK1,RUNX2,CSTF1,IQGAP1,FBXW7,INTS4,SMARCD3,KPNB1,NCOR1,ATP11B,MEF2A,PARN,PRKRIP1,PIAS2,MAPK8,DDX41,MAN1A2,SRRM2,OSBPL3,PBX3,AFF4,TRIM28,DMTF1,PSMC6,RPF2,SKIV2L2,WDR61,NUP37,PRPF8,APPL2,ZNF148,FLOT1,WDR13,PSMC4,HNRNPL,STAG2,SP110,ATPAF2,PAK1,RHEB,HNRNPH3,TCF4,ACD,WDR4,ATP6V0A1,TIMM50,DGKZ,NFYC,SRSF10,SMAD4,TGFB1I1,INO80E,EZR,RPL4,MTRR,ZNF44,AUP1,GOLPH3,ING4,ZNF687,CDC14B,CLK3,NR2C2,FIP1L1,DNTTIP2,IRF9,SUN2,MSL1,ATP5A1,GLI3,ADD3,MAPK12,THOC2,ENG,SIRT7,TCF12,ARNT,ERCC1,PHF1,PRELID1,PHF12,REXO2,MED6,CIRBP,NUP85,RGS2,HINFP,STAM2,NCBP2,TGS1,NCAPD3,RAD51B,GLIS3,FAM76B,BDP1,DBF4,RUNX1,MKNK2,SMARCA4,LMNB1,NAA16,LRPPRC,SDAD1,SNX27,ZNF638,DCAF17,KLHL7,PHC3,SNRPE,NCOR2,KANSL3,PRPF4B,FTSJ3,NARF,WDFY3,TROVE2,ATXN3,MAU2,PHF21A,PDCD4,PSMA1,STAT6,ACIN1,SON,CLIC4,BNIP2,BTBD10,PNISR,SPRED1,BRWD1,SMAD9,DUSP6,ZBTB16,BAZ2A,RRP8,PHF19,SEPT2,LUC7L3,SENP6,PDPK1,TSG101,USF1,FOXC1,KPNA1,ZC3H14,STK24,PABPC1,PHC2,SMARCAD1,SYCP2L,ZC3H15,GATA2,PABPN1 | 1.349955221 | 5.02E-09 |
| GO:0044237 | cellular metabolic process | biological_process | FZD6,CDK14,USP10,RNASEH2B,CRBN,OBFC1,RAB3GAP2,PBX2,DHX34,KANK2,ACADVL,EIF2B4,GTF3C2,RAI1,PSMB10,XRN1,CKB,IGF1R,GK5,PTS,TNRC6A,MYO1D,SIRT2,EPHX2,RALGAPA2,MYNN,TRNAU1AP,NOC2L,PPIL2,TARS,RAF1,ZNF131,SEPT5,SLC16A3,RSC1A1,SFSWAP,CDK13,RBM6,BDNF,TAZ,SIN3B,ATP2B1,SPOP,CPE,CBX5,PLCD1,SART1,COL2A1,RAB34,SUPT5H,SUPT20H,ST3GAL1,MARCH5,UBXN1,PWP1,FBXO32,BCL6,FUBP1,ZNF783,CMPK2,TBX2,ENOSF1,PTPN22,MMS19,GBP3,SHMT2,ZFP91,CNTF,EEF2K,PLD1,VAPB,GPAA1,CUX1,PGS1,RBM17,CLNS1A,NUP98,EED,AMT,FMR1,SMPD4,SMAD7,MCF2L,USP4,PPFIBP2,HDAC6,ARHGEF12,EHMT1,ATP6V1D,VRK2,RNH1,ZNF496,TYW1B,DERL2,NARS,LANCL2,H6PD,DGKA,TTLL3,PRMT10,PNKP,LEF1,GLS,PAX8,SUPT4H1,ZNF83,PSMB9,EMX2,ARHGEF25,RGL4,RBPMS,XYLT1,STARD13,ZSCAN31,XBP1,FDPS,PAM,ABCC1,NOM1,SNRNP70,HSD17B12,DDX23,RAD23A,METTL3,APITD1,MPDU1,MARK4,UHMK1,USP47,ADAM8,NOL3,POLR3E,GABPB1,PRPF40A,DNAJC10,RNF220,RAB35,PCGF6,RANBP1,SIPA1L1,MARCH6,DDX39A,KRIT1,SKIV2L,MINK1,RHOF,PTPN6,SUGP1,EEF1A1,LHX4,CSNK2A1,IGBP1,UPF3A,NOD1,PRKACA,STAT2,ANAPC4,RPP14,DHX9,PIGS,PLK1,ZNF446,PNPO,PDE7B,ASNS,TBC1D2B,JAG2,DNM1L,TXNL1,PTGES2,UPF1,ZNF621,HDGF,FDXR,RC3H1,PPP5C,PIGG,PDXK,NPC1,CCNL1,HERC2,CHD6,ZC3H12A,TBC1D10B,SEPT4,MIB2,POLM,SLC11A2,SYMPK,EFTUD2,FAM58A,RAB24,ATG4B,CNP,CLN8,TBX18,PIGN,GCDH,LBX2,PCGF1,DR1,BCLAF1,CAMK2D,ZNF721,ZNF397,JHDM1D,SLC16A1,ZNF710,GIGYF2,DNPEP,TBC1D14,GALK2,PRPF3,TNK2,USP20,GIT2,DCAF11,WAC,STK4,ZNF142,FUBP3,MTG1,RARS,ZNF540,ALDH18A1,COPS7B,FGFR1,RAB18,HSF4,PAIP1,CAPRIN1,GTF3C1,ERH,NADSYN1,PMS1,ADCY4,CELF1,SNCAIP,PDE4D,RNASET2,SF3A2,TIMM23,PAF1,TAB2,SGK1,PLEKHG4,SHARPIN,DPF2,CPT1B,CHKB,NADK,IDI1,RNF8,CYP2R1,SEC31A,MDM2,RHBDD1,FKBP1A,ZFYVE26,PRKCH,MTMR11,ANAPC16,PPM1F,ZNF595,TBP,DIS3L,IDH3G,YY1,FAM13A,INO80,GPAT2,GMEB2,SSH2,MCFD2,PFDN5,TTC1,CREB1,NPTN,SRP9,RALGPS2,NAGK,FLII,PLEKHG5,QSOX1,RPRD1A,DDX58,ALDH6A1,RPL27,ZCCHC9,CCNL2,PTPRK,SNX13,RHBDF1,NF1,ZEB1,ACAA1,NEK3,EIF4B,NUB1,IFITM3,ASCC2,ATG12,SPSB3,RGMB,RTKN,EBF1,RPL9,MED28,PHF15,FKBP10,UNKL,NPR1,ZNF3,RPS6KA5,G3BP1,NIPBL,RAB31,ALKBH3,ADSL,ALG6,ST3GAL4,BRD9,DCAF8,GCNT2,NTPCR,ZNF837,PKD2,HNRNPA3,RXRB,GALT,UBE2Q1,NEDD8-MDP1,MDP1,UBAC1,LMNA,RSL1D1,MITF,NOL8,USP24,RB1,PRMT5,HMGXB3,LTBP4,MAPK8IP3,RABGGTA,GNAI1,USP3,MZF1,ZFPM2,TP53BP1,RNF168,MARK3,PAFAH1B1,ZNF865,SENP2,ISYNA1,EDEM2,GPCPD1,IL18,PUM2,RNF217,STARD3,TPP1,SYTL2,SUB1,CHMP1A,PDE8A,NSA2,AACS,STK38L,DDX6,ACAP2,ZNF558,GALNT2,SH3BP5,MUM1,USP33,ZNF263,ZNF180,BICD1,NTMT1,LYSMD4,ZNF276,RGS3,NR1H3,GARS,CYTH2,GRB10,MRPS7,PLK2,PAN2,HEXA,USP7,PLD6,FLCN,NRP1,CUL4A,ZNF605,CHFR,ZNF410,PTGR2,TENC1,FMO2,GMDS,RPL24,ARHGAP9,UST,MTMR14,RPL37A,SAP30BP,MAST2,VPS72,PTEN,FYN,ALDH1A3,IDH1,SRPK1,RNASEK,RUNX2,CSTF1,IQGAP1,FBXW7,PHPT1,INTS4,PTP4A2,SMARCD3,HERPUD1,IKBKB,CTNS,RQCD1,PXN,KPNB1,SRGAP2,RFX7,PTPRF,NCOR1,ATP11B,PPP1R10,MEF2A,OXCT1,PARN,FECH,PRKRIP1,SETD8,COX7A2L,SMEK1,STK19,NECAB3,PIAS2,SSBP1,MAPK8,MYCBP2,MYLK,USP15,DDX41,MAN1A2,SRRM2,PBX3,RNF213,N6AMT1,ZNF565,ABCA2,AFF4,TRIM28,DENND4C,DMTF1,MAP4K4,CSK,CDK5RAP2,PTPRS,ITPA,PTPRC,OAZ1,PSMC6,SWAP70,TBCD,IMPDH1,RNF146,UBP1,SKIV2L2,CDK6,AGBL5,RARRES2,WDR61,EBF4,PRPF8,FARSA,ZNF148,ZNF76,PSMC4,HNRNPL,ARHGAP29,SGSM3,STAG2,UBA2,AAK1,SP110,GOPC,PPA2,ST6GALNAC5,PHKG2 | 1.125189992 | 9.16E-09 |
| GO:0031981 | nuclear lumen | cellular_component | RNASEH2B,CRBN,OBFC1,PBX2,GTF3C2,PSMB10,EPHX2,UTRN,NOC2L,PPIL2,PPP1R13B,RSC1A1,CDK13,SIN3B,CBX5,SART1,CCDC91,RAB34,SUPT5H,SUPT20H,RILPL1,BCL6,FUBP1,CMPK2,TBX2,MMS19,ZFP91,CUX1,RBM17,NUP98,EED,FMR1,SMAD7,HDAC6,ZNF496,SYTL4,PNKP,LEF1,PAX8,SUPT4H1,PSMB9,XBP1,CPM,FDPS,ABCC1,NOM1,SNRNP70,DDX23,METTL3,APITD1,NOL3,POLR3E,PRPF40A,SUGP1,CSNK2A1,UPF3A,STAT2,ANAPC4,DHX9,PLK1,HDGF,PDXK,CCNL1,ZC3H12A,SEPT4,SYMPK,EFTUD2,PCGF1,DR1,BCLAF1,CAMK2D,FYTTD1,JHDM1D,PRPF3,GIT2,WAC,MTG1,RARS,GTF3C1,SNCAIP,SF3A2,PAF1,DPF2,MDM2,SNAP23,DAZAP1,TBP,IDH3G,YY1,INO80,GMEB2,CREB1,FLII,RPRD1A,ALDH6A1,CCNL2,ZEB1,NUMA1,RPL9,MED28,PHF15,ZNF3,RPS6KA5,ALKBH3,HNRNPA3,RXRB,LMNA,RSL1D1,NOL8,RB1,USP3,STX16,ZFPM2,TP53BP1,PAFAH1B1,SENP2,RPS19BP1,CALCOCO2,SUB1,PWP2,CHMP1A,NSA2,SYNE1,STK38L,ZNF263,NTMT1,NR1H3,USP7,CHFR,SAP30BP,PTEN,SRPK1,RUNX2,CSTF1,IQGAP1,FBXW7,INTS4,SMARCD3,KPNB1,NCOR1,MEF2A,PARN,PRKRIP1,PIAS2,MAPK8,DDX41,MAN1A2,SRRM2,PBX3,AFF4,TRIM28,DMTF1,PSMC6,RPF2,SKIV2L2,WDR61,PRPF8,APPL2,ZNF148,WDR13,PSMC4,HNRNPL,STAG2,SP110,ATPAF2,HNRNPH3,TCF4,ACD,WDR4,ATP6V0A1,TIMM50,DGKZ,NFYC,SRSF10,SMAD4,TGFB1I1,INO80E,EZR,RPL4,MTRR,ZNF44,AUP1,ING4,ZNF687,CDC14B,CLK3,NR2C2,FIP1L1,DNTTIP2,IRF9,SUN2,MSL1,GLI3,ADD3,MAPK12,ENG,SIRT7,TCF12,ARNT,ERCC1,PHF1,PRELID1,PHF12,REXO2,MED6,CIRBP,RGS2,HINFP,STAM2,NCBP2,TGS1,NCAPD3,RAD51B,FAM76B,BDP1,DBF4,RUNX1,MKNK2,SMARCA4,LMNB1,NAA16,LRPPRC,SDAD1,SNX27,ZNF638,DCAF17,KLHL7,SNRPE,NCOR2,KANSL3,PRPF4B,FTSJ3,NARF,TROVE2,ATXN3,MAU2,PHF21A,PDCD4,PSMA1,STAT6,ACIN1,SON,CLIC4,BTBD10,PNISR,SPRED1,BRWD1,SMAD9,DUSP6,ZBTB16,BAZ2A,RRP8,PHF19,SEPT2,LUC7L3,SENP6,PDPK1,TSG101,USF1,FOXC1,KPNA1,ZC3H14,STK24,PHC2,SMARCAD1,SYCP2L,ZC3H15,GATA2,PABPN1 | 1.369299808 | 9.88E-09 |
| GO:0006793 | phosphorus metabolic process | biological_process | CDK14,CRBN,RAB3GAP2,DHX34,ACADVL,EIF2B4,CKB,IGF1R,GK5,MYO1D,SIRT2,EPHX2,RALGAPA2,RAF1,SEPT5,CDK13,BDNF,TAZ,ATP2B1,PLCD1,RAB34,ST3GAL1,BCL6,CMPK2,PTPN22,GBP3,ZFP91,CNTF,EEF2K,PLD1,VAPB,GPAA1,PGS1,SMPD4,SMAD7,MCF2L,ARHGEF12,ATP6V1D,VRK2,H6PD,DGKA,PNKP,ARHGEF25,RGL4,RBPMS,STARD13,XBP1,FDPS,ABCC1,HSD17B12,DDX23,MARK4,UHMK1,ADAM8,DNAJC10,RAB35,RANBP1,SIPA1L1,DDX39A,KRIT1,SKIV2L,MINK1,RHOF,PTPN6,EEF1A1,CSNK2A1,IGBP1,NOD1,PRKACA,DHX9,PIGS,PLK1,PNPO,PDE7B,ASNS,TBC1D2B,DNM1L,UPF1,HDGF,FDXR,PPP5C,PIGG,PDXK,CCNL1,HERC2,CHD6,TBC1D10B,SEPT4,SYMPK,EFTUD2,FAM58A,CNP,CLN8,PIGN,GCDH,CAMK2D,TBC1D14,GALK2,TNK2,GIT2,STK4,MTG1,ALDH18A1,FGFR1,RAB18,NADSYN1,PMS1,ADCY4,PDE4D,TAB2,SGK1,PLEKHG4,CHKB,NADK,IDI1,SEC31A,FKBP1A,PRKCH,MTMR11,PPM1F,FAM13A,INO80,GPAT2,SSH2,CREB1,NPTN,RALGPS2,NAGK,PLEKHG5,RPRD1A,DDX58,ZCCHC9,CCNL2,PTPRK,SNX13,NF1,NEK3,RTKN,NPR1,RPS6KA5,G3BP1,RAB31,ADSL,NTPCR,PKD2,GALT,NEDD8-MDP1,MDP1,LMNA,RB1,HMGXB3,LTBP4,MAPK8IP3,GNAI1,MARK3,PAFAH1B1,SENP2,ISYNA1,GPCPD1,TPP1,SYTL2,PDE8A,STK38L,DDX6,ACAP2,SH3BP5,RGS3,GARS,CYTH2,GRB10,PLK2,HEXA,PLD6,FLCN,NRP1,TENC1,FMO2,GMDS,ARHGAP9,MTMR14,MAST2,PTEN,FYN,IDH1,SRPK1,IQGAP1,FBXW7,PHPT1,PTP4A2,HERPUD1,IKBKB,CTNS,PXN,SRGAP2,PTPRF,ATP11B,PPP1R10,MEF2A,FECH,PRKRIP1,SMEK1,STK19,MAPK8,MYLK,USP15,DDX41,RNF213,ABCA2,TRIM28,DENND4C,MAP4K4,CSK,PTPRS,ITPA,PTPRC,PSMC6,TBCD,IMPDH1,SKIV2L2,CDK6,PSMC4,ARHGAP29,SGSM3,AAK1,GOPC,PPA2,PHKG2,PAK1,NCK2,RHEB,MTMR9,TRPM7,SEMA4D,GNB3,CSF1R,ERC1,TIMM50,DGKZ,C3,HSD17B4,ELOVL1,SMAD4,GRPEL2,TBC1D22A,DTYMK,MBOAT2,CDC14B,CLK3,DLST,RAB5A,ATP5A1,TMED2,THNSL2,NDUFV1,MAPK12,NDUFS2,RASGRF2,AK5,ENG,NOX4,NRBP2,STK36,ATP8B2,ARHGEF7,PDIA5,ASAP1,REXO2,MDFI,IDH3B,PTPRD,ITGA5,RGS2,LPCAT1,PDGFRB,PTPN4,RAD51B,CDK11A,CARD14,FARP1,TNFRSF14,RAP1B,MKNK2,SMARCA4,YIF1A,DHX40,ACYP2,PTPN23,CLK4,TLN1,DOCK8,ADRBK2,LONRF3,GSK3A,SIK3,TWF1,PCYT1A,PIGO,PPAP2A,PRPF4B,IGF2,MYO1E,PSTK,GPHN,PDCD4,PGM2,RGL2,CHD2,CRIPAK,LONP2,ACIN1,PSD3,CSNK1E,CDK5RAP1,BNIP2,NTRK1,SPRED1,TNFRSF10B,PHKG1,SMAD9,DUSP6,TGFBR3,UCK1,DHX37,UQCRH,PKD1,PDPK1,STK24,SSH1,CDK5RAP3,RAPGEF6,GAK,ALG9,RBKS,PANK3,FASTK,EYA2,SMARCAD1,WNK1,DENND6B,PLA2G16 | 1.302814291 | 1.15E-08 |
| GO:0006796 | phosphate-containing compound metabolic process | biological_process | CDK14,CRBN,RAB3GAP2,DHX34,ACADVL,EIF2B4,CKB,IGF1R,GK5,MYO1D,SIRT2,EPHX2,RALGAPA2,RAF1,SEPT5,CDK13,BDNF,TAZ,ATP2B1,PLCD1,RAB34,ST3GAL1,BCL6,CMPK2,PTPN22,GBP3,ZFP91,CNTF,EEF2K,PLD1,VAPB,GPAA1,PGS1,SMPD4,SMAD7,MCF2L,ARHGEF12,ATP6V1D,VRK2,H6PD,DGKA,PNKP,ARHGEF25,RGL4,RBPMS,STARD13,XBP1,FDPS,ABCC1,DDX23,MARK4,UHMK1,ADAM8,DNAJC10,RAB35,RANBP1,SIPA1L1,DDX39A,KRIT1,SKIV2L,MINK1,RHOF,PTPN6,EEF1A1,CSNK2A1,IGBP1,NOD1,PRKACA,DHX9,PIGS,PLK1,PNPO,PDE7B,ASNS,TBC1D2B,DNM1L,UPF1,HDGF,FDXR,PPP5C,PIGG,PDXK,CCNL1,HERC2,CHD6,TBC1D10B,SEPT4,SYMPK,EFTUD2,FAM58A,CNP,CLN8,PIGN,CAMK2D,TBC1D14,GALK2,TNK2,GIT2,STK4,MTG1,ALDH18A1,FGFR1,RAB18,NADSYN1,PMS1,ADCY4,PDE4D,TAB2,SGK1,PLEKHG4,CHKB,NADK,IDI1,SEC31A,FKBP1A,PRKCH,MTMR11,PPM1F,FAM13A,INO80,GPAT2,SSH2,CREB1,NPTN,RALGPS2,NAGK,PLEKHG5,RPRD1A,DDX58,ZCCHC9,CCNL2,PTPRK,SNX13,NF1,NEK3,RTKN,NPR1,RPS6KA5,G3BP1,RAB31,ADSL,NTPCR,PKD2,GALT,NEDD8-MDP1,MDP1,LMNA,RB1,HMGXB3,LTBP4,MAPK8IP3,GNAI1,MARK3,PAFAH1B1,SENP2,ISYNA1,GPCPD1,TPP1,SYTL2,PDE8A,STK38L,DDX6,ACAP2,SH3BP5,RGS3,GARS,CYTH2,GRB10,PLK2,HEXA,PLD6,FLCN,NRP1,TENC1,FMO2,GMDS,ARHGAP9,MTMR14,MAST2,PTEN,FYN,IDH1,SRPK1,IQGAP1,FBXW7,PHPT1,PTP4A2,HERPUD1,IKBKB,CTNS,PXN,SRGAP2,PTPRF,ATP11B,PPP1R10,MEF2A,FECH,PRKRIP1,SMEK1,STK19,MAPK8,MYLK,USP15,DDX41,RNF213,ABCA2,TRIM28,DENND4C,MAP4K4,CSK,PTPRS,ITPA,PTPRC,PSMC6,TBCD,IMPDH1,SKIV2L2,CDK6,PSMC4,ARHGAP29,SGSM3,AAK1,GOPC,PPA2,PHKG2,PAK1,NCK2,RHEB,MTMR9,TRPM7,SEMA4D,GNB3,CSF1R,ERC1,TIMM50,DGKZ,C3,SMAD4,GRPEL2,TBC1D22A,DTYMK,MBOAT2,CDC14B,CLK3,RAB5A,ATP5A1,TMED2,THNSL2,NDUFV1,MAPK12,NDUFS2,RASGRF2,AK5,ENG,NOX4,NRBP2,STK36,ATP8B2,ARHGEF7,PDIA5,ASAP1,REXO2,MDFI,IDH3B,PTPRD,ITGA5,RGS2,LPCAT1,PDGFRB,PTPN4,RAD51B,CDK11A,CARD14,FARP1,TNFRSF14,RAP1B,MKNK2,SMARCA4,YIF1A,DHX40,ACYP2,PTPN23,CLK4,TLN1,DOCK8,ADRBK2,LONRF3,GSK3A,SIK3,TWF1,PCYT1A,PIGO,PPAP2A,PRPF4B,IGF2,MYO1E,PSTK,GPHN,PDCD4,PGM2,RGL2,CHD2,CRIPAK,LONP2,ACIN1,PSD3,CSNK1E,CDK5RAP1,BNIP2,NTRK1,SPRED1,TNFRSF10B,PHKG1,SMAD9,DUSP6,TGFBR3,UCK1,DHX37,UQCRH,PKD1,PDPK1,STK24,SSH1,CDK5RAP3,RAPGEF6,GAK,ALG9,RBKS,PANK3,FASTK,EYA2,SMARCAD1,WNK1,DENND6B,PLA2G16 | 1.300297288 | 1.95E-08 |
| GO:0005634 | nucleus | cellular_component | MARVELD1,CDK14,USP10,RNASEH2B,CRBN,OBFC1,PBX2,LPP,GTF3C2,RAI1,PSMB10,SIRT2,EPHX2,UTRN,RALGAPA2,MYNN,TRNAU1AP,RAI14,NOC2L,PPIL2,RAF1,NLRP1,ZNF131,LEPRE1,SLC16A3,PPP1R13B,RSC1A1,SFSWAP,CDK13,RBM6,SIN3B,SPOP,CPE,CBX5,SART1,CCDC91,RAB34,SUPT5H,SUPT20H,RILPL1,UBXN1,PWP1,FBXO32,LUC7L,BCL6,FUBP1,ZNF783,CMPK2,TBX2,PTPN22,MMS19,ZFP91,CUX1,RBM17,CLNS1A,NUP98,EED,FMR1,SMAD7,USP4,HDAC6,EHMT1,VRK2,ZNF496,IL15RA,LANCL2,SYTL4,PNKP,LEF1,PAX8,SUPT4H1,ZNF83,PSMB9,EMX2,BCL2L13,RBPMS,ZSCAN31,STARD9,XBP1,CPM,FDPS,ABCC1,NOM1,SNRNP70,DDX23,RAD23A,METTL3,APITD1,UHMK1,NOL3,POLR3E,GABPB1,PRPF40A,XAF1,PCGF6,RANBP1,DDX39A,KPNA6,SKIV2L,PTPN6,SUGP1,EEF1A1,LHX4,CMIP,CSNK2A1,UPF3A,PRKACA,STAT2,ANAPC4,RPP14,DHX9,PLK1,ZNF446,NUTF2,TXNL1,PTGES2,UPF1,ZNF621,HDGF,PPP5C,PDXK,NPC1,SHISA5,CCNL1,HERC2,CHD6,ZC3H12A,NUP210,SEPT4,POLM,SLC11A2,DIP2A,SYMPK,EFTUD2,TBX18,LBX2,PCGF1,DR1,BCLAF1,CAMK2D,FYTTD1,ZNF721,ZNF397,JHDM1D,ZNF710,PLCB4,PRPF3,TNK2,GIT2,WAC,STK4,ZNF142,FUBP3,TRO,MTG1,RARS,ZNF540,COPS7B,FGFR1,HSF4,GTF3C1,PMS1,CELF1,SNCAIP,SF3A2,PAF1,SGK1,DPF2,RNF8,CDYL2,MDM2,SNAP23,DAZAP1,ANAPC16,ZNF595,TBP,IDH3G,YY1,INO80,GMEB2,PFDN5,CREB1,FLII,RPRD1A,CCNDBP1,ALDH6A1,CCNL2,NF1,ZEB1,NEK3,SERBP1,SETBP1,NUB1,NUMA1,EBF1,RPL9,MED28,PHF15,UNKL,ZNF3,RPS6KA5,G3BP1,NIPBL,ALKBH3,ZNF837,CASP2,HNRNPA3,RXRB,LMNA,NUDT6,RSL1D1,MITF,NOL8,PPP2R3C,RB1,PRMT5,HMGXB3,GNAI1,USP3,PLEKHA2,STX16,MZF1,ZFPM2,TP53BP1,RNF168,PAFAH1B1,ZNF865,SENP2,RPS19BP1,SLFN11,CALCOCO2,SYTL2,SUB1,PWP2,CHMP1A,NSA2,SYNE1,STK38L,ZNF558,MUM1,ZNF263,ZNF180,BICD1,NTMT1,ZNF276,RGS3,GCC2,NR1H3,PAN2,USP7,FLCN,ZNF605,CHFR,ZNF410,SAP30BP,VPS72,PTEN,FYN,SRPK1,RUNX2,CSTF1,IQGAP1,FBXW7,INTS4,SMARCD3,IKBKB,RQCD1,GGNBP2,KPNB1,SRGAP2,RFX7,NCOR1,ATP11B,PPP1R10,MEF2A,DYM,PARN,ZMYM5,PRKRIP1,SETD8,SMEK1,STK19,NECAB3,PIAS2,FIBP,MAPK8,MYCBP2,USP15,DDX41,MAN1A2,SRRM2,OSBPL3,PBX3,ZNF565,AFF4,TRIM28,DMTF1,PSMC6,SWAP70,RPF2,IMPDH1,RNF146,UBP1,SKIV2L2,DSN1,CDK6,NSFL1C,AGBL5,WDR61,EBF4,NUP37,PRPF8,APPL2,ZNF148,ZNF76,FLOT1,WDR13,CPSF3L,PSMC4,HNRNPL,STAG2,UBA2,SP110,RANBP9,ATPAF2,PAK1,RHEB,HNRNPH3,ZSWIM7,TCF4,ACD,IKZF5,HMGN2,WDR4,SSBP2,ATP6V0A1,TIMM50,DGKZ,NFYC,ZNF609,PIWIL4,SRSF10,SS18,RCOR3,SMAD4,MEMO1,ZNF114,MIER2,TGFB1I1,INO80E,EZR,ASB8,RPL4,MTRR,CENPT,ZNF44,AUP1,CREBZF,GOLPH3,ING4,RBMS1,ZNF687,CDC14B,CLK3,NR2C2,FHOD1,FIP1L1,DLST,DNTTIP2,FLNA,IRF9,SUN2,BCAS3,MSL1,ATP5A1,GLI3,ADD3,MAPK12,CCDC59,DCAF6,EPS15L1,EPN1,THOC2,VEZT,ENG,SIRT7,ZSCAN5A,TCF12,ARNT,NOX4,ZNF692,GAPDH,ERCC1,PHF1,PRELID1,STK36,WWP1,PHF12,REXO2,MED6,MDFI,CIRBP,NUP85,ZNF554,NAA10,CIZ1,RGS2,HINFP,STAM2,NCBP2,MLX,PDGFRB,TGS1,DZIP1,NCAPD3,RAD51B,CDK11A,GLIS3,NOB1,FAM76B,BDP1,DBF4,RUNX1,MKNK2,TRIM41,SMARCA4,LMNB1,NAA16,LRPPRC,RPLP0,SDAD1,RAD54L2,CLASRP,SNX27,ZNF518B,PTPN23,CRCP,CLK4,ZNF90,ZNF638,PER3,FGF14,DCAF17,CHTF8,KLHL7,PHC3,SNRPE,ANKRD6,ZNF383,POLR2J3,NCOR2,SETD2,S100PBP,KANSL3,PRPF4B,PTGIS,FTSJ3,NARF,WDFY3,TROVE2,ATXN3,MAU2,PHF21A,PDCD4,SOX13,CHD2,CRIPAK,LONP2,PSMA1,STAT6,ACIN1,CSNK1E,SON,ZNF138,CLIC4,ZNF705A,NSMCE4A,BNIP2,BTBD10,PNISR,SHPRH,SPRED1,BRWD1,SMAD9,DUSP6,LIMS2,ZBTB16,BAZ2A,RRP8,PHF19,LMCD1,SEPT2,LUC7L3,SENP6,PKD1,PDPK1,TSG101,USF1,FOXC1,ARL6IP4,KPNA1 | 1.206807127 | 2.96E-08 |
| GO:0003824 | catalytic activity | molecular_function | CDK14,USP10,CRBN,RAB3GAP2,DHX34,ACADVL,EIF2B4,PSMB10,XRN1,CKB,IGF1R,GK5,PTS,MYO1D,SIRT2,EPHX2,RALGAPA2,PPIL2,TARS,RAF1,NLRP1,SEPT5,LEPRE1,DDI2,CDK13,TAZ,ATP2B1,CPE,PLCD1,RAB34,ERCC6L2,ST3GAL1,MARCH5,DPP4,BCL6,CMPK2,ENOSF1,PTPN22,GBP3,SPATA20,SHMT2,ZFP91,EEF2K,PLD1,VAPB,NLN,GPAA1,PGS1,PARP6,EED,SLC9B2,AMT,SMPD4,SMAD7,MCF2L,USP4,PPFIBP2,HDAC6,ARHGEF12,EHMT1,ATP6V1D,VRK2,DYNC1I1,RNH1,TYW1B,CASP4,NARS,LANCL2,H6PD,DGKA,TTLL3,PRMT10,PNKP,LEF1,GLS,PSMB9,ARHGEF25,ADAMTS1,RGL4,BCL2L13,BCL2L11,XYLT1,STARD13,STARD9,XBP1,CPM,FDPS,PAM,ABCC1,GLT8D1,HSD17B12,DDX23,METTL3,SCRN3,MARK4,UHMK1,USP47,ADAM8,POLR3E,DNAJC10,RNF220,RAB35,RANBP1,SIPA1L1,MARCH6,DDX39A,KRIT1,SKIV2L,MINK1,RHOF,PTPN6,EEF1A1,CSNK2A1,IGBP1,NOD1,PRKACA,ANAPC4,RPP14,DHX9,PIGS,PLK1,PNPO,PDE7B,PREPL,ASNS,TBC1D2B,ECHDC1,DNM1L,TXNL1,PTGES2,UPF1,HDGF,FDXR,RC3H1,PPP5C,PIGG,PDXK,CCNL1,HERC2,CHD6,ZC3H12A,TBC1D10B,SEPT4,MIB2,POLM,SLC11A2,DIP2A,EFTUD2,FAM58A,ATG4B,CNP,CLN8,PIGN,GCDH,CAMK2D,JHDM1D,PLCB4,DHRSX,DNPEP,TBC1D14,GALK2,TNK2,ENGASE,USP20,GIT2,STK4,MTG1,RARS,ALDH18A1,MAN2C1,FGFR1,RAB18,C2,CFB,MMP16,NADSYN1,PMS1,ADCY4,PDE4D,RNASET2,TAB2,SGK1,PLEKHG4,CPT1B,CHKB,NADK,IDI1,RNF8,CDYL2,CYP2R1,SEC31A,MDM2,KCMF1,RHBDD1,FKBP1A,PRKCH,MTMR11,PPM1F,DIS3L,IDH3G,FAM13A,INO80,GPAT2,SSH2,CREB1,RALGPS2,NAGK,PLEKHG5,QSOX1,DDX58,ALDH6A1,ZCCHC9,CCNL2,PTPRK,SNX13,RHBDF1,SERPINH1,NF1,ACAA1,NEK3,RTKN,FKBP10,UNKL,NPR1,RPS6KA5,G3BP1,RAB31,ALKBH3,ADSL,ALG6,ST3GAL4,CAPN10,GCNT2,NTPCR,PKD2,CASP2,GALT,UBE2Q1,NEDD8-MDP1,MDP1,LMNA,NUDT6,USP24,RB1,PRMT5,HMGXB3,LTBP4,MAPK8IP3,RABGGTA,GNAI1,USP3,DHRS1,CPPED1,TXNDC5,RNF168,MARK3,PAFAH1B1,SENP2,ISYNA1,EDEM2,GPCPD1,MTCH1,RNF217,TPP1,SYTL2,DNALI1,CHMP1A,PDE8A,AACS,STK38L,DDX6,ACAP2,ANXA5,GALNT2,ADAM15,SH3BP5,USP33,BICD1,NTMT1,RGS3,NR1H3,GARS,CYTH2,PLK2,PAN2,HEXA,USP7,PLD6,NRP1,CHFR,PTGR2,TENC1,FMO2,GMDS,ARHGAP9,UST,MTMR14,MAST2,FAP,PTEN,FYN,ALDH1A3,IDH1,SRPK1,RNASEK,IQGAP1,C1R,FBXW7,PHPT1,PTP4A2,LGMN,HERPUD1,IKBKB,PXN,ADAMTS18,SRGAP2,PTPRF,NCOR1,ATP11B,PPP1R10,MEF2A,OXCT1,PARN,FECH,PRKRIP1,SETD8,COX7A2L,TMEM189,STK19,PIAS2,SSBP1,MAPK8,MYCBP2,MYLK,USP15,DDX41,MAN1A2,RNF213,N6AMT1,ABCA2,TRIM28,DENND4C,MAP4K4,CSK,CP,PTPRS,ITPA,PTPRC,OAZ1,PSMC6,TBCD,IMPDH1,RNF146,SKIV2L2,CDK6,ALDH16A1,AGBL5,DDHD2,FARSA,ABHD16A,CPSF3L,PSMC4,KIFC2,ARHGAP29,SGSM3,OGFOD3,UBA2,AAK1,GOPC,PPA2,ST6GALNAC5,PHKG2,PAK1,NCK2,LEPR,RHEB,MTMR9,CTSH,ACD,TRPM7,WDR4,SEMA4D,GNB3,CSF1R,TIMM50,DGKZ,C3,ALDH3B1,P4HB,HSD17B4,ELOVL1,FUT4,RPUSD4,GRPEL2,FNTB,CHURC1-FNTB,TBC1D22A,KLC1,NAV1,DDAH1,DTYMK,MTRR,MBOAT2,USP54,CDC14B,CLK3,DNHD1,DLST,RAB5A,CA5B,HGSNAT,MGAT5,BCS1L,C1S,ATP5A1,TMED2,THNSL2,NDUFV1,MAPK12,NDUFS2,RASGRF2,AK5,GUSB,B4GALT4,ENG,SIRT7,PCSK7,NOX4,ETFA,EXT1,GAPDH,ERCC1,GAA,NRBP2,B3GAT3,STK36,SDHA,WWP1,ATP8B2,ARHGEF7,PDIA5,NAT9,ASAP1,REXO2,MDFI,UBA6,RABGGTB,IDH3B,PTGR1,NUBP1,NAA10,PTPRD,RGS2,MAN2A2,LPCAT1,PDGFRB,EBPL,PTPN4,TGS1,RAD51B,CDK11A,MAN1B1,NIT1,CARD14,DIABLO,ENO4,MYO7B,FARP1,DBF4,RAP1B,MKNK2,TRIM41,SMARCA4,NAA16,USP40,YIF1A,DHX40,RAD54L2,ACYP2,KIF13B,PTPN23,RHBDF2,CRCP,CLK4,TLN1,DOCK8,ADRBK2,LONRF3,GSK3A,SIK3,THUMPD2,NLGN2,POLG,POLR2J3,TTLL11,FBXW2,FPGS,SETD2,TWF1,ATG4A,PCYT1A | 1.171525481 | 5.79E-08 |
| GO:0016043 | cellular component organization | biological_process | FZD6,CRBN,OBFC1,CADM1,PSMB10,CLMN,IGF1R,LAMB1,NPHP3,SIRT2,NOC2L,RAF1,F11R,LEPRE1,COL9A1,SFSWAP,CDK13,BDNF,TAZ,CPE,SART1,COL2A1,RAB34,SUPT5H,MARCH5,DPP4,BCL6,MMS19,SHMT2,GPAA1,CLNS1A,NUP98,EED,SMAD7,HDAC6,ARHGEF12,EHMT1,ATP6V1D,HGS,DERL2,CD72,TTLL3,ARPC4-TTLL3,LEF1,GLS,PAX8,SUPT4H1,ITGA9,BCL2L11,STARD9,COG4,NISCH,PAM,CEP135,HSD17B12,DDX23,APITD1,MARK4,UHMK1,USP47,ADAM8,CAPZB,PRPF40A,CD9,RANBP1,SIPA1L1,MINK1,PDLIM5,RHOF,ACTR3,LHX4,VASP,CSNK2A1,NOD1,PRKACA,ANAPC4,PLK1,COL16A1,TTC19,DNM1L,UPF1,RC3H1,PPP5C,CHD6,SEPT4,SLC11A2,ATG4B,CNP,CLN8,PCGF1,VAMP7,DR1,BCLAF1,CAMK2D,JHDM1D,BBS1,TBC1D14,TNK2,COL14A1,WAC,STK4,TRO,FGFR1,HPS4,HSF4,DISP1,CAPRIN1,MMP16,CELF1,SNCAIP,SF3A2,TIMM23,PAF1,SGK1,SHARPIN,TCHP,RNF8,KIAA0586,SEC31A,MDM2,SNAP23,COL12A1,FKBP1A,PRKCH,ANAPC16,PPM1F,YY1,TLN2,INO80,SSH2,CREB1,NPTN,RPL27,PTPRK,SERPINH1,LIMCH1,MAGI1,NF1,PIH1D1,NEK3,ATG12,NUMA1,RGMB,COL18A1,RPL9,PHF15,NPR1,RPS6KA5,NIPBL,RAB31,ADSL,BRD9,CAPN10,PKD2,LMNA,MITF,NOL8,RB1,PRMT5,LTBP4,MAPK8IP3,GNAI1,USP3,BLOC1S5,TXNDC5,NEXN,RNF168,PAFAH1B1,PUM2,MTCH1,TPP1,CHMP1A,ARPC2,SYNE1,STK38L,DDX6,ADAM15,MUM1,USP33,BICD1,NTMT1,GCC2,NR1H3,CYTH2,PLK2,HEXA,PLD6,FLCN,NRP1,CHFR,RPL24,IGFBP6,DAAM1,RPL37A,FAP,VPS72,PTEN,FYN,SRPK1,FBXW7,PHPT1,SMARCD3,IFT172,SNX17,PXN,KPNB1,SRGAP2,NCOR1,ATP11B,MEF2A,DYM,TNS1,FECH,ERAL1,SETD8,WASH4P,TCTN1,SSBP1,CACNB1,VILL,MAPK8,MYCBP2,CLTCL1,MYLK,N6AMT1,RAB8A,TRIM28,DENND4C,CSK,CDK5RAP2,COL9A3,ITPA,PTPRC,TBCD,DSN1,ABI3BP,WDR61,TSPAN4,NUP37,COX14,ZNF148,FLOT1,STAG2,AAK1,GOPC,RANBP9,WDR35,ATPAF2,PARD6G,PAK1,NCK2,RAB10,SEMA6A,TCF4,ACD,TRPM7,HMGN2,SEMA4D,CSF1R,ATP6V0A1,TIMM50,ACTR2,C3,P4HB,SRSF10,ROBO3,SS18,SMAD4,GRPEL2,KLC1,C1QTNF3,NAV1,TGFB1I1,EZR,RPL4,CENPT,GOLPH3,ING4,CDCA3,HPS3,FHOD1,FLNA,RAB5A,SUN2,MSL1,HGSNAT,BCS1L,GLI3,TMED2,ENG,SIRT7,NOX4,EXT1,GAPDH,ERCC1,VTI1B,PHF1,GAA,MTRF1L,SLC25A6,STK36,ARHGEF7,TBCE,ASAP1,UNC5B,CIRBP,NUP85,NUBP1,NAA10,HAUS5,PTPRD,ITGA5,STAM2,NCBP2,PDGFRB,COL8A1,TGS1,DZIP1,NCAPD3,CDK11A,CC2D2A,FARP1,SMARCA4,LMNB1,RPLP0,SDAD1,KIF13B,PTPN23,KCTD2,TLN1,GSK3A,SNRPE,NLGN2,POLG,SETD2,TWF1,KANSL3,COL13A1,IGF2,TROVE2,MYO1E,ATXN3,CORO7,AMFR,MAU2,PHF21A,GPHN,CRIPAK,LONP2,TANC1,ACIN1,ROBO2,SON,CACNB3,PMP22,KCTD17,CLIC4,BNIP2,NTRK1,TFAM,SHPRH,ATG3,BRWD1,HBB,TGFBR3,TMEM237,LIMS2,CD151,BAZ2A,PLOD2,RRP8,PHF19,LETM1,SEPT2,UQCRH,SENP6,PDPK1,TSG101,FOXC1,KPNA1,ACAN,STK24,SSH1,FMOD,C2CD3,MTO1,UBR5,EYA2,SMARCAD1,CLASP1,TENM4,GATA2,GORASP1 | 1.24787758 | 8.75E-08 |
| GO:0000166 | nucleotide binding | molecular_function | CDK14,DHX34,ACADVL,EIF2B4,CKB,IGF1R,GK5,TNRC6A,MYO1D,SIRT2,TRNAU1AP,TARS,RAF1,NLRP1,SEPT5,CDK13,RBM6,ATP2B1,RAB34,ERCC6L2,CMPK2,GBP3,EEF2K,PGS1,RBM17,SLC9B2,MCF2L,ARHGEF12,VRK2,TYW1B,NARS,LANCL2,H6PD,DGKA,PNKP,ARHGEF25,RGL4,RBPMS,STARD9,ABCC1,SNRNP70,HSD17B12,DDX23,MARK4,UHMK1,RAB35,RANBP1,DDX39A,SKIV2L,MINK1,RHOF,EEF1A1,ACTR3,CSNK2A1,UPF3A,NOD1,PRKACA,DHX9,PLK1,PNPO,ASNS,DNM1L,UPF1,HDGF,FDXR,PDXK,RHOBTB1,HERC2,CHD6,SEPT4,EFTUD2,RAB24,CNP,GCDH,CAMK2D,DHRSX,GALK2,TNK2,STK4,MTG1,RARS,ALDH18A1,FGFR1,RAB18,NADSYN1,PMS1,ADCY4,CELF1,PDE4D,SGK1,PLEKHG4,CHKB,NADK,PRKCH,DAZAP1,IDH3G,INO80,RALGPS2,NAGK,PLEKHG5,DDX58,FAM114A2,MAGI1,NEK3,EIF4B,RTKN,NPR1,RPS6KA5,G3BP1,RAB31,NTPCR,HNRNPA3,UBE2Q1,NOL8,GNAI1,DHRS1,MARK3,ISYNA1,SLFN11,AACS,STK38L,DDX6,GARS,CYTH2,PLK2,CHFR,PTGR2,FMO2,GMDS,MAST2,FYN,ALDH1A3,IDH1,SRPK1,RUNX2,IKBKB,ATP11B,PARN,ERAL1,STK19,MAPK8,MYLK,DDX41,RNF213,ABCA2,RAB8A,DENND4C,MAP4K4,CSK,ITPA,PSMC6,SWAP70,IMPDH1,SKIV2L2,CDK6,FARSA,PSMC4,HNRNPL,KIFC2,UBA2,AAK1,PHKG2,PAK1,RAB10,RHEB,HNRNPH3,TRPM7,CSF1R,DGKZ,ACTR2,HSD17B4,SRSF10,GRPEL2,NAV1,DTYMK,MTRR,RBMS1,CLK3,RAB5A,BCS1L,ATP5A1,NDUFV1,MAPK12,NDUFS2,RASGRF2,AK5,SIRT7,NOX4,ETFA,GAPDH,NRBP2,STK36,SDHA,ATP8B2,ARHGEF7,CIRBP,UBA6,IDH3B,PTGR1,NUBP1,NCBP2,PDGFRB,RAD51B,CDK11A,MYO7B,FARP1,RAP1B,RUNX1,MKNK2,SMARCA4,DHX40,RAD54L2,KIF13B,CRCP,CLK4,ZNF638,DOCK8,ADRBK2,GSK3A,SIK3,FPGS,TWF1,PRPF4B,MYO1E,D2HGDH,PSTK,GPHN,ARL15,RGL2,CHD2,RABL3,LONP2,CARS2,ACIN1,PSD3,CSNK1E,NTRK1,SHPRH,PHKG1,SIRT3,UCK1,VARS,LARS,DHX37,SEPT2,PDPK1,STK24,RAPGEF6,GAK,MTO1,PABPC1,RBKS,PANK3,FASTK,SMARCAD1,WNK1,DENND6B,PABPN1 | 1.340286467 | 1.15E-07 |
| GO:1901265 | nucleoside phosphate binding | molecular_function | CDK14,DHX34,ACADVL,EIF2B4,CKB,IGF1R,GK5,TNRC6A,MYO1D,SIRT2,TRNAU1AP,TARS,RAF1,NLRP1,SEPT5,CDK13,RBM6,ATP2B1,RAB34,ERCC6L2,CMPK2,GBP3,EEF2K,PGS1,RBM17,SLC9B2,MCF2L,ARHGEF12,VRK2,TYW1B,NARS,LANCL2,H6PD,DGKA,PNKP,ARHGEF25,RGL4,RBPMS,STARD9,ABCC1,SNRNP70,HSD17B12,DDX23,MARK4,UHMK1,RAB35,RANBP1,DDX39A,SKIV2L,MINK1,RHOF,EEF1A1,ACTR3,CSNK2A1,UPF3A,NOD1,PRKACA,DHX9,PLK1,PNPO,ASNS,DNM1L,UPF1,HDGF,FDXR,PDXK,RHOBTB1,HERC2,CHD6,SEPT4,EFTUD2,RAB24,CNP,GCDH,CAMK2D,DHRSX,GALK2,TNK2,STK4,MTG1,RARS,ALDH18A1,FGFR1,RAB18,NADSYN1,PMS1,ADCY4,CELF1,PDE4D,SGK1,PLEKHG4,CHKB,NADK,PRKCH,DAZAP1,IDH3G,INO80,RALGPS2,NAGK,PLEKHG5,DDX58,FAM114A2,MAGI1,NEK3,EIF4B,RTKN,NPR1,RPS6KA5,G3BP1,RAB31,NTPCR,HNRNPA3,UBE2Q1,NOL8,GNAI1,DHRS1,MARK3,ISYNA1,SLFN11,AACS,STK38L,DDX6,GARS,CYTH2,PLK2,CHFR,PTGR2,FMO2,GMDS,MAST2,FYN,ALDH1A3,IDH1,SRPK1,RUNX2,IKBKB,ATP11B,PARN,ERAL1,STK19,MAPK8,MYLK,DDX41,RNF213,ABCA2,RAB8A,DENND4C,MAP4K4,CSK,ITPA,PSMC6,SWAP70,IMPDH1,SKIV2L2,CDK6,FARSA,PSMC4,HNRNPL,KIFC2,UBA2,AAK1,PHKG2,PAK1,RAB10,RHEB,HNRNPH3,TRPM7,CSF1R,DGKZ,ACTR2,HSD17B4,SRSF10,GRPEL2,NAV1,DTYMK,MTRR,RBMS1,CLK3,RAB5A,BCS1L,ATP5A1,NDUFV1,MAPK12,NDUFS2,RASGRF2,AK5,SIRT7,NOX4,ETFA,GAPDH,NRBP2,STK36,SDHA,ATP8B2,ARHGEF7,CIRBP,UBA6,IDH3B,PTGR1,NUBP1,NCBP2,PDGFRB,RAD51B,CDK11A,MYO7B,FARP1,RAP1B,RUNX1,MKNK2,SMARCA4,DHX40,RAD54L2,KIF13B,CRCP,CLK4,ZNF638,DOCK8,ADRBK2,GSK3A,SIK3,FPGS,TWF1,PRPF4B,MYO1E,D2HGDH,PSTK,GPHN,ARL15,RGL2,CHD2,RABL3,LONP2,CARS2,ACIN1,PSD3,CSNK1E,NTRK1,SHPRH,PHKG1,SIRT3,UCK1,VARS,LARS,DHX37,SEPT2,PDPK1,STK24,RAPGEF6,GAK,MTO1,PABPC1,RBKS,PANK3,FASTK,SMARCAD1,WNK1,DENND6B,PABPN1 | 1.339771171 | 1.19E-07 |
| GO:0005829 | cytosol | cellular_component | CDK14,EIF2B4,PSMB10,XRN1,CKB,PTS,TNRC6A,EPHX2,RALGAPA2,TARS,RAF1,NLRP1,PLCD1,SART1,RILPL1,MMS19,EEF2K,CUX1,CLNS1A,NUP98,SMAD7,MCF2L,HDAC6,ARHGEF12,ATP6V1D,DYNC1I1,HGS,NARS,LANCL2,DGKA,GLS,PSMB9,ARHGEF25,BCL2L11,STARD13,FDPS,NISCH,CEP135,APITD1,NOL3,CAPZB,XAF1,PDLIM5,RHOF,PTPN6,EEF1A1,VASP,CSNK2A1,UPF3A,NOD1,PRKACA,STAT2,ANAPC4,PLK1,SDCCAG8,PNPO,PDE7B,PREPL,ASNS,ECHDC1,NUTF2,DNM1L,PTGES2,UPF1,PPP5C,PDXK,RHOBTB1,RAB24,CAMK2D,PLCB4,ENGASE,STK4,RARS,SIKE1,FGFR1,PAIP1,CAPRIN1,NADSYN1,PDE4D,TAB2,SHARPIN,CHKB,NADK,IDI1,RUSC2,SEC31A,MDM2,FKBP1A,PRKCH,PPM1F,FAM13A,PFDN5,SRP9,TNFRSF25,PLEKHG5,DDX58,RPL27,LCP2,EIF4B,NUMA1,TPM4,RPL9,G3BP1,ADSL,CAPN10,CASP2,GALT,PRMT5,BLOC1S5,PAFAH1B1,GPCPD1,IL18,PDE8A,AACS,DDX6,BICD1,RGS3,GARS,GRB10,MRPS7,PAN2,USP7,NRP1,RPL24,ARHGAP9,MTMR14,RPL37A,PTEN,FYN,IDH1,PHPT1,IKBKB,RQCD1,SNX17,KPNB1,SRGAP2,PARN,MAPK8,MYLK,OSBPL3,DENND4C,CSK,CDK5RAP2,OAZ1,PSMC6,IMPDH1,RNF146,DSN1,CDK6,AGBL5,NUP37,DDHD2,FARSA,PSMC4,ARHGAP29,RANBP9,PHKG2,PARD6G,PAK1,NCK2,RHEB,CTSH,ERC1,SMAD4,MEMO1,KLC1,DTYMK,EZR,RPL4,MTRR,CENPT,GOLPH3,TANK,CDCA3,FLNA,IRF9,GLI3,MAPK12,RASGRF2,AK5,GAPDH,WWP1,ARHGEF7,NUP85,NUBP1,RGS2,STAM2,NCBP2,TGS1,DIABLO,ENO4,FARP1,RAP1B,RPLP0,SNX27,TLN1,DOCK8,GSK3A,SNRPE,FPGS,PCYT1A,CORO7,DPP7,DYNC1I2,MOB1A,PDCD4,PGM2,PSMA1,STAT6,CARS2,ACIN1,CSNK1E,CACNB3,CLIC4,BNIP2,PHKG1,ATG3,SMAD9,HBB,DUSP6,LIMS2,CD151,UCK1,EIF3I,VARS,LARS,PDPK1,KPNA1,STK24,PABPC1,CLASP1,PLA2G16,GORASP1,BCL2L2 | 1.366057029 | 1.51E-07 |
| GO:0036094 | small molecule binding | molecular_function | CDK14,DHX34,ACADVL,EIF2B4,CKB,IGF1R,GK5,TNRC6A,MYO1D,SIRT2,TRNAU1AP,TARS,RAF1,NLRP1,SEPT5,LEPRE1,CDK13,RBM6,ATP2B1,RAB34,ERCC6L2,CMPK2,GBP3,EEF2K,PGS1,RBM17,SLC9B2,MCF2L,ARHGEF12,VRK2,TYW1B,NARS,LANCL2,H6PD,DGKA,PNKP,ARHGEF25,RGL4,RBPMS,STARD9,PAM,ABCC1,SNRNP70,HSD17B12,DDX23,MARK4,UHMK1,RAB35,RANBP1,DDX39A,SKIV2L,MINK1,RHOF,EEF1A1,ACTR3,CSNK2A1,UPF3A,NOD1,PRKACA,DHX9,PLK1,PNPO,ASNS,DNM1L,UPF1,HDGF,FDXR,PDXK,NPC1,RHOBTB1,HERC2,CHD6,SEPT4,EFTUD2,RAB24,CNP,GCDH,CAMK2D,DHRSX,GALK2,TNK2,STK4,MTG1,RARS,ALDH18A1,FGFR1,RAB18,NADSYN1,PMS1,ADCY4,CELF1,PDE4D,SGK1,PLEKHG4,CHKB,NADK,PRKCH,DAZAP1,IDH3G,INO80,RALGPS2,NAGK,PLEKHG5,DDX58,FAM114A2,MAGI1,NEK3,EIF4B,RTKN,NPR1,RPS6KA5,G3BP1,RAB31,ALKBH3,NTPCR,HNRNPA3,UBE2Q1,NOL8,GNAI1,DHRS1,MARK3,ISYNA1,SLFN11,STARD3,AACS,STK38L,DDX6,NR1H3,GARS,CYTH2,PLK2,CHFR,PTGR2,FMO2,GMDS,MAST2,FYN,ALDH1A3,IDH1,SRPK1,RUNX2,IKBKB,ATP11B,PARN,ERAL1,STK19,MAPK8,MYLK,DDX41,OSBPL3,RNF213,ABCA2,RAB8A,DENND4C,MAP4K4,CSK,ITPA,PSMC6,SWAP70,IMPDH1,SKIV2L2,CDK6,FARSA,PSMC4,HNRNPL,KIFC2,OGFOD3,UBA2,AAK1,PHKG2,PAK1,RAB10,RHEB,HNRNPH3,TRPM7,CSF1R,DGKZ,ACTR2,HSD17B4,SRSF10,GRPEL2,NAV1,DTYMK,MTRR,RBMS1,CLK3,RAB5A,BCS1L,ATP5A1,NDUFV1,MAPK12,NDUFS2,RASGRF2,AK5,SIRT7,NOX4,ETFA,GAPDH,NRBP2,STK36,SDHA,ATP8B2,ARHGEF7,CIRBP,UBA6,IDH3B,PTGR1,NUBP1,NCBP2,PDGFRB,RAD51B,CDK11A,MYO7B,FARP1,RAP1B,RUNX1,MKNK2,SMARCA4,DHX40,RAD54L2,KIF13B,CRCP,CLK4,ZNF638,DOCK8,ADRBK2,GSK3A,SIK3,FPGS,TWF1,PRPF4B,MYO1E,D2HGDH,PSTK,GPHN,ARL15,RGL2,CHD2,RABL3,LONP2,CARS2,ACIN1,PSD3,CSNK1E,NTRK1,SHPRH,PHKG1,SIRT3,PLOD2,UCK1,VARS,LARS,DHX37,SEPT2,PDPK1,STK24,RAPGEF6,GAK,MTO1,PABPC1,RBKS,PANK3,FASTK,SMARCAD1,WNK1,DENND6B,PABPN1 | 1.314730471 | 3.57E-07 |
| GO:0071840 | cellular component organization or biogenesis | biological_process | FZD6,CRBN,OBFC1,CADM1,PSMB10,CLMN,IGF1R,LAMB1,NPHP3,SIRT2,NOC2L,RAF1,F11R,LEPRE1,COL9A1,SFSWAP,CDK13,BDNF,TAZ,CPE,SART1,COL2A1,RAB34,SUPT5H,MARCH5,DPP4,BCL6,MMS19,SHMT2,GPAA1,CLNS1A,NUP98,EED,SMAD7,HDAC6,ARHGEF12,EHMT1,ATP6V1D,HGS,DERL2,CD72,TTLL3,ARPC4-TTLL3,LEF1,GLS,PAX8,SUPT4H1,ITGA9,BCL2L11,STARD9,COG4,NISCH,PAM,CEP135,HSD17B12,DDX23,APITD1,MARK4,UHMK1,USP47,ADAM8,CAPZB,PRPF40A,CD9,RANBP1,SIPA1L1,MINK1,PDLIM5,RHOF,ACTR3,LHX4,VASP,CSNK2A1,NOD1,PRKACA,ANAPC4,PLK1,COL16A1,TTC19,DNM1L,UPF1,RC3H1,PPP5C,CHD6,SEPT4,SLC11A2,ATG4B,CNP,CLN8,PCGF1,VAMP7,DR1,BCLAF1,CAMK2D,JHDM1D,BBS1,TBC1D14,TNK2,COL14A1,WAC,STK4,TRO,MTG1,FGFR1,HPS4,HSF4,DISP1,CAPRIN1,MMP16,CELF1,SNCAIP,SF3A2,TIMM23,PAF1,SGK1,SHARPIN,TCHP,RNF8,KIAA0586,SEC31A,MDM2,SNAP23,COL12A1,FKBP1A,PRKCH,ANAPC16,PPM1F,YY1,TLN2,INO80,SSH2,CREB1,NPTN,RPL27,PTPRK,SERPINH1,LIMCH1,MAGI1,NF1,PIH1D1,NEK3,ATG12,NUMA1,RGMB,COL18A1,RPL9,PHF15,NPR1,RPS6KA5,NIPBL,RAB31,ADSL,BRD9,CAPN10,PKD2,LMNA,MITF,NOL8,RB1,PRMT5,LTBP4,MAPK8IP3,GNAI1,USP3,BLOC1S5,TXNDC5,NEXN,RNF168,PAFAH1B1,PUM2,MTCH1,TPP1,CHMP1A,NSA2,ARPC2,SYNE1,STK38L,DDX6,ADAM15,MUM1,USP33,BICD1,NTMT1,LYSMD4,GCC2,NR1H3,CYTH2,PLK2,HEXA,PLD6,FLCN,NRP1,CHFR,RPL24,IGFBP6,DAAM1,RPL37A,FAP,VPS72,PTEN,FYN,SRPK1,FBXW7,PHPT1,SMARCD3,IFT172,SNX17,PXN,KPNB1,SRGAP2,NCOR1,ATP11B,MEF2A,DYM,TNS1,FECH,ERAL1,SETD8,WASH4P,TCTN1,SSBP1,CACNB1,VILL,MAPK8,MYCBP2,CLTCL1,MYLK,N6AMT1,RAB8A,TRIM28,DENND4C,CSK,CDK5RAP2,COL9A3,ITPA,PTPRC,TBCD,SKIV2L2,DSN1,ABI3BP,WDR61,TSPAN4,NUP37,COX14,ZNF148,FLOT1,STAG2,AAK1,GOPC,RANBP9,WDR35,ATPAF2,PARD6G,PAK1,NCK2,RAB10,SEMA6A,TCF4,ACD,TRPM7,HMGN2,SEMA4D,CSF1R,ATP6V0A1,TIMM50,ACTR2,C3,P4HB,SRSF10,ROBO3,SS18,SMAD4,GRPEL2,KLC1,C1QTNF3,NAV1,TGFB1I1,EZR,RPL4,CENPT,GOLPH3,ING4,CDCA3,HPS3,FHOD1,FLNA,RAB5A,SUN2,MSL1,HGSNAT,BCS1L,GLI3,TMED2,ENG,SIRT7,NOX4,EXT1,GAPDH,ERCC1,VTI1B,PHF1,GAA,MTRF1L,SLC25A6,STK36,ARHGEF7,TBCE,ASAP1,UNC5B,CIRBP,NUP85,NUBP1,NAA10,HAUS5,PTPRD,ITGA5,STAM2,NCBP2,PDGFRB,COL8A1,TGS1,DZIP1,NCAPD3,CDK11A,CC2D2A,FARP1,SMARCA4,LMNB1,RPLP0,SDAD1,KIF13B,PTPN23,KCTD2,TLN1,GSK3A,SNRPE,NLGN2,POLG,SETD2,TWF1,KANSL3,COL13A1,IGF2,FTSJ3,TROVE2,MYO1E,ATXN3,CORO7,AMFR,MAU2,PHF21A,GPHN,CRIPAK,LONP2,TANC1,ACIN1,ROBO2,SON,CACNB3,PMP22,KCTD17,CLIC4,BNIP2,NTRK1,TFAM,SHPRH,ATG3,BRWD1,HBB,TGFBR3,TMEM237,LIMS2,CD151,BAZ2A,PLOD2,RRP8,PHF19,LETM1,SEPT2,UQCRH,SENP6,PDPK1,TSG101,FOXC1,KPNA1,ACAN,STK24,SSH1,FMOD,C2CD3,MTO1,UBR5,EYA2,SMARCAD1,CLASP1,TENM4,GATA2,GORASP1 | 1.230123361 | 3.73E-07 |
| GO:0005730 | nucleolus | cellular_component | RNASEH2B,CRBN,OBFC1,EPHX2,UTRN,NOC2L,PPIL2,PPP1R13B,RSC1A1,CBX5,SART1,CCDC91,RAB34,SUPT5H,RILPL1,BCL6,FUBP1,CMPK2,ZFP91,CUX1,RBM17,FMR1,HDAC6,SYTL4,PNKP,PAX8,CPM,FDPS,ABCC1,NOM1,DDX23,NOL3,POLR3E,PRPF40A,SUGP1,UPF3A,DHX9,PDXK,ZC3H12A,SEPT4,SYMPK,EFTUD2,PCGF1,BCLAF1,JHDM1D,PRPF3,MTG1,RARS,GTF3C1,SNCAIP,PAF1,DPF2,MDM2,SNAP23,DAZAP1,IDH3G,GMEB2,CREB1,FLII,ALDH6A1,ZEB1,NUMA1,RPL9,MED28,ZNF3,HNRNPA3,RSL1D1,NOL8,STX16,PAFAH1B1,RPS19BP1,CALCOCO2,SUB1,PWP2,NSA2,SYNE1,STK38L,ZNF263,NTMT1,SAP30BP,RUNX2,IQGAP1,FBXW7,PARN,PRKRIP1,DDX41,MAN1A2,SRRM2,AFF4,DMTF1,PSMC6,RPF2,SKIV2L2,WDR61,ZNF148,WDR13,PSMC4,SP110,HNRNPH3,ATP6V0A1,DGKZ,SMAD4,INO80E,EZR,RPL4,MTRR,ZNF44,AUP1,ZNF687,CDC14B,CLK3,NR2C2,FIP1L1,DNTTIP2,MSL1,GLI3,ENG,SIRT7,ERCC1,PRELID1,PHF12,REXO2,RGS2,HINFP,STAM2,NCBP2,RUNX1,SDAD1,SNX27,ZNF638,DCAF17,KLHL7,NCOR2,PRPF4B,FTSJ3,TROVE2,PDCD4,PSMA1,STAT6,ACIN1,SON,BTBD10,SPRED1,BRWD1,BAZ2A,RRP8,SEPT2,LUC7L3,SENP6,TSG101,FOXC1,ZC3H14,PHC2,SMARCAD1,SYCP2L,ZC3H15,GATA2,PABPN1 | 1.431032873 | 1.67E-06 |
| GO:0005654 | nucleoplasm | cellular_component | PBX2,GTF3C2,PSMB10,NOC2L,CDK13,SIN3B,CBX5,SART1,SUPT5H,SUPT20H,TBX2,MMS19,NUP98,EED,FMR1,SMAD7,HDAC6,ZNF496,LEF1,PAX8,SUPT4H1,PSMB9,XBP1,SNRNP70,DDX23,METTL3,APITD1,POLR3E,PRPF40A,SUGP1,CSNK2A1,STAT2,ANAPC4,DHX9,PLK1,HDGF,CCNL1,SYMPK,EFTUD2,DR1,CAMK2D,FYTTD1,PRPF3,GIT2,WAC,GTF3C1,SF3A2,PAF1,MDM2,TBP,YY1,CREB1,RPRD1A,CCNL2,ZEB1,NUMA1,MED28,PHF15,RPS6KA5,ALKBH3,HNRNPA3,RXRB,LMNA,RB1,ZFPM2,TP53BP1,SENP2,RPS19BP1,SUB1,NR1H3,USP7,CHFR,PTEN,RUNX2,CSTF1,FBXW7,INTS4,SMARCD3,KPNB1,NCOR1,MEF2A,PIAS2,MAPK8,SRRM2,PBX3,TRIM28,PSMC6,WDR61,PRPF8,APPL2,PSMC4,HNRNPL,STAG2,ATPAF2,TCF4,ACD,WDR4,TIMM50,NFYC,SRSF10,SMAD4,ING4,CDC14B,CLK3,NR2C2,FIP1L1,IRF9,MSL1,GLI3,MAPK12,TCF12,ARNT,ERCC1,PHF1,PHF12,MED6,CIRBP,HINFP,NCBP2,TGS1,RAD51B,FAM76B,BDP1,DBF4,MKNK2,LMNB1,NAA16,LRPPRC,ZNF638,SNRPE,NCOR2,KANSL3,ATXN3,MAU2,PHF21A,PSMA1,ACIN1,SON,PNISR,SMAD9,DUSP6,ZBTB16,PHF19,LUC7L3,PDPK1,USF1,FOXC1,KPNA1,ZC3H14,STK24,GATA2,PABPN1 | 1.424638862 | 3.49E-06 |
| GO:0016787 | hydrolase activity | molecular_function | USP10,CRBN,RAB3GAP2,DHX34,ACADVL,EIF2B4,PSMB10,XRN1,MYO1D,SIRT2,EPHX2,RALGAPA2,RAF1,NLRP1,SEPT5,DDI2,ATP2B1,CPE,PLCD1,RAB34,ERCC6L2,DPP4,BCL6,PTPN22,GBP3,PLD1,VAPB,NLN,GPAA1,SMPD4,MCF2L,USP4,HDAC6,ARHGEF12,ATP6V1D,DYNC1I1,RNH1,CASP4,H6PD,PNKP,LEF1,GLS,PSMB9,ARHGEF25,ADAMTS1,RGL4,BCL2L13,BCL2L11,STARD13,STARD9,XBP1,CPM,ABCC1,DDX23,SCRN3,USP47,ADAM8,DNAJC10,RAB35,RANBP1,SIPA1L1,DDX39A,KRIT1,SKIV2L,MINK1,RHOF,PTPN6,EEF1A1,CSNK2A1,IGBP1,NOD1,PRKACA,RPP14,DHX9,PIGS,PDE7B,PREPL,ASNS,TBC1D2B,DNM1L,UPF1,HDGF,PPP5C,HERC2,CHD6,ZC3H12A,TBC1D10B,SEPT4,SLC11A2,EFTUD2,ATG4B,CNP,PIGN,PLCB4,DNPEP,TBC1D14,TNK2,ENGASE,USP20,GIT2,MTG1,MAN2C1,FGFR1,RAB18,C2,CFB,MMP16,NADSYN1,PMS1,ADCY4,PDE4D,RNASET2,PLEKHG4,IDI1,SEC31A,MDM2,RHBDD1,FKBP1A,MTMR11,PPM1F,DIS3L,FAM13A,INO80,SSH2,CREB1,RALGPS2,PLEKHG5,DDX58,ZCCHC9,PTPRK,SNX13,RHBDF1,SERPINH1,NF1,RTKN,G3BP1,RAB31,ALKBH3,CAPN10,NTPCR,CASP2,NEDD8-MDP1,MDP1,LMNA,NUDT6,USP24,GNAI1,USP3,CPPED1,PAFAH1B1,SENP2,EDEM2,GPCPD1,MTCH1,TPP1,SYTL2,DNALI1,CHMP1A,PDE8A,DDX6,ACAP2,ANXA5,ADAM15,USP33,BICD1,RGS3,NR1H3,CYTH2,PAN2,HEXA,USP7,PLD6,TENC1,ARHGAP9,MTMR14,FAP,PTEN,RNASEK,IQGAP1,C1R,PHPT1,PTP4A2,LGMN,HERPUD1,ADAMTS18,SRGAP2,PTPRF,NCOR1,ATP11B,PPP1R10,MEF2A,PARN,SSBP1,MAPK8,USP15,DDX41,MAN1A2,RNF213,ABCA2,DENND4C,MAP4K4,PTPRS,ITPA,PTPRC,PSMC6,TBCD,SKIV2L2,AGBL5,DDHD2,ABHD16A,CPSF3L,PSMC4,KIFC2,ARHGAP29,SGSM3,GOPC,PPA2,LEPR,RHEB,MTMR9,CTSH,SEMA4D,GNB3,TIMM50,C3,GRPEL2,TBC1D22A,KLC1,NAV1,DDAH1,USP54,CDC14B,DNHD1,RAB5A,BCS1L,C1S,ATP5A1,TMED2,RASGRF2,GUSB,SIRT7,PCSK7,ERCC1,GAA,ATP8B2,ARHGEF7,PDIA5,ASAP1,REXO2,NUBP1,PTPRD,RGS2,MAN2A2,PDGFRB,PTPN4,RAD51B,MAN1B1,NIT1,DIABLO,MYO7B,FARP1,RAP1B,SMARCA4,USP40,YIF1A,DHX40,RAD54L2,ACYP2,KIF13B,PTPN23,RHBDF2,TLN1,DOCK8,LONRF3,GSK3A,NLGN2,POLG,ATG4A,PPAP2A,PDIA3,MYO1E,ATXN3,DPP7,DYNC1I2,ERI3,RGL2,CHD2,LONP2,PSMA1,ACIN1,PSD3,CTBS,BNIP2,NTRK1,SHPRH,SPRED1,TNFRSF10B,LMF1,DUSP6,ABHD4,STAMBPL1,SIRT3,CPAMD8,SPCS3,PPT2,EGFL8,VARS,LARS,DHX37,CES2,SENP6,DDAH2,SSH1,RAPGEF6,MMP25,EYA2,SMARCAD1,WNK1,DENND6B,PLA2G16 | 1.243430412 | 3.50E-06 |
| GO:0005912 | adherens junction | cellular_component | LPP,EPHX2,SMAD7,VASP,TNK2,SIKE1,AFAP1,TLN2,FLII,PTPRK,NEXN,ESAM,ARPC2,ADAM15,TENC1,PXN,TNS1,ITGB5,PTPRC,TBCD,PAK1,TGFB1I1,EZR,VEZT,NOX4,ARHGEF7,ITGA5,TLN1,MYO1E,LIMS2,LUC7L3,PDPK1,GAK | 2.332221296 | 4.21E-06 |
| GO:0009056 | catabolic process | biological_process | USP10,RNASEH2B,CRBN,RAB3GAP2,DHX34,ACADVL,EIF2B4,PSMB10,XRN1,GK5,MYO1D,SIRT2,EPHX2,RALGAPA2,SEPT5,ATP2B1,SPOP,PLCD1,RAB34,SUPT5H,SUPT20H,UBXN1,BCL6,ENOSF1,GBP3,PLD1,AMT,SMPD4,SMAD7,MCF2L,USP4,HDAC6,ARHGEF12,ATP6V1D,RNH1,HGS,DERL2,H6PD,PNKP,GLS,PSMB9,ARHGEF25,RGL4,STARD13,ABCC1,DDX23,RAD23A,USP47,ADAM8,DNAJC10,RAB35,RANBP1,SIPA1L1,DDX39A,KRIT1,SKIV2L,MINK1,RHOF,EEF1A1,CSNK2A1,UPF3A,PRKACA,ANAPC4,DHX9,PLK1,PDE7B,TBC1D2B,DNM1L,UPF1,RC3H1,NPC1,HERC2,CHD6,ZC3H12A,TBC1D10B,SEPT4,EFTUD2,RAB24,ATG4B,CNP,CLN8,GCDH,PLCB4,TBC1D14,TNK2,USP20,GIT2,WAC,MTG1,RAB18,PAIP1,PMS1,PDE4D,RNASET2,PLEKHG4,CPT1B,RNF8,MDM2,RHBDD1,DIS3L,FAM13A,INO80,RALGPS2,NAGK,PLEKHG5,DDX58,ALDH6A1,RPL27,SNX13,RHBDF1,NF1,ACAA1,EIF4B,NUB1,ATG12,RTKN,RPL9,G3BP1,RAB31,GALT,USP24,GNAI1,USP3,RNF168,PAFAH1B1,RNF217,TPP1,PDE8A,DDX6,ACAP2,USP33,LYSMD4,RGS3,CYTH2,PAN2,HEXA,USP7,PLD6,CUL4A,CHFR,RPL24,ARHGAP9,RPL37A,PTEN,FYN,IQGAP1,FBXW7,HERPUD1,RQCD1,SNX17,KPNB1,SRGAP2,NCOR1,ATP11B,OXCT1,PARN,USP15,DDX41,RNF213,ABCA2,DENND4C,MAP4K4,ITPA,PSMC6,TBCD,RNF146,SKIV2L2,DDHD2,PSMC4,ARHGAP29,SGSM3,GOPC,PHKG2,RHEB,CTSH,SEMA4D,GNB3,OS9,ALDH3B1,HSD17B4,FUT4,SMAD4,GRPEL2,TBC1D22A,TGFB1I1,DDAH1,RPL4,USP54,DLST,FLNA,RAB5A,HGSNAT,ATP5A1,TMED2,THNSL2,RASGRF2,GUSB,ARNT,GAPDH,ERCC1,GAA,NRBP2,WWP1,ATP8B2,ARHGEF7,ASAP1,UBA6,RGS2,NCBP2,LPCAT1,VPS51,RAD51B,MAN1B1,ENO4,FARP1,RAP1B,SMARCA4,USP40,RPLP0,DHX40,DOCK8,LONRF3,GSK3A,ATG4A,MYO1E,ATXN3,ATG16L2,AMFR,PGM2,RGL2,CHD2,LONP2,PSMA1,ACIN1,PSD3,CSNK1E,CTBS,BNIP2,NTRK1,PHKG1,ATG3,HBB,ABHD4,DHX37,CES2,TSG101,KPNA1,DDAH2,ACAN,RAPGEF6,FMOD,PABPC1,RBKS,UBR5,SMARCAD1,DENND6B,PLA2G16 | 1.283821487 | 4.90E-06 |
| GO:0051246 | regulation of protein metabolic process | biological_process | ACADVL,EIF2B4,PSMB10,IGF1R,TNRC6A,TRNAU1AP,NOC2L,RAF1,UBXN1,ZFP91,CNTF,EEF2K,VAPB,FMR1,SMAD7,USP4,HDAC6,GLG1,HGS,PSMB9,RBPMS,XBP1,RAD23A,APITD1,UHMK1,ADAM8,DNAJC10,PTPN6,CSNK2A1,IGBP1,UPF3A,NOD1,PRKACA,ANAPC4,PLK1,ASNS,UPF1,HDGF,CCNL1,SEPT4,SYMPK,FAM58A,CLN8,GIGYF2,TNK2,WAC,STK4,ZNF540,FGFR1,C2,CFB,PAIP1,CAPRIN1,ADCY4,CELF1,TAB2,RNF8,SEC31A,MDM2,RHBDD1,FKBP1A,PPM1F,NPTN,SRP9,CCNL2,RHBDF1,SERPINH1,NF1,EIF4B,NUB1,RPS6KA5,NIPBL,PKD2,LMNA,RB1,LTBP4,MAPK8IP3,RNF168,SENP2,PUM2,TPP1,SH3BP5,RGS3,NR1H3,FLCN,NRP1,CUL4A,MAST2,PTEN,FYN,IQGAP1,FBXW7,HERPUD1,PXN,NCOR1,FECH,PRKRIP1,NECAB3,MAPK8,CSK,PTPRC,PSMC6,WDR61,PSMC4,SGSM3,PAK1,NCK2,SEMA4D,CSF1R,C3,PIWIL4,SMAD4,CD276,CDC14B,FLNA,AK5,ENG,ARNT,NOX4,GAPDH,PHF1,PDIA5,MDFI,CIRBP,ITGA5,RGS2,NCBP2,LPCAT1,PDGFRB,CARD14,TNFRSF14,MKNK2,YIF1A,TLN1,GSK3A,TWF1,IGF2,PSTK,PDCD4,CRIPAK,PSMA1,CSNK1E,CDK5RAP1,NTRK1,SPRED1,TNFRSF10B,DUSP6,VARS,LARS,PHF19,PKD1,PDPK1,SSH1,CDK5RAP3,C2CD3,PABPC1,UBR5,WNK1,GATA2 | 1.399182604 | 5.28E-06 |
| GO:0030055 | cell-substrate junction | cellular_component | LPP,EPHX2,ACTR3,VASP,SIKE1,AFAP1,TLN2,FLII,NEXN,ARPC2,TENC1,PXN,TNS1,ITGB5,PTPRC,PAK1,TGFB1I1,EZR,NOX4,ARHGEF7,ITGA5,TLN1,LIMS2,LUC7L3,PDPK1,GAK | 2.562158606 | 7.71E-06 |
| GO:0032991 | macromolecular complex | cellular_component | CDK14,RNASEH2B,CRBN,OBFC1,PBX2,EIF2B4,GTF3C2,PSMB10,XRN1,LAMB1,TNRC6A,MYO1D,SIRT2,UTRN,PPIL2,NLRP1,SEPT5,GAS8,CDK13,SPOP,CBX5,SART1,SUPT5H,SUPT20H,HLA-DPB1,UBXN1,TBX2,MMS19,CNTF,GPAA1,RBM17,NUP98,EED,FMR1,SMAD7,HDAC6,ATP6V1D,DYNC1I1,RNH1,TTLL3,ARPC4-TTLL3,LEF1,HLA-C,SUPT4H1,PSMB9,ITGA9,BCL2L11,STARD9,COG4,SNRNP70,DDX23,HLA-DQA1,RAD23A,AP3S2,APITD1,UHMK1,USP47,ADAM8,MAP7D1,CAPZB,DNAJC10,PCGF6,KRIT1,SKIV2L,PTPN6,SUGP1,EEF1A1,ACTR3,CSNK2A1,UPF3A,PRKACA,ANAPC4,DHX9,PIGS,PLK1,NUTF2,DNM1L,TXNL1,UPF1,HDGF,RC3H1,NUP210,SEPT4,MIB2,SLC11A2,EFTUD2,IL13RA1,CNP,PCGF1,VAMP7,DR1,CAMK2D,HLA-DMB,BBS1,PRPF3,TNK2,FLG,DCAF11,WAC,RARS,COPS7B,VTI1A,CAPRIN1,GTF3C1,PMS1,CELF1,SF3A2,TIMM23,PAF1,SHARPIN,TCHP,RNF8,SEC31A,MDM2,ANAPC16,PPM1F,TBP,DIS3L,YY1,INO80,PFDN5,CREB1,SRP9,RPRD1A,RPL27,AP4B1,ZEB1,PIH1D1,EIF4B,EMC3,ATG12,NUMA1,TPM4,RPL9,MED28,PHF15,RPS6KA5,G3BP1,NIPBL,DCAF8,PKD2,STRN4,HNRNPA3,LMNA,RSL1D1,MITF,ITGA3,RB1,PRMT5,GNAI1,PLEKHA2,STX16,TP53BP1,BLOC1S5,RNF168,PAFAH1B1,SENP2,PUM2,DNALI1,SUB1,NSA2,ARPC2,SYNE1,EPN2,DDX6,USP33,BICD1,MRPS7,PAN2,NRP1,CUL4A,RPL24,RPL37A,VPS72,RUNX2,IQGAP1,FBXW7,INTS4,SMARCD3,IKBKB,RQCD1,PXN,KPNB1,NCOR1,PPP1R10,SMEK1,WASH4P,ITGB5,TCTN1,CACNB1,CLTCL1,DDX41,SRRM2,PBX3,HLA-F,N6AMT1,ABCA2,DENND4C,CDK5RAP2,PSMC6,TBCD,EMC4,SKIV2L2,DSN1,CDK6,WDR61,NUP37,PRPF8,APPL2,CLTB,FLOT1,PSMC4,HNRNPL,KIFC2,GOPC,RANBP9,WDR35,PHKG2,PARD6G,PAK1,RAB10,RHEB,HNRNPH3,ZSWIM7,TCF4,ACD,CSF1R,ATP6V0A1,ERC1,TIMM50,OS9,ACTR2,NFYC,PIWIL4,TMED3,SS18,SMAD4,FNTB,CHURC1-FNTB,KLC1,NAV1,INO80E,EZR,RPL4,CENPT,ING4,EIF3M,DNHD1,FIP1L1,DLST,MRPL49,FLNA,SUN2,MSL1,BCS1L,ACTR10,ATP5A1,GLI3,NDUFV1,DCAF6,NDUFS2,THOC2,VEZT,ENG,SCFD1,SIRT7,TCF12,ARNT,NOX4,GAPDH,ERCC1,PHF1,SLC25A6,SDHA,WWP1,ARHGEF7,PHF12,TBCE,NAT9,VAMP4,MED6,CIRBP,NUP85,HAUS5,ITGA5,CLIP2,NCBP2,VPS51,TGS1,DZIP1,NCAPD3,ELP6,CC2D2A,DIABLO,ENO4,MYO7B,RAP1B,CANX,SMARCA4,LMNB1,NAA16,LRPPRC,RPLP0,KIF13B,CRCP,DCAF17,KLHL7,PHC3,DNAJC21,GSK3A,SNRPE,ITGA11,POLG,MRPL3,NCOR2,KANSL3,PRPF4B,NARF,TROVE2,MYO1E,DYNC1I2,MAU2,PHF21A,PSMA1,CSNK1E,CACNB3,CLIC4,NSMCE4A,BNIP2,SHPRH,PHKG1,CACNA2D1,ATG3,SMAD9,HBB,TGFBR3,ZBTB16,BAZ2A,SPCS3,EIF3I,RRP8,PHF19,SEPT2,UQCRH,PKD1,USF1,FOXC1,KPNA1,PABPC1,PHC2,CLASP1,GATA2,PABPN1 | 1.21846194 | 8.12E-06 |
| GO:0005924 | cell-substrate adherens junction | cellular_component | LPP,EPHX2,VASP,SIKE1,AFAP1,TLN2,FLII,NEXN,ARPC2,TENC1,PXN,TNS1,ITGB5,PTPRC,PAK1,TGFB1I1,EZR,NOX4,ARHGEF7,ITGA5,TLN1,LIMS2,LUC7L3,PDPK1,GAK | 2.61069548 | 8.15E-06 |
| GO:0032268 | regulation of cellular protein metabolic process | biological_process | ACADVL,EIF2B4,PSMB10,IGF1R,TNRC6A,TRNAU1AP,NOC2L,RAF1,UBXN1,ZFP91,CNTF,EEF2K,VAPB,FMR1,SMAD7,USP4,HDAC6,PSMB9,RBPMS,XBP1,RAD23A,APITD1,UHMK1,ADAM8,DNAJC10,PTPN6,IGBP1,UPF3A,NOD1,PRKACA,ANAPC4,PLK1,ASNS,UPF1,HDGF,CCNL1,SEPT4,SYMPK,FAM58A,CLN8,GIGYF2,TNK2,WAC,STK4,ZNF540,FGFR1,PAIP1,CAPRIN1,ADCY4,CELF1,TAB2,RNF8,SEC31A,MDM2,FKBP1A,PPM1F,NPTN,SRP9,CCNL2,RHBDF1,NF1,EIF4B,NUB1,RPS6KA5,NIPBL,PKD2,LMNA,RB1,MAPK8IP3,RNF168,SENP2,PUM2,TPP1,SH3BP5,RGS3,NR1H3,FLCN,NRP1,PTEN,IQGAP1,FBXW7,HERPUD1,PXN,NCOR1,FECH,PRKRIP1,MAPK8,CSK,PTPRC,PSMC6,WDR61,PSMC4,PAK1,NCK2,SEMA4D,CSF1R,C3,PIWIL4,SMAD4,CDC14B,AK5,ENG,ARNT,NOX4,GAPDH,PHF1,PDIA5,MDFI,CIRBP,ITGA5,RGS2,NCBP2,PDGFRB,CARD14,TNFRSF14,MKNK2,YIF1A,TLN1,GSK3A,TWF1,IGF2,PSTK,PDCD4,CRIPAK,PSMA1,CSNK1E,CDK5RAP1,NTRK1,SPRED1,TNFRSF10B,DUSP6,VARS,LARS,PHF19,PKD1,PDPK1,SSH1,CDK5RAP3,PABPC1,UBR5,WNK1,GATA2 | 1.420277516 | 8.29E-06 |
| GO:0005593 | FACIT collagen | cellular_component | COL9A1,COL16A1,COL14A1,COL12A1,COL9A3 | 11.66110648 | 1.04E-05 |
| GO:0044248 | cellular catabolic process | biological_process | USP10,RNASEH2B,CRBN,RAB3GAP2,DHX34,ACADVL,EIF2B4,PSMB10,XRN1,MYO1D,SIRT2,EPHX2,RALGAPA2,SEPT5,ATP2B1,SPOP,RAB34,SUPT5H,SUPT20H,UBXN1,BCL6,ENOSF1,GBP3,AMT,SMPD4,SMAD7,MCF2L,USP4,HDAC6,ARHGEF12,ATP6V1D,RNH1,DERL2,PNKP,GLS,PSMB9,ARHGEF25,RGL4,STARD13,ABCC1,DDX23,RAD23A,USP47,ADAM8,DNAJC10,RAB35,RANBP1,SIPA1L1,DDX39A,KRIT1,SKIV2L,MINK1,RHOF,EEF1A1,UPF3A,PRKACA,ANAPC4,DHX9,PLK1,PDE7B,TBC1D2B,DNM1L,UPF1,RC3H1,NPC1,HERC2,CHD6,ZC3H12A,TBC1D10B,SEPT4,EFTUD2,RAB24,ATG4B,CNP,CLN8,GCDH,TBC1D14,TNK2,USP20,GIT2,WAC,MTG1,RAB18,PAIP1,PMS1,PDE4D,RNASET2,PLEKHG4,CPT1B,RNF8,MDM2,RHBDD1,DIS3L,FAM13A,INO80,RALGPS2,NAGK,PLEKHG5,DDX58,ALDH6A1,RPL27,SNX13,RHBDF1,NF1,ACAA1,EIF4B,NUB1,ATG12,RTKN,RPL9,G3BP1,RAB31,GALT,USP24,GNAI1,USP3,RNF168,PAFAH1B1,RNF217,TPP1,PDE8A,DDX6,ACAP2,USP33,LYSMD4,RGS3,CYTH2,PAN2,HEXA,USP7,CUL4A,CHFR,RPL24,ARHGAP9,RPL37A,PTEN,IQGAP1,FBXW7,HERPUD1,RQCD1,KPNB1,SRGAP2,NCOR1,ATP11B,OXCT1,PARN,USP15,DDX41,RNF213,ABCA2,DENND4C,MAP4K4,ITPA,PSMC6,TBCD,RNF146,SKIV2L2,PSMC4,ARHGAP29,SGSM3,GOPC,PHKG2,RHEB,CTSH,SEMA4D,GNB3,OS9,ALDH3B1,HSD17B4,GRPEL2,TBC1D22A,TGFB1I1,DDAH1,RPL4,USP54,DLST,RAB5A,ATP5A1,TMED2,THNSL2,RASGRF2,ARNT,ERCC1,NRBP2,WWP1,ATP8B2,ARHGEF7,ASAP1,UBA6,RGS2,NCBP2,VPS51,RAD51B,MAN1B1,FARP1,RAP1B,SMARCA4,USP40,RPLP0,DHX40,DOCK8,LONRF3,GSK3A,ATG4A,MYO1E,ATXN3,ATG16L2,AMFR,RGL2,CHD2,LONP2,PSMA1,ACIN1,PSD3,CSNK1E,BNIP2,NTRK1,ATG3,HBB,DHX37,TSG101,KPNA1,DDAH2,ACAN,RAPGEF6,FMOD,PABPC1,UBR5,SMARCAD1,DENND6B | 1.29274321 | 1.12E-05 |
| GO:0006139 | nucleobase-containing compound metabolic process | biological_process | FZD6,USP10,RNASEH2B,CRBN,OBFC1,RAB3GAP2,PBX2,DHX34,KANK2,ACADVL,EIF2B4,GTF3C2,RAI1,PSMB10,XRN1,IGF1R,MYO1D,SIRT2,RALGAPA2,MYNN,NOC2L,TARS,RAF1,ZNF131,SEPT5,RSC1A1,SFSWAP,CDK13,RBM6,SIN3B,ATP2B1,CBX5,SART1,RAB34,SUPT5H,SUPT20H,PWP1,BCL6,FUBP1,ZNF783,CMPK2,TBX2,MMS19,GBP3,VAPB,CUX1,RBM17,CLNS1A,NUP98,EED,SMAD7,MCF2L,PPFIBP2,HDAC6,ARHGEF12,EHMT1,ATP6V1D,RNH1,ZNF496,TYW1B,NARS,LANCL2,H6PD,PNKP,LEF1,PAX8,SUPT4H1,ZNF83,PSMB9,EMX2,ARHGEF25,RGL4,RBPMS,STARD13,ZSCAN31,XBP1,PAM,ABCC1,NOM1,SNRNP70,DDX23,RAD23A,METTL3,APITD1,USP47,ADAM8,NOL3,POLR3E,GABPB1,PRPF40A,DNAJC10,RAB35,PCGF6,RANBP1,SIPA1L1,DDX39A,KRIT1,SKIV2L,MINK1,RHOF,SUGP1,EEF1A1,LHX4,CSNK2A1,IGBP1,UPF3A,NOD1,STAT2,RPP14,DHX9,PLK1,ZNF446,PDE7B,ASNS,TBC1D2B,DNM1L,PTGES2,UPF1,ZNF621,HDGF,FDXR,RC3H1,PPP5C,CCNL1,HERC2,CHD6,ZC3H12A,TBC1D10B,SEPT4,POLM,SYMPK,EFTUD2,FAM58A,CNP,TBX18,LBX2,PCGF1,DR1,BCLAF1,ZNF721,ZNF397,JHDM1D,ZNF710,TBC1D14,PRPF3,TNK2,GIT2,WAC,ZNF142,FUBP3,MTG1,RARS,ZNF540,FGFR1,RAB18,HSF4,PAIP1,GTF3C1,ERH,NADSYN1,PMS1,ADCY4,CELF1,PDE4D,RNASET2,SF3A2,PAF1,TAB2,SGK1,PLEKHG4,DPF2,NADK,RNF8,SEC31A,MDM2,ZFYVE26,PRKCH,PPM1F,ZNF595,TBP,DIS3L,YY1,FAM13A,INO80,GMEB2,PFDN5,CREB1,RALGPS2,FLII,PLEKHG5,RPRD1A,DDX58,ALDH6A1,RPL27,CCNL2,PTPRK,SNX13,NF1,ZEB1,EIF4B,IFITM3,ASCC2,RGMB,RTKN,EBF1,RPL9,MED28,NPR1,ZNF3,RPS6KA5,G3BP1,NIPBL,RAB31,ALKBH3,ADSL,BRD9,ZNF837,PKD2,HNRNPA3,RXRB,GALT,LMNA,MITF,NOL8,RB1,PRMT5,GNAI1,USP3,MZF1,ZFPM2,TP53BP1,RNF168,PAFAH1B1,ZNF865,SENP2,TPP1,SUB1,CHMP1A,PDE8A,NSA2,DDX6,ACAP2,ZNF558,MUM1,ZNF263,ZNF180,BICD1,ZNF276,RGS3,NR1H3,GARS,CYTH2,PAN2,USP7,PLD6,FLCN,CUL4A,ZNF605,ZNF410,FMO2,GMDS,RPL24,ARHGAP9,RPL37A,SAP30BP,VPS72,PTEN,IDH1,SRPK1,RNASEK,RUNX2,CSTF1,IQGAP1,FBXW7,INTS4,SMARCD3,HERPUD1,IKBKB,CTNS,RQCD1,KPNB1,SRGAP2,RFX7,NCOR1,ATP11B,PPP1R10,MEF2A,PARN,SETD8,PIAS2,SSBP1,MAPK8,MYCBP2,USP15,DDX41,SRRM2,PBX3,RNF213,ZNF565,ABCA2,AFF4,TRIM28,DENND4C,DMTF1,MAP4K4,CDK5RAP2,ITPA,PTPRC,PSMC6,SWAP70,TBCD,IMPDH1,UBP1,SKIV2L2,WDR61,EBF4,PRPF8,FARSA,ZNF148,ZNF76,PSMC4,HNRNPL,ARHGAP29,SGSM3,STAG2,SP110,GOPC,PPA2,NCK2,RHEB,HNRNPH3,ZSWIM7,TCF4,ACD,IKZF5,HMGN2,WDR4,SEMA4D,GNB3,SSBP2,ERC1,NFYC,PIWIL4,RPUSD4,SRSF10,SS18,RCOR3,SMAD4,GRPEL2,CHURC1,CHURC1-FNTB,TBC1D22A,ZNF114,MIER2,TGFB1I1,INO80E,DTYMK,RPL4,ZNF44,CREBZF,ING4,RBMS1,ZNF687,CDC14B,CLK3,SLC23A2,NR2C2,FHOD1,FIP1L1,DNTTIP2,FLNA,RAB5A,IRF9,ATP5A1,GLI3,TMED2,MAPK12,CCDC59,DCAF6,RASGRF2,AK5,THOC2,ENG,SIRT7,ZSCAN5A,TCF12,ARNT,NOX4,ZNF692,ERCC1,PHF1,STK36,WWP1,ATP8B2,ARHGEF7,PHF12,PDIA5,ASAP1,REXO2,MED6,MDFI,ZNF554,IDH3B,NAA10,CIZ1,RGS2,HINFP,NCBP2,MLX,PDGFRB,TGS1,NCAPD3,RAD51B,CDK11A,GLIS3,ELP6,BDP1,FARP1,DBF4,RAP1B,RUNX1,SMARCA4,NAA16,LRPPRC,YIF1A,RPLP0,DHX40,RAD54L2,CLASRP,ZNF518B,CRCP,CLK4,ZNF90,ZNF638,PER3,TLN1,DOCK8,CHTF8,LONRF3,GSK3A,SNRPE,POLG,ZNF383,POLR2J3,NCOR2,FPGS,SETD2,PRPF4B,IGF2,PTGIS,FTSJ3,TROVE2,MYO1E,ATXN3,PSTK,PHF21A,PDCD4,SOX13,ERI3,RGL2,CHD2,LONP2,PSMA1,STAT6,CARS2,ACIN1,PSD3,CSNK1E,SON,ZNF138,ZNF705A,CDK5RAP1,NSMCE4A,BNIP2,NTRK1,TFAM,SHPRH,BRWD1,SMAD9,TGFBR3,ZFC3H1,ZBTB16,BAZ2A,UCK1,RRP8,VARS,LARS,PHF19,LMCD1,DHX37,LUC7L3,PKD1,PDPK1,TSG101,USF1,FOXC1,ARL6IP4,KPNA1,HEMK1,CDK5RAP3,RAPGEF6 | 1.153509672 | 1.18E-05 |
| GO:0005925 | focal adhesion | cellular_component | LPP,EPHX2,VASP,SIKE1,AFAP1,TLN2,FLII,ARPC2,TENC1,PXN,TNS1,ITGB5,PTPRC,PAK1,TGFB1I1,EZR,NOX4,ARHGEF7,ITGA5,TLN1,LIMS2,LUC7L3,PDPK1,GAK | 2.603409818 | 1.29E-05 |
| GO:1901575 | organic substance catabolic process | biological_process | USP10,RNASEH2B,CRBN,RAB3GAP2,DHX34,ACADVL,EIF2B4,PSMB10,XRN1,GK5,MYO1D,SIRT2,EPHX2,RALGAPA2,SEPT5,ATP2B1,SPOP,PLCD1,RAB34,UBXN1,BCL6,ENOSF1,GBP3,PLD1,AMT,SMPD4,SMAD7,MCF2L,USP4,HDAC6,ARHGEF12,ATP6V1D,RNH1,HGS,DERL2,H6PD,PNKP,GLS,PSMB9,ARHGEF25,RGL4,STARD13,ABCC1,DDX23,RAD23A,USP47,ADAM8,DNAJC10,RAB35,RANBP1,SIPA1L1,DDX39A,KRIT1,SKIV2L,MINK1,RHOF,EEF1A1,CSNK2A1,UPF3A,PRKACA,ANAPC4,DHX9,PLK1,PDE7B,TBC1D2B,DNM1L,UPF1,RC3H1,HERC2,CHD6,TBC1D10B,SEPT4,EFTUD2,CNP,CLN8,GCDH,PLCB4,TBC1D14,TNK2,USP20,GIT2,WAC,MTG1,RAB18,PAIP1,PMS1,PDE4D,RNASET2,PLEKHG4,CPT1B,RNF8,MDM2,RHBDD1,DIS3L,FAM13A,INO80,RALGPS2,NAGK,PLEKHG5,DDX58,ALDH6A1,RPL27,SNX13,RHBDF1,NF1,ACAA1,EIF4B,NUB1,RTKN,RPL9,G3BP1,RAB31,GALT,USP24,GNAI1,USP3,RNF168,PAFAH1B1,RNF217,TPP1,PDE8A,DDX6,ACAP2,USP33,RGS3,CYTH2,PAN2,HEXA,USP7,PLD6,CUL4A,CHFR,RPL24,ARHGAP9,RPL37A,PTEN,FYN,IQGAP1,FBXW7,HERPUD1,RQCD1,SNX17,KPNB1,SRGAP2,NCOR1,ATP11B,OXCT1,PARN,USP15,DDX41,RNF213,ABCA2,DENND4C,MAP4K4,ITPA,PSMC6,TBCD,RNF146,SKIV2L2,DDHD2,PSMC4,ARHGAP29,SGSM3,GOPC,PHKG2,RHEB,CTSH,SEMA4D,GNB3,OS9,ALDH3B1,HSD17B4,FUT4,SMAD4,GRPEL2,TBC1D22A,TGFB1I1,DDAH1,RPL4,USP54,DLST,FLNA,RAB5A,HGSNAT,ATP5A1,TMED2,THNSL2,RASGRF2,GUSB,ARNT,GAPDH,ERCC1,GAA,WWP1,ATP8B2,ARHGEF7,ASAP1,UBA6,RGS2,NCBP2,LPCAT1,RAD51B,MAN1B1,ENO4,FARP1,RAP1B,SMARCA4,USP40,RPLP0,DHX40,DOCK8,LONRF3,GSK3A,MYO1E,ATXN3,AMFR,PGM2,RGL2,CHD2,LONP2,PSMA1,ACIN1,PSD3,CSNK1E,CTBS,BNIP2,NTRK1,PHKG1,ABHD4,DHX37,TSG101,KPNA1,DDAH2,ACAN,RAPGEF6,FMOD,PABPC1,RBKS,UBR5,SMARCAD1,DENND6B,PLA2G16 | 1.279582835 | 1.30E-05 |
| GO:0043168 | anion binding | molecular_function | CDK14,PLEKHA3,DHX34,ACADVL,EIF2B4,CKB,IGF1R,GK5,MYO1D,SIRT2,TARS,RAF1,NLRP1,SEPT5,LEPRE1,CDK13,ATP2B1,RAB34,ERCC6L2,CMPK2,GBP3,SHMT2,EEF2K,PGS1,MCF2L,ARHGEF12,VRK2,TYW1B,NARS,LANCL2,DGKA,PNKP,ARHGEF25,ADAMTS1,RGL4,STARD9,PAM,ABCC1,HSD17B12,DDX23,MARK4,UHMK1,RAB35,RANBP1,DDX39A,SKIV2L,MINK1,RHOF,EEF1A1,ACTR3,CSNK2A1,NOD1,PRKACA,DHX9,PLK1,PNPO,ASNS,DNM1L,UPF1,HDGF,FDXR,PDXK,RHOBTB1,HERC2,CHD6,SEPT4,EFTUD2,AAMP,RAB24,GCDH,CAMK2D,GALK2,TNK2,STK4,MTG1,RARS,ALDH18A1,FGFR1,RAB18,NADSYN1,PMS1,ADCY4,PDE4D,SGK1,PLEKHG4,CHKB,NADK,PRKCH,IDH3G,INO80,THBS3,RALGPS2,NAGK,PLEKHG5,DDX58,ALDH6A1,MAGI1,NEK3,RTKN,NPR1,RPS6KA5,G3BP1,RAB31,ALKBH3,NTPCR,UBE2Q1,GNAI1,PLEKHA2,MARK3,PAFAH1B1,SLFN11,ACBD4,SYTL2,AACS,STK38L,DDX6,GARS,CYTH2,PLK2,NRP1,FMO2,GMDS,MAST2,FYN,ALDH1A3,SRPK1,RUNX2,IKBKB,PTPRF,ATP11B,ERAL1,STK19,MAPK8,MYLK,DDX41,RNF213,ABCA2,RAB8A,DENND4C,MAP4K4,CSK,PTPRC,PSMC6,SWAP70,SKIV2L2,CDK6,ABI3BP,FARSA,PSMC4,KIFC2,OGFOD3,UBA2,AAK1,PHKG2,PAK1,RAB10,RHEB,TRPM7,CSF1R,DGKZ,ACTR2,DDAH1,DTYMK,MTRR,CLK3,LRPAP1,RAB5A,BCS1L,ATP5A1,THNSL2,NDUFV1,MAPK12,RASGRF2,AK5,SIRT7,NOX4,ETFA,NRBP2,STK36,SDHA,ATP8B2,ARHGEF7,UBA6,NUBP1,PDGFRB,RAD51B,CDK11A,MYO7B,FARP1,RAP1B,RUNX1,MKNK2,SMARCA4,DHX40,RAD54L2,KIF13B,CLK4,FGF14,DOCK8,ADRBK2,GSK3A,SIK3,FPGS,TWF1,PRPF4B,COL13A1,WDFY3,MYO1E,D2HGDH,PSTK,GPHN,ARL15,RGL2,CHD2,RABL3,LONP2,CARS2,PSD3,CSNK1E,NTRK1,SHPRH,PHKG1,TGFBR3,SIRT3,PLOD2,UCK1,VARS,LARS,DHX37,SEPT2,PDPK1,DDAH2,STK24,RAPGEF6,GAK,MTO1,RBKS,PANK3,FASTK,SMARCAD1,WNK1,DENND6B | 1.276811176 | 1.41E-05 |
| GO:0015630 | microtubule cytoskeleton | cellular_component | SIRT2,GAS8,MMS19,SHMT2,HDAC6,DYNC1I1,SYTL4,TTLL3,BCL2L11,STARD9,CEP135,MARK4,MAP7D1,RANBP1,PRKACA,DHX9,PLK1,SDCCAG8,NUTF2,TTC19,DNM1L,HERC2,CNP,CCDC14,PDE4D,DPF2,TCHP,KIAA0586,ZFYVE26,DIS3L,INO80,FLII,NUMA1,PKD2,PPP2R3C,RB1,GNAI1,PAFAH1B1,DNALI1,CHMP1A,ZNF263,BICD1,PLK2,MAST2,IQGAP1,CEP112,PXN,NCOR1,SMEK1,TCTN1,MYCBP2,CLTCL1,ABCA2,RAB8A,CSK,CDK5RAP2,TBCD,DDHD2,FLOT1,KIFC2,RANBP9,WDR35,EVC,SS18,SMAD4,FNTB,KLC1,NAV1,EZR,ZNF44,DNHD1,ACTR10,AK5,GAPDH,PHF1,TBCE,NUP85,HAUS5,CLIP2,DZIP1,CC2D2A,LRPPRC,YIF1A,KIF13B,PTPN23,TLN1,TTLL11,DYNC1I2,NUCB1,PSMA1,CLIC4,BNIP2,SEPT2,THAP6,C2CD3,CLASP1,CC2D1A | 1.532000896 | 1.43E-05 |
| GO:0031090 | organelle membrane | cellular_component | SLC25A37,ACADVL,RAF1,SLC16A3,TAZ,CPE,RAB34,HLA-DPB1,ST3GAL1,MARCH5,UBXN1,SHMT2,PLD1,VAPB,GPAA1,CUX1,PGS1,NUP98,SLC9B2,SMPD4,GLG1,ATP6V1D,VRK2,HGS,DERL2,IL15RA,SYTL4,HLA-C,BCL2L13,BCL2L11,XYLT1,STARD13,COG4,PAM,HSD17B12,HLA-DQA1,AP3S2,MPDU1,ADAM8,CD9,MARCH6,RNF24,ACTR3,PIGS,VPS52,LMAN2,TTC19,DNM1L,PTGES2,FDXR,PIGG,NPC1,SHISA5,HERC2,NUP210,SLC11A2,CNP,CLN8,PIGN,GCDH,VAMP7,CAMK2D,HLA-DMB,BBS1,TNK2,ALDH18A1,TPCN2,VTI1A,TIMM23,TAB2,SGK1,CPT1B,CYP2R1,SEC31A,MDM2,RHBDD1,FKBP1A,GPAT2,MCFD2,TTC1,SRP9,QSOX1,SNX13,RHBDF1,SNX21,IFITM3,EMC3,RAB31,ALG6,ST3GAL4,GCNT2,PKD2,GOLGA8B,GOLGA8A,MAPK8IP3,STX16,DHRS1,PAFAH1B1,SENP2,EDEM2,MTCH1,STARD3,CHMP1A,SYNE1,EPN2,GALNT2,PLD6,FMO2,UST,HERPUD1,CTNS,SNX17,KPNB1,SRGAP2,ATP11B,FECH,ERAL1,COX7A2L,WASH4P,TMEM189,NECAB3,CLSTN2,CLTCL1,MAN1A2,OSBPL3,HLA-F,ABCA2,RAB8A,SLC35D2,DENND4C,TMEM66,STX18,EMC4,COX14,APPL2,CLTB,GOPC,ST6GALNAC5,PAK1,EVC,NCK2,LEPROT,RAB10,VPS45,ATP6V0A1,ERC1,TIMM50,OS9,HSD17B4,ELOVL1,FUT4,TMED3,GRPEL2,SLC35A4,SLC39A7,MBOAT2,AUP1,GOLPH3,CDC14B,RAB5A,SUN2,HGSNAT,MGAT5,BCS1L,ATP5A1,TMED2,NDUFV1,NDUFS2,RASGRF2,MCOLN1,B4GALT4,SCFD1,PCSK7,NOX4,EXT1,GAA,B3GAT3,SLC25A6,SDHA,PDIA5,VAMP4,NUP85,STAM2,MAN2A2,LPCAT1,EBPL,MAN1B1,LETMD1,CANX,LMNB1,LRPPRC,YIF1A,RHBDF2,CD164,PAPPA-AS1,POLG,FPGS,SFXN3,PCYT1A,PIGO,PTGIS,ATXN3,CORO7,AMFR,SLC25A24,CLIC4,NTRK1,LMF1,SEC31B,SLC25A46,ZDHHC8,PLOD2,SPCS3,LETM1,SEPT2,UQCRH,CCZ1B,TSG101,SLC9A8,CD63,SCAMP1,ALG9,GORASP1,BCL2L2 | 1.295250174 | 1.47E-05 |
| GO:0046483 | heterocycle metabolic process | biological_process | FZD6,USP10,RNASEH2B,CRBN,OBFC1,RAB3GAP2,PBX2,DHX34,KANK2,ACADVL,EIF2B4,GTF3C2,RAI1,PSMB10,XRN1,IGF1R,PTS,MYO1D,SIRT2,RALGAPA2,MYNN,NOC2L,TARS,RAF1,ZNF131,SEPT5,RSC1A1,SFSWAP,CDK13,RBM6,SIN3B,ATP2B1,CBX5,SART1,RAB34,SUPT5H,SUPT20H,PWP1,BCL6,FUBP1,ZNF783,CMPK2,TBX2,MMS19,GBP3,SHMT2,VAPB,CUX1,RBM17,CLNS1A,NUP98,EED,SMAD7,MCF2L,PPFIBP2,HDAC6,ARHGEF12,EHMT1,ATP6V1D,RNH1,ZNF496,TYW1B,NARS,LANCL2,H6PD,PNKP,LEF1,PAX8,SUPT4H1,ZNF83,PSMB9,EMX2,ARHGEF25,RGL4,RBPMS,STARD13,ZSCAN31,XBP1,PAM,ABCC1,NOM1,SNRNP70,DDX23,RAD23A,METTL3,APITD1,USP47,ADAM8,NOL3,POLR3E,GABPB1,PRPF40A,DNAJC10,RAB35,PCGF6,RANBP1,SIPA1L1,DDX39A,KRIT1,SKIV2L,MINK1,RHOF,SUGP1,EEF1A1,LHX4,CSNK2A1,IGBP1,UPF3A,NOD1,STAT2,RPP14,DHX9,PLK1,ZNF446,PNPO,PDE7B,ASNS,TBC1D2B,DNM1L,PTGES2,UPF1,ZNF621,HDGF,FDXR,RC3H1,PPP5C,PDXK,CCNL1,HERC2,CHD6,ZC3H12A,TBC1D10B,SEPT4,POLM,SLC11A2,SYMPK,EFTUD2,FAM58A,CNP,TBX18,GCDH,LBX2,PCGF1,DR1,BCLAF1,ZNF721,ZNF397,JHDM1D,ZNF710,TBC1D14,PRPF3,TNK2,GIT2,WAC,ZNF142,FUBP3,MTG1,RARS,ZNF540,ALDH18A1,FGFR1,RAB18,HSF4,PAIP1,GTF3C1,ERH,NADSYN1,PMS1,ADCY4,CELF1,PDE4D,RNASET2,SF3A2,PAF1,TAB2,SGK1,PLEKHG4,DPF2,NADK,RNF8,SEC31A,MDM2,ZFYVE26,PRKCH,PPM1F,ZNF595,TBP,DIS3L,YY1,FAM13A,INO80,GMEB2,PFDN5,CREB1,RALGPS2,FLII,PLEKHG5,RPRD1A,DDX58,ALDH6A1,RPL27,CCNL2,PTPRK,SNX13,NF1,ZEB1,EIF4B,IFITM3,ASCC2,RGMB,RTKN,EBF1,RPL9,MED28,NPR1,ZNF3,RPS6KA5,G3BP1,NIPBL,RAB31,ALKBH3,ADSL,BRD9,ZNF837,PKD2,HNRNPA3,RXRB,GALT,LMNA,MITF,NOL8,RB1,PRMT5,GNAI1,USP3,MZF1,ZFPM2,TP53BP1,RNF168,PAFAH1B1,ZNF865,SENP2,TPP1,SUB1,CHMP1A,PDE8A,NSA2,DDX6,ACAP2,ZNF558,MUM1,ZNF263,ZNF180,BICD1,ZNF276,RGS3,NR1H3,GARS,CYTH2,PAN2,USP7,PLD6,FLCN,CUL4A,ZNF605,ZNF410,FMO2,GMDS,RPL24,ARHGAP9,RPL37A,SAP30BP,VPS72,PTEN,IDH1,SRPK1,RNASEK,RUNX2,CSTF1,IQGAP1,FBXW7,INTS4,SMARCD3,HERPUD1,IKBKB,CTNS,RQCD1,KPNB1,SRGAP2,RFX7,NCOR1,ATP11B,PPP1R10,MEF2A,PARN,FECH,SETD8,PIAS2,SSBP1,MAPK8,MYCBP2,USP15,DDX41,SRRM2,PBX3,RNF213,ZNF565,ABCA2,AFF4,TRIM28,DENND4C,DMTF1,MAP4K4,CDK5RAP2,ITPA,PTPRC,PSMC6,SWAP70,TBCD,IMPDH1,UBP1,SKIV2L2,WDR61,EBF4,PRPF8,FARSA,ZNF148,ZNF76,PSMC4,HNRNPL,ARHGAP29,SGSM3,STAG2,SP110,GOPC,PPA2,NCK2,RHEB,HNRNPH3,ZSWIM7,TCF4,ACD,IKZF5,HMGN2,WDR4,SEMA4D,GNB3,SSBP2,ERC1,NFYC,P4HB,PIWIL4,RPUSD4,SRSF10,SS18,RCOR3,SMAD4,GRPEL2,CHURC1,CHURC1-FNTB,TBC1D22A,ZNF114,MIER2,TGFB1I1,INO80E,DTYMK,RPL4,ZNF44,CREBZF,ING4,RBMS1,ZNF687,CDC14B,CLK3,SLC23A2,NR2C2,FHOD1,FIP1L1,DNTTIP2,FLNA,RAB5A,IRF9,ATP5A1,GLI3,TMED2,MAPK12,CCDC59,DCAF6,RASGRF2,AK5,THOC2,ENG,SIRT7,ZSCAN5A,TCF12,ARNT,NOX4,ZNF692,ERCC1,PHF1,STK36,WWP1,ATP8B2,ARHGEF7,PHF12,PDIA5,ASAP1,REXO2,MED6,MDFI,ZNF554,IDH3B,NAA10,CIZ1,RGS2,HINFP,NCBP2,MLX,PDGFRB,TGS1,NCAPD3,RAD51B,CDK11A,GLIS3,ELP6,BDP1,FARP1,DBF4,RAP1B,RUNX1,SMARCA4,NAA16,LRPPRC,YIF1A,RPLP0,DHX40,RAD54L2,CLASRP,ZNF518B,CRCP,CLK4,ZNF90,ZNF638,PER3,TLN1,DOCK8,CHTF8,LONRF3,GSK3A,SNRPE,POLG,ZNF383,POLR2J3,NCOR2,FPGS,SETD2,PRPF4B,IGF2,PTGIS,FTSJ3,TROVE2,MYO1E,ATXN3,PSTK,PHF21A,GPHN,PDCD4,SOX13,ERI3,RGL2,CHD2,LONP2,PSMA1,STAT6,CARS2,ACIN1,PSD3,CSNK1E,SON,ZNF138,ZNF705A,CDK5RAP1,NSMCE4A,BNIP2,NTRK1,TFAM,SHPRH,BRWD1,SMAD9,TGFBR3,ZFC3H1,ZBTB16,BAZ2A,UCK1,RRP8,VARS,LARS,PHF19,LMCD1,DHX37,LUC7L3 | 1.147448876 | 1.69E-05 |
| GO:0009057 | macromolecule catabolic process | biological_process | USP10,RNASEH2B,CRBN,PSMB10,XRN1,SIRT2,SPOP,UBXN1,SMAD7,USP4,HDAC6,RNH1,HGS,DERL2,PNKP,PSMB9,RAD23A,USP47,ADAM8,DNAJC10,CSNK2A1,UPF3A,PRKACA,ANAPC4,PLK1,UPF1,RC3H1,HERC2,CLN8,USP20,WAC,PAIP1,RNASET2,RNF8,MDM2,RHBDD1,DIS3L,RPL27,RHBDF1,EIF4B,NUB1,RPL9,USP24,USP3,RNF168,RNF217,TPP1,DDX6,USP33,PAN2,HEXA,USP7,CUL4A,CHFR,RPL24,RPL37A,PTEN,FYN,FBXW7,HERPUD1,RQCD1,KPNB1,PARN,USP15,PSMC6,RNF146,PSMC4,SGSM3,PHKG2,OS9,SMAD4,TGFB1I1,RPL4,USP54,FLNA,HGSNAT,GUSB,ERCC1,GAA,WWP1,UBA6,NCBP2,LPCAT1,MAN1B1,USP40,RPLP0,GSK3A,ATXN3,AMFR,PGM2,LONP2,PSMA1,CSNK1E,CTBS,PHKG1,TSG101,KPNA1,ACAN,FMOD,PABPC1,UBR5,SMARCAD1 | 1.50351041 | 1.78E-05 |
| GO:1901360 | organic cyclic compound metabolic process | biological_process | FZD6,USP10,RNASEH2B,CRBN,OBFC1,RAB3GAP2,PBX2,DHX34,KANK2,ACADVL,EIF2B4,GTF3C2,RAI1,PSMB10,XRN1,IGF1R,PTS,MYO1D,SIRT2,EPHX2,RALGAPA2,MYNN,NOC2L,TARS,RAF1,ZNF131,SEPT5,RSC1A1,SFSWAP,CDK13,RBM6,SIN3B,ATP2B1,CBX5,SART1,RAB34,SUPT5H,SUPT20H,PWP1,BCL6,FUBP1,ZNF783,CMPK2,TBX2,MMS19,GBP3,SHMT2,VAPB,CUX1,RBM17,CLNS1A,NUP98,EED,SMAD7,MCF2L,PPFIBP2,HDAC6,ARHGEF12,EHMT1,ATP6V1D,RNH1,ZNF496,TYW1B,NARS,LANCL2,H6PD,PNKP,LEF1,PAX8,SUPT4H1,ZNF83,PSMB9,EMX2,ARHGEF25,RGL4,RBPMS,STARD13,ZSCAN31,XBP1,FDPS,PAM,ABCC1,NOM1,SNRNP70,HSD17B12,DDX23,RAD23A,METTL3,APITD1,USP47,ADAM8,NOL3,POLR3E,GABPB1,PRPF40A,DNAJC10,RAB35,PCGF6,RANBP1,SIPA1L1,DDX39A,KRIT1,SKIV2L,MINK1,RHOF,SUGP1,EEF1A1,LHX4,CSNK2A1,IGBP1,UPF3A,NOD1,STAT2,RPP14,DHX9,PLK1,ZNF446,PNPO,PDE7B,ASNS,TBC1D2B,DNM1L,PTGES2,UPF1,ZNF621,HDGF,FDXR,RC3H1,PPP5C,PDXK,NPC1,CCNL1,HERC2,CHD6,ZC3H12A,TBC1D10B,SEPT4,POLM,SLC11A2,SYMPK,EFTUD2,FAM58A,CNP,CLN8,TBX18,GCDH,LBX2,PCGF1,DR1,BCLAF1,ZNF721,ZNF397,JHDM1D,ZNF710,TBC1D14,PRPF3,TNK2,GIT2,WAC,ZNF142,FUBP3,MTG1,RARS,ZNF540,ALDH18A1,FGFR1,RAB18,HSF4,PAIP1,GTF3C1,ERH,NADSYN1,PMS1,ADCY4,CELF1,SNCAIP,PDE4D,RNASET2,SF3A2,PAF1,TAB2,SGK1,PLEKHG4,DPF2,NADK,IDI1,RNF8,CYP2R1,SEC31A,MDM2,ZFYVE26,PRKCH,PPM1F,ZNF595,TBP,DIS3L,YY1,FAM13A,INO80,GMEB2,PFDN5,CREB1,RALGPS2,FLII,PLEKHG5,RPRD1A,DDX58,ALDH6A1,RPL27,CCNL2,PTPRK,SNX13,NF1,ZEB1,ACAA1,EIF4B,IFITM3,ASCC2,RGMB,RTKN,EBF1,RPL9,MED28,NPR1,ZNF3,RPS6KA5,G3BP1,NIPBL,RAB31,ALKBH3,ADSL,BRD9,ZNF837,PKD2,HNRNPA3,RXRB,GALT,LMNA,MITF,NOL8,RB1,PRMT5,GNAI1,USP3,MZF1,ZFPM2,TP53BP1,RNF168,PAFAH1B1,ZNF865,SENP2,STARD3,TPP1,SUB1,CHMP1A,PDE8A,NSA2,DDX6,ACAP2,ZNF558,MUM1,ZNF263,ZNF180,BICD1,ZNF276,RGS3,NR1H3,GARS,CYTH2,PAN2,USP7,PLD6,FLCN,CUL4A,ZNF605,ZNF410,FMO2,GMDS,RPL24,ARHGAP9,RPL37A,SAP30BP,VPS72,PTEN,IDH1,SRPK1,RNASEK,RUNX2,CSTF1,IQGAP1,FBXW7,INTS4,LGMN,SMARCD3,HERPUD1,IKBKB,CTNS,RQCD1,SNX17,KPNB1,SRGAP2,RFX7,NCOR1,ATP11B,PPP1R10,MEF2A,PARN,FECH,SETD8,PIAS2,SSBP1,MAPK8,MYCBP2,USP15,DDX41,SRRM2,PBX3,RNF213,ZNF565,ABCA2,AFF4,TRIM28,DENND4C,DMTF1,MAP4K4,CDK5RAP2,ITPA,PTPRC,PSMC6,SWAP70,TBCD,IMPDH1,UBP1,SKIV2L2,WDR61,EBF4,PRPF8,FARSA,ZNF148,ZNF76,PSMC4,HNRNPL,ARHGAP29,SGSM3,STAG2,SP110,GOPC,PPA2,NCK2,LEPR,RHEB,HNRNPH3,ZSWIM7,TCF4,ACD,IKZF5,HMGN2,WDR4,SEMA4D,GNB3,SSBP2,ERC1,NFYC,P4HB,HSD17B4,PIWIL4,RPUSD4,SRSF10,SS18,RCOR3,SMAD4,GRPEL2,CHURC1,CHURC1-FNTB,TBC1D22A,ZNF114,MIER2,TGFB1I1,INO80E,DTYMK,RPL4,ZNF44,CREBZF,ING4,RBMS1,ZNF687,CDC14B,CLK3,SLC23A2,NR2C2,FHOD1,FIP1L1,DNTTIP2,FLNA,RAB5A,IRF9,ATP5A1,GLI3,TMED2,MAPK12,CCDC59,DCAF6,RASGRF2,AK5,THOC2,ENG,SIRT7,ZSCAN5A,TCF12,ARNT,NOX4,ZNF692,ERCC1,PHF1,STK36,WWP1,ATP8B2,ARHGEF7,PHF12,PDIA5,ASAP1,REXO2,MED6,MDFI,ZNF554,IDH3B,NAA10,CIZ1,RGS2,HINFP,NCBP2,MLX,PDGFRB,EBPL,TGS1,NCAPD3,RAD51B,CDK11A,GLIS3,ELP6,BDP1,FARP1,DBF4,RAP1B,RUNX1,SMARCA4,NAA16,LRPPRC,YIF1A,RPLP0,DHX40,RAD54L2,CLASRP,ZNF518B,CRCP,CLK4,ZNF90,ZNF638,PER3,TLN1,DOCK8,CHTF8,LONRF3,GSK3A,SNRPE,POLG,ZNF383,POLR2J3,NCOR2,FPGS,SETD2,PRPF4B,IGF2,PTGIS,FTSJ3,TROVE2,MYO1E,ATXN3,PSTK,PHF21A,GPHN,PDCD4,SOX13,ERI3,RGL2,CHD2,LONP2,PSMA1,STAT6,CARS2,ACIN1,PSD3,CSNK1E,SON,ZNF138,ZNF705A,CDK5RAP1,NSMCE4A,BNIP2,NTRK1,TFAM | 1.142540397 | 1.82E-05 |
| GO:0032553 | ribonucleotide binding | molecular_function | CDK14,DHX34,EIF2B4,CKB,IGF1R,GK5,MYO1D,TARS,RAF1,NLRP1,SEPT5,CDK13,ATP2B1,RAB34,ERCC6L2,CMPK2,GBP3,EEF2K,PGS1,MCF2L,ARHGEF12,VRK2,TYW1B,NARS,LANCL2,DGKA,PNKP,ARHGEF25,RGL4,STARD9,ABCC1,DDX23,MARK4,UHMK1,RAB35,RANBP1,DDX39A,SKIV2L,MINK1,RHOF,EEF1A1,ACTR3,CSNK2A1,NOD1,PRKACA,DHX9,PLK1,PNPO,ASNS,DNM1L,UPF1,PDXK,RHOBTB1,HERC2,CHD6,SEPT4,EFTUD2,RAB24,CAMK2D,GALK2,TNK2,STK4,MTG1,RARS,ALDH18A1,FGFR1,RAB18,NADSYN1,PMS1,ADCY4,PDE4D,SGK1,PLEKHG4,CHKB,NADK,PRKCH,IDH3G,INO80,RALGPS2,NAGK,PLEKHG5,DDX58,MAGI1,NEK3,RTKN,NPR1,RPS6KA5,G3BP1,RAB31,NTPCR,UBE2Q1,GNAI1,MARK3,SLFN11,AACS,STK38L,DDX6,GARS,CYTH2,PLK2,MAST2,FYN,SRPK1,RUNX2,IKBKB,ATP11B,ERAL1,STK19,MAPK8,MYLK,DDX41,RNF213,ABCA2,RAB8A,DENND4C,MAP4K4,CSK,PSMC6,SWAP70,SKIV2L2,CDK6,FARSA,PSMC4,KIFC2,UBA2,AAK1,PHKG2,PAK1,RAB10,RHEB,TRPM7,CSF1R,DGKZ,ACTR2,DTYMK,MTRR,CLK3,RAB5A,BCS1L,ATP5A1,NDUFV1,MAPK12,RASGRF2,AK5,NRBP2,STK36,ATP8B2,ARHGEF7,UBA6,NUBP1,PDGFRB,RAD51B,CDK11A,MYO7B,FARP1,RAP1B,RUNX1,MKNK2,SMARCA4,DHX40,RAD54L2,KIF13B,CLK4,DOCK8,ADRBK2,GSK3A,SIK3,FPGS,TWF1,PRPF4B,MYO1E,PSTK,GPHN,ARL15,RGL2,CHD2,RABL3,LONP2,CARS2,PSD3,CSNK1E,NTRK1,SHPRH,PHKG1,UCK1,VARS,LARS,DHX37,SEPT2,PDPK1,STK24,RAPGEF6,GAK,RBKS,PANK3,FASTK,SMARCAD1,WNK1,DENND6B | 1.31242471 | 1.92E-05 |
| GO:0019899 | enzyme binding | molecular_function | FZD6,LAMB1,SIRT2,UTRN,RAF1,NLRP1,GAS8,SPOP,CBX5,SUPT5H,MARCH5,UBXN1,DPP4,PTPN22,VAPB,SMAD7,HDAC6,SYTL4,PAM,UHMK1,DNAJC10,RANBP1,MARCH6,PDLIM5,PTPN6,EEF1A1,IGBP1,PRKACA,ANAPC4,PLK1,DNM1L,CCNL1,HERC2,FAM58A,TBC1D14,WAC,STK11IP,TPCN2,SNCAIP,PDE4D,PAF1,RNF8,MDM2,PRKCH,DIS3L,CCNL2,PTPRK,RTKN,NPR1,NIPBL,PKD2,CASP2,STRN4,PPP1R21,RB1,MAPK8IP3,PAFAH1B1,SYTL2,BICD1,USP7,CUL4A,DAAM1,MAST2,FAP,PTEN,IQGAP1,IKBKB,PXN,SRGAP2,LTBR,NCOR1,MEF2A,DYM,PARN,PRKRIP1,MAPK8,RAB8A,TRIM28,CSK,CDK5RAP2,PTPRC,SGSM3,RANBP9,PAK1,RHEB,ACD,GNB3,ATP6V0A1,ERC1,OS9,TANK,LRPAP1,FLNA,GLI3,ARHGEF7,HINFP,TNFRSF14,RAP1B,LMNB1,RAD54L2,KIF13B,GSK3A,POLG,NCOR2,ATXN3,LONP2,ACIN1,CDK5RAP1,SPRED1,PHKG1,ATG3,PKD1,PDPK1,TSG101,USF1,CDK5RAP3,RAPGEF6,WNK1 | 1.447591295 | 2.16E-05 |
| GO:0070161 | anchoring junction | cellular_component | LPP,EPHX2,SMAD7,VASP,TNK2,SIKE1,AFAP1,TLN2,FLII,PTPRK,NEXN,ESAM,ARPC2,ADAM15,TENC1,PXN,TNS1,ITGB5,PTPRC,TBCD,PAK1,TGFB1I1,EZR,VEZT,NOX4,ARHGEF7,ITGA5,TLN1,MYO1E,LIMS2,LUC7L3,PDPK1,GAK | 2.137869521 | 2.73E-05 |
| GO:0017076 | purine nucleotide binding | molecular_function | CDK14,DHX34,EIF2B4,CKB,IGF1R,GK5,MYO1D,TARS,RAF1,NLRP1,SEPT5,CDK13,ATP2B1,RAB34,ERCC6L2,CMPK2,GBP3,EEF2K,PGS1,MCF2L,ARHGEF12,VRK2,NARS,LANCL2,DGKA,PNKP,ARHGEF25,RGL4,STARD9,ABCC1,DDX23,MARK4,UHMK1,RAB35,RANBP1,DDX39A,SKIV2L,MINK1,RHOF,EEF1A1,ACTR3,CSNK2A1,NOD1,PRKACA,DHX9,PLK1,ASNS,DNM1L,UPF1,PDXK,RHOBTB1,HERC2,CHD6,SEPT4,EFTUD2,RAB24,CAMK2D,GALK2,TNK2,STK4,MTG1,RARS,ALDH18A1,FGFR1,RAB18,NADSYN1,PMS1,ADCY4,PDE4D,SGK1,PLEKHG4,CHKB,NADK,PRKCH,IDH3G,INO80,RALGPS2,NAGK,PLEKHG5,DDX58,FAM114A2,MAGI1,NEK3,RTKN,NPR1,RPS6KA5,G3BP1,RAB31,NTPCR,UBE2Q1,GNAI1,MARK3,SLFN11,AACS,STK38L,DDX6,GARS,CYTH2,PLK2,MAST2,FYN,SRPK1,RUNX2,IKBKB,ATP11B,ERAL1,STK19,MAPK8,MYLK,DDX41,RNF213,ABCA2,RAB8A,DENND4C,MAP4K4,CSK,PSMC6,SWAP70,SKIV2L2,CDK6,FARSA,PSMC4,KIFC2,UBA2,AAK1,PHKG2,PAK1,RAB10,RHEB,TRPM7,CSF1R,DGKZ,ACTR2,GRPEL2,DTYMK,CLK3,RAB5A,BCS1L,ATP5A1,MAPK12,RASGRF2,AK5,NRBP2,STK36,ATP8B2,ARHGEF7,UBA6,NUBP1,PDGFRB,RAD51B,CDK11A,MYO7B,FARP1,RAP1B,RUNX1,MKNK2,SMARCA4,DHX40,RAD54L2,KIF13B,CLK4,DOCK8,ADRBK2,GSK3A,SIK3,FPGS,TWF1,PRPF4B,MYO1E,PSTK,GPHN,ARL15,RGL2,CHD2,RABL3,LONP2,CARS2,PSD3,CSNK1E,NTRK1,SHPRH,PHKG1,UCK1,VARS,LARS,DHX37,SEPT2,PDPK1,STK24,RAPGEF6,GAK,RBKS,PANK3,FASTK,SMARCAD1,WNK1,DENND6B | 1.30496924 | 3.03E-05 |
| GO:0006807 | nitrogen compound metabolic process | biological_process | FZD6,USP10,RNASEH2B,CRBN,OBFC1,RAB3GAP2,PBX2,DHX34,KANK2,ACADVL,EIF2B4,GTF3C2,RAI1,PSMB10,XRN1,CKB,IGF1R,PTS,MYO1D,SIRT2,RALGAPA2,MYNN,NOC2L,TARS,RAF1,ZNF131,SEPT5,RSC1A1,SFSWAP,CDK13,RBM6,SIN3B,ATP2B1,CBX5,SART1,RAB34,SUPT5H,SUPT20H,ST3GAL1,PWP1,BCL6,FUBP1,ZNF783,CMPK2,TBX2,ENOSF1,MMS19,GBP3,SHMT2,VAPB,CUX1,RBM17,CLNS1A,NUP98,EED,AMT,SMPD4,SMAD7,MCF2L,PPFIBP2,HDAC6,ARHGEF12,EHMT1,ATP6V1D,RNH1,ZNF496,TYW1B,NARS,LANCL2,H6PD,PNKP,LEF1,GLS,PAX8,SUPT4H1,ZNF83,PSMB9,EMX2,ARHGEF25,RGL4,RBPMS,XYLT1,STARD13,ZSCAN31,XBP1,PAM,ABCC1,NOM1,SNRNP70,DDX23,RAD23A,METTL3,APITD1,USP47,ADAM8,NOL3,POLR3E,GABPB1,PRPF40A,DNAJC10,RAB35,PCGF6,RANBP1,SIPA1L1,DDX39A,KRIT1,SKIV2L,MINK1,RHOF,SUGP1,EEF1A1,LHX4,CSNK2A1,IGBP1,UPF3A,NOD1,STAT2,RPP14,DHX9,PLK1,ZNF446,PNPO,PDE7B,ASNS,TBC1D2B,DNM1L,PTGES2,UPF1,ZNF621,HDGF,FDXR,RC3H1,PPP5C,PDXK,CCNL1,HERC2,CHD6,ZC3H12A,TBC1D10B,SEPT4,POLM,SLC11A2,SYMPK,EFTUD2,FAM58A,CNP,CLN8,TBX18,GCDH,LBX2,PCGF1,DR1,BCLAF1,ZNF721,ZNF397,JHDM1D,ZNF710,DNPEP,TBC1D14,PRPF3,TNK2,GIT2,WAC,ZNF142,FUBP3,MTG1,RARS,ZNF540,ALDH18A1,FGFR1,RAB18,HSF4,PAIP1,GTF3C1,ERH,NADSYN1,PMS1,ADCY4,CELF1,SNCAIP,PDE4D,RNASET2,SF3A2,PAF1,TAB2,SGK1,PLEKHG4,DPF2,CHKB,NADK,RNF8,SEC31A,MDM2,FKBP1A,ZFYVE26,PRKCH,PPM1F,ZNF595,TBP,DIS3L,YY1,FAM13A,INO80,GMEB2,PFDN5,CREB1,RALGPS2,FLII,PLEKHG5,RPRD1A,DDX58,ALDH6A1,RPL27,CCNL2,PTPRK,SNX13,NF1,ZEB1,EIF4B,IFITM3,ASCC2,RGMB,RTKN,EBF1,RPL9,MED28,NPR1,ZNF3,RPS6KA5,G3BP1,NIPBL,RAB31,ALKBH3,ADSL,ST3GAL4,BRD9,GCNT2,ZNF837,PKD2,HNRNPA3,RXRB,GALT,LMNA,MITF,NOL8,RB1,PRMT5,GNAI1,USP3,MZF1,ZFPM2,TP53BP1,RNF168,PAFAH1B1,ZNF865,SENP2,TPP1,SUB1,CHMP1A,PDE8A,NSA2,DDX6,ACAP2,ZNF558,MUM1,ZNF263,ZNF180,BICD1,ZNF276,RGS3,NR1H3,GARS,CYTH2,PAN2,HEXA,USP7,PLD6,FLCN,CUL4A,ZNF605,ZNF410,FMO2,GMDS,RPL24,ARHGAP9,UST,RPL37A,SAP30BP,VPS72,PTEN,IDH1,SRPK1,RNASEK,RUNX2,CSTF1,IQGAP1,FBXW7,INTS4,SMARCD3,HERPUD1,IKBKB,CTNS,RQCD1,KPNB1,SRGAP2,RFX7,NCOR1,ATP11B,PPP1R10,MEF2A,PARN,FECH,SETD8,PIAS2,SSBP1,MAPK8,MYCBP2,USP15,DDX41,SRRM2,PBX3,RNF213,ZNF565,ABCA2,AFF4,TRIM28,DENND4C,DMTF1,MAP4K4,CDK5RAP2,ITPA,PTPRC,OAZ1,PSMC6,SWAP70,TBCD,IMPDH1,UBP1,SKIV2L2,WDR61,EBF4,PRPF8,FARSA,ZNF148,ZNF76,PSMC4,HNRNPL,ARHGAP29,SGSM3,STAG2,SP110,GOPC,PPA2,ST6GALNAC5,NCK2,RHEB,HNRNPH3,CTSH,ZSWIM7,TCF4,ACD,IKZF5,HMGN2,WDR4,SEMA4D,GNB3,SSBP2,ERC1,NFYC,P4HB,ELOVL1,PIWIL4,RPUSD4,SRSF10,SS18,RCOR3,SMAD4,GRPEL2,CHURC1,CHURC1-FNTB,TBC1D22A,ZNF114,MIER2,TGFB1I1,DDAH1,INO80E,DTYMK,RPL4,MTRR,MBOAT2,ZNF44,CREBZF,ING4,RBMS1,ZNF687,CDC14B,CLK3,SLC23A2,NR2C2,FHOD1,FIP1L1,DLST,DNTTIP2,FLNA,RAB5A,IRF9,HGSNAT,ATP5A1,GLI3,TMED2,THNSL2,MAPK12,CCDC59,DCAF6,RASGRF2,AK5,GUSB,THOC2,B4GALT4,ENG,SIRT7,ZSCAN5A,TCF12,ARNT,NOX4,ZNF692,EXT1,ERCC1,PHF1,B3GAT3,STK36,WWP1,ATP8B2,ARHGEF7,PHF12,PDIA5,ASAP1,REXO2,MED6,MDFI,ZNF554,IDH3B,NAA10,CIZ1,RGS2,HINFP,NCBP2,LPCAT1,MLX,PDGFRB,TGS1,NCAPD3,RAD51B,CDK11A,GLIS3,ELP6,NIT1,BDP1,FARP1,DBF4,RAP1B,RUNX1,SMARCA4,NAA16,LRPPRC,YIF1A,RPLP0,DHX40,RAD54L2,CLASRP,ZNF518B,CRCP,CLK4,ZNF90,ZNF638,PER3,TLN1,DOCK8,CHTF8,LONRF3,GSK3A,SNRPE,POLG,ZNF383,POLR2J3,NCOR2,FPGS,SETD2,PCYT1A,PPAP2A,PRPF4B,IGF2,PTGIS,FTSJ3,TROVE2,MYO1E,ATXN3,PSTK,PHF21A,GPHN,PDCD4 | 1.131765457 | 3.06E-05 |
| GO:0034641 | cellular nitrogen compound metabolic process | biological_process | FZD6,USP10,RNASEH2B,CRBN,OBFC1,RAB3GAP2,PBX2,DHX34,KANK2,ACADVL,EIF2B4,GTF3C2,RAI1,PSMB10,XRN1,CKB,IGF1R,PTS,MYO1D,SIRT2,RALGAPA2,MYNN,NOC2L,TARS,RAF1,ZNF131,SEPT5,RSC1A1,SFSWAP,CDK13,RBM6,SIN3B,ATP2B1,CBX5,SART1,RAB34,SUPT5H,SUPT20H,PWP1,BCL6,FUBP1,ZNF783,CMPK2,TBX2,MMS19,GBP3,VAPB,CUX1,RBM17,CLNS1A,NUP98,EED,SMPD4,SMAD7,MCF2L,PPFIBP2,HDAC6,ARHGEF12,EHMT1,ATP6V1D,RNH1,ZNF496,TYW1B,NARS,LANCL2,H6PD,PNKP,LEF1,GLS,PAX8,SUPT4H1,ZNF83,PSMB9,EMX2,ARHGEF25,RGL4,RBPMS,STARD13,ZSCAN31,XBP1,PAM,ABCC1,NOM1,SNRNP70,DDX23,RAD23A,METTL3,APITD1,USP47,ADAM8,NOL3,POLR3E,GABPB1,PRPF40A,DNAJC10,RAB35,PCGF6,RANBP1,SIPA1L1,DDX39A,KRIT1,SKIV2L,MINK1,RHOF,SUGP1,EEF1A1,LHX4,CSNK2A1,IGBP1,UPF3A,NOD1,STAT2,RPP14,DHX9,PLK1,ZNF446,PNPO,PDE7B,ASNS,TBC1D2B,DNM1L,PTGES2,UPF1,ZNF621,HDGF,FDXR,RC3H1,PPP5C,PDXK,CCNL1,HERC2,CHD6,ZC3H12A,TBC1D10B,SEPT4,POLM,SLC11A2,SYMPK,EFTUD2,FAM58A,CNP,TBX18,GCDH,LBX2,PCGF1,DR1,BCLAF1,ZNF721,ZNF397,JHDM1D,ZNF710,DNPEP,TBC1D14,PRPF3,TNK2,GIT2,WAC,ZNF142,FUBP3,MTG1,RARS,ZNF540,ALDH18A1,FGFR1,RAB18,HSF4,PAIP1,GTF3C1,ERH,NADSYN1,PMS1,ADCY4,CELF1,PDE4D,RNASET2,SF3A2,PAF1,TAB2,SGK1,PLEKHG4,DPF2,CHKB,NADK,RNF8,SEC31A,MDM2,FKBP1A,ZFYVE26,PRKCH,PPM1F,ZNF595,TBP,DIS3L,YY1,FAM13A,INO80,GMEB2,PFDN5,CREB1,RALGPS2,FLII,PLEKHG5,RPRD1A,DDX58,ALDH6A1,RPL27,CCNL2,PTPRK,SNX13,NF1,ZEB1,EIF4B,IFITM3,ASCC2,RGMB,RTKN,EBF1,RPL9,MED28,NPR1,ZNF3,RPS6KA5,G3BP1,NIPBL,RAB31,ALKBH3,ADSL,BRD9,ZNF837,PKD2,HNRNPA3,RXRB,GALT,LMNA,MITF,NOL8,RB1,PRMT5,GNAI1,USP3,MZF1,ZFPM2,TP53BP1,RNF168,PAFAH1B1,ZNF865,SENP2,TPP1,SUB1,CHMP1A,PDE8A,NSA2,DDX6,ACAP2,ZNF558,MUM1,ZNF263,ZNF180,BICD1,ZNF276,RGS3,NR1H3,GARS,CYTH2,PAN2,USP7,PLD6,FLCN,CUL4A,ZNF605,ZNF410,FMO2,GMDS,RPL24,ARHGAP9,RPL37A,SAP30BP,VPS72,PTEN,IDH1,SRPK1,RNASEK,RUNX2,CSTF1,IQGAP1,FBXW7,INTS4,SMARCD3,HERPUD1,IKBKB,CTNS,RQCD1,KPNB1,SRGAP2,RFX7,NCOR1,ATP11B,PPP1R10,MEF2A,PARN,FECH,SETD8,PIAS2,SSBP1,MAPK8,MYCBP2,USP15,DDX41,SRRM2,PBX3,RNF213,ZNF565,ABCA2,AFF4,TRIM28,DENND4C,DMTF1,MAP4K4,CDK5RAP2,ITPA,PTPRC,OAZ1,PSMC6,SWAP70,TBCD,IMPDH1,UBP1,SKIV2L2,WDR61,EBF4,PRPF8,FARSA,ZNF148,ZNF76,PSMC4,HNRNPL,ARHGAP29,SGSM3,STAG2,SP110,GOPC,PPA2,NCK2,RHEB,HNRNPH3,CTSH,ZSWIM7,TCF4,ACD,IKZF5,HMGN2,WDR4,SEMA4D,GNB3,SSBP2,ERC1,NFYC,PIWIL4,RPUSD4,SRSF10,SS18,RCOR3,SMAD4,GRPEL2,CHURC1,CHURC1-FNTB,TBC1D22A,ZNF114,MIER2,TGFB1I1,DDAH1,INO80E,DTYMK,RPL4,MTRR,MBOAT2,ZNF44,CREBZF,ING4,RBMS1,ZNF687,CDC14B,CLK3,SLC23A2,NR2C2,FHOD1,FIP1L1,DLST,DNTTIP2,FLNA,RAB5A,IRF9,ATP5A1,GLI3,TMED2,MAPK12,CCDC59,DCAF6,RASGRF2,AK5,THOC2,ENG,SIRT7,ZSCAN5A,TCF12,ARNT,NOX4,ZNF692,ERCC1,PHF1,STK36,WWP1,ATP8B2,ARHGEF7,PHF12,PDIA5,ASAP1,REXO2,MED6,MDFI,ZNF554,IDH3B,NAA10,CIZ1,RGS2,HINFP,NCBP2,LPCAT1,MLX,PDGFRB,TGS1,NCAPD3,RAD51B,CDK11A,GLIS3,ELP6,BDP1,FARP1,DBF4,RAP1B,RUNX1,SMARCA4,NAA16,LRPPRC,YIF1A,RPLP0,DHX40,RAD54L2,CLASRP,ZNF518B,CRCP,CLK4,ZNF90,ZNF638,PER3,TLN1,DOCK8,CHTF8,LONRF3,GSK3A,SNRPE,POLG,ZNF383,POLR2J3,NCOR2,FPGS,SETD2,PCYT1A,PRPF4B,IGF2,PTGIS,FTSJ3,TROVE2,MYO1E,ATXN3,PSTK,PHF21A,PDCD4,SOX13,ERI3,RGL2,CHD2,LONP2,PSMA1,STAT6,CARS2,ACIN1,PSD3,CSNK1E,SON,ZNF138,ZNF705A,CDK5RAP1,NSMCE4A,BNIP2,NTRK1,TFAM,SHPRH,BRWD1,SMAD9,HBB | 1.137726631 | 3.20E-05 |
| GO:0033036 | macromolecule localization | biological_process | RAB3GAP2,CADM1,RALGAPA2,BTN3A1,NLRP1,GAS8,CPE,CCDC91,RAB34,MARCH5,BCL6,GPAA1,NUP98,FMR1,SMAD7,USP4,HDAC6,ATP6V1D,HGS,DERL2,SYTL4,RBPMS,COG4,PAM,AP3S2,UHMK1,ADAM8,RAB35,DDX39A,KPNA6,UPF3A,PRKACA,PLK1,VPS52,LMAN2,NUTF2,DNM1L,UPF1,NPC1,HERC2,ZC3H12A,NUP210,RAB24,ATG4B,CLN8,VAMP7,FYTTD1,BBS1,STK11IP,VTI1A,HPS4,RAB18,DISP1,TIMM23,CPT1B,SEC31A,MDM2,SNAP23,SFT2D2,YY1,TLN2,MCFD2,SRP9,DDX58,RPL27,LCP2,PTPRK,SNX13,AP4B1,RHBDF1,SNX21,NF1,RPL9,NIPBL,RAB31,PKD2,LMNA,RSL1D1,RB1,MAPK8IP3,STX16,PAFAH1B1,SENP2,STARD3,SYTL2,CHMP1A,SYNE1,BICD1,GCC2,NR1H3,HEXA,FLCN,RPL24,RPL37A,STX2,FBXW7,CEP112,SNX17,KPNB1,NCOR1,ATP11B,PPP1R10,NECAB3,CACNB1,MAPK8,MYCBP2,CLTCL1,OSBPL3,ABCA2,RAB8A,DENND4C,CSK,STX18,NUP37,CLTB,FLOT1,AAK1,GOPC,PAK1,LEPROT,RAB10,VPS45,ACD,CSF1R,ATP6V0A1,ERC1,TIMM50,OS9,C3,SRSF10,TMED3,SMAD4,GRPEL2,C1QTNF3,EZR,RPL4,APOL3,FLNA,RAB5A,SUN2,GLI3,TMED2,THOC2,MCOLN1,SCFD1,VTI1B,SLC25A6,ATP8B2,VAMP4,MDFI,NUP85,HINFP,STAM2,NCBP2,VPS51,CANX,RUNX1,LRPPRC,YIF1A,RPLP0,SDAD1,SNX27,KIF13B,RHBDF2,TLN1,NLGN2,TWF1,ATG4A,PDIA3,ATG16L2,SNX14,LONP2,CSNK1E,ATG3,LMF1,SEC31B,SPCS3,SEPT2,PKD1,PDPK1,TSG101,KPNA1,CD63,SCAMP1,UBR5,CLASP1,GORASP1,PABPN1 | 1.31440317 | 3.30E-05 |
| GO:0032989 | cellular component morphogenesis | biological_process | FZD6,CADM1,PSMB10,IGF1R,LAMB1,NPHP3,RAF1,COL9A1,BDNF,COL2A1,BCL6,SMAD7,ARHGEF12,CD72,TTLL3,LEF1,PAX8,ITGA9,ADAM8,CAPZB,PRPF40A,CD9,SIPA1L1,MINK1,PDLIM5,ACTR3,LHX4,VASP,CSNK2A1,DNM1L,SLC11A2,CNP,BBS1,STK4,FGFR1,CAPRIN1,KIAA0586,SSH2,CREB1,RGMB,COL18A1,RPS6KA5,RB1,MAPK8IP3,PAFAH1B1,ARPC2,ADAM15,USP33,HEXA,NRP1,PTEN,FYN,IFT172,SRGAP2,MEF2A,TCTN1,SSBP1,CACNB1,MYCBP2,RAB8A,TRIM28,COL9A3,PTPRC,FLOT1,RANBP9,WDR35,PAK1,NCK2,RAB10,SEMA6A,SEMA4D,CSF1R,ROBO3,SS18,SMAD4,TGFB1I1,EZR,FLNA,GLI3,NOX4,EXT1,STK36,TBCE,ASAP1,UNC5B,PTPRD,ITGA5,PDGFRB,DZIP1,CC2D2A,FARP1,SMARCA4,KIF13B,PTPN23,TLN1,TROVE2,ROBO2,CACNB3,PMP22,CLIC4,NTRK1,BRWD1,TGFBR3,TMEM237,SEPT2,FOXC1,STK24,SSH1,C2CD3,CLASP1,TENM4 | 1.453316042 | 3.33E-05 |
| GO:1901363 | heterocyclic compound binding | molecular_function | CDK14,OBFC1,PBX2,DHX34,ACADVL,EIF2B4,GTF3C2,XRN1,CKB,IGF1R,GK5,TNRC6A,MYO1D,SIRT2,MYNN,TRNAU1AP,TARS,RAF1,NLRP1,ZNF131,SEPT5,SFSWAP,CDK13,RBM6,ATP2B1,RAB34,ERCC6L2,BCL6,FUBP1,ZNF783,CMPK2,TBX2,GBP3,ZFP91,EEF2K,CUX1,PGS1,RBM17,SLC9B2,FMR1,SMAD7,MCF2L,PPFIBP2,ARHGEF12,VRK2,ZNF496,TYW1B,NARS,LANCL2,H6PD,DGKA,PNKP,LEF1,PAX8,ZNF83,EMX2,ARHGEF25,RGL4,RBPMS,ZSCAN31,STARD9,XBP1,ABCC1,NOM1,SNRNP70,HSD17B12,DDX23,RAD23A,METTL3,APITD1,MARK4,UHMK1,NOL3,GABPB1,RAB35,PCGF6,RANBP1,DDX39A,SKIV2L,MINK1,RHOF,SUGP1,EEF1A1,ACTR3,LHX4,CSNK2A1,UPF3A,NOD1,PRKACA,STAT2,RPP14,DHX9,PLK1,ZNF446,PNPO,ASNS,DNM1L,PTGES2,TNRC18,UPF1,ZNF621,HDGF,FDXR,RC3H1,PDXK,RHOBTB1,HERC2,CHD6,SEPT4,POLM,EFTUD2,RAB24,CNP,TBX18,GCDH,LBX2,DR1,BCLAF1,CAMK2D,FYTTD1,ZNF721,ZNF397,ZNF710,DHRSX,GALK2,PRPF3,TNK2,STK4,ZNF142,FUBP3,MTG1,RARS,ZNF540,ALDH18A1,FGFR1,RAB18,HSF4,PAIP1,CAPRIN1,GTF3C1,NADSYN1,PMS1,ADCY4,CELF1,PDE4D,RNASET2,SF3A2,SGK1,PLEKHG4,CHKB,NADK,CYP2R1,FKBP1A,ZCCHC14,PRKCH,DAZAP1,ZNF595,TBP,DIS3L,IDH3G,YY1,INO80,GMEB2,SSH2,CREB1,SRP9,RALGPS2,NAGK,PLEKHG5,DDX58,ZCCHC9,FAM114A2,MAGI1,ZEB1,NEK3,EIF4B,CRIP1,SERBP1,SETBP1,RTKN,EBF1,RPL9,FKBP10,UNKL,NPR1,ZNF3,RPS6KA5,G3BP1,RAB31,BRD9,NTPCR,ZNF837,HNRNPA3,RXRB,UBE2Q1,RSL1D1,MITF,NOL8,RB1,HMGXB3,GNAI1,DHRS1,MZF1,ZFPM2,TP53BP1,MARK3,ZNF865,ISYNA1,PUM2,SLFN11,SUB1,FAM200B,AACS,STK38L,DDX6,ZNF558,ZNF263,ZNF180,BICD1,ZNF276,NR1H3,GARS,CYTH2,MRPS7,PLK2,PAN2,ZNF605,CHFR,ZNF410,PTGR2,FMO2,GMDS,RPL24,MAST2,VPS72,FYN,ALDH1A3,IDH1,SRPK1,RUNX2,CSTF1,IKBKB,RFX7,NCOR1,ATP11B,PPP1R10,MEF2A,PARN,FECH,ERAL1,PRKRIP1,STK19,PIAS2,SSBP1,MAPK8,MYLK,DDX41,SRRM2,PBX3,RNF213,N6AMT1,ZNF565,ABCA2,RAB8A,TRIM28,DENND4C,DMTF1,MAP4K4,CSK,CDK5RAP2,ITPA,PSMC6,SWAP70,IMPDH1,UBP1,SKIV2L2,CDK6,EBF4,PRPF8,FARSA,ZNF148,ZNF76,PSMC4,HNRNPL,KIFC2,UBA2,AAK1,SP110,PHKG2,PAK1,RAB10,RHEB,HNRNPH3,TCF4,ACD,TRPM7,IKZF5,HMGN2,SSBP2,CSF1R,TIMM50,DGKZ,ACTR2,NFYC,HSD17B4,PIWIL4,RPUSD4,SRSF10,RCOR3,SMAD4,GRPEL2,ZNF114,MIER2,NAV1,DTYMK,RPL4,MTRR,CENPT,ZNF44,CREBZF,RBMS1,EIF3M,ZNF687,CLK3,NR2C2,FIP1L1,RAB5A,IRF9,BCS1L,ATP5A1,GLI3,NDUFV1,MAPK12,NDUFS2,RASGRF2,AK5,THOC2,SIRT7,ZSCAN5A,TCF12,ARNT,NOX4,ZNF692,ETFA,GAPDH,ERCC1,MTRF1L,BICC1,NRBP2,STK36,SDHA,ATP8B2,ARHGEF7,REXO2,MED6,MDFI,CIRBP,UBA6,ZNF554,IDH3B,PTGR1,NUBP1,CIZ1,HINFP,NCBP2,MLX,PDGFRB,RAD51B,CDK11A,GLIS3,BDP1,MYO7B,FARP1,DBF4,RAP1B,RUNX1,MKNK2,SMARCA4,LRPPRC,RPLP0,DHX40,RAD54L2,ZNF518B,KIF13B,CRCP,CLK4,ZNF90,ZNF638,DOCK8,ADRBK2,CHTF8,PHC3,DNAJC21,GSK3A,SIK3,SNRPE,THUMPD2,POLG,ZNF383,MRPL3,POLR2J3,NCOR2,FPGS,SETD2,TWF1,PRPF4B,PTGIS,TROVE2,MYO1E,D2HGDH,ATXN3,NUCB1,PSTK,PHF21A,GPHN,PDCD4,ARL15,SOX13,ERI3,RGL2,CHD2,RABL3,LONP2,ZBED5,PSMA1,STAT6,CARS2,ACIN1,PSD3,CSNK1E,SON,ZNF138,ZNF705A,NTRK1,TFAM,SHPRH,PHKG1,SMAD9,HBB,ZBTB16,BAZ2A,SIRT3,UCK1,EIF3I,VARS,LARS,DHX37,SEPT2,LUC7L3,PDPK1,TSG101,THAP6,USF1,FOXC1,ZC3H14,STK24,HEMK1,SSH1,RAPGEF6,GAK,MTO1,PABPC1,RBKS,PANK3,UBR5,FASTK,PHC2,SMARCAD1,WNK1,CC2D1A,ZC3H15,DENND6B,PGRMC2,GATA2,PABPN1 | 1.151626701 | 3.52E-05 |
| GO:0032550 | purine ribonucleoside binding | molecular_function | CDK14,DHX34,EIF2B4,CKB,IGF1R,GK5,MYO1D,TARS,RAF1,NLRP1,SEPT5,CDK13,ATP2B1,RAB34,ERCC6L2,CMPK2,GBP3,EEF2K,PGS1,MCF2L,ARHGEF12,VRK2,NARS,LANCL2,DGKA,PNKP,ARHGEF25,RGL4,STARD9,ABCC1,DDX23,MARK4,UHMK1,RAB35,RANBP1,DDX39A,SKIV2L,MINK1,RHOF,EEF1A1,ACTR3,CSNK2A1,NOD1,PRKACA,DHX9,PLK1,ASNS,DNM1L,UPF1,PDXK,RHOBTB1,HERC2,CHD6,SEPT4,EFTUD2,RAB24,CAMK2D,GALK2,TNK2,STK4,MTG1,RARS,ALDH18A1,FGFR1,RAB18,NADSYN1,PMS1,ADCY4,SGK1,PLEKHG4,CHKB,NADK,PRKCH,IDH3G,INO80,RALGPS2,NAGK,PLEKHG5,DDX58,MAGI1,NEK3,RTKN,NPR1,RPS6KA5,G3BP1,RAB31,NTPCR,UBE2Q1,GNAI1,MARK3,SLFN11,AACS,STK38L,DDX6,GARS,CYTH2,PLK2,MAST2,FYN,SRPK1,RUNX2,IKBKB,ATP11B,ERAL1,STK19,MAPK8,MYLK,DDX41,RNF213,ABCA2,RAB8A,DENND4C,MAP4K4,CSK,PSMC6,SWAP70,SKIV2L2,CDK6,FARSA,PSMC4,KIFC2,UBA2,AAK1,PHKG2,PAK1,RAB10,RHEB,TRPM7,CSF1R,DGKZ,ACTR2,DTYMK,CLK3,RAB5A,BCS1L,ATP5A1,MAPK12,RASGRF2,AK5,NRBP2,STK36,ATP8B2,ARHGEF7,UBA6,NUBP1,PDGFRB,RAD51B,CDK11A,MYO7B,FARP1,RAP1B,RUNX1,MKNK2,SMARCA4,DHX40,RAD54L2,KIF13B,CLK4,DOCK8,ADRBK2,GSK3A,SIK3,FPGS,TWF1,PRPF4B,MYO1E,PSTK,GPHN,ARL15,RGL2,CHD2,RABL3,LONP2,CARS2,PSD3,CSNK1E,NTRK1,SHPRH,PHKG1,UCK1,VARS,LARS,DHX37,SEPT2,PDPK1,STK24,RAPGEF6,GAK,RBKS,PANK3,FASTK,SMARCAD1,WNK1,DENND6B | 1.304286706 | 3.65E-05 |
| GO:0008104 | protein localization | biological_process | RAB3GAP2,CADM1,RALGAPA2,BTN3A1,NLRP1,GAS8,CPE,CCDC91,RAB34,MARCH5,BCL6,GPAA1,NUP98,SMAD7,USP4,HDAC6,ATP6V1D,HGS,DERL2,SYTL4,RBPMS,COG4,PAM,AP3S2,UHMK1,ADAM8,RAB35,KPNA6,PRKACA,PLK1,VPS52,LMAN2,NUTF2,DNM1L,HERC2,NUP210,RAB24,ATG4B,VAMP7,BBS1,STK11IP,VTI1A,HPS4,RAB18,DISP1,TIMM23,SEC31A,MDM2,SNAP23,SFT2D2,TLN2,MCFD2,SRP9,DDX58,RPL27,LCP2,PTPRK,SNX13,AP4B1,RHBDF1,SNX21,NF1,RPL9,NIPBL,RAB31,PKD2,LMNA,RSL1D1,RB1,MAPK8IP3,STX16,PAFAH1B1,SENP2,SYTL2,CHMP1A,SYNE1,BICD1,GCC2,NR1H3,FLCN,RPL24,RPL37A,STX2,FBXW7,CEP112,SNX17,KPNB1,PPP1R10,NECAB3,CACNB1,MAPK8,MYCBP2,CLTCL1,RAB8A,DENND4C,CSK,STX18,NUP37,CLTB,FLOT1,AAK1,GOPC,PAK1,LEPROT,RAB10,VPS45,ACD,CSF1R,ATP6V0A1,ERC1,TIMM50,OS9,TMED3,SMAD4,GRPEL2,C1QTNF3,EZR,RPL4,FLNA,RAB5A,SUN2,GLI3,TMED2,MCOLN1,SCFD1,VTI1B,SLC25A6,VAMP4,MDFI,NUP85,HINFP,STAM2,VPS51,CANX,YIF1A,RPLP0,SDAD1,SNX27,KIF13B,RHBDF2,TLN1,NLGN2,TWF1,ATG4A,PDIA3,ATG16L2,SNX14,LONP2,CSNK1E,ATG3,LMF1,SEC31B,SPCS3,SEPT2,PKD1,PDPK1,TSG101,KPNA1,CD63,SCAMP1,UBR5,CLASP1,GORASP1 | 1.343965175 | 3.78E-05 |
| GO:0043167 | ion binding | molecular_function | CDK14,RSPRY1,PLEKHA3,LPP,DHX34,CRIP2,ACADVL,EIF2B4,RAI1,CKB,IGF1R,GK5,PTS,MYO1D,SIRT2,EPHX2,UTRN,MYNN,TARS,RAF1,NLRP1,ZNF131,SEPT5,LEPRE1,COL9A1,CDK13,RBM6,ATP2B1,CPE,PLCD1,COL2A1,RAB34,CALML4,ERCC6L2,MARCH5,BCL6,ZNF783,CMPK2,ENOSF1,GBP3,SHMT2,ZFP91,EEF2K,NLN,PGS1,SMPD4,SMAD7,MCF2L,USP4,HDAC6,ARHGEF12,EHMT1,VRK2,ZNF496,HGS,TYW1B,NARS,LANCL2,SYTL4,DGKA,PNKP,SUPT4H1,ZNF83,ITGA9,ARHGEF25,ADAMTS1,RGL4,ZSCAN31,STARD9,CPM,FDPS,PAM,ABCC1,HSD17B12,DDX23,MARK4,UHMK1,ADAM8,RNF220,RAB35,XAF1,PCGF6,RANBP1,MARCH6,DDX39A,SKIV2L,MINK1,PDLIM5,RNF24,RHOF,EEF1A1,ACTR3,LHX4,CSNK2A1,NOD1,PRKACA,STAT2,DHX9,PLK1,ZNF446,PNPO,LMAN2,PDE7B,ASNS,JAG2,DNM1L,UPF1,ZNF621,HDGF,FDXR,RC3H1,PPP5C,PDXK,RHOBTB1,HERC2,CHD6,ZC3H12A,SEPT4,MIB2,POLM,EFTUD2,AAMP,RAB24,GCDH,PCGF1,CAMK2D,ZNF721,ZNF397,JHDM1D,ZNF710,PLCB4,DNPEP,GALK2,TNK2,USP20,GIT2,FLG,STK4,ZNF142,MTG1,RARS,ZNF540,ALDH18A1,MAN2C1,FGFR1,RAB18,MMP16,NADSYN1,PMS1,ADCY4,PDE4D,SF3A2,TAB2,SGK1,PLEKHG4,SHARPIN,DPF2,CHKB,NADK,IDI1,RNF8,CYP2R1,MDM2,KCMF1,ZCCHC14,ZFYVE26,PRKCH,PPM1F,ZNF595,IDH3G,YY1,INO80,GMEB2,THBS3,MCFD2,RALGPS2,NAGK,PLEKHG5,DDX58,ALDH6A1,ZCCHC9,LIMCH1,MAGI1,ZEB1,NEK3,CRIP1,REPS1,TPM4,COL18A1,RTKN,EBF1,PHF15,FKBP10,UNKL,NPR1,ZNF3,RPS6KA5,G3BP1,RAB31,ALKBH3,NTPCR,ZNF837,PKD2,RXRB,GALT,UBE2Q1,MDP1,PPP2R3C,ITGA3,ZZEF1,LTBP4,RABGGTA,GNAI1,USP3,PLEKHA2,MZF1,ZFPM2,CPPED1,RNF168,MARK3,PAFAH1B1,ZNF865,EDEM2,RNF217,SLFN11,TPP1,ACBD4,SYTL2,CHMP1A,PDE8A,AACS,STK38L,DDX6,ACAP2,ZNF558,ANXA5,GALNT2,ADAM15,USP33,ZNF263,ZNF180,ZNF276,NR1H3,GARS,CYTH2,PLK2,NRP1,ZNF605,CHFR,ZNF410,PTGR2,TENC1,FMO2,GMDS,RPL37A,MAST2,PTEN,FYN,ALDH1A3,IDH1,SRPK1,RUNX2,IQGAP1,C1R,IKBKB,PXN,ADAMTS18,KPNB1,PTPRF,ATP11B,PPP1R10,PARN,ZMYM5,TNS1,FECH,ERAL1,STK19,NECAB3,PIAS2,CLSTN2,MAPK8,MYCBP2,MYLK,DDX41,MAN1A2,RNF213,ZNF565,ABCA2,RAB8A,ZFAND2B,TRIM28,DENND4C,MAP4K4,CSK,CP,ITPA,PTPRC,PSMC6,SWAP70,IMPDH1,RNF146,SKIV2L2,CDK6,ABI3BP,AGBL5,EBF4,DDHD2,FARSA,ZNF148,ZNF76,PSMC4,KIFC2,ARHGAP29,OGFOD3,UBA2,AAK1,SP110,PPA2,PHKG2,PAK1,PCDH7,RAB10,RHEB,ZSWIM7,TRPM7,IKZF5,CSF1R,DGKZ,ACTR2,ZNF609,SMAD4,FNTB,CHURC1,CHURC1-FNTB,ZNF114,TGFB1I1,DDAH1,LIMD2,DTYMK,MTRR,ZNF44,TANK,ING4,ZNF687,CLK3,NR2C2,LRPAP1,RAB5A,CA5B,BCS1L,C1S,ATP5A1,GLI3,THNSL2,ADD3,NDUFV1,MAPK12,NDUFS2,RASGRF2,EPS15L1,AK5,B4GALT4,SIRT7,ZSCAN5A,NOX4,ZNF692,ETFA,PHF1,NRBP2,B3GAT3,STK36,SDHA,ATP8B2,ARHGEF7,DEF8,PHF12,ASAP1,CAPS2,UBA6,RABGGTB,ZNF554,IDH3B,PTGR1,NUBP1,CIZ1,ITGA5,HINFP,MAN2A2,LPCAT1,PDGFRB,DZIP1,RAD51B,CDK11A,MAN1B1,GLIS3,NOB1,ENO4,MYO7B,FARP1,DBF4,RAP1B,CANX,RUNX1,MKNK2,TRIM41,SMARCA4,MFI2,DHX40,SUMF2,RAD54L2,ZNF518B,KIF13B,CLK4,ZNF90,ZNF638,ZC4H2,FGF14,DOCK8,ADRBK2,PHC3,DNAJC21,LONRF3,GSK3A,SIK3,ITGA11,ZNF383,EFCAB2,FPGS,SETD2,TWF1,PRPF4B,COL13A1,PTGIS,WDFY3,MYO1E,D2HGDH,AMFR,NUCB1,MOB1A,PSTK,PHF21A,GPHN,ARL15,PGM2,ERI3,RGL2,CHD2,RABL3,LONP2,ZBED5,STAT6,CARS2,PSD3,CSNK1E,SLC25A24,ZNF138,ZNF705A,CDK5RAP1,BNIP2,NTRK1,SHPRH,PHKG1,CACNA2D1,SMAD9,HBB,TGFBR3,ZFC3H1,CACNA2D4,LIMS2,ZBTB16,STAMBPL1,ZDHHC8,BAZ2A,SIRT3,PLOD2,UCK1,EGFL8,VARS,LARS,PHF19,LMCD1,LETM1,DHX37,SEPT2,PDPK1,THAP6,ZC3H14,DDAH2,ACAN,STK24,RAPGEF6,GAK,MTO1,MMP25,RBKS,PANK3,UBR5,FASTK,EYA2,PHC2,SMARCAD1 | 1.142340519 | 3.82E-05 |
| GO:0001883 | purine nucleoside binding | molecular_function | CDK14,DHX34,EIF2B4,CKB,IGF1R,GK5,MYO1D,TARS,RAF1,NLRP1,SEPT5,CDK13,ATP2B1,RAB34,ERCC6L2,CMPK2,GBP3,EEF2K,PGS1,MCF2L,ARHGEF12,VRK2,NARS,LANCL2,DGKA,PNKP,ARHGEF25,RGL4,STARD9,ABCC1,DDX23,MARK4,UHMK1,RAB35,RANBP1,DDX39A,SKIV2L,MINK1,RHOF,EEF1A1,ACTR3,CSNK2A1,NOD1,PRKACA,DHX9,PLK1,ASNS,DNM1L,UPF1,PDXK,RHOBTB1,HERC2,CHD6,SEPT4,EFTUD2,RAB24,CAMK2D,GALK2,TNK2,STK4,MTG1,RARS,ALDH18A1,FGFR1,RAB18,NADSYN1,PMS1,ADCY4,SGK1,PLEKHG4,CHKB,NADK,PRKCH,IDH3G,INO80,RALGPS2,NAGK,PLEKHG5,DDX58,MAGI1,NEK3,RTKN,NPR1,RPS6KA5,G3BP1,RAB31,NTPCR,UBE2Q1,GNAI1,MARK3,SLFN11,AACS,STK38L,DDX6,GARS,CYTH2,PLK2,MAST2,FYN,SRPK1,RUNX2,IKBKB,ATP11B,ERAL1,STK19,MAPK8,MYLK,DDX41,RNF213,ABCA2,RAB8A,DENND4C,MAP4K4,CSK,PSMC6,SWAP70,SKIV2L2,CDK6,FARSA,PSMC4,KIFC2,UBA2,AAK1,PHKG2,PAK1,RAB10,RHEB,TRPM7,CSF1R,DGKZ,ACTR2,DTYMK,CLK3,RAB5A,BCS1L,ATP5A1,MAPK12,RASGRF2,AK5,NRBP2,STK36,ATP8B2,ARHGEF7,UBA6,NUBP1,PDGFRB,RAD51B,CDK11A,MYO7B,FARP1,RAP1B,RUNX1,MKNK2,SMARCA4,DHX40,RAD54L2,KIF13B,CLK4,DOCK8,ADRBK2,GSK3A,SIK3,FPGS,TWF1,PRPF4B,MYO1E,PSTK,GPHN,ARL15,RGL2,CHD2,RABL3,LONP2,CARS2,PSD3,CSNK1E,NTRK1,SHPRH,PHKG1,UCK1,VARS,LARS,DHX37,SEPT2,PDPK1,STK24,RAPGEF6,GAK,RBKS,PANK3,FASTK,SMARCAD1,WNK1,DENND6B | 1.302341945 | 3.99E-05 |
| GO:0032549 | ribonucleoside binding | molecular_function | CDK14,DHX34,EIF2B4,CKB,IGF1R,GK5,MYO1D,TARS,RAF1,NLRP1,SEPT5,CDK13,ATP2B1,RAB34,ERCC6L2,CMPK2,GBP3,EEF2K,PGS1,MCF2L,ARHGEF12,VRK2,NARS,LANCL2,DGKA,PNKP,ARHGEF25,RGL4,STARD9,ABCC1,DDX23,MARK4,UHMK1,RAB35,RANBP1,DDX39A,SKIV2L,MINK1,RHOF,EEF1A1,ACTR3,CSNK2A1,NOD1,PRKACA,DHX9,PLK1,ASNS,DNM1L,UPF1,PDXK,RHOBTB1,HERC2,CHD6,SEPT4,EFTUD2,RAB24,CAMK2D,GALK2,TNK2,STK4,MTG1,RARS,ALDH18A1,FGFR1,RAB18,NADSYN1,PMS1,ADCY4,SGK1,PLEKHG4,CHKB,NADK,PRKCH,IDH3G,INO80,RALGPS2,NAGK,PLEKHG5,DDX58,MAGI1,NEK3,RTKN,NPR1,RPS6KA5,G3BP1,RAB31,NTPCR,UBE2Q1,GNAI1,MARK3,SLFN11,AACS,STK38L,DDX6,GARS,CYTH2,PLK2,MAST2,FYN,SRPK1,RUNX2,IKBKB,ATP11B,ERAL1,STK19,MAPK8,MYLK,DDX41,RNF213,ABCA2,RAB8A,DENND4C,MAP4K4,CSK,PSMC6,SWAP70,SKIV2L2,CDK6,FARSA,PSMC4,KIFC2,UBA2,AAK1,PHKG2,PAK1,RAB10,RHEB,TRPM7,CSF1R,DGKZ,ACTR2,DTYMK,CLK3,RAB5A,BCS1L,ATP5A1,MAPK12,RASGRF2,AK5,NRBP2,STK36,ATP8B2,ARHGEF7,UBA6,NUBP1,PDGFRB,RAD51B,CDK11A,MYO7B,FARP1,RAP1B,RUNX1,MKNK2,SMARCA4,DHX40,RAD54L2,KIF13B,CLK4,DOCK8,ADRBK2,GSK3A,SIK3,FPGS,TWF1,PRPF4B,MYO1E,PSTK,GPHN,ARL15,RGL2,CHD2,RABL3,LONP2,CARS2,PSD3,CSNK1E,NTRK1,SHPRH,PHKG1,UCK1,VARS,LARS,DHX37,SEPT2,PDPK1,STK24,RAPGEF6,GAK,RBKS,PANK3,FASTK,SMARCAD1,WNK1,DENND6B | 1.301694979 | 4.11E-05 |
| GO:0031252 | cell leading edge | cellular_component | FZD6,MYO1D,RAB34,DPP4,MCF2L,HDAC6,CAPZB,ACTR3,VASP,TLN2,DDX58,PTPRK,PKD2,MAPK8IP3,PAFAH1B1,ARPC2,MTMR14,FAP,IQGAP1,PXN,SRGAP2,ITGB5,MYLK,SWAP70,CDK6,AAK1,PAK1,TRPM7,DGKZ,EZR,RAB5A,ARHGEF7,CTTN,ITGA5,TLN1,TWF1,ROBO2,SSH1 | 1.976752622 | 4.21E-05 |
| GO:0005524 | ATP binding | molecular_function | CDK14,DHX34,CKB,IGF1R,GK5,MYO1D,TARS,RAF1,NLRP1,CDK13,ATP2B1,ERCC6L2,CMPK2,EEF2K,PGS1,VRK2,NARS,LANCL2,DGKA,PNKP,STARD9,ABCC1,DDX23,MARK4,UHMK1,DDX39A,SKIV2L,MINK1,ACTR3,CSNK2A1,NOD1,PRKACA,DHX9,PLK1,ASNS,UPF1,PDXK,CHD6,CAMK2D,GALK2,TNK2,STK4,RARS,ALDH18A1,FGFR1,NADSYN1,PMS1,ADCY4,SGK1,CHKB,NADK,PRKCH,IDH3G,INO80,NAGK,DDX58,MAGI1,NEK3,NPR1,RPS6KA5,G3BP1,NTPCR,UBE2Q1,MARK3,SLFN11,AACS,STK38L,DDX6,GARS,PLK2,MAST2,FYN,SRPK1,RUNX2,IKBKB,ATP11B,STK19,MAPK8,MYLK,DDX41,RNF213,ABCA2,MAP4K4,CSK,PSMC6,SWAP70,SKIV2L2,CDK6,FARSA,PSMC4,KIFC2,UBA2,AAK1,PHKG2,PAK1,TRPM7,CSF1R,DGKZ,ACTR2,DTYMK,CLK3,BCS1L,ATP5A1,MAPK12,AK5,NRBP2,STK36,ATP8B2,UBA6,NUBP1,PDGFRB,RAD51B,CDK11A,MYO7B,RUNX1,MKNK2,SMARCA4,DHX40,RAD54L2,KIF13B,CLK4,ADRBK2,GSK3A,SIK3,FPGS,TWF1,PRPF4B,MYO1E,PSTK,GPHN,CHD2,LONP2,CARS2,CSNK1E,NTRK1,SHPRH,PHKG1,UCK1,VARS,LARS,DHX37,PDPK1,STK24,GAK,RBKS,PANK3,FASTK,SMARCAD1,WNK1 | 1.360721883 | 4.45E-05 |
| GO:0000902 | cell morphogenesis | biological_process | FZD6,CADM1,PSMB10,IGF1R,LAMB1,NPHP3,RAF1,COL9A1,BDNF,COL2A1,BCL6,SMAD7,ARHGEF12,CD72,TTLL3,LEF1,PAX8,ITGA9,ADAM8,CAPZB,PRPF40A,SIPA1L1,MINK1,PDLIM5,ACTR3,LHX4,VASP,CSNK2A1,SLC11A2,CNP,BBS1,STK4,FGFR1,CAPRIN1,KIAA0586,SSH2,CREB1,RGMB,COL18A1,RPS6KA5,RB1,MAPK8IP3,PAFAH1B1,ARPC2,ADAM15,USP33,HEXA,NRP1,PTEN,FYN,IFT172,SRGAP2,MEF2A,TCTN1,CACNB1,MYCBP2,RAB8A,TRIM28,COL9A3,PTPRC,FLOT1,RANBP9,WDR35,PAK1,NCK2,RAB10,SEMA6A,SEMA4D,CSF1R,ROBO3,SS18,SMAD4,TGFB1I1,EZR,FLNA,GLI3,NOX4,EXT1,STK36,TBCE,ASAP1,UNC5B,PTPRD,ITGA5,DZIP1,CC2D2A,FARP1,SMARCA4,KIF13B,PTPN23,TLN1,TROVE2,ROBO2,CACNB3,CLIC4,NTRK1,BRWD1,TGFBR3,TMEM237,SEPT2,FOXC1,STK24,SSH1,C2CD3,CLASP1 | 1.459882778 | 4.57E-05 |
| GO:0010467 | gene expression | biological_process | FZD6,PBX2,KANK2,EIF2B4,GTF3C2,RAI1,PSMB10,XRN1,TNRC6A,SIRT2,EPHX2,MYNN,TRNAU1AP,NOC2L,TARS,ZNF131,RSC1A1,SFSWAP,CDK13,RBM6,SIN3B,CPE,CBX5,SART1,COL2A1,SUPT5H,PWP1,BCL6,FUBP1,ZNF783,TBX2,MMS19,EEF2K,CUX1,RBM17,CLNS1A,EED,FMR1,SMAD7,MCF2L,USP4,HDAC6,GLG1,EHMT1,ZNF496,TYW1B,NARS,LANCL2,LEF1,PAX8,SUPT4H1,ZNF83,PSMB9,EMX2,RBPMS,ZSCAN31,XBP1,PAM,SNRNP70,DDX23,METTL3,APITD1,UHMK1,USP47,ADAM8,NOL3,POLR3E,GABPB1,PRPF40A,PCGF6,DDX39A,SUGP1,EEF1A1,LHX4,CSNK2A1,IGBP1,UPF3A,NOD1,STAT2,RPP14,DHX9,PLK1,ZNF446,PTGES2,UPF1,ZNF621,HDGF,RC3H1,PPP5C,CCNL1,CHD6,ZC3H12A,SYMPK,EFTUD2,FAM58A,TBX18,LBX2,PCGF1,DR1,BCLAF1,ZNF721,ZNF397,JHDM1D,ZNF710,GIGYF2,PRPF3,WAC,ZNF142,FUBP3,RARS,ZNF540,FGFR1,HPS4,HSF4,C2,CFB,DISP1,PAIP1,CAPRIN1,GTF3C1,CELF1,SF3A2,PAF1,TAB2,SGK1,DPF2,RNF8,MDM2,RHBDD1,FKBP1A,PRKCH,PPM1F,ZNF595,TBP,YY1,INO80,GMEB2,PFDN5,CREB1,SRP9,FLII,RPRD1A,DDX58,RPL27,CCNL2,PTPRK,SERPINH1,ZEB1,EIF4B,CRIP1,SERBP1,ASCC2,RGMB,EBF1,RPL9,MED28,ZNF3,RPS6KA5,NIPBL,ALKBH3,BRD9,ZNF837,PKD2,CASP2,HNRNPA3,RXRB,LMNA,RSL1D1,MITF,NOL8,RB1,PRMT5,MAPK8IP3,USP3,MZF1,ZFPM2,TP53BP1,RNF168,ZNF865,SENP2,IL18,PUM2,SUB1,CHMP1A,PDE8A,NSA2,DDX6,ZNF558,ZNF263,ZNF180,BICD1,ZNF276,NR1H3,GARS,MRPS7,PAN2,USP7,PLD6,FLCN,ZNF605,ZNF410,RPL24,RPL37A,SAP30BP,VPS72,PTEN,FYN,SRPK1,RNASEK,RUNX2,CSTF1,FBXW7,INTS4,SMARCD3,IFT172,IKBKB,RQCD1,RFX7,NCOR1,PPP1R10,MEF2A,PARN,FECH,SETD8,PIAS2,MAPK8,MYCBP2,UPK3B,USP15,DDX41,SRRM2,PBX3,ZNF565,ABCA2,AFF4,TRIM28,DMTF1,CDK5RAP2,PSMC6,UBP1,SKIV2L2,CDK6,WDR61,EBF4,PRPF8,FARSA,ZNF148,ZNF76,PSMC4,HNRNPL,AAK1,SP110,PPA2,NCK2,HNRNPH3,CTSH,ZSWIM7,TCF4,IKZF5,HMGN2,WDR4,SEMA4D,SSBP2,ERC1,C3,NFYC,PIWIL4,SRSF10,SS18,RCOR3,SMAD4,CHURC1,CHURC1-FNTB,ZNF114,MIER2,C1QTNF3,TGFB1I1,INO80E,RPL4,ZNF44,CREBZF,ING4,RBMS1,EIF3M,ZNF687,CLK3,NR2C2,FHOD1,FIP1L1,DNTTIP2,MRPL49,FLNA,IRF9,GLI3,TMED2,MAPK12,CCDC59,DCAF6,THOC2,ENG,SIRT7,ZSCAN5A,TCF12,PCSK7,ARNT,ZNF692,GAPDH,PHF1,MTRF1L,STK36,WWP1,PHF12,TBCE,MED6,MDFI,CIRBP,ZNF554,RGS2,HINFP,NCBP2,MLX,TGS1,CDK11A,GLIS3,ELP6,BDP1,RUNX1,MKNK2,SMARCA4,NAA16,LRPPRC,RPLP0,CLASRP,ZNF518B,CRCP,CLK4,ZNF90,ZNF638,PER3,SNRPE,ZNF383,MRPL3,POLR2J3,NCOR2,SETD2,PRPF4B,IGF2,PTGIS,FTSJ3,TROVE2,ATXN3,PSTK,PHF21A,PDCD4,SOX13,CHD2,LONP2,PSMA1,STAT6,CARS2,SON,ZNF138,ZNF705A,CDK5RAP1,NTRK1,TFAM,BRWD1,SMAD9,LMF1,TGFBR3,ZFC3H1,ZBTB16,BAZ2A,SPCS3,EIF3I,RRP8,VARS,LARS,PHF19,LMCD1,LUC7L3,PKD1,PDPK1,TSG101,USF1,FOXC1,ARL6IP4,HEMK1,CDK5RAP3,C2CD3,MTO1,PABPC1,FASTK,EYA2,SMARCAD1,CC2D1A,GATA2,PABPN1 | 1.175643002 | 4.58E-05 |
| GO:0006662 | glycerol ether metabolic process | biological_process | DNAJC10,TXNL1,QSOX1,TXNDC5,P4HB,PDIA5,PDIA3 | 6.287228497 | 4.61E-05 |
| GO:0006725 | cellular aromatic compound metabolic process | biological_process | FZD6,USP10,RNASEH2B,CRBN,OBFC1,RAB3GAP2,PBX2,DHX34,KANK2,ACADVL,EIF2B4,GTF3C2,RAI1,PSMB10,XRN1,IGF1R,PTS,MYO1D,SIRT2,EPHX2,RALGAPA2,MYNN,NOC2L,TARS,RAF1,ZNF131,SEPT5,RSC1A1,SFSWAP,CDK13,RBM6,SIN3B,ATP2B1,CBX5,SART1,RAB34,SUPT5H,SUPT20H,PWP1,BCL6,FUBP1,ZNF783,CMPK2,TBX2,MMS19,GBP3,SHMT2,VAPB,CUX1,RBM17,CLNS1A,NUP98,EED,SMAD7,MCF2L,PPFIBP2,HDAC6,ARHGEF12,EHMT1,ATP6V1D,RNH1,ZNF496,TYW1B,NARS,LANCL2,H6PD,PNKP,LEF1,PAX8,SUPT4H1,ZNF83,PSMB9,EMX2,ARHGEF25,RGL4,RBPMS,STARD13,ZSCAN31,XBP1,PAM,ABCC1,NOM1,SNRNP70,DDX23,RAD23A,METTL3,APITD1,USP47,ADAM8,NOL3,POLR3E,GABPB1,PRPF40A,DNAJC10,RAB35,PCGF6,RANBP1,SIPA1L1,DDX39A,KRIT1,SKIV2L,MINK1,RHOF,SUGP1,EEF1A1,LHX4,CSNK2A1,IGBP1,UPF3A,NOD1,STAT2,RPP14,DHX9,PLK1,ZNF446,PDE7B,ASNS,TBC1D2B,DNM1L,PTGES2,UPF1,ZNF621,HDGF,FDXR,RC3H1,PPP5C,CCNL1,HERC2,CHD6,ZC3H12A,TBC1D10B,SEPT4,POLM,SLC11A2,SYMPK,EFTUD2,FAM58A,CNP,TBX18,GCDH,LBX2,PCGF1,DR1,BCLAF1,ZNF721,ZNF397,JHDM1D,ZNF710,TBC1D14,PRPF3,TNK2,GIT2,WAC,ZNF142,FUBP3,MTG1,RARS,ZNF540,FGFR1,RAB18,HSF4,PAIP1,GTF3C1,ERH,NADSYN1,PMS1,ADCY4,CELF1,SNCAIP,PDE4D,RNASET2,SF3A2,PAF1,TAB2,SGK1,PLEKHG4,DPF2,NADK,RNF8,SEC31A,MDM2,ZFYVE26,PRKCH,PPM1F,ZNF595,TBP,DIS3L,YY1,FAM13A,INO80,GMEB2,PFDN5,CREB1,RALGPS2,FLII,PLEKHG5,RPRD1A,DDX58,ALDH6A1,RPL27,CCNL2,PTPRK,SNX13,NF1,ZEB1,EIF4B,IFITM3,ASCC2,RGMB,RTKN,EBF1,RPL9,MED28,NPR1,ZNF3,RPS6KA5,G3BP1,NIPBL,RAB31,ALKBH3,ADSL,BRD9,ZNF837,PKD2,HNRNPA3,RXRB,GALT,LMNA,MITF,NOL8,RB1,PRMT5,GNAI1,USP3,MZF1,ZFPM2,TP53BP1,RNF168,PAFAH1B1,ZNF865,SENP2,TPP1,SUB1,CHMP1A,PDE8A,NSA2,DDX6,ACAP2,ZNF558,MUM1,ZNF263,ZNF180,BICD1,ZNF276,RGS3,NR1H3,GARS,CYTH2,PAN2,USP7,PLD6,FLCN,CUL4A,ZNF605,ZNF410,FMO2,GMDS,RPL24,ARHGAP9,RPL37A,SAP30BP,VPS72,PTEN,IDH1,SRPK1,RNASEK,RUNX2,CSTF1,IQGAP1,FBXW7,INTS4,SMARCD3,HERPUD1,IKBKB,CTNS,RQCD1,KPNB1,SRGAP2,RFX7,NCOR1,ATP11B,PPP1R10,MEF2A,PARN,FECH,SETD8,PIAS2,SSBP1,MAPK8,MYCBP2,USP15,DDX41,SRRM2,PBX3,RNF213,ZNF565,ABCA2,AFF4,TRIM28,DENND4C,DMTF1,MAP4K4,CDK5RAP2,ITPA,PTPRC,PSMC6,SWAP70,TBCD,IMPDH1,UBP1,SKIV2L2,WDR61,EBF4,PRPF8,FARSA,ZNF148,ZNF76,PSMC4,HNRNPL,ARHGAP29,SGSM3,STAG2,SP110,GOPC,PPA2,NCK2,RHEB,HNRNPH3,ZSWIM7,TCF4,ACD,IKZF5,HMGN2,WDR4,SEMA4D,GNB3,SSBP2,ERC1,NFYC,PIWIL4,RPUSD4,SRSF10,SS18,RCOR3,SMAD4,GRPEL2,CHURC1,CHURC1-FNTB,TBC1D22A,ZNF114,MIER2,TGFB1I1,INO80E,DTYMK,RPL4,ZNF44,CREBZF,ING4,RBMS1,ZNF687,CDC14B,CLK3,SLC23A2,NR2C2,FHOD1,FIP1L1,DNTTIP2,FLNA,RAB5A,IRF9,ATP5A1,GLI3,TMED2,MAPK12,CCDC59,DCAF6,RASGRF2,AK5,THOC2,ENG,SIRT7,ZSCAN5A,TCF12,ARNT,NOX4,ZNF692,ERCC1,PHF1,STK36,WWP1,ATP8B2,ARHGEF7,PHF12,PDIA5,ASAP1,REXO2,MED6,MDFI,ZNF554,IDH3B,NAA10,CIZ1,RGS2,HINFP,NCBP2,MLX,PDGFRB,TGS1,NCAPD3,RAD51B,CDK11A,GLIS3,ELP6,BDP1,FARP1,DBF4,RAP1B,RUNX1,SMARCA4,NAA16,LRPPRC,YIF1A,RPLP0,DHX40,RAD54L2,CLASRP,ZNF518B,CRCP,CLK4,ZNF90,ZNF638,PER3,TLN1,DOCK8,CHTF8,LONRF3,GSK3A,SNRPE,POLG,ZNF383,POLR2J3,NCOR2,FPGS,SETD2,PRPF4B,IGF2,PTGIS,FTSJ3,TROVE2,MYO1E,ATXN3,PSTK,PHF21A,PDCD4,SOX13,ERI3,RGL2,CHD2,LONP2,PSMA1,STAT6,CARS2,ACIN1,PSD3,CSNK1E,SON,ZNF138,ZNF705A,CDK5RAP1,NSMCE4A,BNIP2,NTRK1,TFAM,SHPRH,BRWD1,SMAD9,TGFBR3,ZFC3H1,ZBTB16,BAZ2A,UCK1,RRP8,VARS,LARS,PHF19,LMCD1,DHX37,LUC7L3,PKD1,PDPK1,TSG101 | 1.138810466 | 4.64E-05 |
| GO:0032990 | cell part morphogenesis | biological_process | FZD6,IGF1R,LAMB1,NPHP3,RAF1,COL9A1,BDNF,COL2A1,ARHGEF12,CD72,TTLL3,ITGA9,SIPA1L1,MINK1,PDLIM5,ACTR3,LHX4,VASP,CSNK2A1,DNM1L,SLC11A2,CNP,BBS1,FGFR1,CAPRIN1,KIAA0586,SSH2,CREB1,RGMB,RPS6KA5,MAPK8IP3,PAFAH1B1,USP33,NRP1,PTEN,FYN,IFT172,SRGAP2,MEF2A,TCTN1,SSBP1,CACNB1,MYCBP2,RAB8A,COL9A3,PTPRC,FLOT1,RANBP9,WDR35,PAK1,NCK2,RAB10,SEMA6A,SEMA4D,ROBO3,EZR,FLNA,GLI3,EXT1,STK36,TBCE,ASAP1,UNC5B,PTPRD,ITGA5,DZIP1,CC2D2A,FARP1,KIF13B,PTPN23,TLN1,TROVE2,ROBO2,CACNB3,NTRK1,TMEM237,SEPT2,STK24,SSH1,C2CD3,CLASP1 | 1.550118227 | 4.71E-05 |
| GO:0032555 | purine ribonucleotide binding | molecular_function | CDK14,DHX34,EIF2B4,CKB,IGF1R,GK5,MYO1D,TARS,RAF1,NLRP1,SEPT5,CDK13,ATP2B1,RAB34,ERCC6L2,CMPK2,GBP3,EEF2K,PGS1,MCF2L,ARHGEF12,VRK2,NARS,LANCL2,DGKA,PNKP,ARHGEF25,RGL4,STARD9,ABCC1,DDX23,MARK4,UHMK1,RAB35,RANBP1,DDX39A,SKIV2L,MINK1,RHOF,EEF1A1,ACTR3,CSNK2A1,NOD1,PRKACA,DHX9,PLK1,ASNS,DNM1L,UPF1,PDXK,RHOBTB1,HERC2,CHD6,SEPT4,EFTUD2,RAB24,CAMK2D,GALK2,TNK2,STK4,MTG1,RARS,ALDH18A1,FGFR1,RAB18,NADSYN1,PMS1,ADCY4,PDE4D,SGK1,PLEKHG4,CHKB,NADK,PRKCH,IDH3G,INO80,RALGPS2,NAGK,PLEKHG5,DDX58,MAGI1,NEK3,RTKN,NPR1,RPS6KA5,G3BP1,RAB31,NTPCR,UBE2Q1,GNAI1,MARK3,SLFN11,AACS,STK38L,DDX6,GARS,CYTH2,PLK2,MAST2,FYN,SRPK1,RUNX2,IKBKB,ATP11B,ERAL1,STK19,MAPK8,MYLK,DDX41,RNF213,ABCA2,RAB8A,DENND4C,MAP4K4,CSK,PSMC6,SWAP70,SKIV2L2,CDK6,FARSA,PSMC4,KIFC2,UBA2,AAK1,PHKG2,PAK1,RAB10,RHEB,TRPM7,CSF1R,DGKZ,ACTR2,DTYMK,CLK3,RAB5A,BCS1L,ATP5A1,MAPK12,RASGRF2,AK5,NRBP2,STK36,ATP8B2,ARHGEF7,UBA6,NUBP1,PDGFRB,RAD51B,CDK11A,MYO7B,FARP1,RAP1B,RUNX1,MKNK2,SMARCA4,DHX40,RAD54L2,KIF13B,CLK4,DOCK8,ADRBK2,GSK3A,SIK3,FPGS,TWF1,PRPF4B,MYO1E,PSTK,GPHN,ARL15,RGL2,CHD2,RABL3,LONP2,CARS2,PSD3,CSNK1E,NTRK1,SHPRH,PHKG1,UCK1,VARS,LARS,DHX37,SEPT2,PDPK1,STK24,RAPGEF6,GAK,RBKS,PANK3,FASTK,SMARCAD1,WNK1,DENND6B | 1.295533082 | 5.18E-05 |
| GO:0070647 | protein modification by small protein conjugation or removal | biological_process | USP10,CRBN,PSMB10,PPIL2,SPOP,MARCH5,UBXN1,FBXO32,ZFP91,SMAD7,USP4,HDAC6,PSMB9,APITD1,USP47,RNF220,MARCH6,ANAPC4,PLK1,RC3H1,HERC2,SEPT4,MIB2,PCGF1,USP20,DCAF11,WAC,COPS7B,PAF1,SHARPIN,RNF8,MDM2,FKBP1A,ANAPC16,NUB1,SPSB3,UNKL,DCAF8,UBE2Q1,UBAC1,USP3,RNF168,SENP2,RNF217,USP33,USP7,CUL4A,CHFR,PTEN,FBXW7,HERPUD1,PIAS2,MYCBP2,USP15,RNF213,TRIM28,PSMC6,RNF146,PSMC4,UBA2,OS9,ASB8,CDCA3,CDC14B,DCAF6,ARNT,WWP1,UBA6,TRIM41,DCAF17,KLHL7,FBXW2,ATXN3,AMFR,PSMA1,SHPRH,ATG3,ZBTB16,SENP6,UBR5 | 1.548578448 | 5.43E-05 |
| GO:0001882 | nucleoside binding | molecular_function | CDK14,DHX34,EIF2B4,CKB,IGF1R,GK5,MYO1D,TARS,RAF1,NLRP1,SEPT5,CDK13,ATP2B1,RAB34,ERCC6L2,CMPK2,GBP3,EEF2K,PGS1,MCF2L,ARHGEF12,VRK2,NARS,LANCL2,DGKA,PNKP,ARHGEF25,RGL4,STARD9,ABCC1,DDX23,MARK4,UHMK1,RAB35,RANBP1,DDX39A,SKIV2L,MINK1,RHOF,EEF1A1,ACTR3,CSNK2A1,NOD1,PRKACA,DHX9,PLK1,ASNS,DNM1L,UPF1,PDXK,RHOBTB1,HERC2,CHD6,SEPT4,EFTUD2,RAB24,CAMK2D,GALK2,TNK2,STK4,MTG1,RARS,ALDH18A1,FGFR1,RAB18,NADSYN1,PMS1,ADCY4,SGK1,PLEKHG4,CHKB,NADK,PRKCH,IDH3G,INO80,RALGPS2,NAGK,PLEKHG5,DDX58,MAGI1,NEK3,RTKN,NPR1,RPS6KA5,G3BP1,RAB31,NTPCR,UBE2Q1,GNAI1,MARK3,SLFN11,AACS,STK38L,DDX6,GARS,CYTH2,PLK2,MAST2,FYN,SRPK1,RUNX2,IKBKB,ATP11B,ERAL1,STK19,MAPK8,MYLK,DDX41,RNF213,ABCA2,RAB8A,DENND4C,MAP4K4,CSK,PSMC6,SWAP70,SKIV2L2,CDK6,FARSA,PSMC4,KIFC2,UBA2,AAK1,PHKG2,PAK1,RAB10,RHEB,TRPM7,CSF1R,DGKZ,ACTR2,DTYMK,CLK3,RAB5A,BCS1L,ATP5A1,MAPK12,RASGRF2,AK5,NRBP2,STK36,ATP8B2,ARHGEF7,UBA6,NUBP1,PDGFRB,RAD51B,CDK11A,MYO7B,FARP1,RAP1B,RUNX1,MKNK2,SMARCA4,DHX40,RAD54L2,KIF13B,CLK4,DOCK8,ADRBK2,GSK3A,SIK3,FPGS,TWF1,PRPF4B,MYO1E,PSTK,GPHN,ARL15,RGL2,CHD2,RABL3,LONP2,CARS2,PSD3,CSNK1E,NTRK1,SHPRH,PHKG1,UCK1,VARS,LARS,DHX37,SEPT2,PDPK1,STK24,RAPGEF6,GAK,RBKS,PANK3,FASTK,SMARCAD1,WNK1,DENND6B | 1.295260501 | 5.50E-05 |
| GO:0016607 | nuclear speck | cellular_component | CDK13,SNRNP70,METTL3,PRPF40A,CCNL1,EFTUD2,FYTTD1,PRPF3,WAC,CCNL2,PIAS2,SRRM2,PRPF8,ATPAF2,TIMM50,SRSF10,CLK3,FAM76B,ZNF638,ACIN1,SON,PNISR,ZBTB16,LUC7L3,ZC3H14 | 2.332221296 | 5.94E-05 |
| GO:0051603 | proteolysis involved in cellular protein catabolic process | biological_process | USP10,CRBN,PSMB10,SIRT2,SPOP,UBXN1,SMAD7,USP4,HDAC6,DERL2,PSMB9,RAD23A,USP47,DNAJC10,PRKACA,ANAPC4,PLK1,HERC2,USP20,WAC,RNF8,MDM2,RHBDD1,RHBDF1,NUB1,USP24,USP3,RNF168,RNF217,USP33,PAN2,USP7,CUL4A,CHFR,PTEN,FBXW7,HERPUD1,USP15,PSMC6,RNF146,PSMC4,OS9,TGFB1I1,USP54,WWP1,UBA6,MAN1B1,USP40,ATXN3,AMFR,LONP2,PSMA1,CSNK1E,TSG101,UBR5 | 1.711304358 | 6.07E-05 |
| GO:0016773 | phosphotransferase activity, alcohol group as acceptor | molecular_function | CDK14,ACADVL,IGF1R,GK5,RAF1,CDK13,ZFP91,EEF2K,VAPB,VRK2,DGKA,PNKP,XBP1,MARK4,UHMK1,ADAM8,MINK1,PTPN6,CSNK2A1,NOD1,PRKACA,PLK1,ASNS,HDGF,PDXK,CCNL1,FAM58A,CAMK2D,GALK2,TNK2,STK4,FGFR1,ADCY4,TAB2,SGK1,CHKB,NADK,SEC31A,FKBP1A,PRKCH,PPM1F,NAGK,CCNL2,NF1,NEK3,NPR1,RPS6KA5,PKD2,LMNA,RB1,LTBP4,MAPK8IP3,MARK3,TPP1,STK38L,SH3BP5,RGS3,PLK2,NRP1,MAST2,PTEN,FYN,SRPK1,IQGAP1,FBXW7,HERPUD1,IKBKB,PXN,PRKRIP1,STK19,MAPK8,MYLK,TRIM28,MAP4K4,CSK,PTPRC,CDK6,AAK1,PHKG2,PAK1,NCK2,TRPM7,CSF1R,DGKZ,CLK3,MAPK12,AK5,ENG,NOX4,NRBP2,STK36,PDIA5,MDFI,RGS2,PDGFRB,CDK11A,CARD14,MKNK2,YIF1A,CLK4,TLN1,ADRBK2,GSK3A,SIK3,TWF1,PRPF4B,IGF2,PDCD4,CRIPAK,CSNK1E,CDK5RAP1,NTRK1,SPRED1,TNFRSF10B,PHKG1,DUSP6,TGFBR3,UCK1,PKD1,PDPK1,STK24,CDK5RAP3,GAK,RBKS,PANK3,FASTK,WNK1 | 1.393467816 | 6.07E-05 |
| GO:0030554 | adenyl nucleotide binding | molecular_function | CDK14,DHX34,CKB,IGF1R,GK5,MYO1D,TARS,RAF1,NLRP1,CDK13,ATP2B1,ERCC6L2,CMPK2,EEF2K,PGS1,VRK2,NARS,LANCL2,DGKA,PNKP,STARD9,ABCC1,DDX23,MARK4,UHMK1,DDX39A,SKIV2L,MINK1,ACTR3,CSNK2A1,NOD1,PRKACA,DHX9,PLK1,ASNS,UPF1,PDXK,CHD6,CAMK2D,GALK2,TNK2,STK4,RARS,ALDH18A1,FGFR1,NADSYN1,PMS1,ADCY4,PDE4D,SGK1,CHKB,NADK,PRKCH,IDH3G,INO80,NAGK,DDX58,MAGI1,NEK3,NPR1,RPS6KA5,G3BP1,NTPCR,UBE2Q1,MARK3,SLFN11,AACS,STK38L,DDX6,GARS,PLK2,MAST2,FYN,SRPK1,RUNX2,IKBKB,ATP11B,STK19,MAPK8,MYLK,DDX41,RNF213,ABCA2,MAP4K4,CSK,PSMC6,SWAP70,SKIV2L2,CDK6,FARSA,PSMC4,KIFC2,UBA2,AAK1,PHKG2,PAK1,TRPM7,CSF1R,DGKZ,ACTR2,GRPEL2,DTYMK,CLK3,BCS1L,ATP5A1,MAPK12,AK5,NRBP2,STK36,ATP8B2,UBA6,NUBP1,PDGFRB,RAD51B,CDK11A,MYO7B,RUNX1,MKNK2,SMARCA4,DHX40,RAD54L2,KIF13B,CLK4,ADRBK2,GSK3A,SIK3,FPGS,TWF1,PRPF4B,MYO1E,PSTK,GPHN,CHD2,LONP2,CARS2,CSNK1E,NTRK1,SHPRH,PHKG1,UCK1,VARS,LARS,DHX37,PDPK1,STK24,GAK,RBKS,PANK3,FASTK,SMARCAD1,WNK1 | 1.348889676 | 6.11E-05 |
| GO:0004674 | protein serine/threonine kinase activity | molecular_function | CDK14,IGF1R,RAF1,CDK13,ZFP91,EEF2K,VRK2,MARK4,UHMK1,ADAM8,MINK1,PTPN6,CSNK2A1,NOD1,PRKACA,PLK1,CCNL1,FAM58A,CAMK2D,TNK2,STK4,FGFR1,TAB2,SGK1,FKBP1A,PRKCH,CCNL2,NF1,NEK3,RPS6KA5,PKD2,LTBP4,MAPK8IP3,MARK3,STK38L,RGS3,PLK2,MAST2,PTEN,SRPK1,IKBKB,PXN,STK19,MAPK8,MYLK,MAP4K4,CSK,PTPRC,CDK6,AAK1,PHKG2,PAK1,TRPM7,CSF1R,CLK3,MAPK12,AK5,ENG,NOX4,STK36,MDFI,RGS2,PDGFRB,CDK11A,CARD14,MKNK2,CLK4,ADRBK2,GSK3A,SIK3,PRPF4B,IGF2,PDCD4,CSNK1E,CDK5RAP1,NTRK1,SPRED1,TNFRSF10B,PHKG1,DUSP6,TGFBR3,PKD1,PDPK1,STK24,CDK5RAP3,GAK,FASTK,WNK1 | 1.504550798 | 6.54E-05 |
| GO:0044432 | endoplasmic reticulum part | cellular_component | LEPRE1,COL9A1,COL2A1,HLA-DPB1,MARCH5,UBXN1,PLD1,VAPB,GPAA1,SMPD4,VRK2,DERL2,IL15RA,H6PD,HLA-C,XYLT1,HSD17B12,HLA-DQA1,MPDU1,DNAJC10,MARCH6,PIGS,LMAN2,COL16A1,PIGG,SHISA5,NUP210,CLN8,PIGN,VAMP7,CAMK2D,COL14A1,RNASET2,SGK1,CYP2R1,SEC31A,RHBDD1,COL12A1,FKBP1A,SRP9,RHBDF1,SERPINH1,EMC3,COL18A1,FKBP10,ALG6,PKD2,TXNDC5,EDEM2,FMO2,HERPUD1,TMEM189,NECAB3,CLSTN2,OSBPL3,HLA-F,COL9A3,TMEM66,STX18,EMC4,RAB10,OS9,P4HB,ELOVL1,TMED3,SLC39A7,MBOAT2,AUP1,LRPAP1,TMED2,RASGRF2,SCFD1,NOX4,EXT1,PDIA5,LPCAT1,COL8A1,EBPL,MAN1B1,CANX,YIF1A,SUMF2,RHBDF2,PAPPA-AS1,PCYT1A,PIGO,PDIA3,COL13A1,PTGIS,AMFR,LMF1,SEC31B,PLOD2,KDELC2,SPCS3,CES2,ALG9 | 1.473781535 | 6.57E-05 |
| GO:0097159 | organic cyclic compound binding | molecular_function | CDK14,OBFC1,PBX2,DHX34,ACADVL,EIF2B4,GTF3C2,XRN1,CKB,IGF1R,GK5,TNRC6A,MYO1D,SIRT2,MYNN,TRNAU1AP,TARS,RAF1,NLRP1,ZNF131,SEPT5,SFSWAP,CDK13,RBM6,ATP2B1,RAB34,ERCC6L2,BCL6,FUBP1,ZNF783,CMPK2,TBX2,GBP3,ZFP91,EEF2K,CUX1,PGS1,RBM17,SLC9B2,FMR1,SMAD7,MCF2L,PPFIBP2,ARHGEF12,VRK2,ZNF496,TYW1B,NARS,LANCL2,H6PD,DGKA,PNKP,LEF1,PAX8,ZNF83,EMX2,ARHGEF25,RGL4,RBPMS,ZSCAN31,STARD9,XBP1,ABCC1,NOM1,SNRNP70,HSD17B12,DDX23,RAD23A,METTL3,APITD1,MARK4,UHMK1,NOL3,GABPB1,RAB35,PCGF6,RANBP1,DDX39A,SKIV2L,MINK1,RHOF,SUGP1,EEF1A1,ACTR3,LHX4,CSNK2A1,UPF3A,NOD1,PRKACA,STAT2,RPP14,DHX9,PLK1,ZNF446,PNPO,ASNS,DNM1L,PTGES2,TNRC18,UPF1,ZNF621,HDGF,FDXR,RC3H1,PDXK,NPC1,RHOBTB1,HERC2,CHD6,SEPT4,POLM,EFTUD2,RAB24,CNP,TBX18,GCDH,LBX2,DR1,BCLAF1,CAMK2D,FYTTD1,ZNF721,ZNF397,ZNF710,DHRSX,GALK2,PRPF3,TNK2,STK4,ZNF142,FUBP3,MTG1,RARS,ZNF540,ALDH18A1,FGFR1,RAB18,HSF4,PAIP1,CAPRIN1,GTF3C1,NADSYN1,PMS1,ADCY4,CELF1,PDE4D,RNASET2,SF3A2,SGK1,PLEKHG4,CHKB,NADK,CYP2R1,FKBP1A,ZCCHC14,PRKCH,DAZAP1,ZNF595,TBP,DIS3L,IDH3G,YY1,INO80,GMEB2,SSH2,CREB1,SRP9,RALGPS2,NAGK,PLEKHG5,DDX58,ZCCHC9,FAM114A2,MAGI1,ZEB1,NEK3,EIF4B,CRIP1,SERBP1,SETBP1,RTKN,EBF1,RPL9,FKBP10,UNKL,NPR1,ZNF3,RPS6KA5,G3BP1,RAB31,BRD9,NTPCR,ZNF837,HNRNPA3,RXRB,UBE2Q1,RSL1D1,MITF,NOL8,RB1,HMGXB3,GNAI1,DHRS1,MZF1,ZFPM2,TP53BP1,MARK3,ZNF865,ISYNA1,PUM2,SLFN11,STARD3,SUB1,FAM200B,AACS,STK38L,DDX6,ZNF558,ZNF263,ZNF180,BICD1,ZNF276,NR1H3,GARS,CYTH2,MRPS7,PLK2,PAN2,ZNF605,CHFR,ZNF410,PTGR2,FMO2,GMDS,RPL24,MAST2,VPS72,FYN,ALDH1A3,IDH1,SRPK1,RUNX2,CSTF1,IKBKB,RFX7,NCOR1,ATP11B,PPP1R10,MEF2A,PARN,FECH,ERAL1,PRKRIP1,STK19,PIAS2,SSBP1,MAPK8,MYLK,DDX41,SRRM2,OSBPL3,PBX3,RNF213,N6AMT1,ZNF565,ABCA2,RAB8A,TRIM28,DENND4C,DMTF1,MAP4K4,CSK,CDK5RAP2,ITPA,PSMC6,SWAP70,IMPDH1,UBP1,SKIV2L2,CDK6,EBF4,PRPF8,FARSA,ZNF148,ZNF76,PSMC4,HNRNPL,KIFC2,UBA2,AAK1,SP110,PHKG2,PAK1,RAB10,RHEB,HNRNPH3,TCF4,ACD,TRPM7,IKZF5,HMGN2,SSBP2,CSF1R,TIMM50,DGKZ,ACTR2,NFYC,HSD17B4,PIWIL4,RPUSD4,SRSF10,RCOR3,SMAD4,GRPEL2,ZNF114,MIER2,NAV1,DTYMK,RPL4,MTRR,CENPT,ZNF44,CREBZF,RBMS1,EIF3M,ZNF687,CLK3,NR2C2,FIP1L1,RAB5A,IRF9,BCS1L,ATP5A1,GLI3,NDUFV1,MAPK12,NDUFS2,RASGRF2,AK5,THOC2,SIRT7,ZSCAN5A,TCF12,ARNT,NOX4,ZNF692,ETFA,GAPDH,ERCC1,MTRF1L,BICC1,NRBP2,STK36,SDHA,ATP8B2,ARHGEF7,REXO2,MED6,MDFI,CIRBP,UBA6,ZNF554,IDH3B,PTGR1,NUBP1,CIZ1,HINFP,NCBP2,MLX,PDGFRB,RAD51B,CDK11A,GLIS3,BDP1,MYO7B,FARP1,DBF4,RAP1B,RUNX1,MKNK2,SMARCA4,LRPPRC,RPLP0,DHX40,RAD54L2,ZNF518B,KIF13B,CRCP,CLK4,ZNF90,ZNF638,DOCK8,ADRBK2,CHTF8,PHC3,DNAJC21,GSK3A,SIK3,SNRPE,THUMPD2,POLG,ZNF383,MRPL3,POLR2J3,NCOR2,FPGS,SETD2,TWF1,PRPF4B,PTGIS,TROVE2,MYO1E,D2HGDH,ATXN3,NUCB1,PSTK,PHF21A,GPHN,PDCD4,ARL15,SOX13,ERI3,RGL2,CHD2,RABL3,LONP2,ZBED5,PSMA1,STAT6,CARS2,ACIN1,PSD3,CSNK1E,SON,ZNF138,ZNF705A,NTRK1,TFAM,SHPRH,PHKG1,SMAD9,HBB,ZBTB16,BAZ2A,SIRT3,UCK1,EIF3I,VARS,LARS,DHX37,SEPT2,LUC7L3,PDPK1,TSG101,THAP6,USF1,FOXC1,ZC3H14,STK24,HEMK1,SSH1,RAPGEF6,GAK,MTO1,PABPC1,RBKS,PANK3,UBR5,FASTK,PHC2,SMARCAD1,WNK1,CC2D1A,ZC3H15,DENND6B,PGRMC2,GATA2,PABPN1 | 1.144316314 | 6.59E-05 |
| GO:0043234 | protein complex | cellular_component | CDK14,RNASEH2B,CRBN,PBX2,EIF2B4,GTF3C2,PSMB10,LAMB1,MYO1D,SIRT2,UTRN,PPIL2,NLRP1,SEPT5,GAS8,CDK13,SPOP,CBX5,SUPT5H,SUPT20H,HLA-DPB1,UBXN1,TBX2,MMS19,CNTF,GPAA1,NUP98,EED,FMR1,SMAD7,HDAC6,ATP6V1D,DYNC1I1,RNH1,TTLL3,ARPC4-TTLL3,LEF1,HLA-C,SUPT4H1,PSMB9,ITGA9,BCL2L11,STARD9,COG4,HLA-DQA1,RAD23A,AP3S2,APITD1,USP47,ADAM8,MAP7D1,CAPZB,DNAJC10,PCGF6,KRIT1,SKIV2L,PTPN6,EEF1A1,ACTR3,CSNK2A1,UPF3A,PRKACA,ANAPC4,DHX9,PIGS,PLK1,NUTF2,DNM1L,TXNL1,UPF1,HDGF,NUP210,SEPT4,MIB2,SLC11A2,IL13RA1,CNP,PCGF1,VAMP7,DR1,CAMK2D,HLA-DMB,BBS1,TNK2,FLG,DCAF11,RARS,COPS7B,VTI1A,GTF3C1,PMS1,TIMM23,PAF1,SHARPIN,TCHP,RNF8,SEC31A,MDM2,ANAPC16,PPM1F,TBP,DIS3L,YY1,INO80,PFDN5,CREB1,SRP9,RPRD1A,AP4B1,ZEB1,EIF4B,EMC3,ATG12,NUMA1,TPM4,MED28,PHF15,NIPBL,DCAF8,PKD2,STRN4,LMNA,MITF,ITGA3,RB1,PRMT5,GNAI1,PLEKHA2,STX16,TP53BP1,BLOC1S5,RNF168,PAFAH1B1,SENP2,DNALI1,SUB1,ARPC2,SYNE1,EPN2,USP33,BICD1,NRP1,CUL4A,VPS72,RUNX2,IQGAP1,FBXW7,INTS4,SMARCD3,IKBKB,RQCD1,PXN,KPNB1,NCOR1,PPP1R10,SMEK1,WASH4P,ITGB5,TCTN1,CACNB1,CLTCL1,PBX3,HLA-F,N6AMT1,ABCA2,DENND4C,CDK5RAP2,PSMC6,TBCD,EMC4,SKIV2L2,DSN1,CDK6,WDR61,NUP37,APPL2,CLTB,FLOT1,PSMC4,KIFC2,GOPC,RANBP9,WDR35,PHKG2,PARD6G,PAK1,RAB10,ZSWIM7,TCF4,CSF1R,ATP6V0A1,ERC1,TIMM50,OS9,ACTR2,NFYC,TMED3,SS18,SMAD4,FNTB,CHURC1-FNTB,KLC1,NAV1,INO80E,EZR,CENPT,ING4,EIF3M,DNHD1,FIP1L1,DLST,FLNA,SUN2,MSL1,BCS1L,ACTR10,ATP5A1,GLI3,NDUFV1,DCAF6,NDUFS2,THOC2,VEZT,ENG,SCFD1,SIRT7,TCF12,ARNT,NOX4,ERCC1,PHF1,SLC25A6,SDHA,WWP1,ARHGEF7,PHF12,TBCE,NAT9,VAMP4,MED6,NUP85,HAUS5,ITGA5,CLIP2,NCBP2,VPS51,DZIP1,NCAPD3,ELP6,CC2D2A,DIABLO,ENO4,MYO7B,RAP1B,SMARCA4,LMNB1,NAA16,LRPPRC,KIF13B,CRCP,DCAF17,KLHL7,PHC3,GSK3A,ITGA11,POLG,NCOR2,KANSL3,NARF,MYO1E,DYNC1I2,MAU2,PHF21A,PSMA1,CACNB3,CLIC4,NSMCE4A,BNIP2,PHKG1,CACNA2D1,ATG3,SMAD9,HBB,TGFBR3,ZBTB16,BAZ2A,SPCS3,EIF3I,RRP8,PHF19,SEPT2,UQCRH,PKD1,USF1,FOXC1,KPNA1,PHC2,CLASP1,GATA2 | 1.213810561 | 7.51E-05 |
| GO:0048858 | cell projection morphogenesis | biological_process | FZD6,IGF1R,LAMB1,NPHP3,RAF1,COL9A1,BDNF,COL2A1,ARHGEF12,CD72,TTLL3,ITGA9,SIPA1L1,MINK1,PDLIM5,ACTR3,LHX4,VASP,CSNK2A1,SLC11A2,CNP,BBS1,FGFR1,CAPRIN1,KIAA0586,SSH2,CREB1,RGMB,RPS6KA5,MAPK8IP3,PAFAH1B1,USP33,NRP1,PTEN,FYN,IFT172,SRGAP2,MEF2A,TCTN1,CACNB1,MYCBP2,RAB8A,COL9A3,PTPRC,FLOT1,RANBP9,WDR35,PAK1,NCK2,RAB10,SEMA6A,SEMA4D,ROBO3,EZR,FLNA,GLI3,EXT1,STK36,TBCE,ASAP1,UNC5B,PTPRD,ITGA5,DZIP1,CC2D2A,FARP1,KIF13B,PTPN23,TLN1,TROVE2,ROBO2,CACNB3,NTRK1,TMEM237,SEPT2,STK24,SSH1,C2CD3,CLASP1 | 1.538060646 | 7.59E-05 |
| GO:0006511 | ubiquitin-dependent protein catabolic process | biological_process | USP10,CRBN,PSMB10,SIRT2,SPOP,UBXN1,SMAD7,USP4,HDAC6,DERL2,PSMB9,RAD23A,USP47,DNAJC10,ANAPC4,PLK1,HERC2,USP20,WAC,RNF8,MDM2,RHBDD1,NUB1,USP24,USP3,RNF168,RNF217,USP33,PAN2,USP7,CUL4A,CHFR,PTEN,FBXW7,HERPUD1,USP15,PSMC6,RNF146,PSMC4,OS9,TGFB1I1,USP54,WWP1,UBA6,MAN1B1,USP40,ATXN3,AMFR,PSMA1,CSNK1E,TSG101,UBR5 | 1.725558842 | 7.71E-05 |
| GO:0012505 | endomembrane system | cellular_component | SLC16A3,CPE,CBX5,RAB34,HLA-DPB1,ST3GAL1,MARCH5,UBXN1,PLD1,VAPB,GPAA1,CUX1,NUP98,SMPD4,GLG1,VRK2,DERL2,IL15RA,SYTL4,HLA-C,BCL2L11,XYLT1,COG4,PAM,HSD17B12,HLA-DQA1,AP3S2,MPDU1,ADAM8,RAB35,CD9,RANBP1,MARCH6,RNF24,ACTR3,PIGS,LMAN2,NUTF2,DNM1L,PTGES2,PIGG,NPC1,SHISA5,NUP210,SLC11A2,CLN8,PIGN,VAMP7,CAMK2D,TNK2,VTI1A,SGK1,CYP2R1,SEC31A,MDM2,RHBDD1,FKBP1A,MCFD2,SRP9,QSOX1,RHBDF1,SNX21,REPS1,EMC3,RAB31,ALG6,ST3GAL4,GCNT2,PKD2,LMNA,GOLGA8B,GOLGA8A,MAPK8IP3,STX16,PAFAH1B1,SENP2,EDEM2,CHMP1A,SYNE1,EPN2,GALNT2,ADAM15,FMO2,UST,HERPUD1,SNX17,KPNB1,ATP11B,TMEM189,NECAB3,FIBP,CLSTN2,CLTCL1,MAN1A2,OSBPL3,HLA-F,RAB8A,SLC35D2,DENND4C,TMEM66,STX18,EMC4,NUP37,CLTB,AAK1,GOPC,ST6GALNAC5,PAK1,NCK2,LEPROT,RAB10,VPS45,ATP6V0A1,ERC1,OS9,ELOVL1,FUT4,TMED3,SLC35A4,SLC39A7,MBOAT2,AUP1,GOLPH3,CDC14B,SUN2,MGAT5,TMED2,RASGRF2,EPS15L1,EPN1,B4GALT4,SCFD1,PCSK7,NOX4,EXT1,VTI1B,B3GAT3,PDIA5,VAMP4,NUP85,MAN2A2,LPCAT1,EBPL,MAN1B1,CANX,LMNB1,LRPPRC,YIF1A,RHBDF2,PAPPA-AS1,PCYT1A,PIGO,PTGIS,WDFY3,CORO7,AMFR,CLIC4,BNIP2,LMF1,SEC31B,ZDHHC8,PLOD2,SPCS3,LRP3,KPNA1,SLC9A8,CD63,ALG9,GORASP1 | 1.318947236 | 7.87E-05 |
| GO:0032559 | adenyl ribonucleotide binding | molecular_function | CDK14,DHX34,CKB,IGF1R,GK5,MYO1D,TARS,RAF1,NLRP1,CDK13,ATP2B1,ERCC6L2,CMPK2,EEF2K,PGS1,VRK2,NARS,LANCL2,DGKA,PNKP,STARD9,ABCC1,DDX23,MARK4,UHMK1,DDX39A,SKIV2L,MINK1,ACTR3,CSNK2A1,NOD1,PRKACA,DHX9,PLK1,ASNS,UPF1,PDXK,CHD6,CAMK2D,GALK2,TNK2,STK4,RARS,ALDH18A1,FGFR1,NADSYN1,PMS1,ADCY4,PDE4D,SGK1,CHKB,NADK,PRKCH,IDH3G,INO80,NAGK,DDX58,MAGI1,NEK3,NPR1,RPS6KA5,G3BP1,NTPCR,UBE2Q1,MARK3,SLFN11,AACS,STK38L,DDX6,GARS,PLK2,MAST2,FYN,SRPK1,RUNX2,IKBKB,ATP11B,STK19,MAPK8,MYLK,DDX41,RNF213,ABCA2,MAP4K4,CSK,PSMC6,SWAP70,SKIV2L2,CDK6,FARSA,PSMC4,KIFC2,UBA2,AAK1,PHKG2,PAK1,TRPM7,CSF1R,DGKZ,ACTR2,DTYMK,CLK3,BCS1L,ATP5A1,MAPK12,AK5,NRBP2,STK36,ATP8B2,UBA6,NUBP1,PDGFRB,RAD51B,CDK11A,MYO7B,RUNX1,MKNK2,SMARCA4,DHX40,RAD54L2,KIF13B,CLK4,ADRBK2,GSK3A,SIK3,FPGS,TWF1,PRPF4B,MYO1E,PSTK,GPHN,CHD2,LONP2,CARS2,CSNK1E,NTRK1,SHPRH,PHKG1,UCK1,VARS,LARS,DHX37,PDPK1,STK24,GAK,RBKS,PANK3,FASTK,SMARCAD1,WNK1 | 1.343510894 | 7.89E-05 |
| GO:0003723 | RNA binding | molecular_function | DHX34,EIF2B4,XRN1,TNRC6A,TRNAU1AP,SFSWAP,RBM6,FUBP1,EEF2K,RBM17,FMR1,RBPMS,NOM1,SNRNP70,METTL3,UHMK1,NOL3,SKIV2L,SUGP1,EEF1A1,UPF3A,RPP14,DHX9,UPF1,RC3H1,CNP,FYTTD1,FUBP3,RARS,PAIP1,CAPRIN1,CELF1,RNASET2,DAZAP1,DIS3L,YY1,SRP9,DDX58,EIF4B,SERBP1,RPL9,G3BP1,HNRNPA3,RSL1D1,NOL8,PUM2,SLFN11,DDX6,MRPS7,RPL24,CSTF1,PPP1R10,PARN,FECH,ERAL1,PRKRIP1,DDX41,SRRM2,IMPDH1,PRPF8,FARSA,HNRNPL,HNRNPH3,TIMM50,PIWIL4,RPUSD4,SRSF10,RPL4,RBMS1,EIF3M,FIP1L1,THOC2,MTRF1L,BICC1,CIRBP,NCBP2,LRPPRC,RPLP0,ZNF638,SNRPE,THUMPD2,MRPL3,TROVE2,PSTK,PDCD4,PSMA1,SON,BAZ2A,EIF3I,LUC7L3,ZC3H14,PABPC1,UBR5,PABPN1 | 1.472895253 | 8.19E-05 |
| GO:0044265 | cellular macromolecule catabolic process | biological_process | USP10,RNASEH2B,CRBN,PSMB10,XRN1,SIRT2,SPOP,UBXN1,SMAD7,USP4,HDAC6,RNH1,DERL2,PNKP,PSMB9,RAD23A,USP47,DNAJC10,UPF3A,PRKACA,ANAPC4,PLK1,UPF1,RC3H1,HERC2,CLN8,USP20,WAC,PAIP1,RNASET2,RNF8,MDM2,RHBDD1,DIS3L,RPL27,RHBDF1,EIF4B,NUB1,RPL9,USP24,USP3,RNF168,RNF217,DDX6,USP33,PAN2,USP7,CUL4A,CHFR,RPL24,RPL37A,PTEN,FBXW7,HERPUD1,RQCD1,KPNB1,PARN,USP15,PSMC6,RNF146,PSMC4,OS9,TGFB1I1,RPL4,USP54,ERCC1,WWP1,UBA6,NCBP2,MAN1B1,USP40,RPLP0,ATXN3,AMFR,LONP2,PSMA1,CSNK1E,TSG101,KPNA1,PABPC1,UBR5,SMARCAD1 | 1.519609167 | 8.41E-05 |
| GO:0044257 | cellular protein catabolic process | biological_process | USP10,CRBN,PSMB10,SIRT2,SPOP,UBXN1,SMAD7,USP4,HDAC6,DERL2,PSMB9,RAD23A,USP47,DNAJC10,PRKACA,ANAPC4,PLK1,HERC2,CLN8,USP20,WAC,RNF8,MDM2,RHBDD1,RHBDF1,NUB1,USP24,USP3,RNF168,RNF217,USP33,PAN2,USP7,CUL4A,CHFR,PTEN,FBXW7,HERPUD1,USP15,PSMC6,RNF146,PSMC4,OS9,TGFB1I1,USP54,WWP1,UBA6,MAN1B1,USP40,ATXN3,AMFR,LONP2,PSMA1,CSNK1E,TSG101,UBR5 | 1.680328329 | 8.61E-05 |
| GO:0030163 | protein catabolic process | biological_process | USP10,CRBN,PSMB10,SIRT2,SPOP,UBXN1,SMAD7,USP4,HDAC6,HGS,DERL2,PSMB9,RAD23A,USP47,ADAM8,DNAJC10,CSNK2A1,PRKACA,ANAPC4,PLK1,HERC2,CLN8,USP20,WAC,RNF8,MDM2,RHBDD1,RHBDF1,NUB1,USP24,USP3,RNF168,RNF217,TPP1,USP33,PAN2,USP7,CUL4A,CHFR,PTEN,FYN,FBXW7,HERPUD1,USP15,PSMC6,RNF146,PSMC4,SGSM3,OS9,SMAD4,TGFB1I1,USP54,FLNA,WWP1,UBA6,LPCAT1,MAN1B1,USP40,GSK3A,ATXN3,AMFR,LONP2,PSMA1,CSNK1E,TSG101,UBR5 | 1.602150891 | 8.98E-05 |
| GO:0016788 | hydrolase activity, acting on ester bonds | molecular_function | USP10,ACADVL,XRN1,MYO1D,EPHX2,PLCD1,PTPN22,PLD1,VAPB,SMPD4,USP4,RNH1,H6PD,PNKP,XBP1,USP47,PTPN6,CSNK2A1,IGBP1,PRKACA,RPP14,PDE7B,ASNS,HDGF,PPP5C,ZC3H12A,CNP,PIGN,PLCB4,USP20,FGFR1,ADCY4,PDE4D,RNASET2,SEC31A,FKBP1A,MTMR11,PPM1F,DIS3L,SSH2,CREB1,ZCCHC9,PTPRK,G3BP1,NTPCR,NEDD8-MDP1,MDP1,LMNA,USP24,USP3,GPCPD1,TPP1,SYTL2,PDE8A,ANXA5,USP33,BICD1,NR1H3,PAN2,USP7,PLD6,TENC1,MTMR14,PTEN,RNASEK,PHPT1,PTP4A2,HERPUD1,PTPRF,PPP1R10,MEF2A,PARN,USP15,PTPRS,PTPRC,MTMR9,SEMA4D,TIMM50,USP54,CDC14B,ERCC1,PDIA5,REXO2,PTPRD,RGS2,PDGFRB,PTPN4,FARP1,USP40,YIF1A,PTPN23,TLN1,GSK3A,NLGN2,POLG,PPAP2A,PDIA3,ATXN3,ERI3,NTRK1,SPRED1,LMF1,DUSP6,PPT2,EGFL8,VARS,LARS,CES2,SSH1,EYA2,WNK1,PLA2G16 | 1.415114536 | 9.14E-05 |
| GO:0019941 | modification-dependent protein catabolic process | biological_process | USP10,CRBN,PSMB10,SIRT2,SPOP,UBXN1,SMAD7,USP4,HDAC6,DERL2,PSMB9,RAD23A,USP47,DNAJC10,ANAPC4,PLK1,HERC2,USP20,WAC,RNF8,MDM2,RHBDD1,NUB1,USP24,USP3,RNF168,RNF217,USP33,PAN2,USP7,CUL4A,CHFR,PTEN,FBXW7,HERPUD1,USP15,PSMC6,RNF146,PSMC4,OS9,TGFB1I1,USP54,WWP1,UBA6,MAN1B1,USP40,ATXN3,AMFR,PSMA1,CSNK1E,TSG101,UBR5 | 1.700429344 | 1.13E-04 |
| GO:0005856 | cytoskeleton | cellular_component | MARVELD1,USP10,OBFC1,XRN1,MYO1D,SIRT2,UTRN,RAI14,TARS,SEPT5,SLC16A3,GAS8,MMS19,SHMT2,CLNS1A,HDAC6,DYNC1I1,LANCL2,SYTL4,TTLL3,ARPC4-TTLL3,BCL2L11,STARD9,CEP135,MARK4,ADAM8,MAP7D1,CAPZB,RANBP1,SIPA1L1,KRIT1,MINK1,PDLIM5,RHOF,ACTR3,VASP,PRKACA,DHX9,PLK1,SDCCAG8,NUTF2,TTC19,DNM1L,HERC2,SEPT4,SYMPK,CNP,PLCB4,FLG,CCDC14,PDE4D,AFAP1,SHARPIN,DPF2,TCHP,KIAA0586,ZFYVE26,DIS3L,TLN2,INO80,SSH2,TRAF3IP1,FLII,DDX58,NUMA1,TPM4,MED28,PKD2,LMNA,PPP2R3C,RB1,GNAI1,NEXN,PAFAH1B1,CALCOCO2,DNALI1,CHMP1A,ARPC2,SYNE1,STK38L,ZNF263,BICD1,PLK2,NRP1,DAAM1,SAP30BP,MAST2,FYN,IQGAP1,CEP112,PXN,SRGAP2,NCOR1,TNS1,SMEK1,TCTN1,VILL,MYCBP2,CLTCL1,MYLK,ABCA2,RAB8A,CSK,CDK5RAP2,TBCD,DDHD2,FLOT1,KIFC2,GOPC,RANBP9,WDR35,PAK1,EVC,ACTR2,SS18,SMAD4,FNTB,KLC1,NAV1,TGFB1I1,EZR,MTRR,ZNF44,CLK3,DNHD1,FHOD1,FLNA,RAB5A,ACTR10,ADD3,AK5,GAPDH,PHF1,TBCE,NUP85,CTTN,HAUS5,CLIP2,PTPN4,DZIP1,CC2D2A,MYO7B,FARP1,LMNB1,LRPPRC,YIF1A,KIF13B,PTPN23,TLN1,PHC3,TTLL11,TWF1,NARF,MYO1E,CORO7,DYNC1I2,NUCB1,GPHN,PSMA1,TANC1,PSD3,CLIC4,BNIP2,SEPT2,THAP6,SSH1,C2CD3,CLASP1,CC2D1A | 1.307281589 | 1.25E-04 |
| GO:0033554 | cellular response to stress | biological_process | USP10,ACADVL,EIF2B4,PSMB10,IGF1R,TNRC6A,SUPT5H,BCL6,TBX2,MMS19,VAPB,HDAC6,VRK2,DERL2,PNKP,PSMB9,BCL2L11,XYLT1,XBP1,RAD23A,APITD1,USP47,ADAM8,DNAJC10,MINK1,IGBP1,NOD1,DHX9,PLK1,ASNS,UPF1,HDGF,NPC1,HERC2,POLM,SLC11A2,ATG4B,BCLAF1,TBC1D14,WAC,PMS1,TAB2,SGK1,RNF8,SEC31A,MDM2,RHBDD1,ZFYVE26,YY1,INO80,CREB1,PTPRK,ATG12,RPS6KA5,NIPBL,ALKBH3,PKD2,CASP2,SLC12A6,LMNA,MAPK8IP3,USP3,TP53BP1,RNF168,PAFAH1B1,IL18,TPP1,MUM1,USP7,CUL4A,FBXW7,HERPUD1,PXN,LTBR,NCOR1,MEF2A,FECH,SETD8,MAPK8,MYLK,TRIM28,MAP4K4,PSMC6,CDK6,PSMC4,PAK1,ZSWIM7,ACD,OS9,DGKZ,ALDH3B1,INO80E,ING4,CDC14B,MAPK12,ARNT,ERCC1,PHF1,NRBP2,PDIA5,MDFI,HINFP,RAD51B,YIF1A,TLN1,FGF14,GSK3A,POLG,PTGIS,ATXN3,AMFR,PDCD4,PSMA1,CSNK1E,NSMCE4A,SHPRH,SPRED1,TNFRSF10B,ATG3,HBB,DUSP6,RRP8,STK24,UBR5,EYA2,SMARCAD1 | 1.373423701 | 1.26E-04 |
| GO:0004672 | protein kinase activity | molecular_function | CDK14,ACADVL,IGF1R,RAF1,CDK13,ZFP91,EEF2K,VAPB,VRK2,XBP1,MARK4,UHMK1,ADAM8,MINK1,PTPN6,CSNK2A1,NOD1,PRKACA,PLK1,ASNS,HDGF,CCNL1,FAM58A,CAMK2D,TNK2,STK4,FGFR1,ADCY4,TAB2,SGK1,SEC31A,FKBP1A,PRKCH,PPM1F,CCNL2,NF1,NEK3,NPR1,RPS6KA5,PKD2,LMNA,RB1,LTBP4,MAPK8IP3,MARK3,TPP1,STK38L,SH3BP5,RGS3,PLK2,NRP1,MAST2,PTEN,FYN,SRPK1,IQGAP1,FBXW7,HERPUD1,IKBKB,PXN,PRKRIP1,STK19,MAPK8,MYLK,TRIM28,MAP4K4,CSK,PTPRC,CDK6,AAK1,PHKG2,PAK1,NCK2,TRPM7,CSF1R,CLK3,MAPK12,AK5,ENG,NOX4,NRBP2,STK36,PDIA5,MDFI,RGS2,PDGFRB,CDK11A,CARD14,MKNK2,YIF1A,CLK4,TLN1,ADRBK2,GSK3A,SIK3,TWF1,PRPF4B,IGF2,PDCD4,CRIPAK,CSNK1E,CDK5RAP1,NTRK1,SPRED1,TNFRSF10B,PHKG1,DUSP6,TGFBR3,PKD1,PDPK1,STK24,CDK5RAP3,GAK,FASTK,WNK1 | 1.395577473 | 1.30E-04 |
| GO:0043632 | modification-dependent macromolecule catabolic process | biological_process | USP10,CRBN,PSMB10,SIRT2,SPOP,UBXN1,SMAD7,USP4,HDAC6,DERL2,PSMB9,RAD23A,USP47,DNAJC10,ANAPC4,PLK1,HERC2,USP20,WAC,RNF8,MDM2,RHBDD1,NUB1,USP24,USP3,RNF168,RNF217,USP33,PAN2,USP7,CUL4A,CHFR,PTEN,FBXW7,HERPUD1,USP15,PSMC6,RNF146,PSMC4,OS9,TGFB1I1,USP54,WWP1,UBA6,MAN1B1,USP40,ATXN3,AMFR,PSMA1,CSNK1E,TSG101,UBR5 | 1.688137084 | 1.36E-04 |
| GO:0005788 | endoplasmic reticulum lumen | cellular_component | LEPRE1,COL9A1,COL2A1,H6PD,DNAJC10,COL16A1,COL14A1,RNASET2,COL12A1,SERPINH1,COL18A1,FKBP10,TXNDC5,EDEM2,COL9A3,OS9,P4HB,LRPAP1,PDIA5,COL8A1,CANX,SUMF2,PDIA3,COL13A1,KDELC2,CES2 | 2.178601929 | 1.37E-04 |
| GO:0035639 | purine ribonucleoside triphosphate binding | molecular_function | CDK14,DHX34,CKB,IGF1R,GK5,MYO1D,TARS,RAF1,NLRP1,SEPT5,CDK13,ATP2B1,RAB34,ERCC6L2,CMPK2,GBP3,EEF2K,PGS1,VRK2,NARS,LANCL2,DGKA,PNKP,STARD9,ABCC1,DDX23,MARK4,UHMK1,RAB35,DDX39A,SKIV2L,MINK1,RHOF,EEF1A1,ACTR3,CSNK2A1,NOD1,PRKACA,DHX9,PLK1,ASNS,DNM1L,UPF1,PDXK,RHOBTB1,CHD6,SEPT4,EFTUD2,RAB24,CAMK2D,GALK2,TNK2,STK4,MTG1,RARS,ALDH18A1,FGFR1,RAB18,NADSYN1,PMS1,ADCY4,SGK1,CHKB,NADK,PRKCH,IDH3G,INO80,NAGK,DDX58,MAGI1,NEK3,RTKN,NPR1,RPS6KA5,G3BP1,RAB31,NTPCR,UBE2Q1,GNAI1,MARK3,SLFN11,AACS,STK38L,DDX6,GARS,PLK2,MAST2,FYN,SRPK1,RUNX2,IKBKB,ATP11B,ERAL1,STK19,MAPK8,MYLK,DDX41,RNF213,ABCA2,RAB8A,MAP4K4,CSK,PSMC6,SWAP70,SKIV2L2,CDK6,FARSA,PSMC4,KIFC2,UBA2,AAK1,PHKG2,PAK1,RAB10,RHEB,TRPM7,CSF1R,DGKZ,ACTR2,DTYMK,CLK3,RAB5A,BCS1L,ATP5A1,MAPK12,AK5,NRBP2,STK36,ATP8B2,UBA6,NUBP1,PDGFRB,RAD51B,CDK11A,MYO7B,RAP1B,RUNX1,MKNK2,SMARCA4,DHX40,RAD54L2,KIF13B,CLK4,ADRBK2,GSK3A,SIK3,FPGS,TWF1,PRPF4B,MYO1E,PSTK,GPHN,ARL15,CHD2,RABL3,LONP2,CARS2,CSNK1E,NTRK1,SHPRH,PHKG1,UCK1,VARS,LARS,DHX37,SEPT2,PDPK1,STK24,GAK,RBKS,PANK3,FASTK,SMARCAD1,WNK1 | 1.296291636 | 1.37E-04 |
| GO:0035967 | cellular response to topologically incorrect protein | biological_process | ACADVL,VAPB,HDAC6,DERL2,XBP1,ASNS,HDGF,SEC31A,RHBDD1,LMNA,TPP1,HERPUD1,PDIA5,YIF1A,TLN1,GSK3A,ATXN3,AMFR | 2.607606289 | 1.43E-04 |
| GO:0016604 | nuclear body | cellular_component | CDK13,CBX5,SART1,ZNF496,SNRNP70,METTL3,PRPF40A,CCNL1,EFTUD2,FYTTD1,PRPF3,WAC,MDM2,CCNL2,RB1,SENP2,USP7,CHFR,PTEN,PIAS2,SRRM2,PRPF8,ATPAF2,TIMM50,SRSF10,CLK3,HINFP,TGS1,FAM76B,MKNK2,ZNF638,NCOR2,ACIN1,SON,PNISR,ZBTB16,LUC7L3,ZC3H14 | 1.865777036 | 1.46E-04 |
| GO:0090304 | nucleic acid metabolic process | biological_process | FZD6,USP10,RNASEH2B,OBFC1,PBX2,KANK2,ACADVL,GTF3C2,RAI1,PSMB10,XRN1,IGF1R,SIRT2,MYNN,NOC2L,TARS,ZNF131,RSC1A1,SFSWAP,CDK13,RBM6,SIN3B,CBX5,SART1,SUPT5H,SUPT20H,PWP1,BCL6,FUBP1,ZNF783,TBX2,MMS19,VAPB,CUX1,RBM17,CLNS1A,NUP98,EED,SMAD7,MCF2L,PPFIBP2,HDAC6,EHMT1,RNH1,ZNF496,TYW1B,NARS,LANCL2,PNKP,LEF1,PAX8,SUPT4H1,ZNF83,PSMB9,EMX2,RBPMS,ZSCAN31,XBP1,PAM,NOM1,SNRNP70,DDX23,RAD23A,METTL3,APITD1,USP47,ADAM8,NOL3,POLR3E,GABPB1,PRPF40A,PCGF6,DDX39A,SUGP1,EEF1A1,LHX4,CSNK2A1,IGBP1,UPF3A,NOD1,STAT2,RPP14,DHX9,PLK1,ZNF446,ASNS,PTGES2,UPF1,ZNF621,HDGF,RC3H1,PPP5C,CCNL1,HERC2,CHD6,ZC3H12A,POLM,SYMPK,EFTUD2,FAM58A,CNP,TBX18,LBX2,PCGF1,DR1,BCLAF1,ZNF721,ZNF397,JHDM1D,ZNF710,PRPF3,WAC,ZNF142,FUBP3,RARS,ZNF540,FGFR1,HSF4,PAIP1,GTF3C1,PMS1,CELF1,RNASET2,SF3A2,PAF1,TAB2,SGK1,DPF2,RNF8,SEC31A,MDM2,ZFYVE26,PRKCH,PPM1F,ZNF595,TBP,DIS3L,YY1,INO80,GMEB2,PFDN5,CREB1,FLII,RPRD1A,DDX58,RPL27,CCNL2,PTPRK,ZEB1,EIF4B,IFITM3,ASCC2,RGMB,EBF1,RPL9,MED28,ZNF3,RPS6KA5,G3BP1,NIPBL,ALKBH3,BRD9,ZNF837,PKD2,HNRNPA3,RXRB,LMNA,MITF,NOL8,RB1,PRMT5,USP3,MZF1,ZFPM2,TP53BP1,RNF168,ZNF865,SENP2,TPP1,SUB1,CHMP1A,PDE8A,NSA2,DDX6,ZNF558,MUM1,ZNF263,ZNF180,BICD1,ZNF276,NR1H3,GARS,PAN2,USP7,PLD6,FLCN,CUL4A,ZNF605,ZNF410,RPL24,RPL37A,SAP30BP,VPS72,PTEN,SRPK1,RNASEK,RUNX2,CSTF1,FBXW7,INTS4,SMARCD3,HERPUD1,IKBKB,RQCD1,KPNB1,RFX7,NCOR1,PPP1R10,MEF2A,PARN,SETD8,PIAS2,SSBP1,MAPK8,MYCBP2,USP15,DDX41,SRRM2,PBX3,ZNF565,ABCA2,AFF4,TRIM28,DMTF1,CDK5RAP2,PTPRC,PSMC6,SWAP70,UBP1,SKIV2L2,WDR61,EBF4,PRPF8,FARSA,ZNF148,ZNF76,PSMC4,HNRNPL,STAG2,SP110,PPA2,NCK2,HNRNPH3,ZSWIM7,TCF4,ACD,IKZF5,HMGN2,WDR4,SEMA4D,SSBP2,ERC1,NFYC,PIWIL4,RPUSD4,SRSF10,SS18,RCOR3,SMAD4,CHURC1,CHURC1-FNTB,ZNF114,MIER2,TGFB1I1,INO80E,RPL4,ZNF44,CREBZF,ING4,RBMS1,ZNF687,CDC14B,CLK3,NR2C2,FHOD1,FIP1L1,DNTTIP2,FLNA,IRF9,GLI3,MAPK12,CCDC59,DCAF6,THOC2,ENG,SIRT7,ZSCAN5A,TCF12,ARNT,NOX4,ZNF692,ERCC1,PHF1,STK36,WWP1,PHF12,PDIA5,REXO2,MED6,MDFI,ZNF554,NAA10,CIZ1,HINFP,NCBP2,MLX,PDGFRB,TGS1,NCAPD3,RAD51B,CDK11A,GLIS3,ELP6,BDP1,DBF4,RUNX1,SMARCA4,NAA16,LRPPRC,YIF1A,RPLP0,RAD54L2,CLASRP,ZNF518B,CRCP,CLK4,ZNF90,ZNF638,PER3,TLN1,CHTF8,GSK3A,SNRPE,POLG,ZNF383,POLR2J3,NCOR2,SETD2,PRPF4B,IGF2,PTGIS,FTSJ3,TROVE2,ATXN3,PSTK,PHF21A,PDCD4,SOX13,ERI3,CHD2,PSMA1,STAT6,CARS2,ACIN1,CSNK1E,SON,ZNF138,ZNF705A,CDK5RAP1,NSMCE4A,NTRK1,TFAM,SHPRH,BRWD1,SMAD9,TGFBR3,ZFC3H1,ZBTB16,BAZ2A,RRP8,VARS,LARS,PHF19,LMCD1,LUC7L3,PKD1,PDPK1,TSG101,USF1,FOXC1,ARL6IP4,KPNA1,HEMK1,CDK5RAP3,MTO1,PABPC1,UBR5,FASTK,EYA2,SMARCAD1,CC2D1A,GATA2,PABPN1 | 1.158163587 | 1.61E-04 |
| GO:0044451 | nucleoplasm part | cellular_component | PBX2,GTF3C2,CDK13,CBX5,SART1,SUPT5H,SUPT20H,TBX2,MMS19,EED,SMAD7,HDAC6,ZNF496,LEF1,SUPT4H1,SNRNP70,METTL3,APITD1,PRPF40A,CSNK2A1,HDGF,CCNL1,EFTUD2,DR1,FYTTD1,PRPF3,WAC,GTF3C1,PAF1,MDM2,TBP,YY1,CREB1,RPRD1A,CCNL2,ZEB1,MED28,PHF15,RB1,SENP2,SUB1,USP7,CHFR,PTEN,RUNX2,INTS4,NCOR1,PIAS2,SRRM2,PBX3,WDR61,PRPF8,APPL2,ATPAF2,TCF4,TIMM50,NFYC,SRSF10,SMAD4,ING4,CLK3,FIP1L1,MSL1,GLI3,TCF12,ARNT,PHF1,PHF12,MED6,HINFP,TGS1,FAM76B,MKNK2,NAA16,ZNF638,NCOR2,KANSL3,PHF21A,ACIN1,SON,PNISR,SMAD9,ZBTB16,PHF19,LUC7L3,USF1,FOXC1,ZC3H14 | 1.462485563 | 1.86E-04 |
| GO:0016301 | kinase activity | molecular_function | CDK14,ACADVL,CKB,IGF1R,GK5,RAF1,CDK13,CMPK2,ZFP91,EEF2K,VAPB,VRK2,DGKA,PNKP,XBP1,MARK4,UHMK1,ADAM8,MINK1,PTPN6,CSNK2A1,NOD1,PRKACA,PLK1,ASNS,HDGF,PDXK,CCNL1,FAM58A,CAMK2D,GALK2,TNK2,STK4,ALDH18A1,FGFR1,ADCY4,TAB2,SGK1,CHKB,NADK,SEC31A,FKBP1A,PRKCH,PPM1F,NAGK,CCNL2,NF1,NEK3,NPR1,RPS6KA5,PKD2,LMNA,RB1,HMGXB3,LTBP4,MAPK8IP3,MARK3,TPP1,STK38L,SH3BP5,RGS3,PLK2,NRP1,MAST2,PTEN,FYN,SRPK1,IQGAP1,FBXW7,HERPUD1,IKBKB,PXN,PRKRIP1,STK19,MAPK8,MYLK,TRIM28,MAP4K4,CSK,PTPRC,CDK6,AAK1,PHKG2,PAK1,NCK2,TRPM7,CSF1R,DGKZ,DTYMK,CLK3,MAPK12,AK5,ENG,NOX4,NRBP2,STK36,PDIA5,MDFI,RGS2,PDGFRB,CDK11A,CARD14,MKNK2,YIF1A,CLK4,TLN1,ADRBK2,GSK3A,SIK3,TWF1,PRPF4B,IGF2,PSTK,PDCD4,CRIPAK,CSNK1E,CDK5RAP1,NTRK1,SPRED1,TNFRSF10B,PHKG1,DUSP6,TGFBR3,UCK1,PKD1,PDPK1,STK24,CDK5RAP3,GAK,RBKS,PANK3,FASTK,WNK1 | 1.346626281 | 1.89E-04 |
| GO:0031324 | negative regulation of cellular metabolic process | biological_process | KANK2,ACADVL,EIF2B4,PSMB10,IGF1R,TNRC6A,SIRT2,NOC2L,SFSWAP,SIN3B,CBX5,SUPT5H,UBXN1,BCL6,TBX2,CUX1,EED,FMR1,SMAD7,USP4,HDAC6,EHMT1,ZNF496,LANCL2,LEF1,SUPT4H1,PSMB9,USP47,DNAJC10,PCGF6,PTPN6,IGBP1,ANAPC4,PLK1,HDGF,NPC1,ZC3H12A,CLN8,TBX18,DR1,BCLAF1,GIGYF2,TBC1D14,WAC,ZNF540,FGFR1,HSF4,CAPRIN1,CELF1,PAF1,RNF8,MDM2,PPM1F,YY1,PFDN5,CREB1,SRP9,PTPRK,NF1,ZEB1,IFITM3,RPS6KA5,NIPBL,RB1,PRMT5,ZFPM2,RNF168,CHMP1A,SH3BP5,ZNF263,RGS3,NR1H3,GRB10,FLCN,VPS72,PTEN,RUNX2,IQGAP1,FBXW7,NCOR1,MEF2A,PRKRIP1,SETD8,TRIM28,PTPRC,PSMC6,UBP1,ZNF148,PSMC4,STAG2,TCF4,ACD,SEMA4D,SRSF10,SMAD4,C1QTNF3,CREBZF,ING4,CD276,GLI3,ENG,SIRT7,GAPDH,ERCC1,PHF1,NRBP2,WWP1,PHF12,MDFI,CIRBP,RGS2,HINFP,LPCAT1,MLX,GLIS3,SMARCA4,PER3,GSK3A,NCOR2,PTGIS,PHF21A,PDCD4,CRIPAK,PSMA1,STAT6,CDK5RAP1,SPRED1,DUSP6,ZBTB16,BAZ2A,RRP8,LMCD1,PDPK1,TSG101,PABPC1,UBR5,WNK1,CC2D1A,GATA2 | 1.333829 | 2.11E-04 |
| GO:0043001 | Golgi to plasma membrane protein transport | biological_process | VAMP7,BBS1,RAB31,GCC2,CSK,GOPC,RAB10,VAMP4 | 4.490877498 | 2.26E-04 |
| GO:0006468 | protein phosphorylation | biological_process | CDK14,ACADVL,IGF1R,RAF1,CDK13,ST3GAL1,ZFP91,CNTF,EEF2K,VAPB,SMAD7,VRK2,RBPMS,XBP1,MARK4,UHMK1,ADAM8,DNAJC10,MINK1,PTPN6,CSNK2A1,NOD1,PRKACA,PLK1,ASNS,HDGF,CCNL1,FAM58A,CAMK2D,TNK2,STK4,FGFR1,ADCY4,TAB2,SGK1,SEC31A,FKBP1A,PRKCH,PPM1F,CREB1,NPTN,CCNL2,NF1,NEK3,NPR1,RPS6KA5,PKD2,LMNA,RB1,LTBP4,MAPK8IP3,MARK3,SENP2,TPP1,STK38L,SH3BP5,RGS3,PLK2,FLCN,NRP1,MAST2,PTEN,FYN,SRPK1,IQGAP1,FBXW7,HERPUD1,IKBKB,PXN,FECH,PRKRIP1,STK19,MAPK8,MYLK,USP15,TRIM28,MAP4K4,CSK,PTPRC,CDK6,AAK1,PHKG2,PAK1,NCK2,TRPM7,SEMA4D,CSF1R,ERC1,C3,SMAD4,CLK3,MAPK12,AK5,ENG,NOX4,NRBP2,STK36,PDIA5,MDFI,ITGA5,RGS2,PDGFRB,CDK11A,CARD14,TNFRSF14,MKNK2,YIF1A,CLK4,TLN1,ADRBK2,GSK3A,SIK3,TWF1,PRPF4B,IGF2,PDCD4,CRIPAK,CSNK1E,CDK5RAP1,NTRK1,SPRED1,TNFRSF10B,PHKG1,SMAD9,DUSP6,TGFBR3,PKD1,PDPK1,STK24,CDK5RAP3,GAK,FASTK,WNK1 | 1.341212666 | 2.30E-04 |
| GO:0004725 | protein tyrosine phosphatase activity | molecular_function | PTPN22,PTPN6,SSH2,PTPRK,MDP1,MTMR14,PTEN,PTP4A2,PTPRF,PTPRS,PTPRC,TIMM50,CDC14B,PTPRD,PTPN4,PTPN23,DUSP6,SSH1,EYA2 | 2.444080897 | 2.30E-04 |
| GO:0019222 | regulation of metabolic process | biological_process | FZD6,USP10,OBFC1,RAB3GAP2,PBX2,KANK2,ACADVL,EIF2B4,RAI1,PSMB10,IGF1R,PTS,TNRC6A,MYO1D,SIRT2,EPHX2,RALGAPA2,MYNN,TRNAU1AP,NOC2L,RAF1,NLRP1,ZNF131,RSC1A1,SFSWAP,CDK13,BDNF,SIN3B,CBX5,COL2A1,SUPT5H,SUPT20H,UBXN1,BCL6,FUBP1,ZNF783,TBX2,MMS19,ZFP91,CNTF,EEF2K,VAPB,CUX1,EED,FMR1,SMAD7,MCF2L,USP4,HDAC6,GLG1,ARHGEF12,EHMT1,RNH1,ZNF496,HGS,LANCL2,LEF1,PAX8,SUPT4H1,ZNF83,PSMB9,EMX2,ARHGEF25,RGL4,BCL2L13,BCL2L11,RBPMS,STARD13,ZSCAN31,XBP1,PAM,SNRNP70,RAD23A,APITD1,UHMK1,USP47,ADAM8,GABPB1,DNAJC10,PCGF6,RANBP1,SIPA1L1,KRIT1,MINK1,PTPN6,EEF1A1,LHX4,CSNK2A1,IGBP1,UPF3A,NOD1,PRKACA,STAT2,ANAPC4,DHX9,PLK1,ZNF446,ASNS,TBC1D2B,PTGES2,UPF1,ZNF621,HDGF,RC3H1,NPC1,CCNL1,HERC2,CHD6,ZC3H12A,TBC1D10B,SEPT4,SLC11A2,SYMPK,FAM58A,ATG4B,CLN8,TBX18,LBX2,PCGF1,DR1,BCLAF1,ZNF721,ZNF397,JHDM1D,ZNF710,GIGYF2,TBC1D14,TNK2,GIT2,WAC,STK4,ZNF142,FUBP3,ZNF540,FGFR1,HPS4,HSF4,C2,CFB,PAIP1,CAPRIN1,MMP16,ADCY4,CELF1,PAF1,TAB2,SGK1,PLEKHG4,DPF2,CPT1B,RNF8,SEC31A,MDM2,RHBDD1,FKBP1A,PRKCH,PPM1F,ZNF595,TBP,YY1,FAM13A,INO80,GMEB2,PFDN5,CREB1,NPTN,SRP9,RALGPS2,FLII,PLEKHG5,RPRD1A,DDX58,ZCCHC9,CCNL2,PTPRK,SNX13,RHBDF1,SERPINH1,NF1,ZEB1,EIF4B,CRIP1,SERBP1,NUB1,IFITM3,ASCC2,RGMB,RTKN,EBF1,MED28,NPR1,ZNF3,RPS6KA5,NIPBL,ALKBH3,BRD9,ZNF837,PKD2,RXRB,LMNA,MITF,RB1,PRMT5,LTBP4,MAPK8IP3,USP3,MZF1,ZFPM2,TP53BP1,RNF168,PAFAH1B1,ZNF865,SENP2,IL18,PUM2,MTCH1,TPP1,SYTL2,SUB1,CHMP1A,PDE8A,ACAP2,ZNF558,ANXA5,SH3BP5,ZNF263,ZNF180,BICD1,ZNF276,RGS3,NR1H3,CYTH2,GRB10,USP7,PLD6,FLCN,NRP1,CUL4A,ZNF605,ZNF410,ARHGAP9,SAP30BP,MAST2,VPS72,PTEN,FYN,SRPK1,RUNX2,IQGAP1,FBXW7,PHPT1,SMARCD3,HERPUD1,IKBKB,RQCD1,PXN,SRGAP2,RFX7,NCOR1,PPP1R10,MEF2A,FECH,PRKRIP1,SETD8,SMEK1,NECAB3,PIAS2,SSBP1,MAPK8,MYCBP2,UPK3B,USP15,DDX41,PBX3,ZNF565,ABCA2,AFF4,TRIM28,DENND4C,DMTF1,MAP4K4,CSK,CDK5RAP2,PTPRC,OAZ1,PSMC6,TBCD,UBP1,CDK6,WDR61,EBF4,ZNF148,ZNF76,PSMC4,ARHGAP29,SGSM3,STAG2,UBA2,AAK1,SP110,GOPC,PHKG2,PAK1,NCK2,LEPR,MTMR9,CTSH,ZSWIM7,TCF4,ACD,IKZF5,HMGN2,SEMA4D,SSBP2,CSF1R,ERC1,DGKZ,C3,NFYC,PIWIL4,SRSF10,SS18,RCOR3,SMAD4,GRPEL2,CHURC1,CHURC1-FNTB,TBC1D22A,ZNF114,MIER2,C1QTNF3,TGFB1I1,DDAH1,INO80E,ZNF44,CREBZF,ING4,CD276,ZNF687,CDC14B,CLK3,NR2C2,FHOD1,DNTTIP2,FLNA,IRF9,GLI3,TMED2,MAPK12,CCDC59,DCAF6,RASGRF2,AK5,ENG,SIRT7,ZSCAN5A,TCF12,ARNT,NOX4,ZNF692,GAPDH,ERCC1,PHF1,NRBP2,STK36,WWP1,ARHGEF7,PHF12,PDIA5,ASAP1,MED6,MDFI,CIRBP,ZNF554,CIZ1,ITGA5,RGS2,HINFP,NCBP2,LPCAT1,MLX,PDGFRB,TGS1,CDK11A,GLIS3,ELP6,CARD14,BDP1,DIABLO,FARP1,TNFRSF14,DBF4,RUNX1,MKNK2,SMARCA4,NAA16,LRPPRC,YIF1A,RAD54L2,ZNF518B,CLK4,ZNF90,ZNF638,PER3,TLN1,DOCK8,GSK3A,ZNF383,NCOR2,SETD2,TWF1,PPAP2A,IGF2,PTGIS,ATXN3,PSTK,PHF21A,PDCD4,SOX13,RGL2,CHD2,CRIPAK,LONP2,PSMA1,STAT6,PSD3,CSNK1E,SON,ZNF138,ZNF705A,CDK5RAP1,BNIP2,NTRK1,TFAM,SPRED1,TNFRSF10B,BRWD1,SMAD9,HBB,LMF1,DUSP6,TGFBR3,ZBTB16,BAZ2A,CPAMD8,RRP8,VARS,LARS,PHF19,LMCD1,SEPT2,PKD1,PDPK1,TSG101,USF1,FOXC1,KPNA1,DDAH2,HEMK1,SSH1,CDK5RAP3,RAPGEF6,C2CD3,PABPC1,UBR5,FASTK,EYA2,SMARCAD1,WNK1,CC2D1A,DENND6B,GATA2 | 1.133930552 | 2.35E-04 |
| GO:0035335 | peptidyl-tyrosine dephosphorylation | biological_process | PTPN22,PTPN6,SSH2,PTPRK,MDP1,MTMR14,PTEN,PTP4A2,PTPRF,PTPRS,PTPRC,TIMM50,CDC14B,PTPRD,PTPN4,PTPN23,DUSP6,SSH1,EYA2 | 2.437904927 | 2.38E-04 |
| GO:0016772 | transferase activity, transferring phosphorus-containing groups | molecular_function | CDK14,ACADVL,CKB,IGF1R,GK5,RAF1,CDK13,CMPK2,ZFP91,EEF2K,VAPB,PGS1,VRK2,DGKA,PNKP,XBP1,MARK4,UHMK1,ADAM8,POLR3E,MINK1,PTPN6,CSNK2A1,NOD1,PRKACA,PLK1,ASNS,HDGF,PIGG,PDXK,CCNL1,POLM,FAM58A,CAMK2D,GALK2,TNK2,STK4,ALDH18A1,FGFR1,ADCY4,TAB2,SGK1,CHKB,NADK,SEC31A,FKBP1A,PRKCH,PPM1F,NAGK,CCNL2,NF1,NEK3,NPR1,RPS6KA5,PKD2,GALT,LMNA,RB1,HMGXB3,LTBP4,MAPK8IP3,MARK3,TPP1,STK38L,SH3BP5,RGS3,PLK2,NRP1,MAST2,PTEN,FYN,SRPK1,IQGAP1,FBXW7,HERPUD1,IKBKB,PXN,PRKRIP1,STK19,MAPK8,MYLK,TRIM28,MAP4K4,CSK,PTPRC,CDK6,AAK1,PHKG2,PAK1,NCK2,ACD,TRPM7,CSF1R,DGKZ,DTYMK,CLK3,MAPK12,AK5,ENG,NOX4,NRBP2,STK36,PDIA5,MDFI,RGS2,PDGFRB,CDK11A,CARD14,MKNK2,YIF1A,CRCP,CLK4,TLN1,ADRBK2,GSK3A,SIK3,POLG,POLR2J3,TWF1,PCYT1A,PRPF4B,IGF2,PSTK,PDCD4,CRIPAK,CSNK1E,CDK5RAP1,NTRK1,SPRED1,TNFRSF10B,PHKG1,DUSP6,TGFBR3,UCK1,PKD1,PDPK1,STK24,CDK5RAP3,GAK,RBKS,PANK3,FASTK,WNK1 | 1.316610148 | 2.96E-04 |
| GO:0051651 | maintenance of location in cell | biological_process | GPAA1,TLN2,PKD2,RB1,SYNE1,BICD1,GCC2,GOPC,OS9,EZR,FLNA,SUN2,GAA,MDFI,CIZ1,TLN1,PDIA3,PKD1,CLASP1 | 2.392336611 | 3.06E-04 |
| GO:0060255 | regulation of macromolecule metabolic process | biological_process | FZD6,OBFC1,PBX2,KANK2,ACADVL,EIF2B4,RAI1,PSMB10,IGF1R,TNRC6A,SIRT2,EPHX2,MYNN,TRNAU1AP,NOC2L,RAF1,ZNF131,RSC1A1,SFSWAP,CDK13,SIN3B,CBX5,COL2A1,SUPT5H,SUPT20H,UBXN1,BCL6,FUBP1,ZNF783,TBX2,MMS19,ZFP91,CNTF,EEF2K,VAPB,CUX1,EED,FMR1,SMAD7,MCF2L,USP4,HDAC6,GLG1,EHMT1,ZNF496,HGS,LANCL2,LEF1,PAX8,SUPT4H1,ZNF83,PSMB9,EMX2,RBPMS,ZSCAN31,XBP1,PAM,SNRNP70,RAD23A,APITD1,UHMK1,USP47,ADAM8,GABPB1,DNAJC10,PCGF6,PTPN6,EEF1A1,LHX4,CSNK2A1,IGBP1,UPF3A,NOD1,PRKACA,STAT2,ANAPC4,DHX9,PLK1,ZNF446,ASNS,PTGES2,UPF1,ZNF621,HDGF,RC3H1,CCNL1,CHD6,ZC3H12A,SEPT4,SYMPK,FAM58A,CLN8,TBX18,LBX2,PCGF1,DR1,BCLAF1,ZNF721,ZNF397,JHDM1D,ZNF710,GIGYF2,TNK2,WAC,STK4,ZNF142,FUBP3,ZNF540,FGFR1,HPS4,HSF4,C2,CFB,PAIP1,CAPRIN1,ADCY4,CELF1,PAF1,TAB2,SGK1,DPF2,RNF8,SEC31A,MDM2,RHBDD1,FKBP1A,PRKCH,PPM1F,ZNF595,TBP,YY1,INO80,GMEB2,PFDN5,CREB1,NPTN,SRP9,FLII,RPRD1A,DDX58,CCNL2,PTPRK,RHBDF1,SERPINH1,NF1,ZEB1,EIF4B,CRIP1,SERBP1,NUB1,IFITM3,ASCC2,RGMB,EBF1,MED28,ZNF3,RPS6KA5,NIPBL,ALKBH3,BRD9,ZNF837,PKD2,RXRB,LMNA,MITF,RB1,PRMT5,LTBP4,MAPK8IP3,USP3,MZF1,ZFPM2,TP53BP1,RNF168,ZNF865,SENP2,IL18,PUM2,TPP1,SUB1,CHMP1A,PDE8A,ZNF558,SH3BP5,ZNF263,ZNF180,BICD1,ZNF276,RGS3,NR1H3,GRB10,USP7,PLD6,FLCN,NRP1,CUL4A,ZNF605,ZNF410,SAP30BP,MAST2,VPS72,PTEN,FYN,SRPK1,RUNX2,IQGAP1,FBXW7,SMARCD3,HERPUD1,IKBKB,RQCD1,PXN,RFX7,NCOR1,MEF2A,FECH,PRKRIP1,SETD8,NECAB3,PIAS2,MAPK8,MYCBP2,UPK3B,USP15,DDX41,PBX3,ZNF565,ABCA2,AFF4,TRIM28,DMTF1,CSK,CDK5RAP2,PTPRC,PSMC6,UBP1,CDK6,WDR61,EBF4,ZNF148,ZNF76,PSMC4,SGSM3,STAG2,AAK1,SP110,PHKG2,PAK1,NCK2,CTSH,ZSWIM7,TCF4,ACD,IKZF5,HMGN2,SEMA4D,SSBP2,CSF1R,ERC1,C3,NFYC,PIWIL4,SRSF10,SS18,RCOR3,SMAD4,CHURC1,CHURC1-FNTB,ZNF114,MIER2,C1QTNF3,TGFB1I1,INO80E,ZNF44,CREBZF,ING4,CD276,ZNF687,CDC14B,CLK3,NR2C2,FHOD1,DNTTIP2,FLNA,IRF9,GLI3,TMED2,MAPK12,CCDC59,DCAF6,AK5,ENG,SIRT7,ZSCAN5A,TCF12,ARNT,NOX4,ZNF692,GAPDH,ERCC1,PHF1,STK36,WWP1,PHF12,PDIA5,MED6,MDFI,CIRBP,ZNF554,CIZ1,ITGA5,RGS2,HINFP,NCBP2,LPCAT1,MLX,PDGFRB,TGS1,CDK11A,GLIS3,ELP6,CARD14,BDP1,TNFRSF14,RUNX1,MKNK2,SMARCA4,NAA16,LRPPRC,YIF1A,RAD54L2,ZNF518B,CLK4,ZNF90,ZNF638,PER3,TLN1,GSK3A,ZNF383,NCOR2,SETD2,TWF1,IGF2,PTGIS,ATXN3,PSTK,PHF21A,PDCD4,SOX13,CHD2,CRIPAK,PSMA1,STAT6,CSNK1E,SON,ZNF138,ZNF705A,CDK5RAP1,NTRK1,TFAM,SPRED1,TNFRSF10B,BRWD1,SMAD9,DUSP6,TGFBR3,ZBTB16,BAZ2A,RRP8,VARS,LARS,PHF19,LMCD1,PKD1,PDPK1,TSG101,USF1,FOXC1,KPNA1,HEMK1,SSH1,CDK5RAP3,C2CD3,PABPC1,UBR5,FASTK,EYA2,SMARCAD1,WNK1,CC2D1A,GATA2 | 1.153448501 | 3.10E-04 |
| GO:0000904 | cell morphogenesis involved in differentiation | biological_process | FZD6,IGF1R,LAMB1,RAF1,COL9A1,BDNF,COL2A1,SMAD7,ARHGEF12,CD72,LEF1,PAX8,ITGA9,SIPA1L1,MINK1,PDLIM5,ACTR3,LHX4,VASP,CSNK2A1,SLC11A2,CNP,FGFR1,CAPRIN1,SSH2,CREB1,RGMB,COL18A1,RPS6KA5,RB1,MAPK8IP3,PAFAH1B1,ARPC2,ADAM15,USP33,HEXA,NRP1,PTEN,FYN,SRGAP2,MEF2A,TCTN1,CACNB1,MYCBP2,RAB8A,TRIM28,COL9A3,PTPRC,FLOT1,RANBP9,PAK1,NCK2,RAB10,SEMA6A,SEMA4D,ROBO3,SMAD4,TGFB1I1,EZR,FLNA,GLI3,EXT1,TBCE,UNC5B,PTPRD,ITGA5,FARP1,KIF13B,TLN1,ROBO2,CACNB3,CLIC4,NTRK1,TGFBR3,FOXC1,STK24,SSH1,CLASP1 | 1.473864424 | 3.28E-04 |
| GO:0030934 | anchoring collagen | cellular_component | COL9A1,COL16A1,COL14A1,COL12A1,COL9A3 | 6.996663887 | 3.44E-04 |
| GO:0005794 | Golgi apparatus | cellular_component | PLEKHA3,XRN1,EPHX2,PPIL2,GAS8,RSC1A1,CPE,SART1,CCDC91,RAB34,HLA-DPB1,ST3GAL1,PLD1,VAPB,CUX1,SMPD4,GLG1,IL15RA,HLA-C,XYLT1,COG4,ABCC1,HLA-DQA1,AP3S2,MINK1,RNF24,ACTR3,VPS52,LMAN2,DNM1L,PTGES2,PPP5C,NPC1,VAMP7,TBC1D14,VTI1A,MMP16,SNAP23,MCFD2,QSOX1,AP4B1,RHBDF1,RAB31,ST3GAL4,GCNT2,GALT,UBAC1,GOLGA8B,GOLGA8A,MAPK8IP3,GNAI1,STX16,CALCOCO2,SYTL2,ARPC2,SYNE1,GALNT2,BICD1,GCC2,IGFBP6,UST,FBXW7,SNX17,DYM,NECAB3,CLSTN2,CLTCL1,MAN1A2,HLA-F,RAB8A,SLC35D2,CSK,CDK5RAP2,STX18,NSFL1C,DDHD2,ZNF148,CLTB,GOPC,ST6GALNAC5,PAK1,LEPROT,RAB10,VPS45,ATP6V0A1,ERC1,FUT4,TMED3,SLC35A4,GOLPH3,MGAT5,TMED2,B4GALT4,SCFD1,PCSK7,EXT1,VTI1B,B3GAT3,VAMP4,MAN2A2,LPCAT1,VPS51,YIF1A,ZNF90,CORO7,CORO7-PAM16,NUCB1,LMF1,SLC9A8,ACAN,SCAMP1,FMOD,GAK,CLASP1,GORASP1 | 1.36375652 | 3.45E-04 |
| GO:0035861 | site of double-strand break | cellular_component | RNF8,RNF168,PHF1,SMARCAD1 | 9.328885182 | 3.46E-04 |
| GO:0060271 | cilium morphogenesis | biological_process | NPHP3,TTLL3,ACTR3,BBS1,KIAA0586,IFT172,TCTN1,RAB8A,WDR35,FLNA,STK36,ASAP1,DZIP1,CC2D2A,PTPN23,TROVE2,TMEM237,SEPT2,C2CD3 | 2.370185346 | 3.47E-04 |
| GO:0006996 | organelle organization | biological_process | OBFC1,SIRT2,NOC2L,RAF1,CDK13,TAZ,RAB34,SUPT5H,MARCH5,BCL6,NUP98,EED,HDAC6,EHMT1,ATP6V1D,TTLL3,ARPC4-TTLL3,LEF1,SUPT4H1,BCL2L11,STARD9,COG4,NISCH,PAM,CEP135,APITD1,MARK4,CAPZB,PRPF40A,RANBP1,SIPA1L1,MINK1,RHOF,ACTR3,VASP,ANAPC4,PLK1,TTC19,DNM1L,PPP5C,CHD6,SEPT4,ATG4B,CNP,CLN8,PCGF1,VAMP7,DR1,JHDM1D,TBC1D14,WAC,HPS4,HSF4,TIMM23,PAF1,SHARPIN,RNF8,SEC31A,ANAPC16,PPM1F,YY1,TLN2,INO80,SSH2,LIMCH1,NF1,NEK3,ATG12,NUMA1,PHF15,RPS6KA5,NIPBL,RAB31,BRD9,CAPN10,PKD2,LMNA,RB1,PRMT5,GNAI1,USP3,BLOC1S5,NEXN,RNF168,PAFAH1B1,TPP1,CHMP1A,ARPC2,SYNE1,MUM1,BICD1,NTMT1,GCC2,CYTH2,PLK2,HEXA,PLD6,FLCN,CHFR,DAAM1,VPS72,PTEN,SRPK1,FBXW7,PHPT1,SMARCD3,PXN,SRGAP2,NCOR1,MEF2A,DYM,ERAL1,SETD8,WASH4P,SSBP1,VILL,MAPK8,MYCBP2,CLTCL1,RAB8A,CDK5RAP2,ITPA,TBCD,DSN1,WDR61,NUP37,COX14,STAG2,GOPC,RANBP9,PAK1,NCK2,RAB10,SEMA6A,ACD,TRPM7,HMGN2,CSF1R,ATP6V0A1,TIMM50,ACTR2,SS18,GRPEL2,NAV1,EZR,CENPT,GOLPH3,ING4,CDCA3,HPS3,FHOD1,FLNA,SUN2,MSL1,BCS1L,TMED2,SIRT7,NOX4,GAPDH,ERCC1,PHF1,GAA,SLC25A6,TBCE,NUP85,HAUS5,PDGFRB,NCAPD3,CDK11A,SMARCA4,SDAD1,TLN1,POLG,SETD2,TWF1,KANSL3,IGF2,ATXN3,CORO7,MAU2,PHF21A,CRIPAK,LONP2,ACIN1,SON,CLIC4,BNIP2,TFAM,SHPRH,ATG3,BRWD1,BAZ2A,RRP8,PHF19,LETM1,SEPT2,SENP6,PDPK1,SSH1,MTO1,UBR5,EYA2,SMARCAD1,CLASP1,GATA2,GORASP1 | 1.24288504 | 3.60E-04 |
| GO:0008380 | RNA splicing | biological_process | SFSWAP,CDK13,SART1,RBM17,CLNS1A,SNRNP70,DDX23,NOL3,PRPF40A,DDX39A,SUGP1,DHX9,EFTUD2,PRPF3,CELF1,SF3A2,HNRNPA3,PRMT5,SRPK1,CSTF1,DDX41,SRRM2,SKIV2L2,PRPF8,HNRNPL,HNRNPH3,SRSF10,CLK3,THOC2,NCBP2,TGS1,CLASRP,CLK4,ZNF638,SNRPE,PRPF4B,SON,LUC7L3,ARL6IP4,PABPC1,FASTK,PABPN1 | 1.725154161 | 3.67E-04 |
| GO:0030020 | extracellular matrix structural constituent conferring tensile strength | molecular_function | COL9A1,COL2A1,COL12A1,COL9A3 | 9.004508566 | 3.97E-04 |
| GO:0032446 | protein modification by small protein conjugation | biological_process | CRBN,PSMB10,PPIL2,SPOP,MARCH5,UBXN1,FBXO32,ZFP91,SMAD7,USP4,HDAC6,PSMB9,APITD1,RNF220,MARCH6,ANAPC4,PLK1,RC3H1,HERC2,SEPT4,MIB2,PCGF1,DCAF11,WAC,PAF1,SHARPIN,RNF8,MDM2,FKBP1A,ANAPC16,NUB1,SPSB3,UNKL,DCAF8,UBE2Q1,UBAC1,RNF168,RNF217,CUL4A,CHFR,PTEN,FBXW7,HERPUD1,PIAS2,MYCBP2,RNF213,TRIM28,PSMC6,RNF146,PSMC4,UBA2,OS9,ASB8,CDCA3,CDC14B,DCAF6,ARNT,WWP1,UBA6,TRIM41,DCAF17,KLHL7,FBXW2,AMFR,PSMA1,SHPRH,ATG3,ZBTB16,SENP6,UBR5 | 1.499339069 | 4.05E-04 |
| GO:0071826 | ribonucleoprotein complex subunit organization | biological_process | SFSWAP,SART1,CLNS1A,DDX23,RC3H1,CELF1,SF3A2,PIH1D1,PRMT5,PUM2,DDX6,BICD1,PLD6,ERAL1,SRSF10,KLC1,CIRBP,NCBP2,TGS1,SNRPE | 2.283497033 | 4.07E-04 |
| GO:0010605 | negative regulation of macromolecule metabolic process | biological_process | KANK2,EIF2B4,PSMB10,IGF1R,TNRC6A,SIRT2,NOC2L,SFSWAP,SIN3B,CBX5,SUPT5H,UBXN1,BCL6,TBX2,CUX1,EED,FMR1,SMAD7,USP4,HDAC6,GLG1,EHMT1,ZNF496,LANCL2,LEF1,SUPT4H1,PSMB9,USP47,DNAJC10,PCGF6,PTPN6,IGBP1,ANAPC4,PLK1,HDGF,ZC3H12A,CLN8,TBX18,DR1,BCLAF1,GIGYF2,WAC,ZNF540,FGFR1,HSF4,CAPRIN1,CELF1,PAF1,RNF8,MDM2,PPM1F,YY1,PFDN5,CREB1,SRP9,PTPRK,NF1,ZEB1,IFITM3,RPS6KA5,NIPBL,RB1,PRMT5,ZFPM2,RNF168,CHMP1A,SH3BP5,ZNF263,RGS3,NR1H3,GRB10,FLCN,VPS72,PTEN,FYN,RUNX2,FBXW7,NCOR1,MEF2A,PRKRIP1,SETD8,UPK3B,TRIM28,PTPRC,PSMC6,UBP1,ZNF148,PSMC4,STAG2,TCF4,ACD,SEMA4D,PIWIL4,SRSF10,SMAD4,C1QTNF3,CREBZF,ING4,CD276,FLNA,GLI3,ENG,SIRT7,GAPDH,ERCC1,PHF1,WWP1,PHF12,MDFI,CIRBP,RGS2,HINFP,NCBP2,MLX,GLIS3,SMARCA4,PER3,GSK3A,NCOR2,PHF21A,PDCD4,CRIPAK,PSMA1,STAT6,CDK5RAP1,SPRED1,DUSP6,ZBTB16,BAZ2A,RRP8,LMCD1,PDPK1,TSG101,PABPC1,UBR5,WNK1,CC2D1A,GATA2 | 1.313938717 | 4.25E-04 |
| GO:0016310 | phosphorylation | biological_process | CDK14,ACADVL,CKB,IGF1R,GK5,SIRT2,RAF1,CDK13,BDNF,TAZ,ST3GAL1,CMPK2,ZFP91,CNTF,EEF2K,VAPB,SMAD7,VRK2,DGKA,PNKP,RBPMS,XBP1,MARK4,UHMK1,ADAM8,DNAJC10,MINK1,PTPN6,CSNK2A1,NOD1,PRKACA,PLK1,ASNS,HDGF,PDXK,CCNL1,FAM58A,CAMK2D,GALK2,TNK2,STK4,ALDH18A1,FGFR1,ADCY4,TAB2,SGK1,CHKB,NADK,SEC31A,FKBP1A,PRKCH,PPM1F,CREB1,NPTN,NAGK,CCNL2,NF1,NEK3,NPR1,RPS6KA5,PKD2,LMNA,RB1,HMGXB3,LTBP4,MAPK8IP3,MARK3,SENP2,TPP1,STK38L,SH3BP5,RGS3,GRB10,PLK2,FLCN,NRP1,MAST2,PTEN,FYN,SRPK1,IQGAP1,FBXW7,HERPUD1,IKBKB,PXN,FECH,PRKRIP1,STK19,MAPK8,MYLK,USP15,TRIM28,MAP4K4,CSK,PTPRC,CDK6,AAK1,PHKG2,PAK1,NCK2,TRPM7,SEMA4D,CSF1R,ERC1,DGKZ,C3,SMAD4,DTYMK,CLK3,NDUFV1,MAPK12,NDUFS2,AK5,ENG,NOX4,NRBP2,STK36,PDIA5,MDFI,ITGA5,RGS2,PDGFRB,CDK11A,CARD14,TNFRSF14,MKNK2,YIF1A,CLK4,TLN1,ADRBK2,GSK3A,SIK3,TWF1,PRPF4B,IGF2,PSTK,PDCD4,CRIPAK,CSNK1E,CDK5RAP1,NTRK1,SPRED1,TNFRSF10B,PHKG1,SMAD9,DUSP6,TGFBR3,UCK1,UQCRH,PKD1,PDPK1,STK24,CDK5RAP3,GAK,RBKS,PANK3,FASTK,WNK1 | 1.285432327 | 4.43E-04 |
| GO:0048667 | cell morphogenesis involved in neuron differentiation | biological_process | FZD6,IGF1R,LAMB1,RAF1,COL9A1,BDNF,COL2A1,ARHGEF12,CD72,ITGA9,SIPA1L1,MINK1,PDLIM5,ACTR3,LHX4,VASP,CSNK2A1,SLC11A2,CNP,FGFR1,CAPRIN1,SSH2,CREB1,RGMB,RPS6KA5,RB1,MAPK8IP3,PAFAH1B1,USP33,HEXA,NRP1,PTEN,FYN,SRGAP2,MEF2A,TCTN1,CACNB1,MYCBP2,RAB8A,COL9A3,PTPRC,FLOT1,RANBP9,PAK1,NCK2,RAB10,SEMA6A,SEMA4D,ROBO3,EZR,GLI3,EXT1,TBCE,UNC5B,PTPRD,ITGA5,FARP1,KIF13B,TLN1,ROBO2,CACNB3,NTRK1,STK24,SSH1,CLASP1 | 1.517714232 | 4.66E-04 |
| GO:0050852 | T cell receptor signaling pathway | biological_process | BTN3A1,HLA-DPB1,PTPN22,HLA-DQA1,PTPN6,VASP,RC3H1,TAB2,LCP2,PTEN,FYN,PHPT1,IKBKB,CSK,PTPRC,PAK1,CACNB3,PDPK1 | 2.377523381 | 4.72E-04 |
| GO:0000377 | RNA splicing, via transesterification reactions with bulged adenosine as nucleophile | biological_process | SFSWAP,CDK13,SART1,CLNS1A,SNRNP70,DDX23,DDX39A,SUGP1,DHX9,EFTUD2,PRPF3,CELF1,SF3A2,HNRNPA3,PRMT5,SRPK1,CSTF1,DDX41,SRRM2,SKIV2L2,PRPF8,HNRNPL,HNRNPH3,SRSF10,NCBP2,TGS1,SNRPE,PRPF4B,PABPC1,PABPN1 | 1.906504598 | 4.73E-04 |
| GO:0000398 | mRNA splicing, via spliceosome | biological_process | SFSWAP,CDK13,SART1,CLNS1A,SNRNP70,DDX23,DDX39A,SUGP1,DHX9,EFTUD2,PRPF3,CELF1,SF3A2,HNRNPA3,PRMT5,SRPK1,CSTF1,DDX41,SRRM2,SKIV2L2,PRPF8,HNRNPL,HNRNPH3,SRSF10,NCBP2,TGS1,SNRPE,PRPF4B,PABPC1,PABPN1 | 1.906504598 | 4.73E-04 |
| GO:0006470 | protein dephosphorylation | biological_process | PTPN22,PTPN6,IGBP1,PPP5C,SYMPK,PPM1F,SSH2,RPRD1A,PTPRK,MDP1,MTMR14,PTEN,PHPT1,PTP4A2,PTPRF,SMEK1,PTPRS,PTPRC,TIMM50,CDC14B,PTPRD,PTPN4,PTPN23,DUSP6,SSH1,EYA2 | 2.013151982 | 4.77E-04 |
| GO:0048523 | negative regulation of cellular process | biological_process | FZD6,CRBN,KANK2,ACADVL,EIF2B4,PSMB10,CLMN,IGF1R,LAMB1,NPHP3,TNRC6A,SIRT2,NOC2L,RAF1,LEPRE1,PPP1R13B,GAS8,SFSWAP,BDNF,SIN3B,CBX5,SART1,COL2A1,SUPT5H,MARCH5,UBXN1,DPP4,BCL6,TBX2,PTPN22,CNTF,CUX1,EED,FMR1,SMAD7,USP4,HDAC6,GLG1,ARHGEF12,EHMT1,ZNF496,HGS,LANCL2,SYTL4,LEF1,PAX8,SUPT4H1,PSMB9,ADAMTS1,NISCH,UHMK1,USP47,ADAM8,NOL3,CAPZB,DNAJC10,CD9,PCGF6,KRIT1,PTPN6,LHX4,CSNK2A1,IGBP1,PRKACA,ANAPC4,PLK1,ASNS,HDGF,RC3H1,NPC1,ZC3H12A,CLN8,TBX18,DR1,BCLAF1,JAM2,GIGYF2,TBC1D14,WAC,STK4,TRO,ZNF540,FGFR1,HSF4,CAPRIN1,CELF1,PAF1,TCHP,RNF8,MDM2,RHBDD1,FKBP1A,PRKCH,PPM1F,YY1,PFDN5,CREB1,SRP9,PTPRK,SNX13,DFNA5,RHBDF1,NF1,ZEB1,IFITM3,COL18A1,MED28,NPR1,RPS6KA5,G3BP1,NIPBL,PKD2,CASP2,MITF,RB1,PRMT5,ZFPM2,TXNDC5,RNF168,PAFAH1B1,SLFN11,CHMP1A,ANXA5,SH3BP5,ZNF263,BICD1,RGS3,NR1H3,GRB10,PLK2,FLCN,NRP1,CUL4A,CHFR,TENC1,IGFBP6,FAP,VPS72,PTEN,FYN,SRPK1,RUNX2,IQGAP1,FBXW7,PHPT1,LGMN,RQCD1,SRGAP2,NCOR1,MEF2A,PRKRIP1,SETD8,PIAS2,VILL,MAPK8,USP15,TRIM28,CSK,CDK5RAP2,PTPRC,PSMC6,TBCD,UBP1,CDK6,WDR61,ZNF148,PSMC4,SGSM3,STAG2,GOPC,PAK1,NCK2,LEPROT,RHEB,CTSH,TCF4,ACD,SEMA4D,DGKZ,SRSF10,SMAD4,C1QTNF3,TGFB1I1,CREBZF,ING4,CD276,CDC14B,LRPAP1,ATP5A1,GLI3,MAPK12,EPS15L1,EPN1,ENG,SIRT7,NOX4,GAPDH,ERCC1,PHF1,BICC1,NRBP2,WWP1,ARHGEF7,PHF12,MED6,UNC5B,MDFI,CIRBP,ITGA5,RGS2,HINFP,STAM2,LPCAT1,MLX,GLIS3,TNFRSF14,DBF4,RUNX1,SMARCA4,RHBDF2,PER3,CD164,ADRBK2,GSK3A,ANKRD6,NCOR2,TWF1,PPAP2A,PTGIS,PHF21A,PDCD4,SNX14,CRIPAK,PSMA1,STAT6,ROBO2,CSNK1E,SON,PMP22,CLIC4,CDK5RAP1,BNIP2,NTRK1,SPRED1,DUSP6,TGFBR3,ZBTB16,BAZ2A,RRP8,LMCD1,PKD1,PDPK1,TSG101,FOXC1,DDAH2,STK24,PABPC1,UBR5,WNK1,CLASP1,CC2D1A,PLA2G16,GATA2,BCL2L2 | 1.198374319 | 4.83E-04 |
| GO:0005815 | microtubule organizing center | cellular_component | GAS8,SYTL4,STARD9,CEP135,MARK4,RANBP1,PRKACA,DHX9,PLK1,SDCCAG8,TTC19,HERC2,CCDC14,PDE4D,DPF2,TCHP,KIAA0586,ZFYVE26,DIS3L,FLII,PKD2,PPP2R3C,GNAI1,PAFAH1B1,CHMP1A,PLK2,CEP112,SMEK1,TCTN1,ABCA2,RAB8A,CSK,CDK5RAP2,DDHD2,FLOT1,WDR35,EVC,SMAD4,EZR,AK5,PHF1,HAUS5,DZIP1,CC2D2A,YIF1A,PTPN23,TLN1,TTLL11,DYNC1I2,PSMA1,CLIC4,BNIP2,C2CD3,CLASP1,CC2D1A | 1.573891672 | 5.40E-04 |
| GO:0015031 | protein transport | biological_process | RAB3GAP2,CADM1,BTN3A1,NLRP1,CCDC91,RAB34,BCL6,NUP98,HDAC6,ATP6V1D,HGS,DERL2,SYTL4,RBPMS,COG4,PAM,AP3S2,UHMK1,ADAM8,RAB35,KPNA6,PRKACA,VPS52,LMAN2,NUTF2,DNM1L,HERC2,NUP210,RAB24,ATG4B,VAMP7,BBS1,VTI1A,HPS4,RAB18,DISP1,TIMM23,SEC31A,MDM2,SNAP23,SFT2D2,MCFD2,SRP9,DDX58,RPL27,LCP2,SNX13,AP4B1,RHBDF1,SNX21,NF1,RPL9,RAB31,PKD2,LMNA,STX16,PAFAH1B1,SENP2,SYTL2,CHMP1A,GCC2,NR1H3,RPL24,RPL37A,STX2,SNX17,KPNB1,PPP1R10,NECAB3,CACNB1,CLTCL1,RAB8A,DENND4C,CSK,STX18,NUP37,CLTB,GOPC,RAB10,VPS45,ACD,CSF1R,ATP6V0A1,ERC1,TIMM50,OS9,TMED3,SMAD4,GRPEL2,C1QTNF3,RPL4,FLNA,RAB5A,GLI3,TMED2,MCOLN1,SCFD1,VTI1B,SLC25A6,VAMP4,MDFI,NUP85,STAM2,VPS51,CANX,YIF1A,RPLP0,SDAD1,SNX27,KIF13B,RHBDF2,ATG4A,PDIA3,ATG16L2,SNX14,LONP2,ATG3,LMF1,SEC31B,SPCS3,PKD1,TSG101,KPNA1,SCAMP1,UBR5,GORASP1 | 1.322080759 | 6.01E-04 |
| GO:0016567 | protein ubiquitination | biological_process | CRBN,PSMB10,PPIL2,SPOP,MARCH5,UBXN1,FBXO32,ZFP91,SMAD7,USP4,HDAC6,PSMB9,APITD1,RNF220,MARCH6,ANAPC4,PLK1,RC3H1,HERC2,SEPT4,MIB2,PCGF1,DCAF11,WAC,PAF1,SHARPIN,RNF8,MDM2,FKBP1A,ANAPC16,NUB1,SPSB3,UNKL,DCAF8,UBE2Q1,UBAC1,RNF168,RNF217,CUL4A,CHFR,PTEN,FBXW7,HERPUD1,MYCBP2,RNF213,TRIM28,PSMC6,RNF146,PSMC4,OS9,ASB8,CDCA3,CDC14B,DCAF6,WWP1,UBA6,TRIM41,DCAF17,KLHL7,FBXW2,AMFR,PSMA1,SHPRH,ATG3,ZBTB16,UBR5 | 1.494443268 | 6.41E-04 |
| GO:0032507 | maintenance of protein location in cell | biological_process | GPAA1,TLN2,PKD2,RB1,SYNE1,BICD1,GCC2,GOPC,OS9,EZR,FLNA,SUN2,MDFI,TLN1,PDIA3,PKD1,CLASP1 | 2.385778671 | 6.44E-04 |
| GO:0009892 | negative regulation of metabolic process | biological_process | KANK2,ACADVL,EIF2B4,PSMB10,IGF1R,TNRC6A,SIRT2,NOC2L,SFSWAP,SIN3B,CBX5,SUPT5H,UBXN1,BCL6,TBX2,CUX1,EED,FMR1,SMAD7,USP4,HDAC6,GLG1,EHMT1,ZNF496,LANCL2,LEF1,SUPT4H1,PSMB9,USP47,DNAJC10,PCGF6,PTPN6,IGBP1,ANAPC4,PLK1,HDGF,NPC1,ZC3H12A,CLN8,TBX18,DR1,BCLAF1,GIGYF2,TBC1D14,WAC,ZNF540,FGFR1,HSF4,CAPRIN1,CELF1,PAF1,RNF8,MDM2,PPM1F,YY1,PFDN5,CREB1,SRP9,PTPRK,NF1,ZEB1,IFITM3,RPS6KA5,NIPBL,RB1,PRMT5,ZFPM2,RNF168,CHMP1A,SH3BP5,ZNF263,RGS3,NR1H3,GRB10,FLCN,VPS72,PTEN,FYN,RUNX2,IQGAP1,FBXW7,NCOR1,MEF2A,PRKRIP1,SETD8,UPK3B,TRIM28,PTPRC,PSMC6,UBP1,ZNF148,PSMC4,STAG2,TCF4,ACD,SEMA4D,PIWIL4,SRSF10,SMAD4,C1QTNF3,CREBZF,ING4,CD276,FLNA,GLI3,ENG,SIRT7,GAPDH,ERCC1,PHF1,NRBP2,WWP1,PHF12,MDFI,CIRBP,RGS2,HINFP,NCBP2,LPCAT1,MLX,GLIS3,SMARCA4,PER3,GSK3A,NCOR2,PTGIS,PHF21A,PDCD4,CRIPAK,PSMA1,STAT6,CDK5RAP1,SPRED1,DUSP6,ZBTB16,BAZ2A,RRP8,LMCD1,PDPK1,TSG101,PABPC1,UBR5,WNK1,CC2D1A,GATA2 | 1.290311566 | 6.61E-04 |
| GO:0034620 | cellular response to unfolded protein | biological_process | ACADVL,VAPB,DERL2,XBP1,ASNS,HDGF,SEC31A,RHBDD1,LMNA,TPP1,HERPUD1,PDIA5,YIF1A,TLN1,GSK3A,AMFR | 2.449569544 | 6.82E-04 |
| GO:0000375 | RNA splicing, via transesterification reactions | biological_process | SFSWAP,CDK13,SART1,CLNS1A,SNRNP70,DDX23,DDX39A,SUGP1,DHX9,EFTUD2,PRPF3,CELF1,SF3A2,HNRNPA3,PRMT5,SRPK1,CSTF1,DDX41,SRRM2,SKIV2L2,PRPF8,HNRNPL,HNRNPH3,SRSF10,NCBP2,TGS1,SNRPE,PRPF4B,PABPC1,PABPN1 | 1.862575921 | 7.01E-04 |
| GO:0006987 | activation of signaling protein activity involved in unfolded protein response | biological_process | ACADVL,VAPB,XBP1,ASNS,HDGF,SEC31A,LMNA,TPP1,HERPUD1,PDIA5,YIF1A,TLN1,GSK3A | 2.736628475 | 7.23E-04 |
| GO:0034976 | response to endoplasmic reticulum stress | biological_process | ACADVL,VAPB,DERL2,BCL2L11,XBP1,DNAJC10,ASNS,HDGF,SEC31A,LMNA,TPP1,HERPUD1,OS9,PDIA5,YIF1A,TLN1,GSK3A,AMFR,TNFRSF10B | 2.225913195 | 7.77E-04 |
| GO:0016070 | RNA metabolic process | biological_process | FZD6,RNASEH2B,PBX2,KANK2,GTF3C2,RAI1,PSMB10,XRN1,SIRT2,MYNN,NOC2L,TARS,ZNF131,RSC1A1,SFSWAP,CDK13,RBM6,SIN3B,CBX5,SART1,SUPT5H,SUPT20H,PWP1,BCL6,FUBP1,ZNF783,TBX2,MMS19,CUX1,RBM17,CLNS1A,EED,SMAD7,MCF2L,HDAC6,EHMT1,RNH1,ZNF496,TYW1B,NARS,LANCL2,LEF1,PAX8,SUPT4H1,ZNF83,PSMB9,EMX2,RBPMS,ZSCAN31,XBP1,PAM,NOM1,SNRNP70,DDX23,METTL3,APITD1,USP47,ADAM8,NOL3,POLR3E,GABPB1,PRPF40A,PCGF6,DDX39A,SUGP1,EEF1A1,LHX4,CSNK2A1,IGBP1,UPF3A,NOD1,STAT2,RPP14,DHX9,PLK1,ZNF446,PTGES2,UPF1,ZNF621,HDGF,RC3H1,PPP5C,CCNL1,CHD6,ZC3H12A,SYMPK,EFTUD2,FAM58A,CNP,TBX18,LBX2,PCGF1,DR1,BCLAF1,ZNF721,ZNF397,JHDM1D,ZNF710,PRPF3,WAC,ZNF142,FUBP3,RARS,ZNF540,FGFR1,HSF4,PAIP1,GTF3C1,CELF1,RNASET2,SF3A2,PAF1,TAB2,SGK1,DPF2,MDM2,PRKCH,PPM1F,ZNF595,TBP,DIS3L,YY1,INO80,GMEB2,PFDN5,CREB1,FLII,RPRD1A,DDX58,RPL27,CCNL2,PTPRK,ZEB1,EIF4B,IFITM3,ASCC2,RGMB,EBF1,RPL9,MED28,ZNF3,RPS6KA5,NIPBL,BRD9,ZNF837,PKD2,HNRNPA3,RXRB,LMNA,MITF,NOL8,RB1,PRMT5,MZF1,ZFPM2,TP53BP1,ZNF865,SENP2,SUB1,CHMP1A,PDE8A,NSA2,DDX6,ZNF558,ZNF263,ZNF180,BICD1,ZNF276,NR1H3,GARS,PAN2,USP7,PLD6,FLCN,ZNF605,ZNF410,RPL24,RPL37A,SAP30BP,VPS72,PTEN,SRPK1,RNASEK,RUNX2,CSTF1,FBXW7,INTS4,SMARCD3,IKBKB,RQCD1,RFX7,NCOR1,PPP1R10,MEF2A,PARN,SETD8,PIAS2,MAPK8,MYCBP2,USP15,DDX41,SRRM2,PBX3,ZNF565,ABCA2,AFF4,TRIM28,DMTF1,CDK5RAP2,PSMC6,UBP1,SKIV2L2,WDR61,EBF4,PRPF8,FARSA,ZNF148,ZNF76,PSMC4,HNRNPL,SP110,PPA2,NCK2,HNRNPH3,TCF4,IKZF5,HMGN2,WDR4,SEMA4D,SSBP2,ERC1,NFYC,PIWIL4,RPUSD4,SRSF10,SS18,RCOR3,SMAD4,CHURC1,CHURC1-FNTB,ZNF114,MIER2,TGFB1I1,INO80E,RPL4,ZNF44,CREBZF,ING4,RBMS1,ZNF687,CLK3,NR2C2,FHOD1,FIP1L1,DNTTIP2,FLNA,IRF9,GLI3,MAPK12,CCDC59,DCAF6,THOC2,ENG,SIRT7,ZSCAN5A,TCF12,ARNT,ZNF692,PHF1,STK36,WWP1,PHF12,MED6,MDFI,ZNF554,HINFP,NCBP2,MLX,TGS1,CDK11A,GLIS3,ELP6,BDP1,RUNX1,SMARCA4,NAA16,LRPPRC,RPLP0,RAD54L2,CLASRP,ZNF518B,CRCP,CLK4,ZNF90,ZNF638,PER3,SNRPE,ZNF383,POLR2J3,NCOR2,SETD2,PRPF4B,IGF2,PTGIS,FTSJ3,TROVE2,ATXN3,PSTK,PHF21A,PDCD4,SOX13,CHD2,PSMA1,STAT6,CARS2,SON,ZNF138,ZNF705A,CDK5RAP1,NTRK1,TFAM,BRWD1,SMAD9,TGFBR3,ZFC3H1,ZBTB16,BAZ2A,RRP8,VARS,LARS,PHF19,LMCD1,LUC7L3,PKD1,PDPK1,TSG101,USF1,FOXC1,ARL6IP4,CDK5RAP3,MTO1,PABPC1,FASTK,EYA2,SMARCAD1,CC2D1A,GATA2,PABPN1 | 1.153944403 | 7.90E-04 |
| GO:0048522 | positive regulation of cellular process | biological_process | OBFC1,PBX2,CRIP2,ACADVL,CADM1,PSMB10,IGF1R,LAMB1,UTRN,RAF1,NLRP1,PPP1R13B,CDK13,BDNF,SART1,SUPT5H,HLA-DPB1,MARCH5,DPP4,BCL6,TBX2,MMS19,SHMT2,ZFP91,CNTF,VAPB,SMAD7,MCF2L,HDAC6,ZNF496,CASP4,DERL2,IL15RA,LANCL2,SYTL4,ARPC4-TTLL3,LEF1,PAX8,SUPT4H1,PSMB9,BCL2L13,BCL2L11,RBPMS,XBP1,HSD17B12,HLA-DQA1,RAD23A,APITD1,MARK4,UHMK1,USP47,ADAM8,GABPB1,RANBP1,MINK1,PTPN6,ACTR3,CSNK2A1,IGBP1,UPF3A,NOD1,PRKACA,ANAPC4,PLK1,ASNS,DNM1L,PTGES2,HDGF,PPP5C,SHISA5,ZC3H12A,SEPT4,MIB2,SYMPK,AAMP,ATG4B,TBX18,BCLAF1,JHDM1D,TNK2,WAC,STK4,FUBP3,FGFR1,HSF4,DISP1,PAIP1,CAPRIN1,ADCY4,PAF1,TAB2,SHARPIN,DPF2,RNF8,SEC31A,MDM2,FKBP1A,PRKCH,PPM1F,TBP,INO80,CREB1,NPTN,TNFRSF25,PLEKHG5,DDX58,DFNA5,NF1,ZEB1,NUB1,IFITM3,RGMB,COL18A1,EBF1,NPR1,RPS6KA5,NIPBL,CAPN10,PKD2,CASP2,RXRB,LMNA,MITF,NOL8,RB1,MAPK8IP3,PLEKHA2,ZFPM2,TP53BP1,BLOC1S5,RNF168,PAFAH1B1,SENP2,IL18,MTCH1,TPP1,AACS,ARPC2,BICD1,NR1H3,GRB10,PLK2,FLCN,NRP1,CUL4A,SAP30BP,PTEN,FYN,ALDH1A3,SRPK1,RUNX2,IQGAP1,FBXW7,PHPT1,SMARCD3,HERPUD1,IKBKB,PXN,LTBR,NCOR1,MEF2A,OXCT1,LIFR,SMEK1,WASH4P,PIAS2,MAPK8,SH3BP2,MYLK,DDX41,N6AMT1,TRIM28,CSK,CDK5RAP2,PTPRC,PSMC6,RNF146,CDK6,ABI3BP,RARRES2,WDR61,ZNF148,PSMC4,AAK1,PHKG2,PAK1,EVC,NCK2,RHEB,SEMA6A,CTSH,TCF4,SEMA4D,CSF1R,ACTR2,C3,NFYC,SS18,SMAD4,CHURC1,CHURC1-FNTB,C1QTNF3,TGFB1I1,DDAH1,GOLPH3,ING4,CD276,CDC14B,NR2C2,FHOD1,APOL3,FLNA,RAB5A,SUN2,GLI3,MAPK12,DCAF6,ENG,SIRT7,TCF12,ARNT,NOX4,PHF1,TEX261,STK36,ARHGEF7,PDIA5,MED6,MDFI,CIRBP,CIZ1,PTPRD,ITGA5,HINFP,NCBP2,MLX,PDGFRB,COL8A1,LGALS8,GLIS3,ELP6,CARD14,DIABLO,TNFRSF14,RUNX1,SMARCA4,NAA16,YIF1A,TLN1,GSK3A,ANKRD6,NLGN2,PDIA3,IGF2,PTGIS,PSMA1,STAT6,ACIN1,ROBO2,CSNK1E,NSMCE4A,BNIP2,NTRK1,TFAM,SPRED1,TNFRSF10B,SMAD9,HBB,DUSP6,TGFBR3,ZBTB16,RRP8,PHF19,LMCD1,PKD1,PDPK1,USF1,FOXC1,DDAH2,STK24,CDK5RAP3,PABPC1,UBR5,SMARCAD1,CC2D1A,TENM4,GATA2 | 1.177061043 | 8.24E-04 |
| GO:0003682 | chromatin binding | molecular_function | PBX2,NOC2L,SIN3B,CBX5,BCL6,SHMT2,CUX1,EED,LEF1,APITD1,UPF1,CHD6,WAC,PAF1,RNF8,ZEB1,NIPBL,MITF,PRMT5,RNF168,SENP2,MUM1,RUNX2,NCOR1,MEF2A,SSBP1,DMTF1,HMGN2,RCOR3,SMAD4,MIER2,GLI3,SIRT7,HINFP,BDP1,SMARCA4,POLG,NCOR2,PHF21A,TFAM,FOXC1,GATA2 | 1.653889328 | 8.71E-04 |
| GO:0010608 | posttranscriptional regulation of gene expression | biological_process | EIF2B4,TNRC6A,TRNAU1AP,FMR1,SMAD7,USP4,UHMK1,UPF3A,DHX9,PLK1,UPF1,RC3H1,GIGYF2,ZNF540,HPS4,PAIP1,CAPRIN1,CELF1,RNF8,MDM2,CREB1,SRP9,EIF4B,SERBP1,USP3,RNF168,PUM2,PTEN,FBXW7,FECH,AAK1,NCK2,CTSH,ZSWIM7,PIWIL4,FLNA,GAPDH,CIRBP,RGS2,NCBP2,MKNK2,PSTK,VARS,LARS,PABPC1 | 1.621038669 | 8.90E-04 |
| GO:0048518 | positive regulation of biological process | biological_process | OBFC1,PBX2,CRIP2,ACADVL,CADM1,PSMB10,IGF1R,LAMB1,EPHX2,UTRN,BTN3A1,RAF1,NLRP1,PPP1R13B,CDK13,BDNF,SART1,SUPT5H,HLA-DPB1,MARCH5,DPP4,BCL6,FUBP1,TBX2,PTPN22,MMS19,SHMT2,ZFP91,CNTF,VAPB,SMAD7,MCF2L,HDAC6,ZNF496,CASP4,DERL2,IL15RA,LANCL2,SYTL4,ARPC4-TTLL3,LEF1,PAX8,SUPT4H1,PSMB9,BCL2L13,BCL2L11,RBPMS,XBP1,HSD17B12,HLA-DQA1,RAD23A,APITD1,MARK4,UHMK1,USP47,ADAM8,GABPB1,RANBP1,MINK1,PTPN6,ACTR3,VASP,CSNK2A1,IGBP1,UPF3A,NOD1,PRKACA,ANAPC4,PLK1,ASNS,DNM1L,PTGES2,HDGF,RC3H1,PPP5C,SHISA5,ZC3H12A,SEPT4,MIB2,SYMPK,AAMP,ATG4B,TBX18,BCLAF1,CAMK2D,JHDM1D,TNK2,WAC,STK4,FUBP3,FGFR1,HPS4,HSF4,C2,CFB,DISP1,PAIP1,CAPRIN1,ADCY4,CELF1,PAF1,TAB2,SGK1,SHARPIN,DPF2,RNF8,SEC31A,MDM2,RHBDD1,FKBP1A,PRKCH,PPM1F,TBP,INO80,CREB1,NPTN,TNFRSF25,PLEKHG5,DDX58,LCP2,DFNA5,NF1,ZEB1,NUB1,IFITM3,RGMB,COL18A1,EBF1,NPR1,RPS6KA5,NIPBL,CAPN10,PKD2,CASP2,RXRB,LMNA,MITF,NOL8,RB1,MAPK8IP3,PLEKHA2,ZFPM2,TP53BP1,BLOC1S5,RNF168,PAFAH1B1,SENP2,IL18,MTCH1,TPP1,AACS,ARPC2,BICD1,NR1H3,GRB10,PLK2,FLCN,NRP1,CUL4A,SAP30BP,PTEN,FYN,ALDH1A3,SRPK1,RUNX2,IQGAP1,C1R,FBXW7,PHPT1,SMARCD3,HERPUD1,IKBKB,PXN,LTBR,NCOR1,MEF2A,OXCT1,LIFR,SMEK1,WASH4P,PIAS2,MAPK8,SH3BP2,CLTCL1,MYLK,DDX41,N6AMT1,TRIM28,CSK,CDK5RAP2,PTPRC,PSMC6,RNF146,CDK6,ABI3BP,RARRES2,WDR61,ZNF148,PSMC4,SGSM3,AAK1,PHKG2,PAK1,EVC,NCK2,RHEB,SEMA6A,CTSH,TCF4,SEMA4D,CSF1R,ACTR2,C3,NFYC,SS18,SMAD4,CHURC1,CHURC1-FNTB,C1QTNF3,TGFB1I1,DDAH1,GOLPH3,ING4,CD276,CDC14B,NR2C2,FHOD1,APOL3,FLNA,RAB5A,SUN2,C1S,GLI3,TMED2,MAPK12,DCAF6,ENG,SIRT7,TCF12,ARNT,NOX4,PHF1,TEX261,SLC25A6,STK36,ARHGEF7,PDIA5,MED6,MDFI,CIRBP,CIZ1,PTPRD,ITGA5,RGS2,HINFP,NCBP2,LPCAT1,MLX,PDGFRB,COL8A1,LGALS8,GLIS3,ELP6,CARD14,DIABLO,TNFRSF14,RUNX1,SMARCA4,NAA16,YIF1A,TLN1,FGF14,GSK3A,ANKRD6,NLGN2,PDIA3,IGF2,PTGIS,PSMA1,STAT6,ACIN1,ROBO2,CSNK1E,CACNB3,NSMCE4A,BNIP2,NTRK1,TFAM,SPRED1,TNFRSF10B,SMAD9,HBB,DUSP6,TGFBR3,ZBTB16,RRP8,PHF19,LMCD1,PKD1,PDPK1,USF1,FOXC1,KPNA1,DDAH2,STK24,CDK5RAP3,PABPC1,UBR5,SMARCAD1,CC2D1A,TENM4,GATA2 | 1.165039173 | 8.97E-04 |
| GO:0034655 | nucleobase-containing compound catabolic process | biological_process | RNASEH2B,CRBN,RAB3GAP2,DHX34,EIF2B4,XRN1,MYO1D,RALGAPA2,SEPT5,ATP2B1,RAB34,BCL6,GBP3,MCF2L,ARHGEF12,ATP6V1D,RNH1,PNKP,ARHGEF25,RGL4,STARD13,ABCC1,DDX23,DNAJC10,RAB35,RANBP1,SIPA1L1,DDX39A,KRIT1,SKIV2L,MINK1,RHOF,EEF1A1,UPF3A,DHX9,PDE7B,TBC1D2B,DNM1L,UPF1,RC3H1,HERC2,CHD6,TBC1D10B,SEPT4,EFTUD2,CNP,TBC1D14,TNK2,GIT2,MTG1,RAB18,PAIP1,PMS1,PDE4D,RNASET2,PLEKHG4,DIS3L,FAM13A,INO80,RALGPS2,PLEKHG5,DDX58,RPL27,SNX13,NF1,EIF4B,RTKN,RPL9,G3BP1,RAB31,GALT,GNAI1,PAFAH1B1,PDE8A,DDX6,ACAP2,RGS3,CYTH2,PAN2,RPL24,ARHGAP9,RPL37A,IQGAP1,RQCD1,KPNB1,SRGAP2,ATP11B,PARN,DDX41,RNF213,ABCA2,DENND4C,MAP4K4,ITPA,PSMC6,TBCD,SKIV2L2,PSMC4,ARHGAP29,SGSM3,GOPC,RHEB,SEMA4D,GNB3,GRPEL2,TBC1D22A,RPL4,RAB5A,ATP5A1,TMED2,RASGRF2,ERCC1,ATP8B2,ARHGEF7,ASAP1,RGS2,NCBP2,RAD51B,FARP1,RAP1B,SMARCA4,RPLP0,DHX40,DOCK8,LONRF3,GSK3A,MYO1E,RGL2,CHD2,LONP2,ACIN1,PSD3,BNIP2,NTRK1,DHX37,KPNA1,RAPGEF6,PABPC1,SMARCAD1,DENND6B | 1.287487064 | 8.99E-04 |
| GO:0050662 | coenzyme binding | molecular_function | ACADVL,SIRT2,TYW1B,H6PD,PNPO,FDXR,GCDH,IDH3G,ALDH6A1,ACBD4,FMO2,GMDS,ALDH1A3,IDH1,MTRR,NDUFV1,NDUFS2,SIRT7,NOX4,ETFA,GAPDH,SDHA,IDH3B,D2HGDH,SIRT3,MTO1 | 1.92953755 | 9.14E-04 |
| GO:0010494 | cytoplasmic stress granule | cellular_component | FMR1,RC3H1,CAPRIN1,G3BP1,PUM2,DDX6,CIRBP,PABPC1 | 3.731554073 | 9.40E-04 |
| GO:0006893 | Golgi to plasma membrane transport | biological_process | VAMP7,BBS1,RAB31,GCC2,CSK,GOPC,RAB10,VAMP4 | 3.716588274 | 9.43E-04 |
| GO:0017111 | nucleoside-triphosphatase activity | molecular_function | CRBN,RAB3GAP2,DHX34,EIF2B4,MYO1D,RALGAPA2,SEPT5,ATP2B1,RAB34,ERCC6L2,BCL6,GBP3,MCF2L,ARHGEF12,ATP6V1D,DYNC1I1,ARHGEF25,RGL4,STARD13,STARD9,ABCC1,DDX23,DNAJC10,RAB35,RANBP1,SIPA1L1,DDX39A,KRIT1,SKIV2L,MINK1,RHOF,EEF1A1,DHX9,TBC1D2B,DNM1L,UPF1,HERC2,CHD6,TBC1D10B,SEPT4,EFTUD2,TBC1D14,TNK2,GIT2,MTG1,RAB18,PMS1,PLEKHG4,FAM13A,INO80,RALGPS2,PLEKHG5,DDX58,SNX13,NF1,RTKN,G3BP1,RAB31,NTPCR,GNAI1,PAFAH1B1,DNALI1,DDX6,ACAP2,RGS3,CYTH2,ARHGAP9,IQGAP1,SRGAP2,ATP11B,SSBP1,DDX41,RNF213,ABCA2,DENND4C,MAP4K4,PSMC6,TBCD,SKIV2L2,PSMC4,KIFC2,ARHGAP29,SGSM3,GOPC,RHEB,SEMA4D,GNB3,GRPEL2,TBC1D22A,KLC1,NAV1,DNHD1,RAB5A,BCS1L,ATP5A1,TMED2,RASGRF2,ATP8B2,ARHGEF7,ASAP1,NUBP1,RGS2,RAD51B,MYO7B,FARP1,RAP1B,SMARCA4,DHX40,RAD54L2,KIF13B,DOCK8,LONRF3,MYO1E,DYNC1I2,RGL2,CHD2,LONP2,ACIN1,PSD3,BNIP2,NTRK1,SHPRH,DHX37,RAPGEF6,SMARCAD1,DENND6B | 1.305101318 | 9.70E-04 |
| GO:0032075 | positive regulation of nuclease activity | biological_process | ACADVL,VAPB,XBP1,ASNS,HDGF,SEC31A,LMNA,TPP1,HERPUD1,PDIA5,YIF1A,TLN1,GSK3A | 2.65370034 | 9.80E-04 |
| GO:0034644 | cellular response to UV | biological_process | NOC2L,USP47,MDM2,RHBDD1,YY1,INO80,PTPRK,CRIP1,FBXW7 | 3.368158123 | 9.99E-04 |
| GO:0018904 | ether metabolic process | biological_process | DNAJC10,TXNL1,QSOX1,TXNDC5,P4HB,PDIA5,PDIA3 | 4.100366411 | 1.04E-03 |
| GO:0045184 | establishment of protein localization | biological_process | RAB3GAP2,CADM1,BTN3A1,NLRP1,CCDC91,RAB34,BCL6,NUP98,HDAC6,ATP6V1D,HGS,DERL2,SYTL4,RBPMS,COG4,PAM,AP3S2,UHMK1,ADAM8,RAB35,KPNA6,PRKACA,VPS52,LMAN2,NUTF2,DNM1L,HERC2,NUP210,RAB24,ATG4B,VAMP7,BBS1,VTI1A,HPS4,RAB18,DISP1,TIMM23,SEC31A,MDM2,SNAP23,SFT2D2,MCFD2,SRP9,DDX58,RPL27,LCP2,SNX13,AP4B1,RHBDF1,SNX21,NF1,RPL9,RAB31,PKD2,LMNA,STX16,PAFAH1B1,SENP2,SYTL2,CHMP1A,GCC2,NR1H3,RPL24,RPL37A,STX2,SNX17,KPNB1,PPP1R10,NECAB3,CACNB1,CLTCL1,RAB8A,DENND4C,CSK,STX18,NUP37,CLTB,GOPC,RAB10,VPS45,ACD,CSF1R,ATP6V0A1,ERC1,TIMM50,OS9,TMED3,SMAD4,GRPEL2,C1QTNF3,RPL4,FLNA,RAB5A,GLI3,TMED2,MCOLN1,SCFD1,VTI1B,SLC25A6,VAMP4,MDFI,NUP85,HINFP,STAM2,VPS51,CANX,YIF1A,RPLP0,SDAD1,SNX27,KIF13B,RHBDF2,ATG4A,PDIA3,ATG16L2,SNX14,LONP2,ATG3,LMF1,SEC31B,SPCS3,PKD1,PDPK1,TSG101,KPNA1,SCAMP1,UBR5,GORASP1 | 1.298566987 | 1.09E-03 |
| GO:0031982 | vesicle | cellular_component | CADM1,LAMB1,SEPT5,BDNF,CPE,RAB34,HLA-DPB1,DPP4,DYNC1I1,HGS,IL15RA,SYTL4,HLA-C,YIPF1,ADAMTS1,RGL4,PAM,HLA-DQA1,AP3S2,ADAM8,RAB35,CD9,NPC1,SLC11A2,CNP,VAMP7,CAMK2D,TNK2,FLG,VTI1A,FGFR1,HPS4,SEC31A,MDM2,SNAP23,COL12A1,MCFD2,SNX21,LGALS3BP,RAB31,GNAI1,BLOC1S5,PAFAH1B1,TPP1,SYTL2,EPN2,ANXA5,ADAM15,BICD1,GARS,NRP1,STX2,SNX17,GGNBP2,SRGAP2,ITGB5,CLTCL1,HLA-F,ABCA2,RAB8A,DENND4C,CLTB,FLOT1,AAK1,GOPC,NCK2,RAB10,CTSH,ATP6V0A1,C3,P4HB,TMED3,CLK3,LRPAP1,FLNA,RAB5A,TMED2,VEZT,SCFD1,GAPDH,PDGFRB,VPS51,CANX,PTPN23,CRCP,TLN1,PDIA3,MYO1E,CORO7,DPP7,DYNC1I2,CLIC4,NTRK1,CTTNBP2,SEC31B,ZDHHC8,PDPK1,CD63 | 1.356425442 | 1.12E-03 |
| GO:0045749 | negative regulation of S phase of mitotic cell cycle | biological_process | BCL6,PAF1,RB1,CHMP1A,SMARCA4 | 5.613596872 | 1.14E-03 |
| GO:0016818 | hydrolase activity, acting on acid anhydrides, in phosphorus-containing anhydrides | molecular_function | CRBN,RAB3GAP2,DHX34,EIF2B4,MYO1D,RALGAPA2,SEPT5,ATP2B1,RAB34,ERCC6L2,BCL6,GBP3,MCF2L,ARHGEF12,ATP6V1D,DYNC1I1,ARHGEF25,RGL4,STARD13,STARD9,ABCC1,DDX23,DNAJC10,RAB35,RANBP1,SIPA1L1,DDX39A,KRIT1,SKIV2L,MINK1,RHOF,EEF1A1,DHX9,TBC1D2B,DNM1L,UPF1,HERC2,CHD6,TBC1D10B,SEPT4,EFTUD2,TBC1D14,TNK2,GIT2,MTG1,RAB18,PMS1,PLEKHG4,FAM13A,INO80,RALGPS2,PLEKHG5,DDX58,SNX13,NF1,RTKN,G3BP1,RAB31,NTPCR,GNAI1,PAFAH1B1,DNALI1,DDX6,ACAP2,RGS3,CYTH2,ARHGAP9,IQGAP1,SRGAP2,ATP11B,SSBP1,DDX41,RNF213,ABCA2,DENND4C,MAP4K4,ITPA,PSMC6,TBCD,SKIV2L2,PSMC4,KIFC2,ARHGAP29,SGSM3,GOPC,PPA2,RHEB,SEMA4D,GNB3,GRPEL2,TBC1D22A,KLC1,NAV1,DNHD1,RAB5A,BCS1L,ATP5A1,TMED2,RASGRF2,ATP8B2,ARHGEF7,ASAP1,NUBP1,RGS2,RAD51B,MYO7B,FARP1,RAP1B,SMARCA4,DHX40,RAD54L2,ACYP2,KIF13B,DOCK8,LONRF3,MYO1E,DYNC1I2,RGL2,CHD2,LONP2,ACIN1,PSD3,BNIP2,NTRK1,SHPRH,DHX37,RAPGEF6,SMARCAD1,DENND6B | 1.294481729 | 1.15E-03 |
| GO:0006417 | regulation of translation | biological_process | EIF2B4,TNRC6A,TRNAU1AP,FMR1,UHMK1,UPF3A,UPF1,GIGYF2,ZNF540,PAIP1,CAPRIN1,CELF1,RNF8,SRP9,EIF4B,RNF168,PUM2,FECH,NCK2,PIWIL4,GAPDH,CIRBP,RGS2,NCBP2,MKNK2,PSTK,VARS,LARS,PABPC1 | 1.825730572 | 1.17E-03 |
| GO:0015035 | protein disulfide oxidoreductase activity | molecular_function | DNAJC10,TXNL1,PTGES2,QSOX1,TXNDC5,P4HB,PDIA5,PDIA3 | 3.601803427 | 1.18E-03 |
| GO:0051248 | negative regulation of protein metabolic process | biological_process | EIF2B4,PSMB10,IGF1R,TNRC6A,NOC2L,UBXN1,FMR1,SMAD7,USP4,HDAC6,GLG1,PSMB9,DNAJC10,PTPN6,IGBP1,ANAPC4,PLK1,CLN8,GIGYF2,WAC,ZNF540,CAPRIN1,CELF1,RNF8,MDM2,PPM1F,SRP9,NF1,RB1,RNF168,SH3BP5,RGS3,NR1H3,PTEN,FYN,PRKRIP1,PTPRC,PSMC6,PSMC4,SEMA4D,SMAD4,CD276,FLNA,ENG,GAPDH,PHF1,CIRBP,RGS2,PDCD4,CRIPAK,PSMA1,CDK5RAP1,SPRED1,DUSP6,PDPK1,UBR5,WNK1 | 1.505764808 | 1.23E-03 |
| GO:0045185 | maintenance of protein location | biological_process | GPAA1,TLN2,PKD2,RB1,SYNE1,BICD1,GCC2,GOPC,OS9,EZR,FLNA,SUN2,MDFI,TLN1,TWF1,PDIA3,PKD1,CLASP1 | 2.184751215 | 1.32E-03 |
| GO:0022618 | ribonucleoprotein complex assembly | biological_process | SFSWAP,SART1,CLNS1A,DDX23,RC3H1,CELF1,SF3A2,PIH1D1,PRMT5,PUM2,DDX6,BICD1,ERAL1,SRSF10,CIRBP,NCBP2,TGS1,SNRPE | 2.184751215 | 1.32E-03 |
| GO:0016817 | hydrolase activity, acting on acid anhydrides | molecular_function | CRBN,RAB3GAP2,DHX34,EIF2B4,MYO1D,RALGAPA2,SEPT5,ATP2B1,RAB34,ERCC6L2,BCL6,GBP3,MCF2L,ARHGEF12,ATP6V1D,DYNC1I1,ARHGEF25,RGL4,STARD13,STARD9,ABCC1,DDX23,DNAJC10,RAB35,RANBP1,SIPA1L1,DDX39A,KRIT1,SKIV2L,MINK1,RHOF,EEF1A1,DHX9,TBC1D2B,DNM1L,UPF1,HERC2,CHD6,TBC1D10B,SEPT4,EFTUD2,TBC1D14,TNK2,GIT2,MTG1,RAB18,PMS1,PLEKHG4,FAM13A,INO80,RALGPS2,PLEKHG5,DDX58,SNX13,NF1,RTKN,G3BP1,RAB31,NTPCR,GNAI1,PAFAH1B1,DNALI1,DDX6,ACAP2,RGS3,CYTH2,ARHGAP9,IQGAP1,SRGAP2,ATP11B,SSBP1,DDX41,RNF213,ABCA2,DENND4C,MAP4K4,ITPA,PSMC6,TBCD,SKIV2L2,PSMC4,KIFC2,ARHGAP29,SGSM3,GOPC,PPA2,RHEB,SEMA4D,GNB3,GRPEL2,TBC1D22A,KLC1,NAV1,DNHD1,RAB5A,BCS1L,ATP5A1,TMED2,RASGRF2,ATP8B2,ARHGEF7,ASAP1,NUBP1,RGS2,RAD51B,MYO7B,FARP1,RAP1B,SMARCA4,DHX40,RAD54L2,ACYP2,KIF13B,DOCK8,LONRF3,MYO1E,DYNC1I2,RGL2,CHD2,LONP2,ACIN1,PSD3,BNIP2,NTRK1,SHPRH,DHX37,RAPGEF6,SMARCAD1,DENND6B | 1.289690901 | 1.33E-03 |
| GO:0035770 | ribonucleoprotein granule | cellular_component | XRN1,TNRC6A,FMR1,UHMK1,UPF1,RC3H1,CAPRIN1,G3BP1,PUM2,DDX6,PAN2,RQCD1,PIWIL4,CIRBP,PABPC1 | 2.385226325 | 1.34E-03 |
| GO:0034613 | cellular protein localization | biological_process | RAB3GAP2,RALGAPA2,GAS8,CPE,MARCH5,BCL6,GPAA1,NUP98,SMAD7,USP4,HDAC6,HGS,DERL2,SYTL4,RBPMS,AP3S2,UHMK1,KPNA6,PRKACA,PLK1,NUTF2,HERC2,VAMP7,BBS1,VTI1A,HPS4,TIMM23,MDM2,TLN2,SRP9,DDX58,RPL27,PTPRK,SNX13,AP4B1,NF1,RPL9,NIPBL,RAB31,PKD2,LMNA,RB1,STX16,SYTL2,SYNE1,BICD1,GCC2,FLCN,RPL24,RPL37A,STX2,SNX17,KPNB1,PPP1R10,CACNB1,CLTCL1,DENND4C,CSK,STX18,CLTB,FLOT1,GOPC,PAK1,LEPROT,RAB10,VPS45,ACD,TIMM50,OS9,SMAD4,GRPEL2,C1QTNF3,EZR,RPL4,FLNA,SUN2,GLI3,TMED2,VTI1B,SLC25A6,VAMP4,MDFI,STAM2,RPLP0,KIF13B,TLN1,NLGN2,PDIA3,LONP2,CSNK1E,ATG3,SPCS3,PKD1,PDPK1,KPNA1,CD63,UBR5,CLASP1 | 1.347263249 | 1.35E-03 |
| GO:0031327 | negative regulation of cellular biosynthetic process | biological_process | KANK2,ACADVL,EIF2B4,TNRC6A,SIRT2,NOC2L,SIN3B,CBX5,SUPT5H,BCL6,TBX2,CUX1,EED,FMR1,SMAD7,HDAC6,EHMT1,ZNF496,LANCL2,LEF1,SUPT4H1,USP47,PCGF6,IGBP1,PLK1,HDGF,ZC3H12A,TBX18,DR1,BCLAF1,GIGYF2,ZNF540,FGFR1,HSF4,CAPRIN1,CELF1,PAF1,RNF8,MDM2,PPM1F,YY1,PFDN5,CREB1,SRP9,PTPRK,ZEB1,IFITM3,RPS6KA5,NIPBL,RB1,PRMT5,ZFPM2,RNF168,CHMP1A,ZNF263,NR1H3,GRB10,FLCN,VPS72,RUNX2,FBXW7,NCOR1,MEF2A,SETD8,TRIM28,UBP1,ZNF148,STAG2,TCF4,ACD,SEMA4D,SMAD4,C1QTNF3,CREBZF,ING4,CD276,GLI3,ENG,SIRT7,GAPDH,WWP1,PHF12,MDFI,CIRBP,HINFP,LPCAT1,MLX,GLIS3,SMARCA4,PER3,GSK3A,NCOR2,PTGIS,PHF21A,PDCD4,STAT6,ZBTB16,BAZ2A,RRP8,LMCD1,TSG101,CC2D1A,GATA2 | 1.335593019 | 1.37E-03 |
| GO:2000113 | negative regulation of cellular macromolecule biosynthetic process | biological_process | KANK2,EIF2B4,TNRC6A,SIRT2,NOC2L,SIN3B,CBX5,SUPT5H,BCL6,TBX2,CUX1,EED,FMR1,SMAD7,HDAC6,EHMT1,ZNF496,LANCL2,LEF1,SUPT4H1,USP47,PCGF6,IGBP1,PLK1,HDGF,TBX18,DR1,BCLAF1,GIGYF2,ZNF540,FGFR1,HSF4,CAPRIN1,CELF1,PAF1,RNF8,MDM2,PPM1F,YY1,PFDN5,CREB1,SRP9,PTPRK,ZEB1,RPS6KA5,NIPBL,RB1,PRMT5,ZFPM2,RNF168,CHMP1A,ZNF263,NR1H3,GRB10,FLCN,VPS72,RUNX2,FBXW7,NCOR1,MEF2A,SETD8,TRIM28,UBP1,ZNF148,STAG2,TCF4,ACD,SEMA4D,SMAD4,CREBZF,ING4,GLI3,ENG,SIRT7,GAPDH,WWP1,PHF12,MDFI,CIRBP,HINFP,MLX,GLIS3,SMARCA4,PER3,GSK3A,NCOR2,PHF21A,PDCD4,STAT6,ZBTB16,BAZ2A,RRP8,LMCD1,TSG101,CC2D1A,GATA2 | 1.351486645 | 1.37E-03 |
| GO:0019198 | transmembrane receptor protein phosphatase activity | molecular_function | PTPN6,PTPRK,PTPRF,PTPRS,PTPRC,PTPRD | 4.502254283 | 1.39E-03 |
| GO:0005001 | transmembrane receptor protein tyrosine phosphatase activity | molecular_function | PTPN6,PTPRK,PTPRF,PTPRS,PTPRC,PTPRD | 4.502254283 | 1.39E-03 |
| GO:0032269 | negative regulation of cellular protein metabolic process | biological_process | EIF2B4,PSMB10,IGF1R,TNRC6A,NOC2L,UBXN1,FMR1,SMAD7,USP4,HDAC6,PSMB9,DNAJC10,PTPN6,IGBP1,ANAPC4,PLK1,CLN8,GIGYF2,WAC,ZNF540,CAPRIN1,CELF1,RNF8,PPM1F,SRP9,NF1,RB1,RNF168,SH3BP5,RGS3,NR1H3,PTEN,PRKRIP1,PTPRC,PSMC6,PSMC4,SEMA4D,ENG,GAPDH,PHF1,CIRBP,RGS2,PDCD4,CRIPAK,PSMA1,CDK5RAP1,SPRED1,DUSP6,PDPK1,UBR5,WNK1 | 1.537145989 | 1.39E-03 |
| GO:0048646 | anatomical structure formation involved in morphogenesis | biological_process | FZD6,CADM1,IGF1R,LAMB1,NPHP3,RAF1,COL9A1,BDNF,CPE,PLCD1,COL2A1,TBX2,CNTF,SMAD7,GLG1,ARHGEF12,RNH1,CD72,TTLL3,LEF1,PAX8,ITGA9,ADAMTS1,BCL2L11,ADAM8,CD9,SIPA1L1,KRIT1,MINK1,PDLIM5,ACTR3,LHX4,VASP,CSNK2A1,PRKACA,SDCCAG8,ZC3H12A,SLC11A2,AAMP,CNP,TBX18,BBS1,STK4,FGFR1,CAPRIN1,PAF1,KIAA0586,FKBP1A,SSH2,THBS3,CREB1,NF1,ZEB1,CRIP1,RGMB,COL18A1,NPR1,RPS6KA5,NIPBL,PKD2,SLC12A6,MAPK8IP3,ZFPM2,PAFAH1B1,IL18,ADAM15,USP33,NRP1,PTEN,FYN,ALDH1A3,RUNX2,FBXW7,SMARCD3,IFT172,PXN,SRGAP2,MEF2A,TCTN1,CACNB1,MYCBP2,MYLK,RAB8A,TRIM28,COL9A3,PTPRC,UBP1,FLOT1,RANBP9,WDR35,PAK1,EVC,NCK2,RAB10,SEMA6A,CTSH,SEMA4D,CSF1R,C3,ROBO3,SMAD4,DDAH1,LMBR1,EZR,FLNA,GLI3,TMED2,ENG,EXT1,ERCC1,GAA,STK36,TBCE,ASAP1,UNC5B,PTPRD,ITGA5,PDGFRB,COL8A1,DZIP1,CC2D2A,FARP1,RUNX1,SMARCA4,KIF13B,PTPN23,TLN1,GSK3A,ANKRD6,SETD2,COL13A1,PTGIS,TROVE2,MYO1E,TANC1,ROBO2,CACNB3,PMP22,CLIC4,NTRK1,SMAD9,DUSP6,TGFBR3,TMEM237,SEPT2,PKD1,FOXC1,STK24,SSH1,C2CD3,EYA2,CLASP1,TENM4,GATA2 | 1.256684073 | 1.39E-03 |
| GO:0050851 | antigen receptor-mediated signaling pathway | biological_process | BTN3A1,HLA-DPB1,PTPN22,HLA-DQA1,PTPN6,VASP,RC3H1,TAB2,PRKCH,LCP2,PTEN,FYN,PHPT1,IKBKB,MEF2A,CSK,PTPRC,PAK1,CACNB3,PDPK1 | 2.072712691 | 1.43E-03 |
| GO:0030176 | integral to endoplasmic reticulum membrane | cellular_component | HLA-DPB1,GPAA1,DERL2,HLA-C,HLA-DQA1,MARCH6,PIGS,RHBDD1,EMC3,PKD2,HLA-F,TMEM66,EMC4,ELOVL1,EXT1,CANX,AMFR | 2.223238992 | 1.49E-03 |
| GO:0005793 | endoplasmic reticulum-Golgi intermediate compartment | cellular_component | LMAN2,CLN8,MCFD2,SERPINH1,RGMB,DDHD2,P4HB,TMED3,TMED2,TRAPPC12,YIF1A,NUCB1 | 2.665395766 | 1.49E-03 |
| GO:0033261 | regulation of S phase | biological_process | BCL6,PAF1,INO80,RB1,CHMP1A,CUL4A,PTPRC,SMARCA4 | 3.476808385 | 1.52E-03 |
| GO:0016462 | pyrophosphatase activity | molecular_function | CRBN,RAB3GAP2,DHX34,EIF2B4,MYO1D,RALGAPA2,SEPT5,ATP2B1,RAB34,ERCC6L2,BCL6,GBP3,MCF2L,ARHGEF12,ATP6V1D,DYNC1I1,ARHGEF25,RGL4,STARD13,STARD9,ABCC1,DDX23,DNAJC10,RAB35,RANBP1,SIPA1L1,DDX39A,KRIT1,SKIV2L,MINK1,RHOF,EEF1A1,DHX9,TBC1D2B,DNM1L,UPF1,HERC2,CHD6,TBC1D10B,SEPT4,EFTUD2,TBC1D14,TNK2,GIT2,MTG1,RAB18,PMS1,PLEKHG4,FAM13A,INO80,RALGPS2,PLEKHG5,DDX58,SNX13,NF1,RTKN,G3BP1,RAB31,NTPCR,GNAI1,PAFAH1B1,DNALI1,DDX6,ACAP2,RGS3,CYTH2,ARHGAP9,IQGAP1,SRGAP2,ATP11B,SSBP1,DDX41,RNF213,ABCA2,DENND4C,MAP4K4,ITPA,PSMC6,TBCD,SKIV2L2,PSMC4,KIFC2,ARHGAP29,SGSM3,GOPC,PPA2,RHEB,SEMA4D,GNB3,GRPEL2,TBC1D22A,KLC1,NAV1,DNHD1,RAB5A,BCS1L,ATP5A1,TMED2,RASGRF2,ATP8B2,ARHGEF7,ASAP1,NUBP1,RGS2,RAD51B,MYO7B,FARP1,RAP1B,SMARCA4,DHX40,RAD54L2,KIF13B,DOCK8,LONRF3,MYO1E,DYNC1I2,RGL2,CHD2,LONP2,ACIN1,PSD3,BNIP2,NTRK1,SHPRH,DHX37,RAPGEF6,SMARCAD1,DENND6B | 1.286358367 | 1.53E-03 |
| GO:0070727 | cellular macromolecule localization | biological_process | RAB3GAP2,RALGAPA2,GAS8,CPE,MARCH5,BCL6,GPAA1,NUP98,SMAD7,USP4,HDAC6,HGS,DERL2,SYTL4,RBPMS,AP3S2,UHMK1,KPNA6,PRKACA,PLK1,NUTF2,HERC2,VAMP7,BBS1,VTI1A,HPS4,TIMM23,MDM2,TLN2,SRP9,DDX58,RPL27,PTPRK,SNX13,AP4B1,NF1,RPL9,NIPBL,RAB31,PKD2,LMNA,RB1,STX16,SYTL2,SYNE1,BICD1,GCC2,FLCN,RPL24,RPL37A,STX2,SNX17,KPNB1,PPP1R10,CACNB1,CLTCL1,DENND4C,CSK,STX18,CLTB,FLOT1,GOPC,PAK1,LEPROT,RAB10,VPS45,ACD,TIMM50,OS9,SMAD4,GRPEL2,C1QTNF3,EZR,RPL4,FLNA,SUN2,GLI3,TMED2,VTI1B,SLC25A6,VAMP4,MDFI,STAM2,RPLP0,KIF13B,TLN1,NLGN2,PDIA3,LONP2,CSNK1E,ATG3,SPCS3,PKD1,PDPK1,KPNA1,CD63,UBR5,CLASP1 | 1.341786569 | 1.54E-03 |
| GO:0009189 | deoxyribonucleoside diphosphate biosynthetic process | biological_process | CMPK2,DTYMK,AK5 | 10.10447437 | 1.54E-03 |
| GO:0045900 | negative regulation of translational elongation | biological_process | RNF8,SRP9,RNF168 | 10.10447437 | 1.54E-03 |
| GO:0006397 | mRNA processing | biological_process | SFSWAP,CDK13,SART1,SUPT5H,RBM17,CLNS1A,SNRNP70,DDX23,NOL3,PRPF40A,DDX39A,SUGP1,DHX9,SYMPK,EFTUD2,PRPF3,PAIP1,CELF1,SF3A2,PAF1,EIF4B,HNRNPA3,PRMT5,PAN2,SRPK1,CSTF1,RQCD1,PARN,DDX41,SRRM2,SKIV2L2,PRPF8,HNRNPL,HNRNPH3,SRSF10,FIP1L1,THOC2,NCBP2,TGS1,CDK11A,CLASRP,SNRPE,PRPF4B,SON,LUC7L3,PABPC1,PABPN1 | 1.559639722 | 1.56E-03 |
| GO:0006508 | proteolysis | biological_process | USP10,CRBN,PSMB10,SIRT2,DDI2,SPOP,CPE,UBXN1,DPP4,NLN,SMAD7,USP4,HDAC6,CASP4,DERL2,PSMB9,ADAMTS1,CPM,RAD23A,SCRN3,USP47,ADAM8,DNAJC10,PRKACA,ANAPC4,PLK1,PREPL,HERC2,ATG4B,CLN8,DNPEP,USP20,WAC,C2,CFB,MMP16,RNF8,MDM2,RHBDD1,RHBDF1,SERPINH1,NUB1,CAPN10,CASP2,USP24,LTBP4,USP3,RNF168,SENP2,RNF217,TPP1,ADAM15,USP33,NR1H3,PAN2,USP7,CUL4A,CHFR,FAP,PTEN,C1R,FBXW7,LGMN,HERPUD1,ADAMTS18,USP15,PSMC6,RNF146,AGBL5,PSMC4,CTSH,OS9,TGFB1I1,USP54,C1S,PCSK7,WWP1,UBA6,MAN1B1,USP40,RHBDF2,LONRF3,FBXW2,ATG4A,ATXN3,DPP7,AMFR,LONP2,PSMA1,CSNK1E,STAMBPL1,SPCS3,SENP6,TSG101,ACAN,C2CD3,MMP25,UBR5 | 1.34042435 | 1.59E-03 |
| GO:0007010 | cytoskeleton organization | biological_process | RAF1,BCL6,HDAC6,TTLL3,ARPC4-TTLL3,STARD9,NISCH,PAM,CEP135,MARK4,CAPZB,PRPF40A,RANBP1,SIPA1L1,MINK1,RHOF,ACTR3,VASP,PLK1,CNP,CLN8,PPM1F,TLN2,INO80,SSH2,LIMCH1,NF1,NUMA1,CAPN10,PKD2,LMNA,RB1,NEXN,PAFAH1B1,ARPC2,SYNE1,BICD1,NTMT1,GCC2,CYTH2,PLK2,DAAM1,PTEN,PHPT1,PXN,SRGAP2,NCOR1,MEF2A,WASH4P,VILL,MYCBP2,CDK5RAP2,TBCD,RANBP9,PAK1,NCK2,SEMA6A,TRPM7,CSF1R,ACTR2,SS18,NAV1,EZR,FHOD1,FLNA,SUN2,NOX4,GAPDH,TBCE,HAUS5,PDGFRB,SDAD1,TLN1,TWF1,ATXN3,CORO7,CRIPAK,SON,CLIC4,BNIP2,BRWD1,SENP6,PDPK1,SSH1,CLASP1 | 1.373110026 | 1.62E-03 |
| GO:0051287 | NAD binding | molecular_function | SIRT2,IDH3G,ALDH1A3,IDH1,NDUFV1,NDUFS2,SIRT7,GAPDH,IDH3B,SIRT3 | 2.936252793 | 1.66E-03 |
| GO:0048812 | neuron projection morphogenesis | biological_process | FZD6,IGF1R,LAMB1,RAF1,COL9A1,BDNF,COL2A1,ARHGEF12,CD72,ITGA9,SIPA1L1,MINK1,PDLIM5,ACTR3,LHX4,VASP,CSNK2A1,SLC11A2,CNP,FGFR1,CAPRIN1,SSH2,CREB1,RGMB,RPS6KA5,MAPK8IP3,PAFAH1B1,USP33,NRP1,PTEN,FYN,SRGAP2,MEF2A,TCTN1,CACNB1,MYCBP2,RAB8A,COL9A3,PTPRC,FLOT1,RANBP9,PAK1,NCK2,RAB10,SEMA6A,SEMA4D,ROBO3,EZR,GLI3,EXT1,TBCE,UNC5B,PTPRD,ITGA5,FARP1,KIF13B,TLN1,ROBO2,CACNB3,NTRK1,STK24,SSH1,CLASP1 | 1.4533833 | 1.69E-03 |
| GO:0042578 | phosphoric ester hydrolase activity | molecular_function | MYO1D,EPHX2,PLCD1,PTPN22,PLD1,SMPD4,PNKP,PTPN6,CSNK2A1,IGBP1,PRKACA,PDE7B,PPP5C,CNP,PLCB4,FGFR1,ADCY4,PDE4D,FKBP1A,MTMR11,PPM1F,SSH2,CREB1,ZCCHC9,PTPRK,NTPCR,NEDD8-MDP1,MDP1,GPCPD1,SYTL2,PDE8A,BICD1,PLD6,TENC1,MTMR14,PTEN,PHPT1,PTP4A2,PTPRF,PPP1R10,MEF2A,PTPRS,PTPRC,MTMR9,SEMA4D,TIMM50,CDC14B,PTPRD,PDGFRB,PTPN4,FARP1,PTPN23,PPAP2A,PDIA3,NTRK1,SPRED1,DUSP6,SSH1,EYA2,WNK1 | 1.468126397 | 1.69E-03 |
| GO:0031519 | PcG protein complex | cellular_component | EED,PCGF6,CSNK2A1,PCGF1,YY1,PHF1,PHC3,PHF19,PHC2 | 3.148498749 | 1.71E-03 |
| GO:0044430 | cytoskeletal part | cellular_component | MYO1D,SIRT2,SEPT5,GAS8,MMS19,HDAC6,DYNC1I1,LANCL2,SYTL4,TTLL3,ARPC4-TTLL3,BCL2L11,STARD9,CEP135,MARK4,ADAM8,MAP7D1,CAPZB,RANBP1,SIPA1L1,MINK1,PDLIM5,ACTR3,PRKACA,DHX9,PLK1,SDCCAG8,TTC19,DNM1L,HERC2,SEPT4,CNP,PLCB4,FLG,CCDC14,PDE4D,SHARPIN,DPF2,TCHP,KIAA0586,ZFYVE26,DIS3L,INO80,FLII,NUMA1,TPM4,MED28,PKD2,LMNA,PPP2R3C,RB1,GNAI1,PAFAH1B1,DNALI1,CHMP1A,ARPC2,BICD1,PLK2,NRP1,DAAM1,FYN,IQGAP1,CEP112,PXN,SRGAP2,NCOR1,SMEK1,TCTN1,CLTCL1,MYLK,ABCA2,RAB8A,CSK,CDK5RAP2,TBCD,DDHD2,FLOT1,KIFC2,GOPC,RANBP9,WDR35,PAK1,EVC,ACTR2,SS18,SMAD4,FNTB,KLC1,NAV1,EZR,DNHD1,FHOD1,ACTR10,AK5,PHF1,TBCE,NUP85,HAUS5,CLIP2,DZIP1,CC2D2A,MYO7B,LMNB1,LRPPRC,YIF1A,KIF13B,PTPN23,TLN1,TTLL11,NARF,MYO1E,DYNC1I2,PSMA1,TANC1,PSD3,CLIC4,BNIP2,SEPT2,C2CD3,CLASP1,CC2D1A | 1.294489802 | 1.73E-03 |
| GO:0030968 | endoplasmic reticulum unfolded protein response | biological_process | ACADVL,VAPB,DERL2,XBP1,ASNS,HDGF,SEC31A,LMNA,TPP1,HERPUD1,PDIA5,YIF1A,TLN1,GSK3A,AMFR | 2.322867671 | 1.73E-03 |
| GO:0032403 | protein complex binding | molecular_function | IGF1R,LAMB1,UTRN,SMAD7,HDAC6,NISCH,CD9,PLK1,COL16A1,WAC,PMS1,PAF1,SHARPIN,FKBP1A,TLN2,NIPBL,STRN4,LTBP4,GNAI1,PAFAH1B1,ARPC2,GRB10,FLCN,PTEN,FYN,IQGAP1,PXN,ITGB5,CDK5RAP2,AAK1,CTSH,ENG,ITGA5,TLN1,NCOR2,IGF2,CDK5RAP1,TGFBR3,UQCRH,PDPK1 | 1.617576389 | 1.73E-03 |
| GO:0009987 | cellular process | biological_process | FZD6,MARVELD1,CDK14,USP10,RNASEH2B,SLC25A37,CRBN,OBFC1,RAB3GAP2,PBX2,LPP,DHX34,KANK2,CRIP2,ACADVL,EIF2B4,GTF3C2,CADM1,RAI1,PSMB10,XRN1,CKB,CLMN,IGF1R,AVL9,LAMB1,GK5,NPHP3,PTS,TNRC6A,MYO1D,SLC22A23,SIRT2,EPHX2,UTRN,RALGAPA2,MYNN,TRNAU1AP,BTN3A1,NOC2L,PPIL2,TARS,RAF1,NLRP1,ZNF131,SEPT5,GP1BB,F11R,LEPRE1,SLC16A3,PPP1R13B,GAS8,COL9A1,RSC1A1,SFSWAP,CDK13,RBM6,BDNF,TAZ,SIN3B,ATP2B1,SPOP,CPE,CBX5,PLCD1,SART1,COL2A1,RAB34,SUPT5H,SUPT20H,RILPL1,HLA-DPB1,ST3GAL1,MARCH5,UBXN1,DPP4,PWP1,FBXO32,BCL6,FUBP1,ZNF783,CMPK2,TBX2,ENOSF1,PTPN22,MMS19,GBP3,SPATA20,SHMT2,ZFP91,CNTF,EEF2K,PLD1,VAPB,GPAA1,CUX1,PGS1,RBM17,CLNS1A,NUP98,EED,SLC9B2,AMT,FMR1,SMPD4,SMAD7,MCF2L,USP4,BMP8A,PPFIBP2,HDAC6,GLG1,ARHGEF12,EHMT1,ATP6V1D,VRK2,DYNC1I1,RNH1,ZNF496,HGS,TYW1B,CASP4,DERL2,IL15RA,NARS,LANCL2,H6PD,CD72,SYTL4,DGKA,TTLL3,ARPC4-TTLL3,PRMT10,PNKP,LEF1,GLS,PAX8,HLA-C,SUPT4H1,ZNF83,PSMB9,EMX2,ITGA9,ARHGEF25,ADAMTS1,RGL4,BCL2L13,BCL2L11,RBPMS,XYLT1,STARD13,ZSCAN31,STARD9,XBP1,COG4,FDPS,NISCH,PAM,ABCC1,NOM1,CEP135,SNRNP70,HSD17B12,DDX23,HLA-DQA1,RAD23A,AP3S2,METTL3,APITD1,MPDU1,MARK4,UHMK1,USP47,ADAM8,NOL3,POLR3E,CAPZB,GABPB1,PRPF40A,DNAJC10,RNF220,RAB35,XAF1,CD9,PCGF6,RANBP1,SIPA1L1,MARCH6,DDX39A,KRIT1,KPNA6,SKIV2L,MINK1,PDLIM5,RHOF,PTPN6,SUGP1,EEF1A1,ACTR3,LHX4,VASP,CSNK2A1,IGBP1,UPF3A,NOD1,PRKACA,STAT2,ANAPC4,RPP14,DHX9,PIGS,PLK1,APLNR,SDCCAG8,ZNF446,PNPO,PDE7B,ASNS,TBC1D2B,COL16A1,NUTF2,JAG2,TTC19,DNM1L,TXNL1,PTGES2,UPF1,ZNF621,HDGF,FDXR,RC3H1,PPP5C,PIGG,PDXK,NPC1,SHISA5,CCNL1,RHOBTB1,HERC2,CHD6,ZC3H12A,NUP210,TBC1D10B,SEPT4,MIB2,POLM,SLC11A2,SYMPK,EFTUD2,AAMP,FAM58A,RAB24,ATG4B,SLC26A6,IL13RA1,LSAMP,CNP,CLN8,TBX18,PIGN,GCDH,LBX2,PCGF1,VAMP7,DR1,BCLAF1,CAMK2D,FYTTD1,ZNF721,ZNF397,JHDM1D,SLC16A1,ZNF710,PLCB4,BBS1,JAM2,GIGYF2,DNPEP,TBC1D14,GALK2,PRPF3,TNK2,COL14A1,USP20,GIT2,FLG,DCAF11,WAC,STK4,ZNF142,FUBP3,TRO,MTG1,RARS,ZNF540,SLC38A2,ALDH18A1,TPCN2,COPS7B,VTI1A,FGFR1,HPS4,RAB18,HSF4,DISP1,PAIP1,CAPRIN1,GTF3C1,MMP16,ERH,NADSYN1,PMS1,ADCY4,CELF1,SNCAIP,PDE4D,SLC4A2,RNASET2,SF3A2,GSDMD,TIMM23,PAF1,TAB2,SGK1,PLEKHG4,SLC9A5,SHARPIN,DPF2,TCHP,CPT1B,CHKB,NADK,IDI1,RNF8,KIAA0586,CYP2R1,SEC31A,MDM2,RHBDD1,SNAP23,COL12A1,FKBP1A,ZCCHC14,ZFYVE26,PRKCH,MTMR11,DAZAP1,ANAPC16,PPM1F,ZNF595,TBP,DIS3L,IDH3G,YY1,FAM13A,TLN2,INO80,GPAT2,GMEB2,SSH2,THBS3,MCFD2,PFDN5,TTC1,CREB1,NPTN,SRP9,RALGPS2,NAGK,FLII,TNFRSF25,PLEKHG5,QSOX1,RPRD1A,CCNDBP1,DDX58,ALDH6A1,RPL27,ZCCHC9,LCP2,CCNL2,PTPRK,SNX13,DFNA5,AP4B1,RHBDF1,SERPINH1,LIMCH1,MAGI1,SNX21,NF1,ZEB1,ACAA1,NEK3,EIF4B,CRIP1,NUB1,IFITM3,LGALS3BP,ASCC2,ATG12,SPSB3,NUMA1,TPM4,RGMB,COL18A1,RTKN,EBF1,RPL9,MED28,PHF15,FKBP10,UNKL,NPR1,ZNF3,RPS6KA5,G3BP1,NIPBL,RAB31,ALKBH3,ADSL,ALG6,ST3GAL4,BRD9,CAPN10,DCAF8,GCNT2,NTPCR,ZNF837,PKD2,CASP2,SLC12A6,HNRNPA3,RXRB,GALT,UBE2Q1,NEDD8-MDP1,MDP1,UBAC1,LMNA,RSL1D1,MITF,NOL8,ITGA3,USP24,RB1,PRMT5,HMGXB3,LTBP4,MAPK8IP3,RABGGTA,GNAI1,USP3,PLEKHA2,STX16,MZF1,ZFPM2,TP53BP1,BLOC1S5,TXNDC5,NEXN,RNF168,MARK3,PAFAH1B1,ZNF865,MFSD10,SENP2,ISYNA1,EDEM2,GPCPD1,IL18,PUM2,MTCH1,RNF217,ESAM,SLFN11,CALCOCO2,STARD3,TPP1,SYTL2,DNALI1,SUB1,PWP2,CHMP1A,PDE8A,NSA2,AACS,ARPC2,SYNE1,STK38L,EPN2,DDX6,ACAP2,ZNF558,ANXA5,GALNT2,ADAM15,SH3BP5,MUM1,USP33,ZNF263 | 1.025975849 | 1.76E-03 |
| GO:0007507 | heart development | biological_process | NPHP3,RAF1,TAZ,SIN3B,CPE,COL2A1,TBX2,SMAD7,ADAMTS1,PAM,TBX18,STK4,FGFR1,TAB2,FKBP1A,NF1,CRIP1,NIPBL,PKD2,RXRB,LMNA,ZFPM2,SENP2,ADAM15,NRP1,PTEN,SMARCD3,MEF2A,OXCT1,GLI3,TMED2,ENG,NOX4,GAA,PDGFRB,EPOR,SMARCA4,GSK3A,NCOR2,SETD2,DUSP6,TGFBR3,PKD1,FOXC1,C2CD3,TENM4 | 1.557138429 | 1.80E-03 |
| GO:0016570 | histone modification | biological_process | SIRT2,NOC2L,EED,HDAC6,EHMT1,LEF1,PCGF1,DR1,JHDM1D,WAC,HSF4,PAF1,RNF8,PHF15,RPS6KA5,NIPBL,PRMT5,USP3,RNF168,FLCN,NCOR1,SETD8,MAPK8,WDR61,ING4,MSL1,SIRT7,PHF1,SMARCA4,SETD2,KANSL3,ATXN3,BAZ2A,PHF19,UBR5,EYA2,SMARCAD1,GATA2 | 1.635655063 | 1.84E-03 |
| GO:0016740 | transferase activity | molecular_function | CDK14,ACADVL,CKB,IGF1R,GK5,SIRT2,RAF1,CDK13,TAZ,ST3GAL1,CMPK2,SHMT2,ZFP91,EEF2K,VAPB,PGS1,PARP6,EED,AMT,EHMT1,VRK2,DGKA,PRMT10,PNKP,XYLT1,XBP1,FDPS,GLT8D1,METTL3,MARK4,UHMK1,ADAM8,POLR3E,MINK1,PTPN6,CSNK2A1,NOD1,PRKACA,PLK1,ASNS,HDGF,PIGG,PDXK,CCNL1,POLM,FAM58A,CLN8,PIGN,CAMK2D,GALK2,TNK2,STK4,ALDH18A1,FGFR1,ADCY4,TAB2,SGK1,CPT1B,CHKB,NADK,SEC31A,FKBP1A,PRKCH,PPM1F,GPAT2,NAGK,CCNL2,NF1,ACAA1,NEK3,NPR1,RPS6KA5,ALG6,ST3GAL4,GCNT2,NTPCR,PKD2,GALT,LMNA,RB1,PRMT5,HMGXB3,LTBP4,MAPK8IP3,RABGGTA,MARK3,TPP1,STK38L,GALNT2,SH3BP5,NTMT1,RGS3,PLK2,NRP1,UST,MAST2,PTEN,FYN,SRPK1,IQGAP1,FBXW7,PHPT1,HERPUD1,IKBKB,PXN,OXCT1,PRKRIP1,SETD8,STK19,MAPK8,MYLK,N6AMT1,TRIM28,MAP4K4,CSK,PTPRC,CDK6,AAK1,ST6GALNAC5,PHKG2,PAK1,NCK2,ACD,TRPM7,WDR4,CSF1R,DGKZ,ELOVL1,FUT4,FNTB,CHURC1-FNTB,DTYMK,MBOAT2,CLK3,DLST,HGSNAT,MGAT5,MAPK12,AK5,B4GALT4,ENG,NOX4,EXT1,GAPDH,NRBP2,B3GAT3,STK36,PDIA5,NAT9,MDFI,RABGGTB,NAA10,RGS2,LPCAT1,PDGFRB,TGS1,CDK11A,CARD14,MKNK2,NAA16,YIF1A,CRCP,CLK4,TLN1,ADRBK2,GSK3A,SIK3,THUMPD2,POLG,POLR2J3,SETD2,TWF1,PCYT1A,KANSL3,PIGO,PRPF4B,IGF2,FTSJ3,WDFY3,PSTK,GPHN,PDCD4,CRIPAK,CSNK1E,CDK5RAP1,NTRK1,SPRED1,TNFRSF10B,PHKG1,DUSP6,TGFBR3,ZDHHC8,SIRT3,UCK1,RRP8,PKD1,PDPK1,STK24,HEMK1,CDK5RAP3,GAK,ALG9,RBKS,PANK3,FASTK,WNK1 | 1.20241709 | 1.92E-03 |
| GO:0031399 | regulation of protein modification process | biological_process | ACADVL,PSMB10,IGF1R,NOC2L,RAF1,UBXN1,ZFP91,CNTF,EEF2K,VAPB,SMAD7,USP4,PSMB9,RBPMS,XBP1,APITD1,ADAM8,DNAJC10,PTPN6,IGBP1,NOD1,PRKACA,ANAPC4,PLK1,ASNS,HDGF,CCNL1,SEPT4,SYMPK,FAM58A,TNK2,STK4,FGFR1,ADCY4,TAB2,SEC31A,FKBP1A,PPM1F,NPTN,CCNL2,NF1,RPS6KA5,NIPBL,PKD2,LMNA,RB1,MAPK8IP3,SENP2,TPP1,SH3BP5,RGS3,FLCN,NRP1,PTEN,IQGAP1,FBXW7,HERPUD1,PXN,NCOR1,FECH,PRKRIP1,MAPK8,CSK,PTPRC,PSMC6,WDR61,PSMC4,PAK1,NCK2,SEMA4D,CSF1R,C3,SMAD4,CDC14B,AK5,ENG,ARNT,NOX4,PHF1,PDIA5,MDFI,ITGA5,RGS2,PDGFRB,CARD14,TNFRSF14,YIF1A,TLN1,GSK3A,TWF1,IGF2,PDCD4,CRIPAK,PSMA1,CDK5RAP1,NTRK1,SPRED1,TNFRSF10B,DUSP6,PHF19,PKD1,PDPK1,CDK5RAP3,UBR5,WNK1,GATA2 | 1.315008328 | 1.95E-03 |
| GO:0009166 | nucleotide catabolic process | biological_process | CRBN,RAB3GAP2,DHX34,EIF2B4,MYO1D,RALGAPA2,SEPT5,ATP2B1,RAB34,BCL6,GBP3,MCF2L,ARHGEF12,ATP6V1D,ARHGEF25,RGL4,STARD13,ABCC1,DDX23,DNAJC10,RAB35,RANBP1,SIPA1L1,DDX39A,KRIT1,SKIV2L,MINK1,RHOF,EEF1A1,DHX9,PDE7B,TBC1D2B,DNM1L,UPF1,HERC2,CHD6,TBC1D10B,SEPT4,EFTUD2,CNP,TBC1D14,TNK2,GIT2,MTG1,RAB18,PMS1,PDE4D,PLEKHG4,FAM13A,INO80,RALGPS2,PLEKHG5,DDX58,SNX13,NF1,RTKN,G3BP1,RAB31,GALT,GNAI1,PAFAH1B1,PDE8A,DDX6,ACAP2,RGS3,CYTH2,ARHGAP9,IQGAP1,SRGAP2,ATP11B,DDX41,RNF213,ABCA2,DENND4C,MAP4K4,ITPA,PSMC6,TBCD,SKIV2L2,PSMC4,ARHGAP29,SGSM3,GOPC,RHEB,SEMA4D,GNB3,GRPEL2,TBC1D22A,RAB5A,ATP5A1,TMED2,RASGRF2,ATP8B2,ARHGEF7,ASAP1,RGS2,RAD51B,FARP1,RAP1B,SMARCA4,DHX40,DOCK8,LONRF3,GSK3A,MYO1E,RGL2,CHD2,LONP2,ACIN1,PSD3,BNIP2,NTRK1,DHX37,RAPGEF6,DENND6B | 1.297615357 | 2.00E-03 |
| GO:0046777 | protein autophosphorylation | biological_process | IGF1R,EEF2K,VRK2,UHMK1,MINK1,CSNK2A1,PRKACA,CAMK2D,STK4,FGFR1,FYN,TRIM28,CSK,PTPRC,AAK1,PAK1,TRPM7,CSF1R,CLK3,ENG,PDGFRB,CLK4,NTRK1,PDPK1,STK24 | 1.850636332 | 2.05E-03 |
| GO:0045454 | cell redox homeostasis | biological_process | DNAJC10,KRIT1,TXNL1,PTGES2,QSOX1,TXNDC5,TXNDC15,SEPW1,P4HB,PDIA5,PDIA3 | 2.694526499 | 2.07E-03 |
| GO:0030529 | ribonucleoprotein complex | cellular_component | XRN1,TNRC6A,SART1,RBM17,FMR1,SNRNP70,DDX23,UHMK1,SUGP1,DHX9,UPF1,RC3H1,EFTUD2,PRPF3,WAC,CAPRIN1,GTF3C1,CELF1,SF3A2,SRP9,RPL27,PIH1D1,RPL9,RPS6KA5,G3BP1,HNRNPA3,RSL1D1,PUM2,NSA2,DDX6,MRPS7,PAN2,RPL24,RPL37A,IQGAP1,RQCD1,DDX41,SRRM2,SKIV2L2,PRPF8,HNRNPL,RHEB,HNRNPH3,PIWIL4,RPL4,MRPL49,GAPDH,TBCE,CIRBP,TGS1,CANX,RPLP0,DNAJC21,SNRPE,MRPL3,PRPF4B,TROVE2,PSMA1,CSNK1E,PABPC1,PABPN1 | 1.451688766 | 2.08E-03 |
| GO:0009890 | negative regulation of biosynthetic process | biological_process | KANK2,ACADVL,EIF2B4,TNRC6A,SIRT2,NOC2L,SIN3B,CBX5,SUPT5H,BCL6,TBX2,CUX1,EED,FMR1,SMAD7,HDAC6,EHMT1,ZNF496,LANCL2,LEF1,SUPT4H1,USP47,PCGF6,IGBP1,PLK1,HDGF,ZC3H12A,TBX18,DR1,BCLAF1,GIGYF2,ZNF540,FGFR1,HSF4,CAPRIN1,CELF1,PAF1,RNF8,MDM2,PPM1F,YY1,PFDN5,CREB1,SRP9,PTPRK,ZEB1,IFITM3,RPS6KA5,NIPBL,RB1,PRMT5,ZFPM2,RNF168,CHMP1A,ZNF263,NR1H3,GRB10,FLCN,VPS72,RUNX2,FBXW7,NCOR1,MEF2A,SETD8,TRIM28,UBP1,ZNF148,STAG2,TCF4,ACD,SEMA4D,SMAD4,C1QTNF3,CREBZF,ING4,CD276,GLI3,ENG,SIRT7,GAPDH,WWP1,PHF12,MDFI,CIRBP,HINFP,LPCAT1,MLX,GLIS3,SMARCA4,PER3,GSK3A,NCOR2,PTGIS,PHF21A,PDCD4,STAT6,ZBTB16,BAZ2A,RRP8,LMCD1,TSG101,CC2D1A,GATA2 | 1.317835847 | 2.10E-03 |
| GO:0019439 | aromatic compound catabolic process | biological_process | RNASEH2B,CRBN,RAB3GAP2,DHX34,EIF2B4,XRN1,MYO1D,EPHX2,RALGAPA2,SEPT5,ATP2B1,RAB34,BCL6,GBP3,MCF2L,ARHGEF12,ATP6V1D,RNH1,PNKP,ARHGEF25,RGL4,STARD13,ABCC1,DDX23,DNAJC10,RAB35,RANBP1,SIPA1L1,DDX39A,KRIT1,SKIV2L,MINK1,RHOF,EEF1A1,UPF3A,DHX9,PDE7B,TBC1D2B,DNM1L,UPF1,RC3H1,HERC2,CHD6,TBC1D10B,SEPT4,EFTUD2,CNP,TBC1D14,TNK2,GIT2,MTG1,RAB18,PAIP1,PMS1,PDE4D,RNASET2,PLEKHG4,DIS3L,FAM13A,INO80,RALGPS2,PLEKHG5,DDX58,RPL27,SNX13,NF1,EIF4B,RTKN,RPL9,G3BP1,RAB31,GALT,GNAI1,PAFAH1B1,PDE8A,DDX6,ACAP2,RGS3,CYTH2,PAN2,RPL24,ARHGAP9,RPL37A,IQGAP1,RQCD1,KPNB1,SRGAP2,ATP11B,PARN,DDX41,RNF213,ABCA2,DENND4C,MAP4K4,ITPA,PSMC6,TBCD,SKIV2L2,PSMC4,ARHGAP29,SGSM3,GOPC,RHEB,SEMA4D,GNB3,GRPEL2,TBC1D22A,RPL4,RAB5A,ATP5A1,TMED2,RASGRF2,ERCC1,ATP8B2,ARHGEF7,ASAP1,RGS2,NCBP2,RAD51B,FARP1,RAP1B,SMARCA4,RPLP0,DHX40,DOCK8,LONRF3,GSK3A,MYO1E,RGL2,CHD2,LONP2,ACIN1,PSD3,BNIP2,NTRK1,DHX37,KPNA1,RAPGEF6,PABPC1,SMARCAD1,DENND6B | 1.258040518 | 2.14E-03 |
| GO:0042393 | histone binding | molecular_function | NOC2L,CBX5,LEF1,JHDM1D,RNF8,BRD9,USP3,TP53BP1,RNF168,ING4,PHF1,HINFP,NCAPD3,SMARCA4,BAZ2A,RRP8,PHF19 | 2.145934284 | 2.16E-03 |
| GO:0080090 | regulation of primary metabolic process | biological_process | FZD6,OBFC1,RAB3GAP2,PBX2,KANK2,ACADVL,EIF2B4,RAI1,PSMB10,IGF1R,TNRC6A,SIRT2,EPHX2,RALGAPA2,MYNN,TRNAU1AP,NOC2L,RAF1,ZNF131,RSC1A1,SFSWAP,CDK13,SIN3B,CBX5,SUPT5H,SUPT20H,UBXN1,BCL6,FUBP1,ZNF783,TBX2,MMS19,ZFP91,CNTF,EEF2K,VAPB,CUX1,EED,FMR1,SMAD7,MCF2L,USP4,HDAC6,GLG1,ARHGEF12,EHMT1,ZNF496,HGS,LANCL2,LEF1,PAX8,SUPT4H1,ZNF83,PSMB9,EMX2,RBPMS,STARD13,ZSCAN31,XBP1,PAM,SNRNP70,RAD23A,APITD1,UHMK1,USP47,ADAM8,GABPB1,DNAJC10,PCGF6,RANBP1,SIPA1L1,PTPN6,EEF1A1,LHX4,CSNK2A1,IGBP1,UPF3A,NOD1,PRKACA,STAT2,ANAPC4,PLK1,ZNF446,ASNS,TBC1D2B,PTGES2,UPF1,ZNF621,HDGF,CCNL1,CHD6,ZC3H12A,TBC1D10B,SEPT4,SYMPK,FAM58A,CLN8,TBX18,LBX2,PCGF1,DR1,BCLAF1,ZNF721,ZNF397,JHDM1D,ZNF710,GIGYF2,TBC1D14,TNK2,GIT2,WAC,STK4,ZNF142,FUBP3,ZNF540,FGFR1,HSF4,C2,CFB,PAIP1,CAPRIN1,ADCY4,CELF1,PAF1,TAB2,SGK1,DPF2,CPT1B,RNF8,SEC31A,MDM2,RHBDD1,FKBP1A,PRKCH,PPM1F,ZNF595,TBP,YY1,FAM13A,INO80,GMEB2,PFDN5,CREB1,NPTN,SRP9,FLII,RPRD1A,DDX58,CCNL2,PTPRK,SNX13,RHBDF1,SERPINH1,NF1,ZEB1,EIF4B,NUB1,IFITM3,ASCC2,RGMB,EBF1,MED28,NPR1,ZNF3,RPS6KA5,NIPBL,BRD9,ZNF837,PKD2,RXRB,LMNA,MITF,RB1,PRMT5,LTBP4,MAPK8IP3,MZF1,ZFPM2,TP53BP1,RNF168,PAFAH1B1,ZNF865,SENP2,PUM2,TPP1,SUB1,CHMP1A,PDE8A,ACAP2,ZNF558,SH3BP5,ZNF263,ZNF180,BICD1,ZNF276,RGS3,NR1H3,GRB10,USP7,FLCN,NRP1,CUL4A,ZNF605,ZNF410,ARHGAP9,SAP30BP,MAST2,VPS72,PTEN,FYN,SRPK1,RUNX2,IQGAP1,FBXW7,SMARCD3,HERPUD1,IKBKB,RQCD1,PXN,SRGAP2,RFX7,NCOR1,MEF2A,FECH,PRKRIP1,SETD8,SMEK1,NECAB3,PIAS2,MAPK8,MYCBP2,USP15,DDX41,PBX3,ZNF565,ABCA2,AFF4,TRIM28,DMTF1,CSK,CDK5RAP2,PTPRC,OAZ1,PSMC6,TBCD,UBP1,WDR61,EBF4,ZNF148,ZNF76,PSMC4,ARHGAP29,SGSM3,STAG2,SP110,PHKG2,PAK1,NCK2,TCF4,ACD,IKZF5,HMGN2,SEMA4D,SSBP2,CSF1R,ERC1,C3,NFYC,PIWIL4,SRSF10,SS18,RCOR3,SMAD4,CHURC1,CHURC1-FNTB,TBC1D22A,ZNF114,MIER2,C1QTNF3,TGFB1I1,INO80E,ZNF44,CREBZF,ING4,CD276,ZNF687,CDC14B,CLK3,NR2C2,FHOD1,DNTTIP2,FLNA,IRF9,GLI3,TMED2,MAPK12,CCDC59,DCAF6,AK5,ENG,SIRT7,ZSCAN5A,TCF12,ARNT,NOX4,ZNF692,GAPDH,ERCC1,PHF1,STK36,WWP1,ARHGEF7,PHF12,PDIA5,ASAP1,MED6,MDFI,CIRBP,ZNF554,CIZ1,ITGA5,RGS2,HINFP,NCBP2,LPCAT1,MLX,PDGFRB,TGS1,CDK11A,GLIS3,ELP6,CARD14,BDP1,TNFRSF14,RUNX1,MKNK2,SMARCA4,NAA16,LRPPRC,YIF1A,RAD54L2,ZNF518B,CLK4,ZNF90,ZNF638,PER3,TLN1,GSK3A,ZNF383,NCOR2,SETD2,TWF1,PPAP2A,IGF2,PTGIS,ATXN3,PSTK,PHF21A,PDCD4,SOX13,CHD2,CRIPAK,LONP2,PSMA1,STAT6,CSNK1E,SON,ZNF138,ZNF705A,CDK5RAP1,BNIP2,NTRK1,TFAM,SPRED1,TNFRSF10B,BRWD1,SMAD9,LMF1,DUSP6,TGFBR3,ZBTB16,BAZ2A,RRP8,VARS,LARS,PHF19,LMCD1,PKD1,PDPK1,TSG101,USF1,FOXC1,KPNA1,SSH1,CDK5RAP3,RAPGEF6,C2CD3,PABPC1,UBR5,FASTK,EYA2,SMARCAD1,WNK1,CC2D1A,GATA2 | 1.122026765 | 2.17E-03 |
| GO:0030032 | lamellipodium assembly | biological_process | CAPZB,ACTR3,SSH2,PXN,SRGAP2,NCK2,ARHGEF7,NUP85,SSH1 | 3.031342311 | 2.22E-03 |
| GO:0016311 | dephosphorylation | biological_process | MYO1D,EPHX2,PTPN22,PNKP,PTPN6,CSNK2A1,IGBP1,PPP5C,SYMPK,FKBP1A,MTMR11,PPM1F,SSH2,RPRD1A,ZCCHC9,PTPRK,NTPCR,NEDD8-MDP1,MDP1,SYTL2,TENC1,MTMR14,PTEN,IQGAP1,PHPT1,PTP4A2,PTPRF,PPP1R10,MEF2A,SMEK1,PTPRS,PTPRC,MTMR9,SEMA4D,TIMM50,CDC14B,THNSL2,PTPRD,PDGFRB,PTPN4,FARP1,PTPN23,PPAP2A,SPRED1,DUSP6,SSH1,EYA2,WNK1 | 1.525203679 | 2.22E-03 |
| GO:0007017 | microtubule-based process | biological_process | NPHP3,HDAC6,DYNC1I1,TTLL3,STARD9,CEP135,AP3S2,MARK4,RANBP1,IGBP1,PLK1,CNP,INO80,NUMA1,PKD2,LMNA,RB1,BLOC1S5,PAFAH1B1,BICD1,NTMT1,GCC2,PLK2,SRGAP2,NCOR1,CDK5RAP2,TBCD,KIFC2,RANBP9,SS18,MEMO1,KLC1,NAV1,DNHD1,FLNA,SUN2,ACTR10,GAPDH,STK36,TBCE,HAUS5,LRPPRC,KIF13B,TTLL11,ATXN3,DYNC1I2,SON,BNIP2,SENP6,CLASP1 | 1.510384809 | 2.23E-03 |
| GO:0009199 | ribonucleoside triphosphate metabolic process | biological_process | CRBN,RAB3GAP2,DHX34,EIF2B4,MYO1D,RALGAPA2,SEPT5,ATP2B1,RAB34,BCL6,GBP3,MCF2L,ARHGEF12,ATP6V1D,ARHGEF25,RGL4,STARD13,ABCC1,DDX23,DNAJC10,RAB35,RANBP1,SIPA1L1,DDX39A,KRIT1,SKIV2L,MINK1,RHOF,EEF1A1,DHX9,TBC1D2B,DNM1L,UPF1,HERC2,CHD6,TBC1D10B,SEPT4,EFTUD2,TBC1D14,TNK2,GIT2,MTG1,RAB18,PMS1,PLEKHG4,NADK,FAM13A,INO80,RALGPS2,PLEKHG5,DDX58,SNX13,NF1,RTKN,G3BP1,RAB31,GNAI1,PAFAH1B1,DDX6,ACAP2,RGS3,CYTH2,FLCN,ARHGAP9,IQGAP1,CTNS,SRGAP2,ATP11B,DDX41,RNF213,ABCA2,DENND4C,MAP4K4,ITPA,PSMC6,TBCD,SKIV2L2,PSMC4,ARHGAP29,SGSM3,GOPC,RHEB,SEMA4D,GNB3,GRPEL2,TBC1D22A,RAB5A,ATP5A1,TMED2,RASGRF2,AK5,ATP8B2,ARHGEF7,ASAP1,RGS2,RAD51B,FARP1,RAP1B,SMARCA4,DHX40,DOCK8,LONRF3,MYO1E,RGL2,CHD2,LONP2,ACIN1,PSD3,BNIP2,NTRK1,UCK1,DHX37,RAPGEF6,DENND6B | 1.29500852 | 2.24E-03 |
| GO:0010558 | negative regulation of macromolecule biosynthetic process | biological_process | KANK2,EIF2B4,TNRC6A,SIRT2,NOC2L,SIN3B,CBX5,SUPT5H,BCL6,TBX2,CUX1,EED,FMR1,SMAD7,HDAC6,EHMT1,ZNF496,LANCL2,LEF1,SUPT4H1,USP47,PCGF6,IGBP1,PLK1,HDGF,TBX18,DR1,BCLAF1,GIGYF2,ZNF540,FGFR1,HSF4,CAPRIN1,CELF1,PAF1,RNF8,MDM2,PPM1F,YY1,PFDN5,CREB1,SRP9,PTPRK,ZEB1,IFITM3,RPS6KA5,NIPBL,RB1,PRMT5,ZFPM2,RNF168,CHMP1A,ZNF263,NR1H3,GRB10,FLCN,VPS72,RUNX2,FBXW7,NCOR1,MEF2A,SETD8,TRIM28,UBP1,ZNF148,STAG2,TCF4,ACD,SEMA4D,SMAD4,CREBZF,ING4,CD276,GLI3,ENG,SIRT7,GAPDH,WWP1,PHF12,MDFI,CIRBP,HINFP,MLX,GLIS3,SMARCA4,PER3,GSK3A,NCOR2,PHF21A,PDCD4,STAT6,ZBTB16,BAZ2A,RRP8,LMCD1,TSG101,CC2D1A,GATA2 | 1.325620466 | 2.24E-03 |
| GO:0032069 | regulation of nuclease activity | biological_process | ACADVL,VAPB,XBP1,ASNS,HDGF,SEC31A,LMNA,TPP1,HERPUD1,PDIA5,YIF1A,TLN1,GSK3A | 2.432558645 | 2.25E-03 |
| GO:0016071 | mRNA metabolic process | biological_process | PSMB10,XRN1,SFSWAP,CDK13,SART1,SUPT5H,RBM17,CLNS1A,RNH1,PSMB9,SNRNP70,DDX23,METTL3,NOL3,PRPF40A,DDX39A,SUGP1,UPF3A,DHX9,UPF1,RC3H1,SYMPK,EFTUD2,PRPF3,PAIP1,CELF1,SF3A2,PAF1,RPL27,EIF4B,RPL9,HNRNPA3,PRMT5,DDX6,PAN2,RPL24,RPL37A,SRPK1,CSTF1,RQCD1,PARN,DDX41,SRRM2,PSMC6,SKIV2L2,PRPF8,PSMC4,HNRNPL,HNRNPH3,SRSF10,RPL4,FIP1L1,THOC2,NCBP2,TGS1,CDK11A,RPLP0,CLASRP,SNRPE,PRPF4B,PSMA1,SON,LUC7L3,PABPC1,PABPN1 | 1.426255883 | 2.27E-03 |
| GO:0009154 | purine ribonucleotide catabolic process | biological_process | CRBN,RAB3GAP2,DHX34,EIF2B4,MYO1D,RALGAPA2,SEPT5,ATP2B1,RAB34,BCL6,GBP3,MCF2L,ARHGEF12,ATP6V1D,ARHGEF25,RGL4,STARD13,ABCC1,DDX23,DNAJC10,RAB35,RANBP1,SIPA1L1,DDX39A,KRIT1,SKIV2L,MINK1,RHOF,EEF1A1,DHX9,PDE7B,TBC1D2B,DNM1L,UPF1,HERC2,CHD6,TBC1D10B,SEPT4,EFTUD2,TBC1D14,TNK2,GIT2,MTG1,RAB18,PMS1,PDE4D,PLEKHG4,FAM13A,INO80,RALGPS2,PLEKHG5,DDX58,SNX13,NF1,RTKN,G3BP1,RAB31,GNAI1,PAFAH1B1,PDE8A,DDX6,ACAP2,RGS3,CYTH2,ARHGAP9,IQGAP1,SRGAP2,ATP11B,DDX41,RNF213,ABCA2,DENND4C,MAP4K4,ITPA,PSMC6,TBCD,SKIV2L2,PSMC4,ARHGAP29,SGSM3,GOPC,RHEB,SEMA4D,GNB3,GRPEL2,TBC1D22A,RAB5A,ATP5A1,TMED2,RASGRF2,ATP8B2,ARHGEF7,ASAP1,RGS2,RAD51B,FARP1,RAP1B,SMARCA4,DHX40,DOCK8,LONRF3,MYO1E,RGL2,CHD2,LONP2,ACIN1,PSD3,BNIP2,NTRK1,DHX37,RAPGEF6,DENND6B | 1.296335773 | 2.36E-03 |
| GO:0071310 | cellular response to organic substance | biological_process | ACADVL,IGF1R,RAF1,F11R,COL2A1,HLA-DPB1,CMPK2,CNTF,EEF2K,VAPB,NUP98,SMPD4,SMAD7,HDAC6,GLG1,ATP6V1D,VRK2,DERL2,IL15RA,LANCL2,LEF1,PAX8,HLA-C,XBP1,HLA-DQA1,XAF1,PTPN6,PRKACA,STAT2,ASNS,COL16A1,HDGF,NPC1,ZC3H12A,NUP210,IL13RA1,CAMK2D,FGFR1,ADCY4,PDE4D,PAF1,SHARPIN,SEC31A,MDM2,RHBDD1,FKBP1A,CREB1,NPTN,TNFRSF25,PTPRK,ZEB1,EIF4B,IFITM3,RPS6KA5,RAB31,CAPN10,RXRB,LMNA,LTBP4,PAFAH1B1,IL18,TPP1,AACS,NR1H3,GRB10,FLCN,NRP1,PTEN,FYN,RUNX2,PHPT1,HERPUD1,RQCD1,PXN,KPNB1,NCOR1,MEF2A,OXCT1,LIFR,FIBP,USP15,DDX41,HLA-F,DENND4C,CSK,PTPRC,NUP37,IL10RA,PAK1,LEPROT,LEPR,RAB10,RHEB,CTSH,GNB3,CSF1R,ATP6V0A1,SMAD4,TGFB1I1,DTYMK,NR2C2,IRF9,ENG,ARNT,NOX4,GAPDH,PDIA5,NUP85,ITGA5,PDGFRB,EPOR,TNFRSF14,YIF1A,TLN1,FGF14,GSK3A,NCOR2,IGF2,PTGIS,ATXN3,AMFR,STAT6,ROBO2,NTRK1,SMAD9,DUSP6,TGFBR3,PDPK1,USF1,KPNA1,SSH1,FMOD,ZC3H15,PGRMC2 | 1.263353922 | 2.37E-03 |
| GO:0005739 | mitochondrion | cellular_component | SLC25A37,KANK2,ACADVL,CKB,PTS,RAI14,RAF1,TSTD1,TAZ,MARCH5,CMPK2,ENOSF1,SHMT2,NLN,PGS1,SLC9B2,AMT,VRK2,NARS,H6PD,GLS,BCL2L13,BCL2L11,GLOD4,STARD13,FDPS,GLT8D1,DDX23,MPDU1,NOL3,RAB35,XAF1,PRKACA,RPP14,TTC19,DNM1L,PTGES2,FDXR,HERC2,SEPT4,RAB24,CNP,CLN8,GCDH,SLC16A1,MTG1,RARS,ALDH18A1,TIMM23,PAF1,SGK1,TCHP,CPT1B,IDI1,RHBDD1,IDH3G,GPAT2,ALDH6A1,ALKBH3,ADSL,CASP2,NUDT6,DHRS1,LYRM2,MTCH1,TPP1,SH3BP5,GARS,MRPS7,PLD6,FYN,IDH1,SRGAP2,OXCT1,FECH,ERAL1,COX7A2L,FIBP,SSBP1,MAPK8,AFF4,COX14,PSMC4,PPA2,ATPAF2,TIMM50,HSD17B4,RPUSD4,GRPEL2,DDAH1,DTYMK,GOLPH3,DLST,MRPL49,CA5B,BCS1L,ATP5A1,NDUFV1,MAPK12,NDUFS2,NOX4,ETFA,MTRF1L,SLC25A6,PRELID1,SDHA,REXO2,IDH3B,RGS2,NIT1,DIABLO,LETMD1,LRPPRC,ACYP2,POLG,MRPL3,FPGS,SFXN3,D2HGDH,ATXN3,PSTK,CARS2,SLC25A24,CLIC4,OXNAD1,TFAM,SLC25A46,ZDHHC8,SIRT3,VARS,LETM1,UQCRH,DDAH2,HEMK1,MTO1,FASTK,EYA2,BCL2L2 | 1.258852173 | 2.41E-03 |
| GO:0009261 | ribonucleotide catabolic process | biological_process | CRBN,RAB3GAP2,DHX34,EIF2B4,MYO1D,RALGAPA2,SEPT5,ATP2B1,RAB34,BCL6,GBP3,MCF2L,ARHGEF12,ATP6V1D,ARHGEF25,RGL4,STARD13,ABCC1,DDX23,DNAJC10,RAB35,RANBP1,SIPA1L1,DDX39A,KRIT1,SKIV2L,MINK1,RHOF,EEF1A1,DHX9,PDE7B,TBC1D2B,DNM1L,UPF1,HERC2,CHD6,TBC1D10B,SEPT4,EFTUD2,TBC1D14,TNK2,GIT2,MTG1,RAB18,PMS1,PDE4D,PLEKHG4,FAM13A,INO80,RALGPS2,PLEKHG5,DDX58,SNX13,NF1,RTKN,G3BP1,RAB31,GNAI1,PAFAH1B1,PDE8A,DDX6,ACAP2,RGS3,CYTH2,ARHGAP9,IQGAP1,SRGAP2,ATP11B,DDX41,RNF213,ABCA2,DENND4C,MAP4K4,ITPA,PSMC6,TBCD,SKIV2L2,PSMC4,ARHGAP29,SGSM3,GOPC,RHEB,SEMA4D,GNB3,GRPEL2,TBC1D22A,RAB5A,ATP5A1,TMED2,RASGRF2,ATP8B2,ARHGEF7,ASAP1,RGS2,RAD51B,FARP1,RAP1B,SMARCA4,DHX40,DOCK8,LONRF3,MYO1E,RGL2,CHD2,LONP2,ACIN1,PSD3,BNIP2,NTRK1,DHX37,RAPGEF6,DENND6B | 1.295223038 | 2.43E-03 |
| GO:1901292 | nucleoside phosphate catabolic process | biological_process | CRBN,RAB3GAP2,DHX34,EIF2B4,MYO1D,RALGAPA2,SEPT5,ATP2B1,RAB34,BCL6,GBP3,MCF2L,ARHGEF12,ATP6V1D,ARHGEF25,RGL4,STARD13,ABCC1,DDX23,DNAJC10,RAB35,RANBP1,SIPA1L1,DDX39A,KRIT1,SKIV2L,MINK1,RHOF,EEF1A1,DHX9,PDE7B,TBC1D2B,DNM1L,UPF1,HERC2,CHD6,TBC1D10B,SEPT4,EFTUD2,CNP,TBC1D14,TNK2,GIT2,MTG1,RAB18,PMS1,PDE4D,PLEKHG4,FAM13A,INO80,RALGPS2,PLEKHG5,DDX58,SNX13,NF1,RTKN,G3BP1,RAB31,GALT,GNAI1,PAFAH1B1,PDE8A,DDX6,ACAP2,RGS3,CYTH2,ARHGAP9,IQGAP1,SRGAP2,ATP11B,DDX41,RNF213,ABCA2,DENND4C,MAP4K4,ITPA,PSMC6,TBCD,SKIV2L2,PSMC4,ARHGAP29,SGSM3,GOPC,RHEB,SEMA4D,GNB3,GRPEL2,TBC1D22A,RAB5A,ATP5A1,TMED2,RASGRF2,ATP8B2,ARHGEF7,ASAP1,RGS2,RAD51B,FARP1,RAP1B,SMARCA4,DHX40,DOCK8,LONRF3,GSK3A,MYO1E,RGL2,CHD2,LONP2,ACIN1,PSD3,BNIP2,NTRK1,DHX37,RAPGEF6,DENND6B | 1.290052237 | 2.44E-03 |
| GO:0009141 | nucleoside triphosphate metabolic process | biological_process | CRBN,RAB3GAP2,DHX34,EIF2B4,MYO1D,RALGAPA2,SEPT5,ATP2B1,RAB34,BCL6,GBP3,MCF2L,ARHGEF12,ATP6V1D,ARHGEF25,RGL4,STARD13,ABCC1,DDX23,DNAJC10,RAB35,RANBP1,SIPA1L1,DDX39A,KRIT1,SKIV2L,MINK1,RHOF,EEF1A1,DHX9,TBC1D2B,DNM1L,UPF1,HERC2,CHD6,TBC1D10B,SEPT4,EFTUD2,TBC1D14,TNK2,GIT2,MTG1,RAB18,PMS1,PLEKHG4,NADK,FAM13A,INO80,RALGPS2,PLEKHG5,DDX58,SNX13,NF1,RTKN,G3BP1,RAB31,GNAI1,PAFAH1B1,DDX6,ACAP2,RGS3,CYTH2,FLCN,ARHGAP9,IQGAP1,CTNS,SRGAP2,ATP11B,DDX41,RNF213,ABCA2,DENND4C,MAP4K4,ITPA,PSMC6,TBCD,SKIV2L2,PSMC4,ARHGAP29,SGSM3,GOPC,RHEB,SEMA4D,GNB3,GRPEL2,TBC1D22A,DTYMK,RAB5A,ATP5A1,TMED2,RASGRF2,AK5,ATP8B2,ARHGEF7,ASAP1,RGS2,RAD51B,FARP1,RAP1B,SMARCA4,DHX40,DOCK8,LONRF3,MYO1E,RGL2,CHD2,LONP2,ACIN1,PSD3,BNIP2,NTRK1,UCK1,DHX37,RAPGEF6,DENND6B | 1.290052237 | 2.44E-03 |
| GO:0008092 | cytoskeletal protein binding | molecular_function | CLMN,MYO1D,UTRN,VAPB,GPAA1,HDAC6,DYNC1I1,BCL2L11,STARD9,MARK4,CAPZB,PDLIM5,ACTR3,VASP,PLK1,MIB2,AFAP1,TLN2,INO80,SSH2,TRAF3IP1,FLII,LIMCH1,MAGI1,TPM4,MED28,CAPN10,PKD2,MAPK8IP3,NEXN,PAFAH1B1,ARPC2,SYNE1,STK38L,BICD1,DAAM1,MAST2,FYN,PXN,TNS1,WASH4P,VILL,MYLK,CDK5RAP2,TBCD,AGBL5,NCK2,RAB10,TRPM7,ACTR2,EZR,FHOD1,FLNA,SUN2,ADD3,VEZT,GAPDH,PTPN4,MYO7B,FARP1,LRPPRC,TLN1,TWF1,MYO1E,CORO7,SSH1,CLASP1 | 1.411783324 | 2.50E-03 |
| GO:0004559 | alpha-mannosidase activity | molecular_function | MAN2C1,EDEM2,MAN1A2,MAN2A2,MAN1B1 | 4.823843875 | 2.51E-03 |
| GO:0016569 | covalent chromatin modification | biological_process | SIRT2,NOC2L,EED,HDAC6,EHMT1,LEF1,PCGF1,DR1,JHDM1D,WAC,HSF4,PAF1,RNF8,PHF15,RPS6KA5,NIPBL,PRMT5,USP3,RNF168,FLCN,NCOR1,SETD8,MAPK8,WDR61,ING4,MSL1,SIRT7,PHF1,SMARCA4,SETD2,KANSL3,ATXN3,BAZ2A,PHF19,UBR5,EYA2,SMARCAD1,GATA2 | 1.604890391 | 2.57E-03 |
| GO:0009205 | purine ribonucleoside triphosphate metabolic process | biological_process | CRBN,RAB3GAP2,DHX34,EIF2B4,MYO1D,RALGAPA2,SEPT5,ATP2B1,RAB34,BCL6,GBP3,MCF2L,ARHGEF12,ATP6V1D,ARHGEF25,RGL4,STARD13,ABCC1,DDX23,DNAJC10,RAB35,RANBP1,SIPA1L1,DDX39A,KRIT1,SKIV2L,MINK1,RHOF,EEF1A1,DHX9,TBC1D2B,DNM1L,UPF1,HERC2,CHD6,TBC1D10B,SEPT4,EFTUD2,TBC1D14,TNK2,GIT2,MTG1,RAB18,PMS1,PLEKHG4,NADK,FAM13A,INO80,RALGPS2,PLEKHG5,DDX58,SNX13,NF1,RTKN,G3BP1,RAB31,GNAI1,PAFAH1B1,DDX6,ACAP2,RGS3,CYTH2,FLCN,ARHGAP9,IQGAP1,CTNS,SRGAP2,ATP11B,DDX41,RNF213,ABCA2,DENND4C,MAP4K4,ITPA,PSMC6,TBCD,SKIV2L2,PSMC4,ARHGAP29,SGSM3,GOPC,RHEB,SEMA4D,GNB3,GRPEL2,TBC1D22A,RAB5A,ATP5A1,TMED2,RASGRF2,AK5,ATP8B2,ARHGEF7,ASAP1,RGS2,RAD51B,FARP1,RAP1B,SMARCA4,DHX40,DOCK8,LONRF3,MYO1E,RGL2,CHD2,LONP2,ACIN1,PSD3,BNIP2,NTRK1,DHX37,RAPGEF6,DENND6B | 1.290175824 | 2.64E-03 |
| GO:0044270 | cellular nitrogen compound catabolic process | biological_process | RNASEH2B,CRBN,RAB3GAP2,DHX34,EIF2B4,XRN1,MYO1D,RALGAPA2,SEPT5,ATP2B1,RAB34,BCL6,GBP3,MCF2L,ARHGEF12,ATP6V1D,RNH1,PNKP,ARHGEF25,RGL4,STARD13,ABCC1,DDX23,DNAJC10,RAB35,RANBP1,SIPA1L1,DDX39A,KRIT1,SKIV2L,MINK1,RHOF,EEF1A1,UPF3A,DHX9,PDE7B,TBC1D2B,DNM1L,UPF1,RC3H1,HERC2,CHD6,TBC1D10B,SEPT4,EFTUD2,CNP,TBC1D14,TNK2,GIT2,MTG1,RAB18,PAIP1,PMS1,PDE4D,RNASET2,PLEKHG4,DIS3L,FAM13A,INO80,RALGPS2,PLEKHG5,DDX58,RPL27,SNX13,NF1,EIF4B,RTKN,RPL9,G3BP1,RAB31,GALT,GNAI1,PAFAH1B1,PDE8A,DDX6,ACAP2,RGS3,CYTH2,PAN2,RPL24,ARHGAP9,RPL37A,IQGAP1,RQCD1,KPNB1,SRGAP2,ATP11B,PARN,DDX41,RNF213,ABCA2,DENND4C,MAP4K4,ITPA,PSMC6,TBCD,SKIV2L2,PSMC4,ARHGAP29,SGSM3,GOPC,RHEB,SEMA4D,GNB3,GRPEL2,TBC1D22A,RPL4,RAB5A,ATP5A1,TMED2,RASGRF2,ERCC1,ATP8B2,ARHGEF7,ASAP1,RGS2,NCBP2,RAD51B,FARP1,RAP1B,SMARCA4,RPLP0,DHX40,DOCK8,LONRF3,GSK3A,MYO1E,RGL2,CHD2,LONP2,ACIN1,PSD3,BNIP2,NTRK1,DHX37,KPNA1,RAPGEF6,PABPC1,SMARCAD1,DENND6B | 1.251604877 | 2.69E-03 |
| GO:0046700 | heterocycle catabolic process | biological_process | RNASEH2B,CRBN,RAB3GAP2,DHX34,EIF2B4,XRN1,MYO1D,RALGAPA2,SEPT5,ATP2B1,RAB34,BCL6,GBP3,MCF2L,ARHGEF12,ATP6V1D,RNH1,PNKP,ARHGEF25,RGL4,STARD13,ABCC1,DDX23,DNAJC10,RAB35,RANBP1,SIPA1L1,DDX39A,KRIT1,SKIV2L,MINK1,RHOF,EEF1A1,UPF3A,DHX9,PDE7B,TBC1D2B,DNM1L,UPF1,RC3H1,HERC2,CHD6,TBC1D10B,SEPT4,EFTUD2,CNP,TBC1D14,TNK2,GIT2,MTG1,RAB18,PAIP1,PMS1,PDE4D,RNASET2,PLEKHG4,DIS3L,FAM13A,INO80,RALGPS2,PLEKHG5,DDX58,RPL27,SNX13,NF1,EIF4B,RTKN,RPL9,G3BP1,RAB31,GALT,GNAI1,PAFAH1B1,PDE8A,DDX6,ACAP2,RGS3,CYTH2,PAN2,RPL24,ARHGAP9,RPL37A,IQGAP1,RQCD1,KPNB1,SRGAP2,ATP11B,PARN,DDX41,RNF213,ABCA2,DENND4C,MAP4K4,ITPA,PSMC6,TBCD,SKIV2L2,PSMC4,ARHGAP29,SGSM3,GOPC,RHEB,SEMA4D,GNB3,GRPEL2,TBC1D22A,RPL4,RAB5A,ATP5A1,TMED2,RASGRF2,ERCC1,ATP8B2,ARHGEF7,ASAP1,RGS2,NCBP2,RAD51B,FARP1,RAP1B,SMARCA4,RPLP0,DHX40,DOCK8,LONRF3,GSK3A,MYO1E,RGL2,CHD2,LONP2,ACIN1,PSD3,BNIP2,NTRK1,DHX37,KPNA1,RAPGEF6,PABPC1,SMARCAD1,DENND6B | 1.251604877 | 2.69E-03 |
| GO:0048519 | negative regulation of biological process | biological_process | FZD6,CRBN,KANK2,ACADVL,EIF2B4,RAI1,PSMB10,CLMN,IGF1R,LAMB1,NPHP3,TNRC6A,SIRT2,NOC2L,RAF1,LEPRE1,PPP1R13B,GAS8,RSC1A1,SFSWAP,BDNF,SIN3B,CBX5,SART1,COL2A1,SUPT5H,MARCH5,UBXN1,DPP4,LUC7L,BCL6,TBX2,PTPN22,CNTF,CUX1,EED,FMR1,SMAD7,USP4,HDAC6,GLG1,ARHGEF12,EHMT1,ZNF496,HGS,LANCL2,SYTL4,LEF1,PAX8,SUPT4H1,PSMB9,ADAMTS1,MEPE,NISCH,UHMK1,USP47,ADAM8,NOL3,CAPZB,DNAJC10,CD9,PCGF6,KRIT1,PTPN6,LHX4,CSNK2A1,IGBP1,PRKACA,ANAPC4,PLK1,ASNS,HDGF,RC3H1,NPC1,ZC3H12A,CLN8,TBX18,DR1,BCLAF1,CAMK2D,JAM2,GIGYF2,TBC1D14,WAC,STK4,TRO,ZNF540,TPCN2,FGFR1,HSF4,CAPRIN1,CELF1,PAF1,SHARPIN,TCHP,RNF8,MDM2,RHBDD1,FKBP1A,PRKCH,PPM1F,YY1,PFDN5,CREB1,SRP9,DDX58,PTPRK,SNX13,DFNA5,RHBDF1,NF1,ZEB1,IFITM3,ATG12,COL18A1,MED28,NPR1,RPS6KA5,G3BP1,NIPBL,PKD2,CASP2,MITF,RB1,PRMT5,ZFPM2,TXNDC5,RNF168,PAFAH1B1,SLFN11,CHMP1A,ANXA5,SH3BP5,ZNF263,BICD1,RGS3,NR1H3,GRB10,PLK2,FLCN,NRP1,CUL4A,CHFR,TENC1,IGFBP6,FAP,VPS72,PTEN,FYN,SRPK1,RUNX2,IQGAP1,FBXW7,PHPT1,LGMN,RQCD1,SRGAP2,NCOR1,MEF2A,PRKRIP1,SETD8,PIAS2,VILL,MAPK8,UPK3B,USP15,TRIM28,CSK,CDK5RAP2,PTPRC,PSMC6,TBCD,UBP1,CDK6,WDR61,ZNF148,PSMC4,SGSM3,STAG2,GOPC,PAK1,NCK2,LEPROT,RHEB,CTSH,TCF4,ACD,SEMA4D,DGKZ,PIWIL4,SRSF10,SMAD4,C1QTNF3,TGFB1I1,CREBZF,ING4,CD276,CDC14B,LRPAP1,FLNA,ATP5A1,GLI3,MAPK12,EPS15L1,EPN1,ENG,SIRT7,NOX4,GAPDH,ERCC1,PHF1,BICC1,NRBP2,WWP1,ARHGEF7,PHF12,MED6,UNC5B,MDFI,CIRBP,ITGA5,RGS2,HINFP,STAM2,NCBP2,LPCAT1,MLX,GLIS3,TNFRSF14,DBF4,RUNX1,SMARCA4,RHBDF2,PER3,CD164,ADRBK2,GSK3A,ANKRD6,NCOR2,TWF1,PPAP2A,PTGIS,PHF21A,PDCD4,SNX14,CRIPAK,PSMA1,STAT6,ROBO2,CSNK1E,SON,PMP22,CLIC4,CDK5RAP1,BNIP2,NTRK1,SPRED1,DUSP6,TGFBR3,ZBTB16,BAZ2A,RRP8,LMCD1,PKD1,PDPK1,TSG101,USF1,FOXC1,DDAH2,STK24,PABPC1,UBR5,WNK1,CLASP1,CC2D1A,PLA2G16,GATA2,BCL2L2 | 1.157771819 | 2.73E-03 |
| GO:0035091 | phosphatidylinositol binding | molecular_function | PLEKHA3,PLD1,GPAA1,MCF2L,LANCL2,NISCH,RAB35,SGK1,ZCCHC14,ZFYVE26,SNX13,SNX21,PLEKHA2,SYTL2,PXDC1,SNX17,PHF12,SNX27,TWF1,WDFY3,MYO1E,SNX14 | 1.892667406 | 2.79E-03 |
| GO:0046434 | organophosphate catabolic process | biological_process | CRBN,RAB3GAP2,DHX34,EIF2B4,MYO1D,RALGAPA2,SEPT5,ATP2B1,RAB34,BCL6,GBP3,SMPD4,MCF2L,ARHGEF12,ATP6V1D,ARHGEF25,RGL4,STARD13,ABCC1,DDX23,DNAJC10,RAB35,RANBP1,SIPA1L1,DDX39A,KRIT1,SKIV2L,MINK1,RHOF,EEF1A1,DHX9,PDE7B,TBC1D2B,DNM1L,UPF1,HERC2,CHD6,TBC1D10B,SEPT4,EFTUD2,CNP,TBC1D14,TNK2,GIT2,MTG1,RAB18,PMS1,PDE4D,PLEKHG4,FAM13A,INO80,RALGPS2,PLEKHG5,DDX58,SNX13,NF1,RTKN,G3BP1,RAB31,GALT,GNAI1,PAFAH1B1,PDE8A,DDX6,ACAP2,RGS3,CYTH2,ARHGAP9,PTEN,IQGAP1,SRGAP2,ATP11B,DDX41,RNF213,ABCA2,DENND4C,MAP4K4,ITPA,PSMC6,TBCD,SKIV2L2,PSMC4,ARHGAP29,SGSM3,GOPC,RHEB,SEMA4D,GNB3,GRPEL2,TBC1D22A,RAB5A,ATP5A1,TMED2,RASGRF2,ATP8B2,ARHGEF7,ASAP1,RGS2,RAD51B,FARP1,RAP1B,SMARCA4,DHX40,DOCK8,LONRF3,GSK3A,MYO1E,PGM2,RGL2,CHD2,LONP2,ACIN1,PSD3,BNIP2,NTRK1,DHX37,RAPGEF6,DENND6B | 1.280008562 | 2.79E-03 |
| GO:0006396 | RNA processing | biological_process | SFSWAP,CDK13,RBM6,SART1,SUPT5H,RBM17,CLNS1A,TYW1B,RBPMS,SNRNP70,DDX23,NOL3,PRPF40A,DDX39A,SUGP1,RPP14,DHX9,CCNL1,SYMPK,EFTUD2,PRPF3,PAIP1,CELF1,SF3A2,PAF1,CCNL2,EIF4B,HNRNPA3,NOL8,PRMT5,NSA2,BICD1,PAN2,SRPK1,CSTF1,INTS4,RQCD1,PARN,DDX41,SRRM2,SKIV2L2,PRPF8,HNRNPL,HNRNPH3,WDR4,SRSF10,RBMS1,CLK3,FIP1L1,THOC2,NCBP2,TGS1,CDK11A,CLASRP,CLK4,ZNF638,SNRPE,PRPF4B,FTSJ3,SON,CDK5RAP1,ZFC3H1,RRP8,LUC7L3,ARL6IP4,MTO1,PABPC1,FASTK,PABPN1 | 1.397912244 | 2.80E-03 |
| GO:0080008 | Cul4-RING ubiquitin ligase complex | cellular_component | CRBN,DCAF11,DCAF8,CUL4A,DCAF6,DCAF17 | 3.998093649 | 2.81E-03 |
| GO:0005932 | microtubule basal body | cellular_component | GAS8,PKD2,TCTN1,RAB8A,WDR35,EVC,EZR,DZIP1,CC2D2A,PTPN23,TTLL11,C2CD3 | 2.469410783 | 2.92E-03 |
| GO:0005768 | endosome | cellular_component | USP10,AVL9,RAB34,HLA-DPB1,PLD1,HGS,DERL2,SYTL4,HLA-C,NISCH,HLA-DQA1,RAB35,VPS52,NPC1,MIB2,SLC11A2,VAMP7,HLA-DMB,TNK2,TPCN2,TAB2,SNX13,IFITM3,RAB31,STARD3,CHMP1A,ARPC2,CCDC115,FYN,PTP4A2,LGMN,CTNS,SNX17,ATP11B,WASH4P,HLA-F,ABCA2,RAB8A,APPL2,FLOT1,LEPROT,RAB10,VPS45,ATP6V0A1,GOLPH3,RAB5A,SUN2,MCOLN1,VAMP4,STAM2,SNX27,PTPN23,CD164,NTRK1,TSG101,CD63,SCAMP1,DENND6B | 1.444151265 | 2.97E-03 |
| GO:0009144 | purine nucleoside triphosphate metabolic process | biological_process | CRBN,RAB3GAP2,DHX34,EIF2B4,MYO1D,RALGAPA2,SEPT5,ATP2B1,RAB34,BCL6,GBP3,MCF2L,ARHGEF12,ATP6V1D,ARHGEF25,RGL4,STARD13,ABCC1,DDX23,DNAJC10,RAB35,RANBP1,SIPA1L1,DDX39A,KRIT1,SKIV2L,MINK1,RHOF,EEF1A1,DHX9,TBC1D2B,DNM1L,UPF1,HERC2,CHD6,TBC1D10B,SEPT4,EFTUD2,TBC1D14,TNK2,GIT2,MTG1,RAB18,PMS1,PLEKHG4,NADK,FAM13A,INO80,RALGPS2,PLEKHG5,DDX58,SNX13,NF1,RTKN,G3BP1,RAB31,GNAI1,PAFAH1B1,DDX6,ACAP2,RGS3,CYTH2,FLCN,ARHGAP9,IQGAP1,CTNS,SRGAP2,ATP11B,DDX41,RNF213,ABCA2,DENND4C,MAP4K4,ITPA,PSMC6,TBCD,SKIV2L2,PSMC4,ARHGAP29,SGSM3,GOPC,RHEB,SEMA4D,GNB3,GRPEL2,TBC1D22A,RAB5A,ATP5A1,TMED2,RASGRF2,AK5,ATP8B2,ARHGEF7,ASAP1,RGS2,RAD51B,FARP1,RAP1B,SMARCA4,DHX40,DOCK8,LONRF3,MYO1E,RGL2,CHD2,LONP2,ACIN1,PSD3,BNIP2,NTRK1,DHX37,RAPGEF6,DENND6B | 1.284732044 | 3.03E-03 |
| GO:0006984 | ER-nucleus signaling pathway | biological_process | ACADVL,VAPB,DERL2,XBP1,ASNS,HDGF,SEC31A,LMNA,TPP1,FBXW7,HERPUD1,PDIA5,YIF1A,TLN1,GSK3A,AMFR | 2.134278415 | 3.04E-03 |
| GO:0009059 | macromolecule biosynthetic process | biological_process | FZD6,OBFC1,PBX2,KANK2,EIF2B4,GTF3C2,RAI1,IGF1R,TNRC6A,SIRT2,MYNN,TRNAU1AP,NOC2L,TARS,ZNF131,RSC1A1,SFSWAP,CDK13,SIN3B,CBX5,SUPT5H,SUPT20H,ST3GAL1,PWP1,BCL6,FUBP1,ZNF783,TBX2,MMS19,EEF2K,GPAA1,CUX1,NUP98,EED,FMR1,SMAD7,MCF2L,HDAC6,EHMT1,ZNF496,NARS,LANCL2,PNKP,LEF1,PAX8,SUPT4H1,ZNF83,EMX2,RBPMS,XYLT1,ZSCAN31,XBP1,PAM,APITD1,UHMK1,USP47,ADAM8,POLR3E,GABPB1,PCGF6,EEF1A1,LHX4,CSNK2A1,IGBP1,UPF3A,NOD1,STAT2,PIGS,PLK1,ZNF446,PTGES2,UPF1,ZNF621,HDGF,PPP5C,PIGG,NPC1,CCNL1,CHD6,ZC3H12A,FAM58A,TBX18,PIGN,LBX2,PCGF1,DR1,BCLAF1,ZNF721,ZNF397,JHDM1D,ZNF710,GIGYF2,WAC,ZNF142,FUBP3,RARS,ZNF540,FGFR1,HSF4,PAIP1,CAPRIN1,GTF3C1,CELF1,PAF1,TAB2,SGK1,DPF2,RNF8,SEC31A,MDM2,PRKCH,PPM1F,ZNF595,TBP,YY1,INO80,GMEB2,MCFD2,PFDN5,CREB1,SRP9,FLII,RPRD1A,DDX58,RPL27,CCNL2,PTPRK,SERPINH1,ZEB1,EIF4B,IFITM3,ASCC2,RGMB,EBF1,RPL9,MED28,ZNF3,RPS6KA5,NIPBL,ALG6,ST3GAL4,BRD9,GCNT2,ZNF837,PKD2,RXRB,LMNA,RSL1D1,MITF,NOL8,RB1,PRMT5,MZF1,ZFPM2,TP53BP1,RNF168,ZNF865,SENP2,EDEM2,IL18,PUM2,SUB1,CHMP1A,PDE8A,ZNF558,GALNT2,ZNF263,ZNF180,BICD1,ZNF276,NR1H3,GARS,GRB10,MRPS7,USP7,FLCN,ZNF605,ZNF410,RPL24,UST,RPL37A,SAP30BP,MAST2,VPS72,PTEN,RNASEK,RUNX2,CSTF1,FBXW7,SMARCD3,IKBKB,RQCD1,RFX7,NCOR1,PPP1R10,MEF2A,FECH,SETD8,NECAB3,PIAS2,SSBP1,MAPK8,MYCBP2,USP15,DDX41,MAN1A2,PBX3,ZNF565,ABCA2,AFF4,TRIM28,DMTF1,CDK5RAP2,PTPRC,OAZ1,UBP1,WDR61,EBF4,FARSA,ZNF148,ZNF76,STAG2,SP110,PPA2,ST6GALNAC5,PHKG2,NCK2,TCF4,ACD,IKZF5,HMGN2,SEMA4D,SSBP2,ERC1,NFYC,FUT4,PIWIL4,SRSF10,SS18,RCOR3,SMAD4,CHURC1,CHURC1-FNTB,ZNF114,MIER2,TGFB1I1,INO80E,RPL4,ZNF44,CREBZF,ING4,CD276,RBMS1,EIF3M,ZNF687,NR2C2,FHOD1,DNTTIP2,MRPL49,FLNA,IRF9,MGAT5,GLI3,MAPK12,CCDC59,DCAF6,B4GALT4,ENG,SIRT7,ZSCAN5A,TCF12,ARNT,NOX4,ZNF692,EXT1,GAPDH,PHF1,MTRF1L,B3GAT3,STK36,WWP1,PHF12,TBCE,MED6,MDFI,CIRBP,ZNF554,CIZ1,RGS2,HINFP,NCBP2,MAN2A2,MLX,PDGFRB,TGS1,CDK11A,MAN1B1,GLIS3,ELP6,BDP1,DBF4,CANX,RUNX1,MKNK2,SMARCA4,NAA16,LRPPRC,RPLP0,RAD54L2,ZNF518B,CRCP,ZNF90,ZNF638,PER3,CHTF8,GSK3A,SNRPE,POLG,ZNF383,MRPL3,POLR2J3,NCOR2,FPGS,SETD2,PIGO,PDIA3,IGF2,PTGIS,TROVE2,ATXN3,PSTK,PHF21A,PDCD4,SOX13,PGM2,CHD2,STAT6,CARS2,ZNF138,ZNF705A,NTRK1,TFAM,PHKG1,BRWD1,SMAD9,LMF1,TGFBR3,ZBTB16,BAZ2A,SIRT3,SPCS3,EIF3I,RRP8,VARS,LARS,PHF19,LMCD1,PKD1,PDPK1,TSG101,USF1,FOXC1,ACAN,CDK5RAP3,FMOD,ALG9,PABPC1,EYA2,SMARCAD1,CC2D1A,GATA2,PABPN1 | 1.124987494 | 3.08E-03 |
| GO:1901136 | carbohydrate derivative catabolic process | biological_process | CRBN,RAB3GAP2,DHX34,EIF2B4,MYO1D,RALGAPA2,SEPT5,ATP2B1,RAB34,BCL6,GBP3,MCF2L,ARHGEF12,ATP6V1D,ARHGEF25,RGL4,STARD13,ABCC1,DDX23,DNAJC10,RAB35,RANBP1,SIPA1L1,DDX39A,KRIT1,SKIV2L,MINK1,RHOF,EEF1A1,DHX9,PDE7B,TBC1D2B,DNM1L,UPF1,HERC2,CHD6,TBC1D10B,SEPT4,EFTUD2,TBC1D14,TNK2,GIT2,MTG1,RAB18,PMS1,PDE4D,PLEKHG4,FAM13A,INO80,RALGPS2,NAGK,PLEKHG5,DDX58,SNX13,NF1,RTKN,G3BP1,RAB31,GALT,GNAI1,PAFAH1B1,PDE8A,DDX6,ACAP2,RGS3,CYTH2,HEXA,ARHGAP9,IQGAP1,SRGAP2,ATP11B,DDX41,RNF213,ABCA2,DENND4C,MAP4K4,ITPA,PSMC6,TBCD,SKIV2L2,PSMC4,ARHGAP29,SGSM3,GOPC,RHEB,SEMA4D,GNB3,GRPEL2,TBC1D22A,RAB5A,HGSNAT,ATP5A1,TMED2,RASGRF2,GUSB,ATP8B2,ARHGEF7,ASAP1,RGS2,RAD51B,FARP1,RAP1B,SMARCA4,DHX40,DOCK8,LONRF3,GSK3A,MYO1E,PGM2,RGL2,CHD2,LONP2,ACIN1,PSD3,CTBS,BNIP2,NTRK1,DHX37,ACAN,RAPGEF6,FMOD,DENND6B | 1.270217283 | 3.09E-03 |
| GO:0034645 | cellular macromolecule biosynthetic process | biological_process | FZD6,OBFC1,PBX2,KANK2,EIF2B4,GTF3C2,RAI1,IGF1R,TNRC6A,SIRT2,MYNN,TRNAU1AP,NOC2L,TARS,ZNF131,RSC1A1,SFSWAP,CDK13,SIN3B,CBX5,SUPT5H,ST3GAL1,PWP1,BCL6,FUBP1,ZNF783,TBX2,MMS19,EEF2K,GPAA1,CUX1,NUP98,EED,FMR1,SMAD7,MCF2L,HDAC6,EHMT1,ZNF496,NARS,LANCL2,PNKP,LEF1,PAX8,SUPT4H1,ZNF83,EMX2,RBPMS,XYLT1,ZSCAN31,XBP1,PAM,APITD1,UHMK1,USP47,ADAM8,POLR3E,GABPB1,PCGF6,EEF1A1,LHX4,CSNK2A1,IGBP1,UPF3A,NOD1,STAT2,PIGS,PLK1,ZNF446,PTGES2,UPF1,ZNF621,HDGF,PPP5C,PIGG,NPC1,CCNL1,CHD6,ZC3H12A,FAM58A,TBX18,PIGN,LBX2,PCGF1,DR1,BCLAF1,ZNF721,ZNF397,JHDM1D,ZNF710,GIGYF2,WAC,ZNF142,FUBP3,RARS,ZNF540,FGFR1,HSF4,PAIP1,CAPRIN1,GTF3C1,CELF1,PAF1,TAB2,SGK1,DPF2,RNF8,SEC31A,MDM2,PRKCH,PPM1F,ZNF595,TBP,YY1,INO80,GMEB2,MCFD2,PFDN5,CREB1,SRP9,FLII,RPRD1A,DDX58,RPL27,CCNL2,PTPRK,ZEB1,EIF4B,ASCC2,RGMB,EBF1,RPL9,MED28,ZNF3,RPS6KA5,NIPBL,ALG6,ST3GAL4,BRD9,GCNT2,ZNF837,PKD2,RXRB,LMNA,RSL1D1,MITF,NOL8,RB1,PRMT5,MZF1,ZFPM2,TP53BP1,RNF168,ZNF865,SENP2,EDEM2,PUM2,SUB1,CHMP1A,PDE8A,ZNF558,GALNT2,ZNF263,ZNF180,BICD1,ZNF276,NR1H3,GARS,GRB10,MRPS7,USP7,FLCN,ZNF605,ZNF410,RPL24,UST,RPL37A,SAP30BP,VPS72,PTEN,RNASEK,RUNX2,CSTF1,FBXW7,SMARCD3,IKBKB,RQCD1,RFX7,NCOR1,PPP1R10,MEF2A,FECH,SETD8,NECAB3,PIAS2,SSBP1,MAPK8,MYCBP2,USP15,DDX41,MAN1A2,PBX3,ZNF565,ABCA2,AFF4,TRIM28,DMTF1,CDK5RAP2,UBP1,WDR61,EBF4,FARSA,ZNF148,ZNF76,STAG2,SP110,PPA2,ST6GALNAC5,PHKG2,NCK2,TCF4,ACD,IKZF5,HMGN2,SEMA4D,SSBP2,ERC1,NFYC,FUT4,PIWIL4,SRSF10,SS18,RCOR3,SMAD4,CHURC1,CHURC1-FNTB,ZNF114,MIER2,TGFB1I1,INO80E,RPL4,ZNF44,CREBZF,ING4,RBMS1,EIF3M,ZNF687,NR2C2,FHOD1,DNTTIP2,MRPL49,FLNA,IRF9,MGAT5,GLI3,MAPK12,CCDC59,DCAF6,B4GALT4,ENG,SIRT7,ZSCAN5A,TCF12,ARNT,NOX4,ZNF692,EXT1,GAPDH,PHF1,MTRF1L,B3GAT3,STK36,WWP1,PHF12,TBCE,MED6,MDFI,CIRBP,ZNF554,CIZ1,RGS2,HINFP,NCBP2,MAN2A2,MLX,PDGFRB,TGS1,CDK11A,MAN1B1,GLIS3,ELP6,BDP1,DBF4,CANX,RUNX1,MKNK2,SMARCA4,NAA16,LRPPRC,RPLP0,ZNF518B,CRCP,ZNF90,ZNF638,PER3,CHTF8,GSK3A,SNRPE,POLG,ZNF383,MRPL3,POLR2J3,NCOR2,SETD2,PIGO,PDIA3,IGF2,PTGIS,TROVE2,ATXN3,PSTK,PHF21A,PDCD4,SOX13,PGM2,CHD2,STAT6,CARS2,ZNF138,ZNF705A,NTRK1,TFAM,PHKG1,BRWD1,SMAD9,LMF1,TGFBR3,ZBTB16,BAZ2A,SIRT3,SPCS3,EIF3I,RRP8,VARS,LARS,PHF19,LMCD1,PKD1,PDPK1,TSG101,USF1,FOXC1,ACAN,CDK5RAP3,ALG9,PABPC1,EYA2,SMARCAD1,CC2D1A,GATA2,PABPN1 | 1.127665275 | 3.13E-03 |
| GO:0000790 | nuclear chromatin | cellular_component | CBX5,EED,CSNK2A1,TBP,YY1,INO80,CREB1,USP3,NR1H3,RUNX2,SMARCD3,NCOR1,MEF2A,TRIM28,INO80E,SIRT7,PHF12,NCAPD3,SMARCA4,STAT6,FOXC1 | 1.90818106 | 3.17E-03 |
| GO:0016860 | intramolecular oxidoreductase activity | molecular_function | EIF2B4,SPATA20,PTGES2,IDI1,QSOX1,P4HB,PDIA5,EBPL,PDIA3,PTGIS | 2.70135257 | 3.20E-03 |
| GO:0009203 | ribonucleoside triphosphate catabolic process | biological_process | CRBN,RAB3GAP2,DHX34,EIF2B4,MYO1D,RALGAPA2,SEPT5,ATP2B1,RAB34,BCL6,GBP3,MCF2L,ARHGEF12,ATP6V1D,ARHGEF25,RGL4,STARD13,ABCC1,DDX23,DNAJC10,RAB35,RANBP1,SIPA1L1,DDX39A,KRIT1,SKIV2L,MINK1,RHOF,EEF1A1,DHX9,TBC1D2B,DNM1L,UPF1,HERC2,CHD6,TBC1D10B,SEPT4,EFTUD2,TBC1D14,TNK2,GIT2,MTG1,RAB18,PMS1,PLEKHG4,FAM13A,INO80,RALGPS2,PLEKHG5,DDX58,SNX13,NF1,RTKN,G3BP1,RAB31,GNAI1,PAFAH1B1,DDX6,ACAP2,RGS3,CYTH2,ARHGAP9,IQGAP1,SRGAP2,ATP11B,DDX41,RNF213,ABCA2,DENND4C,MAP4K4,ITPA,PSMC6,TBCD,SKIV2L2,PSMC4,ARHGAP29,SGSM3,GOPC,RHEB,SEMA4D,GNB3,GRPEL2,TBC1D22A,RAB5A,ATP5A1,TMED2,RASGRF2,ATP8B2,ARHGEF7,ASAP1,RGS2,RAD51B,FARP1,RAP1B,SMARCA4,DHX40,DOCK8,LONRF3,MYO1E,RGL2,CHD2,LONP2,ACIN1,PSD3,BNIP2,NTRK1,DHX37,RAPGEF6,DENND6B | 1.289303724 | 3.20E-03 |
| GO:0009207 | purine ribonucleoside triphosphate catabolic process | biological_process | CRBN,RAB3GAP2,DHX34,EIF2B4,MYO1D,RALGAPA2,SEPT5,ATP2B1,RAB34,BCL6,GBP3,MCF2L,ARHGEF12,ATP6V1D,ARHGEF25,RGL4,STARD13,ABCC1,DDX23,DNAJC10,RAB35,RANBP1,SIPA1L1,DDX39A,KRIT1,SKIV2L,MINK1,RHOF,EEF1A1,DHX9,TBC1D2B,DNM1L,UPF1,HERC2,CHD6,TBC1D10B,SEPT4,EFTUD2,TBC1D14,TNK2,GIT2,MTG1,RAB18,PMS1,PLEKHG4,FAM13A,INO80,RALGPS2,PLEKHG5,DDX58,SNX13,NF1,RTKN,G3BP1,RAB31,GNAI1,PAFAH1B1,DDX6,ACAP2,RGS3,CYTH2,ARHGAP9,IQGAP1,SRGAP2,ATP11B,DDX41,RNF213,ABCA2,DENND4C,MAP4K4,ITPA,PSMC6,TBCD,SKIV2L2,PSMC4,ARHGAP29,SGSM3,GOPC,RHEB,SEMA4D,GNB3,GRPEL2,TBC1D22A,RAB5A,ATP5A1,TMED2,RASGRF2,ATP8B2,ARHGEF7,ASAP1,RGS2,RAD51B,FARP1,RAP1B,SMARCA4,DHX40,DOCK8,LONRF3,MYO1E,RGL2,CHD2,LONP2,ACIN1,PSD3,BNIP2,NTRK1,DHX37,RAPGEF6,DENND6B | 1.289303724 | 3.20E-03 |
| GO:0006476 | protein deacetylation | biological_process | SIRT2,HDAC6,NIPBL,NCOR1,MAPK8,SIRT7,ATXN3,SPRED1,BAZ2A,SIRT3,SMARCAD1 | 2.555154438 | 3.21E-03 |
| GO:0005638 | lamin filament | cellular_component | LMNA,LMNB1,NARF | 8.395996664 | 3.26E-03 |
| GO:0046907 | intracellular transport | biological_process | SLC25A37,RAB3GAP2,NOC2L,BCL6,CUX1,NUP98,HDAC6,DYNC1I1,HGS,DERL2,SYTL4,RBPMS,COG4,AP3S2,UHMK1,RAB35,RANBP1,DDX39A,KPNA6,UPF3A,PRKACA,NUTF2,UPF1,NPC1,HERC2,CNP,VAMP7,CAMK2D,FYTTD1,BBS1,TPCN2,VTI1A,HPS4,TIMM23,CPT1B,SEC31A,MDM2,SNAP23,FKBP1A,SRP9,DDX58,RPL27,SNX13,AP4B1,NF1,RPL9,RAB31,CAPN10,PKD2,LMNA,STX16,BLOC1S5,TXNDC5,PAFAH1B1,STARD3,SYTL2,BICD1,GCC2,RPL24,RPL37A,STX2,SNX17,KPNB1,PPP1R10,WASH4P,CACNB1,CLTCL1,ABCA2,RAB8A,CSK,PTPRC,STX18,CLTB,GOPC,RAB10,VPS45,ACD,ERC1,TIMM50,OS9,SRSF10,SMAD4,GRPEL2,C1QTNF3,RPL4,FLNA,HGSNAT,ATP5A1,GLI3,TMED2,SDCBP2,THOC2,SCFD1,VTI1B,SLC25A6,VAMP4,MDFI,STAM2,NCBP2,MLX,VPS51,TGS1,LRPPRC,RPLP0,SDAD1,SNX27,KIF13B,PDIA3,LONP2,ATG3,LMF1,SPCS3,PKD1,TSG101,KPNA1,SCAMP1,UBR5,PABPN1 | 1.273854675 | 3.28E-03 |
| GO:0031227 | intrinsic to endoplasmic reticulum membrane | cellular_component | HLA-DPB1,GPAA1,DERL2,HLA-C,HLA-DQA1,MARCH6,PIGS,RHBDD1,EMC3,PKD2,HLA-F,TMEM66,EMC4,ELOVL1,EXT1,CANX,AMFR,ALG9 | 2.015039199 | 3.36E-03 |
| GO:0009146 | purine nucleoside triphosphate catabolic process | biological_process | CRBN,RAB3GAP2,DHX34,EIF2B4,MYO1D,RALGAPA2,SEPT5,ATP2B1,RAB34,BCL6,GBP3,MCF2L,ARHGEF12,ATP6V1D,ARHGEF25,RGL4,STARD13,ABCC1,DDX23,DNAJC10,RAB35,RANBP1,SIPA1L1,DDX39A,KRIT1,SKIV2L,MINK1,RHOF,EEF1A1,DHX9,TBC1D2B,DNM1L,UPF1,HERC2,CHD6,TBC1D10B,SEPT4,EFTUD2,TBC1D14,TNK2,GIT2,MTG1,RAB18,PMS1,PLEKHG4,FAM13A,INO80,RALGPS2,PLEKHG5,DDX58,SNX13,NF1,RTKN,G3BP1,RAB31,GNAI1,PAFAH1B1,DDX6,ACAP2,RGS3,CYTH2,ARHGAP9,IQGAP1,SRGAP2,ATP11B,DDX41,RNF213,ABCA2,DENND4C,MAP4K4,ITPA,PSMC6,TBCD,SKIV2L2,PSMC4,ARHGAP29,SGSM3,GOPC,RHEB,SEMA4D,GNB3,GRPEL2,TBC1D22A,RAB5A,ATP5A1,TMED2,RASGRF2,ATP8B2,ARHGEF7,ASAP1,RGS2,RAD51B,FARP1,RAP1B,SMARCA4,DHX40,DOCK8,LONRF3,MYO1E,RGL2,CHD2,LONP2,ACIN1,PSD3,BNIP2,NTRK1,DHX37,RAPGEF6,DENND6B | 1.28704377 | 3.38E-03 |
| GO:0006195 | purine nucleotide catabolic process | biological_process | CRBN,RAB3GAP2,DHX34,EIF2B4,MYO1D,RALGAPA2,SEPT5,ATP2B1,RAB34,BCL6,GBP3,MCF2L,ARHGEF12,ATP6V1D,ARHGEF25,RGL4,STARD13,ABCC1,DDX23,DNAJC10,RAB35,RANBP1,SIPA1L1,DDX39A,KRIT1,SKIV2L,MINK1,RHOF,EEF1A1,DHX9,PDE7B,TBC1D2B,DNM1L,UPF1,HERC2,CHD6,TBC1D10B,SEPT4,EFTUD2,TBC1D14,TNK2,GIT2,MTG1,RAB18,PMS1,PDE4D,PLEKHG4,FAM13A,INO80,RALGPS2,PLEKHG5,DDX58,SNX13,NF1,RTKN,G3BP1,RAB31,GNAI1,PAFAH1B1,PDE8A,DDX6,ACAP2,RGS3,CYTH2,ARHGAP9,IQGAP1,SRGAP2,ATP11B,DDX41,RNF213,ABCA2,DENND4C,MAP4K4,ITPA,PSMC6,TBCD,SKIV2L2,PSMC4,ARHGAP29,SGSM3,GOPC,RHEB,SEMA4D,GNB3,GRPEL2,TBC1D22A,RAB5A,ATP5A1,TMED2,RASGRF2,ATP8B2,ARHGEF7,ASAP1,RGS2,RAD51B,FARP1,RAP1B,SMARCA4,DHX40,DOCK8,LONRF3,MYO1E,RGL2,CHD2,LONP2,ACIN1,PSD3,BNIP2,NTRK1,DHX37,RAPGEF6,DENND6B | 1.282017705 | 3.38E-03 |
| GO:0000139 | Golgi membrane | cellular_component | HLA-DPB1,ST3GAL1,PLD1,CUX1,SMPD4,GLG1,IL15RA,HLA-C,XYLT1,COG4,HLA-DQA1,RNF24,ACTR3,LMAN2,PTGES2,VTI1A,QSOX1,RHBDF1,ST3GAL4,GCNT2,GOLGA8B,GOLGA8A,MAPK8IP3,STX16,GALNT2,UST,CLSTN2,CLTCL1,MAN1A2,HLA-F,SLC35D2,STX18,CLTB,GOPC,ST6GALNAC5,LEPROT,VPS45,ERC1,FUT4,TMED3,SLC35A4,GOLPH3,MGAT5,TMED2,B4GALT4,SCFD1,PCSK7,EXT1,B3GAT3,VAMP4,MAN2A2,LPCAT1,YIF1A,CORO7,SLC9A8,GORASP1 | 1.445805084 | 3.39E-03 |
| GO:0015036 | disulfide oxidoreductase activity | molecular_function | DNAJC10,TXNL1,PTGES2,QSOX1,TXNDC5,P4HB,PDIA5,PDIA3 | 3.08726008 | 3.42E-03 |
| GO:0017148 | negative regulation of translation | biological_process | EIF2B4,TNRC6A,FMR1,GIGYF2,ZNF540,CAPRIN1,CELF1,RNF8,SRP9,RNF168,GAPDH,CIRBP | 2.413008805 | 3.50E-03 |
| GO:0005694 | chromosome | cellular_component | OBFC1,SIN3B,CBX5,BCL6,NUP98,EED,EHMT1,DYNC1I1,APITD1,CSNK2A1,PLK1,UPF1,RNF8,TBP,YY1,INO80,CREB1,NUMA1,RB1,USP3,TP53BP1,RNF168,PAFAH1B1,CHMP1A,NR1H3,RUNX2,SMARCD3,NCOR1,PPP1R10,MEF2A,SETD8,TRIM28,DSN1,NSFL1C,WDR61,NUP37,STAG2,ACD,HMGN2,INO80E,CENPT,FLNA,SUN2,ADD3,SIRT7,ERCC1,PHF1,PHF12,NUP85,NCAPD3,SMARCA4,LRPPRC,NCOR2,SETD2,PRPF4B,MAU2,STAT6,NSMCE4A,SHPRH,BAZ2A,RRP8,SEPT2,FOXC1,SMARCAD1,CLASP1 | 1.401488914 | 3.51E-03 |
| GO:0015923 | mannosidase activity | molecular_function | MAN2C1,EDEM2,MAN1A2,MAN2A2,MAN1B1 | 4.502254283 | 3.53E-03 |
| GO:0021542 | dentate gyrus development | biological_process | LEF1,EMX2,PTEN,MEF2A,CDK6 | 4.490877498 | 3.57E-03 |
| GO:2000602 | regulation of interphase of mitotic cell cycle | biological_process | KANK2,PSMB10,BCL6,PSMB9,USP47,PTPN6,PAF1,MDM2,INO80,PKD2,CASP2,RB1,SLFN11,CHMP1A,CUL4A,PTEN,PSMC6,PSMC4,DGKZ,SMARCA4,PSMA1 | 1.886168549 | 3.59E-03 |
| GO:0004448 | isocitrate dehydrogenase activity | molecular_function | IDH3G,IDH1,IDH3B | 8.10405771 | 3.61E-03 |
| GO:0006102 | isocitrate metabolic process | biological_process | IDH3G,IDH1,IDH3B | 8.083579496 | 3.64E-03 |
| GO:0046015 | regulation of transcription by glucose | biological_process | CHMP1A,RRP8,USF1 | 8.083579496 | 3.64E-03 |
| GO:0070535 | histone H2A K63-linked ubiquitination | biological_process | RNF8,RNF168,UBR5 | 8.083579496 | 3.64E-03 |
| GO:1901361 | organic cyclic compound catabolic process | biological_process | RNASEH2B,CRBN,RAB3GAP2,DHX34,EIF2B4,XRN1,MYO1D,EPHX2,RALGAPA2,SEPT5,ATP2B1,RAB34,BCL6,GBP3,MCF2L,ARHGEF12,ATP6V1D,RNH1,PNKP,ARHGEF25,RGL4,STARD13,ABCC1,DDX23,DNAJC10,RAB35,RANBP1,SIPA1L1,DDX39A,KRIT1,SKIV2L,MINK1,RHOF,EEF1A1,UPF3A,DHX9,PDE7B,TBC1D2B,DNM1L,UPF1,RC3H1,HERC2,CHD6,TBC1D10B,SEPT4,EFTUD2,CNP,TBC1D14,TNK2,GIT2,MTG1,RAB18,PAIP1,PMS1,PDE4D,RNASET2,PLEKHG4,DIS3L,FAM13A,INO80,RALGPS2,PLEKHG5,DDX58,RPL27,SNX13,NF1,EIF4B,RTKN,RPL9,G3BP1,RAB31,GALT,GNAI1,PAFAH1B1,PDE8A,DDX6,ACAP2,RGS3,CYTH2,PAN2,RPL24,ARHGAP9,RPL37A,IQGAP1,RQCD1,SNX17,KPNB1,SRGAP2,ATP11B,PARN,DDX41,RNF213,ABCA2,DENND4C,MAP4K4,ITPA,PSMC6,TBCD,SKIV2L2,PSMC4,ARHGAP29,SGSM3,GOPC,RHEB,SEMA4D,GNB3,GRPEL2,TBC1D22A,RPL4,RAB5A,ATP5A1,TMED2,RASGRF2,ERCC1,ATP8B2,ARHGEF7,ASAP1,RGS2,NCBP2,RAD51B,FARP1,RAP1B,SMARCA4,RPLP0,DHX40,DOCK8,LONRF3,GSK3A,MYO1E,RGL2,CHD2,LONP2,ACIN1,PSD3,BNIP2,NTRK1,DHX37,KPNA1,RAPGEF6,PABPC1,SMARCAD1,DENND6B | 1.239063351 | 3.65E-03 |
| GO:0072523 | purine-containing compound catabolic process | biological_process | CRBN,RAB3GAP2,DHX34,EIF2B4,MYO1D,RALGAPA2,SEPT5,ATP2B1,RAB34,BCL6,GBP3,MCF2L,ARHGEF12,ATP6V1D,ARHGEF25,RGL4,STARD13,ABCC1,DDX23,DNAJC10,RAB35,RANBP1,SIPA1L1,DDX39A,KRIT1,SKIV2L,MINK1,RHOF,EEF1A1,DHX9,PDE7B,TBC1D2B,DNM1L,UPF1,HERC2,CHD6,TBC1D10B,SEPT4,EFTUD2,TBC1D14,TNK2,GIT2,MTG1,RAB18,PMS1,PDE4D,PLEKHG4,FAM13A,INO80,RALGPS2,PLEKHG5,DDX58,SNX13,NF1,RTKN,G3BP1,RAB31,GNAI1,PAFAH1B1,PDE8A,DDX6,ACAP2,RGS3,CYTH2,ARHGAP9,IQGAP1,SRGAP2,ATP11B,DDX41,RNF213,ABCA2,DENND4C,MAP4K4,ITPA,PSMC6,TBCD,SKIV2L2,PSMC4,ARHGAP29,SGSM3,GOPC,RHEB,SEMA4D,GNB3,GRPEL2,TBC1D22A,RAB5A,ATP5A1,TMED2,RASGRF2,ATP8B2,ARHGEF7,ASAP1,RGS2,RAD51B,FARP1,RAP1B,SMARCA4,DHX40,DOCK8,LONRF3,MYO1E,RGL2,CHD2,LONP2,ACIN1,PSD3,BNIP2,NTRK1,DHX37,RAPGEF6,DENND6B | 1.278758338 | 3.67E-03 |
| GO:0035601 | protein deacylation | biological_process | SIRT2,HDAC6,NIPBL,NCOR1,MAPK8,SIRT7,ATXN3,SPRED1,BAZ2A,SIRT3,SMARCAD1 | 2.511846736 | 3.69E-03 |
| GO:0016236 | macroautophagy | biological_process | SUPT5H,HDAC6,NPC1,ATG4B,TBC1D14,WAC,ATG12,NRBP2,ATG3 | 2.819853313 | 3.74E-03 |
| GO:0009143 | nucleoside triphosphate catabolic process | biological_process | CRBN,RAB3GAP2,DHX34,EIF2B4,MYO1D,RALGAPA2,SEPT5,ATP2B1,RAB34,BCL6,GBP3,MCF2L,ARHGEF12,ATP6V1D,ARHGEF25,RGL4,STARD13,ABCC1,DDX23,DNAJC10,RAB35,RANBP1,SIPA1L1,DDX39A,KRIT1,SKIV2L,MINK1,RHOF,EEF1A1,DHX9,TBC1D2B,DNM1L,UPF1,HERC2,CHD6,TBC1D10B,SEPT4,EFTUD2,TBC1D14,TNK2,GIT2,MTG1,RAB18,PMS1,PLEKHG4,FAM13A,INO80,RALGPS2,PLEKHG5,DDX58,SNX13,NF1,RTKN,G3BP1,RAB31,GNAI1,PAFAH1B1,DDX6,ACAP2,RGS3,CYTH2,ARHGAP9,IQGAP1,SRGAP2,ATP11B,DDX41,RNF213,ABCA2,DENND4C,MAP4K4,ITPA,PSMC6,TBCD,SKIV2L2,PSMC4,ARHGAP29,SGSM3,GOPC,RHEB,SEMA4D,GNB3,GRPEL2,TBC1D22A,RAB5A,ATP5A1,TMED2,RASGRF2,ATP8B2,ARHGEF7,ASAP1,RGS2,RAD51B,FARP1,RAP1B,SMARCA4,DHX40,DOCK8,LONRF3,MYO1E,RGL2,CHD2,LONP2,ACIN1,PSD3,BNIP2,NTRK1,DHX37,RAPGEF6,DENND6B | 1.282547547 | 3.77E-03 |
| GO:0060589 | nucleoside-triphosphatase regulator activity | molecular_function | RAB3GAP2,EIF2B4,RALGAPA2,MCF2L,ARHGEF12,ARHGEF25,RGL4,STARD13,DNAJC10,RANBP1,SIPA1L1,KRIT1,MINK1,TBC1D2B,HERC2,TBC1D10B,TBC1D14,TNK2,GIT2,PLEKHG4,FAM13A,RALGPS2,PLEKHG5,NF1,RTKN,ACAP2,RGS3,CYTH2,ARHGAP9,IQGAP1,SRGAP2,DENND4C,MAP4K4,TBCD,ARHGAP29,SGSM3,GOPC,GRPEL2,TBC1D22A,RASGRF2,ARHGEF7,ASAP1,RGS2,FARP1,DOCK8,RGL2,PSD3,BNIP2,RAPGEF6,DENND6B | 1.471324929 | 3.78E-03 |
| GO:0002429 | immune response-activating cell surface receptor signaling pathway | biological_process | BTN3A1,HLA-DPB1,PTPN22,HLA-DQA1,PTPN6,VASP,RC3H1,TAB2,PRKCH,LCP2,PTEN,FYN,PHPT1,IKBKB,MEF2A,CSK,PTPRC,PAK1,CACNB3,PDPK1 | 1.911011701 | 3.79E-03 |
| GO:0035966 | response to topologically incorrect protein | biological_process | ACADVL,VAPB,HDAC6,DERL2,XBP1,ASNS,HDGF,SEC31A,RHBDD1,SERPINH1,LMNA,EDEM2,TPP1,HERPUD1,PDIA5,YIF1A,TLN1,GSK3A,ATXN3,AMFR | 1.911011701 | 3.79E-03 |
| GO:0031589 | cell-substrate adhesion | biological_process | LAMB1,UTRN,BCL6,BCL2L11,HSD17B12,MINK1,PPM1F,THBS3,PTPRK,NF1,ITGA3,PLEKHA2,ARPC2,ADAM15,PTEN,PXN,SRGAP2,TBCD,CDK6,ABI3BP,TRPM7,PPFIA1,COL8A1,ITGA11,COL13A1,ATXN3,PKD1,PDPK1 | 1.706939863 | 3.80E-03 |
| GO:0004386 | helicase activity | molecular_function | DHX34,ERCC6L2,DDX23,DDX39A,SKIV2L,DHX9,UPF1,CHD6,INO80,DDX58,G3BP1,DDX6,SSBP1,DDX41,SKIV2L2,SMARCA4,DHX40,RAD54L2,CHD2,SHPRH,DHX37,SMARCAD1 | 1.845644613 | 3.81E-03 |
| GO:0005885 | Arp2/3 protein complex | cellular_component | ARPC4-TTLL3,ACTR3,ARPC2,ACTR2 | 5.597331109 | 3.84E-03 |
| GO:0032880 | regulation of protein localization | biological_process | CADM1,RALGAPA2,NLRP1,SYTL4,RBPMS,PAM,UHMK1,ADAM8,PRKACA,DNM1L,VAMP7,DISP1,MDM2,DDX58,RHBDF1,NF1,PKD2,RSL1D1,RB1,GCC2,NR1H3,FLCN,FBXW7,MAPK8,MYCBP2,RAB8A,CSK,AAK1,GOPC,LEPROT,CSF1R,SMAD4,C1QTNF3,FLNA,GLI3,VAMP4,MDFI,RHBDF2,SEPT2,PKD1,PDPK1,KPNA1,UBR5 | 1.520533326 | 3.87E-03 |
| GO:0032270 | positive regulation of cellular protein metabolic process | biological_process | ACADVL,PSMB10,IGF1R,RAF1,ZFP91,CNTF,VAPB,SMAD7,PSMB9,RBPMS,XBP1,APITD1,UHMK1,ADAM8,UPF3A,NOD1,PRKACA,ANAPC4,PLK1,ASNS,HDGF,SEPT4,SYMPK,TNK2,STK4,FGFR1,PAIP1,ADCY4,TAB2,SEC31A,MDM2,FKBP1A,NPTN,NUB1,RPS6KA5,NIPBL,PKD2,LMNA,MAPK8IP3,SENP2,TPP1,NR1H3,FLCN,NRP1,PTEN,IQGAP1,FBXW7,HERPUD1,PXN,NCOR1,CSK,PTPRC,PSMC6,WDR61,PSMC4,PAK1,SEMA4D,CSF1R,C3,SMAD4,CDC14B,ENG,ARNT,NOX4,PHF1,PDIA5,MDFI,CIRBP,ITGA5,PDGFRB,CARD14,TNFRSF14,YIF1A,TLN1,GSK3A,IGF2,PSMA1,CSNK1E,NTRK1,TNFRSF10B,PHF19,PKD1,PDPK1,PABPC1 | 1.332981307 | 3.90E-03 |
| GO:0033043 | regulation of organelle organization | biological_process | NOC2L,CDK13,MARCH5,HDAC6,ARPC4-TTLL3,BCL2L11,PAM,CAPZB,RANBP1,ACTR3,ANAPC4,PLK1,DNM1L,TBC1D14,PPM1F,SSH2,RPS6KA5,NIPBL,RB1,PRMT5,NEXN,ARPC2,PLK2,FLCN,PTEN,PHPT1,NCOR1,MEF2A,WASH4P,VILL,MAPK8,MYCBP2,CDK5RAP2,TBCD,WDR61,PAK1,NCK2,ACD,CSF1R,ACTR2,GOLPH3,FHOD1,NOX4,ERCC1,PHF1,PDGFRB,TWF1,IGF2,CRIPAK,CLIC4,PHF19,SENP6,SSH1,UBR5,CLASP1,GATA2 | 1.434348707 | 3.93E-03 |
| GO:0009966 | regulation of signal transduction | biological_process | FZD6,CDK14,KANK2,IGF1R,NPHP3,RALGAPA2,RAF1,BCL6,PTPN22,ZFP91,CNTF,SMAD7,MCF2L,HDAC6,GLG1,ARHGEF12,VRK2,HGS,LANCL2,LEF1,ARHGEF25,BCL2L11,RBPMS,STARD13,XBP1,ADAM8,SIPA1L1,MINK1,RHOF,PTPN6,CSNK2A1,IGBP1,NOD1,STAT2,TBC1D2B,DNM1L,RC3H1,PPP5C,SHISA5,RHOBTB1,TBC1D10B,SEPT4,MIB2,TBX18,BCLAF1,TBC1D14,USP20,GIT2,STK4,FGFR1,DISP1,TAB2,PLEKHG4,SHARPIN,MDM2,FKBP1A,PRKCH,FAM13A,PFDN5,NPTN,PLEKHG5,SNX13,RHBDF1,NF1,ZEB1,G3BP1,PKD2,RB1,LTBP4,MAPK8IP3,PAFAH1B1,SENP2,MTCH1,ACAP2,USP33,BICD1,RGS3,NR1H3,CYTH2,GRB10,PLK2,FLCN,ARHGAP9,PTEN,FYN,RUNX2,IQGAP1,FBXW7,PHPT1,IKBKB,RQCD1,PXN,SRGAP2,LTBR,NCOR1,SETD8,TCTN1,PIAS2,MAPK8,SH3BP2,USP15,MAP4K4,CSK,PTPRC,RNF146,FLOT1,ARHGAP29,SGSM3,AAK1,PAK1,EVC,NCK2,LEPROT,RHEB,SEMA4D,CSF1R,DGKZ,C3,SMAD4,TBC1D22A,C1QTNF3,TGFB1I1,GOLPH3,LRPAP1,APOL3,FLNA,GLI3,RASGRF2,EPS15L1,EPN1,ENG,ARNT,NOX4,BICC1,STK36,ARHGEF7,ASAP1,UNC5B,MDFI,ITGA5,RGS2,STAM2,PDGFRB,CARD14,FARP1,RUNX1,SMARCA4,ADRBK2,GSK3A,ANKRD6,NLGN2,IGF2,PTGIS,PDCD4,SNX14,RGL2,CRIPAK,PSD3,CSNK1E,BNIP2,NTRK1,SPRED1,TNFRSF10B,DUSP6,TGFBR3,TMEM237,LMCD1,PDPK1,RAPGEF6,C2CD3,UBR5,CC2D1A,GATA2 | 1.207650477 | 3.95E-03 |
| GO:0005802 | trans-Golgi network | cellular_component | HLA-DPB1,SMPD4,PAM,HLA-DQA1,SLC11A2,AP4B1,RAB31,BICD1,GCC2,CYTH2,CLTCL1,CLTB,RAB10,GOLPH3,FLNA,VAMP4,PSD3,SCAMP1 | 1.983306299 | 3.99E-03 |
| GO:0010646 | regulation of cell communication | biological_process | FZD6,CDK14,KANK2,IGF1R,NPHP3,RALGAPA2,RAF1,BDNF,SUPT5H,BCL6,PTPN22,ZFP91,CNTF,SMAD7,MCF2L,HDAC6,GLG1,ARHGEF12,VRK2,HGS,LANCL2,SYTL4,LEF1,PAX8,ARHGEF25,BCL2L11,RBPMS,STARD13,XBP1,NISCH,ADAM8,SIPA1L1,MINK1,RHOF,PTPN6,CSNK2A1,IGBP1,NOD1,PRKACA,STAT2,TBC1D2B,DNM1L,RC3H1,PPP5C,NPC1,SHISA5,RHOBTB1,TBC1D10B,SEPT4,MIB2,TBX18,BCLAF1,TBC1D14,USP20,GIT2,WAC,STK4,FGFR1,DISP1,SNCAIP,TAB2,PLEKHG4,SHARPIN,MDM2,FKBP1A,PRKCH,FAM13A,PFDN5,CREB1,NPTN,PLEKHG5,SNX13,RHBDF1,NF1,ZEB1,G3BP1,CAPN10,PKD2,RB1,LTBP4,MAPK8IP3,PAFAH1B1,SENP2,MTCH1,AACS,ACAP2,USP33,BICD1,RGS3,NR1H3,CYTH2,GRB10,PLK2,FLCN,ARHGAP9,PTEN,FYN,RUNX2,IQGAP1,FBXW7,PHPT1,IKBKB,RQCD1,PXN,SRGAP2,LTBR,NCOR1,MEF2A,OXCT1,SETD8,TCTN1,PIAS2,MAPK8,SH3BP2,USP15,RAB8A,MAP4K4,CSK,PTPRC,RNF146,FLOT1,ARHGAP29,SGSM3,AAK1,PAK1,EVC,NCK2,LEPROT,RHEB,SEMA4D,CSF1R,DGKZ,C3,SMAD4,TBC1D22A,C1QTNF3,TGFB1I1,GOLPH3,LRPAP1,APOL3,FLNA,GLI3,RASGRF2,EPS15L1,EPN1,ENG,ARNT,NOX4,BICC1,NRBP2,SLC25A6,STK36,ARHGEF7,ASAP1,UNC5B,MDFI,ITGA5,RGS2,STAM2,PDGFRB,CARD14,FARP1,RAP1B,RUNX1,SMARCA4,ADRBK2,GSK3A,ANKRD6,NLGN2,IGF2,PTGIS,PDCD4,SNX14,RGL2,CRIPAK,PSD3,CSNK1E,BNIP2,NTRK1,SPRED1,TNFRSF10B,DUSP6,TGFBR3,TMEM237,SPCS3,LMCD1,PDPK1,RAPGEF6,C2CD3,UBR5,CC2D1A,TENM4,GATA2 | 1.192213696 | 4.07E-03 |
| GO:0000151 | ubiquitin ligase complex | cellular_component | CRBN,PPIL2,SPOP,USP47,ANAPC4,MIB2,DCAF11,SHARPIN,RNF8,ANAPC16,DCAF8,RNF168,USP33,CUL4A,FBXW7,OS9,DCAF6,WWP1,DCAF17,KLHL7,ATG3 | 1.859872679 | 4.30E-03 |
| GO:0019783 | small conjugating protein-specific protease activity | molecular_function | USP10,USP4,USP47,USP3,SENP2,USP33,USP7,USP15,ATXN3,SENP6 | 2.597454394 | 4.31E-03 |
| GO:0042995 | cell projection | cellular_component | FZD6,CADM1,IGF1R,NPHP3,MYO1D,UTRN,RAF1,SEPT5,GAS8,RSC1A1,RAB34,UBXN1,DPP4,FMR1,MCF2L,TTLL3,PAM,MARK4,UHMK1,CAPZB,RAB35,SIPA1L1,MINK1,PDLIM5,ACTR3,VASP,PPP5C,SEPT4,SLC11A2,CNP,VAMP7,CAMK2D,PLCB4,BBS1,TNK2,CAPRIN1,ADCY4,SHARPIN,SNAP23,FKBP1A,TLN2,DDX58,PTPRK,MAGI1,NF1,NEK3,PKD2,STRN4,MAPK8IP3,PAFAH1B1,DNALI1,ARPC2,ADAM15,PLK2,NRP1,MTMR14,FAP,PTEN,FYN,IQGAP1,IFT172,PXN,SRGAP2,TCTN1,MYCBP2,MYLK,RAB8A,SWAP70,CDK6,CLTB,AAK1,GOPC,WDR35,PAK1,EVC,RAB10,RHEB,SEMA6A,CTSH,TRPM7,GNB3,DGKZ,ACTR2,ROBO3,EZR,FHOD1,RAB5A,GLI3,ARHGEF7,CTTN,ITGA5,DZIP1,CC2D2A,FARP1,CANX,KIF13B,PTPN23,TLN1,TTLL11,TWF1,TANC1,PSD3,ROBO2,CLIC4,NTRK1,TMEM237,SEPT2,PKD1,KPNA1,SSH1,C2CD3,TENM4 | 1.273154111 | 4.32E-03 |
| GO:0015924 | mannosyl-oligosaccharide mannosidase activity | molecular_function | EDEM2,MAN1A2,MAN2A2,MAN1B1 | 5.40270514 | 4.37E-03 |
| GO:0005072 | transforming growth factor beta receptor, cytoplasmic mediator activity | molecular_function | SMAD7,SMAD4,ENG,SMAD9 | 5.40270514 | 4.37E-03 |
| GO:0000226 | microtubule cytoskeleton organization | biological_process | HDAC6,TTLL3,STARD9,CEP135,MARK4,RANBP1,PLK1,CNP,INO80,NUMA1,PKD2,LMNA,RB1,PAFAH1B1,BICD1,NTMT1,GCC2,PLK2,SRGAP2,NCOR1,CDK5RAP2,TBCD,RANBP9,SS18,NAV1,FLNA,SUN2,GAPDH,TBCE,HAUS5,ATXN3,SON,BNIP2,SENP6,CLASP1 | 1.587683964 | 4.41E-03 |
| GO:0097354 | prenylation | biological_process | RABGGTA,FNTB,CHURC1-FNTB,RABGGTB | 5.389052997 | 4.41E-03 |
| GO:0018342 | protein prenylation | biological_process | RABGGTA,FNTB,CHURC1-FNTB,RABGGTB | 5.389052997 | 4.41E-03 |
| GO:0007049 | cell cycle | biological_process | MARVELD1,CDK14,KANK2,PSMB10,SIRT2,SEPT5,PPP1R13B,CDK13,SART1,SUPT5H,BCL6,NUP98,LEF1,PSMB9,BCL2L11,STARD9,CEP135,APITD1,UHMK1,USP47,PRPF40A,RANBP1,PTPN6,ACTR3,CSNK2A1,PRKACA,ANAPC4,PLK1,SDCCAG8,ASNS,JAG2,TTC19,UPF1,PPP5C,CCNL1,SEPT4,FAM58A,CAMK2D,GIGYF2,WAC,FGFR1,ERH,PMS1,PAF1,RNF8,MDM2,ZFYVE26,ANAPC16,INO80,CCNDBP1,CCNL2,PTPRK,NEK3,NUMA1,NIPBL,PKD2,CASP2,RB1,PRMT5,GNAI1,USP3,PAFAH1B1,SLFN11,CHMP1A,NTMT1,PLK2,PLD6,FLCN,CUL4A,CHFR,PTEN,FBXW7,NCOR1,SETD8,CLTCL1,DMTF1,CDK5RAP2,PTPRC,PSMC6,DSN1,CDK6,NUP37,APPL2,PSMC4,SGSM3,STAG2,PARD6G,RHEB,DGKZ,PIWIL4,DTYMK,CENPT,ING4,CDCA3,CDC14B,NR2C2,FLNA,SUN2,MAPK12,SIRT7,NUP85,HAUS5,RGS2,HINFP,PDGFRB,NCAPD3,RAD51B,CDK11A,DBF4,SMARCA4,CHTF8,IGF2,DYNC1I2,MAU2,PDCD4,PSMA1,CSNK1E,SON,CDK5RAP1,BNIP2,RRP8,SEPT2,SENP6,PKD1,TSG101,FOXC1,CDK5RAP3,GAK,SMARCAD1,CLASP1,PLA2G16,GORASP1 | 1.243627615 | 4.44E-03 |
| GO:0048583 | regulation of response to stimulus | biological_process | FZD6,CDK14,KANK2,CADM1,IGF1R,NPHP3,RALGAPA2,BTN3A1,RAF1,NLRP1,SUPT5H,HLA-DPB1,BCL6,PTPN22,ZFP91,CNTF,SMAD7,MCF2L,HDAC6,GLG1,ARHGEF12,VRK2,HGS,LANCL2,LEF1,HLA-C,ARHGEF25,BCL2L11,RBPMS,STARD13,XBP1,HLA-DQA1,ADAM8,SIPA1L1,MINK1,RHOF,PTPN6,VASP,CSNK2A1,IGBP1,NOD1,STAT2,TBC1D2B,DNM1L,RC3H1,PPP5C,NPC1,SHISA5,RHOBTB1,TBC1D10B,SEPT4,MIB2,TBX18,BCLAF1,TBC1D14,USP20,GIT2,WAC,STK4,FGFR1,C2,CFB,DISP1,TAB2,PLEKHG4,SHARPIN,RNF8,MDM2,FKBP1A,PRKCH,PPM1F,FAM13A,PFDN5,CREB1,NPTN,PLEKHG5,DDX58,LCP2,SNX13,RHBDF1,NF1,ZEB1,RPS6KA5,G3BP1,PKD2,RB1,LTBP4,MAPK8IP3,RNF168,PAFAH1B1,SENP2,IL18,MTCH1,ACAP2,USP33,BICD1,RGS3,NR1H3,CYTH2,GRB10,PLK2,FLCN,NRP1,ARHGAP9,FAP,PTEN,FYN,RUNX2,IQGAP1,C1R,FBXW7,PHPT1,IKBKB,RQCD1,PXN,SRGAP2,LTBR,NCOR1,MEF2A,FECH,SETD8,TCTN1,PIAS2,MAPK8,SH3BP2,MYLK,USP15,HLA-F,TRIM28,MAP4K4,CSK,PTPRC,RNF146,CDK6,RARRES2,FLOT1,ARHGAP29,SGSM3,AAK1,PAK1,EVC,NCK2,LEPROT,RHEB,CTSH,SEMA4D,CSF1R,DGKZ,C3,SMAD4,TBC1D22A,C1QTNF3,TGFB1I1,GOLPH3,CD276,NR2C2,LRPAP1,APOL3,FLNA,C1S,GLI3,RASGRF2,EPS15L1,EPN1,ENG,ARNT,NOX4,BICC1,NRBP2,SLC25A6,STK36,ARHGEF7,ASAP1,UNC5B,MDFI,ITGA5,RGS2,STAM2,PDGFRB,CARD14,FARP1,RUNX1,SMARCA4,ADRBK2,GSK3A,ANKRD6,NLGN2,IGF2,PTGIS,PDCD4,SNX14,RGL2,CRIPAK,PSMA1,STAT6,PSD3,ROBO2,CSNK1E,CACNB3,NSMCE4A,BNIP2,NTRK1,SPRED1,TNFRSF10B,DUSP6,TGFBR3,TMEM237,LMCD1,PDPK1,USF1,STK24,RAPGEF6,C2CD3,UBR5,CC2D1A,GATA2 | 1.175318505 | 4.56E-03 |
| GO:0031988 | membrane-bounded vesicle | cellular_component | CADM1,LAMB1,SEPT5,BDNF,CPE,RAB34,HLA-DPB1,DPP4,HGS,IL15RA,SYTL4,HLA-C,YIPF1,RGL4,PAM,HLA-DQA1,AP3S2,ADAM8,RAB35,CD9,CNP,VAMP7,CAMK2D,TNK2,FLG,VTI1A,FGFR1,HPS4,SEC31A,MDM2,SNAP23,COL12A1,MCFD2,SNX21,LGALS3BP,RAB31,GNAI1,BLOC1S5,TPP1,SYTL2,EPN2,ANXA5,ADAM15,GARS,SNX17,GGNBP2,SRGAP2,ITGB5,CLTCL1,HLA-F,ABCA2,RAB8A,DENND4C,CLTB,FLOT1,AAK1,GOPC,NCK2,RAB10,CTSH,ATP6V0A1,C3,P4HB,TMED3,CLK3,FLNA,RAB5A,TMED2,VEZT,SCFD1,GAPDH,PDGFRB,VPS51,CANX,PTPN23,CRCP,TLN1,PDIA3,MYO1E,CORO7,DPP7,CLIC4,CTTNBP2,SEC31B,ZDHHC8,PDPK1,CD63 | 1.317553589 | 4.69E-03 |
| GO:0019637 | organophosphate metabolic process | biological_process | CRBN,RAB3GAP2,DHX34,EIF2B4,MYO1D,RALGAPA2,RAF1,SEPT5,TAZ,ATP2B1,PLCD1,RAB34,BCL6,CMPK2,GBP3,PLD1,VAPB,GPAA1,PGS1,SMPD4,MCF2L,ARHGEF12,ATP6V1D,H6PD,PNKP,ARHGEF25,RGL4,STARD13,FDPS,ABCC1,DDX23,DNAJC10,RAB35,RANBP1,SIPA1L1,DDX39A,KRIT1,SKIV2L,MINK1,RHOF,EEF1A1,DHX9,PIGS,PNPO,PDE7B,TBC1D2B,DNM1L,UPF1,FDXR,PIGG,PDXK,HERC2,CHD6,TBC1D10B,SEPT4,EFTUD2,CNP,CLN8,PIGN,TBC1D14,TNK2,GIT2,MTG1,RAB18,NADSYN1,PMS1,ADCY4,PDE4D,PLEKHG4,CHKB,NADK,IDI1,FAM13A,INO80,GPAT2,RALGPS2,PLEKHG5,DDX58,SNX13,NF1,RTKN,NPR1,G3BP1,RAB31,ADSL,PKD2,GALT,GNAI1,PAFAH1B1,ISYNA1,GPCPD1,PDE8A,DDX6,ACAP2,RGS3,GARS,CYTH2,HEXA,PLD6,FLCN,FMO2,GMDS,ARHGAP9,MTMR14,PTEN,IDH1,IQGAP1,CTNS,SRGAP2,ATP11B,DDX41,RNF213,ABCA2,DENND4C,MAP4K4,ITPA,PSMC6,TBCD,IMPDH1,SKIV2L2,PSMC4,ARHGAP29,SGSM3,GOPC,RHEB,SEMA4D,GNB3,CSF1R,GRPEL2,TBC1D22A,DTYMK,MBOAT2,RAB5A,ATP5A1,TMED2,RASGRF2,AK5,ATP8B2,ARHGEF7,ASAP1,REXO2,IDH3B,RGS2,LPCAT1,PDGFRB,RAD51B,FARP1,RAP1B,SMARCA4,DHX40,DOCK8,LONRF3,GSK3A,PCYT1A,PIGO,PPAP2A,MYO1E,GPHN,PGM2,RGL2,CHD2,LONP2,ACIN1,PSD3,BNIP2,NTRK1,UCK1,DHX37,RAPGEF6,ALG9,PANK3,SMARCAD1,DENND6B,PLA2G16 | 1.200941626 | 4.81E-03 |
| GO:0051604 | protein maturation | biological_process | CPE,GLG1,ADAM8,C2,CFB,DISP1,MDM2,RHBDD1,FKBP1A,SERPINH1,CASP2,IFT172,CTSH,C3,GLI3,PCSK7,LONP2,LMF1,SPCS3,C2CD3 | 1.871198957 | 4.83E-03 |
| GO:0017016 | Ras GTPase binding | molecular_function | RAF1,GAS8,SYTL4,RANBP1,PRKCH,RTKN,SYTL2,BICD1,DAAM1,IQGAP1,SRGAP2,RAB8A,SGSM3,RANBP9,ERC1,FLNA,RAP1B,RAPGEF6 | 1.94497385 | 4.85E-03 |
| GO:0019901 | protein kinase binding | molecular_function | UTRN,RAF1,PAM,PDLIM5,PTPN6,EEF1A1,IGBP1,PRKACA,PLK1,CCNL1,FAM58A,TBC1D14,STK11IP,TPCN2,CCNL2,PTPRK,NPR1,MAPK8IP3,PTEN,IQGAP1,IKBKB,PXN,MEF2A,PARN,PRKRIP1,RAB8A,CDK5RAP2,PTPRC,PAK1,RHEB,FLNA,ARHGEF7,RAD54L2,KIF13B,GSK3A,CDK5RAP1,SPRED1,PKD1,PDPK1,USF1,CDK5RAP3 | 1.517198019 | 4.89E-03 |
| GO:0042175 | nuclear outer membrane-endoplasmic reticulum membrane network | cellular_component | HLA-DPB1,MARCH5,UBXN1,PLD1,VAPB,GPAA1,SMPD4,VRK2,DERL2,IL15RA,HLA-C,XYLT1,HSD17B12,HLA-DQA1,MPDU1,MARCH6,PIGS,LMAN2,PIGG,SHISA5,NUP210,CLN8,PIGN,VAMP7,CAMK2D,SGK1,CYP2R1,SEC31A,RHBDD1,FKBP1A,SRP9,RHBDF1,EMC3,ALG6,PKD2,EDEM2,SYNE1,FMO2,HERPUD1,TMEM189,NECAB3,CLSTN2,HLA-F,TMEM66,STX18,EMC4,RAB10,OS9,ELOVL1,TMED3,SLC39A7,MBOAT2,AUP1,TMED2,RASGRF2,SCFD1,NOX4,EXT1,PDIA5,LPCAT1,EBPL,MAN1B1,CANX,LRPPRC,YIF1A,RHBDF2,PAPPA-AS1,PCYT1A,PIGO,PTGIS,AMFR,LMF1,SEC31B,PLOD2,SPCS3,ALG9 | 1.342794079 | 5.03E-03 |
| GO:0048813 | dendrite morphogenesis | biological_process | SIPA1L1,MINK1,PDLIM5,ACTR3,SLC11A2,CAPRIN1,PTEN,FYN,MEF2A,SEMA4D,PTPRD,FARP1 | 2.309594142 | 5.06E-03 |
| GO:0044322 | endoplasmic reticulum quality control compartment | cellular_component | RHBDD1,MAN1B1 | 13.99332777 | 5.10E-03 |
| GO:0032044 | DSIF complex | cellular_component | SUPT5H,SUPT4H1 | 13.99332777 | 5.10E-03 |
| GO:0072563 | endothelial microparticle | cellular_component | ANXA5,ENG | 13.99332777 | 5.10E-03 |
| GO:0002133 | polycystin complex | cellular_component | PKD2,PKD1 | 13.99332777 | 5.10E-03 |
| GO:0032116 | SMC loading complex | cellular_component | NIPBL,MAU2 | 13.99332777 | 5.10E-03 |
| GO:0005965 | protein farnesyltransferase complex | cellular_component | FNTB,CHURC1-FNTB | 13.99332777 | 5.10E-03 |
| GO:0030030 | cell projection organization | biological_process | FZD6,CLMN,IGF1R,LAMB1,NPHP3,RAF1,COL9A1,BDNF,COL2A1,ARHGEF12,CD72,TTLL3,ITGA9,UHMK1,CAPZB,SIPA1L1,MINK1,PDLIM5,ACTR3,LHX4,VASP,CSNK2A1,SLC11A2,CNP,BBS1,FGFR1,CAPRIN1,KIAA0586,SSH2,CREB1,NPTN,RGMB,RPS6KA5,RB1,MAPK8IP3,BLOC1S5,PAFAH1B1,USP33,NRP1,PTEN,FYN,IFT172,PXN,SRGAP2,MEF2A,TCTN1,CACNB1,MYCBP2,MYLK,RAB8A,COL9A3,PTPRC,FLOT1,RANBP9,WDR35,PAK1,NCK2,RAB10,SEMA6A,SEMA4D,CSF1R,ROBO3,EZR,FLNA,RAB5A,GLI3,EXT1,STK36,ARHGEF7,TBCE,ASAP1,UNC5B,NUP85,PTPRD,ITGA5,DZIP1,CC2D2A,FARP1,KIF13B,PTPN23,TLN1,TROVE2,ROBO2,CACNB3,PMP22,NTRK1,TMEM237,SEPT2,STK24,SSH1,C2CD3,CLASP1 | 1.300610902 | 5.17E-03 |
| GO:0042176 | regulation of protein catabolic process | biological_process | UBXN1,SMAD7,HGS,RAD23A,ADAM8,CSNK2A1,PRKACA,PLK1,WAC,MDM2,RHBDD1,RHBDF1,NUB1,PTEN,FYN,FBXW7,SGSM3,SMAD4,FLNA,LPCAT1,GSK3A,CSNK1E | 1.796350999 | 5.29E-03 |
| GO:0051128 | regulation of cellular component organization | biological_process | CRBN,NOC2L,RAF1,CDK13,BDNF,MARCH5,DPP4,BCL6,SMAD7,HDAC6,DERL2,ARPC4-TTLL3,LEF1,PAX8,BCL2L11,PAM,USP47,CAPZB,PRPF40A,RANBP1,SIPA1L1,PDLIM5,ACTR3,CSNK2A1,PRKACA,ANAPC4,PLK1,DNM1L,UPF1,VAMP7,BCLAF1,CAMK2D,TBC1D14,TNK2,TRO,FGFR1,CAPRIN1,SNCAIP,SGK1,TCHP,PRKCH,PPM1F,INO80,SSH2,NPTN,NPR1,RPS6KA5,NIPBL,NOL8,RB1,PRMT5,LTBP4,NEXN,PAFAH1B1,ARPC2,STK38L,BICD1,NR1H3,PLK2,FLCN,NRP1,IGFBP6,FAP,PTEN,FYN,PHPT1,SNX17,NCOR1,MEF2A,WASH4P,VILL,MAPK8,MYCBP2,N6AMT1,CSK,CDK5RAP2,TBCD,WDR61,AAK1,PAK1,NCK2,ACD,SEMA4D,CSF1R,ACTR2,C3,SMAD4,TGFB1I1,EZR,GOLPH3,FHOD1,RAB5A,NOX4,ERCC1,PHF1,PTPRD,PDGFRB,CDK11A,SMARCA4,KIF13B,GSK3A,NLGN2,TWF1,IGF2,CRIPAK,ROBO2,PMP22,CLIC4,NTRK1,BRWD1,TGFBR3,PHF19,SENP6,PDPK1,TSG101,STK24,SSH1,UBR5,CLASP1,GATA2 | 1.252297366 | 5.29E-03 |
| GO:0031323 | regulation of cellular metabolic process | biological_process | FZD6,USP10,OBFC1,RAB3GAP2,PBX2,KANK2,ACADVL,EIF2B4,RAI1,PSMB10,IGF1R,TNRC6A,MYO1D,SIRT2,RALGAPA2,MYNN,TRNAU1AP,NOC2L,RAF1,ZNF131,RSC1A1,SFSWAP,CDK13,SIN3B,CBX5,SUPT5H,SUPT20H,UBXN1,BCL6,FUBP1,ZNF783,TBX2,MMS19,ZFP91,CNTF,EEF2K,VAPB,CUX1,EED,FMR1,SMAD7,MCF2L,USP4,HDAC6,ARHGEF12,EHMT1,ZNF496,LANCL2,LEF1,PAX8,SUPT4H1,ZNF83,PSMB9,EMX2,RBPMS,STARD13,ZSCAN31,XBP1,PAM,SNRNP70,RAD23A,APITD1,UHMK1,USP47,ADAM8,GABPB1,DNAJC10,PCGF6,RANBP1,SIPA1L1,PTPN6,EEF1A1,LHX4,CSNK2A1,IGBP1,UPF3A,NOD1,PRKACA,STAT2,ANAPC4,PLK1,ZNF446,ASNS,TBC1D2B,PTGES2,UPF1,ZNF621,HDGF,NPC1,CCNL1,CHD6,ZC3H12A,TBC1D10B,SEPT4,SYMPK,FAM58A,ATG4B,CLN8,TBX18,LBX2,PCGF1,DR1,BCLAF1,ZNF721,ZNF397,JHDM1D,ZNF710,GIGYF2,TBC1D14,TNK2,GIT2,WAC,STK4,ZNF142,FUBP3,ZNF540,FGFR1,HSF4,PAIP1,CAPRIN1,ADCY4,CELF1,PAF1,TAB2,SGK1,DPF2,CPT1B,RNF8,SEC31A,MDM2,FKBP1A,PRKCH,PPM1F,ZNF595,TBP,YY1,FAM13A,INO80,GMEB2,PFDN5,CREB1,NPTN,SRP9,FLII,RPRD1A,DDX58,ZCCHC9,CCNL2,PTPRK,SNX13,RHBDF1,NF1,ZEB1,EIF4B,NUB1,IFITM3,ASCC2,RGMB,EBF1,MED28,NPR1,ZNF3,RPS6KA5,NIPBL,BRD9,ZNF837,PKD2,RXRB,LMNA,MITF,RB1,PRMT5,MAPK8IP3,MZF1,ZFPM2,TP53BP1,RNF168,PAFAH1B1,ZNF865,SENP2,IL18,PUM2,TPP1,SYTL2,SUB1,CHMP1A,PDE8A,ACAP2,ZNF558,SH3BP5,ZNF263,ZNF180,BICD1,ZNF276,RGS3,NR1H3,GRB10,USP7,FLCN,NRP1,ZNF605,ZNF410,ARHGAP9,SAP30BP,MAST2,VPS72,PTEN,SRPK1,RUNX2,IQGAP1,FBXW7,SMARCD3,HERPUD1,IKBKB,RQCD1,PXN,SRGAP2,RFX7,NCOR1,MEF2A,FECH,PRKRIP1,SETD8,SMEK1,NECAB3,PIAS2,MAPK8,MYCBP2,USP15,DDX41,PBX3,ZNF565,ABCA2,AFF4,TRIM28,DMTF1,CSK,CDK5RAP2,PTPRC,OAZ1,PSMC6,TBCD,UBP1,WDR61,EBF4,ZNF148,ZNF76,PSMC4,ARHGAP29,SGSM3,STAG2,SP110,PHKG2,PAK1,NCK2,TCF4,ACD,IKZF5,HMGN2,SEMA4D,SSBP2,CSF1R,ERC1,C3,NFYC,PIWIL4,SRSF10,SS18,RCOR3,SMAD4,CHURC1,CHURC1-FNTB,TBC1D22A,ZNF114,MIER2,C1QTNF3,TGFB1I1,DDAH1,INO80E,ZNF44,CREBZF,ING4,CD276,ZNF687,CDC14B,CLK3,NR2C2,FHOD1,DNTTIP2,FLNA,IRF9,GLI3,TMED2,MAPK12,CCDC59,DCAF6,AK5,ENG,SIRT7,ZSCAN5A,TCF12,ARNT,NOX4,ZNF692,GAPDH,ERCC1,PHF1,NRBP2,STK36,WWP1,ARHGEF7,PHF12,PDIA5,ASAP1,MED6,MDFI,CIRBP,ZNF554,CIZ1,ITGA5,RGS2,HINFP,NCBP2,LPCAT1,MLX,PDGFRB,TGS1,CDK11A,GLIS3,ELP6,CARD14,BDP1,FARP1,TNFRSF14,RUNX1,MKNK2,SMARCA4,NAA16,LRPPRC,YIF1A,RAD54L2,ZNF518B,CLK4,ZNF90,ZNF638,PER3,TLN1,GSK3A,ZNF383,NCOR2,SETD2,TWF1,IGF2,PTGIS,ATXN3,PSTK,PHF21A,PDCD4,SOX13,CHD2,CRIPAK,LONP2,PSMA1,STAT6,CSNK1E,SON,ZNF138,ZNF705A,CDK5RAP1,BNIP2,NTRK1,TFAM,SPRED1,TNFRSF10B,BRWD1,SMAD9,HBB,LMF1,DUSP6,TGFBR3,ZBTB16,BAZ2A,RRP8,VARS,LARS,PHF19,LMCD1,PKD1,PDPK1,TSG101,USF1,FOXC1,KPNA1,DDAH2,SSH1,CDK5RAP3,RAPGEF6,PABPC1,UBR5,FASTK,EYA2,SMARCAD1,WNK1,CC2D1A,GATA2 | 1.10835185 | 5.31E-03 |
| GO:0043130 | ubiquitin binding | molecular_function | SIRT2,UBXN1,HDAC6,RAD23A,MARK4,TAB2,SHARPIN,RNF168,USP33,TSG101,UBR5 | 2.396361151 | 5.36E-03 |
| GO:0004798 | thymidylate kinase activity | molecular_function | CMPK2,DTYMK | 13.50676285 | 5.48E-03 |
| GO:0047522 | 15-oxoprostaglandin 13-oxidase activity | molecular_function | PTGR2,PTGR1 | 13.50676285 | 5.48E-03 |
| GO:0090302 | mitotic anaphase-promoting complex activity | molecular_function | PLK1,PTEN | 13.50676285 | 5.48E-03 |
| GO:0036132 | 13-prostaglandin reductase activity | molecular_function | PTGR2,PTGR1 | 13.50676285 | 5.48E-03 |
| GO:0016403 | dimethylargininase activity | molecular_function | DDAH1,DDAH2 | 13.50676285 | 5.48E-03 |
| GO:0042903 | tubulin deacetylase activity | molecular_function | SIRT2,HDAC6 | 13.50676285 | 5.48E-03 |
| GO:0097033 | mitochondrial respiratory chain complex III biogenesis | biological_process | TTC19,BCS1L | 13.47263249 | 5.50E-03 |
| GO:0042822 | pyridoxal phosphate metabolic process | biological_process | PNPO,PDXK | 13.47263249 | 5.50E-03 |
| GO:0042823 | pyridoxal phosphate biosynthetic process | biological_process | PNPO,PDXK | 13.47263249 | 5.50E-03 |
| GO:2000254 | regulation of male germ cell proliferation | biological_process | RHBDD1,IL18 | 13.47263249 | 5.50E-03 |
| GO:0046072 | dTDP metabolic process | biological_process | CMPK2,DTYMK | 13.47263249 | 5.50E-03 |
| GO:0017062 | respiratory chain complex III assembly | biological_process | TTC19,BCS1L | 13.47263249 | 5.50E-03 |
| GO:0006258 | UDP-glucose catabolic process | biological_process | GALT,GSK3A | 13.47263249 | 5.50E-03 |
| GO:0006233 | dTDP biosynthetic process | biological_process | CMPK2,DTYMK | 13.47263249 | 5.50E-03 |
| GO:0007092 | activation of mitotic anaphase-promoting complex activity | biological_process | PLK1,PTEN | 13.47263249 | 5.50E-03 |
| GO:0000088 | mitotic prophase | biological_process | PLK1,GORASP1 | 13.47263249 | 5.50E-03 |
| GO:0034551 | mitochondrial respiratory chain complex III assembly | biological_process | TTC19,BCS1L | 13.47263249 | 5.50E-03 |
| GO:0046128 | purine ribonucleoside metabolic process | biological_process | CRBN,RAB3GAP2,DHX34,EIF2B4,MYO1D,RALGAPA2,SEPT5,ATP2B1,RAB34,BCL6,GBP3,MCF2L,ARHGEF12,ATP6V1D,ARHGEF25,RGL4,STARD13,ABCC1,DDX23,DNAJC10,RAB35,RANBP1,SIPA1L1,DDX39A,KRIT1,SKIV2L,MINK1,RHOF,EEF1A1,DHX9,TBC1D2B,DNM1L,UPF1,HERC2,CHD6,TBC1D10B,SEPT4,EFTUD2,TBC1D14,TNK2,GIT2,MTG1,RAB18,PMS1,PLEKHG4,NADK,FAM13A,INO80,RALGPS2,PLEKHG5,DDX58,SNX13,NF1,RTKN,G3BP1,RAB31,ADSL,GNAI1,PAFAH1B1,DDX6,ACAP2,RGS3,CYTH2,FLCN,ARHGAP9,IQGAP1,CTNS,SRGAP2,ATP11B,DDX41,RNF213,ABCA2,DENND4C,MAP4K4,PSMC6,TBCD,IMPDH1,SKIV2L2,PSMC4,ARHGAP29,SGSM3,GOPC,RHEB,SEMA4D,GNB3,GRPEL2,TBC1D22A,RAB5A,ATP5A1,TMED2,RASGRF2,AK5,ATP8B2,ARHGEF7,ASAP1,RGS2,RAD51B,FARP1,RAP1B,SMARCA4,DHX40,DOCK8,LONRF3,MYO1E,RGL2,CHD2,LONP2,ACIN1,PSD3,BNIP2,NTRK1,DHX37,RAPGEF6,MTO1,PANK3,DENND6B | 1.25629049 | 5.51E-03 |
| GO:0022607 | cellular component assembly | biological_process | CRBN,CADM1,IGF1R,RAF1,F11R,SFSWAP,BDNF,TAZ,SART1,RAB34,MMS19,SHMT2,GPAA1,CLNS1A,NUP98,SMAD7,HDAC6,TTLL3,ARPC4-TTLL3,GLS,BCL2L11,STARD9,COG4,PAM,DDX23,CAPZB,CD9,PDLIM5,ACTR3,VASP,NOD1,PRKACA,TTC19,DNM1L,RC3H1,PPP5C,ATG4B,BCLAF1,BBS1,TBC1D14,HSF4,DISP1,CELF1,SNCAIP,SF3A2,SHARPIN,MDM2,FKBP1A,PRKCH,PPM1F,TLN2,INO80,SSH2,PTPRK,MAGI1,PIH1D1,ATG12,ADSL,MITF,RB1,PRMT5,PUM2,ARPC2,DDX6,BICD1,PLD6,FLCN,PTEN,IFT172,PXN,SRGAP2,NCOR1,TNS1,FECH,ERAL1,WASH4P,VILL,MYLK,RAB8A,TRIM28,TBCD,TSPAN4,COX14,ZNF148,GOPC,RANBP9,WDR35,ATPAF2,PARD6G,PAK1,NCK2,TCF4,ACD,ACTR2,SRSF10,SMAD4,C1QTNF3,EZR,CENPT,FHOD1,FLNA,RAB5A,HGSNAT,BCS1L,TMED2,NOX4,STK36,ARHGEF7,CIRBP,NUP85,NUBP1,HAUS5,PTPRD,ITGA5,NCBP2,TGS1,DZIP1,CC2D2A,FARP1,KCTD2,TLN1,SNRPE,NLGN2,TWF1,AMFR,ROBO2,KCTD17,TFAM,SHPRH,ATG3,HBB,TGFBR3,TMEM237,LIMS2,CD151,BAZ2A,SEPT2,UQCRH,SENP6,PDPK1,SSH1,FMOD,C2CD3,SMARCAD1 | 1.222469489 | 5.56E-03 |
| GO:0006412 | translation | biological_process | EIF2B4,TNRC6A,TRNAU1AP,TARS,EEF2K,FMR1,NARS,UHMK1,EEF1A1,UPF3A,UPF1,GIGYF2,RARS,ZNF540,PAIP1,CAPRIN1,CELF1,RNF8,SRP9,RPL27,EIF4B,RPL9,RSL1D1,RNF168,PUM2,GARS,MRPS7,RPL24,RPL37A,FECH,FARSA,PPA2,NCK2,PIWIL4,RPL4,EIF3M,MRPL49,GAPDH,MTRF1L,TBCE,CIRBP,RGS2,NCBP2,MKNK2,RPLP0,MRPL3,PSTK,CARS2,SPCS3,EIF3I,VARS,LARS,PABPC1 | 1.425248547 | 5.61E-03 |
| GO:0044281 | small molecule metabolic process | biological_process | CRBN,RAB3GAP2,DHX34,ACADVL,EIF2B4,PSMB10,CKB,GK5,PTS,MYO1D,EPHX2,RALGAPA2,TARS,RAF1,SEPT5,SLC16A3,TAZ,SIN3B,ATP2B1,RAB34,ST3GAL1,BCL6,CMPK2,ENOSF1,GBP3,SHMT2,PLD1,VAPB,PGS1,NUP98,AMT,SMPD4,MCF2L,ARHGEF12,ATP6V1D,NARS,H6PD,PNKP,GLS,PAX8,PSMB9,ARHGEF25,RGL4,XYLT1,STARD13,FDPS,PAM,ABCC1,HSD17B12,DDX23,DNAJC10,RAB35,RANBP1,SIPA1L1,DDX39A,KRIT1,SKIV2L,MINK1,RHOF,EEF1A1,PRKACA,RPP14,DHX9,PNPO,PDE7B,ASNS,TBC1D2B,DNM1L,TXNL1,PTGES2,UPF1,FDXR,PDXK,NPC1,HERC2,CHD6,NUP210,TBC1D10B,SEPT4,EFTUD2,CNP,CLN8,GCDH,SLC16A1,TBC1D14,TNK2,GIT2,MTG1,RARS,ALDH18A1,RAB18,ERH,NADSYN1,PMS1,ADCY4,SNCAIP,PDE4D,PLEKHG4,CPT1B,CHKB,NADK,IDI1,CYP2R1,IDH3G,FAM13A,INO80,GPAT2,RALGPS2,NAGK,PLEKHG5,QSOX1,DDX58,ALDH6A1,SNX13,NF1,ACAA1,RTKN,NPR1,G3BP1,RAB31,ADSL,ST3GAL4,PKD2,GALT,GNAI1,TXNDC5,PAFAH1B1,ISYNA1,GPCPD1,STARD3,PDE8A,AACS,DDX6,ACAP2,RGS3,NR1H3,GARS,CYTH2,HEXA,PLD6,FLCN,PTGR2,FMO2,GMDS,ARHGAP9,UST,MTMR14,PTEN,ALDH1A3,IDH1,IQGAP1,LGMN,SMARCD3,CTNS,SNX17,SRGAP2,NCOR1,ATP11B,OXCT1,FECH,COX7A2L,SMEK1,DDX41,RNF213,ABCA2,DENND4C,MAP4K4,ITPA,OAZ1,PSMC6,TBCD,IMPDH1,SKIV2L2,NUP37,FARSA,PSMC4,ARHGAP29,SGSM3,GOPC,PPA2,PHKG2,LEPR,RHEB,SEMA4D,GNB3,C3,ALDH3B1,P4HB,HSD17B4,ELOVL1,GRPEL2,TBC1D22A,C1QTNF3,DDAH1,DTYMK,MTRR,MBOAT2,SLC23A2,DLST,RAB5A,CA5B,HGSNAT,ATP5A1,TMED2,THNSL2,NDUFV1,NDUFS2,RASGRF2,AK5,GUSB,B4GALT4,NOX4,ETFA,EXT1,GAPDH,B3GAT3,SLC25A6,SDHA,ATP8B2,ARHGEF7,PDIA5,ASAP1,REXO2,NUP85,IDH3B,PTGR1,RGS2,LPCAT1,MLX,EBPL,TGS1,RAD51B,FARP1,RAP1B,SMARCA4,DHX40,DOCK8,LONRF3,GSK3A,NCOR2,FPGS,PCYT1A,PPAP2A,PDIA3,PTGIS,MYO1E,D2HGDH,GPHN,PGM2,RGL2,CHD2,LONP2,PSMA1,CARS2,ACIN1,PSD3,BNIP2,NTRK1,PHKG1,HBB,LMF1,UCK1,SPCS3,VARS,LARS,DHX37,UQCRH,DDAH2,ACAN,RAPGEF6,FMOD,MTO1,PANK3,SMARCAD1,DENND6B,PLA2G16 | 1.143433754 | 5.62E-03 |
| GO:0046130 | purine ribonucleoside catabolic process | biological_process | CRBN,RAB3GAP2,DHX34,EIF2B4,MYO1D,RALGAPA2,SEPT5,ATP2B1,RAB34,BCL6,GBP3,MCF2L,ARHGEF12,ATP6V1D,ARHGEF25,RGL4,STARD13,ABCC1,DDX23,DNAJC10,RAB35,RANBP1,SIPA1L1,DDX39A,KRIT1,SKIV2L,MINK1,RHOF,EEF1A1,DHX9,TBC1D2B,DNM1L,UPF1,HERC2,CHD6,TBC1D10B,SEPT4,EFTUD2,TBC1D14,TNK2,GIT2,MTG1,RAB18,PMS1,PLEKHG4,FAM13A,INO80,RALGPS2,PLEKHG5,DDX58,SNX13,NF1,RTKN,G3BP1,RAB31,GNAI1,PAFAH1B1,DDX6,ACAP2,RGS3,CYTH2,ARHGAP9,IQGAP1,SRGAP2,ATP11B,DDX41,RNF213,ABCA2,DENND4C,MAP4K4,PSMC6,TBCD,SKIV2L2,PSMC4,ARHGAP29,SGSM3,GOPC,RHEB,SEMA4D,GNB3,GRPEL2,TBC1D22A,RAB5A,ATP5A1,TMED2,RASGRF2,ATP8B2,ARHGEF7,ASAP1,RGS2,RAD51B,FARP1,RAP1B,SMARCA4,DHX40,DOCK8,LONRF3,MYO1E,RGL2,CHD2,LONP2,ACIN1,PSD3,BNIP2,NTRK1,DHX37,RAPGEF6,DENND6B | 1.265255921 | 5.92E-03 |
| GO:0006152 | purine nucleoside catabolic process | biological_process | CRBN,RAB3GAP2,DHX34,EIF2B4,MYO1D,RALGAPA2,SEPT5,ATP2B1,RAB34,BCL6,GBP3,MCF2L,ARHGEF12,ATP6V1D,ARHGEF25,RGL4,STARD13,ABCC1,DDX23,DNAJC10,RAB35,RANBP1,SIPA1L1,DDX39A,KRIT1,SKIV2L,MINK1,RHOF,EEF1A1,DHX9,TBC1D2B,DNM1L,UPF1,HERC2,CHD6,TBC1D10B,SEPT4,EFTUD2,TBC1D14,TNK2,GIT2,MTG1,RAB18,PMS1,PLEKHG4,FAM13A,INO80,RALGPS2,PLEKHG5,DDX58,SNX13,NF1,RTKN,G3BP1,RAB31,GNAI1,PAFAH1B1,DDX6,ACAP2,RGS3,CYTH2,ARHGAP9,IQGAP1,SRGAP2,ATP11B,DDX41,RNF213,ABCA2,DENND4C,MAP4K4,PSMC6,TBCD,SKIV2L2,PSMC4,ARHGAP29,SGSM3,GOPC,RHEB,SEMA4D,GNB3,GRPEL2,TBC1D22A,RAB5A,ATP5A1,TMED2,RASGRF2,ATP8B2,ARHGEF7,ASAP1,RGS2,RAD51B,FARP1,RAP1B,SMARCA4,DHX40,DOCK8,LONRF3,MYO1E,RGL2,CHD2,LONP2,ACIN1,PSD3,BNIP2,NTRK1,DHX37,RAPGEF6,DENND6B | 1.265255921 | 5.92E-03 |
| GO:0042278 | purine nucleoside metabolic process | biological_process | CRBN,RAB3GAP2,DHX34,EIF2B4,MYO1D,RALGAPA2,SEPT5,ATP2B1,RAB34,BCL6,GBP3,MCF2L,ARHGEF12,ATP6V1D,ARHGEF25,RGL4,STARD13,ABCC1,DDX23,DNAJC10,RAB35,RANBP1,SIPA1L1,DDX39A,KRIT1,SKIV2L,MINK1,RHOF,EEF1A1,DHX9,TBC1D2B,DNM1L,UPF1,HERC2,CHD6,TBC1D10B,SEPT4,EFTUD2,TBC1D14,TNK2,GIT2,MTG1,RAB18,PMS1,PLEKHG4,NADK,FAM13A,INO80,RALGPS2,PLEKHG5,DDX58,SNX13,NF1,RTKN,G3BP1,RAB31,ADSL,GNAI1,PAFAH1B1,DDX6,ACAP2,RGS3,CYTH2,FLCN,ARHGAP9,IQGAP1,CTNS,SRGAP2,ATP11B,DDX41,RNF213,ABCA2,DENND4C,MAP4K4,PSMC6,TBCD,IMPDH1,SKIV2L2,PSMC4,ARHGAP29,SGSM3,GOPC,RHEB,SEMA4D,GNB3,GRPEL2,TBC1D22A,RAB5A,ATP5A1,TMED2,RASGRF2,AK5,ATP8B2,ARHGEF7,ASAP1,RGS2,RAD51B,FARP1,RAP1B,SMARCA4,DHX40,DOCK8,LONRF3,MYO1E,RGL2,CHD2,LONP2,ACIN1,PSD3,BNIP2,NTRK1,DHX37,RAPGEF6,MTO1,PANK3,DENND6B | 1.253268139 | 5.93E-03 |
| GO:0071482 | cellular response to light stimulus | biological_process | NOC2L,USP47,MDM2,RHBDD1,YY1,INO80,PTPRK,CRIP1,FBXW7 | 2.635949836 | 5.99E-03 |
| GO:0018193 | peptidyl-amino acid modification | biological_process | NOC2L,PPIL2,RAF1,CNTF,SMAD7,HDAC6,EHMT1,LEF1,UHMK1,PTPN6,PRKACA,PLK1,DR1,CAMK2D,TNK2,STK4,FGFR1,SEC31A,MDM2,FKBP1A,PPM1F,MCFD2,PHF15,FKBP10,RPS6KA5,ALG6,ST3GAL4,PRMT5,EDEM2,GALNT2,NTMT1,FLCN,NRP1,FYN,FBXW7,PXN,SETD8,MAPK8,MAN1A2,PTPRC,AGBL5,WDR61,PAK1,SEMA4D,CSF1R,P4HB,ING4,CLK3,MSL1,MGAT5,MAPK12,B4GALT4,GAPDH,ITGA5,MAN2A2,PDGFRB,MAN1B1,TNFRSF14,CANX,SMARCA4,CLK4,TTLL11,SETD2,KANSL3,PDIA3,IGF2,SPRED1,SIRT3,PKD1,PDPK1,ALG9,GATA2 | 1.343531218 | 6.03E-03 |
| GO:0005783 | endoplasmic reticulum | cellular_component | MYO1D,LEPRE1,COL9A1,COL2A1,HLA-DPB1,MARCH5,UBXN1,PLD1,VAPB,GPAA1,PGS1,SMPD4,VRK2,DERL2,IL15RA,H6PD,HLA-C,XYLT1,HSD17B12,HLA-DQA1,MPDU1,DNAJC10,MARCH6,PIGS,LMAN2,COL16A1,PIGG,NPC1,SHISA5,NUP210,CLN8,PIGN,VAMP7,CAMK2D,PLCB4,COL14A1,RNASET2,SGK1,CYP2R1,SEC31A,RHBDD1,COL12A1,FKBP1A,MCFD2,SRP9,RHBDF1,SERPINH1,EMC3,COL18A1,FKBP10,ALG6,PKD2,MAPK8IP3,DHRS1,TXNDC5,EDEM2,FAM172A,FMO2,SRPK1,FBXW7,HERPUD1,ATP11B,TMEM189,NECAB3,CLSTN2,CACNB1,DDX41,OSBPL3,HLA-F,ZFAND2B,COL9A3,TMEM66,STX18,EMC4,NCK2,RAB10,OS9,P4HB,ELOVL1,TMED3,SLC39A7,MBOAT2,AUP1,LRPAP1,TMED2,RASGRF2,SCFD1,NOX4,EXT1,PDIA5,LPCAT1,COL8A1,EBPL,MAN1B1,CANX,YIF1A,SUMF2,RHBDF2,PAPPA-AS1,PCYT1A,PIGO,PDIA3,COL13A1,PTGIS,AMFR,CRIPAK,CACNA2D1,LMF1,TGFBR3,SEC31B,PLOD2,KDELC2,SPCS3,PPT2,CES2,ALG9,PLA2G16 | 1.25169675 | 6.10E-03 |
| GO:0005789 | endoplasmic reticulum membrane | cellular_component | HLA-DPB1,MARCH5,UBXN1,PLD1,VAPB,GPAA1,SMPD4,VRK2,DERL2,IL15RA,HLA-C,XYLT1,HSD17B12,HLA-DQA1,MPDU1,MARCH6,PIGS,LMAN2,PIGG,SHISA5,NUP210,CLN8,PIGN,VAMP7,CAMK2D,SGK1,CYP2R1,SEC31A,RHBDD1,FKBP1A,SRP9,RHBDF1,EMC3,ALG6,PKD2,EDEM2,FMO2,HERPUD1,TMEM189,NECAB3,CLSTN2,HLA-F,TMEM66,STX18,EMC4,RAB10,OS9,ELOVL1,TMED3,SLC39A7,MBOAT2,AUP1,TMED2,RASGRF2,SCFD1,NOX4,EXT1,PDIA5,LPCAT1,EBPL,MAN1B1,CANX,YIF1A,RHBDF2,PAPPA-AS1,PCYT1A,PIGO,PTGIS,AMFR,LMF1,SEC31B,PLOD2,SPCS3,ALG9 | 1.337863379 | 6.11E-03 |
| GO:0007409 | axonogenesis | biological_process | FZD6,IGF1R,LAMB1,RAF1,COL9A1,BDNF,COL2A1,ARHGEF12,CD72,ITGA9,SIPA1L1,LHX4,VASP,CSNK2A1,CNP,FGFR1,SSH2,CREB1,RGMB,RPS6KA5,MAPK8IP3,PAFAH1B1,USP33,NRP1,PTEN,FYN,SRGAP2,TCTN1,CACNB1,MYCBP2,RAB8A,COL9A3,PTPRC,FLOT1,RANBP9,PAK1,NCK2,RAB10,SEMA6A,SEMA4D,ROBO3,EZR,GLI3,EXT1,TBCE,UNC5B,ITGA5,KIF13B,TLN1,ROBO2,CACNB3,NTRK1,STK24,SSH1,CLASP1 | 1.408735337 | 6.12E-03 |
| GO:0030695 | GTPase regulator activity | molecular_function | RAB3GAP2,EIF2B4,RALGAPA2,MCF2L,ARHGEF12,ARHGEF25,RGL4,STARD13,RANBP1,SIPA1L1,KRIT1,MINK1,TBC1D2B,HERC2,TBC1D10B,TBC1D14,TNK2,GIT2,PLEKHG4,FAM13A,RALGPS2,PLEKHG5,NF1,RTKN,ACAP2,RGS3,CYTH2,ARHGAP9,IQGAP1,SRGAP2,DENND4C,MAP4K4,TBCD,ARHGAP29,SGSM3,GOPC,TBC1D22A,RASGRF2,ARHGEF7,ASAP1,RGS2,FARP1,DOCK8,RGL2,PSD3,BNIP2,RAPGEF6,DENND6B | 1.447153162 | 6.12E-03 |
| GO:0000153 | cytoplasmic ubiquitin ligase complex | cellular_component | USP33,OS9,ATG3 | 6.996663887 | 6.18E-03 |
| GO:0031984 | organelle subcompartment | cellular_component | ST3GAL1,FKBP1A,ST3GAL4,GOLGA8B,GOLGA8A,GALNT2,NECAB3,FUT4,TMED3,GOLPH3,TMED2,B4GALT4,SCFD1 | 2.16563406 | 6.42E-03 |
| GO:0045843 | negative regulation of striated muscle tissue development | biological_process | SIRT2,BDNF,LUC7L,LEF1,GSK3A | 3.962538969 | 6.50E-03 |
| GO:1901862 | negative regulation of muscle tissue development | biological_process | SIRT2,BDNF,LUC7L,LEF1,GSK3A | 3.962538969 | 6.50E-03 |
| GO:0031401 | positive regulation of protein modification process | biological_process | ACADVL,PSMB10,IGF1R,RAF1,ZFP91,CNTF,VAPB,SMAD7,PSMB9,RBPMS,XBP1,APITD1,ADAM8,NOD1,PRKACA,ANAPC4,PLK1,ASNS,HDGF,SEPT4,SYMPK,TNK2,STK4,FGFR1,ADCY4,TAB2,SEC31A,FKBP1A,NPTN,RPS6KA5,NIPBL,PKD2,LMNA,MAPK8IP3,SENP2,TPP1,FLCN,NRP1,PTEN,IQGAP1,FBXW7,HERPUD1,PXN,NCOR1,CSK,PTPRC,PSMC6,WDR61,PSMC4,PAK1,SEMA4D,CSF1R,C3,SMAD4,CDC14B,ENG,ARNT,NOX4,PHF1,PDIA5,MDFI,ITGA5,PDGFRB,CARD14,TNFRSF14,YIF1A,TLN1,GSK3A,IGF2,PSMA1,NTRK1,TNFRSF10B,PHF19,PKD1,PDPK1 | 1.329536101 | 6.60E-03 |
| GO:0000387 | spliceosomal snRNP assembly | biological_process | SART1,CLNS1A,PRMT5,SRSF10,NCBP2,TGS1,SNRPE | 3.042207337 | 6.61E-03 |
| GO:0050733 | RS domain binding | molecular_function | LUC7L,SRSF10,SON | 6.753381425 | 6.83E-03 |
| GO:0072284 | metanephric S-shaped body morphogenesis | biological_process | PAX8,PKD2,PDGFRB | 6.736316247 | 6.88E-03 |
| GO:0045990 | carbon catabolite regulation of transcription | biological_process | CHMP1A,RRP8,USF1 | 6.736316247 | 6.88E-03 |
| GO:0042996 | regulation of Golgi to plasma membrane protein transport | biological_process | CSK,GOPC,VAMP4 | 6.736316247 | 6.88E-03 |
| GO:0034086 | maintenance of sister chromatid cohesion | biological_process | NIPBL,RB1,MAU2 | 6.736316247 | 6.88E-03 |
| GO:0050966 | detection of mechanical stimulus involved in sensory perception of pain | biological_process | IL18,FYN,NTRK1 | 6.736316247 | 6.88E-03 |
| GO:0009133 | nucleoside diphosphate biosynthetic process | biological_process | CMPK2,DTYMK,AK5 | 6.736316247 | 6.88E-03 |
| GO:0035520 | monoubiquitinated protein deubiquitination | biological_process | USP47,USP15,ATXN3 | 6.736316247 | 6.88E-03 |
| GO:0034088 | maintenance of mitotic sister chromatid cohesion | biological_process | NIPBL,RB1,MAU2 | 6.736316247 | 6.88E-03 |
| GO:0021523 | somatic motor neuron differentiation | biological_process | LHX4,CLN8,TCTN1 | 6.736316247 | 6.88E-03 |
| GO:0007090 | regulation of S phase of mitotic cell cycle | biological_process | BCL6,PAF1,RB1,CHMP1A,CUL4A,SMARCA4 | 3.368158123 | 6.95E-03 |
| GO:0030199 | collagen fibril organization | biological_process | LEPRE1,COL2A1,COL14A1,COL12A1,SERPINH1,NF1,FOXC1,ACAN | 2.763616922 | 6.98E-03 |
| GO:0032182 | small conjugating protein binding | molecular_function | SIRT2,UBXN1,HDAC6,RAD23A,MARK4,HERC2,TAB2,SHARPIN,RNF168,USP33,TSG101,UBR5 | 2.220289783 | 6.99E-03 |
| GO:0007160 | cell-matrix adhesion | biological_process | UTRN,BCL6,BCL2L11,MINK1,PPM1F,THBS3,PTPRK,NF1,ITGA3,PLEKHA2,ADAM15,PTEN,PXN,CDK6,TRPM7,PPFIA1,ITGA11,COL13A1,PKD1,PDPK1 | 1.808407046 | 7.07E-03 |
| GO:0010498 | proteasomal protein catabolic process | biological_process | CRBN,PSMB10,SIRT2,SPOP,UBXN1,SMAD7,DERL2,PSMB9,RAD23A,DNAJC10,PRKACA,ANAPC4,PLK1,WAC,MDM2,RHBDD1,RHBDF1,NUB1,PTEN,FBXW7,PSMC6,PSMC4,OS9,WWP1,MAN1B1,ATXN3,AMFR,PSMA1,CSNK1E | 1.614489018 | 7.16E-03 |
| GO:0051247 | positive regulation of protein metabolic process | biological_process | ACADVL,PSMB10,IGF1R,RAF1,ZFP91,CNTF,VAPB,SMAD7,PSMB9,RBPMS,XBP1,APITD1,UHMK1,ADAM8,CSNK2A1,UPF3A,NOD1,PRKACA,ANAPC4,PLK1,ASNS,HDGF,SEPT4,SYMPK,TNK2,STK4,FGFR1,PAIP1,ADCY4,TAB2,SEC31A,MDM2,RHBDD1,FKBP1A,NPTN,NUB1,RPS6KA5,NIPBL,PKD2,LMNA,MAPK8IP3,SENP2,TPP1,NR1H3,FLCN,NRP1,PTEN,IQGAP1,FBXW7,HERPUD1,PXN,NCOR1,CSK,PTPRC,PSMC6,WDR61,PSMC4,SGSM3,PAK1,SEMA4D,CSF1R,C3,SMAD4,CD276,CDC14B,ENG,ARNT,NOX4,PHF1,PDIA5,MDFI,CIRBP,ITGA5,LPCAT1,PDGFRB,CARD14,TNFRSF14,YIF1A,TLN1,GSK3A,IGF2,PSMA1,CSNK1E,NTRK1,TNFRSF10B,PHF19,PKD1,PDPK1,PABPC1 | 1.290704297 | 7.21E-03 |
| GO:0051020 | GTPase binding | molecular_function | RAF1,GAS8,MARCH5,SYTL4,RANBP1,PRKCH,RTKN,SYTL2,BICD1,DAAM1,IQGAP1,SRGAP2,RAB8A,SGSM3,RANBP9,GNB3,ERC1,FLNA,RAP1B,RAPGEF6 | 1.800901713 | 7.39E-03 |
| GO:0048468 | cell development | biological_process | FZD6,EIF2B4,CLMN,IGF1R,LAMB1,RAF1,COL9A1,BDNF,COL2A1,BCL6,CNTF,SMAD7,ARHGEF12,CD72,LEF1,PAX8,ITGA9,XBP1,UHMK1,CD9,SIPA1L1,MINK1,PDLIM5,ACTR3,LHX4,VASP,CSNK2A1,PRKACA,SEPT4,SLC11A2,CNP,FGFR1,HSF4,CAPRIN1,CELF1,PDE4D,PAF1,RNF8,PRKCH,SSH2,CREB1,NPTN,NF1,ZEB1,RGMB,COL18A1,MED28,RPS6KA5,NIPBL,LMNA,RB1,MAPK8IP3,BLOC1S5,PAFAH1B1,MTCH1,ARPC2,ADAM15,USP33,HEXA,PLD6,NRP1,VPS72,PTEN,FYN,SRPK1,RUNX2,IQGAP1,SMARCD3,SRGAP2,MEF2A,TCTN1,CACNB1,MYCBP2,PBX3,RAB8A,AFF4,TRIM28,CDK5RAP2,COL9A3,PTPRC,CDK6,FLOT1,STAG2,GOPC,RANBP9,PAK1,NCK2,RAB10,SEMA6A,TCF4,SEMA4D,HSD17B4,ROBO3,SMAD4,TGFB1I1,EZR,FLNA,GLI3,ENG,TCF12,EXT1,ERCC1,TBCE,MED6,UNC5B,PTPRD,ITGA5,PDGFRB,DZIP1,FARP1,RUNX1,SMARCA4,KIF13B,TLN1,GSK3A,SETD2,MYO1E,GPHN,ROBO2,CACNB3,PMP22,CLIC4,CDK5RAP1,BNIP2,NTRK1,TGFBR3,ZBTB16,SEPT2,PDPK1,FOXC1,ACAN,STK24,SSH1,CDK5RAP3,WNK1,CLASP1,TENM4,GATA2 | 1.218363882 | 7.41E-03 |
| GO:0009117 | nucleotide metabolic process | biological_process | CRBN,RAB3GAP2,DHX34,EIF2B4,MYO1D,RALGAPA2,RAF1,SEPT5,ATP2B1,RAB34,BCL6,CMPK2,GBP3,MCF2L,ARHGEF12,ATP6V1D,H6PD,PNKP,ARHGEF25,RGL4,STARD13,ABCC1,DDX23,DNAJC10,RAB35,RANBP1,SIPA1L1,DDX39A,KRIT1,SKIV2L,MINK1,RHOF,EEF1A1,DHX9,PDE7B,TBC1D2B,DNM1L,UPF1,FDXR,HERC2,CHD6,TBC1D10B,SEPT4,EFTUD2,CNP,TBC1D14,TNK2,GIT2,MTG1,RAB18,NADSYN1,PMS1,ADCY4,PDE4D,PLEKHG4,NADK,FAM13A,INO80,RALGPS2,PLEKHG5,DDX58,SNX13,NF1,RTKN,NPR1,G3BP1,RAB31,ADSL,PKD2,GALT,GNAI1,PAFAH1B1,PDE8A,DDX6,ACAP2,RGS3,GARS,CYTH2,FLCN,FMO2,GMDS,ARHGAP9,IDH1,IQGAP1,CTNS,SRGAP2,ATP11B,DDX41,RNF213,ABCA2,DENND4C,MAP4K4,ITPA,PSMC6,TBCD,IMPDH1,SKIV2L2,PSMC4,ARHGAP29,SGSM3,GOPC,RHEB,SEMA4D,GNB3,GRPEL2,TBC1D22A,DTYMK,RAB5A,ATP5A1,TMED2,RASGRF2,AK5,ATP8B2,ARHGEF7,ASAP1,REXO2,IDH3B,RGS2,RAD51B,FARP1,RAP1B,SMARCA4,DHX40,DOCK8,LONRF3,GSK3A,MYO1E,RGL2,CHD2,LONP2,ACIN1,PSD3,BNIP2,NTRK1,UCK1,DHX37,RAPGEF6,PANK3,SMARCAD1,DENND6B | 1.216098355 | 7.46E-03 |
| GO:0034330 | cell junction organization | biological_process | CADM1,F11R,SMAD7,CD9,VASP,PRKACA,PRKCH,PPM1F,TLN2,PTPRK,FLCN,PTEN,PXN,TNS1,CSK,TBCD,PARD6G,CSF1R,FLNA,ITGA5,TLN1,NLGN2,LIMS2,CD151,PDPK1 | 1.675700559 | 7.59E-03 |
| GO:0042454 | ribonucleoside catabolic process | biological_process | CRBN,RAB3GAP2,DHX34,EIF2B4,MYO1D,RALGAPA2,SEPT5,ATP2B1,RAB34,BCL6,GBP3,MCF2L,ARHGEF12,ATP6V1D,ARHGEF25,RGL4,STARD13,ABCC1,DDX23,DNAJC10,RAB35,RANBP1,SIPA1L1,DDX39A,KRIT1,SKIV2L,MINK1,RHOF,EEF1A1,DHX9,TBC1D2B,DNM1L,UPF1,HERC2,CHD6,TBC1D10B,SEPT4,EFTUD2,TBC1D14,TNK2,GIT2,MTG1,RAB18,PMS1,PLEKHG4,FAM13A,INO80,RALGPS2,PLEKHG5,DDX58,SNX13,NF1,RTKN,G3BP1,RAB31,GNAI1,PAFAH1B1,DDX6,ACAP2,RGS3,CYTH2,ARHGAP9,IQGAP1,SRGAP2,ATP11B,DDX41,RNF213,ABCA2,DENND4C,MAP4K4,PSMC6,TBCD,SKIV2L2,PSMC4,ARHGAP29,SGSM3,GOPC,RHEB,SEMA4D,GNB3,GRPEL2,TBC1D22A,RAB5A,ATP5A1,TMED2,RASGRF2,ATP8B2,ARHGEF7,ASAP1,RGS2,RAD51B,FARP1,RAP1B,SMARCA4,DHX40,DOCK8,LONRF3,MYO1E,RGL2,CHD2,LONP2,ACIN1,PSD3,BNIP2,NTRK1,DHX37,RAPGEF6,DENND6B | 1.254348542 | 7.63E-03 |
| GO:0044427 | chromosomal part | cellular_component | OBFC1,CBX5,BCL6,NUP98,EED,DYNC1I1,APITD1,CSNK2A1,PLK1,UPF1,RNF8,TBP,YY1,INO80,CREB1,RB1,USP3,TP53BP1,RNF168,PAFAH1B1,NR1H3,RUNX2,SMARCD3,NCOR1,PPP1R10,MEF2A,TRIM28,DSN1,WDR61,NUP37,STAG2,ACD,HMGN2,INO80E,CENPT,FLNA,SUN2,SIRT7,ERCC1,PHF1,PHF12,NUP85,NCAPD3,SMARCA4,NCOR2,MAU2,STAT6,NSMCE4A,SHPRH,BAZ2A,RRP8,SEPT2,FOXC1,SMARCAD1,CLASP1 | 1.394262731 | 7.63E-03 |
| GO:0009119 | ribonucleoside metabolic process | biological_process | CRBN,RAB3GAP2,DHX34,EIF2B4,MYO1D,RALGAPA2,SEPT5,ATP2B1,RAB34,BCL6,GBP3,MCF2L,ARHGEF12,ATP6V1D,ARHGEF25,RGL4,STARD13,ABCC1,DDX23,DNAJC10,RAB35,RANBP1,SIPA1L1,DDX39A,KRIT1,SKIV2L,MINK1,RHOF,EEF1A1,DHX9,TBC1D2B,DNM1L,UPF1,HERC2,CHD6,TBC1D10B,SEPT4,EFTUD2,TBC1D14,TNK2,GIT2,MTG1,RAB18,PMS1,PLEKHG4,NADK,FAM13A,INO80,RALGPS2,PLEKHG5,DDX58,SNX13,NF1,RTKN,G3BP1,RAB31,ADSL,GNAI1,PAFAH1B1,DDX6,ACAP2,RGS3,CYTH2,FLCN,ARHGAP9,IQGAP1,CTNS,SRGAP2,ATP11B,DDX41,RNF213,ABCA2,DENND4C,MAP4K4,PSMC6,TBCD,IMPDH1,SKIV2L2,PSMC4,ARHGAP29,SGSM3,GOPC,RHEB,SEMA4D,GNB3,GRPEL2,TBC1D22A,RAB5A,ATP5A1,TMED2,RASGRF2,AK5,ATP8B2,ARHGEF7,ASAP1,RGS2,RAD51B,FARP1,RAP1B,SMARCA4,DHX40,DOCK8,LONRF3,MYO1E,RGL2,CHD2,LONP2,ACIN1,PSD3,BNIP2,NTRK1,UCK1,DHX37,RAPGEF6,MTO1,PANK3,DENND6B | 1.241179529 | 7.71E-03 |
| GO:0051172 | negative regulation of nitrogen compound metabolic process | biological_process | KANK2,SIRT2,NOC2L,SFSWAP,SIN3B,CBX5,SUPT5H,BCL6,TBX2,CUX1,EED,SMAD7,HDAC6,EHMT1,ZNF496,LANCL2,LEF1,SUPT4H1,USP47,PCGF6,IGBP1,PLK1,HDGF,ZC3H12A,TBX18,DR1,BCLAF1,ZNF540,FGFR1,HSF4,PAF1,MDM2,PPM1F,YY1,PFDN5,CREB1,PTPRK,ZEB1,IFITM3,RPS6KA5,NIPBL,RB1,PRMT5,ZFPM2,CHMP1A,ZNF263,NR1H3,FLCN,VPS72,RUNX2,FBXW7,NCOR1,MEF2A,SETD8,TRIM28,UBP1,ZNF148,STAG2,TCF4,ACD,SEMA4D,SRSF10,SMAD4,CREBZF,ING4,GLI3,ENG,SIRT7,ERCC1,WWP1,PHF12,MDFI,HINFP,LPCAT1,MLX,GLIS3,SMARCA4,PER3,GSK3A,NCOR2,PTGIS,PHF21A,PDCD4,STAT6,ZBTB16,BAZ2A,RRP8,LMCD1,TSG101,PABPC1,UBR5,CC2D1A,GATA2 | 1.278525328 | 7.85E-03 |
| GO:0048037 | cofactor binding | molecular_function | ACADVL,SIRT2,SHMT2,TYW1B,H6PD,PNPO,ASNS,FDXR,PDXK,GCDH,IDH3G,ALDH6A1,ACBD4,FMO2,GMDS,ALDH1A3,IDH1,MTRR,THNSL2,NDUFV1,NDUFS2,SIRT7,NOX4,ETFA,GAPDH,SDHA,IDH3B,D2HGDH,SIRT3,MTO1 | 1.589030923 | 7.86E-03 |
| GO:0009653 | anatomical structure morphogenesis | biological_process | FZD6,PBX2,CADM1,PSMB10,IGF1R,LAMB1,NPHP3,RAF1,COL9A1,BDNF,CPE,PLCD1,COL2A1,SUPT20H,MARCH5,BCL6,TBX2,CNTF,SMAD7,GLG1,ARHGEF12,RNH1,CD72,TTLL3,LEF1,PAX8,ITGA9,ADAMTS1,BCL2L11,CPM,PAM,ADAM8,CAPZB,PRPF40A,CD9,SIPA1L1,KRIT1,MINK1,PDLIM5,ACTR3,LHX4,VASP,CSNK2A1,PRKACA,SDCCAG8,JAG2,DNM1L,ZC3H12A,SLC11A2,AAMP,CNP,TBX18,BBS1,STK4,FGFR1,CAPRIN1,PAF1,KIAA0586,FKBP1A,YY1,SSH2,THBS3,CREB1,NF1,ZEB1,CRIP1,RGMB,COL18A1,NPR1,RPS6KA5,NIPBL,PKD2,SLC12A6,RB1,MAPK8IP3,ZFPM2,PAFAH1B1,IL18,ARPC2,ADAM15,USP33,BICD1,HEXA,NRP1,STX2,PTEN,FYN,ALDH1A3,RUNX2,FBXW7,SMARCD3,IFT172,PXN,SRGAP2,MEF2A,TCTN1,SSBP1,CACNB1,MYCBP2,CLTCL1,MYLK,RAB8A,TRIM28,COL9A3,PTPRC,UBP1,FLOT1,RANBP9,WDR35,PAK1,EVC,NCK2,RAB10,SEMA6A,CTSH,ACD,SEMA4D,CSF1R,C3,ROBO3,SS18,SMAD4,TGFB1I1,DDAH1,LMBR1,EZR,FLNA,GLI3,TMED2,ENG,NOX4,EXT1,ERCC1,GAA,STK36,TBCE,ASAP1,UNC5B,MDFI,PTPRD,ITGA5,PDGFRB,COL8A1,DZIP1,CC2D2A,FARP1,RUNX1,SMARCA4,KIF13B,PTPN23,TLN1,GSK3A,ANKRD6,NCOR2,FPGS,SETD2,COL13A1,PTGIS,TROVE2,MYO1E,SOX13,STAT6,TANC1,ROBO2,CACNB3,PMP22,CLIC4,NTRK1,BRWD1,SMAD9,DUSP6,TGFBR3,TMEM237,ZBTB16,SEPT2,PKD1,FOXC1,ACAN,STK24,SSH1,C2CD3,EYA2,CLASP1,TENM4,GATA2 | 1.178457216 | 7.90E-03 |
| GO:0016791 | phosphatase activity | molecular_function | MYO1D,EPHX2,PTPN22,PNKP,PTPN6,CSNK2A1,IGBP1,PPP5C,FKBP1A,MTMR11,PPM1F,SSH2,ZCCHC9,PTPRK,NTPCR,NEDD8-MDP1,MDP1,SYTL2,TENC1,MTMR14,PTEN,PHPT1,PTP4A2,PTPRF,PPP1R10,MEF2A,PTPRS,PTPRC,MTMR9,SEMA4D,TIMM50,CDC14B,PTPRD,PDGFRB,PTPN4,FARP1,PTPN23,PPAP2A,SPRED1,DUSP6,SSH1,EYA2,WNK1 | 1.459273373 | 7.94E-03 |
| GO:0006886 | intracellular protein transport | biological_process | RAB3GAP2,BCL6,NUP98,HDAC6,HGS,DERL2,SYTL4,RBPMS,AP3S2,UHMK1,KPNA6,PRKACA,NUTF2,HERC2,VAMP7,BBS1,VTI1A,HPS4,TIMM23,MDM2,SRP9,DDX58,RPL27,SNX13,AP4B1,NF1,RPL9,RAB31,PKD2,LMNA,STX16,SYTL2,GCC2,RPL24,RPL37A,STX2,SNX17,KPNB1,PPP1R10,CACNB1,CLTCL1,CSK,STX18,CLTB,GOPC,RAB10,VPS45,ACD,TIMM50,OS9,SMAD4,GRPEL2,C1QTNF3,RPL4,FLNA,GLI3,TMED2,VTI1B,SLC25A6,VAMP4,MDFI,STAM2,RPLP0,KIF13B,PDIA3,LONP2,ATG3,SPCS3,PKD1,KPNA1,UBR5 | 1.330399036 | 7.96E-03 |
| GO:0006418 | tRNA aminoacylation for protein translation | biological_process | TARS,NARS,RARS,GARS,FARSA,PPA2,CARS2,VARS,LARS | 2.526118593 | 7.98E-03 |
| GO:0051641 | cellular localization | biological_process | SLC25A37,RAB3GAP2,CADM1,RALGAPA2,BTN3A1,NOC2L,NLRP1,SEPT5,GAS8,BDNF,CPE,MARCH5,BCL6,GPAA1,CUX1,NUP98,SMAD7,USP4,HDAC6,DYNC1I1,HGS,DERL2,SYTL4,GLS,PAX8,RBPMS,XBP1,COG4,NISCH,PAM,AP3S2,UHMK1,ADAM8,RAB35,CD9,RANBP1,DDX39A,KPNA6,ACTR3,UPF3A,PRKACA,PLK1,NUTF2,DNM1L,UPF1,NPC1,HERC2,CNP,VAMP7,CAMK2D,FYTTD1,BBS1,SLC38A2,TPCN2,VTI1A,HPS4,DISP1,SNCAIP,TIMM23,CPT1B,SEC31A,MDM2,SNAP23,FKBP1A,TLN2,CREB1,SRP9,DDX58,RPL27,LCP2,PTPRK,SNX13,AP4B1,RHBDF1,NF1,NUMA1,RPL9,NIPBL,RAB31,CAPN10,PKD2,LMNA,RB1,LTBP4,STX16,BLOC1S5,TXNDC5,PAFAH1B1,STARD3,SYTL2,AACS,SYNE1,BICD1,GCC2,NR1H3,FLCN,RPL24,RPL37A,STX2,IQGAP1,PHPT1,SNX17,KPNB1,PPP1R10,MEF2A,OXCT1,WASH4P,NECAB3,CACNB1,CLTCL1,ABCA2,RAB8A,DENND4C,CSK,CDK5RAP2,PTPRC,STX18,CLTB,FLOT1,GOPC,PAK1,LEPROT,RAB10,SEMA6A,VPS45,ACD,CSF1R,ERC1,TIMM50,OS9,SRSF10,SMAD4,GRPEL2,C1QTNF3,EZR,RPL4,FLNA,RAB5A,SUN2,HGSNAT,ATP5A1,GLI3,TMED2,SDCBP2,THOC2,SCFD1,VTI1B,GAA,SLC25A6,VAMP4,MDFI,CIZ1,STAM2,NCBP2,MLX,VPS51,TGS1,RAP1B,CANX,RUNX1,LRPPRC,RPLP0,SDAD1,SNX27,KIF13B,RHBDF2,CRCP,TLN1,NLGN2,PDIA3,LONP2,CSNK1E,ATG3,LMF1,SPCS3,PKD1,PDPK1,TSG101,KPNA1,CD63,SCAMP1,UBR5,CLASP1,PABPN1 | 1.178215009 | 8.14E-03 |
| GO:0007417 | central nervous system development | biological_process | FZD6,EIF2B4,CADM1,CKB,IGF1R,PTS,COL2A1,FMR1,LEF1,PAX8,EMX2,BCL2L11,PAM,CD9,LHX4,SEPT4,CNP,CLN8,JHDM1D,GIGYF2,STK4,FGFR1,RAB18,SHARPIN,CREB1,NF1,ZEB1,NIPBL,PKD2,CASP2,MAPK8IP3,PAFAH1B1,PTEN,FYN,ALDH1A3,CTNS,SRGAP2,NCOR1,MEF2A,OXCT1,TCTN1,MYCBP2,PBX3,CSK,CDK5RAP2,PTPRS,CDK6,NR2C2,GLI3,ENG,EXT1,STK36,WWP1,EPOR,RUNX1,SMARCA4,NCOR2,FPGS,SETD2,ROBO2,CDK5RAP1,SMAD9,CTTNBP2,ZBTB16,PKD1,FOXC1,CDK5RAP3,C2CD3,TENM4,GATA2 | 1.332039936 | 8.15E-03 |
| GO:0030658 | transport vesicle membrane | cellular_component | CPE,HLA-DPB1,SYTL4,HLA-C,HLA-DQA1,VAMP7,SEC31A,MCFD2,CLTCL1,HLA-F,CLTB,SEC31B | 2.180778354 | 8.18E-03 |
| GO:0005813 | centrosome | cellular_component | SYTL4,STARD9,CEP135,MARK4,RANBP1,PRKACA,DHX9,PLK1,SDCCAG8,TTC19,HERC2,CCDC14,DPF2,TCHP,KIAA0586,ZFYVE26,DIS3L,FLII,PPP2R3C,GNAI1,PAFAH1B1,PLK2,CEP112,CSK,CDK5RAP2,DDHD2,FLOT1,WDR35,SMAD4,AK5,HAUS5,DZIP1,YIF1A,TLN1,DYNC1I2,PSMA1,CLIC4,BNIP2,C2CD3,CLASP1 | 1.480775426 | 8.20E-03 |
| GO:0045335 | phagocytic vesicle | cellular_component | RAB34,HLA-C,ADAM8,VAMP7,RAB31,SRGAP2,ITGB5,HLA-F,RAB8A,RAB10,ATP6V0A1 | 2.263626552 | 8.41E-03 |
| GO:0044249 | cellular biosynthetic process | biological_process | FZD6,OBFC1,PBX2,KANK2,ACADVL,EIF2B4,GTF3C2,RAI1,IGF1R,PTS,TNRC6A,SIRT2,MYNN,TRNAU1AP,NOC2L,TARS,RAF1,ZNF131,RSC1A1,SFSWAP,CDK13,TAZ,SIN3B,CBX5,SUPT5H,SUPT20H,ST3GAL1,PWP1,BCL6,FUBP1,ZNF783,CMPK2,TBX2,MMS19,SHMT2,EEF2K,PLD1,VAPB,GPAA1,CUX1,PGS1,NUP98,EED,FMR1,SMPD4,SMAD7,MCF2L,HDAC6,EHMT1,ZNF496,NARS,LANCL2,PNKP,LEF1,GLS,PAX8,SUPT4H1,ZNF83,EMX2,RBPMS,XYLT1,ZSCAN31,XBP1,FDPS,PAM,HSD17B12,APITD1,UHMK1,USP47,ADAM8,POLR3E,GABPB1,PCGF6,EEF1A1,LHX4,CSNK2A1,IGBP1,UPF3A,NOD1,STAT2,PIGS,PLK1,ZNF446,PNPO,ASNS,PTGES2,UPF1,ZNF621,HDGF,PPP5C,PIGG,PDXK,NPC1,CCNL1,CHD6,ZC3H12A,SLC11A2,FAM58A,CLN8,TBX18,PIGN,GCDH,LBX2,PCGF1,DR1,BCLAF1,ZNF721,ZNF397,JHDM1D,ZNF710,GIGYF2,WAC,ZNF142,FUBP3,RARS,ZNF540,ALDH18A1,FGFR1,HSF4,PAIP1,CAPRIN1,GTF3C1,NADSYN1,ADCY4,CELF1,PAF1,TAB2,SGK1,DPF2,CHKB,NADK,IDI1,RNF8,SEC31A,MDM2,PRKCH,PPM1F,ZNF595,TBP,YY1,INO80,GPAT2,GMEB2,MCFD2,PFDN5,CREB1,SRP9,FLII,RPRD1A,DDX58,RPL27,CCNL2,PTPRK,NF1,ZEB1,EIF4B,IFITM3,ASCC2,RGMB,EBF1,RPL9,MED28,NPR1,ZNF3,RPS6KA5,NIPBL,ADSL,ALG6,ST3GAL4,BRD9,GCNT2,ZNF837,PKD2,RXRB,LMNA,RSL1D1,MITF,NOL8,RB1,PRMT5,MZF1,ZFPM2,TP53BP1,RNF168,ZNF865,SENP2,ISYNA1,EDEM2,GPCPD1,PUM2,STARD3,SUB1,CHMP1A,PDE8A,ZNF558,GALNT2,ZNF263,ZNF180,BICD1,ZNF276,NR1H3,GARS,GRB10,MRPS7,USP7,PLD6,FLCN,ZNF605,ZNF410,GMDS,RPL24,UST,MTMR14,RPL37A,SAP30BP,MAST2,VPS72,PTEN,ALDH1A3,RNASEK,RUNX2,CSTF1,FBXW7,SMARCD3,IKBKB,RQCD1,RFX7,NCOR1,PPP1R10,MEF2A,FECH,SETD8,SMEK1,NECAB3,PIAS2,SSBP1,MAPK8,MYCBP2,USP15,DDX41,MAN1A2,PBX3,ZNF565,ABCA2,AFF4,TRIM28,DMTF1,CDK5RAP2,OAZ1,IMPDH1,UBP1,WDR61,EBF4,FARSA,ZNF148,ZNF76,STAG2,SP110,PPA2,ST6GALNAC5,PHKG2,NCK2,TCF4,ACD,IKZF5,HMGN2,SEMA4D,SSBP2,ERC1,C3,NFYC,HSD17B4,ELOVL1,FUT4,PIWIL4,SRSF10,SS18,RCOR3,SMAD4,CHURC1,CHURC1-FNTB,ZNF114,MIER2,C1QTNF3,TGFB1I1,DDAH1,INO80E,DTYMK,RPL4,MTRR,MBOAT2,ZNF44,CREBZF,ING4,CD276,RBMS1,EIF3M,ZNF687,NR2C2,FHOD1,DNTTIP2,MRPL49,FLNA,IRF9,MGAT5,ATP5A1,GLI3,THNSL2,MAPK12,CCDC59,DCAF6,AK5,B4GALT4,ENG,SIRT7,ZSCAN5A,TCF12,ARNT,NOX4,ZNF692,EXT1,GAPDH,PHF1,MTRF1L,B3GAT3,STK36,WWP1,PHF12,TBCE,MED6,MDFI,CIRBP,ZNF554,CIZ1,RGS2,HINFP,NCBP2,MAN2A2,LPCAT1,MLX,PDGFRB,TGS1,CDK11A,MAN1B1,GLIS3,ELP6,BDP1,DBF4,CANX,RUNX1,MKNK2,SMARCA4,NAA16,LRPPRC,RPLP0,RAD54L2,ZNF518B,CRCP,ZNF90,ZNF638,PER3,CHTF8,GSK3A,SNRPE,POLG,ZNF383,MRPL3,POLR2J3,NCOR2,FPGS,SETD2,PCYT1A,PIGO,PPAP2A,PDIA3,IGF2,PTGIS,TROVE2,ATXN3,PSTK,PHF21A,GPHN,PDCD4,SOX13,PGM2,CHD2,STAT6,CARS2,ZNF138,ZNF705A,NTRK1,TFAM,PHKG1,BRWD1,SMAD9,HBB,LMF1,TGFBR3,ZBTB16,BAZ2A,SIRT3,UCK1,SPCS3,EIF3I,RRP8,VARS,LARS,PHF19,LMCD1,PKD1,PDPK1,TSG101,USF1,FOXC1,DDAH2,ACAN,CDK5RAP3,FMOD,ALG9,PABPC1,PANK3,EYA2,SMARCAD1,CC2D1A,PLA2G16,GATA2,PABPN1 | 1.096609622 | 8.42E-03 |
| GO:0016241 | regulation of macroautophagy | biological_process | SUPT5H,NPC1,TBC1D14,WAC,NRBP2 | 3.742397915 | 8.46E-03 |
| GO:0048635 | negative regulation of muscle organ development | biological_process | SIRT2,BDNF,LUC7L,LEF1,GSK3A | 3.742397915 | 8.46E-03 |
| GO:0006448 | regulation of translational elongation | biological_process | RNF8,SRP9,RNF168,VARS,LARS | 3.742397915 | 8.46E-03 |
| GO:0006753 | nucleoside phosphate metabolic process | biological_process | CRBN,RAB3GAP2,DHX34,EIF2B4,MYO1D,RALGAPA2,RAF1,SEPT5,ATP2B1,RAB34,BCL6,CMPK2,GBP3,MCF2L,ARHGEF12,ATP6V1D,H6PD,PNKP,ARHGEF25,RGL4,STARD13,ABCC1,DDX23,DNAJC10,RAB35,RANBP1,SIPA1L1,DDX39A,KRIT1,SKIV2L,MINK1,RHOF,EEF1A1,DHX9,PDE7B,TBC1D2B,DNM1L,UPF1,FDXR,HERC2,CHD6,TBC1D10B,SEPT4,EFTUD2,CNP,TBC1D14,TNK2,GIT2,MTG1,RAB18,NADSYN1,PMS1,ADCY4,PDE4D,PLEKHG4,NADK,FAM13A,INO80,RALGPS2,PLEKHG5,DDX58,SNX13,NF1,RTKN,NPR1,G3BP1,RAB31,ADSL,PKD2,GALT,GNAI1,PAFAH1B1,PDE8A,DDX6,ACAP2,RGS3,GARS,CYTH2,FLCN,FMO2,GMDS,ARHGAP9,IDH1,IQGAP1,CTNS,SRGAP2,ATP11B,DDX41,RNF213,ABCA2,DENND4C,MAP4K4,ITPA,PSMC6,TBCD,IMPDH1,SKIV2L2,PSMC4,ARHGAP29,SGSM3,GOPC,RHEB,SEMA4D,GNB3,GRPEL2,TBC1D22A,DTYMK,RAB5A,ATP5A1,TMED2,RASGRF2,AK5,ATP8B2,ARHGEF7,ASAP1,REXO2,IDH3B,RGS2,RAD51B,FARP1,RAP1B,SMARCA4,DHX40,DOCK8,LONRF3,GSK3A,MYO1E,RGL2,CHD2,LONP2,ACIN1,PSD3,BNIP2,NTRK1,UCK1,DHX37,RAPGEF6,PANK3,SMARCAD1,DENND6B | 1.211412042 | 8.48E-03 |
| GO:0003697 | single-stranded DNA binding | molecular_function | OBFC1,FUBP1,RAD23A,PMS1,SUB1,SSBP1,ACD,SSBP2,RBMS1,ERCC1,LRPPRC | 2.251127142 | 8.66E-03 |
| GO:0031175 | neuron projection development | biological_process | FZD6,CLMN,IGF1R,LAMB1,RAF1,COL9A1,BDNF,COL2A1,ARHGEF12,CD72,ITGA9,UHMK1,SIPA1L1,MINK1,PDLIM5,ACTR3,LHX4,VASP,CSNK2A1,SLC11A2,CNP,FGFR1,CAPRIN1,SSH2,CREB1,NPTN,RGMB,RPS6KA5,RB1,MAPK8IP3,BLOC1S5,PAFAH1B1,USP33,NRP1,PTEN,FYN,SRGAP2,MEF2A,TCTN1,CACNB1,MYCBP2,RAB8A,COL9A3,PTPRC,FLOT1,RANBP9,PAK1,NCK2,RAB10,SEMA6A,SEMA4D,ROBO3,EZR,GLI3,EXT1,TBCE,UNC5B,PTPRD,ITGA5,FARP1,KIF13B,TLN1,ROBO2,CACNB3,PMP22,NTRK1,SEPT2,STK24,SSH1,CLASP1 | 1.328287711 | 8.68E-03 |
| GO:0010604 | positive regulation of macromolecule metabolic process | biological_process | OBFC1,PBX2,ACADVL,PSMB10,IGF1R,EPHX2,RAF1,SUPT5H,FUBP1,MMS19,ZFP91,CNTF,VAPB,SMAD7,MCF2L,HDAC6,ZNF496,LEF1,PAX8,SUPT4H1,PSMB9,RBPMS,XBP1,APITD1,UHMK1,ADAM8,GABPB1,CSNK2A1,IGBP1,UPF3A,NOD1,PRKACA,ANAPC4,PLK1,ASNS,PTGES2,HDGF,ZC3H12A,SEPT4,SYMPK,BCLAF1,JHDM1D,TNK2,WAC,STK4,FUBP3,FGFR1,HSF4,PAIP1,ADCY4,PAF1,TAB2,RNF8,SEC31A,MDM2,RHBDD1,FKBP1A,PPM1F,TBP,INO80,CREB1,NPTN,DDX58,ZEB1,NUB1,RGMB,EBF1,RPS6KA5,NIPBL,PKD2,RXRB,LMNA,MITF,RB1,MAPK8IP3,ZFPM2,TP53BP1,RNF168,SENP2,IL18,TPP1,NR1H3,FLCN,NRP1,PTEN,RUNX2,IQGAP1,FBXW7,SMARCD3,HERPUD1,IKBKB,PXN,NCOR1,MEF2A,PIAS2,MAPK8,DDX41,TRIM28,CSK,CDK5RAP2,PTPRC,PSMC6,CDK6,WDR61,ZNF148,PSMC4,SGSM3,PHKG2,PAK1,NCK2,CTSH,TCF4,SEMA4D,CSF1R,C3,NFYC,SS18,SMAD4,CHURC1,CHURC1-FNTB,TGFB1I1,CD276,CDC14B,NR2C2,FHOD1,GLI3,TMED2,DCAF6,ENG,SIRT7,TCF12,ARNT,NOX4,PHF1,PDIA5,MED6,MDFI,CIRBP,CIZ1,ITGA5,HINFP,NCBP2,LPCAT1,PDGFRB,GLIS3,CARD14,TNFRSF14,RUNX1,SMARCA4,NAA16,YIF1A,TLN1,GSK3A,IGF2,PSMA1,STAT6,CSNK1E,NTRK1,TFAM,TNFRSF10B,SMAD9,ZBTB16,PHF19,PKD1,PDPK1,USF1,FOXC1,CDK5RAP3,PABPC1,SMARCAD1,GATA2 | 1.184483371 | 8.81E-03 |
| GO:0007411 | axon guidance | biological_process | LAMB1,RAF1,COL9A1,BDNF,COL2A1,ARHGEF12,CD72,ITGA9,LHX4,VASP,CSNK2A1,FGFR1,CREB1,RGMB,RPS6KA5,MAPK8IP3,USP33,NRP1,FYN,SRGAP2,CACNB1,MYCBP2,COL9A3,PTPRC,RANBP9,PAK1,NCK2,SEMA6A,SEMA4D,ROBO3,EZR,GLI3,EXT1,UNC5B,ITGA5,TLN1,ROBO2,CACNB3,NTRK1,CLASP1 | 1.472418852 | 8.86E-03 |
| GO:0030054 | cell junction | cellular_component | LPP,CADM1,EPHX2,UTRN,F11R,RSC1A1,DPP4,SMAD7,SIPA1L1,KRIT1,MINK1,PDLIM5,ACTR3,VASP,SDCCAG8,SYMPK,VAMP7,CAMK2D,JAM2,TNK2,SIKE1,AFAP1,SNAP23,TLN2,FLII,DDX58,PTPRK,MAGI1,PKD2,NEXN,ESAM,ARPC2,ADAM15,FLCN,TENC1,STX2,FAP,IQGAP1,PXN,SRGAP2,TNS1,ITGB5,CSK,CDK5RAP2,PTPRC,TBCD,SGSM3,GOPC,PARD6G,PAK1,TGFB1I1,EZR,ADD3,VEZT,NOX4,ARHGEF7,ITGA5,RAP1B,TLN1,NLGN2,TWF1,COL13A1,MYO1E,GPHN,TANC1,PSD3,PMP22,CLIC4,LIMS2,LUC7L3,PDPK1,GAK | 1.322204199 | 8.86E-03 |
| GO:0070403 | NAD+ binding | molecular_function | SIRT2,ALDH1A3,SIRT7,SIRT3 | 4.502254283 | 9.14E-03 |
| GO:0050321 | tau-protein kinase activity | molecular_function | MARK4,PHKG2,GSK3A,PHKG1 | 4.502254283 | 9.14E-03 |
| GO:0090079 | translation regulator activity, nucleic acid binding | molecular_function | ZNF540,PAIP1,CELF1,PABPC1 | 4.502254283 | 9.14E-03 |
| GO:0048185 | activin binding | molecular_function | SMAD7,FKBP1A,ENG,TGFBR3 | 4.502254283 | 9.14E-03 |
| GO:0060419 | heart growth | biological_process | TBX2,FGFR1,RXRB,MEF2A,GSK3A,DUSP6,TGFBR3,FOXC1,TENM4 | 2.474565152 | 9.15E-03 |
| GO:0016575 | histone deacetylation | biological_process | SIRT2,HDAC6,NIPBL,NCOR1,MAPK8,SIRT7,ATXN3,BAZ2A,SMARCAD1 | 2.474565152 | 9.15E-03 |
| GO:0055086 | nucleobase-containing small molecule metabolic process | biological_process | CRBN,RAB3GAP2,DHX34,EIF2B4,MYO1D,RALGAPA2,RAF1,SEPT5,ATP2B1,RAB34,BCL6,CMPK2,GBP3,MCF2L,ARHGEF12,ATP6V1D,H6PD,PNKP,ARHGEF25,RGL4,STARD13,ABCC1,DDX23,DNAJC10,RAB35,RANBP1,SIPA1L1,DDX39A,KRIT1,SKIV2L,MINK1,RHOF,EEF1A1,DHX9,PDE7B,TBC1D2B,DNM1L,UPF1,FDXR,HERC2,CHD6,TBC1D10B,SEPT4,EFTUD2,CNP,TBC1D14,TNK2,GIT2,MTG1,RAB18,ERH,NADSYN1,PMS1,ADCY4,PDE4D,PLEKHG4,NADK,FAM13A,INO80,RALGPS2,PLEKHG5,DDX58,ALDH6A1,SNX13,NF1,RTKN,NPR1,G3BP1,RAB31,ADSL,PKD2,GALT,GNAI1,PAFAH1B1,PDE8A,DDX6,ACAP2,RGS3,GARS,CYTH2,FLCN,FMO2,GMDS,ARHGAP9,IDH1,IQGAP1,CTNS,SRGAP2,ATP11B,DDX41,RNF213,ABCA2,DENND4C,MAP4K4,ITPA,PSMC6,TBCD,IMPDH1,SKIV2L2,PSMC4,ARHGAP29,SGSM3,GOPC,RHEB,SEMA4D,GNB3,GRPEL2,TBC1D22A,DTYMK,RAB5A,ATP5A1,TMED2,RASGRF2,AK5,ATP8B2,ARHGEF7,ASAP1,REXO2,IDH3B,RGS2,RAD51B,FARP1,RAP1B,SMARCA4,DHX40,DOCK8,LONRF3,GSK3A,MYO1E,RGL2,CHD2,LONP2,ACIN1,PSD3,BNIP2,NTRK1,UCK1,DHX37,RAPGEF6,MTO1,PANK3,SMARCAD1,DENND6B | 1.205623559 | 9.20E-03 |
| GO:0006655 | phosphatidylglycerol biosynthetic process | biological_process | TAZ,PLD1,PGS1,PLD6 | 4.490877498 | 9.22E-03 |
| GO:0044085 | cellular component biogenesis | biological_process | CRBN,CADM1,IGF1R,RAF1,F11R,SFSWAP,BDNF,TAZ,SART1,RAB34,MMS19,SHMT2,GPAA1,CLNS1A,NUP98,SMAD7,HDAC6,TTLL3,ARPC4-TTLL3,GLS,BCL2L11,STARD9,COG4,PAM,DDX23,CAPZB,CD9,PDLIM5,ACTR3,VASP,NOD1,PRKACA,TTC19,DNM1L,RC3H1,PPP5C,ATG4B,BCLAF1,BBS1,TBC1D14,MTG1,HSF4,DISP1,CELF1,SNCAIP,SF3A2,SHARPIN,MDM2,FKBP1A,PRKCH,PPM1F,TLN2,INO80,SSH2,PTPRK,MAGI1,PIH1D1,ATG12,ADSL,MITF,NOL8,RB1,PRMT5,PUM2,NSA2,ARPC2,DDX6,BICD1,PLD6,FLCN,PTEN,IFT172,PXN,SRGAP2,NCOR1,MEF2A,TNS1,FECH,ERAL1,WASH4P,VILL,MYLK,RAB8A,TRIM28,TBCD,SKIV2L2,TSPAN4,COX14,ZNF148,GOPC,RANBP9,WDR35,ATPAF2,PARD6G,PAK1,NCK2,TCF4,ACD,ACTR2,SRSF10,SMAD4,C1QTNF3,EZR,CENPT,FHOD1,FLNA,RAB5A,HGSNAT,BCS1L,TMED2,NOX4,STK36,ARHGEF7,TBCE,CIRBP,NUP85,NUBP1,HAUS5,PTPRD,ITGA5,NCBP2,TGS1,DZIP1,CC2D2A,FARP1,RPLP0,SDAD1,KCTD2,TLN1,SNRPE,NLGN2,TWF1,FTSJ3,AMFR,ROBO2,KCTD17,TFAM,SHPRH,ATG3,HBB,TGFBR3,TMEM237,LIMS2,CD151,BAZ2A,RRP8,SEPT2,UQCRH,SENP6,PDPK1,SSH1,FMOD,C2CD3,SMARCAD1 | 1.195152882 | 9.43E-03 |
| GO:0009894 | regulation of catabolic process | biological_process | USP10,RAB3GAP2,RALGAPA2,SUPT5H,UBXN1,BCL6,SMAD7,ARHGEF12,HGS,STARD13,RAD23A,ADAM8,DNAJC10,RANBP1,SIPA1L1,CSNK2A1,PRKACA,PLK1,TBC1D2B,NPC1,ZC3H12A,TBC1D10B,ATG4B,TBC1D14,GIT2,WAC,MDM2,RHBDD1,FAM13A,SNX13,RHBDF1,NF1,NUB1,PAFAH1B1,ACAP2,RGS3,ARHGAP9,PTEN,FYN,IQGAP1,FBXW7,SRGAP2,NCOR1,TBCD,ARHGAP29,SGSM3,PHKG2,SEMA4D,SMAD4,TBC1D22A,FLNA,TMED2,ARNT,NRBP2,ARHGEF7,ASAP1,RGS2,LPCAT1,GSK3A,LONP2,CSNK1E,BNIP2,NTRK1,RAPGEF6,PABPC1 | 1.339023107 | 9.44E-03 |
| GO:0045930 | negative regulation of mitotic cell cycle | biological_process | BCL6,USP47,PAF1,RB1,CHMP1A,DGKZ,SMARCA4,FOXC1 | 2.62880634 | 9.51E-03 |
| GO:0007399 | nervous system development | biological_process | FZD6,EIF2B4,CADM1,CKB,CLMN,IGF1R,LAMB1,NPHP3,PTS,RAF1,COL9A1,BDNF,COL2A1,CNTF,CUX1,FMR1,ARHGEF12,CD72,LEF1,PAX8,EMX2,ITGA9,BCL2L11,PAM,MARK4,UHMK1,CD9,SIPA1L1,MINK1,PDLIM5,ACTR3,LHX4,VASP,CSNK2A1,JAG2,CHD6,SEPT4,SLC11A2,LSAMP,CNP,CLN8,JHDM1D,GIGYF2,STK4,FGFR1,RAB18,CAPRIN1,SHARPIN,PRKCH,SSH2,CREB1,NPTN,DFNA5,NF1,ZEB1,RGMB,RPS6KA5,NIPBL,PKD2,CASP2,ITGA3,RB1,MAPK8IP3,BLOC1S5,PAFAH1B1,MTCH1,TPP1,USP33,HEXA,NRP1,PTEN,FYN,ALDH1A3,SMARCD3,IFT172,CTNS,SRGAP2,NCOR1,MEF2A,OXCT1,TCTN1,CACNB1,MYCBP2,PBX3,RAB8A,CSK,CDK5RAP2,COL9A3,PTPRS,PTPRC,CDK6,FLOT1,RANBP9,PAK1,NCK2,RAB10,SEMA6A,TCF4,SEMA4D,ROBO3,SMAD4,NAV1,EZR,NR2C2,RAB5A,GLI3,TMED2,SDCBP2,ENG,TCF12,EXT1,NRBP2,STK36,SDHA,WWP1,ARHGEF7,TBCE,UNC5B,PTPRD,ITGA5,EPOR,FARP1,RUNX1,SMARCA4,KIF13B,TLN1,FGF14,GSK3A,NLGN2,NCOR2,FPGS,SETD2,ATXN3,PSD3,ROBO2,CACNB3,PMP22,CDK5RAP1,BNIP2,NTRK1,SMAD9,CTTNBP2,ZBTB16,SEPT2,PKD1,FOXC1,STK24,SEMA4B,SSH1,CDK5RAP3,C2CD3,WNK1,CLASP1,TENM4,GATA2 | 1.193972577 | 9.53E-03 |
| GO:1901564 | organonitrogen compound metabolic process | biological_process | CRBN,RAB3GAP2,DHX34,EIF2B4,PSMB10,CKB,PTS,MYO1D,RALGAPA2,TARS,RAF1,SEPT5,ATP2B1,RAB34,ST3GAL1,BCL6,CMPK2,ENOSF1,GBP3,SHMT2,VAPB,AMT,SMPD4,MCF2L,ARHGEF12,ATP6V1D,NARS,H6PD,GLS,PAX8,PSMB9,ARHGEF25,RGL4,XYLT1,STARD13,PAM,ABCC1,DDX23,DNAJC10,RAB35,RANBP1,SIPA1L1,DDX39A,KRIT1,SKIV2L,MINK1,RHOF,EEF1A1,DHX9,PNPO,PDE7B,ASNS,TBC1D2B,DNM1L,UPF1,FDXR,PDXK,HERC2,CHD6,TBC1D10B,SEPT4,SLC11A2,EFTUD2,CLN8,GCDH,DNPEP,TBC1D14,TNK2,GIT2,MTG1,RARS,ALDH18A1,RAB18,ERH,NADSYN1,PMS1,ADCY4,SNCAIP,PDE4D,PLEKHG4,CHKB,NADK,FKBP1A,FAM13A,INO80,RALGPS2,PLEKHG5,DDX58,ALDH6A1,SNX13,NF1,RTKN,NPR1,G3BP1,RAB31,ADSL,ST3GAL4,GCNT2,PKD2,GNAI1,PAFAH1B1,TPP1,PDE8A,DDX6,ACAP2,RGS3,GARS,CYTH2,HEXA,FLCN,FMO2,ARHGAP9,UST,IDH1,IQGAP1,CTNS,SRGAP2,ATP11B,FECH,DDX41,RNF213,ABCA2,DENND4C,MAP4K4,ITPA,OAZ1,PSMC6,TBCD,IMPDH1,SKIV2L2,FARSA,PSMC4,ARHGAP29,SGSM3,GOPC,PPA2,ST6GALNAC5,RHEB,CTSH,SEMA4D,GNB3,P4HB,ELOVL1,GRPEL2,TBC1D22A,DDAH1,DTYMK,MTRR,MBOAT2,DLST,RAB5A,HGSNAT,ATP5A1,TMED2,THNSL2,RASGRF2,AK5,GUSB,B4GALT4,NOX4,EXT1,B3GAT3,ATP8B2,ARHGEF7,ASAP1,IDH3B,RGS2,LPCAT1,PDGFRB,RAD51B,FARP1,RAP1B,SMARCA4,DHX40,DOCK8,LONRF3,GSK3A,FPGS,PCYT1A,PPAP2A,MYO1E,GPHN,RGL2,CHD2,LONP2,PSMA1,CARS2,ACIN1,PSD3,CTBS,BNIP2,NTRK1,UCK1,SPCS3,VARS,LARS,DHX37,FOXC1,DDAH2,ACAN,RAPGEF6,FMOD,MTO1,PANK3,DENND6B,PLA2G16 | 1.160753782 | 9.60E-03 |
| GO:0023051 | regulation of signaling | biological_process | FZD6,CDK14,KANK2,IGF1R,NPHP3,RALGAPA2,RAF1,BDNF,BCL6,PTPN22,ZFP91,CNTF,SMAD7,MCF2L,HDAC6,GLG1,ARHGEF12,VRK2,HGS,LANCL2,SYTL4,LEF1,PAX8,ARHGEF25,BCL2L11,RBPMS,STARD13,XBP1,NISCH,ADAM8,SIPA1L1,MINK1,RHOF,PTPN6,CSNK2A1,IGBP1,NOD1,PRKACA,STAT2,TBC1D2B,DNM1L,RC3H1,PPP5C,SHISA5,RHOBTB1,TBC1D10B,SEPT4,MIB2,TBX18,BCLAF1,TBC1D14,USP20,GIT2,STK4,FGFR1,DISP1,SNCAIP,TAB2,PLEKHG4,SHARPIN,MDM2,FKBP1A,PRKCH,FAM13A,PFDN5,CREB1,NPTN,PLEKHG5,SNX13,RHBDF1,NF1,ZEB1,G3BP1,CAPN10,PKD2,RB1,LTBP4,MAPK8IP3,PAFAH1B1,SENP2,MTCH1,AACS,ACAP2,USP33,BICD1,RGS3,NR1H3,CYTH2,GRB10,PLK2,FLCN,ARHGAP9,PTEN,FYN,RUNX2,IQGAP1,FBXW7,PHPT1,IKBKB,RQCD1,PXN,SRGAP2,LTBR,NCOR1,MEF2A,OXCT1,SETD8,TCTN1,PIAS2,MAPK8,SH3BP2,USP15,RAB8A,MAP4K4,CSK,PTPRC,RNF146,FLOT1,ARHGAP29,SGSM3,AAK1,PAK1,EVC,NCK2,LEPROT,RHEB,SEMA4D,CSF1R,DGKZ,C3,SMAD4,TBC1D22A,C1QTNF3,TGFB1I1,GOLPH3,LRPAP1,APOL3,FLNA,GLI3,RASGRF2,EPS15L1,EPN1,ENG,ARNT,NOX4,BICC1,SLC25A6,STK36,ARHGEF7,ASAP1,UNC5B,MDFI,ITGA5,RGS2,STAM2,PDGFRB,CARD14,FARP1,RAP1B,RUNX1,SMARCA4,ADRBK2,GSK3A,ANKRD6,NLGN2,IGF2,PTGIS,PDCD4,SNX14,RGL2,CRIPAK,PSD3,CSNK1E,BNIP2,NTRK1,SPRED1,TNFRSF10B,DUSP6,TGFBR3,TMEM237,SPCS3,LMCD1,PDPK1,RAPGEF6,C2CD3,UBR5,CC2D1A,TENM4,GATA2 | 1.170187289 | 9.60E-03 |
| GO:0009116 | nucleoside metabolic process | biological_process | CRBN,RAB3GAP2,DHX34,EIF2B4,MYO1D,RALGAPA2,SEPT5,ATP2B1,RAB34,BCL6,GBP3,MCF2L,ARHGEF12,ATP6V1D,ARHGEF25,RGL4,STARD13,ABCC1,DDX23,DNAJC10,RAB35,RANBP1,SIPA1L1,DDX39A,KRIT1,SKIV2L,MINK1,RHOF,EEF1A1,DHX9,TBC1D2B,DNM1L,UPF1,HERC2,CHD6,TBC1D10B,SEPT4,EFTUD2,TBC1D14,TNK2,GIT2,MTG1,RAB18,ERH,PMS1,PLEKHG4,NADK,FAM13A,INO80,RALGPS2,PLEKHG5,DDX58,SNX13,NF1,RTKN,G3BP1,RAB31,ADSL,GNAI1,PAFAH1B1,DDX6,ACAP2,RGS3,CYTH2,FLCN,ARHGAP9,IQGAP1,CTNS,SRGAP2,ATP11B,DDX41,RNF213,ABCA2,DENND4C,MAP4K4,PSMC6,TBCD,IMPDH1,SKIV2L2,PSMC4,ARHGAP29,SGSM3,GOPC,RHEB,SEMA4D,GNB3,GRPEL2,TBC1D22A,RAB5A,ATP5A1,TMED2,RASGRF2,AK5,ATP8B2,ARHGEF7,ASAP1,RGS2,RAD51B,FARP1,RAP1B,SMARCA4,DHX40,DOCK8,LONRF3,MYO1E,RGL2,CHD2,LONP2,ACIN1,PSD3,BNIP2,NTRK1,UCK1,DHX37,RAPGEF6,MTO1,PANK3,DENND6B | 1.230472627 | 9.68E-03 |
| GO:0010629 | negative regulation of gene expression | biological_process | KANK2,TNRC6A,SIRT2,NOC2L,SIN3B,CBX5,SUPT5H,BCL6,TBX2,CUX1,EED,SMAD7,HDAC6,EHMT1,ZNF496,LANCL2,LEF1,SUPT4H1,USP47,PCGF6,IGBP1,PLK1,HDGF,ZC3H12A,TBX18,DR1,BCLAF1,ZNF540,FGFR1,HSF4,CELF1,PAF1,MDM2,PPM1F,YY1,PFDN5,CREB1,PTPRK,ZEB1,RPS6KA5,NIPBL,RB1,PRMT5,ZFPM2,CHMP1A,ZNF263,NR1H3,FLCN,VPS72,FYN,RUNX2,NCOR1,MEF2A,SETD8,UPK3B,TRIM28,UBP1,ZNF148,TCF4,SEMA4D,PIWIL4,SMAD4,C1QTNF3,CREBZF,ING4,GLI3,ENG,SIRT7,WWP1,PHF12,MDFI,HINFP,NCBP2,MLX,GLIS3,SMARCA4,PER3,NCOR2,PHF21A,PDCD4,STAT6,ZBTB16,BAZ2A,RRP8,LMCD1,TSG101,PABPC1,CC2D1A,GATA2 | 1.275600311 | 9.74E-03 |
| GO:0005911 | cell-cell junction | cellular_component | CADM1,F11R,DPP4,SMAD7,KRIT1,SDCCAG8,SYMPK,CAMK2D,JAM2,TLN2,DDX58,PTPRK,MAGI1,PKD2,ESAM,FLCN,STX2,IQGAP1,CSK,TBCD,SGSM3,PARD6G,PAK1,ADD3,ITGA5,RAP1B,TLN1,TWF1,COL13A1,MYO1E,PMP22,CLIC4 | 1.538785185 | 9.95E-03 |
| GO:1901565 | organonitrogen compound catabolic process | biological_process | CRBN,RAB3GAP2,DHX34,EIF2B4,MYO1D,RALGAPA2,SEPT5,ATP2B1,RAB34,BCL6,ENOSF1,GBP3,AMT,SMPD4,MCF2L,ARHGEF12,ATP6V1D,GLS,ARHGEF25,RGL4,STARD13,ABCC1,DDX23,DNAJC10,RAB35,RANBP1,SIPA1L1,DDX39A,KRIT1,SKIV2L,MINK1,RHOF,EEF1A1,DHX9,PDE7B,TBC1D2B,DNM1L,UPF1,HERC2,CHD6,TBC1D10B,SEPT4,EFTUD2,GCDH,TBC1D14,TNK2,GIT2,MTG1,RAB18,PMS1,PDE4D,PLEKHG4,FAM13A,INO80,RALGPS2,PLEKHG5,DDX58,ALDH6A1,SNX13,NF1,RTKN,G3BP1,RAB31,GNAI1,PAFAH1B1,TPP1,PDE8A,DDX6,ACAP2,RGS3,CYTH2,HEXA,ARHGAP9,IQGAP1,SRGAP2,ATP11B,DDX41,RNF213,ABCA2,DENND4C,MAP4K4,ITPA,PSMC6,TBCD,SKIV2L2,PSMC4,ARHGAP29,SGSM3,GOPC,RHEB,CTSH,SEMA4D,GNB3,GRPEL2,TBC1D22A,DDAH1,DLST,RAB5A,HGSNAT,ATP5A1,TMED2,THNSL2,RASGRF2,GUSB,ATP8B2,ARHGEF7,ASAP1,RGS2,RAD51B,FARP1,RAP1B,SMARCA4,DHX40,DOCK8,LONRF3,MYO1E,RGL2,CHD2,LONP2,ACIN1,PSD3,CTBS,BNIP2,NTRK1,DHX37,DDAH2,ACAN,RAPGEF6,FMOD,DENND6B | 1.21543527 | 9.98E-03 |
| GO:0002768 | immune response-regulating cell surface receptor signaling pathway | biological_process | BTN3A1,HLA-DPB1,PTPN22,HLA-DQA1,PTPN6,VASP,RC3H1,TAB2,PRKCH,LCP2,PTEN,FYN,PHPT1,IKBKB,MEF2A,CSK,PTPRC,PAK1,CACNB3,PDPK1 | 1.749692532 | 1.01E-02 |
| GO:0035556 | intracellular signal transduction | biological_process | USP10,PSMB10,IGF1R,RALGAPA2,RAF1,PLCD1,SART1,RAB34,BCL6,ZFP91,CNTF,PLD1,SMAD7,MCF2L,ARHGEF12,VRK2,HGS,DGKA,PSMB9,ARHGEF25,RGL4,BCL2L11,STARD13,NISCH,ADAM8,DNAJC10,RAB35,SIPA1L1,KRIT1,MINK1,RHOF,PTPN6,IGBP1,NOD1,PRKACA,STAT2,TBC1D2B,DNM1L,PPP5C,SHISA5,RHOBTB1,TBC1D10B,SEPT4,MIB2,RAB24,BCLAF1,CAMK2D,PLCB4,TBC1D14,TNK2,GIT2,STK4,FGFR1,RAB18,ADCY4,TAB2,PLEKHG4,SHARPIN,MDM2,FKBP1A,PRKCH,PPM1F,FAM13A,CREB1,RALGPS2,PLEKHG5,DDX58,NF1,SPSB3,RTKN,NPR1,RPS6KA5,G3BP1,RAB31,PKD2,CASP2,RB1,MAPK8IP3,PAFAH1B1,IL18,PDE8A,STK38L,ACAP2,SH3BP5,RGS3,CYTH2,PLK2,FLCN,CUL4A,TENC1,ARHGAP9,PTEN,FYN,SRPK1,IQGAP1,FBXW7,IKBKB,PXN,SRGAP2,LTBR,NCOR1,MEF2A,TNS1,SETD8,MAPK8,RAB8A,MAP4K4,CSK,PTPRC,PSMC6,FLOT1,PSMC4,ARHGAP29,SGSM3,PAK1,LEPROT,RAB10,RHEB,CTSH,SEMA4D,CSF1R,ERC1,DGKZ,SS18,TBC1D22A,C1QTNF3,DDAH1,ASB8,GOLPH3,TANK,ING4,APOL3,FLNA,RAB5A,SDCBP2,MAPK12,RASGRF2,NOX4,STK36,ARHGEF7,DEF8,ASAP1,MDFI,RGS2,PDGFRB,CARD14,DIABLO,FARP1,RAP1B,MKNK2,FGF14,DOCK8,GSK3A,POLR2J3,IGF2,MOB1A,PDCD4,ARL15,RGL2,RABL3,PSMA1,PSD3,BNIP2,NTRK1,SPRED1,TNFRSF10B,DUSP6,TGFBR3,RRP8,LMCD1,PKD1,PDPK1,DDAH2,STK24,RAPGEF6,WNK1,CC2D1A | 1.175865854 | 1.02E-02 |
| GO:0006986 | response to unfolded protein | biological_process | ACADVL,VAPB,DERL2,XBP1,ASNS,HDGF,SEC31A,RHBDD1,SERPINH1,LMNA,EDEM2,TPP1,HERPUD1,PDIA5,YIF1A,TLN1,GSK3A,AMFR | 1.809756604 | 1.02E-02 |
| GO:0009164 | nucleoside catabolic process | biological_process | CRBN,RAB3GAP2,DHX34,EIF2B4,MYO1D,RALGAPA2,SEPT5,ATP2B1,RAB34,BCL6,GBP3,MCF2L,ARHGEF12,ATP6V1D,ARHGEF25,RGL4,STARD13,ABCC1,DDX23,DNAJC10,RAB35,RANBP1,SIPA1L1,DDX39A,KRIT1,SKIV2L,MINK1,RHOF,EEF1A1,DHX9,TBC1D2B,DNM1L,UPF1,HERC2,CHD6,TBC1D10B,SEPT4,EFTUD2,TBC1D14,TNK2,GIT2,MTG1,RAB18,PMS1,PLEKHG4,FAM13A,INO80,RALGPS2,PLEKHG5,DDX58,SNX13,NF1,RTKN,G3BP1,RAB31,GNAI1,PAFAH1B1,DDX6,ACAP2,RGS3,CYTH2,ARHGAP9,IQGAP1,SRGAP2,ATP11B,DDX41,RNF213,ABCA2,DENND4C,MAP4K4,PSMC6,TBCD,SKIV2L2,PSMC4,ARHGAP29,SGSM3,GOPC,RHEB,SEMA4D,GNB3,GRPEL2,TBC1D22A,RAB5A,ATP5A1,TMED2,RASGRF2,ATP8B2,ARHGEF7,ASAP1,RGS2,RAD51B,FARP1,RAP1B,SMARCA4,DHX40,DOCK8,LONRF3,MYO1E,RGL2,CHD2,LONP2,ACIN1,PSD3,BNIP2,NTRK1,DHX37,RAPGEF6,DENND6B | 1.241505383 | 1.02E-02 |
| GO:0044431 | Golgi apparatus part | cellular_component | PPIL2,HLA-DPB1,ST3GAL1,PLD1,CUX1,SMPD4,GLG1,IL15RA,HLA-C,XYLT1,COG4,HLA-DQA1,RNF24,ACTR3,LMAN2,PTGES2,VTI1A,MMP16,QSOX1,RHBDF1,ST3GAL4,GCNT2,GOLGA8B,GOLGA8A,MAPK8IP3,STX16,GALNT2,UST,NECAB3,CLSTN2,CLTCL1,MAN1A2,HLA-F,SLC35D2,STX18,NSFL1C,CLTB,GOPC,ST6GALNAC5,LEPROT,VPS45,ERC1,FUT4,TMED3,SLC35A4,GOLPH3,MGAT5,TMED2,B4GALT4,SCFD1,PCSK7,EXT1,B3GAT3,VAMP4,MAN2A2,LPCAT1,VPS51,YIF1A,CORO7,SLC9A8,ACAN,FMOD,GORASP1 | 1.341825951 | 1.02E-02 |
| GO:0005652 | nuclear lamina | cellular_component | LMNA,LMNB1,NARF | 5.997140474 | 1.02E-02 |
| GO:0005677 | chromatin silencing complex | cellular_component | SIRT2,BAZ2A,RRP8 | 5.997140474 | 1.02E-02 |
| GO:0004221 | ubiquitin thiolesterase activity | molecular_function | USP10,USP4,USP47,USP20,USP24,USP3,USP33,PAN2,USP7,USP15,USP54,USP40,ATXN3 | 2.041719966 | 1.04E-02 |
| GO:0031301 | integral to organelle membrane | cellular_component | HLA-DPB1,ST3GAL1,GPAA1,CUX1,DERL2,HLA-C,HLA-DQA1,MARCH6,PIGS,TIMM23,RHBDD1,QSOX1,EMC3,ST3GAL4,PKD2,GALNT2,HLA-F,TMEM66,EMC4,ST6GALNAC5,ELOVL1,PCSK7,EXT1,CANX,AMFR | 1.634734553 | 1.04E-02 |
| GO:0032580 | Golgi cisterna membrane | cellular_component | ST3GAL1,ST3GAL4,GOLGA8B,GOLGA8A,GALNT2,FUT4,TMED3,GOLPH3,TMED2,B4GALT4,SCFD1 | 2.198951507 | 1.04E-02 |
| GO:0051345 | positive regulation of hydrolase activity | biological_process | RAB3GAP2,ACADVL,RALGAPA2,NLRP1,VAPB,ARHGEF12,BCL2L13,BCL2L11,STARD13,XBP1,DNAJC10,RANBP1,SIPA1L1,NOD1,PRKACA,ASNS,TBC1D2B,HDGF,TBC1D10B,SLC11A2,TBC1D14,GIT2,FGFR1,ADCY4,SEC31A,PPM1F,FAM13A,CREB1,SNX13,NF1,LMNA,MTCH1,TPP1,ACAP2,RGS3,NR1H3,ARHGAP9,IQGAP1,HERPUD1,SRGAP2,MEF2A,SSBP1,MAPK8,TBCD,ARHGAP29,SGSM3,CTSH,SEMA4D,TBC1D22A,ARHGEF7,PDIA5,ASAP1,RGS2,PDGFRB,DIABLO,YIF1A,TLN1,GSK3A,BNIP2,NTRK1,TNFRSF10B,LMF1 | 1.342931213 | 1.04E-02 |
| GO:0048585 | negative regulation of response to stimulus | biological_process | FZD6,KANK2,IGF1R,NPHP3,BCL6,PTPN22,SMAD7,GLG1,ARHGEF12,HGS,LEF1,PTPN6,IGBP1,RC3H1,NPC1,TBX18,STK4,SHARPIN,MDM2,PFDN5,SNX13,NF1,G3BP1,RB1,PAFAH1B1,BICD1,RGS3,NR1H3,GRB10,FLCN,NRP1,PTEN,FYN,RUNX2,FBXW7,PHPT1,RQCD1,NCOR1,PIAS2,USP15,CSK,PTPRC,CDK6,LEPROT,DGKZ,C1QTNF3,TGFB1I1,CD276,LRPAP1,GLI3,EPS15L1,EPN1,ENG,BICC1,NRBP2,ARHGEF7,UNC5B,MDFI,RGS2,STAM2,SMARCA4,ADRBK2,GSK3A,ANKRD6,PTGIS,PDCD4,SNX14,CRIPAK,PSMA1,STAT6,ROBO2,CSNK1E,SPRED1,DUSP6,TGFBR3,PDPK1,UBR5,GATA2 | 1.295764901 | 1.05E-02 |
| GO:0071702 | organic substance transport | biological_process | RAB3GAP2,CADM1,BTN3A1,NLRP1,SLC16A3,BDNF,CCDC91,RAB34,SLC38A9,BCL6,NUP98,FMR1,HDAC6,ATP6V1D,HGS,DERL2,SYTL4,GLS,PAX8,RBPMS,XBP1,COG4,NISCH,PAM,AP3S2,UHMK1,ADAM8,RAB35,DDX39A,KPNA6,UPF3A,PRKACA,VPS52,LMAN2,NUTF2,DNM1L,UPF1,NPC1,HERC2,NUP210,RAB24,ATG4B,SLC26A6,CLN8,VAMP7,FYTTD1,SLC16A1,BBS1,SLC38A2,VTI1A,HPS4,RAB18,DISP1,SLC4A2,TIMM23,CPT1B,SEC31A,MDM2,SNAP23,SFT2D2,MCFD2,SRP9,DDX58,RPL27,LCP2,SNX13,AP4B1,RHBDF1,SNX21,NF1,RPL9,RAB31,CAPN10,PKD2,LMNA,LTBP4,STX16,PAFAH1B1,MFSD10,SENP2,STARD3,SYTL2,CHMP1A,AACS,GCC2,NR1H3,GRB10,RPL24,RPL37A,STX2,IQGAP1,PHPT1,CTNS,SNX17,KPNB1,NCOR1,ATP11B,PPP1R10,OXCT1,NECAB3,CACNB1,CLTCL1,OSBPL3,ABCA2,RAB8A,SLC35D2,DENND4C,CSK,STX18,NUP37,CLTB,GOPC,RAB10,VPS45,ACD,CSF1R,ATP6V0A1,ERC1,TIMM50,OS9,C3,SRSF10,TMED3,SMAD4,GRPEL2,C1QTNF3,SLC35A4,SLC4A4,RPL4,SLC23A2,APOL3,FLNA,RAB5A,CA5B,GLI3,TMED2,THOC2,MCOLN1,SCFD1,VTI1B,SLC25A6,ATP8B2,VAMP4,MDFI,NUP85,SLCO2B1,STAM2,NCBP2,VPS51,RAP1B,CANX,RUNX1,LRPPRC,YIF1A,RPLP0,SDAD1,SNX27,KIF13B,RHBDF2,GSK3A,ATG4A,PDIA3,ATG16L2,SLC38A5,SNX14,LONP2,ATG3,HBB,LMF1,SEC31B,SPCS3,SEPT2,PKD1,TSG101,KPNA1,SCAMP1,UBR5,GORASP1,PABPN1 | 1.173528572 | 1.05E-02 |
| GO:0019003 | GDP binding | molecular_function | EIF2B4,MCF2L,ARHGEF12,ARHGEF25,RGL4,RAB35,RANBP1,HERC2,RAB18,PLEKHG4,RALGPS2,PLEKHG5,RAB31,CYTH2,RAB8A,DENND4C,RAB10,RHEB,RAB5A,RASGRF2,ARHGEF7,FARP1,RAP1B,DOCK8,RGL2,PSD3,RAPGEF6,DENND6B | 1.582382259 | 1.05E-02 |
| GO:0051253 | negative regulation of RNA metabolic process | biological_process | KANK2,SIRT2,NOC2L,SFSWAP,SIN3B,CBX5,SUPT5H,BCL6,TBX2,CUX1,EED,SMAD7,HDAC6,EHMT1,ZNF496,LANCL2,LEF1,SUPT4H1,USP47,PCGF6,IGBP1,PLK1,HDGF,TBX18,DR1,BCLAF1,ZNF540,FGFR1,HSF4,PAF1,MDM2,PPM1F,YY1,PFDN5,CREB1,PTPRK,ZEB1,IFITM3,RPS6KA5,NIPBL,RB1,PRMT5,ZFPM2,CHMP1A,ZNF263,NR1H3,FLCN,VPS72,RUNX2,NCOR1,MEF2A,SETD8,TRIM28,UBP1,ZNF148,TCF4,SEMA4D,SRSF10,SMAD4,CREBZF,ING4,GLI3,ENG,SIRT7,WWP1,PHF12,MDFI,HINFP,MLX,GLIS3,SMARCA4,PER3,NCOR2,PHF21A,PDCD4,STAT6,ZBTB16,BAZ2A,RRP8,LMCD1,TSG101,PABPC1,CC2D1A,GATA2 | 1.281654733 | 1.06E-02 |
| GO:0070646 | protein modification by small protein removal | biological_process | USP10,USP4,USP47,USP20,COPS7B,USP3,SENP2,USP33,USP7,USP15,ATXN3,SENP6 | 2.099631038 | 1.09E-02 |
| GO:0071013 | catalytic step 2 spliceosome | cellular_component | SART1,DDX23,EFTUD2,SF3A2,HNRNPA3,DDX41,SRRM2,SKIV2L2,PRPF8,SNRPE,PRPF4B,PABPC1 | 2.098999166 | 1.10E-02 |
| GO:0048699 | generation of neurons | biological_process | FZD6,CLMN,IGF1R,LAMB1,RAF1,COL9A1,BDNF,COL2A1,CNTF,CUX1,ARHGEF12,CD72,LEF1,EMX2,ITGA9,UHMK1,SIPA1L1,MINK1,PDLIM5,ACTR3,LHX4,VASP,CSNK2A1,JAG2,SLC11A2,CNP,CLN8,GIGYF2,FGFR1,CAPRIN1,PRKCH,SSH2,CREB1,NPTN,DFNA5,NF1,ZEB1,RGMB,RPS6KA5,ITGA3,RB1,MAPK8IP3,BLOC1S5,PAFAH1B1,MTCH1,USP33,HEXA,NRP1,PTEN,FYN,SMARCD3,SRGAP2,MEF2A,TCTN1,CACNB1,MYCBP2,PBX3,RAB8A,CDK5RAP2,COL9A3,PTPRC,CDK6,FLOT1,RANBP9,PAK1,NCK2,RAB10,SEMA6A,TCF4,SEMA4D,ROBO3,SMAD4,NAV1,EZR,GLI3,TCF12,EXT1,NRBP2,TBCE,UNC5B,PTPRD,ITGA5,FARP1,RUNX1,KIF13B,TLN1,PSD3,ROBO2,CACNB3,PMP22,CDK5RAP1,BNIP2,NTRK1,SEPT2,STK24,SSH1,CDK5RAP3,WNK1,CLASP1,TENM4,GATA2 | 1.248381543 | 1.10E-02 |
| GO:0019900 | kinase binding | molecular_function | UTRN,RAF1,PTPN22,PAM,PDLIM5,PTPN6,EEF1A1,IGBP1,PRKACA,PLK1,CCNL1,FAM58A,TBC1D14,STK11IP,TPCN2,CCNL2,PTPRK,NPR1,RB1,MAPK8IP3,PTEN,IQGAP1,IKBKB,PXN,MEF2A,PARN,PRKRIP1,RAB8A,CDK5RAP2,PTPRC,PAK1,RHEB,FLNA,ARHGEF7,RAD54L2,KIF13B,GSK3A,CDK5RAP1,SPRED1,PKD1,PDPK1,USF1,CDK5RAP3 | 1.430519218 | 1.10E-02 |
| GO:0003779 | actin binding | molecular_function | CLMN,MYO1D,UTRN,HDAC6,CAPZB,PDLIM5,ACTR3,VASP,MIB2,AFAP1,TLN2,INO80,SSH2,FLII,LIMCH1,TPM4,MED28,NEXN,ARPC2,SYNE1,STK38L,DAAM1,TNS1,WASH4P,VILL,MYLK,TRPM7,ACTR2,EZR,FHOD1,FLNA,ADD3,MYO7B,LRPPRC,TLN1,TWF1,MYO1E,CORO7,SSH1 | 1.459179366 | 1.11E-02 |
| GO:0034329 | cell junction assembly | biological_process | CADM1,F11R,SMAD7,CD9,VASP,PRKACA,PRKCH,PPM1F,TLN2,PTPRK,FLCN,PTEN,PXN,TNS1,TBCD,PARD6G,FLNA,ITGA5,TLN1,LIMS2,CD151,PDPK1 | 1.684079062 | 1.11E-02 |
| GO:0000785 | chromatin | cellular_component | CBX5,EED,CSNK2A1,UPF1,TBP,YY1,INO80,CREB1,RB1,USP3,NR1H3,RUNX2,SMARCD3,NCOR1,PPP1R10,MEF2A,TRIM28,WDR61,STAG2,HMGN2,INO80E,SIRT7,PHF12,NCAPD3,SMARCA4,NCOR2,MAU2,STAT6,SHPRH,BAZ2A,RRP8,FOXC1,SMARCAD1 | 1.514032185 | 1.13E-02 |
| GO:0034713 | type I transforming growth factor beta receptor binding | molecular_function | SMAD7,FKBP1A,ENG | 5.78861265 | 1.13E-02 |
| GO:0004176 | ATP-dependent peptidase activity | molecular_function | CRBN,LONRF3,LONP2 | 5.78861265 | 1.13E-02 |
| GO:0005681 | spliceosomal complex | cellular_component | SART1,RBM17,SNRNP70,DDX23,SUGP1,UPF1,EFTUD2,PRPF3,WAC,SF3A2,HNRNPA3,DDX41,SRRM2,SKIV2L2,PRPF8,RHEB,SNRPE,PRPF4B,PABPC1 | 1.760749852 | 1.13E-02 |
| GO:0045842 | positive regulation of mitotic metaphase/anaphase transition | biological_process | PLK1,RB1,PTEN | 5.773985354 | 1.14E-02 |
| GO:0060318 | definitive erythrocyte differentiation | biological_process | NCOR1,SMARCA4,TGFBR3 | 5.773985354 | 1.14E-02 |
| GO:0050855 | regulation of B cell receptor signaling pathway | biological_process | PTPN22,PRKCH,PTPRC | 5.773985354 | 1.14E-02 |
| GO:0051488 | activation of anaphase-promoting complex activity | biological_process | PLK1,PTEN,CDC14B | 5.773985354 | 1.14E-02 |
| GO:0009415 | response to water stimulus | biological_process | CD9,PKD2,NTRK1 | 5.773985354 | 1.14E-02 |
| GO:0072235 | metanephric distal tubule development | biological_process | PAX8,PKD2,PKD1 | 5.773985354 | 1.14E-02 |
| GO:0009186 | deoxyribonucleoside diphosphate metabolic process | biological_process | CMPK2,DTYMK,AK5 | 5.773985354 | 1.14E-02 |
| GO:1901658 | glycosyl compound catabolic process | biological_process | CRBN,RAB3GAP2,DHX34,EIF2B4,MYO1D,RALGAPA2,SEPT5,ATP2B1,RAB34,BCL6,GBP3,MCF2L,ARHGEF12,ATP6V1D,ARHGEF25,RGL4,STARD13,ABCC1,DDX23,DNAJC10,RAB35,RANBP1,SIPA1L1,DDX39A,KRIT1,SKIV2L,MINK1,RHOF,EEF1A1,DHX9,TBC1D2B,DNM1L,UPF1,HERC2,CHD6,TBC1D10B,SEPT4,EFTUD2,TBC1D14,TNK2,GIT2,MTG1,RAB18,PMS1,PLEKHG4,FAM13A,INO80,RALGPS2,PLEKHG5,DDX58,SNX13,NF1,RTKN,G3BP1,RAB31,GNAI1,PAFAH1B1,DDX6,ACAP2,RGS3,CYTH2,ARHGAP9,IQGAP1,SRGAP2,ATP11B,DDX41,RNF213,ABCA2,DENND4C,MAP4K4,PSMC6,TBCD,SKIV2L2,PSMC4,ARHGAP29,SGSM3,GOPC,RHEB,SEMA4D,GNB3,GRPEL2,TBC1D22A,RAB5A,ATP5A1,TMED2,RASGRF2,ATP8B2,ARHGEF7,ASAP1,RGS2,RAD51B,FARP1,RAP1B,SMARCA4,DHX40,DOCK8,LONRF3,MYO1E,RGL2,CHD2,LONP2,ACIN1,PSD3,BNIP2,NTRK1,DHX37,RAPGEF6,DENND6B | 1.236231359 | 1.15E-02 |
| GO:0030182 | neuron differentiation | biological_process | FZD6,CLMN,IGF1R,LAMB1,RAF1,COL9A1,BDNF,COL2A1,CNTF,CUX1,ARHGEF12,CD72,LEF1,EMX2,ITGA9,UHMK1,SIPA1L1,MINK1,PDLIM5,ACTR3,LHX4,VASP,CSNK2A1,JAG2,SLC11A2,CNP,CLN8,GIGYF2,FGFR1,CAPRIN1,SSH2,CREB1,NPTN,DFNA5,ZEB1,RGMB,RPS6KA5,RB1,MAPK8IP3,BLOC1S5,PAFAH1B1,MTCH1,USP33,HEXA,NRP1,PTEN,FYN,SRGAP2,MEF2A,TCTN1,CACNB1,MYCBP2,PBX3,RAB8A,CDK5RAP2,COL9A3,PTPRC,FLOT1,RANBP9,PAK1,NCK2,RAB10,SEMA6A,TCF4,SEMA4D,ROBO3,SMAD4,EZR,GLI3,TCF12,EXT1,NRBP2,TBCE,UNC5B,PTPRD,ITGA5,FARP1,RUNX1,KIF13B,TLN1,PSD3,ROBO2,CACNB3,PMP22,CDK5RAP1,BNIP2,NTRK1,SEPT2,STK24,SSH1,CDK5RAP3,WNK1,CLASP1,GATA2 | 1.257624086 | 1.16E-02 |
| GO:0001932 | regulation of protein phosphorylation | biological_process | ACADVL,IGF1R,RAF1,ZFP91,CNTF,EEF2K,VAPB,SMAD7,RBPMS,XBP1,ADAM8,DNAJC10,PTPN6,NOD1,PRKACA,PLK1,ASNS,HDGF,CCNL1,FAM58A,TNK2,STK4,FGFR1,ADCY4,TAB2,SEC31A,PPM1F,NPTN,CCNL2,NF1,RPS6KA5,PKD2,LMNA,RB1,MAPK8IP3,SENP2,TPP1,SH3BP5,RGS3,FLCN,NRP1,PTEN,IQGAP1,FBXW7,HERPUD1,PXN,FECH,PRKRIP1,CSK,PTPRC,PAK1,NCK2,SEMA4D,CSF1R,C3,SMAD4,AK5,ENG,NOX4,PDIA5,MDFI,ITGA5,RGS2,PDGFRB,CARD14,TNFRSF14,YIF1A,TLN1,GSK3A,TWF1,IGF2,PDCD4,CRIPAK,CDK5RAP1,NTRK1,SPRED1,TNFRSF10B,DUSP6,PKD1,PDPK1,CDK5RAP3,WNK1 | 1.280134258 | 1.18E-02 |
| GO:0010468 | regulation of gene expression | biological_process | FZD6,PBX2,KANK2,EIF2B4,RAI1,TNRC6A,SIRT2,EPHX2,MYNN,TRNAU1AP,NOC2L,ZNF131,RSC1A1,SFSWAP,CDK13,SIN3B,CBX5,COL2A1,SUPT5H,BCL6,FUBP1,ZNF783,TBX2,MMS19,CUX1,EED,FMR1,SMAD7,MCF2L,USP4,HDAC6,GLG1,EHMT1,ZNF496,LANCL2,LEF1,PAX8,SUPT4H1,ZNF83,EMX2,RBPMS,ZSCAN31,XBP1,PAM,SNRNP70,UHMK1,USP47,ADAM8,GABPB1,PCGF6,EEF1A1,LHX4,CSNK2A1,IGBP1,UPF3A,NOD1,STAT2,DHX9,PLK1,ZNF446,PTGES2,UPF1,ZNF621,HDGF,RC3H1,CCNL1,CHD6,ZC3H12A,FAM58A,TBX18,LBX2,PCGF1,DR1,BCLAF1,ZNF721,ZNF397,JHDM1D,ZNF710,GIGYF2,WAC,ZNF142,FUBP3,ZNF540,FGFR1,HPS4,HSF4,C2,CFB,PAIP1,CAPRIN1,CELF1,PAF1,TAB2,SGK1,DPF2,RNF8,MDM2,RHBDD1,PRKCH,PPM1F,ZNF595,TBP,YY1,INO80,GMEB2,PFDN5,CREB1,SRP9,FLII,RPRD1A,DDX58,CCNL2,PTPRK,ZEB1,EIF4B,CRIP1,SERBP1,ASCC2,RGMB,EBF1,MED28,ZNF3,RPS6KA5,NIPBL,ALKBH3,BRD9,ZNF837,PKD2,RXRB,LMNA,MITF,RB1,PRMT5,MAPK8IP3,USP3,MZF1,ZFPM2,TP53BP1,RNF168,ZNF865,SENP2,IL18,PUM2,SUB1,CHMP1A,PDE8A,ZNF558,ZNF263,ZNF180,BICD1,ZNF276,NR1H3,USP7,PLD6,FLCN,ZNF605,ZNF410,SAP30BP,VPS72,PTEN,FYN,SRPK1,RUNX2,FBXW7,SMARCD3,IKBKB,RQCD1,RFX7,NCOR1,MEF2A,FECH,SETD8,PIAS2,MAPK8,MYCBP2,UPK3B,USP15,DDX41,PBX3,ZNF565,ABCA2,AFF4,TRIM28,DMTF1,CDK5RAP2,UBP1,CDK6,WDR61,EBF4,ZNF148,ZNF76,AAK1,SP110,NCK2,CTSH,ZSWIM7,TCF4,IKZF5,HMGN2,SEMA4D,SSBP2,ERC1,C3,NFYC,PIWIL4,SRSF10,SS18,RCOR3,SMAD4,CHURC1,CHURC1-FNTB,ZNF114,MIER2,C1QTNF3,TGFB1I1,INO80E,ZNF44,CREBZF,ING4,ZNF687,CLK3,NR2C2,FHOD1,DNTTIP2,FLNA,IRF9,GLI3,TMED2,MAPK12,CCDC59,DCAF6,ENG,SIRT7,ZSCAN5A,TCF12,ARNT,ZNF692,GAPDH,PHF1,STK36,WWP1,PHF12,MED6,MDFI,CIRBP,ZNF554,RGS2,HINFP,NCBP2,MLX,TGS1,CDK11A,GLIS3,ELP6,BDP1,RUNX1,MKNK2,SMARCA4,NAA16,LRPPRC,ZNF518B,CLK4,ZNF90,ZNF638,PER3,ZNF383,NCOR2,SETD2,IGF2,PTGIS,ATXN3,PSTK,PHF21A,PDCD4,SOX13,CHD2,STAT6,SON,ZNF138,ZNF705A,NTRK1,TFAM,BRWD1,SMAD9,TGFBR3,ZBTB16,BAZ2A,RRP8,VARS,LARS,PHF19,LMCD1,PKD1,PDPK1,TSG101,USF1,FOXC1,HEMK1,CDK5RAP3,PABPC1,FASTK,EYA2,SMARCAD1,CC2D1A,GATA2 | 1.118136846 | 1.18E-02 |
| GO:0043039 | tRNA aminoacylation | biological_process | TARS,NARS,RARS,GARS,FARSA,PPA2,CARS2,VARS,LARS | 2.377523381 | 1.19E-02 |
| GO:0043038 | amino acid activation | biological_process | TARS,NARS,RARS,GARS,FARSA,PPA2,CARS2,VARS,LARS | 2.377523381 | 1.19E-02 |
| GO:0010008 | endosome membrane | cellular_component | HLA-DPB1,PLD1,HGS,HLA-C,HLA-DQA1,VPS52,NPC1,SLC11A2,VAMP7,HLA-DMB,TPCN2,TAB2,SNX13,IFITM3,STARD3,CHMP1A,ATP11B,WASH4P,HLA-F,ABCA2,APPL2,LEPROT,RAB10,VPS45,ATP6V0A1,RAB5A,SUN2,MCOLN1,STAM2,CD164,NTRK1,TSG101,CD63,SCAMP1 | 1.496141963 | 1.21E-02 |
| GO:0031985 | Golgi cisterna | cellular_component | ST3GAL1,ST3GAL4,GOLGA8B,GOLGA8A,GALNT2,NECAB3,FUT4,TMED3,GOLPH3,TMED2,B4GALT4,SCFD1 | 2.073085596 | 1.21E-02 |
| GO:0061136 | regulation of proteasomal protein catabolic process | biological_process | UBXN1,SMAD7,RAD23A,PRKACA,PLK1,WAC,MDM2,RHBDF1,NUB1,PTEN,CSNK1E | 2.147810977 | 1.22E-02 |
| GO:0051348 | negative regulation of transferase activity | biological_process | IGF1R,PTPN6,PLK1,CLN8,PPM1F,NF1,RB1,SH3BP5,RGS3,PTEN,PHPT1,PRKRIP1,CSK,PTPRC,RGS2,GSK3A,PDCD4,CRIPAK,CDK5RAP1,SPRED1,DUSP6,PDPK1,WNK1 | 1.648247592 | 1.22E-02 |
| GO:0004518 | nuclease activity | molecular_function | ACADVL,XRN1,VAPB,RNH1,PNKP,XBP1,RPP14,ASNS,HDGF,ZC3H12A,RNASET2,SEC31A,DIS3L,G3BP1,LMNA,TPP1,PAN2,RNASEK,HERPUD1,PARN,ERCC1,PDIA5,REXO2,YIF1A,TLN1,GSK3A,POLG,ERI3 | 1.56276595 | 1.24E-02 |
| GO:0090305 | nucleic acid phosphodiester bond hydrolysis | biological_process | ACADVL,XRN1,VAPB,RNH1,PNKP,XBP1,RPP14,ASNS,HDGF,ZC3H12A,RNASET2,SEC31A,DIS3L,G3BP1,LMNA,TPP1,PAN2,RNASEK,CSTF1,HERPUD1,KPNB1,PARN,ERCC1,PDIA5,REXO2,YIF1A,TLN1,GSK3A,POLG,ERI3,KPNA1,SMARCAD1 | 1.512716631 | 1.24E-02 |
| GO:0035064 | methylated histone residue binding | molecular_function | CBX5,JHDM1D,TP53BP1,ING4,PHF1,NCAPD3,RRP8,PHF19 | 2.512886112 | 1.25E-02 |
| GO:2000134 | negative regulation of G1/S transition of mitotic cell cycle | biological_process | KANK2,PKD2,SLFN11,PTEN | 4.145425383 | 1.25E-02 |
| GO:0015631 | tubulin binding | molecular_function | VAPB,GPAA1,HDAC6,DYNC1I1,BCL2L11,STARD9,MARK4,PLK1,INO80,TRAF3IP1,PAFAH1B1,MAST2,FYN,WASH4P,CDK5RAP2,TBCD,AGBL5,SUN2,GAPDH,LRPPRC,CLASP1 | 1.688345356 | 1.26E-02 |
| GO:0050854 | regulation of antigen receptor-mediated signaling pathway | biological_process | PTPN22,PTPN6,RC3H1,PRKCH,PHPT1,PTPRC | 2.993918332 | 1.26E-02 |
| GO:0055017 | cardiac muscle tissue growth | biological_process | TBX2,FGFR1,RXRB,MEF2A,GSK3A,TGFBR3,FOXC1,TENM4 | 2.506536278 | 1.27E-02 |
| GO:0002312 | B cell activation involved in immune response | biological_process | BCL6,RNF8,RNF168,PTPRC,SWAP70,ERCC1,LGALS8,STAT6 | 2.506536278 | 1.27E-02 |
| GO:0009150 | purine ribonucleotide metabolic process | biological_process | CRBN,RAB3GAP2,DHX34,EIF2B4,MYO1D,RALGAPA2,RAF1,SEPT5,ATP2B1,RAB34,BCL6,GBP3,MCF2L,ARHGEF12,ATP6V1D,ARHGEF25,RGL4,STARD13,ABCC1,DDX23,DNAJC10,RAB35,RANBP1,SIPA1L1,DDX39A,KRIT1,SKIV2L,MINK1,RHOF,EEF1A1,DHX9,PDE7B,TBC1D2B,DNM1L,UPF1,HERC2,CHD6,TBC1D10B,SEPT4,EFTUD2,TBC1D14,TNK2,GIT2,MTG1,RAB18,PMS1,ADCY4,PDE4D,PLEKHG4,NADK,FAM13A,INO80,RALGPS2,PLEKHG5,DDX58,SNX13,NF1,RTKN,NPR1,G3BP1,RAB31,ADSL,PKD2,GNAI1,PAFAH1B1,PDE8A,DDX6,ACAP2,RGS3,CYTH2,FLCN,ARHGAP9,IQGAP1,CTNS,SRGAP2,ATP11B,DDX41,RNF213,ABCA2,DENND4C,MAP4K4,ITPA,PSMC6,TBCD,IMPDH1,SKIV2L2,PSMC4,ARHGAP29,SGSM3,GOPC,RHEB,SEMA4D,GNB3,GRPEL2,TBC1D22A,RAB5A,ATP5A1,TMED2,RASGRF2,AK5,ATP8B2,ARHGEF7,ASAP1,RGS2,RAD51B,FARP1,RAP1B,SMARCA4,DHX40,DOCK8,LONRF3,GSK3A,MYO1E,RGL2,CHD2,LONP2,ACIN1,PSD3,BNIP2,NTRK1,DHX37,RAPGEF6,PANK3,DENND6B | 1.212341385 | 1.27E-02 |
| GO:0071556 | integral to lumenal side of endoplasmic reticulum membrane | cellular_component | HLA-DPB1,HLA-C,HLA-DQA1,PKD2,HLA-F,CANX | 2.998570237 | 1.27E-02 |
| GO:0031967 | organelle envelope | cellular_component | SLC25A37,ACADVL,RAF1,SLC16A3,TAZ,CBX5,MARCH5,SHMT2,NLN,PGS1,NUP98,SLC9B2,VRK2,IL15RA,BCL2L13,BCL2L11,STARD13,RANBP1,NUTF2,TTC19,DNM1L,FDXR,NPC1,SHISA5,HERC2,NUP210,CNP,GCDH,ALDH18A1,TIMM23,CPT1B,GPAT2,LMNA,DHRS1,PAFAH1B1,SENP2,MTCH1,SYNE1,PLD6,KPNB1,SRGAP2,ATP11B,FECH,ERAL1,COX7A2L,OSBPL3,NUP37,COX14,PAK1,TIMM50,GRPEL2,DTYMK,GOLPH3,CDC14B,SUN2,BCS1L,ATP5A1,NDUFV1,NDUFS2,SLC25A6,SDHA,NUP85,DIABLO,LETMD1,LMNB1,LRPPRC,POLG,FPGS,SFXN3,WDFY3,ATXN3,SLC25A24,BNIP2,SLC25A46,LETM1,UQCRH,KPNA1,BCL2L2 | 1.285606085 | 1.27E-02 |
| GO:1901135 | carbohydrate derivative metabolic process | biological_process | CRBN,RAB3GAP2,DHX34,EIF2B4,MYO1D,SIRT2,RALGAPA2,RAF1,SEPT5,ATP2B1,COL2A1,RAB34,ST3GAL1,BCL6,CMPK2,GBP3,GPAA1,SMPD4,MCF2L,ARHGEF12,ATP6V1D,ARHGEF25,RGL4,XYLT1,STARD13,ABCC1,DDX23,MPDU1,DNAJC10,RAB35,RANBP1,SIPA1L1,DDX39A,KRIT1,SKIV2L,MINK1,RHOF,EEF1A1,DHX9,PIGS,PDE7B,TBC1D2B,DNM1L,UPF1,PIGG,NPC1,HERC2,CHD6,TBC1D10B,SEPT4,EFTUD2,PIGN,TBC1D14,TNK2,GIT2,MTG1,RAB18,ERH,PMS1,ADCY4,PDE4D,PLEKHG4,NADK,SEC31A,FAM13A,INO80,GPAT2,MCFD2,RALGPS2,NAGK,PLEKHG5,DDX58,SNX13,NF1,RTKN,NPR1,G3BP1,RAB31,ADSL,ALG6,ST3GAL4,GCNT2,PKD2,GALT,GNAI1,PAFAH1B1,EDEM2,PDE8A,DDX6,ACAP2,GALNT2,RGS3,CYTH2,HEXA,FLCN,GMDS,ARHGAP9,UST,IQGAP1,CTNS,SRGAP2,ATP11B,NECAB3,DDX41,MAN1A2,RNF213,ABCA2,DENND4C,MAP4K4,ITPA,PSMC6,TBCD,IMPDH1,SKIV2L2,PSMC4,ARHGAP29,SGSM3,GOPC,ST6GALNAC5,RHEB,SEMA4D,GNB3,FUT4,GRPEL2,TBC1D22A,DTYMK,RAB5A,HGSNAT,MGAT5,ATP5A1,TMED2,RASGRF2,AK5,GUSB,B4GALT4,EXT1,B3GAT3,ATP8B2,ARHGEF7,ASAP1,RGS2,MAN2A2,PDGFRB,RAD51B,MAN1B1,FARP1,RAP1B,CANX,SMARCA4,DHX40,DOCK8,LONRF3,GSK3A,PIGO,PDIA3,MYO1E,PGM2,RGL2,CHD2,LONP2,ACIN1,PSD3,CTBS,BNIP2,NTRK1,LMF1,SIRT3,UCK1,DHX37,FOXC1,ACAN,RAPGEF6,FMOD,MTO1,ALG9,PANK3,DENND6B,PLA2G16 | 1.168109393 | 1.27E-02 |
| GO:0008219 | cell death | biological_process | KANK2,CADM1,PSMB10,IGF1R,NOC2L,RAF1,NLRP1,PPP1R13B,BDNF,SART1,COL2A1,RILPL1,BCL6,CNTF,VAPB,SMAD7,MCF2L,HDAC6,ARHGEF12,CASP4,LEF1,PAX8,PSMB9,BCL2L13,BCL2L11,NISCH,MARK4,USP47,ADAM8,NOL3,DNAJC10,XAF1,KRIT1,PTPN6,LHX4,CSNK2A1,IGBP1,NOD1,PLK1,ASNS,JAG2,DNM1L,SHISA5,ZC3H12A,SEPT4,SLC11A2,CLN8,BCLAF1,GIGYF2,STK4,FGFR1,SNCAIP,SGK1,SHARPIN,DPF2,TCHP,MDM2,RHBDD1,ZFYVE26,PRKCH,PPM1F,TBP,TNFRSF25,PLEKHG5,DFNA5,NF1,CRIP1,COL18A1,RTKN,CAPN10,CASP2,LMNA,MITF,RB1,ZFPM2,TXNDC5,MFSD10,IL18,MTCH1,TPP1,SYNE1,ANXA5,GARS,PLK2,HEXA,FLCN,CUL4A,SAP30BP,PTEN,FYN,ALDH1A3,LGMN,HERPUD1,KPNB1,SRGAP2,LTBR,MEF2A,MAPK8,DDX41,PTPRC,PSMC6,EMC4,PSMC4,PAK1,SEMA6A,CTSH,TRPM7,SEMA4D,TIMM50,SMAD4,ING4,GLI3,RASGRF2,NOX4,GAPDH,ERCC1,TEX261,NRBP2,SLC25A6,ARHGEF7,UNC5B,ITGA5,CDK11A,CARD14,DIABLO,MKNK2,LMNB1,FGF14,POLG,PDIA3,PTGIS,ATXN3,PDCD4,PSMA1,ACIN1,ROBO2,SON,BNIP2,NTRK1,TNFRSF10B,ATG3,HBB,DUSP6,ZBTB16,RRP8,LUC7L3,PDPK1,FOXC1,KPNA1,DDAH2,STK24,FASTK,EYA2,BCL2L2-PABPN1,BCL2L2 | 1.183149029 | 1.30E-02 |
| GO:0002204 | somatic recombination of immunoglobulin genes involved in immune response | biological_process | BCL6,RNF8,RNF168,PTPRC,SWAP70,ERCC1,STAT6 | 2.694526499 | 1.30E-02 |
| GO:0045190 | isotype switching | biological_process | BCL6,RNF8,RNF168,PTPRC,SWAP70,ERCC1,STAT6 | 2.694526499 | 1.30E-02 |
| GO:0002208 | somatic diversification of immunoglobulins involved in immune response | biological_process | BCL6,RNF8,RNF168,PTPRC,SWAP70,ERCC1,STAT6 | 2.694526499 | 1.30E-02 |
| GO:1901657 | glycosyl compound metabolic process | biological_process | CRBN,RAB3GAP2,DHX34,EIF2B4,MYO1D,RALGAPA2,SEPT5,ATP2B1,RAB34,BCL6,GBP3,MCF2L,ARHGEF12,ATP6V1D,ARHGEF25,RGL4,STARD13,ABCC1,DDX23,DNAJC10,RAB35,RANBP1,SIPA1L1,DDX39A,KRIT1,SKIV2L,MINK1,RHOF,EEF1A1,DHX9,TBC1D2B,DNM1L,UPF1,HERC2,CHD6,TBC1D10B,SEPT4,EFTUD2,TBC1D14,TNK2,GIT2,MTG1,RAB18,ERH,PMS1,PLEKHG4,NADK,FAM13A,INO80,RALGPS2,PLEKHG5,DDX58,SNX13,NF1,RTKN,G3BP1,RAB31,ADSL,GNAI1,PAFAH1B1,DDX6,ACAP2,RGS3,CYTH2,FLCN,ARHGAP9,IQGAP1,CTNS,SRGAP2,ATP11B,DDX41,RNF213,ABCA2,DENND4C,MAP4K4,PSMC6,TBCD,IMPDH1,SKIV2L2,PSMC4,ARHGAP29,SGSM3,GOPC,RHEB,SEMA4D,GNB3,GRPEL2,TBC1D22A,RAB5A,ATP5A1,TMED2,RASGRF2,AK5,ATP8B2,ARHGEF7,ASAP1,RGS2,RAD51B,FARP1,RAP1B,SMARCA4,DHX40,DOCK8,LONRF3,MYO1E,RGL2,CHD2,LONP2,ACIN1,PSD3,BNIP2,NTRK1,UCK1,DHX37,RAPGEF6,MTO1,PANK3,DENND6B | 1.217282262 | 1.32E-02 |
| GO:0031267 | small GTPase binding | molecular_function | RAF1,GAS8,SYTL4,RANBP1,PRKCH,RTKN,SYTL2,BICD1,DAAM1,IQGAP1,SRGAP2,RAB8A,SGSM3,RANBP9,ERC1,FLNA,RAP1B,RAPGEF6 | 1.761751676 | 1.32E-02 |
| GO:0043161 | proteasomal ubiquitin-dependent protein catabolic process | biological_process | CRBN,PSMB10,SIRT2,SPOP,UBXN1,SMAD7,DERL2,PSMB9,RAD23A,DNAJC10,ANAPC4,PLK1,WAC,MDM2,RHBDD1,NUB1,PTEN,FBXW7,PSMC6,PSMC4,OS9,WWP1,MAN1B1,ATXN3,AMFR,PSMA1,CSNK1E | 1.567935678 | 1.33E-02 |
| GO:0005160 | transforming growth factor beta receptor binding | molecular_function | SMAD7,FKBP1A,USP15,ENG,TGFBR3 | 3.376690712 | 1.34E-02 |
| GO:0016265 | death | biological_process | KANK2,CADM1,PSMB10,IGF1R,NOC2L,RAF1,NLRP1,PPP1R13B,BDNF,SART1,COL2A1,RILPL1,BCL6,CNTF,VAPB,SMAD7,MCF2L,HDAC6,ARHGEF12,CASP4,LEF1,PAX8,PSMB9,BCL2L13,BCL2L11,NISCH,MARK4,USP47,ADAM8,NOL3,DNAJC10,XAF1,KRIT1,PTPN6,LHX4,CSNK2A1,IGBP1,NOD1,PLK1,ASNS,JAG2,DNM1L,SHISA5,ZC3H12A,SEPT4,SLC11A2,CLN8,BCLAF1,GIGYF2,STK4,FGFR1,SNCAIP,SGK1,SHARPIN,DPF2,TCHP,MDM2,RHBDD1,ZFYVE26,PRKCH,PPM1F,TBP,TNFRSF25,PLEKHG5,DFNA5,NF1,CRIP1,COL18A1,RTKN,CAPN10,CASP2,LMNA,MITF,RB1,ZFPM2,TXNDC5,MFSD10,IL18,MTCH1,TPP1,SYNE1,ANXA5,GARS,PLK2,HEXA,FLCN,CUL4A,SAP30BP,PTEN,FYN,ALDH1A3,LGMN,HERPUD1,KPNB1,SRGAP2,LTBR,MEF2A,MAPK8,DDX41,PTPRC,PSMC6,EMC4,PSMC4,PAK1,SEMA6A,CTSH,TRPM7,SEMA4D,TIMM50,SMAD4,ING4,GLI3,RASGRF2,NOX4,GAPDH,ERCC1,TEX261,NRBP2,SLC25A6,ARHGEF7,UNC5B,ITGA5,CDK11A,CARD14,DIABLO,MKNK2,LMNB1,FGF14,POLG,PDIA3,PTGIS,ATXN3,PDCD4,PSMA1,ACIN1,ROBO2,SON,BNIP2,NTRK1,TNFRSF10B,ATG3,HBB,DUSP6,ZBTB16,RRP8,LUC7L3,PDPK1,FOXC1,KPNA1,DDAH2,STK24,FASTK,EYA2,BCL2L2-PABPN1,BCL2L2 | 1.181809868 | 1.35E-02 |
| GO:0060216 | definitive hemopoiesis | biological_process | NCOR1,RUNX1,SMARCA4,TGFBR3,GATA2 | 3.368158123 | 1.35E-02 |
| GO:0007346 | regulation of mitotic cell cycle | biological_process | KANK2,PSMB10,SIRT2,CDK13,BCL6,PSMB9,USP47,RANBP1,PTPN6,CSNK2A1,ANAPC4,PLK1,ASNS,PAF1,MDM2,INO80,PKD2,CASP2,RB1,PRMT5,PAFAH1B1,SLFN11,CHMP1A,PLK2,CUL4A,CHFR,PTEN,PSMC6,PSMC4,DGKZ,PDGFRB,SMARCA4,IGF2,PSMA1,FOXC1 | 1.473569179 | 1.35E-02 |
| GO:0031023 | microtubule organizing center organization | biological_process | CEP135,RANBP1,PLK1,PKD2,PAFAH1B1,GCC2,PLK2,CDK5RAP2,HAUS5,BNIP2,CLASP1 | 2.117127963 | 1.36E-02 |
| GO:0003924 | GTPase activity | molecular_function | RAB3GAP2,EIF2B4,RALGAPA2,SEPT5,RAB34,BCL6,GBP3,MCF2L,ARHGEF12,ARHGEF25,RGL4,STARD13,RAB35,RANBP1,SIPA1L1,KRIT1,MINK1,RHOF,EEF1A1,TBC1D2B,DNM1L,HERC2,TBC1D10B,SEPT4,EFTUD2,TBC1D14,TNK2,GIT2,MTG1,RAB18,PLEKHG4,FAM13A,RALGPS2,PLEKHG5,SNX13,NF1,RTKN,RAB31,GNAI1,PAFAH1B1,ACAP2,RGS3,CYTH2,ARHGAP9,IQGAP1,SRGAP2,DENND4C,MAP4K4,TBCD,ARHGAP29,SGSM3,GOPC,RHEB,SEMA4D,GNB3,TBC1D22A,RAB5A,TMED2,RASGRF2,ARHGEF7,ASAP1,RGS2,FARP1,RAP1B,DOCK8,RGL2,PSD3,BNIP2,NTRK1,RAPGEF6,DENND6B | 1.29767275 | 1.37E-02 |
| GO:0005769 | early endosome | cellular_component | USP10,RAB34,HGS,DERL2,HLA-C,NISCH,MIB2,SLC11A2,SNX13,RAB31,CHMP1A,PTP4A2,CTNS,SNX17,ATP11B,WASH4P,HLA-F,APPL2,RAB5A,STAM2,SNX27,NTRK1,TSG101 | 1.633738776 | 1.37E-02 |
| GO:0009259 | ribonucleotide metabolic process | biological_process | CRBN,RAB3GAP2,DHX34,EIF2B4,MYO1D,RALGAPA2,RAF1,SEPT5,ATP2B1,RAB34,BCL6,GBP3,MCF2L,ARHGEF12,ATP6V1D,ARHGEF25,RGL4,STARD13,ABCC1,DDX23,DNAJC10,RAB35,RANBP1,SIPA1L1,DDX39A,KRIT1,SKIV2L,MINK1,RHOF,EEF1A1,DHX9,PDE7B,TBC1D2B,DNM1L,UPF1,HERC2,CHD6,TBC1D10B,SEPT4,EFTUD2,TBC1D14,TNK2,GIT2,MTG1,RAB18,PMS1,ADCY4,PDE4D,PLEKHG4,NADK,FAM13A,INO80,RALGPS2,PLEKHG5,DDX58,SNX13,NF1,RTKN,NPR1,G3BP1,RAB31,ADSL,PKD2,GNAI1,PAFAH1B1,PDE8A,DDX6,ACAP2,RGS3,CYTH2,FLCN,ARHGAP9,IQGAP1,CTNS,SRGAP2,ATP11B,DDX41,RNF213,ABCA2,DENND4C,MAP4K4,ITPA,PSMC6,TBCD,IMPDH1,SKIV2L2,PSMC4,ARHGAP29,SGSM3,GOPC,RHEB,SEMA4D,GNB3,GRPEL2,TBC1D22A,RAB5A,ATP5A1,TMED2,RASGRF2,AK5,ATP8B2,ARHGEF7,ASAP1,RGS2,RAD51B,FARP1,RAP1B,SMARCA4,DHX40,DOCK8,LONRF3,GSK3A,MYO1E,RGL2,CHD2,LONP2,ACIN1,PSD3,BNIP2,NTRK1,UCK1,DHX37,RAPGEF6,PANK3,DENND6B | 1.208091149 | 1.37E-02 |
| GO:0043414 | macromolecule methylation | biological_process | EED,EHMT1,PRMT10,METTL3,PRMT5,NTMT1,USP7,PLD6,SETD8,N6AMT1,WDR61,WDR4,PIWIL4,PHF1,TGS1,SMARCA4,SETD2,FTSJ3,BAZ2A,PHF19,HEMK1 | 1.674114097 | 1.37E-02 |
| GO:0031329 | regulation of cellular catabolic process | biological_process | USP10,RAB3GAP2,RALGAPA2,SUPT5H,UBXN1,BCL6,SMAD7,ARHGEF12,STARD13,RAD23A,ADAM8,DNAJC10,RANBP1,SIPA1L1,PRKACA,PLK1,TBC1D2B,NPC1,ZC3H12A,TBC1D10B,ATG4B,TBC1D14,GIT2,WAC,MDM2,FAM13A,SNX13,RHBDF1,NF1,NUB1,PAFAH1B1,ACAP2,RGS3,ARHGAP9,PTEN,IQGAP1,FBXW7,SRGAP2,NCOR1,TBCD,ARHGAP29,SGSM3,PHKG2,SEMA4D,TBC1D22A,TMED2,ARNT,NRBP2,ARHGEF7,ASAP1,RGS2,GSK3A,LONP2,CSNK1E,BNIP2,NTRK1,RAPGEF6,PABPC1 | 1.338035419 | 1.39E-02 |
| GO:1901576 | organic substance biosynthetic process | biological_process | FZD6,OBFC1,PBX2,KANK2,ACADVL,EIF2B4,GTF3C2,RAI1,IGF1R,PTS,TNRC6A,SIRT2,MYNN,TRNAU1AP,NOC2L,TARS,RAF1,ZNF131,RSC1A1,SFSWAP,CDK13,TAZ,SIN3B,CBX5,SUPT5H,SUPT20H,ST3GAL1,PWP1,BCL6,FUBP1,ZNF783,CMPK2,TBX2,MMS19,SHMT2,EEF2K,PLD1,VAPB,GPAA1,CUX1,PGS1,NUP98,EED,FMR1,SMPD4,SMAD7,MCF2L,HDAC6,EHMT1,ZNF496,NARS,LANCL2,PNKP,LEF1,GLS,PAX8,SUPT4H1,ZNF83,EMX2,RBPMS,XYLT1,ZSCAN31,XBP1,FDPS,PAM,HSD17B12,APITD1,MPDU1,UHMK1,USP47,ADAM8,POLR3E,GABPB1,PCGF6,EEF1A1,LHX4,CSNK2A1,IGBP1,UPF3A,NOD1,PRKACA,STAT2,PIGS,PLK1,ZNF446,PNPO,ASNS,PTGES2,UPF1,ZNF621,HDGF,FDXR,PPP5C,PIGG,PDXK,NPC1,CCNL1,CHD6,ZC3H12A,SLC11A2,FAM58A,CLN8,TBX18,PIGN,GCDH,LBX2,PCGF1,DR1,BCLAF1,ZNF721,ZNF397,JHDM1D,ZNF710,GIGYF2,WAC,ZNF142,FUBP3,RARS,ZNF540,ALDH18A1,FGFR1,HSF4,PAIP1,CAPRIN1,GTF3C1,NADSYN1,ADCY4,CELF1,PAF1,TAB2,SGK1,DPF2,CHKB,NADK,IDI1,RNF8,SEC31A,MDM2,PRKCH,PPM1F,ZNF595,TBP,YY1,INO80,GPAT2,GMEB2,MCFD2,PFDN5,CREB1,SRP9,FLII,RPRD1A,DDX58,RPL27,CCNL2,PTPRK,SERPINH1,NF1,ZEB1,EIF4B,IFITM3,ASCC2,RGMB,EBF1,RPL9,MED28,NPR1,ZNF3,RPS6KA5,NIPBL,ADSL,ALG6,ST3GAL4,BRD9,GCNT2,ZNF837,PKD2,RXRB,LMNA,RSL1D1,MITF,NOL8,RB1,PRMT5,MZF1,ZFPM2,TP53BP1,RNF168,ZNF865,SENP2,ISYNA1,EDEM2,GPCPD1,IL18,PUM2,STARD3,SUB1,CHMP1A,PDE8A,ZNF558,GALNT2,ZNF263,ZNF180,BICD1,ZNF276,NR1H3,GARS,GRB10,MRPS7,USP7,PLD6,FLCN,ZNF605,ZNF410,GMDS,RPL24,UST,MTMR14,RPL37A,SAP30BP,MAST2,VPS72,PTEN,ALDH1A3,RNASEK,RUNX2,CSTF1,FBXW7,SMARCD3,IKBKB,RQCD1,RFX7,NCOR1,PPP1R10,MEF2A,FECH,SETD8,SMEK1,NECAB3,PIAS2,SSBP1,MAPK8,MYCBP2,USP15,DDX41,MAN1A2,PBX3,ZNF565,ABCA2,AFF4,TRIM28,DMTF1,CDK5RAP2,PTPRC,OAZ1,IMPDH1,UBP1,WDR61,EBF4,FARSA,ZNF148,ZNF76,STAG2,SP110,PPA2,ST6GALNAC5,PHKG2,NCK2,TCF4,ACD,IKZF5,HMGN2,SEMA4D,SSBP2,ERC1,C3,NFYC,HSD17B4,ELOVL1,FUT4,PIWIL4,SRSF10,SS18,RCOR3,SMAD4,CHURC1,CHURC1-FNTB,ZNF114,MIER2,C1QTNF3,TGFB1I1,INO80E,DTYMK,RPL4,MTRR,MBOAT2,ZNF44,CREBZF,ING4,CD276,RBMS1,EIF3M,ZNF687,NR2C2,FHOD1,DNTTIP2,MRPL49,FLNA,IRF9,MGAT5,ATP5A1,GLI3,THNSL2,MAPK12,CCDC59,DCAF6,AK5,B4GALT4,ENG,SIRT7,ZSCAN5A,TCF12,ARNT,NOX4,ZNF692,EXT1,GAPDH,PHF1,MTRF1L,B3GAT3,STK36,WWP1,PHF12,TBCE,MED6,MDFI,CIRBP,ZNF554,CIZ1,RGS2,HINFP,NCBP2,MAN2A2,LPCAT1,MLX,PDGFRB,TGS1,CDK11A,MAN1B1,GLIS3,ELP6,BDP1,DBF4,CANX,RUNX1,MKNK2,SMARCA4,NAA16,LRPPRC,RPLP0,RAD54L2,ZNF518B,CRCP,ZNF90,ZNF638,PER3,CHTF8,GSK3A,SNRPE,POLG,ZNF383,MRPL3,POLR2J3,NCOR2,FPGS,SETD2,PCYT1A,PIGO,PPAP2A,PDIA3,IGF2,PTGIS,TROVE2,ATXN3,PSTK,PHF21A,GPHN,PDCD4,SOX13,PGM2,CHD2,STAT6,CARS2,ZNF138,ZNF705A,NTRK1,TFAM,PHKG1,BRWD1,SMAD9,LMF1,TGFBR3,ZBTB16,BAZ2A,SIRT3,UCK1,SPCS3,EIF3I,RRP8,VARS,LARS,PHF19,LMCD1,PKD1,PDPK1,TSG101,USF1,FOXC1,ACAN,CDK5RAP3,FMOD,ALG9,PABPC1,PANK3,EYA2,SMARCAD1,CC2D1A,PLA2G16,GATA2,PABPN1 | 1.087726619 | 1.41E-02 |
| GO:0004812 | aminoacyl-tRNA ligase activity | molecular_function | TARS,NARS,RARS,GARS,FARSA,CARS2,VARS,LARS | 2.455775064 | 1.43E-02 |
| GO:0016876 | ligase activity, forming aminoacyl-tRNA and related compounds | molecular_function | TARS,NARS,RARS,GARS,FARSA,CARS2,VARS,LARS | 2.455775064 | 1.43E-02 |
| GO:0016875 | ligase activity, forming carbon-oxygen bonds | molecular_function | TARS,NARS,RARS,GARS,FARSA,CARS2,VARS,LARS | 2.455775064 | 1.43E-02 |
| GO:0045934 | negative regulation of nucleobase-containing compound metabolic process | biological_process | KANK2,SIRT2,NOC2L,SFSWAP,SIN3B,CBX5,SUPT5H,BCL6,TBX2,CUX1,EED,SMAD7,HDAC6,EHMT1,ZNF496,LANCL2,LEF1,SUPT4H1,USP47,PCGF6,IGBP1,PLK1,HDGF,TBX18,DR1,BCLAF1,ZNF540,FGFR1,HSF4,PAF1,MDM2,PPM1F,YY1,PFDN5,CREB1,PTPRK,ZEB1,IFITM3,RPS6KA5,NIPBL,RB1,PRMT5,ZFPM2,CHMP1A,ZNF263,NR1H3,FLCN,VPS72,RUNX2,FBXW7,NCOR1,MEF2A,SETD8,TRIM28,UBP1,ZNF148,STAG2,TCF4,ACD,SEMA4D,SRSF10,SMAD4,CREBZF,ING4,GLI3,ENG,SIRT7,ERCC1,WWP1,PHF12,MDFI,HINFP,MLX,GLIS3,SMARCA4,PER3,GSK3A,NCOR2,PHF21A,PDCD4,STAT6,ZBTB16,BAZ2A,RRP8,LMCD1,TSG101,PABPC1,UBR5,CC2D1A,GATA2 | 1.253916158 | 1.43E-02 |
| GO:2000045 | regulation of G1/S transition of mitotic cell cycle | biological_process | KANK2,PSMB10,PSMB9,PTPN6,MDM2,INO80,PKD2,CASP2,SLFN11,PTEN,PSMC6,PSMC4,DGKZ,PSMA1 | 1.905220757 | 1.44E-02 |
| GO:0043393 | regulation of protein binding | biological_process | CRBN,LEF1,KRIT1,PLK1,FKBP1A,SENP2,NRP1,SMARCD3,HERPUD1,MEF2A,MAPK8,LRPAP1,TGFBR3,PKD1 | 1.905220757 | 1.44E-02 |
| GO:0030198 | extracellular matrix organization | biological_process | LEPRE1,COL9A1,COL2A1,DPP4,HSD17B12,COL16A1,COL14A1,MMP16,COL12A1,FKBP1A,SERPINH1,NF1,COL18A1,FAP,COL9A3,ABI3BP,P4HB,ENG,COL8A1,SMARCA4,COL13A1,MYO1E,PLOD2,FOXC1,ACAN | 1.588753832 | 1.44E-02 |
| GO:0012507 | ER to Golgi transport vesicle membrane | cellular_component | HLA-DPB1,HLA-C,HLA-DQA1,SEC31A,MCFD2,HLA-F,SEC31B | 2.647386335 | 1.45E-02 |
| GO:0042384 | cilium assembly | biological_process | TTLL3,BBS1,IFT172,RAB8A,WDR35,FLNA,STK36,DZIP1,CC2D2A,TMEM237,SEPT2,C2CD3 | 2.020894874 | 1.45E-02 |
| GO:0006892 | post-Golgi vesicle-mediated transport | biological_process | VAMP7,BBS1,SNAP23,RAB31,TXNDC5,GCC2,CSK,GOPC,RAB10,SCFD1,VAMP4,SCAMP1 | 2.020894874 | 1.45E-02 |
| GO:0005719 | nuclear euchromatin | cellular_component | TBP,CREB1,TRIM28,SMARCA4 | 3.998093649 | 1.46E-02 |
| GO:0009968 | negative regulation of signal transduction | biological_process | FZD6,KANK2,IGF1R,NPHP3,BCL6,PTPN22,SMAD7,GLG1,ARHGEF12,HGS,LEF1,PTPN6,IGBP1,TBX18,STK4,MDM2,PFDN5,SNX13,NF1,G3BP1,RB1,PAFAH1B1,BICD1,RGS3,NR1H3,GRB10,FLCN,PTEN,FYN,RUNX2,FBXW7,PHPT1,RQCD1,NCOR1,PIAS2,USP15,CSK,PTPRC,LEPROT,DGKZ,TGFB1I1,LRPAP1,GLI3,EPS15L1,EPN1,ENG,BICC1,ARHGEF7,UNC5B,MDFI,RGS2,STAM2,SMARCA4,ADRBK2,GSK3A,ANKRD6,PDCD4,SNX14,CRIPAK,CSNK1E,SPRED1,DUSP6,TGFBR3,PDPK1,GATA2 | 1.310959749 | 1.46E-02 |
| GO:0005964 | phosphorylase kinase complex | cellular_component | PHKG2,PHKG1 | 9.328885182 | 1.46E-02 |
| GO:0005594 | collagen type IX | cellular_component | COL9A1,COL9A3 | 9.328885182 | 1.46E-02 |
| GO:0031618 | nuclear centromeric heterochromatin | cellular_component | CBX5,NCAPD3 | 9.328885182 | 1.46E-02 |
| GO:0055087 | Ski complex | cellular_component | SKIV2L,WDR61 | 9.328885182 | 1.46E-02 |
| GO:0071598 | neuronal ribonucleoprotein granule | cellular_component | FMR1,UHMK1 | 9.328885182 | 1.46E-02 |
| GO:0071438 | invadopodium membrane | cellular_component | DPP4,FAP | 9.328885182 | 1.46E-02 |
| GO:0042594 | response to starvation | biological_process | TNRC6A,SUPT5H,HDAC6,ASNS,NPC1,ATG4B,TBC1D14,WAC,ATG12,ADSL,AACS,OXCT1,NRBP2,ATG3,RRP8 | 1.854031995 | 1.46E-02 |
| GO:0010648 | negative regulation of cell communication | biological_process | FZD6,KANK2,IGF1R,NPHP3,BCL6,PTPN22,SMAD7,GLG1,ARHGEF12,HGS,LEF1,PTPN6,IGBP1,NPC1,TBX18,STK4,MDM2,PFDN5,SNX13,NF1,G3BP1,RB1,PAFAH1B1,BICD1,RGS3,NR1H3,GRB10,PLK2,FLCN,PTEN,FYN,RUNX2,FBXW7,PHPT1,RQCD1,NCOR1,PIAS2,USP15,CSK,PTPRC,LEPROT,DGKZ,TGFB1I1,LRPAP1,GLI3,EPS15L1,EPN1,ENG,BICC1,NRBP2,ARHGEF7,UNC5B,MDFI,RGS2,STAM2,SMARCA4,ADRBK2,GSK3A,ANKRD6,PDCD4,SNX14,CRIPAK,CSNK1E,SPRED1,DUSP6,TGFBR3,PDPK1,GATA2 | 1.30133382 | 1.48E-02 |
| GO:0031593 | polyubiquitin binding | molecular_function | UBXN1,HDAC6,RAD23A,TAB2,SHARPIN,RNF168 | 2.894306325 | 1.49E-02 |
| GO:0005158 | insulin receptor binding | molecular_function | IGF1R,TLN2,GRB10,TLN1,IGF2,PDPK1 | 2.894306325 | 1.49E-02 |
| GO:0044389 | small conjugating protein ligase binding | molecular_function | FZD6,SPOP,UBXN1,SMAD7,PRKACA,DNM1L,HERC2,SNCAIP,PDE4D,RNF8,RB1,USP7,CUL4A,LTBR,TRIM28,TANK,TNFRSF14,ATXN3,TSG101 | 1.710856628 | 1.49E-02 |
| GO:0031625 | ubiquitin protein ligase binding | molecular_function | FZD6,SPOP,UBXN1,SMAD7,PRKACA,DNM1L,HERC2,SNCAIP,PDE4D,RNF8,RB1,USP7,CUL4A,LTBR,TRIM28,TANK,TNFRSF14,ATXN3,TSG101 | 1.710856628 | 1.49E-02 |
| GO:0060840 | artery development | biological_process | TBX2,SMAD7,NF1,PKD2,MYLK,GLI3,ENG,PDGFRB,FOXC1 | 2.287805518 | 1.52E-02 |
| GO:0019693 | ribose phosphate metabolic process | biological_process | CRBN,RAB3GAP2,DHX34,EIF2B4,MYO1D,RALGAPA2,RAF1,SEPT5,ATP2B1,RAB34,BCL6,GBP3,MCF2L,ARHGEF12,ATP6V1D,ARHGEF25,RGL4,STARD13,ABCC1,DDX23,DNAJC10,RAB35,RANBP1,SIPA1L1,DDX39A,KRIT1,SKIV2L,MINK1,RHOF,EEF1A1,DHX9,PDE7B,TBC1D2B,DNM1L,UPF1,HERC2,CHD6,TBC1D10B,SEPT4,EFTUD2,TBC1D14,TNK2,GIT2,MTG1,RAB18,PMS1,ADCY4,PDE4D,PLEKHG4,NADK,FAM13A,INO80,RALGPS2,PLEKHG5,DDX58,SNX13,NF1,RTKN,NPR1,G3BP1,RAB31,ADSL,PKD2,GNAI1,PAFAH1B1,PDE8A,DDX6,ACAP2,RGS3,CYTH2,FLCN,ARHGAP9,IQGAP1,CTNS,SRGAP2,ATP11B,DDX41,RNF213,ABCA2,DENND4C,MAP4K4,ITPA,PSMC6,TBCD,IMPDH1,SKIV2L2,PSMC4,ARHGAP29,SGSM3,GOPC,RHEB,SEMA4D,GNB3,GRPEL2,TBC1D22A,RAB5A,ATP5A1,TMED2,RASGRF2,AK5,ATP8B2,ARHGEF7,ASAP1,RGS2,RAD51B,FARP1,RAP1B,SMARCA4,DHX40,DOCK8,LONRF3,GSK3A,MYO1E,RGL2,CHD2,LONP2,ACIN1,PSD3,BNIP2,NTRK1,UCK1,DHX37,RAPGEF6,PANK3,DENND6B | 1.203773454 | 1.52E-02 |
| GO:0043062 | extracellular structure organization | biological_process | LEPRE1,COL9A1,COL2A1,DPP4,HSD17B12,COL16A1,COL14A1,MMP16,COL12A1,FKBP1A,SERPINH1,NF1,COL18A1,FAP,COL9A3,ABI3BP,P4HB,ENG,COL8A1,SMARCA4,COL13A1,MYO1E,PLOD2,FOXC1,ACAN | 1.581294894 | 1.52E-02 |
| GO:0005905 | coated pit | cellular_component | RAB35,TNK2,REPS1,CLTCL1,CLTB,AAK1,EPS15L1,EPN1,LRP3 | 2.289817272 | 1.52E-02 |
| GO:0031410 | cytoplasmic vesicle | cellular_component | CADM1,SEPT5,BDNF,CPE,RAB34,HLA-DPB1,DPP4,HGS,IL15RA,SYTL4,HLA-C,YIPF1,ADAMTS1,RGL4,PAM,HLA-DQA1,AP3S2,ADAM8,RAB35,CD9,SLC11A2,CNP,VAMP7,CAMK2D,TNK2,FLG,VTI1A,FGFR1,HPS4,SEC31A,MDM2,SNAP23,MCFD2,SNX21,RAB31,GNAI1,BLOC1S5,TPP1,SYTL2,EPN2,ADAM15,BICD1,GARS,NRP1,STX2,SNX17,GGNBP2,SRGAP2,ITGB5,CLTCL1,HLA-F,ABCA2,RAB8A,DENND4C,CLTB,FLOT1,AAK1,GOPC,RAB10,CTSH,ATP6V0A1,P4HB,TMED3,CLK3,RAB5A,TMED2,VEZT,SCFD1,PDGFRB,VPS51,CANX,PTPN23,CRCP,PDIA3,MYO1E,CORO7,DPP7,CLIC4,NTRK1,CTTNBP2,SEC31B,ZDHHC8,PDPK1,CD63 | 1.262555889 | 1.53E-02 |
| GO:0001701 | in utero embryonic development | biological_process | PLCD1,LEF1,BCL2L11,JAG2,STK4,FGFR1,PKD2,RXRB,MAPK8IP3,ZFPM2,EPN2,FLCN,TCTN1,TRIM28,RARRES2,PSMC4,SMAD4,GLI3,TMED2,EPN1,ARNT,MDFI,HINFP,PDGFRB,RUNX1,SMARCA4,NCOR2,SETD2,MYO1E,BNIP2,TGFBR3,EGFL8,PKD1,FOXC1,C2CD3,GATA2 | 1.452140029 | 1.53E-02 |
| GO:0000278 | mitotic cell cycle | biological_process | CDK14,KANK2,PSMB10,SIRT2,CDK13,BCL6,NUP98,PSMB9,CEP135,APITD1,USP47,RANBP1,PTPN6,CSNK2A1,PRKACA,ANAPC4,PLK1,SDCCAG8,ASNS,PPP5C,CAMK2D,GIGYF2,PAF1,RNF8,MDM2,ANAPC16,INO80,NEK3,NUMA1,NIPBL,PKD2,CASP2,RB1,PRMT5,USP3,PAFAH1B1,SLFN11,CHMP1A,PLK2,CUL4A,CHFR,PTEN,SETD8,CLTCL1,CDK5RAP2,PSMC6,DSN1,CDK6,NUP37,PSMC4,STAG2,DGKZ,CENPT,CDCA3,FLNA,SUN2,SIRT7,NUP85,HAUS5,HINFP,PDGFRB,NCAPD3,CDK11A,DBF4,SMARCA4,IGF2,DYNC1I2,MAU2,PSMA1,CSNK1E,SEPT2,PKD1,FOXC1,CLASP1,GORASP1 | 1.280668488 | 1.54E-02 |
| GO:0031512 | motile primary cilium | cellular_component | PKD2,PAFAH1B1,PKD1 | 5.247497915 | 1.55E-02 |
| GO:0004449 | isocitrate dehydrogenase (NAD+) activity | molecular_function | IDH3G,IDH3B | 9.004508566 | 1.56E-02 |
| GO:0016838 | carbon-oxygen lyase activity, acting on phosphates | molecular_function | PTS,THNSL2 | 9.004508566 | 1.56E-02 |
| GO:0016842 | amidine-lyase activity | molecular_function | PAM,ADSL | 9.004508566 | 1.56E-02 |
| GO:0010997 | anaphase-promoting complex binding | molecular_function | PLK1,PTEN | 9.004508566 | 1.56E-02 |
| GO:0048285 | organelle fission | biological_process | SIRT2,CDK13,MARCH5,NUP98,APITD1,RANBP1,ANAPC4,PLK1,DNM1L,PPP5C,RNF8,ANAPC16,INO80,NEK3,NUMA1,NIPBL,RB1,PRMT5,PAFAH1B1,CHMP1A,CHFR,PTEN,SETD8,CLTCL1,DSN1,NUP37,STAG2,CENPT,CDCA3,FLNA,NUP85,HAUS5,PDGFRB,NCAPD3,CDK11A,IGF2,MAU2,ATG3,SEPT2,CLASP1,GORASP1 | 1.412731284 | 1.56E-02 |
| GO:0042816 | vitamin B6 metabolic process | biological_process | PNPO,PDXK | 8.981754996 | 1.57E-02 |
| GO:0035166 | post-embryonic hemopoiesis | biological_process | ERCC1,MYO1E | 8.981754996 | 1.57E-02 |
| GO:0007181 | transforming growth factor beta receptor complex assembly | biological_process | TGFBR3,FMOD | 8.981754996 | 1.57E-02 |
| GO:0036093 | germ cell proliferation | biological_process | RHBDD1,IL18 | 8.981754996 | 1.57E-02 |
| GO:0042997 | negative regulation of Golgi to plasma membrane protein transport | biological_process | CSK,GOPC | 8.981754996 | 1.57E-02 |
| GO:0009196 | pyrimidine deoxyribonucleoside diphosphate metabolic process | biological_process | CMPK2,DTYMK | 8.981754996 | 1.57E-02 |
| GO:0009227 | nucleotide-sugar catabolic process | biological_process | GALT,GSK3A | 8.981754996 | 1.57E-02 |
| GO:0002176 | male germ cell proliferation | biological_process | RHBDD1,IL18 | 8.981754996 | 1.57E-02 |
| GO:0010716 | negative regulation of extracellular matrix disassembly | biological_process | DPP4,FAP | 8.981754996 | 1.57E-02 |
| GO:0051599 | response to hydrostatic pressure | biological_process | PKD2,NTRK1 | 8.981754996 | 1.57E-02 |
| GO:0090292 | nuclear matrix anchoring at nuclear membrane | biological_process | SYNE1,SUN2 | 8.981754996 | 1.57E-02 |
| GO:0090188 | negative regulation of pancreatic juice secretion | biological_process | NR1H3,WNK1 | 8.981754996 | 1.57E-02 |
| GO:0061087 | positive regulation of histone H3-K27 methylation | biological_process | PHF1,PHF19 | 8.981754996 | 1.57E-02 |
| GO:0036297 | interstrand cross-link repair | biological_process | RNF8,RNF168 | 8.981754996 | 1.57E-02 |
| GO:0007521 | muscle cell fate determination | biological_process | TBX2,MEF2A | 8.981754996 | 1.57E-02 |
| GO:0090230 | regulation of centromere complex assembly | biological_process | RB1,SENP6 | 8.981754996 | 1.57E-02 |
| GO:0035441 | cell migration involved in vasculogenesis | biological_process | PDGFRB,SETD2 | 8.981754996 | 1.57E-02 |
| GO:0009197 | pyrimidine deoxyribonucleoside diphosphate biosynthetic process | biological_process | CMPK2,DTYMK | 8.981754996 | 1.57E-02 |
| GO:0002378 | immunoglobulin biosynthetic process | biological_process | GALNT2,PTPRC | 8.981754996 | 1.57E-02 |
| GO:0009139 | pyrimidine nucleoside diphosphate biosynthetic process | biological_process | CMPK2,DTYMK | 8.981754996 | 1.57E-02 |
| GO:0044429 | mitochondrial part | cellular_component | SLC25A37,ACADVL,RAF1,TAZ,MARCH5,SHMT2,NLN,PGS1,SLC9B2,VRK2,GLS,BCL2L13,BCL2L11,STARD13,TTC19,DNM1L,FDXR,HERC2,CNP,GCDH,ALDH18A1,TIMM23,CPT1B,IDH3G,GPAT2,ALDH6A1,DHRS1,MTCH1,GARS,PLD6,SRGAP2,OXCT1,FECH,ERAL1,COX7A2L,SSBP1,COX14,PPA2,TIMM50,GRPEL2,DTYMK,GOLPH3,DLST,MRPL49,CA5B,BCS1L,ATP5A1,NDUFV1,NDUFS2,ETFA,SLC25A6,SDHA,IDH3B,DIABLO,LETMD1,LRPPRC,POLG,MRPL3,FPGS,SFXN3,D2HGDH,ATXN3,CARS2,SLC25A24,TFAM,SLC25A46,SIRT3,LETM1,UQCRH,BCL2L2 | 1.292259821 | 1.59E-02 |
| GO:0030139 | endocytic vesicle | cellular_component | RAB34,HLA-DPB1,DPP4,HLA-C,HLA-DQA1,ADAM8,RAB35,VAMP7,CAMK2D,MDM2,RAB31,EPN2,SRGAP2,ITGB5,HLA-F,RAB8A,RAB10,ATP6V0A1,RAB5A,MYO1E | 1.675847638 | 1.59E-02 |
| GO:0004721 | phosphoprotein phosphatase activity | molecular_function | PTPN22,PTPN6,CSNK2A1,IGBP1,PPP5C,FKBP1A,PPM1F,SSH2,PTPRK,MDP1,TENC1,MTMR14,PTEN,PHPT1,PTP4A2,PTPRF,PPP1R10,PTPRS,PTPRC,TIMM50,CDC14B,PTPRD,PDGFRB,PTPN4,PTPN23,DUSP6,SSH1,EYA2 | 1.531131011 | 1.59E-02 |
| GO:0009893 | positive regulation of metabolic process | biological_process | OBFC1,PBX2,ACADVL,PSMB10,IGF1R,EPHX2,RAF1,SUPT5H,FUBP1,MMS19,ZFP91,CNTF,VAPB,SMAD7,MCF2L,HDAC6,ZNF496,LEF1,PAX8,SUPT4H1,PSMB9,RBPMS,XBP1,APITD1,UHMK1,ADAM8,GABPB1,CSNK2A1,IGBP1,UPF3A,NOD1,PRKACA,ANAPC4,PLK1,ASNS,PTGES2,HDGF,ZC3H12A,SEPT4,SYMPK,ATG4B,BCLAF1,JHDM1D,TNK2,WAC,STK4,FUBP3,FGFR1,HSF4,PAIP1,ADCY4,PAF1,TAB2,RNF8,SEC31A,MDM2,RHBDD1,FKBP1A,PPM1F,TBP,INO80,CREB1,NPTN,DDX58,NF1,ZEB1,NUB1,RGMB,EBF1,NPR1,RPS6KA5,NIPBL,PKD2,RXRB,LMNA,MITF,RB1,MAPK8IP3,ZFPM2,TP53BP1,RNF168,SENP2,IL18,TPP1,NR1H3,GRB10,FLCN,NRP1,PTEN,RUNX2,IQGAP1,FBXW7,SMARCD3,HERPUD1,IKBKB,PXN,NCOR1,MEF2A,SMEK1,PIAS2,MAPK8,DDX41,TRIM28,CSK,CDK5RAP2,PTPRC,PSMC6,CDK6,WDR61,ZNF148,PSMC4,SGSM3,PHKG2,PAK1,NCK2,CTSH,TCF4,SEMA4D,CSF1R,C3,NFYC,SS18,SMAD4,CHURC1,CHURC1-FNTB,TGFB1I1,DDAH1,CD276,CDC14B,NR2C2,FHOD1,GLI3,TMED2,DCAF6,ENG,SIRT7,TCF12,ARNT,NOX4,PHF1,PDIA5,MED6,MDFI,CIRBP,CIZ1,ITGA5,HINFP,NCBP2,LPCAT1,MLX,PDGFRB,GLIS3,CARD14,TNFRSF14,RUNX1,SMARCA4,NAA16,YIF1A,TLN1,GSK3A,IGF2,PSMA1,STAT6,CSNK1E,NTRK1,TFAM,TNFRSF10B,SMAD9,HBB,ZBTB16,PHF19,PKD1,PDPK1,USF1,FOXC1,DDAH2,CDK5RAP3,PABPC1,SMARCAD1,GATA2 | 1.159213121 | 1.62E-02 |
| GO:0045892 | negative regulation of transcription, DNA-dependent | biological_process | KANK2,SIRT2,NOC2L,SIN3B,CBX5,SUPT5H,BCL6,TBX2,CUX1,EED,SMAD7,HDAC6,EHMT1,ZNF496,LANCL2,LEF1,SUPT4H1,USP47,PCGF6,IGBP1,PLK1,HDGF,TBX18,DR1,BCLAF1,ZNF540,FGFR1,HSF4,PAF1,MDM2,PPM1F,YY1,PFDN5,CREB1,PTPRK,ZEB1,RPS6KA5,NIPBL,RB1,PRMT5,ZFPM2,CHMP1A,ZNF263,NR1H3,FLCN,VPS72,RUNX2,NCOR1,MEF2A,SETD8,TRIM28,UBP1,ZNF148,TCF4,SEMA4D,SMAD4,CREBZF,ING4,GLI3,ENG,SIRT7,WWP1,PHF12,MDFI,HINFP,MLX,GLIS3,SMARCA4,PER3,NCOR2,PHF21A,PDCD4,STAT6,ZBTB16,BAZ2A,RRP8,LMCD1,TSG101,CC2D1A,GATA2 | 1.266522444 | 1.62E-02 |
| GO:0006184 | GTP catabolic process | biological_process | RAB3GAP2,EIF2B4,RALGAPA2,SEPT5,RAB34,BCL6,GBP3,MCF2L,ARHGEF12,ARHGEF25,RGL4,STARD13,RAB35,RANBP1,SIPA1L1,KRIT1,MINK1,RHOF,EEF1A1,TBC1D2B,DNM1L,HERC2,TBC1D10B,SEPT4,EFTUD2,TBC1D14,TNK2,GIT2,MTG1,RAB18,PLEKHG4,FAM13A,RALGPS2,PLEKHG5,SNX13,NF1,RTKN,RAB31,GNAI1,PAFAH1B1,ACAP2,RGS3,CYTH2,ARHGAP9,IQGAP1,SRGAP2,DENND4C,MAP4K4,TBCD,ARHGAP29,SGSM3,GOPC,RHEB,SEMA4D,GNB3,TBC1D22A,RAB5A,TMED2,RASGRF2,ARHGEF7,ASAP1,RGS2,FARP1,RAP1B,DOCK8,RGL2,PSD3,BNIP2,NTRK1,RAPGEF6,DENND6B | 1.287425178 | 1.62E-02 |
| GO:0009896 | positive regulation of catabolic process | biological_process | SUPT5H,SMAD7,ADAM8,CSNK2A1,PLK1,ZC3H12A,ATG4B,WAC,MDM2,RHBDD1,NUB1,PTEN,SGSM3,PHKG2,ARNT,LPCAT1,GSK3A,CSNK1E,PABPC1 | 1.695231903 | 1.63E-02 |
| GO:0004659 | prenyltransferase activity | molecular_function | FDPS,RABGGTA,FNTB,RABGGTB | 3.8590751 | 1.64E-02 |
| GO:0042043 | neurexin family protein binding | molecular_function | CPE,SYTL4,SYTL2,NLGN2 | 3.8590751 | 1.64E-02 |
| GO:0031418 | L-ascorbic acid binding | molecular_function | LEPRE1,PAM,ALKBH3,OGFOD3,PLOD2 | 3.215895917 | 1.65E-02 |
| GO:0034314 | Arp2/3 complex-mediated actin nucleation | biological_process | ARPC4-TTLL3,ACTR3,WASH4P,ACTR2 | 3.84932357 | 1.66E-02 |
| GO:0016568 | chromatin modification | biological_process | SIRT2,NOC2L,SUPT5H,EED,HDAC6,EHMT1,LEF1,SUPT4H1,CHD6,PCGF1,DR1,JHDM1D,WAC,HSF4,PAF1,RNF8,INO80,PHF15,RPS6KA5,NIPBL,BRD9,RB1,PRMT5,USP3,RNF168,FLCN,VPS72,SMARCD3,NCOR1,SETD8,MAPK8,WDR61,ING4,MSL1,SIRT7,PHF1,SMARCA4,SETD2,KANSL3,ATXN3,PHF21A,BAZ2A,RRP8,PHF19,UBR5,EYA2,SMARCAD1,GATA2 | 1.367201606 | 1.66E-02 |
| GO:0048745 | smooth muscle tissue development | biological_process | NF1,PKD2,MYLK,ENG,PDGFRB | 3.207769641 | 1.67E-02 |
| GO:0009058 | biosynthetic process | biological_process | FZD6,OBFC1,PBX2,KANK2,ACADVL,EIF2B4,GTF3C2,RAI1,IGF1R,PTS,TNRC6A,SIRT2,MYNN,TRNAU1AP,NOC2L,TARS,RAF1,ZNF131,RSC1A1,SFSWAP,CDK13,TAZ,SIN3B,CBX5,SUPT5H,SUPT20H,ST3GAL1,PWP1,BCL6,FUBP1,ZNF783,CMPK2,TBX2,MMS19,SHMT2,EEF2K,PLD1,VAPB,GPAA1,CUX1,PGS1,NUP98,EED,FMR1,SMPD4,SMAD7,MCF2L,HDAC6,EHMT1,ZNF496,NARS,LANCL2,PNKP,LEF1,GLS,PAX8,SUPT4H1,ZNF83,EMX2,RBPMS,XYLT1,ZSCAN31,XBP1,FDPS,PAM,HSD17B12,APITD1,MPDU1,UHMK1,USP47,ADAM8,POLR3E,GABPB1,PCGF6,EEF1A1,LHX4,CSNK2A1,IGBP1,UPF3A,NOD1,PRKACA,STAT2,PIGS,PLK1,ZNF446,PNPO,ASNS,PTGES2,UPF1,ZNF621,HDGF,FDXR,PPP5C,PIGG,PDXK,NPC1,CCNL1,CHD6,ZC3H12A,SLC11A2,FAM58A,CLN8,TBX18,PIGN,GCDH,LBX2,PCGF1,DR1,BCLAF1,ZNF721,ZNF397,JHDM1D,ZNF710,GIGYF2,WAC,ZNF142,FUBP3,RARS,ZNF540,ALDH18A1,FGFR1,HSF4,PAIP1,CAPRIN1,GTF3C1,NADSYN1,ADCY4,CELF1,PAF1,TAB2,SGK1,DPF2,CHKB,NADK,IDI1,RNF8,SEC31A,MDM2,PRKCH,PPM1F,ZNF595,TBP,YY1,INO80,GPAT2,GMEB2,MCFD2,PFDN5,CREB1,SRP9,FLII,RPRD1A,DDX58,RPL27,CCNL2,PTPRK,SERPINH1,NF1,ZEB1,EIF4B,IFITM3,ASCC2,RGMB,EBF1,RPL9,MED28,NPR1,ZNF3,RPS6KA5,NIPBL,ADSL,ALG6,ST3GAL4,BRD9,GCNT2,ZNF837,PKD2,RXRB,LMNA,RSL1D1,MITF,NOL8,RB1,PRMT5,MZF1,ZFPM2,TP53BP1,RNF168,ZNF865,SENP2,ISYNA1,EDEM2,GPCPD1,IL18,PUM2,STARD3,SUB1,CHMP1A,PDE8A,ZNF558,GALNT2,ZNF263,ZNF180,BICD1,ZNF276,NR1H3,GARS,GRB10,MRPS7,USP7,PLD6,FLCN,ZNF605,ZNF410,GMDS,RPL24,UST,MTMR14,RPL37A,SAP30BP,MAST2,VPS72,PTEN,ALDH1A3,RNASEK,RUNX2,CSTF1,FBXW7,SMARCD3,IKBKB,RQCD1,RFX7,NCOR1,PPP1R10,MEF2A,FECH,SETD8,SMEK1,NECAB3,PIAS2,SSBP1,MAPK8,MYCBP2,USP15,DDX41,MAN1A2,PBX3,ZNF565,ABCA2,AFF4,TRIM28,DMTF1,CDK5RAP2,PTPRC,OAZ1,IMPDH1,UBP1,WDR61,EBF4,FARSA,ZNF148,ZNF76,STAG2,SP110,PPA2,ST6GALNAC5,PHKG2,NCK2,TCF4,ACD,IKZF5,HMGN2,SEMA4D,SSBP2,ERC1,C3,NFYC,HSD17B4,ELOVL1,FUT4,PIWIL4,SRSF10,SS18,RCOR3,SMAD4,CHURC1,CHURC1-FNTB,ZNF114,MIER2,C1QTNF3,TGFB1I1,DDAH1,INO80E,DTYMK,RPL4,MTRR,MBOAT2,ZNF44,CREBZF,ING4,CD276,RBMS1,EIF3M,ZNF687,NR2C2,FHOD1,DNTTIP2,MRPL49,FLNA,IRF9,MGAT5,ATP5A1,GLI3,THNSL2,MAPK12,CCDC59,DCAF6,AK5,B4GALT4,ENG,SIRT7,ZSCAN5A,TCF12,ARNT,NOX4,ZNF692,EXT1,GAPDH,PHF1,MTRF1L,B3GAT3,STK36,WWP1,PHF12,TBCE,MED6,MDFI,CIRBP,ZNF554,NUBP1,CIZ1,RGS2,HINFP,NCBP2,MAN2A2,LPCAT1,MLX,PDGFRB,TGS1,CDK11A,MAN1B1,GLIS3,ELP6,BDP1,DBF4,CANX,RUNX1,MKNK2,SMARCA4,NAA16,LRPPRC,RPLP0,RAD54L2,ZNF518B,CRCP,ZNF90,ZNF638,PER3,CHTF8,GSK3A,SNRPE,POLG,ZNF383,MRPL3,POLR2J3,NCOR2,FPGS,SETD2,PCYT1A,PIGO,PPAP2A,PDIA3,IGF2,PTGIS,TROVE2,ATXN3,PSTK,PHF21A,GPHN,PDCD4,SOX13,PGM2,CHD2,STAT6,CARS2,ZNF138,ZNF705A,NTRK1,TFAM,PHKG1,BRWD1,SMAD9,HBB,LMF1,TGFBR3,ZBTB16,BAZ2A,SIRT3,UCK1,SPCS3,EIF3I,RRP8,VARS,LARS,PHF19,LMCD1,PKD1,PDPK1,TSG101,USF1,FOXC1,DDAH2,ACAN,CDK5RAP3,FMOD,ALG9,PABPC1,PANK3,EYA2,SMARCAD1,CC2D1A,PLA2G16,GATA2,PABPN1 | 1.084205915 | 1.67E-02 |
| GO:0003208 | cardiac ventricle morphogenesis | biological_process | CPE,SMAD7,FKBP1A,ZFPM2,SMARCD3,MEF2A,GAA,GSK3A,TGFBR3,FOXC1 | 2.138513094 | 1.70E-02 |
| GO:0016853 | isomerase activity | molecular_function | EIF2B4,PPIL2,ENOSF1,SPATA20,PTGES2,IDI1,FKBP1A,QSOX1,FKBP10,TXNDC5,ISYNA1,P4HB,HSD17B4,RPUSD4,PDIA5,EBPL,PDIA3,PTGIS,PGM2 | 1.688345356 | 1.70E-02 |
| GO:0044440 | endosomal part | cellular_component | HLA-DPB1,PLD1,HGS,HLA-C,HLA-DQA1,VPS52,NPC1,SLC11A2,VAMP7,HLA-DMB,TPCN2,TAB2,SNX13,IFITM3,STARD3,CHMP1A,ATP11B,WASH4P,HLA-F,ABCA2,APPL2,LEPROT,RAB10,VPS45,ATP6V0A1,RAB5A,SUN2,MCOLN1,STAM2,CD164,NTRK1,TSG101,CD63,SCAMP1 | 1.459426823 | 1.70E-02 |
| GO:0031669 | cellular response to nutrient levels | biological_process | TNRC6A,SUPT5H,HDAC6,ASNS,NPC1,ATG4B,TBC1D14,WAC,MDM2,ATG12,CHMP1A,NRBP2,ATG3,RRP8,USF1 | 1.820626013 | 1.71E-02 |
| GO:0004571 | mannosyl-oligosaccharide 1,2-alpha-mannosidase activity | molecular_function | EDEM2,MAN1A2,MAN1B1 | 5.065036069 | 1.71E-02 |
| GO:0008318 | protein prenyltransferase activity | molecular_function | RABGGTA,FNTB,RABGGTB | 5.065036069 | 1.71E-02 |
| GO:0070734 | histone H3-K27 methylation | biological_process | EHMT1,PHF1,PHF19 | 5.052237185 | 1.72E-02 |
| GO:0072205 | metanephric collecting duct development | biological_process | PAX8,PKD2,PKD1 | 5.052237185 | 1.72E-02 |
[truncated: 1,127,167 more chars]
