# Supplementary material for: Genome-Wide Identification of Long Noncoding RNAs in Human Intervertebral Disc Degeneration by RNA Sequencing
Source: Hindawi journal article supplement (doi:10.1155/2016/3684875), 2016-01-01
Supplement: f9 [file 3684875.f9.docx]

| **KEGG ID** | **KEGG Name** | **KEGG Class** | **Symbols within list** | **Enrichment Score** | **P-value** |
| --- | --- | --- | --- | --- | --- |
| hsa04142 | Lysosome | Transport and catabolism | AP3S2,NPC1,SLC11A2,AP4B1,TPP1,HEXA,LGMN,CTNS,CLTCL1,ABCA2,CLTB,CTSH,ATP6V0A1,HGSNAT,GUSB,MCOLN1,GAA,CD164,PPT2,CD63 | 2.156079235 | 0.000646541 |
| hsa03013 | RNA transport | Translation | EIF2B4,CLNS1A,NUP98,FMR1,EEF1A1,UPF3A,RPP14,UPF1,NUP210,PAIP1,EIF4B,PRMT5,SENP2,KPNB1,NUP37,THOC2,NUP85,NCBP2,TGS1,ACIN1,EIF3I,PABPC1 | 1.836144897 | 0.002911631 |
| hsa00970 | Aminoacyl-tRNA biosynthesis | Translation | TARS,NARS,RARS,GARS,FARSA,PSTK,CARS2,VARS,LARS | 2.839714114 | 0.003312533 |
| hsa04130 | SNARE interactions in vesicular transport | Folding, sorting and degradation | VAMP7,VTI1A,SNAP23,STX16,STX2,STX18,VTI1B,VAMP4 | 2.956908665 | 0.004272857 |
| hsa04144 | Endocytosis | Transport and catabolism | IGF1R,PLD1,SMAD7,HGS,HLA-C,GIT2,MDM2,RAB31,EPN2,ACAP2,CLTCL1,HLA-F,CLTB,PARD6G,VPS45,CSF1R,RAB5A,EPN1,WWP1,ASAP1,STAM2,ADRBK2,PSD3,NTRK1,TSG101 | 1.609014354 | 0.008319348 |
| hsa01100 | Metabolic pathways | Metabolism | ACADVL,CKB,PTS,EPHX2,PLCD1,ST3GAL1,CMPK2,SHMT2,PLD1,GPAA1,PGS1,AMT,SMPD4,ATP6V1D,H6PD,DGKA,GLS,XYLT1,FDPS,HSD17B12,PIGS,PNPO,ASNS,PTGES2,PDXK,PIGN,GCDH,PLCB4,GALK2,ALDH18A1,NADSYN1,CHKB,NADK,IDI1,CYP2R1,IDH3G,GPAT2,ALDH6A1,ACAA1,ADSL,ALG6,ST3GAL4,GCNT2,NTPCR,GALT,PAFAH1B1,ISYNA1,GALNT2,HEXA,GMDS,ALDH1A3,IDH1,FECH,MAN1A2,ITPA,IMPDH1,ST6GALNAC5,ATP6V0A1,DGKZ,ALDH3B1,HSD17B4,FUT4,DTYMK,MBOAT2,DLST,HGSNAT,MGAT5,ATP5A1,NDUFV1,NDUFS2,AK5,GUSB,B4GALT4,EXT1,GAPDH,GAA,B3GAT3,SDHA,IDH3B,MAN2A2,LPCAT1,MAN1B1,POLG,POLR2J3,FPGS,PCYT1A,PIGO,PPAP2A,PTGIS,PGM2,UCK1,PPT2,UQCRH,ALG9,PANK3,PLA2G16 | 1.062362395 | 0.010929878 |
| hsa04141 | Protein processing in endoplasmic reticulum | Folding, sorting and degradation | DERL2,XBP1,RAD23A,DNAJC10,MARCH6,LMAN2,SEC31A,TXNDC5,EDEM2,HERPUD1,MAPK8,MAN1A2,NSFL1C,OS9,P4HB,MAN1B1,CANX,PDIA3,ATXN3,AMFR,SEC31B | 1.63654207 | 0.013045602 |
| hsa05414 | Dilated cardiomyopathy | Cardiovascular diseases | ITGA9,PRKACA,ADCY4,TPM4,LMNA,ITGA3,ITGB5,CACNB1,ITGA5,ITGA11,CACNB3,CACNA2D1,CACNA2D4 | 1.868602004 | 0.018399205 |
| hsa05412 | Arrhythmogenic right ventricular cardiomyopathy (ARVC) | Cardiovascular diseases | LEF1,ITGA9,LMNA,ITGA3,ITGB5,CACNB1,ITGA5,ITGA11,CACNB3,CACNA2D1,CACNA2D4 | 1.922989588 | 0.024118145 |
| hsa05120 | Epithelial cell signaling in Helicobacter pylori infection | Infectious diseases: Bacterial | F11R,ATP6V1D,NOD1,JAM2,IKBKB,MAPK8,CSK,PAK1,ATP6V0A1,MAPK12 | 1.930817225 | 0.030143753 |
| hsa04145 | Phagosome | Transport and catabolism | HLA-DPB1,ATP6V1D,DYNC1I1,HGS,HLA-C,HLA-DQA1,HLA-DMB,THBS3,C1R,ITGB5,HLA-F,STX18,ATP6V0A1,C3,RAB5A,ITGA5,CANX,DYNC1I2 | 1.562795687 | 0.031787877 |
| hsa04510 | Focal adhesion | Cell communication | IGF1R,LAMB1,RAF1,COL2A1,ITGA9,VASP,TLN2,THBS3,ITGA3,PTEN,FYN,PXN,ITGB5,MAPK8,MYLK,PAK1,FLNA,ITGA5,PDGFRB,RAP1B,TLN1,ITGA11,PDPK1 | 1.451409436 | 0.03331665 |
| hsa03015 | mRNA surveillance pathway | Translation | UPF3A,UPF1,SYMPK,DAZAP1,PPP2R3C,CSTF1,FIP1L1,NCBP2,ACIN1,PABPC1,BCL2L2-PABPN1,PABPN1 | 1.744243875 | 0.037091674 |
| hsa00563 | Glycosylphosphatidylinositol(GPI)-anchor biosynthesis | Glycan biosynthesis and metabolism | GPAA1,PIGS,PIGG,PIGN,PIGO | 2.587295082 | 0.039030056 |
| hsa05218 | Melanoma | Cancers: Specific types | IGF1R,RAF1,FGFR1,MDM2,MITF,RB1,PTEN,CDK6,PDGFRB,FGF14 | 1.848067916 | 0.039241784 |
| hsa04612 | Antigen processing and presentation | Immune system | HLA-DPB1,HLA-C,HLA-DQA1,HLA-DMB,CREB1,LGMN,HLA-F,NFYC,CANX,PDIA3 | 1.848067916 | 0.039241784 |
| hsa04010 | MAPK signaling pathway | Signal transduction | RAF1,BDNF,PRKACA,PPP5C,STK4,FGFR1,TAB2,NF1,RPS6KA5,MAPK8IP3,IKBKB,CACNB1,MAPK8,MAP4K4,PAK1,FLNA,MAPK12,RASGRF2,PDGFRB,RAP1B,MKNK2,FGF14,CACNB3,NTRK1,CACNA2D1,DUSP6,CACNA2D4 | 1.369744455 | 0.039482767 |
| hsa00564 | Glycerophospholipid metabolism | Lipid metabolism | TAZ,PLD1,PGS1,DGKA,CHKB,GPAT2,DGKZ,MBOAT2,LPCAT1,PCYT1A,PPAP2A,PLA2G16 | 1.705908845 | 0.042909888 |
| hsa05410 | Hypertrophic cardiomyopathy (HCM) | Cardiovascular diseases | ITGA9,TPM4,LMNA,ITGA3,ITGB5,CACNB1,ITGA5,ITGA11,CACNB3,CACNA2D1,CACNA2D4 | 1.714472645 | 0.049997377 |
| hsa05150 | Staphylococcus aureus infection | Infectious diseases: Bacterial | HLA-DPB1,HLA-DQA1,HLA-DMB,C2,CFB,C1R,C3,C1S | 1.881669151 | 0.056856858 |
| hsa03040 | Spliceosome | Transcription | SART1,RBM17,SNRNP70,DDX23,PRPF40A,EFTUD2,PRPF3,SF3A2,HNRNPA3,PRPF8,SRSF10,THOC2,NCBP2,SNRPE,ACIN1 | 1.527930167 | 0.05686232 |
| hsa04514 | Cell adhesion molecules (CAMs) | Signaling molecules and interaction | CADM1,F11R,HLA-DPB1,GLG1,HLA-C,ITGA9,HLA-DQA1,HLA-DMB,JAM2,ESAM,PTPRF,HLA-F,PTPRC,CD276,NLGN2,MPZL1 | 1.457631032 | 0.070136175 |
| hsa05169 | Epstein-Barr virus infection | Infectious diseases: Viral | HLA-DPB1,HLA-C,HLA-DQA1,POLR3E,CSNK2A1,PRKACA,TAB2,MDM2,TBP,DDX58,RB1,USP7,IKBKB,MAPK8,HLA-F,PSMC6,PSMC4,IL10RA,MAPK12,POLR2J3,NCOR2 | 1.365155697 | 0.070172117 |
| hsa05215 | Prostate cancer | Cancers: Specific types | IGF1R,RAF1,LEF1,FGFR1,MDM2,CREB1,RB1,PTEN,IKBKB,PDGFRB,PDPK1 | 1.617059426 | 0.070384375 |
| hsa00750 | Vitamin B6 metabolism | Metabolism of cofactors and vitamins | PNPO,PDXK | 4.31215847 | 0.07253266 |
| hsa05205 | Proteoglycans in cancer | Cancers: Overview | FZD6,IGF1R,RAF1,ARHGEF12,PTPN6,PRKACA,CAMK2D,FGFR1,MDM2,EIF4B,IQGAP1,PXN,ITGB5,PAK1,EZR,FLNA,MAPK12,CTTN,ITGA5,FGF14,IGF2,PDCD4,CD63 | 1.328298814 | 0.074358614 |
| hsa00020 | Citrate cycle (TCA cycle) | Carbohydrate metabolism | IDH3G,IDH1,DLST,SDHA,IDH3B | 2.156079235 | 0.076361376 |
| hsa05166 | HTLV-I infection | Infectious diseases: Viral | FZD6,HLA-DPB1,IL15RA,HLA-C,XBP1,FDPS,HLA-DQA1,RANBP1,PRKACA,ANAPC4,HLA-DMB,ADCY4,TBP,TLN2,CREB1,RB1,NRP1,IKBKB,LTBR,MAPK8,HLA-F,SMAD4,SLC25A6,PDGFRB,CANX,TLN1 | 1.278891105 | 0.082346259 |
| hsa03018 | RNA degradation | Folding, sorting and degradation | XRN1,SKIV2L,DDX6,PAN2,RQCD1,PARN,SKIV2L2,WDR61,PABPC1 | 1.663261124 | 0.084552112 |
| hsa05164 | Influenza A | Infectious diseases: Viral | RAF1,HLA-DPB1,NUP98,FDPS,HLA-DQA1,STAT2,HLA-DMB,DDX58,IL18,IKBKB,MAPK8,IRF9,MAPK12,SLC25A6,TNFRSF10B,KPNA1,BCL2L2-PABPN1,PABPN1 | 1.353817194 | 0.096831582 |
| hsa05133 | Pertussis | Infectious diseases: Bacterial | NOD1,C2,GNAI1,C1R,MAPK8,C3,C1S,MAPK12,ITGA5 | 1.594907927 | 0.103326086 |
| hsa04520 | Adherens junction | Cell communication | IGF1R,LEF1,PTPN6,CSNK2A1,FGFR1,FYN,IQGAP1,PTPRF,SMAD4 | 1.594907927 | 0.103326086 |
| hsa00604 | Glycosphingolipid biosynthesis - ganglio series | Glycan biosynthesis and metabolism | ST3GAL1,HEXA,ST6GALNAC5 | 2.587295082 | 0.103756319 |
| hsa05214 | Glioma | Cancers: Specific types | IGF1R,RAF1,CAMK2D,MDM2,RB1,PTEN,CDK6,PDGFRB | 1.642727036 | 0.106455805 |
| hsa04940 | Type I diabetes mellitus | Endocrine and metabolic diseases | CPE,HLA-DPB1,HLA-C,HLA-DQA1,HLA-DMB,HLA-F | 1.805089592 | 0.108645109 |
| hsa05202 | Transcriptional misregulation in cancer | Cancers: Overview | CDK14,IGF1R,BCL6,PAX8,MDM2,ZEB1,RXRB,RUNX2,NCOR1,PBX3,CSF1R,SS18,GOLPH3,RUNX1,NTRK1,DUSP6,ZBTB16 | 1.332848982 | 0.116692368 |
| hsa00310 | Lysine degradation | Amino acid metabolism | EHMT1,GCDH,SETD8,DLST,SETD2,PLOD2 | 1.764064829 | 0.118061743 |
| hsa04360 | Axon guidance | Development | ARHGEF12,GNAI1,RGS3,NRP1,FYN,SRGAP2,PAK1,NCK2,SEMA6A,SEMA4D,ROBO3,UNC5B,ROBO2,SEMA4B | 1.38252409 | 0.120353357 |
| hsa00601 | Glycosphingolipid biosynthesis - lacto and neolacto series | Glycan biosynthesis and metabolism | ST3GAL4,GCNT2,FUT4,B4GALT4 | 1.990226986 | 0.135527041 |
| hsa01210 | 2-Oxocarboxylic acid metabolism | Reaction module maps | IDH3G,IDH1,IDH3B | 2.282907425 | 0.13853578 |
| hsa05168 | Herpes simplex infection | Infectious diseases: Viral | HLA-DPB1,HLA-C,HLA-DQA1,CSNK2A1,STAT2,HLA-DMB,TAB2,TBP,DDX58,USP7,SRPK1,IKBKB,MAPK8,HLA-F,C3,IRF9,TNFRSF14,PER3 | 1.279431634 | 0.141063963 |
| hsa04621 | NOD-like receptor signaling pathway | Immune system | NLRP1,NOD1,TAB2,IL18,IKBKB,MAPK8,MAPK12 | 1.588689963 | 0.143785479 |
| hsa05330 | Allograft rejection | Immune diseases | HLA-DPB1,HLA-C,HLA-DQA1,HLA-DMB,HLA-F | 1.748172353 | 0.151388554 |
| hsa00511 | Other glycan degradation | Glycan biosynthesis and metabolism | ENGASE,MAN2C1,HEXA | 2.156079235 | 0.157203815 |
| hsa00510 | N-Glycan biosynthesis | Glycan biosynthesis and metabolism | ALG6,MAN1A2,MGAT5,MAN2A2,MAN1B1,ALG9 | 1.617059426 | 0.159488217 |
| hsa05200 | Pathways in cancer | Cancers: Overview | FZD6,IGF1R,LAMB1,RAF1,PLD1,LEF1,PAX8,STK4,FGFR1,MDM2,RXRB,MITF,ITGA3,RB1,PTEN,IKBKB,PIAS2,MAPK8,CDK6,CSF1R,SMAD4,GLI3,ARNT,STK36,PDGFRB,RUNX1,FGF14,NTRK1,ZBTB16 | 1.150790757 | 0.167070989 |
| hsa00520 | Amino sugar and nucleotide sugar metabolism | Carbohydrate metabolism | GALK2,NAGK,GALT,HEXA,GMDS,PGM2 | 1.584058213 | 0.170711906 |
| hsa00531 | Glycosaminoglycan degradation | Glycan biosynthesis and metabolism | HEXA,HGSNAT,GUSB | 2.042601381 | 0.176582704 |
| hsa05216 | Thyroid cancer | Cancers: Specific types | LEF1,PAX8,RXRB,NTRK1 | 1.784341436 | 0.18039773 |
| hsa05131 | Shigellosis | Infectious diseases: Bacterial | NOD1,ARPC2,IKBKB,MAPK8,MAPK12,CTTN,ITGA5 | 1.484513572 | 0.183788891 |
| hsa05332 | Graft-versus-host disease | Immune diseases | HLA-DPB1,HLA-C,HLA-DQA1,HLA-DMB,HLA-F | 1.617059426 | 0.190344426 |
| hsa04971 | Gastric acid secretion | Digestive system | PRKACA,CAMK2D,PLCB4,ADCY4,SLC4A2,GNAI1,MYLK,EZR | 1.417695935 | 0.192787977 |
| hsa00052 | Galactose metabolism | Carbohydrate metabolism | GALK2,GALT,GAA,PGM2 | 1.724863388 | 0.196327575 |
| hsa00532 | Glycosaminoglycan biosynthesis - chondroitin sulfate / dermatan sulfate | Glycan biosynthesis and metabolism | XYLT1,UST,B3GAT3 | 1.940471311 | 0.196568298 |
| hsa04512 | ECM-receptor interaction | Signaling molecules and interaction | LAMB1,GP1BB,COL2A1,ITGA9,THBS3,ITGA3,ITGB5,ITGA5,ITGA11 | 1.353817194 | 0.208236639 |
| hsa04914 | Progesterone-mediated oocyte maturation | Endocrine system | IGF1R,RAF1,PRKACA,ANAPC4,PLK1,ADCY4,GNAI1,MAPK8,MAPK12 | 1.353817194 | 0.208236639 |
| hsa00900 | Terpenoid backbone biosynthesis | Metabolism of terpenoids and polyketides | FDPS,IDI1,FNTB | 1.848067916 | 0.217059328 |
| hsa04974 | Protein digestion and absorption | Digestive system | COL9A1,COL2A1,DPP4,COL14A1,SLC38A2,COL12A1,COL18A1,COL9A3,COL13A1 | 1.338256077 | 0.21768154 |
| hsa00565 | Ether lipid metabolism | Lipid metabolism | PLD1,PAFAH1B1,LPCAT1,PPAP2A,PLA2G16 | 1.540056596 | 0.218067403 |
| hsa04916 | Melanogenesis | Endocrine system | FZD6,RAF1,LEF1,PRKACA,CAMK2D,PLCB4,ADCY4,CREB1,MITF,GNAI1 | 1.306714688 | 0.220684151 |
| hsa05223 | Non-small cell lung cancer | Cancers: Specific types | RAF1,STK4,RXRB,RB1,CDK6,PDPK1 | 1.437386157 | 0.231171005 |
| hsa04120 | Ubiquitin mediated proteolysis | Folding, sorting and degradation | PPIL2,ANAPC4,RHOBTB1,HERC2,MDM2,UBE2Q1,CUL4A,FBXW7,PIAS2,UBA2,WWP1,UBA6,UBR5 | 1.227548762 | 0.237867297 |
| hsa05212 | Pancreatic cancer | Cancers: Specific types | RAF1,PLD1,RB1,IKBKB,MAPK8,CDK6,SMAD4 | 1.372050422 | 0.239278708 |
| hsa04810 | Regulation of actin cytoskeleton | Cell motility | RAF1,ARHGEF12,ITGA9,FGFR1,SSH2,ITGA3,ARPC2,IQGAP1,PXN,ITGB5,MYLK,PAK1,EZR,ARHGEF7,ITGA5,PDGFRB,FGF14,ITGA11,SSH1 | 1.159401098 | 0.23964184 |
| hsa03050 | Proteasome | Folding, sorting and degradation | PSMB10,PSMB9,PSMC6,PSMC4,PSMA1 | 1.470054024 | 0.246920677 |
| hsa00062 | Fatty acid elongation | Lipid metabolism | HSD17B12,ELOVL1,PPT2 | 1.687366358 | 0.259172049 |
| hsa04962 | Vasopressin-regulated water reabsorption | Excretory system | DYNC1I1,PRKACA,CREB1,RAB5A,DYNC1I2 | 1.437386157 | 0.261696879 |
| hsa04140 | Regulation of autophagy | Transport and catabolism | ATG4B,ATG12,ATG4A,ATG3 | 1.521938284 | 0.263604065 |
| hsa00471 | D-Glutamine and D-glutamate metabolism | Metabolism of other amino acids | GLS | 3.234118852 | 0.27510496 |
| hsa00730 | Thiamine metabolism | Metabolism of cofactors and vitamins | NTPCR | 3.234118852 | 0.27510496 |
| hsa04672 | Intestinal immune network for IgA production | Immune system | HLA-DPB1,IL15RA,HLA-DQA1,HLA-DMB,LTBR | 1.406138632 | 0.276666552 |
| hsa00534 | Glycosaminoglycan biosynthesis - heparan sulfate / heparin | Glycan biosynthesis and metabolism | XYLT1,EXT1,B3GAT3 | 1.617059426 | 0.280612448 |
| hsa05016 | Huntington*s disease | Neurodegenerative diseases | BDNF,PLCB4,TBP,CREB1,DNALI1,COX7A2L,CLTCL1,CLTB,ATP5A1,NDUFV1,NDUFS2,SLC25A6,SDHA,POLR2J3,TFAM,UQCRH | 1.143555837 | 0.287764456 |
| hsa04713 | Circadian entrainment | Environmental adaptation | PRKACA,CAMK2D,PLCB4,ADCY4,CREB1,RPS6KA5,GNAI1,GNB3,PER3 | 1.238598709 | 0.287814155 |
| hsa00790 | Folate biosynthesis | Metabolism of cofactors and vitamins | PTS,FPGS | 1.848067916 | 0.294722187 |
| hsa00603 | Glycosphingolipid biosynthesis - globo series | Glycan biosynthesis and metabolism | ST3GAL1,HEXA | 1.848067916 | 0.294722187 |
| hsa04630 | Jak-STAT signaling pathway | Signal transduction | CNTF,IL15RA,PTPN6,STAT2,IL13RA1,LIFR,PIAS2,IL10RA,LEPR,IRF9,STAM2,EPOR,STAT6,SPRED1 | 1.153571056 | 0.298145907 |
| hsa04622 | RIG-I-like receptor signaling pathway | Immune system | SIKE1,DDX58,ATG12,IKBKB,MAPK8,TANK,MAPK12 | 1.275427153 | 0.299247868 |
| hsa05132 | Salmonella infection | Infectious diseases: Bacterial | DYNC1I1,IL18,ARPC2,MAPK8,KLC1,FLNA,MAPK12,DYNC1I2 | 1.246889196 | 0.299442465 |
| hsa04961 | Endocrine and other factor-regulated calcium reabsorption | Excretory system | ATP2B1,PRKACA,PLCB4,CLTCL1,CLTB | 1.347549522 | 0.307069271 |
| hsa05140 | Leishmaniasis | Infectious diseases: Parasitic | HLA-DPB1,HLA-DQA1,PTPN6,HLA-DMB,TAB2,C3,MAPK12 | 1.257712887 | 0.311616603 |
| hsa00533 | Glycosaminoglycan biosynthesis - keratan sulfate | Glycan biosynthesis and metabolism | ST3GAL1,B4GALT4 | 1.724863388 | 0.324031888 |
| hsa05220 | Chronic myeloid leukemia | Cancers: Specific types | RAF1,MDM2,RB1,IKBKB,CDK6,SMAD4,RUNX1 | 1.240483943 | 0.324075412 |
| hsa05222 | Small cell lung cancer | Cancers: Specific types | LAMB1,RXRB,ITGA3,RB1,PTEN,IKBKB,PIAS2,CDK6 | 1.203393061 | 0.333834137 |
| hsa05219 | Bladder cancer | Cancers: Specific types | RAF1,MDM2,RPS6KA5,RB1 | 1.361734254 | 0.334283414 |
| hsa00030 | Pentose phosphate pathway | Carbohydrate metabolism | H6PD,PGM2,RBKS | 1.437386157 | 0.345491417 |
| hsa00340 | Histidine metabolism | Amino acid metabolism | ALDH1A3,ALDH3B1,HEMK1 | 1.437386157 | 0.345491417 |
| hsa00983 | Drug metabolism - other enzymes | Xenobiotics biodegradation and metabolism | ITPA,IMPDH1,GUSB,UCK1,CES2 | 1.268281903 | 0.353406624 |
| hsa05152 | Tuberculosis | Infectious diseases: Bacterial | RAF1,HLA-DPB1,ARHGEF12,HLA-DQA1,CAMK2D,HLA-DMB,CREB1,IL18,MAPK8,IL10RA,ATP6V0A1,C3,NFYC,RAB5A,MAPK12 | 1.096311475 | 0.356050836 |
| hsa04727 | GABAergic synapse | Nervous system | GLS,PRKACA,SLC38A2,ADCY4,GNAI1,GNB3,GPHN,SLC38A5 | 1.176043219 | 0.357088615 |
| hsa04260 | Cardiac muscle contraction | Circulatory system | TPM4,COX7A2L,CACNB1,CACNB3,CACNA2D1,CACNA2D4,UQCRH | 1.191517472 | 0.361845265 |
| hsa05100 | Bacterial invasion of epithelial cells | Infectious diseases: Bacterial | ARPC2,PXN,CLTCL1,CLTB,CTTN,ITGA5,SEPT2 | 1.191517472 | 0.361845265 |
| hsa05320 | Autoimmune thyroid disease | Immune diseases | HLA-DPB1,HLA-C,HLA-DQA1,HLA-DMB,HLA-F | 1.243891866 | 0.368939479 |
| hsa04912 | GnRH signaling pathway | Endocrine system | RAF1,PLD1,PRKACA,CAMK2D,PLCB4,ADCY4,MAPK8,MAPK12 | 1.149908925 | 0.380498582 |
| hsa04151 | PI3K-Akt signaling pathway | Signal transduction | IGF1R,LAMB1,RAF1,COL2A1,ITGA9,BCL2L11,FGFR1,SGK1,MDM2,THBS3,CREB1,EIF4B,PPP2R3C,ITGA3,PTEN,IKBKB,ITGB5,CDK6,RHEB,GNB3,CSF1R,ITGA5,PDGFRB,EPOR,FGF14,ITGA11,PDPK1 | 1.018323137 | 0.385757689 |
| hsa00410 | beta-Alanine metabolism | Metabolism of other amino acids | ALDH6A1,ALDH1A3,ALDH3B1 | 1.338256077 | 0.388503907 |
| hsa04666 | Fc gamma R-mediated phagocytosis | Immune system | RAF1,PLD1,VASP,ARPC2,PTPRC,PAK1,ASAP1,PPAP2A | 1.137272564 | 0.392234254 |
| hsa05145 | Toxoplasmosis | Infectious diseases: Parasitic | LAMB1,HLA-DPB1,HLA-DQA1,HLA-DMB,TAB2,GNAI1,IKBKB,MAPK8,IL10RA,MAPK12 | 1.105681659 | 0.397687917 |
| hsa05130 | Pathogenic Escherichia coli infection | Infectious diseases: Bacterial | ARPC2,FYN,NCK2,EZR,CTTN | 1.197821797 | 0.399983447 |
| hsa05032 | Morphine addiction | Substance dependence | PRKACA,PDE7B,ADCY4,PDE4D,GNAI1,PDE8A,GNB3,ADRBK2 | 1.124910905 | 0.403976041 |
| hsa00360 | Phenylalanine metabolism | Amino acid metabolism | ALDH1A3,ALDH3B1 | 1.437386157 | 0.409488245 |
| hsa04710 | Circadian rhythm | Environmental adaptation | CREB1,PER3,CSNK1E | 1.293647541 | 0.409755794 |
| hsa05310 | Asthma | Immune diseases | HLA-DPB1,HLA-DQA1,HLA-DMB | 1.293647541 | 0.409755794 |
| hsa00561 | Glycerolipid metabolism | Lipid metabolism | DGKA,GPAT2,DGKZ,MBOAT2,PPAP2A | 1.176043219 | 0.415447237 |
| hsa04380 | Osteoclast differentiation | Development | STAT2,TAB2,CREB1,LCP2,MITF,FYN,IKBKB,MAPK8,CSF1R,IRF9,MAPK12 | 1.078039617 | 0.418341963 |
| hsa01230 | Biosynthesis of amino acids | Reaction module maps | SHMT2,ALDH18A1,IDH3G,IDH1,GAPDH,IDH3B | 1.141453713 | 0.421512112 |
| hsa04660 | T cell receptor signaling pathway | Immune system | RAF1,PTPN6,LCP2,FYN,IKBKB,PTPRC,PAK1,NCK2,MAPK12 | 1.088114754 | 0.428473769 |
| hsa00460 | Cyanoamino acid metabolism | Metabolism of other amino acids | SHMT2 | 1.848067916 | 0.430436794 |
| hsa00670 | One carbon pool by folate | Metabolism of cofactors and vitamins | SHMT2,AMT | 1.361734254 | 0.436806652 |
| hsa04972 | Pancreatic secretion | Digestive system | ATP2B1,PLCB4,TPCN2,ADCY4,SLC4A2,RAB8A,SLC4A4,RAP1B | 1.089387403 | 0.439134592 |
| hsa00071 | Fatty acid metabolism | Lipid metabolism | ACADVL,GCDH,CPT1B,ACAA1 | 1.176043219 | 0.440751483 |
| hsa05221 | Acute myeloid leukemia | Cancers: Specific types | RAF1,LEF1,IKBKB,RUNX1,ZBTB16 | 1.134778545 | 0.446148202 |
| hsa05416 | Viral myocarditis | Cardiovascular diseases | HLA-DPB1,HLA-C,HLA-DQA1,HLA-DMB,FYN,HLA-F | 1.108840749 | 0.449084421 |
| hsa00250 | Alanine, aspartate and glutamate metabolism | Amino acid metabolism | GLS,ASNS,ADSL | 1.21279457 | 0.451500867 |
| hsa05203 | Viral carcinogenesis | Cancers: Overview | HDAC6,HLA-C,RANBP1,PRKACA,MDM2,TBP,CREB1,RB1,USP7,PXN,LTBR,HLA-F,CDK6,C3,IRF9 | 1.026704398 | 0.453747084 |
| hsa04910 | Insulin signaling pathway | Endocrine system | RAF1,PRKACA,IKBKB,PTPRF,MAPK8,FLOT1,PHKG2,RHEB,MKNK2,PHKG1,PDPK1 | 1.038695106 | 0.46703469 |
| hsa05143 | African trypanosomiasis | Infectious diseases: Parasitic | PLCB4,IL18,HBB | 1.176043219 | 0.471909316 |
| hsa05322 | Systemic lupus erythematosus | Immune diseases | HLA-DPB1,HLA-DQA1,HLA-DMB,C2,C1R,C3,C1S,TROVE2 | 1.056038809 | 0.473986902 |
| hsa00230 | Purine metabolism | Nucleotide metabolism | POLR3E,PDE7B,ADCY4,PDE4D,NPR1,ADSL,NTPCR,PDE8A,ITPA,IMPDH1,AK5,POLR2J3,PGM2 | 1.019237457 | 0.478481953 |
| hsa01040 | Biosynthesis of unsaturated fatty acids | Lipid metabolism | HSD17B12,ACAA1 | 1.232045277 | 0.489261699 |
| hsa04150 | mTOR signaling pathway | Signal transduction | EIF4B,PTEN,IKBKB,RHEB,PDPK1 | 1.078039617 | 0.491336364 |
| hsa00562 | Inositol phosphate metabolism | Carbohydrate metabolism | PLCD1,PLCB4,ALDH6A1,ISYNA1,PTEN | 1.060366837 | 0.506097856 |
| hsa04728 | Dopaminergic synapse | Nervous system | PRKACA,CAMK2D,PLCB4,CREB1,PPP2R3C,GNAI1,MAPK8,GNB3,MAPK12,GSK3A | 1.010662141 | 0.510152337 |
| hsa04964 | Proximal tubule bicarbonate reclamation | Excretory system | GLS,SLC4A4 | 1.176043219 | 0.514304742 |
| hsa00072 | Synthesis and degradation of ketone bodies | Lipid metabolism | OXCT1 | 1.437386157 | 0.514992395 |
| hsa04310 | Wnt signaling pathway | Signal transduction | FZD6,LEF1,CSNK2A1,PRKACA,CAMK2D,PLCB4,SENP2,DAAM1,MAPK8,SMAD4,CSNK1E | 0.995113493 | 0.52440379 |
| hsa04724 | Glutamatergic synapse | Nervous system | PLD1,GLS,PRKACA,PLCB4,SLC38A2,ADCY4,GNAI1,GNB3,ADRBK2 | 1.003692058 | 0.525359643 |
| hsa04721 | Synaptic vesicle cycle | Nervous system | ATP6V1D,STX2,CLTCL1,CLTB,ATP6V0A1 | 1.026704398 | 0.535076425 |
| hsa03060 | Protein export | Folding, sorting and degradation | SRP9,SPCS3 | 1.124910905 | 0.538514862 |
| hsa05030 | Cocaine addiction | Substance dependence | BDNF,PRKACA,CREB1,GNAI1 | 1.034918033 | 0.541507458 |
| hsa04722 | Neurotrophin signaling pathway | Nervous system | RAF1,BDNF,CAMK2D,RPS6KA5,IKBKB,MAPK8,MAPK12,RAP1B,NTRK1 | 0.986680328 | 0.546163436 |
| hsa04670 | Leukocyte transendothelial migration | Immune system | F11R,VASP,JAM2,GNAI1,ESAM,PXN,EZR,MAPK12,RAP1B | 0.986680328 | 0.546163436 |
| hsa04340 | Hedgehog signaling pathway | Signal transduction | PRKACA,GLI3,STK36,CSNK1E | 1.014625522 | 0.557387669 |
| hsa04978 | Mineral absorption | Digestive system | ATP2B1,SLC11A2,SLC26A6,TRPM7 | 1.014625522 | 0.557387669 |
| hsa04530 | Tight junction | Cell communication | F11R,CSNK2A1,SYMPK,JAM2,PRKCH,MAGI1,GNAI1,PTEN,PARD6G,CTTN | 0.972667324 | 0.559295059 |
| hsa05161 | Hepatitis B | Infectious diseases: Viral | RAF1,STAT2,CREB1,DDX58,RB1,PTEN,IKBKB,MAPK8,CDK6,SMAD4,STAT6 | 0.961494794 | 0.570607969 |
| hsa05213 | Endometrial cancer | Cancers: Specific types | RAF1,LEF1,PTEN,PDPK1 | 0.995113493 | 0.572963308 |
| hsa05211 | Renal cell carcinoma | Cancers: Specific types | RAF1,FLCN,PAK1,ARNT,RAP1B | 0.980036016 | 0.576990325 |
| hsa00592 | alpha-Linolenic acid metabolism | Lipid metabolism | ACAA1,PLA2G16 | 1.034918033 | 0.584363067 |
| hsa00350 | Tyrosine metabolism | Amino acid metabolism | ALDH1A3,ALDH3B1,HEMK1 | 0.995113493 | 0.585908084 |
| hsa05134 | Legionellosis | Infectious diseases: Bacterial | BCL2L13,EEF1A1,IL18,C3 | 0.976337767 | 0.588222075 |
| hsa04115 | p53 signaling pathway | Cell growth and death | SHISA5,MDM2,PTEN,CDK6,TNFRSF10B | 0.951211427 | 0.603772477 |
| hsa04110 | Cell cycle | Cell growth and death | ANAPC4,PLK1,MDM2,RB1,CDK6,STAG2,SMAD4,CDC14B,DBF4 | 0.938937731 | 0.606193949 |
| hsa04720 | Long-term potentiation | Nervous system | RAF1,PRKACA,CAMK2D,PLCB4,RAP1B | 0.937425754 | 0.616789681 |
| hsa04610 | Complement and coagulation cascades | Immune system | C2,CFB,C1R,C3,C1S | 0.937425754 | 0.616789681 |
| hsa05217 | Basal cell carcinoma | Cancers: Specific types | FZD6,LEF1,GLI3,STK36 | 0.940834575 | 0.617748182 |
| hsa04725 | Cholinergic synapse | Nervous system | PRKACA,CAMK2D,PLCB4,ADCY4,CREB1,GNAI1,FYN,GNB3 | 0.924033958 | 0.626137674 |
| hsa00760 | Nicotinate and nicotinamide metabolism | Metabolism of cofactors and vitamins | NADSYN1,NADK | 0.958257438 | 0.626734287 |
| hsa04966 | Collecting duct acid secretion | Excretory system | ATP6V1D,ATP6V0A1 | 0.958257438 | 0.626734287 |
| hsa04920 | Adipocytokine signaling pathway | Endocrine system | CPT1B,RXRB,IKBKB,MAPK8,LEPR | 0.924033958 | 0.629548501 |
| hsa04664 | Fc epsilon RI signaling pathway | Immune system | RAF1,LCP2,FYN,MAPK8,MAPK12 | 0.924033958 | 0.629548501 |
| hsa03320 | PPAR signaling pathway | Endocrine system | CPT1B,ACAA1,RXRB,NR1H3,PDPK1 | 0.911019395 | 0.642043243 |
| hsa03440 | Homologous recombination | Replication and repair | SSBP1,RAD51B | 0.924033958 | 0.646620692 |
| hsa03450 | Non-homologous end-joining | Replication and repair | POLM | 0.995113493 | 0.648252721 |
| hsa04911 | Insulin secretion | Endocrine system | PRKACA,CAMK2D,PLCB4,ADCY4,SNAP23,CREB1 | 0.902544796 | 0.650719455 |
| hsa04062 | Chemokine signaling pathway | Immune system | RAF1,PRKACA,STAT2,PLCB4,ADCY4,GNAI1,IKBKB,PXN,PAK1,GNB3,RAP1B,ADRBK2,GSK3A | 0.90416226 | 0.6515875 |
| hsa00860 | Porphyrin and chlorophyll metabolism | Metabolism of cofactors and vitamins | FECH,CP,GUSB | 0.902544796 | 0.652495718 |
| hsa05012 | Parkinson*s disease | Neurodegenerative diseases | SEPT5,SNCAIP,COX7A2L,ATP5A1,NDUFV1,NDUFS2,SLC25A6,SDHA,UQCRH | 0.902544796 | 0.652970189 |
| hsa04640 | Hematopoietic cell lineage | Immune system | GP1BB,CD9,ITGA3,CSF1R,ITGA5,EPOR | 0.892170718 | 0.66172187 |
| hsa05323 | Rheumatoid arthritis | Immune diseases | HLA-DPB1,ATP6V1D,HLA-DQA1,HLA-DMB,IL18,ATP6V0A1 | 0.892170718 | 0.66172187 |
| hsa00650 | Butanoate metabolism | Carbohydrate metabolism | AACS,OXCT1 | 0.892170718 | 0.665652998 |
| hsa00280 | Valine, leucine and isoleucine degradation | Amino acid metabolism | ALDH6A1,ACAA1,OXCT1 | 0.882032414 | 0.66788191 |
| hsa04723 | Retrograde endocannabinoid signaling | Nervous system | PRKACA,PLCB4,ADCY4,GNAI1,MAPK8,GNB3,MAPK12 | 0.887797332 | 0.668341782 |
| hsa00190 | Oxidative phosphorylation | Energy metabolism | ATP6V1D,COX7A2L,PPA2,ATP6V0A1,ATP5A1,NDUFV1,NDUFS2,SDHA,UQCRH | 0.888765486 | 0.670751267 |
| hsa04540 | Gap junction | Cell communication | RAF1,PRKACA,PLCB4,ADCY4,GNAI1,PDGFRB | 0.882032414 | 0.672502554 |
| hsa03420 | Nucleotide excision repair | Replication and repair | RAD23A,CUL4A,ERCC1 | 0.862431694 | 0.682760474 |
| hsa04064 | NF-kappa B signaling pathway | Signal transduction | CSNK2A1,TAB2,DDX58,IKBKB,LTBR,ERC1 | 0.872121938 | 0.683058798 |
| hsa04270 | Vascular smooth muscle contraction | Circulatory system | RAF1,ARHGEF12,PRKACA,PLCB4,ADCY4,PRKCH,NPR1,MYLK | 0.87704918 | 0.683360494 |
| hsa00512 | Mucin type O-Glycan biosynthesis | Glycan biosynthesis and metabolism | ST3GAL1,GALNT2 | 0.862431694 | 0.683844892 |
| hsa04730 | Long-term depression | Nervous system | IGF1R,RAF1,PLCB4,GNAI1 | 0.862431694 | 0.685462183 |
| hsa03008 | Ribosome biogenesis in eukaryotes | Translation | XRN1,CSNK2A1,PWP2,REXO2,NOB1 | 0.862431694 | 0.689297601 |
| hsa04623 | Cytosolic DNA-sensing pathway | Immune system | POLR3E,DDX58,IL18,IKBKB | 0.848293469 | 0.697928619 |
| hsa03020 | RNA polymerase | Transcription | POLR3E,POLR2J3 | 0.834611317 | 0.701213039 |
| hsa05210 | Colorectal cancer | Cancers: Specific types | RAF1,LEF1,MAPK8,SMAD4 | 0.834611317 | 0.710033529 |
| hsa05144 | Malaria | Infectious diseases: Parasitic | THBS3,IL18,HBB | 0.825732473 | 0.711003263 |
| hsa04070 | Phosphatidylinositol signaling system | Signal transduction | PLCD1,DGKA,PLCB4,PTEN,DGKZ | 0.818764266 | 0.732083616 |
| hsa04668 | TNF signaling pathway | Signal transduction | DNM1L,TAB2,CREB1,RPS6KA5,IKBKB,MAPK8,MAPK12 | 0.830782824 | 0.733422324 |
| hsa04114 | Oocyte meiosis | Cell growth and death | IGF1R,PRKACA,ANAPC4,PLK1,CAMK2D,ADCY4,MAPK12 | 0.823230253 | 0.7419434 |
| hsa04614 | Renin-angiotensin system | Endocrine system | NLN | 0.760969142 | 0.744844592 |
| hsa00450 | Selenocompound metabolism | Metabolism of other amino acids | PSTK | 0.760969142 | 0.744844592 |
| hsa00120 | Primary bile acid biosynthesis | Lipid metabolism | HSD17B4 | 0.760969142 | 0.744844592 |
| hsa00770 | Pantothenate and CoA biosynthesis | Metabolism of cofactors and vitamins | PANK3 | 0.760969142 | 0.744844592 |
| hsa00010 | Glycolysis / Gluconeogenesis | Carbohydrate metabolism | ALDH1A3,ALDH3B1,GAPDH,PGM2 | 0.784028813 | 0.754867273 |
| hsa00590 | Arachidonic acid metabolism | Lipid metabolism | EPHX2,PTGES2,PTGIS,PLA2G16 | 0.784028813 | 0.754867273 |
| hsa04915 | Estrogen signaling pathway | Endocrine system | RAF1,PRKACA,PLCB4,ADCY4,CREB1,GNAI1 | 0.800194355 | 0.759265921 |
| hsa04913 | Ovarian steroidogenesis | Endocrine system | IGF1R,PRKACA,ADCY4 | 0.760969142 | 0.761573049 |
| hsa03030 | DNA replication | Replication and repair | RNASEH2B,SSBP1 | 0.739227166 | 0.762856913 |
| hsa00100 | Steroid biosynthesis | Lipid metabolism | CYP2R1 | 0.718693078 | 0.764515341 |
| hsa04742 | Taste transduction | Sensory system | PRKACA,ADCY4,GNB3 | 0.74633512 | 0.7730262 |
| hsa00051 | Fructose and mannose metabolism | Carbohydrate metabolism | GMDS,PHPT1 | 0.718693078 | 0.776425901 |
| hsa05020 | Prion diseases | Neurodegenerative diseases | PRKACA,FYN | 0.718693078 | 0.776425901 |
| hsa00500 | Starch and sucrose metabolism | Carbohydrate metabolism | GUSB,GAA,PGM2 | 0.732253325 | 0.784022089 |
| hsa03010 | Ribosome | Translation | RPL27,RPL9,MRPS7,RPL24,RPL37A,RPL4,RPLP0,MRPL3 | 0.790013765 | 0.787010558 |
| hsa04970 | Salivary secretion | Digestive system | ATP2B1,PRKACA,PLCB4,ADCY4,SLC4A2 | 0.760969142 | 0.787902391 |
| hsa00260 | Glycine, serine and threonine metabolism | Amino acid metabolism | SHMT2,AMT | 0.699268941 | 0.789307462 |
| hsa05110 | Vibrio cholerae infection | Infectious diseases: Bacterial | ATP6V1D,PRKACA,ATP6V0A1 | 0.718693078 | 0.794571148 |
| hsa00240 | Pyrimidine metabolism | Nucleotide metabolism | CMPK2,POLR3E,ITPA,DTYMK,POLR2J3,UCK1 | 0.760969142 | 0.799485132 |
| hsa04650 | Natural killer cell mediated cytotoxicity | Immune system | RAF1,HLA-C,PTPN6,LCP2,FYN,SH3BP2,PAK1,TNFRSF10B | 0.778133859 | 0.800442342 |
| hsa05162 | Measles | Infectious diseases: Viral | CSNK2A1,STAT2,TAB2,DDX58,FYN,CDK6,IRF9,TNFRSF10B | 0.778133859 | 0.800442342 |
| hsa05160 | Hepatitis C | Infectious diseases: Viral | RAF1,STAT2,DDX58,NR1H3,IKBKB,MAPK8,IRF9,MAPK12 | 0.778133859 | 0.800442342 |
| hsa04012 | ErbB signaling pathway | Signal transduction | RAF1,CAMK2D,MAPK8,PAK1,NCK2 | 0.743475598 | 0.804348312 |
| hsa00330 | Arginine and proline metabolism | Amino acid metabolism | CKB,GLS,ALDH18A1 | 0.705625931 | 0.804684324 |
| hsa05142 | Chagas disease (American trypanosomiasis) | Infectious diseases: Parasitic | PLCB4,GNAI1,IKBKB,MAPK8,C3,MAPK12 | 0.753581092 | 0.80686591 |
| hsa04917 | Prolactin signaling pathway | Endocrine system | RAF1,GALT,MAPK8,MAPK12 | 0.718693078 | 0.811757226 |
| hsa04976 | Bile secretion | Digestive system | PRKACA,ADCY4,SLC4A2,SLC4A4 | 0.718693078 | 0.811757226 |
| hsa04020 | Calcium signaling pathway | Signal transduction | ATP2B1,PLCD1,PRKACA,CAMK2D,PLCB4,ADCY4,MYLK,PHKG2,SLC25A6,PDGFRB,PHKG1 | 0.786194638 | 0.812196273 |
| hsa04960 | Aldosterone-regulated sodium reabsorption | Excretory system | SGK1,PDPK1 | 0.663408995 | 0.813110649 |
| hsa04066 | HIF-1 signaling pathway | Signal transduction | IGF1R,CAMK2D,LTBR,ARNT,GAPDH,MKNK2 | 0.732253325 | 0.827729479 |
| hsa03430 | Mismatch repair | Replication and repair | SSBP1 | 0.562455453 | 0.842297802 |
| hsa04662 | B cell receptor signaling pathway | Immune system | RAF1,CD72,PTPN6,IKBKB | 0.680867127 | 0.843293585 |
| hsa04977 | Vitamin digestion and absorption | Digestive system | ABCC1 | 0.539019809 | 0.854444057 |
| hsa04320 | Dorso-ventral axis formation | Development | PIWIL4 | 0.539019809 | 0.854444057 |
| hsa00630 | Glyoxylate and dicarboxylate metabolism | Carbohydrate metabolism | SHMT2 | 0.539019809 | 0.854444057 |
| hsa02010 | ABC transporters | Membrane transport | ABCC1,ABCA2 | 0.58802161 | 0.86237475 |
| hsa04146 | Peroxisome | Transport and catabolism | EPHX2,ACAA1,IDH1,HSD17B4 | 0.655011413 | 0.863905741 |
| hsa04350 | TGF-beta signaling pathway | Signal transduction | SMAD7,BMP8A,SMAD4,SMAD9 | 0.638838292 | 0.876312446 |
| hsa00600 | Sphingolipid metabolism | Lipid metabolism | SMPD4,PPAP2A | 0.550488315 | 0.885890005 |
| hsa04930 | Type II diabetes mellitus | Endocrine and metabolic diseases | IKBKB,MAPK8 | 0.539019809 | 0.892859361 |
| hsa04330 | Notch signaling pathway | Signal transduction | JAG2,NCOR2 | 0.539019809 | 0.892859361 |
| hsa04370 | VEGF signaling pathway | Signal transduction | RAF1,PXN,MAPK12 | 0.579245168 | 0.89636938 |
| hsa05031 | Amphetamine addiction | Substance dependence | PRKACA,CAMK2D,CREB1 | 0.570726856 | 0.901903347 |
| hsa04210 | Apoptosis | Cell growth and death | PRKACA,IKBKB,NTRK1,TNFRSF10B | 0.594780479 | 0.907798839 |
| hsa04390 | Hippo signaling pathway | Signal transduction | FZD6,SMAD7,BMP8A,LEF1,PARD6G,SMAD4,MOB1A,CSNK1E | 0.667689053 | 0.908579774 |
| hsa00514 | Other types of O-glycan biosynthesis | Glycan biosynthesis and metabolism | FUT4 | 0.431215847 | 0.909987433 |
| hsa03460 | Fanconi anemia pathway | Replication and repair | APITD1,ERCC1 | 0.497556747 | 0.916945644 |
| hsa05034 | Alcoholism | Substance dependence | RAF1,BDNF,HDAC6,PRKACA,CREB1,GNAI1,GNB3 | 0.642236368 | 0.917766506 |
| hsa00982 | Drug metabolism - cytochrome P450 | Xenobiotics biodegradation and metabolism | FMO2,ALDH1A3,ALDH3B1 | 0.539019809 | 0.921453869 |
| hsa05146 | Amoebiasis | Infectious diseases: Parasitic | LAMB1,COL2A1,PRKACA,PLCB4,RAB5A | 0.598910899 | 0.92206996 |
| hsa05014 | Amyotrophic lateral sclerosis (ALS) | Neurodegenerative diseases | RAB5A,MAPK12 | 0.488168883 | 0.922114921 |
| hsa00640 | Propanoate metabolism | Carbohydrate metabolism | ALDH6A1 | 0.404264857 | 0.923303909 |
| hsa00591 | Linoleic acid metabolism | Lipid metabolism | PLA2G16 | 0.392014406 | 0.929202679 |
| hsa00040 | Pentose and glucuronate interconversions | Carbohydrate metabolism | GUSB | 0.392014406 | 0.929202679 |
| hsa04060 | Cytokine-cytokine receptor interaction | Signaling molecules and interaction | CNTF,IL15RA,IL13RA1,TNFRSF25,IL18,LTBR,LIFR,IL10RA,LEPR,CSF1R,PDGFRB,EPOR,TNFRSF14,TNFRSF10B | 0.688633672 | 0.932698859 |
| hsa04726 | Serotonergic synapse | Nervous system | RAF1,PRKACA,PLCB4,GNAI1,GNB3 | 0.572410416 | 0.938458947 |
| hsa05010 | Alzheimer*s disease | Neurodegenerative diseases | PLCB4,COX7A2L,ATP5A1,NDUFV1,NDUFS2,GAPDH,SDHA,UQCRH | 0.623444598 | 0.940495027 |
| hsa05340 | Primary immunodeficiency | Immune diseases | PTPRC | 0.359346539 | 0.94430941 |
| hsa05204 | Chemical carcinogenesis | Cancers: Overview | ALDH1A3,ALDH3B1,ARNT | 0.485117828 | 0.950239426 |
| hsa00380 | Tryptophan metabolism | Amino acid metabolism | GCDH | 0.331704498 | 0.956187495 |
| hsa04620 | Toll-like receptor signaling pathway | Immune system | TAB2,IKBKB,MAPK8,MAPK12 | 0.497556747 | 0.961810806 |
| hsa00620 | Pyruvate metabolism | Carbohydrate metabolism | ACYP2 | 0.31552379 | 0.962660309 |
| hsa04975 | Fat digestion and absorption | Digestive system | PPAP2A | 0.31552379 | 0.962660309 |
| hsa03022 | Basal transcription factors | Transcription | TBP | 0.294010805 | 0.970618611 |
| hsa00480 | Glutathione metabolism | Metabolism of other amino acids | IDH1 | 0.269509904 | 0.978652158 |
| hsa00980 | Metabolism of xenobiotics by cytochrome P450 | Xenobiotics biodegradation and metabolism | ALDH1A3,ALDH3B1 | 0.327505707 | 0.986233195 |
| hsa00140 | Steroid hormone biosynthesis | Lipid metabolism | HSD17B12 | 0.235208644 | 0.987787199 |
| hsa04080 | Neuroactive ligand-receptor interaction | Signaling molecules and interaction | APLNR,LEPR | 0.094772714 | 0.999999989 |
| hsa04740 | Olfactory transduction | Sensory system | PRKACA,CAMK2D,ADRBK2 | 0.098251712 | 1 |
