# Supplementary material for: Genome-Wide Identification of Long Noncoding RNAs in Human Intervertebral Disc Degeneration by RNA Sequencing
Source: Hindawi journal article supplement (doi:10.1155/2016/3684875), 2016-01-01
Supplement: f10 [file 3684875.f10.docx]

| **Up-regulated mRNA** | | | **Down-regulated mRNA** | | |
| --- | --- | --- | --- | --- | --- |
| Gene Symbol | Microarray* log2(IDD/control) | RNA-seq log2(IDD/control) | Gene Symbol | Microarray* log2(IDD/control) | RNA-seq log2(IDD/control) |
| ABI3BP | 1.76 | 1.01 | KCNN4 | -4.61 | -1.33 |
| ANGPTL6 | 3.13 | 2.17 | KLF10 | -4.86 | -2.09 |
| AP2S1 | 2.94 | 1.86 | MAD1L1 | -2.35 | -2.07 |
| ARHGEF9 | 3.56 | 1.39 | MFAP2 | -5.92 | -1.12 |
| CHN1 | 2.94 | 2.99 | NCOR2 | -1.73 | -1.18 |
| CHPT1 | 3.14 | 1.51 | NFKBIB | -2.65 | -4.06 |
| COL11A2 | 2.27 | 1.17 | NLGN4X | -2.11 | -2.14 |
| CRIP1 | 2.25 | 2.41 | PARVG | -4.95 | -1.83 |
| DBP | 1.74 | 1.00 | PEX5 | -3.09 | -1.15 |
| DGKZ | 4.12 | 1.16 | RAI2 | -3.86 | -1.64 |
| DICER1 | 3.45 | 1.23 | RNF14 | -7.59 | -2.79 |
| EEF1B2 | 1.70 | 1.07 | SAR1B | -3.41 | -1.64 |
| HMBOX1 | 3.50 | 1.80 | SMARCA4 | -2.84 | -1.83 |
| IGFBP4 | 4.45 | 1.37 | TBRG4 | -5.80 | -1.23 |
| LRRC15 | 4.67 | 1.46 | TSPAN4 | -6.78 | -1.27 |
| MATK | 2.88 | 1.21 | WIPF2 | -1.31 | -1.58 |
| NFYC | 2.03 | 2.04 | ZNF84 | -3.63 | -1.10 |
| NPC2 | 1.54 | 1.36 | ZSCAN18 | -4.76 | -2.52 |
| PCBP2 | 1.97 | 1.52 |  |  |  |
| PTP4A3 | 6.98 | 2.31 |  |  |  |
| RABEP2 | 1.98 | 1.31 |  |  |  |
| RGS11 | 4.43 | 1.20 |  |  |  |
| RPS2 | 1.80 | 3.62 |  |  |  |
| RSPO3 | 1.89 | 1.16 |  |  |  |
| RUFY1 | 2.27 | 1.83 |  |  |  |
| SAT2 | 2.68 | 1.13 |  |  |  |
| SEC31A | 1.75 | 4.56 |  |  |  |
| SELPLG | 2.34 | 1.68 |  |  |  |
| SH3TC1 | 1.60 | 1.89 |  |  |  |
| SNRPB | 1.91 | 1.43 |  |  |  |
| TAF9 | 2.07 | 1.10 |  |  |  |
| THADA | 4.15 | 2.21 |  |  |  |
| TMBIM1 | 1.69 | 1.62 |  |  |  |
| TRADD | 1.87 | 1.22 |  |  |  |
| TUSC3 | 2.48 | 1.40 |  |  |  |
| UNC50 | 2.25 | 2.24 |  |  |  |
| VTI1B | 1.46 | 1.85 |  |  |  |

* Microarray data from Wan et al. (2014 Arthritis Res Ther)
